# Supplementary material
Source: PubMed Central journal article supplement (PMC3251958)
Supplement: NIHMS175878-supplement-3_si_003.pdf [file NIHMS175878-supplement-3_si_003.pdf]

## Table S-1a

A list of 8,183 unique protein-specific peptides identified in tumor, sorted by protein name.

\*MS/MS spectra were searched against the UniProt Human proteomic database; release 09/07.

\*\* The highest Xcorr observed for identified peptide. \*\*\* Total count of peptide identifications.

| Accession No*                                                                                              | Charge | XC(Max)** | Peptide*                        | TC*** | Reference No* |
|------------------------------------------------------------------------------------------------------------|--------|-----------|---------------------------------|-------|---------------|
| <b><i>10 kDa heat shock protein, mitochondrial - Homo sapiens (Human)</i></b>                              |        |           |                                 |       |               |
| P61604                                                                                                     | 3      | 6.2295    | K.SQGKVLQATVVAVGSGSKGK.G        | 6     | CH10_HUMAN    |
| P61604                                                                                                     | 1      | 2.2593    | K.FLPLFDR.V                     | 1     | CH10_HUMAN    |
| P61604                                                                                                     | 2      | 3.8147    | R.VLVERSAAETVTK.G               | 3     | CH10_HUMAN    |
| P61604                                                                                                     | 1      | 3.074     | R.SAAETVTK.G                    | 34    | CH10_HUMAN    |
| P61604                                                                                                     | 2      | 3.9025    | R.KFLPLFDRVLVER.S               | 3     | CH10_HUMAN    |
| P61604                                                                                                     | 2      | 3.2619    | R.DGDILGKYVD.-                  | 2     | CH10_HUMAN    |
| P61604                                                                                                     | 2      | 2.9068    | R.DGDILGK.Y                     | 5     | CH10_HUMAN    |
| P61604                                                                                                     | 3      | 3.9242    | K.VVLDLDDKDYFLFRDGDILGK.Y       | 1     | CH10_HUMAN    |
| P61604                                                                                                     | 2      | 3.6638    | K.VVLDLDDKDYFLFR.D              | 2     | CH10_HUMAN    |
| P61604                                                                                                     | 3      | 4.2717    | K.VLQATVVAVGSGSKGKGGEIQPVSVK.V  | 1     | CH10_HUMAN    |
| P61604                                                                                                     | 2      | 5.0989    | K.VLQATVVAVGSGSKGK.G            | 3     | CH10_HUMAN    |
| P61604                                                                                                     | 2      | 5.8123    | K.VLQATVVAVGSGSK.G              | 15    | CH10_HUMAN    |
| P61604                                                                                                     | 2      | 4.3099    | K.VGDKVLLPEYGGTK.V              | 4     | CH10_HUMAN    |
| P61604                                                                                                     | 1      | 2.7647    | K.GGIMLPEK.S                    | 5     | CH10_HUMAN    |
| P61604                                                                                                     | 2      | 3.2578    | K.FLPLFDRVLVER.S                | 10    | CH10_HUMAN    |
| P61604                                                                                                     | 2      | 3.1446    | K.GGEIQPVSVK.V                  | 4     | CH10_HUMAN    |
| P61604                                                                                                     | 3      | 4.4235    | K.GGEIQPVSVKVGDKVLLPEYGGTK.V    | 2     | CH10_HUMAN    |
| P61604                                                                                                     | 1      | 2.1886    | K.GGIM#LPEK.S                   | 1     | CH10_HUMAN    |
| P61604                                                                                                     | 1      | 2.3902    | K.VLLPEYGGTK.V                  | 3     | CH10_HUMAN    |
| P61604                                                                                                     | 3      | 5.409     | K.GGIM#LPEKSQGKVLQATVVAVGSGSK.G | 3     | CH10_HUMAN    |
| P61604                                                                                                     | 2      | 3.5411    | K.GGIMLPEKSQGK.V                | 4     | CH10_HUMAN    |
| P61604                                                                                                     | 3      | 6.201     | K.GGIMLPEKSQGKVLQATVVAVGSGSK.G  | 2     | CH10_HUMAN    |
| P61604                                                                                                     | 2      | 4.8678    | K.GKGGEIQPVSVK.V                | 8     | CH10_HUMAN    |
| P61604                                                                                                     | 3      | 3.7199    | K.GKGGEIQPVSVKVGDK.V            | 1     | CH10_HUMAN    |
| P61604                                                                                                     | 2      | 6.4404    | K.SQGKVLQATVVAVGSGSK.G          | 9     | CH10_HUMAN    |
| P61604                                                                                                     | 2      | 3.0761    | K.GGIM#LPEKSQGK.V               | 2     | CH10_HUMAN    |
| <b><i>130 kDa phosphatidylinositol 4,5-biphosphate-dependent ARF1 GTPase-activating protein - Homo</i></b> |        |           |                                 |       |               |
| Q9ULH1                                                                                                     | 2      | 3.8327    | K.SHPLDLSPNVQSR.D               | 2     | DDEF1_HUMAN   |
| Q9ULH1                                                                                                     | 2      | 3.8215    | K.GVFPVSFVHILSD.-               | 1     | DDEF1_HUMAN   |
| Q9ULH1                                                                                                     | 3      | 4.8537    | K.TTNKFEGLSQQSSTSSAK.T          | 2     | DDEF1_HUMAN   |
| Q9ULH1                                                                                                     | 2      | 3.5485    | K.FEGLSQQSSTSSAK.T              | 1     | DDEF1_HUMAN   |

| <i>Accession No*</i>                                                     | <i>Charge</i> | <i>XC(Max)**</i> | <i>Peptide*</i>                     | <i>TC***</i> | <i>Reference No*</i> |
|--------------------------------------------------------------------------|---------------|------------------|-------------------------------------|--------------|----------------------|
| Q9ULH1                                                                   | 2             | 2.9629           | K.GAVPWGNDGGPSSSSK.T                | 2            | DDEF1_HUMAN          |
| Q9ULH1                                                                   | 3             | 5.5033           | R.NAGKGPTGPPSTLPLSTQTSSGSSTLSK.K    | 1            | DDEF1_HUMAN          |
| Q9ULH1                                                                   | 2             | 3.29             | K.GPTGPPSTLPLSTQTSSGSSTLSK.K        | 1            | DDEF1_HUMAN          |
| <b><i>14 kDa phosphohistidine phosphatase - Homo sapiens (Human)</i></b> |               |                  |                                     |              |                      |
| Q9NRX4                                                                   | 2             | 4.1411           | K.AKYPDYEVTWANDGY.-                 | 7            | PHP14_HUMAN          |
| Q9NRX4                                                                   | 2             | 6.1032           | K.IHVVGYISM#AYGPAQHAISTEK.I         | 9            | PHP14_HUMAN          |
| Q9NRX4                                                                   | 3             | 4.1347           | K.IHVVGYSMAYGPAQHAISTEK.I           | 3            | PHP14_HUMAN          |
| <b><i>14-3-3 protein beta/alpha - Homo sapiens (Human)</i></b>           |               |                  |                                     |              |                      |
| P31946                                                                   | 4             | 5.039            | R.YLSEVASGDNKQTTVSNSSQQAYQEAFEISKK. | 1            | 1433B_HUMAN          |
| <b><i>14-3-3 protein epsilon - Homo sapiens (Human)</i></b>              |               |                  |                                     |              |                      |
| P62258                                                                   | 3             | 4.8616           | R.YLAEFATGNDRKEAAENSLVAYK.A         | 2            | 1433E_HUMAN          |
| P62258                                                                   | 3             | 4.0153           | K.LAEQAERYDEMVESMKK.V               | 1            | 1433E_HUMAN          |
| P62258                                                                   | 3             | 4.9962           | K.LAEQAERYDEMVESMK.K                | 2            | 1433E_HUMAN          |
| P62258                                                                   | 2             | 2.8044           | K.AAFDDAIAELDTLSEESYK.D             | 1            | 1433E_HUMAN          |
| P62258                                                                   | 2             | 2.999            | K.AASDIAMTELPPTHPIR.L               | 1            | 1433E_HUMAN          |
| <b><i>14-3-3 protein gamma - Homo sapiens (Human)</i></b>                |               |                  |                                     |              |                      |
| P61981                                                                   | 2             | 5.0552           | K.NVTELNEPLSNEER.N                  | 3            | 1433G_HUMAN          |
| <b><i>14-3-3 protein sigma - Homo sapiens (Human)</i></b>                |               |                  |                                     |              |                      |
| P31947                                                                   | 2             | 4.0983           | K.SNEEGSEEKGPEVR.E                  | 2            | 1433S_HUMAN          |
| P31947                                                                   | 3             | 4.5026           | K.LAEQAERYEDMAAFMK.G                | 1            | 1433S_HUMAN          |
| <b><i>14-3-3 protein zeta/delta - Homo sapiens (Human)</i></b>           |               |                  |                                     |              |                      |
| P63104                                                                   | 2             | 4.7685           | K.LAEQAERYDDMAACMK.S                | 2            | 1433Z_HUMAN          |
| P63104                                                                   | 2             | 3.9548           | R.YLAEVAAGDDKK.G                    | 2            | 1433Z_HUMAN          |
| <b><i>182 kDa tankyrase 1-binding protein - Homo sapiens (Human)</i></b> |               |                  |                                     |              |                      |
| Q9C0C2                                                                   | 2             | 5.0818           | R.KMNMLAGPQPYGGSK.R                 | 2            | TB182_HUMAN          |
| Q9C0C2                                                                   | 2             | 4.4122           | R.ESAVGQMGWSGGLSLR.D                | 2            | TB182_HUMAN          |
| Q9C0C2                                                                   | 2             | 3.2469           | R.ESGVGQTDWSGVEAGEFLK.S             | 2            | TB182_HUMAN          |
| Q9C0C2                                                                   | 2             | 4.7799           | R.FAATTVEEILAK.M                    | 5            | TB182_HUMAN          |
| Q9C0C2                                                                   | 2             | 3.446            | R.FSEGVLQSPSQDQEK.L                 | 2            | TB182_HUMAN          |
| Q9C0C2                                                                   | 2             | 3.3291           | R.GPLAELPSAR.K                      | 1            | TB182_HUMAN          |
| Q9C0C2                                                                   | 2             | 4.2181           | R.GSGGLFSPSTAHVPDGGALGQR.D          | 1            | TB182_HUMAN          |
| Q9C0C2                                                                   | 2             | 2.9461           | R.KM#NM#LAGPQPYGGSK.R               | 1            | TB182_HUMAN          |
| Q9C0C2                                                                   | 2             | 3.4882           | R.SLPSDLAFNGDLAK.A                  | 2            | TB182_HUMAN          |
| Q9C0C2                                                                   | 2             | 3.6415           | R.SYQFGIIGNDR.V                     | 5            | TB182_HUMAN          |
| Q9C0C2                                                                   | 2             | 4.8371           | R.WLDDLLASPPPSGGGAR.R               | 3            | TB182_HUMAN          |

| <i>Accession No*</i>                                                                                  | <i>Charge</i> | <i>XC(Max)**</i> | <i>Peptide*</i>               | <i>TC***</i> | <i>Reference No*</i> |
|-------------------------------------------------------------------------------------------------------|---------------|------------------|-------------------------------|--------------|----------------------|
| Q9C0C2                                                                                                | 2             | 3.8487           | R.YSSQDADEQDWEFQKR.D          | 2            | TB182_HUMAN          |
| Q9C0C2                                                                                                | 2             | 3.0428           | R.SQEADVQDWEFR.K              | 2            | TB182_HUMAN          |
| Q9C0C2                                                                                                | 2             | 2.8187           | R.ESAVGQM#GWSGGLSLR.D         | 2            | TB182_HUMAN          |
| Q9C0C2                                                                                                | 2             | 3.4038           | R.GWVGEFSLSVGPQR.E            | 3            | TB182_HUMAN          |
| Q9C0C2                                                                                                | 2             | 3.7875           | K.VSAPGVLTAQDR.V              | 1            | TB182_HUMAN          |
| Q9C0C2                                                                                                | 3             | 3.8609           | R.ERGVGQADWTPDLGLR.N          | 1            | TB182_HUMAN          |
| Q9C0C2                                                                                                | 2             | 3.9908           | K.KIPSVEDSLGEGSR.D            | 2            | TB182_HUMAN          |
| Q9C0C2                                                                                                | 2             | 3.5932           | R.VSGAGFSPSSK.M               | 3            | TB182_HUMAN          |
| Q9C0C2                                                                                                | 2             | 2.9072           | K.ELGVGQMDWGNLGLR.D           | 2            | TB182_HUMAN          |
| Q9C0C2                                                                                                | 2             | 3.8792           | K.YGQGAGEGSTR.E               | 7            | TB182_HUMAN          |
| Q9C0C2                                                                                                | 2             | 3.3634           | R.AAEPQEQEFQK.S               | 2            | TB182_HUMAN          |
| Q9C0C2                                                                                                | 2             | 3.0737           | R.DAELQDQEFQK.R               | 1            | TB182_HUMAN          |
| Q9C0C2                                                                                                | 2             | 4.5345           | R.DLEVTCDPDSGGSQGLR.G         | 4            | TB182_HUMAN          |
| Q9C0C2                                                                                                | 2             | 2.8165           | R.DSLGTYSSR.D                 | 1            | TB182_HUMAN          |
| Q9C0C2                                                                                                | 2             | 3.0077           | R.DSQGTYSSR.D                 | 6            | TB182_HUMAN          |
| Q9C0C2                                                                                                | 2             | 3.3511           | R.DVSLGTYGSR.A                | 4            | TB182_HUMAN          |
| Q9C0C2                                                                                                | 2             | 3.3096           | R.EMEEELVPTGSEPGDTR.A         | 1            | TB182_HUMAN          |
| Q9C0C2                                                                                                | 2             | 3.9751           | R.EAAFSPGQQDWSR.D             | 2            | TB182_HUMAN          |
| Q9C0C2                                                                                                | 2             | 5.8023           | K.SKDLAEVGEVGGGHSQAR.E        | 2            | TB182_HUMAN          |
| Q9C0C2                                                                                                | 2             | 3.0803           | R.EM#EEELVPTGSEPGDTR.A        | 1            | TB182_HUMAN          |
| Q9C0C2                                                                                                | 2             | 3.6967           | R.DAELQDQEFQKR.D              | 4            | TB182_HUMAN          |
| <b><i>1-phosphatidylinositol-4,5-bisphosphate phosphodiesterase beta 1 - Homo sapiens (Human)</i></b> |               |                  |                               |              |                      |
| Q9NQ66                                                                                                | 2             | 3.0253           | K.YNEIQNDYLR.R                | 2            | PLCB1_HUMAN          |
| <b><i>26S protease regulatory subunit 7 - Homo sapiens (Human)</i></b>                                |               |                  |                               |              |                      |
| P35998                                                                                                | 2             | 3.5337           | K.FVVDLSQVAPTIEEGMR.V         | 1            | PRS7_HUMAN           |
| <b><i>26S proteasome non-ATPase regulatory subunit 2 - Homo sapiens (Human)</i></b>                   |               |                  |                               |              |                      |
| Q13200                                                                                                | 3             | 4.8885           | K.APVQPQQSPAAAPGGTDEKPSGK.E   | 2            | PSMD2_HUMAN          |
| <b><i>26S proteasome non-ATPase regulatory subunit 4 - Homo sapiens (Human)</i></b>                   |               |                  |                               |              |                      |
| P55036                                                                                                | 3             | 4.6507           | R.AAAASAAEAGIATTGTEDSDDALLK.M | 4            | PSMD4_HUMAN          |
| <b><i>26S proteasome non-ATPase regulatory subunit 9 - Homo sapiens (Human)</i></b>                   |               |                  |                               |              |                      |
| O00233                                                                                                | 3             | 5.5857           | R.HNIICLQNDHK.A               | 1            | PSMD9_HUMAN          |
| O00233                                                                                                | 2             | 3.6075           | R.SVDLYQVR.T                  | 5            | PSMD9_HUMAN          |
| O00233                                                                                                | 3             | 4.0588           | R.RKEEIEAQIK.A                | 5            | PSMD9_HUMAN          |
| O00233                                                                                                | 2             | 4.0098           | K.ANYDVLESQK.G                | 2            | PSMD9_HUMAN          |
| O00233                                                                                                | 2             | 4.0943           | R.QSGGSSQAGAVTVSDVQELMR.R     | 3            | PSMD9_HUMAN          |

| <i>Accession No*</i> | <i>Charge</i> | <i>XC(Max)**</i> | <i>Peptide*</i>            | <i>TC***</i> | <i>Reference No*</i> |
|----------------------|---------------|------------------|----------------------------|--------------|----------------------|
| O00233               | 3             | 4.3134           | R.QSGGSSQAGAVTVSDVQELM#R.R | 1            | PSMD9_HUMAN          |
| O00233               | 2             | 4.2292           | R.KLGQSESQGPFR.A           | 4            | PSMD9_HUMAN          |
| O00233               | 2             | 3.1231           | K.QVEEALHQLHAR.D           | 2            | PSMD9_HUMAN          |
| O00233               | 2             | 4.3835           | K.LGQSESQGPFR.A            | 4            | PSMD9_HUMAN          |
| O00233               | 2             | 3.4773           | K.GLLGCNIIPLQR.-           | 4            | PSMD9_HUMAN          |
| O00233               | 2             | 4.1137           | K.GIGM#NEPLVDCEGYPR.S      | 3            | PSMD9_HUMAN          |
| O00233               | 2             | 4.015            | R.DMAEAHKEAM#SR.K          | 2            | PSMD9_HUMAN          |
| O00233               | 2             | 4.3239           | K.GIGMNEPLVDCEGYPR.S       | 4            | PSMD9_HUMAN          |

***28 kDa heat- and acid-stable phosphoprotein - Homo sapiens (Human)***

|        |   |        |                         |    |             |
|--------|---|--------|-------------------------|----|-------------|
| Q13442 | 1 | 3.0665 | R.M#QSLSLNK.-           | 8  | HAP28_HUMAN |
| Q13442 | 3 | 4.6164 | K.RKGVEGLIDIENPNR.V     | 2  | HAP28_HUMAN |
| Q13442 | 2 | 2.9848 | R.QYTSPEEIDAQLQAEKQK.A  | 1  | HAP28_HUMAN |
| Q13442 | 1 | 2.9046 | K.VTQLDLGPK.E           | 3  | HAP28_HUMAN |
| Q13442 | 3 | 4.3547 | R.EEEEKQEGGDGAAGDPKK.E  | 4  | HAP28_HUMAN |
| Q13442 | 3 | 3.8382 | R.EREEIEKQK.A           | 1  | HAP28_HUMAN |
| Q13442 | 2 | 5.3286 | R.KGVEGLIDIENPNR.V      | 9  | HAP28_HUMAN |
| Q13442 | 3 | 5.1715 | R.QYTSPEEIDAQLQAEK.Q    | 3  | HAP28_HUMAN |
| Q13442 | 2 | 3.1509 | K.MHLAGKTEQAK.A         | 2  | HAP28_HUMAN |
| Q13442 | 2 | 3.9878 | R.KAKDDATLSGK.R         | 10 | HAP28_HUMAN |
| Q13442 | 3 | 5.3078 | K.KVTQLDLGPKELSR.R      | 5  | HAP28_HUMAN |
| Q13442 | 2 | 3.7963 | K.KVTQLDLGPK.E          | 6  | HAP28_HUMAN |
| Q13442 | 3 | 5.2038 | K.KSLDSDESEDEEDDYQK.R   | 2  | HAP28_HUMAN |
| Q13442 | 2 | 3.2005 | K.GVEGLIDIENPNRVAQTTK.K | 1  | HAP28_HUMAN |
| Q13442 | 2 | 4.829  | K.GVEGLIDIENPNR.V       | 7  | HAP28_HUMAN |
| Q13442 | 1 | 2.2097 | K.DDATLSGK.R            | 2  | HAP28_HUMAN |
| Q13442 | 2 | 3.9639 | K.AKDDATLSGKR.M         | 3  | HAP28_HUMAN |
| Q13442 | 2 | 3.2411 | K.AKDDATLSGK.R          | 9  | HAP28_HUMAN |
| Q13442 | 2 | 4.8487 | K.SLDSDESEDEEDDYQK.R    | 6  | HAP28_HUMAN |
| Q13442 | 2 | 3.9825 | K.M#HLAGKTEQAK.A        | 5  | HAP28_HUMAN |

***28S ribosomal protein S31, mitochondrial precursor - Homo sapiens (Human)***

|        |   |        |                                  |   |            |
|--------|---|--------|----------------------------------|---|------------|
| Q92665 | 2 | 3.1742 | K.ISFSNIISDM#K.V                 | 1 | RT31_HUMAN |
| Q92665 | 2 | 3.3302 | K.SELLSQLQHQHEESR.A              | 1 | RT31_HUMAN |
| Q92665 | 2 | 4.6086 | K.ISFSNIISDMK.V                  | 3 | RT31_HUMAN |
| Q92665 | 3 | 4.2414 | K.RIEPLSPELVAAASAVADSLPFDKQTTK.S | 1 | RT31_HUMAN |

***39S ribosomal protein 54, mitochondrial precursor - Homo sapiens (Human)***

| <i>Accession No*</i>                                                                             | <i>Charge</i> | <i>XC(Max)**</i> | <i>Peptide*</i>                 | <i>TC***</i> | <i>Reference No*</i> |
|--------------------------------------------------------------------------------------------------|---------------|------------------|---------------------------------|--------------|----------------------|
| Q6P161                                                                                           | 2             | 2.8277           | K.TLEELDPESE.R                  | 1            | RM54_HUMAN           |
| <b><i>39S ribosomal protein L12, mitochondrial precursor - Homo sapiens (Human)</i></b>          |               |                  |                                 |              |                      |
| P52815                                                                                           | 2             | 3.2881           | R.LTEAKPVDKVK.L                 | 4            | RM12_HUMAN           |
| P52815                                                                                           | 2             | 3.2401           | K.EIKNYIQGINLVQAK.K             | 2            | RM12_HUMAN           |
| P52815                                                                                           | 2             | 4.1911           | K.IKAALEAVGGTVVLE.-             | 1            | RM12_HUMAN           |
| P52815                                                                                           | 2             | 4.4916           | K.KLVESLPQEIK.A                 | 3            | RM12_HUMAN           |
| P52815                                                                                           | 2             | 3.4344           | K.LVESLPQEIK.A                  | 2            | RM12_HUMAN           |
| P52815                                                                                           | 2             | 4.4337           | K.NYIQGINLVQAK.K                | 4            | RM12_HUMAN           |
| P52815                                                                                           | 2             | 3.1783           | R.LTEAKPVDK.V                   | 3            | RM12_HUMAN           |
| <b><i>39S ribosomal protein L14, mitochondrial precursor - Homo sapiens (Human)</i></b>          |               |                  |                                 |              |                      |
| Q6P1L8                                                                                           | 2             | 3.1877           | K.VGDQILLAIK.G                  | 1            | RM14_HUMAN           |
| <b><i>39S ribosomal protein L34, mitochondrial precursor - Homo sapiens (Human)</i></b>          |               |                  |                                 |              |                      |
| Q9BQ48                                                                                           | 2             | 2.8951           | R.GNEYQPSNIK.R                  | 1            | RM34_HUMAN           |
| <b><i>39S ribosomal protein L40, mitochondrial precursor - Homo sapiens (Human)</i></b>          |               |                  |                                 |              |                      |
| Q9NQ50                                                                                           | 2             | 4.0693           | K.ATQELIPIEDFITPLK.F            | 2            | RM40_HUMAN           |
| <b><i>39S ribosomal protein L52, mitochondrial precursor - Homo sapiens (Human)</i></b>          |               |                  |                                 |              |                      |
| Q86TS9                                                                                           | 3             | 4.8027           | R.LQQGLAANPSGYGPLELPDWSYADGRPAP | 1            | RM52_HUMAN           |
| Q86TS9                                                                                           | 3             | 4.9076           | R.LQQGLAANPSGYGPLELPDWSYADGRPAP | 1            | RM52_HUMAN           |
| <b><i>3-hydroxyisobutyrate dehydrogenase, mitochondrial precursor - Homo sapiens (Human)</i></b> |               |                  |                                 |              |                      |
| P31937                                                                                           | 2             | 3.3806           | K.DLGLAQDSATSTK.S               | 1            | 3HIDH_HUMAN          |
| P31937                                                                                           | 2             | 3.9306           | K.TPVGFIGLGNMGNPM#AK.N          | 1            | 3HIDH_HUMAN          |
| P31937                                                                                           | 2             | 4.6762           | K.TPVGFIGLGNMGNPMAK.N           | 1            | 3HIDH_HUMAN          |
| <b><i>3-ketoacyl-CoA thiolase, mitochondrial - Homo sapiens (Human)</i></b>                      |               |                  |                                 |              |                      |
| P42765                                                                                           | 2             | 3.1017           | K.AANDAGYFNDEMAPIEVK.T          | 2            | THIM_HUMAN           |
| <b><i>4.1G protein - Homo sapiens (Human)</i></b>                                                |               |                  |                                 |              |                      |
| Q9H1C6                                                                                           | 2             | 3.1119           | K.YLMPTIWTVEEK.A                | 2            | Q9H1C6_HUMA          |
| Q9H1C6                                                                                           | 2             | 3.9967           | K.SSHETLNIVEEK.K                | 3            | Q9H1C6_HUMA          |
| <b><i>40S ribosomal protein S11 - Homo sapiens (Human)</i></b>                                   |               |                  |                                 |              |                      |
| P62280                                                                                           | 2             | 4.2374           | R.AYQKQPTIFQNK.K                | 2            | RS11_HUMAN           |
| P62280                                                                                           | 3             | 4.2039           | K.RVLLGETGKEK.L                 | 2            | RS11_HUMAN           |
| P62280                                                                                           | 2             | 3.1372           | K.EAIEGTIDKK.C                  | 2            | RS11_HUMAN           |
| P62280                                                                                           | 1             | 2.439            | K.NIGLGFK.T                     | 3            | RS11_HUMAN           |
| <b><i>40S ribosomal protein S13 - Homo sapiens (Human)</i></b>                                   |               |                  |                                 |              |                      |
| P62277                                                                                           | 2             | 3.5354           | K.GLSQSALPYR.R                  | 2            | RS13_HUMAN           |
| P62277                                                                                           | 2             | 2.9752           | K.GLTPSQIGVILR.D                | 3            | RS13_HUMAN           |

| <i>Accession No*</i>                                           | <i>Charge</i> | <i>XC(Max)**</i> | <i>Peptide*</i>                  | <i>TC***</i> | <i>Reference No*</i> |
|----------------------------------------------------------------|---------------|------------------|----------------------------------|--------------|----------------------|
| P62277                                                         | 2             | 3.3002           | K.KGLTPSQIGVILR.D                | 2            | RS13_HUMAN           |
| P62277                                                         | 2             | 4.3956           | K.LTSDDVKEQIYK.L                 | 3            | RS13_HUMAN           |
| <b><i>40S ribosomal protein S14 - Homo sapiens (Human)</i></b> |               |                  |                                  |              |                      |
| P62263                                                         | 2             | 3.1361           | K.TPGPGAQSALR.A                  | 2            | RS14_HUMAN           |
| P62263                                                         | 2             | 3.7213           | R.IEDVTPIPSDSTR.R                | 4            | RS14_HUMAN           |
| P62263                                                         | 2             | 2.7124           | R.IEDVTPIPSDSTRR.K               | 1            | RS14_HUMAN           |
| P62263                                                         | 3             | 4.4397           | K.ADRDESSPYAAMLAAQDVAQR.C        | 3            | RS14_HUMAN           |
| P62263                                                         | 2             | 3.7964           | K.IGRIEDVTPIPSDSTR.R             | 4            | RS14_HUMAN           |
| P62263                                                         | 3             | 4.5247           | R.TKTPGPGAQSALR.A                | 3            | RS14_HUMAN           |
| P62263                                                         | 2             | 4.5208           | K.IGRIEDVTPIPSDSTRR.K            | 5            | RS14_HUMAN           |
| <b><i>40S ribosomal protein S15 - Homo sapiens (Human)</i></b> |               |                  |                                  |              |                      |
| P62841                                                         | 3             | 4.7012           | K.KEAPPMKPEVVK.T                 | 3            | RS15_HUMAN           |
| <b><i>40S ribosomal protein S17 - Homo sapiens (Human)</i></b> |               |                  |                                  |              |                      |
| P08708                                                         | 2             | 3.5969           | K.LLDFGSLSNLQVTQPTVGM#NFK.T      | 3            | RS17_HUMAN           |
| P08708                                                         | 3             | 4.7104           | K.LLDFGSLSNLQVTQPTVGMNFK.T       | 1            | RS17_HUMAN           |
| P08708                                                         | 2             | 2.7975           | K.LQEEERER.R                     | 3            | RS17_HUMAN           |
| P08708                                                         | 2             | 3.5782           | R.LGNDFHTNKR.V                   | 2            | RS17_HUMAN           |
| P08708                                                         | 3             | 7.3801           | R.RDNYVPEVSALDQEIIIEVDPDTKEMLK.L | 1            | RS17_HUMAN           |
| <b><i>40S ribosomal protein S18 - Homo sapiens (Human)</i></b> |               |                  |                                  |              |                      |
| P62269                                                         | 2             | 3.816            | K.RAGELTEDEVER.V                 | 2            | RS18_HUMAN           |
| P62269                                                         | 2             | 2.8714           | R.VITIMQNPR.Q                    | 2            | RS18_HUMAN           |
| P62269                                                         | 2             | 3.0852           | R.KADIDLTR.A                     | 2            | RS18_HUMAN           |
| P62269                                                         | 2             | 2.962            | R.AGELTEDEVER.V                  | 1            | RS18_HUMAN           |
| P62269                                                         | 3             | 4.5471           | R.AGELTEDEVERVITIMQNPR.Q         | 1            | RS18_HUMAN           |
| <b><i>40S ribosomal protein S19 - Homo sapiens (Human)</i></b> |               |                  |                                  |              |                      |
| P39019                                                         | 1             | 3.2499           | R.GGAGVGSMTK.I                   | 3            | RS19_HUMAN           |
| P39019                                                         | 3             | 5.736            | K.HKELAPYDENWFYTR.A              | 4            | RS19_HUMAN           |
| P39019                                                         | 2             | 3.3946           | R.VLQALEGLK.M                    | 2            | RS19_HUMAN           |
| P39019                                                         | 2             | 3.182            | R.RVLQALEGLK.M                   | 6            | RS19_HUMAN           |
| P39019                                                         | 2             | 3.3416           | R.IAGQVAAANKKH.-                 | 2            | RS19_HUMAN           |
| P39019                                                         | 2             | 3.369            | R.IAGQVAAANKK.H                  | 3            | RS19_HUMAN           |
| P39019                                                         | 1             | 3.1372           | R.IAGQVAAANK.K                   | 11           | RS19_HUMAN           |
| P39019                                                         | 3             | 5.1679           | R.DLDRIAGQVAAANKK.H              | 3            | RS19_HUMAN           |
| P39019                                                         | 2             | 4.869            | R.DLDRIAGQVAAANK.K               | 6            | RS19_HUMAN           |
| P39019                                                         | 2             | 2.9597           | R.ALAFLKK.S                      | 2            | RS19_HUMAN           |

| <i>Accession No*</i>                                                             | <i>Charge</i> | <i>XC(Max)**</i> | <i>Peptide*</i>      | <i>TC***</i> | <i>Reference No*</i> |
|----------------------------------------------------------------------------------|---------------|------------------|----------------------|--------------|----------------------|
| P39019                                                                           | 2             | 2.8849           | R.ALA AFLK.K         | 3            | RS19_HUMAN           |
| P39019                                                                           | 3             | 4.0363           | K.LKVPEWVDTVK.L      | 5            | RS19_HUMAN           |
| P39019                                                                           | 1             | 3.5671           | K.DVNQQEFVR.A        | 8            | RS19_HUMAN           |
| P39019                                                                           | 2             | 3.1808           | K.VPEWVDTVK.L        | 2            | RS19_HUMAN           |
| <b><i>40S ribosomal protein S19-binding protein 1 - Homo sapiens (Human)</i></b> |               |                  |                      |              |                      |
| Q86WX3                                                                           | 2             | 3.4688           | R.STVAESVSQILR.Q     | 4            | S19BP_HUMAN          |
| <b><i>40S ribosomal protein S2 - Homo sapiens (Human)</i></b>                    |               |                  |                      |              |                      |
| P15880                                                                           | 3             | 4.2298           | K.SPYQEFTDHLVK.T     | 2            | RS2_HUMAN            |
| P15880                                                                           | 1             | 2.1805           | R.TQAPAVATT.-        | 1            | RS2_HUMAN            |
| <b><i>40S ribosomal protein S20 - Homo sapiens (Human)</i></b>                   |               |                  |                      |              |                      |
| P60866                                                                           | 2             | 3.7472           | R.LIDLHSPSEIVK.Q     | 4            | RS20_HUMAN           |
| P60866                                                                           | 1             | 2.4006           | K.VCADLIR.G          | 2            | RS20_HUMAN           |
| P60866                                                                           | 2             | 3.3666           | K.DTGKTPVEPEVAIHR.I  | 2            | RS20_HUMAN           |
| P60866                                                                           | 2             | 3.4029           | K.RLIDLHSPSEIVK.Q    | 2            | RS20_HUMAN           |
| P60866                                                                           | 3             | 4.3526           | K.TPVEPEVAIHR.I      | 3            | RS20_HUMAN           |
| <b><i>40S ribosomal protein S21 - Homo sapiens (Human)</i></b>                   |               |                  |                      |              |                      |
| P63220                                                                           | 2             | 2.9909           | R.M#GESD DSILR.L     | 2            | RS21_HUMAN           |
| P63220                                                                           | 2             | 3.6447           | R.MGESD DSILR.L      | 5            | RS21_HUMAN           |
| P63220                                                                           | 2             | 3.6621           | R.RMGESD DSILR.L     | 2            | RS21_HUMAN           |
| <b><i>40S ribosomal protein S23 - Homo sapiens (Human)</i></b>                   |               |                  |                      |              |                      |
| P62266                                                                           | 2             | 2.9793           | K.GHAVGDIPGVR.F      | 2            | RS23_HUMAN           |
| P62266                                                                           | 2             | 4.6538           | K.VANVSL LALYK.G     | 5            | RS23_HUMAN           |
| P62266                                                                           | 2             | 3.4091           | R.KGHAVGDIPGVR.F     | 2            | RS23_HUMAN           |
| <b><i>40S ribosomal protein S24 - Homo sapiens (Human)</i></b>                   |               |                  |                      |              |                      |
| P62847                                                                           | 3             | 4.3922           | R.KQMVIDVLHPGK.A     | 1            | RS24_HUMAN           |
| P62847                                                                           | 2             | 3.3319           | K.TTGFGMIYDSL DYAK.K | 2            | RS24_HUMAN           |
| <b><i>40S ribosomal protein S25 - Homo sapiens (Human)</i></b>                   |               |                  |                      |              |                      |
| P62851                                                                           | 2             | 4.3287           | R.NTKGGDAPAAGEDA.-   | 9            | RS25_HUMAN           |
| P62851                                                                           | 3             | 4.5021           | R.DKLNNLVLFDKATYDK.L | 1            | RS25_HUMAN           |
| P62851                                                                           | 2             | 3.9405           | R.DKLNNLVLFDK.A      | 6            | RS25_HUMAN           |
| P62851                                                                           | 2             | 2.9483           | R.AALQELLSK.G        | 5            | RS25_HUMAN           |
| P62851                                                                           | 2             | 4.6688           | K.LNNLVLFDKATYDK.L   | 3            | RS25_HUMAN           |
| P62851                                                                           | 1             | 2.4474           | K.GGDAPAAGEDA.-      | 2            | RS25_HUMAN           |
| P62851                                                                           | 2             | 3.9868           | K.LNNLVLFDK.A        | 8            | RS25_HUMAN           |
| <b><i>40S ribosomal protein S28 - Homo sapiens (Human)</i></b>                   |               |                  |                      |              |                      |

| <i>Accession No*</i>                                           | <i>Charge</i> | <i>XC(Max)**</i> | <i>Peptide*</i>             | <i>TC***</i> | <i>Reference No*</i> |
|----------------------------------------------------------------|---------------|------------------|-----------------------------|--------------|----------------------|
| P62857                                                         | 2             | 3.795            | R.TGSQQQCTQVR.V             | 30           | RS28_HUMAN           |
| P62857                                                         | 3             | 3.9031           | K.GPVREGDVLTLLESER.E        | 2            | RS28_HUMAN           |
| P62857                                                         | 2             | 3.1235           | R.VEFM#DDTSR.S              | 2            | RS28_HUMAN           |
| P62857                                                         | 1             | 3.0766           | R.VEFMDDTSR.S               | 6            | RS28_HUMAN           |
| P62857                                                         | 2             | 3.7871           | R.EGDVLTLESEREAR.R          | 4            | RS28_HUMAN           |
| P62857                                                         | 3             | 3.811            | K.GPVREGDVLTLLESEREAR.R     | 1            | RS28_HUMAN           |
| P62857                                                         | 3             | 4.343            | R.NVKGPVREGDVLTLLESER.E     | 1            | RS28_HUMAN           |
| P62857                                                         | 2             | 3.5416           | R.EGDVLTLESER.E             | 1            | RS28_HUMAN           |
| <b><i>40S ribosomal protein S29 - Homo sapiens (Human)</i></b> |               |                  |                             |              |                      |
| P62273                                                         | 2             | 3.461            | K.DIGFIKLD.-                | 5            | RS29_HUMAN           |
| <b><i>40S ribosomal protein S3 - Homo sapiens (Human)</i></b>  |               |                  |                             |              |                      |
| P23396                                                         | 2             | 3.9876           | K.GGKPEPPAMPQPVPPTA.-       | 7            | RS3_HUMAN            |
| P23396                                                         | 2             | 3.879            | K.DEILPTTPISEQK.G           | 8            | RS3_HUMAN            |
| P23396                                                         | 2             | 3.5388           | K.GGKPEPPAM#PQPVPPTA.-      | 2            | RS3_HUMAN            |
| <b><i>40S ribosomal protein S30 - Homo sapiens (Human)</i></b> |               |                  |                             |              |                      |
| P62861                                                         | 2             | 2.7041           | R.RMQYNR.R                  | 1            | RS30_HUMAN           |
| P62861                                                         | 2             | 3.416            | R.RFVNVVPTFGKK.K            | 2            | RS30_HUMAN           |
| P62861                                                         | 2             | 3.933            | R.RFVNVVPTFGKK.K            | 10           | RS30_HUMAN           |
| P62861                                                         | 2             | 2.9714           | R.FVNVVPTFGKK.K             | 3            | RS30_HUMAN           |
| P62861                                                         | 2             | 2.9352           | R.FVNVVPTFGKK.K             | 1            | RS30_HUMAN           |
| <b><i>40S ribosomal protein S3a - Homo sapiens (Human)</i></b> |               |                  |                             |              |                      |
| P61247                                                         | 2             | 4.1171           | K.LMELHGEGSSSGK.A           | 4            | RS3A_HUMAN           |
| P61247                                                         | 2             | 2.9479           | R.VFEVSLADLQNDEVAFRK.F      | 1            | RS3A_HUMAN           |
| P61247                                                         | 2             | 3.8729           | R.EVQTNLKEVVNK.L            | 1            | RS3A_HUMAN           |
| P61247                                                         | 2             | 3.7253           | K.VERADGYEPPVQESV.-         | 2            | RS3A_HUMAN           |
| P61247                                                         | 2             | 3.3917           | K.FKLITEDVQGK.N             | 1            | RS3A_HUMAN           |
| P61247                                                         | 2             | 4.5616           | K.ATGDETGAKVER.A            | 6            | RS3A_HUMAN           |
| P61247                                                         | 2             | 2.8967           | K.APAMFNIR.N                | 2            | RS3A_HUMAN           |
| P61247                                                         | 2             | 2.776            | K.APAM#FNIR.N               | 1            | RS3A_HUMAN           |
| P61247                                                         | 3             | 4.2718           | R.VFEVSLADLQNDEVAFRK.F      | 1            | RS3A_HUMAN           |
| P61247                                                         | 2             | 3.8477           | K.LM#ELHGEGSSSGK.A          | 2            | RS3A_HUMAN           |
| <b><i>40S ribosomal protein S7 - Homo sapiens (Human)</i></b>  |               |                  |                             |              |                      |
| P62081                                                         | 3             | 4.0439           | R.TLTAVHDAILEDLVFPSEIVGK.R  | 1            | RS7_HUMAN            |
| P62081                                                         | 3             | 4.8626           | R.TLTAVHDAILEDLVFPSEIVGKR.I | 2            | RS7_HUMAN            |
| P62081                                                         | 2             | 3.7921           | K.LTGKDVNFEPFQQL.-          | 3            | RS7_HUMAN            |



| <i>Accession No*</i>                                                          | <i>Charge</i> | <i>XC(Max)**</i> | <i>Peptide*</i>                   | <i>TC***</i> | <i>Reference No*</i> |
|-------------------------------------------------------------------------------|---------------|------------------|-----------------------------------|--------------|----------------------|
| P62081                                                                        | 2             | 3.6017           | K.DVNFEFPEFQL.-                   | 2            | RS7_HUMAN            |
| P62081                                                                        | 3             | 3.9773           | K.AQQNNVEHKVETFSGVYK.K            | 1            | RS7_HUMAN            |
| <b><i>40S ribosomal protein S9 - Homo sapiens (Human)</i></b>                 |               |                  |                                   |              |                      |
| P46781                                                                        | 2             | 2.9123           | R.SPYGGGRPGR.V                    | 2            | RS9_HUMAN            |
| P46781                                                                        | 2             | 3.9264           | K.KGQGGAGAGDDEEED.-               | 10           | RS9_HUMAN            |
| <b><i>45 kDa calcium-binding protein precursor - Homo sapiens (Human)</i></b> |               |                  |                                   |              |                      |
| Q9BRK5                                                                        | 2             | 2.8189           | K.YSEFFTGSK.L                     | 1            | CAB45_HUMAN          |
| <b><i>4F2 cell-surface antigen heavy chain - Homo sapiens (Human)</i></b>     |               |                  |                                   |              |                      |
| P08195                                                                        | 2             | 3.848            | R.LLTSFLPAQLLR.L                  | 2            | 4F2_HUMAN            |
| <b><i>5'-3' exoribonuclease 1 - Homo sapiens (Human)</i></b>                  |               |                  |                                   |              |                      |
| Q8IZH2                                                                        | 3             | 4.8667           | K.EAQSSQATPVQTSQPDSNIVK.V         | 1            | XRN1_HUMAN           |
| <b><i>5'-3' exoribonuclease 2 - Homo sapiens (Human)</i></b>                  |               |                  |                                   |              |                      |
| Q9H0D6                                                                        | 2             | 2.924            | R.GVGAPELLPWNR.M                  | 1            | XRN2_HUMAN           |
| Q9H0D6                                                                        | 2             | 3.9064           | R.NSPGSQVASNPR.Q                  | 4            | XRN2_HUMAN           |
| <b><i>5-azacytidine-induced protein 1 - Homo sapiens (Human)</i></b>          |               |                  |                                   |              |                      |
| Q9UPN4                                                                        | 2             | 3.57             | R.SNSTTQVSQPR.S                   | 2            | AZI1_HUMAN           |
| Q9UPN4                                                                        | 3             | 4.0874           | R.RPGSAATTKPIVR.S                 | 1            | AZI1_HUMAN           |
| <b><i>60S acidic ribosomal protein P1 - Homo sapiens (Human)</i></b>          |               |                  |                                   |              |                      |
| P05386                                                                        | 2             | 4.1974           | K.AAGVNVEPFWPGLFAK.A              | 4            | RLA1_HUMAN           |
| <b><i>60S acidic ribosomal protein P2 - Homo sapiens (Human)</i></b>          |               |                  |                                   |              |                      |
| P05387                                                                        | 2             | 5.4283           | K.VISELNGKNIEDVIAQGIGK.L          | 2            | RLA2_HUMAN           |
| P05387                                                                        | 2             | 5.3214           | -.M#RYVASYLLAALGGNSSPSAK.D        | 4            | RLA2_HUMAN           |
| P05387                                                                        | 2             | 4.5362           | R.YVASYLLAALGGNSSPSAK.D           | 9            | RLA2_HUMAN           |
| P05387                                                                        | 1             | 2.5898           | K.VISELNGK.N                      | 5            | RLA2_HUMAN           |
| P05387                                                                        | 2             | 4.9159           | K.NIEDVIAQGIGK.L                  | 9            | RLA2_HUMAN           |
| P05387                                                                        | 3             | 3.9349           | K.LASVPAGGAVAVSAAPGSAAPAAGSAPAAAE | 1            | RLA2_HUMAN           |
| P05387                                                                        | 3             | 5.1775           | K.KILDSVGIEADDDRLNK.V             | 9            | RLA2_HUMAN           |
| P05387                                                                        | 3             | 5.2299           | K.ILDSVGIEADDDRLNKVISELNGK.N      | 3            | RLA2_HUMAN           |
| P05387                                                                        | 3             | 5.3302           | K.ILDSVGIEADDDRLNK.V              | 8            | RLA2_HUMAN           |
| P05387                                                                        | 2             | 6.5868           | -.MRYVASYLLAALGGNSSPSAK.D         | 3            | RLA2_HUMAN           |
| <b><i>60S ribosomal protein L10-like - Homo sapiens (Human)</i></b>           |               |                  |                                   |              |                      |
| Q96L21                                                                        | 2             | 4.1762           | K.LQNEEHVIEALR.R                  | 1            | RL10L_HUMAN          |
| <b><i>60S ribosomal protein L11 - Homo sapiens (Human)</i></b>                |               |                  |                                   |              |                      |
| P62913                                                                        | 2             | 3.3533           | K.YDGIILPGK.-                     | 1            | RL11_HUMAN           |
| P62913                                                                        | 3             | 4.1802           | R.WFQQKYDGIILPGK.-                | 1            | RL11_HUMAN           |

| <i>Accession No*</i>                                            | <i>Charge</i> | <i>XC(Max)**</i> | <i>Peptide*</i>               | <i>TC***</i> | <i>Reference No*</i> |
|-----------------------------------------------------------------|---------------|------------------|-------------------------------|--------------|----------------------|
| <b><i>60S ribosomal protein L13 - Homo sapiens (Human)</i></b>  |               |                  |                               |              |                      |
| P26373                                                          | 3             | 4.7021           | K.KGDSSAEELK LATQLTGPVMPVR.N  | 2            | RL13_HUMAN           |
| P26373                                                          | 2             | 2.9085           | R.VITEEEK.N                   | 1            | RL13_HUMAN           |
| P26373                                                          | 2             | 3.1644           | R.GFSLEELR.V                  | 1            | RL13_HUMAN           |
| P26373                                                          | 2             | 4.9259           | R.AKEAAEQDVEKK.K              | 3            | RL13_HUMAN           |
| P26373                                                          | 3             | 5.0307           | R.AKEAAEQDVEK.K               | 8            | RL13_HUMAN           |
| P26373                                                          | 2             | 5.0585           | K.STESLQANVQR.L               | 4            | RL13_HUMAN           |
| P26373                                                          | 2             | 3.6096           | R.VITEEEKNFK.A                | 6            | RL13_HUMAN           |
| P26373                                                          | 3             | 5.1744           | K.KGDSSAEELK LATQLTGPVM#PVR.N | 2            | RL13_HUMAN           |
| P26373                                                          | 2             | 3.5862           | K.KGDSSAEELK.L                | 11           | RL13_HUMAN           |
| P26373                                                          | 2             | 3.3468           | K.EAAEQDVEKKK.-               | 2            | RL13_HUMAN           |
| P26373                                                          | 2             | 3.0777           | K.EAAEQDVEKK.K                | 3            | RL13_HUMAN           |
| P26373                                                          | 1             | 2.7332           | K.EAAEQDVEK.K                 | 2            | RL13_HUMAN           |
| P26373                                                          | 3             | 4.008            | K.ARVITEEEKNFK.A              | 2            | RL13_HUMAN           |
| P26373                                                          | 2             | 3.5              | K.LATQLTGPVM#PVR.N            | 3            | RL13_HUMAN           |
| P26373                                                          | 2             | 3.3552           | K.LATQLTGPVMPVR.N             | 4            | RL13_HUMAN           |
| <b><i>60S ribosomal protein L17 - Homo sapiens (Human)</i></b>  |               |                  |                               |              |                      |
| P18621                                                          | 2             | 3.7031           | K.EQIVPKPEEEVAQK.K            | 4            | RL17_HUMAN           |
| P18621                                                          | 1             | 2.9724           | R.YSLDPENPTK.S                | 3            | RL17_HUMAN           |
| <b><i>60S ribosomal protein L18 - Homo sapiens (Human)</i></b>  |               |                  |                               |              |                      |
| Q07020                                                          | 2             | 4.3207           | K.ILTFDQLALDSPK.G             | 4            | RL18_HUMAN           |
| Q07020                                                          | 2             | 2.8749           | K.TAVVVGITITDDVR.V            | 1            | RL18_HUMAN           |
| Q07020                                                          | 2             | 3.1698           | K.APGTPHSHTKPYVR.S            | 2            | RL18_HUMAN           |
| <b><i>60S ribosomal protein L18a - Homo sapiens (Human)</i></b> |               |                  |                               |              |                      |
| Q02543                                                          | 2             | 2.9484           | K.VEEIAASK.C                  | 1            | RL18A_HUMAN          |
| <b><i>60S ribosomal protein L19 - Homo sapiens (Human)</i></b>  |               |                  |                               |              |                      |
| P84098                                                          | 2             | 2.805            | K.RLASSVLR.C                  | 1            | RL19_HUMAN           |
| P84098                                                          | 2             | 3.263            | K.TLSKEEETK.K                 | 5            | RL19_HUMAN           |
| P84098                                                          | 2             | 3.6307           | K.TLSKEEETKK.-                | 12           | RL19_HUMAN           |
| P84098                                                          | 1             | 2.2684           | R.LASSVLR.C                   | 1            | RL19_HUMAN           |
| P84098                                                          | 3             | 5.6917           | K.KVWLDPNETNEIANANSR.Q        | 5            | RL19_HUMAN           |
| P84098                                                          | 2             | 3.8659           | K.KLLADQAEAR.R                | 3            | RL19_HUMAN           |
| P84098                                                          | 3             | 6.1746           | K.KKVWLDPNETNEIANANSR.Q       | 2            | RL19_HUMAN           |
| P84098                                                          | 2             | 3.517            | K.LLADQAEAR.R                 | 2            | RL19_HUMAN           |
| P84098                                                          | 2             | 2.8619           | K.VWLDPNETNEIANANSR.Q         | 1            | RL19_HUMAN           |

| <i>Accession No*</i>                                            | <i>Charge</i> | <i>XC(Max)**</i> | <i>Peptide*</i>          | <i>TC***</i> | <i>Reference No*</i> |
|-----------------------------------------------------------------|---------------|------------------|--------------------------|--------------|----------------------|
| <b><i>60S ribosomal protein L22 - Homo sapiens (Human)</i></b>  |               |                  |                          |              |                      |
| P35268                                                          | 2             | 4.0305           | K.AGNLGGGVVTIER.S        | 4            | RL22_HUMAN           |
| P35268                                                          | 2             | 2.8225           | K.ITVTSEVPFSK.R          | 2            | RL22_HUMAN           |
| P35268                                                          | 2             | 3.8731           | R.VVANSKESYELR.Y         | 1            | RL22_HUMAN           |
| <b><i>60S ribosomal protein L23 - Homo sapiens (Human)</i></b>  |               |                  |                          |              |                      |
| P62829                                                          | 2             | 3.7785           | K.GSAITGPVAK.E           | 4            | RL23_HUMAN           |
| P62829                                                          | 1             | 2.2764           | R.IASNAGSIA.-            | 3            | RL23_HUMAN           |
| <b><i>60S ribosomal protein L23a - Homo sapiens (Human)</i></b> |               |                  |                          |              |                      |
| P62750                                                          | 2             | 2.7175           | K.FPLTTESAMK.K           | 1            | RL23A_HUMAN          |
| P62750                                                          | 2             | 3.8375           | R.LAPDYDALDVANKIGII.-    | 5            | RL23A_HUMAN          |
| P62750                                                          | 2             | 3.8114           | R.LAPDYDALDVANK.I        | 4            | RL23A_HUMAN          |
| P62750                                                          | 2             | 2.7094           | K.VNTLIRPDGEKK.A         | 1            | RL23A_HUMAN          |
| P62750                                                          | 1             | 2.8709           | K.LYDIDVAK.V             | 3            | RL23A_HUMAN          |
| P62750                                                          | 2             | 3.3299           | K.KLYDIDVAK.V            | 4            | RL23A_HUMAN          |
| P62750                                                          | 2             | 3.0231           | K.KEAPAPPK.A             | 2            | RL23A_HUMAN          |
| P62750                                                          | 2             | 4.309            | K.KEAPAPPKAEAK.A         | 10           | RL23A_HUMAN          |
| <b><i>60S ribosomal protein L24 - Homo sapiens (Human)</i></b>  |               |                  |                          |              |                      |
| P83731                                                          | 2             | 5.0274           | R.AITGASLADIM#AK.R       | 4            | RL24_HUMAN           |
| P83731                                                          | 2             | 4.9368           | R.AITGASLADIMAK.R        | 6            | RL24_HUMAN           |
| P83731                                                          | 2             | 4.0006           | R.AITGASLADIMAKR.N       | 1            | RL24_HUMAN           |
| <b><i>60S ribosomal protein L26 - Homo sapiens (Human)</i></b>  |               |                  |                          |              |                      |
| P61254                                                          | 1             | 2.3072           | K.YKEETIEK.M             | 1            | RL26_HUMAN           |
| P61254                                                          | 3             | 3.8526           | K.GKYKEETIEKM#QE.-       | 1            | RL26_HUMAN           |
| P61254                                                          | 3             | 3.9857           | K.GKYKEETIEK.M           | 4            | RL26_HUMAN           |
| P61254                                                          | 2             | 3.7247           | K.YKEETIEKM#QE.-         | 1            | RL26_HUMAN           |
| <b><i>60S ribosomal protein L27a - Homo sapiens (Human)</i></b> |               |                  |                          |              |                      |
| P46776                                                          | 2             | 3.2982           | K.LWTLVSEQTR.V           | 2            | RL27A_HUMAN          |
| P46776                                                          | 2             | 3.8804           | K.TGAAPIIDVVR.S          | 6            | RL27A_HUMAN          |
| P46776                                                          | 2             | 2.7369           | R.NQSFCTVNLDK.L          | 1            | RL27A_HUMAN          |
| <b><i>60S ribosomal protein L29 - Homo sapiens (Human)</i></b>  |               |                  |                          |              |                      |
| P47914                                                          | 2             | 5.1613           | K.AQAAAAPASVPAQAPK.R     | 7            | RL29_HUMAN           |
| P47914                                                          | 2             | 4.4321           | K.AQAAAAPASVPAQAPK.T     | 2            | RL29_HUMAN           |
| P47914                                                          | 2             | 3.0868           | K.DQTKAQAAAAPASVPAQAPK.R | 1            | RL29_HUMAN           |
| P47914                                                          | 2             | 2.8052           | R.SQRYESLK.G             | 1            | RL29_HUMAN           |
| <b><i>60S ribosomal protein L3 - Homo sapiens (Human)</i></b>   |               |                  |                          |              |                      |

| <i>Accession No*</i>                                                 | <i>Charge</i> | <i>XC(Max)**</i> | <i>Peptide*</i>        | <i>TC***</i> | <i>Reference No*</i> |
|----------------------------------------------------------------------|---------------|------------------|------------------------|--------------|----------------------|
| P39023                                                               | 2             | 3.0106           | R.HGSLGFLPR.K          | 1            | RL3_HUMAN            |
| <b><i>60S ribosomal protein L31 - Homo sapiens (Human)</i></b>       |               |                  |                        |              |                      |
| P62899                                                               | 1             | 2.8453           | K.NLQTVNVNVDEN.-       | 2            | RL31_HUMAN           |
| P62899                                                               | 2             | 3.421            | R.SAINEVVTR.E          | 4            | RL31_HUMAN           |
| <b><i>60S ribosomal protein L32 - Homo sapiens (Human)</i></b>       |               |                  |                        |              |                      |
| P62910                                                               | 2             | 2.7779           | K.GQILMPNIGYGSNK.K     | 1            | RL32_HUMAN           |
| <b><i>60S ribosomal protein L34 - Homo sapiens (Human)</i></b>       |               |                  |                        |              |                      |
| P49207                                                               | 2             | 3.1564           | R.AFLIEEQK.I           | 1            | RL34_HUMAN           |
| P49207                                                               | 2             | 2.7524           | R.RLSYNTASNK.T         | 1            | RL34_HUMAN           |
| <b><i>60S ribosomal protein L35 - Homo sapiens (Human)</i></b>       |               |                  |                        |              |                      |
| P42766                                                               | 1             | 2.1678           | K.KKEELLK.Q            | 1            | RL35_HUMAN           |
| P42766                                                               | 2             | 3.7014           | R.VLTVINQTQK.E         | 1            | RL35_HUMAN           |
| P42766                                                               | 2             | 4.4223           | R.VLTVINQTQKENLR.K     | 3            | RL35_HUMAN           |
| <b><i>60S ribosomal protein L35a - Homo sapiens (Human)</i></b>      |               |                  |                        |              |                      |
| P18077                                                               | 2             | 3.0774           | K.NNTVTPGGKPNK.T       | 2            | RL35A_HUMAN          |
| <b><i>60S ribosomal protein L36 - Homo sapiens (Human)</i></b>       |               |                  |                        |              |                      |
| Q9Y3U8                                                               | 3             | 4.0788           | R.KREELSNVLAAMR.K      | 4            | RL36_HUMAN           |
| Q9Y3U8                                                               | 2             | 4.4971           | K.REELSNVLAAMR.K       | 2            | RL36_HUMAN           |
| Q9Y3U8                                                               | 2             | 3.5738           | R.EELSNVLAAMR.K        | 2            | RL36_HUMAN           |
| <b><i>60S ribosomal protein L36a - Homo sapiens (Human)</i></b>      |               |                  |                        |              |                      |
| P83881                                                               | 1             | 2.428            | K.DSLYAQ GK.R          | 2            | RL36A_HUMAN          |
| P83881                                                               | 2             | 3.7493           | K.GKDSLYAQ GK.R        | 2            | RL36A_HUMAN          |
| <b><i>60S ribosomal protein L36a-like - Homo sapiens (Human)</i></b> |               |                  |                        |              |                      |
| Q969Q0                                                               | 1             | 2.3439           | K.DSLYAQ GR.R          | 2            | RL36L_HUMAN          |
| Q969Q0                                                               | 2             | 4.0672           | K.GKDSLYAQ GR.R        | 5            | RL36L_HUMAN          |
| <b><i>60S ribosomal protein L37a - Homo sapiens (Human)</i></b>      |               |                  |                        |              |                      |
| P61513                                                               | 2             | 2.8343           | K.KIEISQHAK.Y          | 2            | RL37A_HUMAN          |
| P61513                                                               | 2             | 3.9107           | K.TVAGGAWTYNTTSAVTVK.S | 2            | RL37A_HUMAN          |
| <b><i>60S ribosomal protein L38 - Homo sapiens (Human)</i></b>       |               |                  |                        |              |                      |
| P63173                                                               | 2             | 4.2019           | K.IEEIKDFLLTAR.R       | 7            | RL38_HUMAN           |
| P63173                                                               | 2             | 4.1761           | R.YLYTLVITDKEK.A       | 3            | RL38_HUMAN           |
| P63173                                                               | 2             | 3.2113           | K.LKQSLPPGLAVK.E       | 3            | RL38_HUMAN           |
| P63173                                                               | 2             | 5.7097           | R.KIEEIKDFLLTAR.R      | 12           | RL38_HUMAN           |
| <b><i>60S ribosomal protein L4 - Homo sapiens (Human)</i></b>        |               |                  |                        |              |                      |
| P36578                                                               | 1             | 5.2782           | K.AAAAAALQAK.S         | 4            | RL4_HUMAN            |

| <i>Accession No*</i>                                                          | <i>Charge</i> | <i>XC(Max)**</i> | <i>Peptide*</i>                   | <i>TC***</i> | <i>Reference No*</i> |
|-------------------------------------------------------------------------------|---------------|------------------|-----------------------------------|--------------|----------------------|
| P36578                                                                        | 3             | 4.7738           | K.APIRPDIVNFVHTNLR.K              | 2            | RL4_HUMAN            |
| P36578                                                                        | 3             | 5.1963           | R.VDKAAAAAALQAK.S                 | 3            | RL4_HUMAN            |
| <b><i>60S ribosomal protein L5 - Homo sapiens (Human)</i></b>                 |               |                  |                                   |              |                      |
| P46777                                                                        | 2             | 3.1191           | K.RFPGYDSESK.E                    | 1            | RL5_HUMAN            |
| P46777                                                                        | 2             | 2.9751           | K.NSVTPDMMEEMYKK.A                | 1            | RL5_HUMAN            |
| P46777                                                                        | 2             | 3.5234           | R.YLMEEDEDAYKK.Q                  | 2            | RL5_HUMAN            |
| P46777                                                                        | 2             | 4.2205           | K.HIMGQNVADYMR.Y                  | 3            | RL5_HUMAN            |
| P46777                                                                        | 2             | 3.6949           | K.GAVDGGLSIPHSTK.R                | 2            | RL5_HUMAN            |
| P46777                                                                        | 2             | 3.3185           | K.HIM#GQNVADYMR.Y                 | 2            | RL5_HUMAN            |
| P46777                                                                        | 2             | 3.2501           | R.YLM#EEDEDAYKK.Q                 | 1            | RL5_HUMAN            |
| <b><i>60S ribosomal protein L8 - Homo sapiens (Human)</i></b>                 |               |                  |                                   |              |                      |
| P62917                                                                        | 2             | 3.4997           | K.GIVKDIHDPGR.G                   | 1            | RL8_HUMAN            |
| P62917                                                                        | 2             | 5.4874           | R.ASGNYATVISHNPETK.K              | 3            | RL8_HUMAN            |
| P62917                                                                        | 2             | 4.3113           | R.AVVGVVAGGGR.I                   | 5            | RL8_HUMAN            |
| <b><i>60S ribosomal protein L9 - Homo sapiens (Human)</i></b>                 |               |                  |                                   |              |                      |
| P32969                                                                        | 2             | 4.8703           | K.TILSNQTVDIPENVDTLK.G            | 3            | RL9_HUMAN            |
| P32969                                                                        | 1             | 2.5033           | K.GTVQQADE.-                      | 8            | RL9_HUMAN            |
| <b><i>A kinase - Homo sapiens (Human)</i></b>                                 |               |                  |                                   |              |                      |
| Q5T721                                                                        | 3             | 5.1998           | R.AAGVGWENVLLKEGESASNATETSGPDMTIK | 1            | Q5T721_HUMAN         |
| Q5T721                                                                        | 2             | 4.7052           | K.KPPQLSEDDIWLK.S                 | 2            | Q5T721_HUMAN         |
| Q5T721                                                                        | 2             | 3.2954           | R.AAGVGWENVLLK.E                  | 3            | Q5T721_HUMAN         |
| <b><i>Abhydrolase domain-containing protein 12 - Homo sapiens (Human)</i></b> |               |                  |                                   |              |                      |
| Q8N2K0                                                                        | 3             | 4.3517           | K.RTEPVALEHER.C                   | 2            | ABD12_HUMAN          |
| <b><i>ABI gene family member 3 - Homo sapiens (Human)</i></b>                 |               |                  |                                   |              |                      |
| Q9P2A4                                                                        | 2             | 2.7748           | K.VVTLYPYTSQK.D                   | 1            | ABI3_HUMAN           |
| Q9P2A4                                                                        | 3             | 4.4277           | R.IPEPVHLPVVPDGR.L                | 2            | ABI3_HUMAN           |
| Q9P2A4                                                                        | 3             | 5.3855           | R.LSAASSASSLASAGSAEGVGGAPTPK.G    | 2            | ABI3_HUMAN           |
| <b><i>Abl interactor 1 - Homo sapiens (Human)</i></b>                         |               |                  |                                   |              |                      |
| Q8IZP0                                                                        | 3             | 5.9641           | R.KPIDYTVLDDVGHGVK.W              | 2            | ABI1_HUMAN           |
| Q8IZP0                                                                        | 2             | 2.7427           | R.VTGLFPGNYVESIMHYTD.-            | 1            | ABI1_HUMAN           |
| Q8IZP0                                                                        | 2             | 3.8585           | R.HNSTTSSTSSGGYRR.T               | 2            | ABI1_HUMAN           |
| Q8IZP0                                                                        | 2             | 4.1746           | R.HNSTTSSTSSGGYR.R                | 2            | ABI1_HUMAN           |
| Q8IZP0                                                                        | 2             | 2.8735           | R.ALIESYQNLTR.V                   | 1            | ABI1_HUMAN           |
| Q8IZP0                                                                        | 3             | 4.1802           | K.TLEPVKPPTVPNDYMTSPAR.L          | 2            | ABI1_HUMAN           |
| Q8IZP0                                                                        | 2             | 3.1874           | R.LGSQHSPGR.T                     | 2            | ABI1_HUMAN           |

| <i>Accession No*</i>                                                                               | <i>Charge</i> | <i>XC(Max)**</i> | <i>Peptide*</i>               | <i>TC***</i> | <i>Reference No*</i> |
|----------------------------------------------------------------------------------------------------|---------------|------------------|-------------------------------|--------------|----------------------|
| <b><i>Abl interactor 2 - Homo sapiens (Human)</i></b>                                              |               |                  |                               |              |                      |
| Q9NYB9                                                                                             | 3             | 5.6067           | R.KPIDYTILDDIGHGVK.W          | 3            | ABI2_HUMAN           |
| Q9NYB9                                                                                             | 2             | 2.7706           | R.NM#APSQQSPVR.T              | 1            | ABI2_HUMAN           |
| Q9NYB9                                                                                             | 2             | 2.8858           | R.NMAPSQQSPVR.T               | 1            | ABI2_HUMAN           |
| <b><i>Abnormal spindle-like microcephaly-associated protein - Homo sapiens (Human)</i></b>         |               |                  |                               |              |                      |
| Q8IZT6                                                                                             | 1             | 2.3243           | K.EEIAFLK.H                   | 1            | ASPM_HUMAN           |
| <b><i>Absent in melanoma 1 protein - Homo sapiens (Human)</i></b>                                  |               |                  |                               |              |                      |
| Q9Y4K1                                                                                             | 2             | 4.0246           | K.GTAAESGEEAAR.A              | 3            | AIM1_HUMAN           |
| Q9Y4K1                                                                                             | 2             | 6.4446           | R.SFVLPVESTQDVSSQVIPESSEVR.E  | 4            | AIM1_HUMAN           |
| Q9Y4K1                                                                                             | 2             | 4.1225           | R.AALDGGVASAASPESKPSPGTK.G    | 1            | AIM1_HUMAN           |
| Q9Y4K1                                                                                             | 2             | 3.5014           | K.VTVSEEEILPATR.G             | 2            | AIM1_HUMAN           |
| Q9Y4K1                                                                                             | 2             | 3.5505           | K.TLPIQAQSQGSR.T              | 4            | AIM1_HUMAN           |
| Q9Y4K1                                                                                             | 2             | 4.6137           | K.SLVLENTVDTAQDIPTTVDTK.D     | 6            | AIM1_HUMAN           |
| Q9Y4K1                                                                                             | 2             | 3.6314           | K.SGPQVIPPASEK.T              | 2            | AIM1_HUMAN           |
| Q9Y4K1                                                                                             | 2             | 3.8795           | K.LLEKEDSEAADSK.S             | 3            | AIM1_HUMAN           |
| Q9Y4K1                                                                                             | 1             | 2.6071           | K.ETAJETK.V                   | 2            | AIM1_HUMAN           |
| Q9Y4K1                                                                                             | 2             | 2.8634           | K.RASAEQSVLFK.S               | 2            | AIM1_HUMAN           |
| <b><i>Acidic leucine-rich nuclear phosphoprotein 32 family member A - Homo sapiens (Human)</i></b> |               |                  |                               |              |                      |
| P39687                                                                                             | 2             | 4.08             | R.KREPEDEGEDDD.-              | 50           | AN32A_HUMAN          |
| P39687                                                                                             | 2             | 3.3231           | K.REPEDEGEDDD.-               | 2            | AN32A_HUMAN          |
| <b><i>Acidic leucine-rich nuclear phosphoprotein 32 family member B - Homo sapiens (Human)</i></b> |               |                  |                               |              |                      |
| Q92688                                                                                             | 2             | 2.8082           | R.IFGGLDMLAEK.L               | 2            | AN32B_HUMAN          |
| Q92688                                                                                             | 2             | 2.729            | K.KLELSENR.I                  | 1            | AN32B_HUMAN          |
| Q92688                                                                                             | 3             | 4.2163           | R.IFGGLDM#LAEKLPNLTHLNLSGNK.L | 1            | AN32B_HUMAN          |
| <b><i>Acidic leucine-rich nuclear phosphoprotein 32 family member C - Homo sapiens (Human)</i></b> |               |                  |                               |              |                      |
| O43423                                                                                             | 3             | 3.8504           | K.IKDLSTIEPLKQLENLK.S         | 1            | AN32C_HUMAN          |
| <b><i>Actin filament-associated protein 1-like 1 - Homo sapiens (Human)</i></b>                    |               |                  |                               |              |                      |
| Q8TED9                                                                                             | 2             | 3.1354           | R.SPSIVASNQGR.V               | 2            | AF1L1_HUMAN          |
| <b><i>Actin filament-associated protein 1-like 2 - Homo sapiens (Human)</i></b>                    |               |                  |                               |              |                      |
| Q8N4X5                                                                                             | 3             | 3.9104           | K.AVTPASAPDCTPVNSATTLK.N      | 2            | AF1L2_HUMAN          |
| Q8N4X5                                                                                             | 2             | 2.8079           | K.NRTEAEVKR.Y                 | 1            | AF1L2_HUMAN          |
| Q8N4X5                                                                                             | 3             | 3.773            | K.YLSASEYGSSVDGHPEVPETK.D     | 1            | AF1L2_HUMAN          |
| Q8N4X5                                                                                             | 2             | 2.9108           | R.YTEEKERLEK.K                | 1            | AF1L2_HUMAN          |
| <b><i>Actin-bundling protein with BAIAP2 homology - Homo sapiens (Human)</i></b>                   |               |                  |                               |              |                      |
| Q765P7                                                                                             | 2             | 3.3122           | K.HGEEVSPAASDLAMVLTR.G        | 1            | Q765P7_HUMAN         |

| <i>Accession No*</i>                                                                             | <i>Charge</i> | <i>XC(Max)**</i> | <i>Peptide*</i>                  | <i>TC***</i> | <i>Reference No*</i> |
|--------------------------------------------------------------------------------------------------|---------------|------------------|----------------------------------|--------------|----------------------|
| Q765P7                                                                                           | 3             | 4.7132           | R.VELLRDTEPGPASGGTLGSPGEEAPRPR.M | 1            | Q765P7_HUMAN         |
| Q765P7                                                                                           | 3             | 4.0343           | K.VGSHEQPSGATLQR.R               | 3            | Q765P7_HUMAN         |
| Q765P7                                                                                           | 2             | 2.7976           | R.NSNIAQNYR.R                    | 2            | Q765P7_HUMAN         |
| <b><i>Actin-related protein 2/3 complex subunit 1A - Homo sapiens (Human)</i></b>                |               |                  |                                  |              |                      |
| Q92747                                                                                           | 2             | 3.8637           | K.TLESSIQGLR.I                   | 3            | ARC1A_HUMAN          |
| <b><i>Actin-related protein 2/3 complex subunit 1B - Homo sapiens (Human)</i></b>                |               |                  |                                  |              |                      |
| O15143                                                                                           | 2             | 5.4343           | K.ASSEGTAAGAGLDSLHK.N            | 3            | ARC1B_HUMAN          |
| O15143                                                                                           | 3             | 6.3371           | K.KASSEGTAAGAGLDSLHK.N           | 2            | ARC1B_HUMAN          |
| O15143                                                                                           | 2             | 4.574            | K.NSVSQISVLSGGK.A                | 3            | ARC1B_HUMAN          |
| O15143                                                                                           | 2             | 2.9549           | K.SLESALKDLK.I                   | 2            | ARC1B_HUMAN          |
| <b><i>Actin-related protein 2/3 complex subunit 3 - Homo sapiens (Human)</i></b>                 |               |                  |                                  |              |                      |
| O15145                                                                                           | 2             | 3.2409           | K.LIGNMALLPIR.S                  | 2            | ARPC3_HUMAN          |
| O15145                                                                                           | 2             | 3.5553           | K.LIGNM#ALLPIR.S                 | 2            | ARPC3_HUMAN          |
| <b><i>Actin-related protein 2/3 complex subunit 5 - Homo sapiens (Human)</i></b>                 |               |                  |                                  |              |                      |
| O15511                                                                                           | 2             | 3.6813           | K.ALAAGGVGSIVR.V                 | 2            | ARPC5_HUMAN          |
| <b><i>Activated RNA polymerase II transcriptional coactivator p15 - Homo sapiens (Human)</i></b> |               |                  |                                  |              |                      |
| P53999                                                                                           | 2             | 3.5826           | K.ELVSSSSGSDSDSEVDK.K            | 1            | TCP4_HUMAN           |
| P53999                                                                                           | 3             | 3.7872           | K.GISLNPEQWSQLKEQISDIDDAVR.K     | 1            | TCP4_HUMAN           |
| P53999                                                                                           | 2             | 2.7814           | K.KQVAPEKPVK.K                   | 1            | TCP4_HUMAN           |
| P53999                                                                                           | 2             | 2.8527           | K.QSSSRDDNMFQIGK.M               | 1            | TCP4_HUMAN           |
| P53999                                                                                           | 2             | 2.7975           | R.DDNM#FQIGK.M                   | 1            | TCP4_HUMAN           |
| P53999                                                                                           | 2             | 2.9967           | R.DDNMFQIGK.M                    | 3            | TCP4_HUMAN           |
| P53999                                                                                           | 3             | 7.3197           | R.KGISLNPEQWSQLKEQISDIDDAVR.K    | 2            | TCP4_HUMAN           |
| <b><i>Activating signal cointegrator 1 complex subunit 2 - Homo sapiens (Human)</i></b>          |               |                  |                                  |              |                      |
| Q9H118                                                                                           | 2             | 4.0673           | R.HDSSTAVAGSPR.G                 | 2            | ASCC2_HUMAN          |
| <b><i>Activity-dependent neuroprotector - Homo sapiens (Human)</i></b>                           |               |                  |                                  |              |                      |
| Q9H2P0                                                                                           | 2             | 3.4768           | K.SVGQGYSVGQSMR.L                | 1            | ADNP_HUMAN           |
| Q9H2P0                                                                                           | 2             | 3.1194           | R.IGSLASGNVR.S                   | 2            | ADNP_HUMAN           |
| <b><i>Acyl carrier protein, mitochondrial precursor - Homo sapiens (Human)</i></b>               |               |                  |                                  |              |                      |
| O14561                                                                                           | 2             | 3.1157           | K.LSVNSHFMK.D                    | 2            | ACPM_HUMAN           |
| O14561                                                                                           | 2             | 2.7053           | K.LYDKIDPEK.L                    | 1            | ACPM_HUMAN           |
| O14561                                                                                           | 3             | 5.2272           | K.LYDKIDPEKLSVNSHFM#K.D          | 4            | ACPM_HUMAN           |
| O14561                                                                                           | 3             | 5.0802           | K.LYDKIDPEKLSVNSHFMK.D           | 5            | ACPM_HUMAN           |
| O14561                                                                                           | 1             | 2.2559           | R.VLYVLK.L                       | 2            | ACPM_HUMAN           |
| <b><i>Acyl-CoA synthetase medium-chain family member 3 - Homo sapiens (Human)</i></b>            |               |                  |                                  |              |                      |

| <i>Accession No*</i>                                                               | <i>Charge</i> | <i>XC(Max)**</i> | <i>Peptide*</i>              | <i>TC***</i> | <i>Reference No*</i> |
|------------------------------------------------------------------------------------|---------------|------------------|------------------------------|--------------|----------------------|
| Q53FZ2                                                                             | 2             | 2.7399           | R.KVEFIQELPK.T               | 1            | Q53FZ2_HUMAN         |
| <b><i>Acylphosphatase-1 - Homo sapiens (Human)</i></b>                             |               |                  |                              |              |                      |
| P07311                                                                             | 2             | 3.4977           | K.LGLVGWVQNTDR.G             | 2            | ACYP1_HUMAN          |
| <b><i>Acylphosphatase-2 - Homo sapiens (Human)</i></b>                             |               |                  |                              |              |                      |
| P14621                                                                             | 2             | 2.8391           | K.LEYSNFSIRY.-               | 1            | ACYP2_HUMAN          |
| <b><i>Adaptin ear-binding coat-associated protein 1 - Homo sapiens (Human)</i></b> |               |                  |                              |              |                      |
| Q8NC96                                                                             | 2             | 3.7212           | R.GGGLSLLPPPPGGK.V           | 2            | NECP1_HUMAN          |
| <b><i>Adaptor protein HOF1 - Homo sapiens (Human)</i></b>                          |               |                  |                              |              |                      |
| A1X283                                                                             | 2             | 5.4918           | K.SLLDGEQPQAVGGQDVAFSR.S     | 2            | A1X283_HUMAN         |
| A1X283                                                                             | 3             | 5.7375           | K.SQDKSLLDGEQPQAVGGQDVAFSR.S | 3            | A1X283_HUMAN         |
| A1X283                                                                             | 3             | 4.4183           | K.SKTDLPPEEKPDATPQNPFLLK.S   | 1            | A1X283_HUMAN         |
| <b><i>Adenomatous polyposis coli protein - Homo sapiens (Human)</i></b>            |               |                  |                              |              |                      |
| P25054                                                                             | 3             | 4.9083           | K.VTSHTELTSNQQSANK.T         | 1            | APC_HUMAN            |
| P25054                                                                             | 2             | 3.3663           | R.LQGSSLSSESAR.H             | 2            | APC_HUMAN            |
| P25054                                                                             | 2             | 2.8621           | R.SPTGNTPPVIDSVSEK.A         | 1            | APC_HUMAN            |
| <b><i>Adenylate cyclase type 9 - Homo sapiens (Human)</i></b>                      |               |                  |                              |              |                      |
| O60503                                                                             | 2             | 2.9303           | K.TSLGSDSSTQAK.D             | 2            | ADCY9_HUMAN          |
| <b><i>Adenylate kinase isoenzyme 2, mitochondrial - Homo sapiens (Human)</i></b>   |               |                  |                              |              |                      |
| P54819                                                                             | 3             | 4.1008           | R.LQAYHTQTTPLIEYYR.K         | 1            | KAD2_HUMAN           |
| P54819                                                                             | 2             | 4.4091           | K.LVSDEMVELIEK.N             | 2            | KAD2_HUMAN           |
| P54819                                                                             | 2             | 3.0221           | R.AVLLGPPGAGK.G              | 2            | KAD2_HUMAN           |
| <b><i>Adenylosuccinate synthetase isozyme 1 - Homo sapiens (Human)</i></b>         |               |                  |                              |              |                      |
| Q8N142                                                                             | 2             | 4.713            | R.GRLQQEAAATGSR.V            | 1            | PURA1_HUMAN          |
| Q8N142                                                                             | 2             | 3.2867           | R.LQQEAAATGSR.V              | 1            | PURA1_HUMAN          |
| <b><i>Adipophilin - Homo sapiens (Human)</i></b>                                   |               |                  |                              |              |                      |
| Q99541                                                                             | 2             | 5.138            | K.KVEGFDLVQKPSYYVR.L         | 4            | ADFP_HUMAN           |
| Q99541                                                                             | 2             | 4.848            | K.SELLVEQYLPLTEEELEK.E       | 2            | ADFP_HUMAN           |
| Q99541                                                                             | 2             | 4.796            | K.SVVSIGSINTVLGSR.M          | 4            | ADFP_HUMAN           |
| Q99541                                                                             | 2             | 3.1417           | R.MMQLVSSGVENALTK.S          | 2            | ADFP_HUMAN           |
| Q99541                                                                             | 2             | 4.5007           | K.DSVASTITGVMDK.T            | 8            | ADFP_HUMAN           |
| Q99541                                                                             | 2             | 3.9514           | K.DSVASTITGVM#DK.T           | 3            | ADFP_HUMAN           |
| Q99541                                                                             | 2             | 3.5935           | K.DAVTTTGTGAK.D              | 5            | ADFP_HUMAN           |
| Q99541                                                                             | 2             | 3.1475           | K.TKGAVTGSVEK.T              | 4            | ADFP_HUMAN           |
| Q99541                                                                             | 1             | 2.9607           | K.GAVTGSVEK.T                | 5            | ADFP_HUMAN           |
| <b><i>Adipose most abundant gene transcript 2 - Homo sapiens (Human)</i></b>       |               |                  |                              |              |                      |



| <i>Accession No*</i>                                                                     | <i>Charge</i> | <i>XC(Max)**</i> | <i>Peptide*</i>                | <i>TC***</i> | <i>Reference No*</i> |
|------------------------------------------------------------------------------------------|---------------|------------------|--------------------------------|--------------|----------------------|
| Q15847                                                                                   | 3             | 5.4645           | K.QQVEGTAQEAVSAAGAAQVVDQATEAGQ | 6            | APM2_HUMAN           |
| Q15847                                                                                   | 1             | 3.8238           | K.TANQASDTFSGIGK.K             | 8            | APM2_HUMAN           |
| Q15847                                                                                   | 2             | 3.7998           | K.TANQASDTFSGIGKK.F            | 1            | APM2_HUMAN           |
| Q15847                                                                                   | 2             | 6.4666           | K.TTQETIDKTANQASDTFSGIGK.K     | 22           | APM2_HUMAN           |
| Q15847                                                                                   | 3             | 6.5175           | K.TTQETIDKTANQASDTFSGIGKK.F    | 18           | APM2_HUMAN           |
| <b><i>Adipose specific 2 - Homo sapiens (Human)</i></b>                                  |               |                  |                                |              |                      |
| Q5TBU2                                                                                   | 2             | 3.4831           | K.TTQETIDKTAN.-                | 5            | Q5TBU2_HUMA          |
| <b><i>ADM precursor [Contains: Adrenomedullin - Homo sapiens (Human)]</i></b>            |               |                  |                                |              |                      |
| P35318                                                                                   | 2             | 4.2788           | R.SPEDSSPDAAR.I                | 4            | ADML_HUMAN           |
| <b><i>ADP-ribose pyrophosphatase, mitochondrial precursor - Homo sapiens (Human)</i></b> |               |                  |                                |              |                      |
| Q9BW91                                                                                   | 2             | 3.4396           | R.EFGEEALNSLQK.T               | 2            | NUDT9_HUMAN          |
| Q9BW91                                                                                   | 2             | 4.4881           | R.WADPQISESNFSPK.F             | 3            | NUDT9_HUMAN          |
| Q9BW91                                                                                   | 3             | 3.9342           | R.WGNHAADPIITR.W               | 1            | NUDT9_HUMAN          |
| Q9BW91                                                                                   | 2             | 3.7012           | K.LFSQDHLVIYK.G                | 1            | NUDT9_HUMAN          |
| <b><i>ADP-ribosylation factor GTPase-activating protein 1 - Homo sapiens (Human)</i></b> |               |                  |                                |              |                      |
| Q8N6T3                                                                                   | 2             | 4.724            | K.IFDDVSSGVSQLASK.V            | 3            | ARFG1_HUMAN          |
| <b><i>ADP-ribosylation factor GTPase-activating protein 3 - Homo sapiens (Human)</i></b> |               |                  |                                |              |                      |
| Q9NP61                                                                                   | 2             | 3.7783           | R.LAYKDLEIQMK.K                | 2            | ARFG3_HUMAN          |
| Q9NP61                                                                                   | 3             | 7.1004           | R.SVISHSVTSDMQTIEQESPIMAKPR.K  | 1            | ARFG3_HUMAN          |
| Q9NP61                                                                                   | 3             | 5.1519           | R.SVISHSVTSDMQTIEQESPIM#AKPR.K | 2            | ARFG3_HUMAN          |
| Q9NP61                                                                                   | 2             | 3.1343           | R.SSSFSSWDDSSDSYWKK.E          | 1            | ARFG3_HUMAN          |
| Q9NP61                                                                                   | 2             | 2.9065           | K.ETSKDTETVLK.T                | 2            | ARFG3_HUMAN          |
| Q9NP61                                                                                   | 3             | 3.9238           | K.QAQAADKMKEQEDLAK.V           | 1            | ARFG3_HUMAN          |
| Q9NP61                                                                                   | 2             | 2.8209           | K.LANTCFNEIEK.Q                | 1            | ARFG3_HUMAN          |
| Q9NP61                                                                                   | 2             | 3.1644           | K.MKEQEDLAK.V                  | 2            | ARFG3_HUMAN          |
| Q9NP61                                                                                   | 2             | 2.9993           | K.AISSDMYFGR.Q                 | 2            | ARFG3_HUMAN          |
| Q9NP61                                                                                   | 2             | 3.853            | K.VVSKEESIVSSLR.L              | 6            | ARFG3_HUMAN          |
| <b><i>ADP-ribosylation factor-like protein 3 - Homo sapiens (Human)</i></b>              |               |                  |                                |              |                      |
| P36405                                                                                   | 2             | 2.8156           | R.ILLLGLDNAGK.T                | 2            | ARL3_HUMAN           |
| <b><i>ADP-sugar pyrophosphatase - Homo sapiens (Human)</i></b>                           |               |                  |                                |              |                      |
| Q9UUK9                                                                                   | 2             | 2.901            | K.EQTADGVAVIPVLRQ.T            | 1            | NUDT5_HUMAN          |
| <b><i>Adrenodoxin, mitochondrial precursor - Homo sapiens (Human)</i></b>                |               |                  |                                |              |                      |
| P10109                                                                                   | 2             | 3.0831           | R.DGETLTTK.G                   | 1            | ADX_HUMAN            |
| P10109                                                                                   | 1             | 2.7028           | R.VPETVADAR.Q                  | 3            | ADX_HUMAN            |
| P10109                                                                                   | 2             | 4.1881           | K.SMDNMTVRVPETVADAR.Q          | 2            | ADX_HUMAN            |

| <i>Accession No*</i>                                                 | <i>Charge</i> | <i>XC(Max)**</i> | <i>Peptide*</i>                | <i>TC***</i> | <i>Reference No*</i> |
|----------------------------------------------------------------------|---------------|------------------|--------------------------------|--------------|----------------------|
| P10109                                                               | 2             | 2.7304           | K.SMDNMTVR.V                   | 1            | ADX_HUMAN            |
| <b><i>AF4/FMR2 family member 4 - Homo sapiens (Human)</i></b>        |               |                  |                                |              |                      |
| Q9UHB7                                                               | 2             | 2.806            | K.SPAQSDSTTQR.R                | 1            | AFF4_HUMAN           |
| Q9UHB7                                                               | 2             | 3.5484           | R.EQGTGNSYTDTSQPK.E            | 1            | AFF4_HUMAN           |
| Q9UHB7                                                               | 2             | 4.6499           | R.GGLKIESETPVDLASSMPSSR.H      | 1            | AFF4_HUMAN           |
| Q9UHB7                                                               | 2             | 2.9652           | K.IDLNLTR.I                    | 2            | AFF4_HUMAN           |
| <b><i>Afadin - Homo sapiens (Human)</i></b>                          |               |                  |                                |              |                      |
| P55196                                                               | 2             | 3.8192           | K.TQVLSPLSLFTAK.F              | 3            | AFAD_HUMAN           |
| P55196                                                               | 3             | 4.1623           | R.DYEPPSPSPAPGAPPPPPQR.N       | 4            | AFAD_HUMAN           |
| <b><i>Afamin precursor - Homo sapiens (Human)</i></b>                |               |                  |                                |              |                      |
| P43652                                                               | 2             | 4.7654           | K.IAPQLSTEELVSLGEK.M           | 2            | AFAM_HUMAN           |
| <b><i>Aftiphilin - Homo sapiens (Human)</i></b>                      |               |                  |                                |              |                      |
| Q6ULP2                                                               | 3             | 4.0743           | K.EEFVPSNHFMPIHEFSENVDSLTSFK.S | 1            | AFTIN_HUMAN          |
| Q6ULP2                                                               | 2             | 4.2883           | R.TNMNVVHQNK.Q                 | 3            | AFTIN_HUMAN          |
| Q6ULP2                                                               | 3             | 5.3487           | R.KFTNFQSPNIDPTEENDLDDSLSVK.N  | 2            | AFTIN_HUMAN          |
| Q6ULP2                                                               | 2             | 3.1837           | K.QGLPTLQQDEFLQSGVQSK.A        | 1            | AFTIN_HUMAN          |
| Q6ULP2                                                               | 2             | 3.5653           | K.TEEKLDLLTSK.C                | 2            | AFTIN_HUMAN          |
| Q6ULP2                                                               | 2             | 3.3968           | K.TSDDEVGSPK.E                 | 1            | AFTIN_HUMAN          |
| <b><i>Aggrecan core protein precursor - Homo sapiens (Human)</i></b> |               |                  |                                |              |                      |
| P16112                                                               | 2             | 3.8252           | R.TPCVGDKDSSPGVR.T             | 2            | PGCA_HUMAN           |
| P16112                                                               | 2             | 3.0688           | R.VNSAYQDK.V                   | 1            | PGCA_HUMAN           |
| P16112                                                               | 2             | 2.7987           | R.AISTRYTLDFDR.A               | 1            | PGCA_HUMAN           |
| P16112                                                               | 3             | 3.7293           | K.VSLPNYPAIPSDATLEVQSLR.S      | 1            | PGCA_HUMAN           |
| P16112                                                               | 2             | 2.9725           | K.GTVACGEPPVVEHAR.T            | 1            | PGCA_HUMAN           |
| P16112                                                               | 2             | 3.4612           | K.FTFQEAAANEQR.R               | 4            | PGCA_HUMAN           |
| P16112                                                               | 2             | 3.0316           | K.DRYEINSLVR.Y                 | 2            | PGCA_HUMAN           |
| P16112                                                               | 2             | 3.2056           | R.YQCTEGFVQR.H                 | 4            | PGCA_HUMAN           |
| <b><i>Agrin precursor - Homo sapiens (Human)</i></b>                 |               |                  |                                |              |                      |
| O00468                                                               | 2             | 3.15             | R.SFLAFPTLR.A                  | 2            | AGRIN_HUMAN          |
| O00468                                                               | 2             | 2.7985           | K.VLGAPVPAFEGR.S               | 1            | AGRIN_HUMAN          |
| O00468                                                               | 1             | 2.3823           | R.FNAVCLSR.R                   | 2            | AGRIN_HUMAN          |
| O00468                                                               | 3             | 3.8078           | R.RPEMLLRPESEPAR.Q             | 1            | AGRIN_HUMAN          |
| O00468                                                               | 2             | 3.2142           | R.SADGLTASCLCPATCR.G           | 1            | AGRIN_HUMAN          |
| <b><i>AHNAK protein - Homo sapiens (Human)</i></b>                   |               |                  |                                |              |                      |
| Q9BVU3                                                               | 2             | 3.44             | R.SPEPGQWTR.E                  | 4            | Q9BVU3_HUMA          |

| <i>Accession No*</i>                                                       | <i>Charge</i> | <i>XC(Max)**</i> | <i>Peptide*</i>                   | <i>TC***</i> | <i>Reference No*</i> |
|----------------------------------------------------------------------------|---------------|------------------|-----------------------------------|--------------|----------------------|
| Q9BVU3                                                                     | 2             | 4.0122           | R.ELLLPNWQGSGLTIAQR.D             | 1            | Q9BVU3_HUMA          |
| Q9BVU3                                                                     | 2             | 4.6319           | R.DDGVFVQEVTQNSPAAR.T             | 12           | Q9BVU3_HUMA          |
| Q9BVU3                                                                     | 2             | 3.3952           | K.QKEASSQAGAVSVSTPNAGL.-          | 1            | Q9BVU3_HUMA          |
| <b><i>AHNAK2 protein - Homo sapiens (Human)</i></b>                        |               |                  |                                   |              |                      |
| Q5BKX7                                                                     | 2             | 2.9981           | K.ADDESKGSGGLPNEG.-               | 2            | Q5BKX7_HUMA          |
| Q5BKX7                                                                     | 2             | 3.0144           | K.HDLSTEGDSR.G                    | 1            | Q5BKX7_HUMA          |
| Q5BKX7                                                                     | 2             | 2.8335           | R.DVDPSLSSATAGGSFQDTEK.A          | 1            | Q5BKX7_HUMA          |
| <b><i>A-kinase anchor protein 13 - Homo sapiens (Human)</i></b>            |               |                  |                                   |              |                      |
| Q12802                                                                     | 3             | 4.0443           | K.SSPICSTTGDDKLCADSACQQNTVTSSGDLV | 1            | AKP13_HUMAN          |
| Q12802                                                                     | 2             | 2.9777           | R.IVDAVIEQVK.A                    | 1            | AKP13_HUMAN          |
| Q12802                                                                     | 2             | 3.5684           | K.NAASDAEMNHR.S                   | 2            | AKP13_HUMAN          |
| Q12802                                                                     | 2             | 3.4837           | K.GADLIEEAASR.I                   | 1            | AKP13_HUMAN          |
| Q12802                                                                     | 2             | 5.6323           | K.ALQLSNSPGASSAFLK.A              | 3            | AKP13_HUMAN          |
| Q12802                                                                     | 3             | 4.4667           | R.SREESADAPVDQNSVVIPAAAK.D        | 2            | AKP13_HUMAN          |
| <b><i>A-kinase anchor protein 4 precursor - Homo sapiens (Human)</i></b>   |               |                  |                                   |              |                      |
| Q5JQC9                                                                     | 3             | 3.8476           | K.SLTSAEKVGEHILKEGLTIWNQK.Q       | 2            | AKAP4_HUMAN          |
| <b><i>A-kinase anchor protein 8 - Homo sapiens (Human)</i></b>             |               |                  |                                   |              |                      |
| O43823                                                                     | 2             | 3.5401           | R.GGSGGGGEGIQDR.E                 | 2            | AKAP8_HUMAN          |
| <b><i>Alcohol dehydrogenase [NADP+] - Homo sapiens (Human)</i></b>         |               |                  |                                   |              |                      |
| P14550                                                                     | 2             | 2.8562           | R.DAGHPLYPFNDPY.-                 | 1            | AK1A1_HUMAN          |
| <b><i>Alpha-1-acid glycoprotein 1 precursor - Homo sapiens (Human)</i></b> |               |                  |                                   |              |                      |
| P02763                                                                     | 2             | 3.3209           | K.SDVVYTDWKKDK.C                  | 2            | A1AG1_HUMAN          |
| P02763                                                                     | 2             | 5.3711           | R.YVGGQEHAHLLILR.D                | 12           | A1AG1_HUMAN          |
| P02763                                                                     | 2             | 3.3009           | R.YVGGQEHAHLLILRDTK.T             | 2            | A1AG1_HUMAN          |
| P02763                                                                     | 3             | 3.9769           | K.TYM#LAFDVNDEKNWGLSVYADKPETTK.E  | 1            | A1AG1_HUMAN          |
| P02763                                                                     | 2             | 3.3004           | K.SDVVYTDWK.K                     | 10           | A1AG1_HUMAN          |
| P02763                                                                     | 2             | 4.4517           | K.EQLGEFYEALDCLR.I                | 10           | A1AG1_HUMAN          |
| P02763                                                                     | 3             | 5.4075           | K.TYMLAFDVNDEKNWGLSVYADKPETTK.E   | 2            | A1AG1_HUMAN          |
| P02763                                                                     | 1             | 3.584            | K.SDVVYTDWKK.D                    | 8            | A1AG1_HUMAN          |
| <b><i>Alpha-1-acid glycoprotein 2 precursor - Homo sapiens (Human)</i></b> |               |                  |                                   |              |                      |
| P19652                                                                     | 1             | 3.152            | R.SDVMYTDWK.K                     | 5            | A1AG2_HUMAN          |
| P19652                                                                     | 2             | 2.7151           | R.SDVMYTDWKK.D                    | 1            | A1AG2_HUMAN          |
| P19652                                                                     | 2             | 2.9054           | R.SDVM#YTDWKK.D                   | 2            | A1AG2_HUMAN          |
| P19652                                                                     | 2             | 2.9391           | R.SDVM#YTDWK.K                    | 1            | A1AG2_HUMAN          |
| P19652                                                                     | 2             | 3.4784           | R.EHVAHLLFLR.D                    | 4            | A1AG2_HUMAN          |

| <i>Accession No*</i>                                                      | <i>Charge</i> | <i>XC(Max)**</i> | <i>Peptide*</i>                   | <i>TC***</i> | <i>Reference No*</i> |
|---------------------------------------------------------------------------|---------------|------------------|-----------------------------------|--------------|----------------------|
| P19652                                                                    | 3             | 4.3797           | K.TLMFGSYLDDEKNWGLSFYADKPETTK.E   | 1            | A1AG2_HUMAN          |
| P19652                                                                    | 2             | 4.4105           | R.YEGGREHVAHLLFLR.D               | 6            | A1AG2_HUMAN          |
| <b><i>Alpha-1-antichymotrypsin precursor - Homo sapiens (Human)</i></b>   |               |                  |                                   |              |                      |
| P01011                                                                    | 2             | 4.7184           | K.ITLLSALVETR.T                   | 4            | AACT_HUMAN           |
| P01011                                                                    | 3             | 5.2817           | R.DYNLNDILLQLGIEEAFTSK.A          | 2            | AACT_HUMAN           |
| P01011                                                                    | 2             | 3.2272           | R.NLAVSQVVHK.A                    | 1            | AACT_HUMAN           |
| <b><i>Alpha-1-antitrypsin precursor - Homo sapiens (Human)</i></b>        |               |                  |                                   |              |                      |
| P01009                                                                    | 3             | 3.7301           | K.ELDRDVFALVNYIFFK.G              | 1            | A1AT_HUMAN           |
| P01009                                                                    | 2             | 4.468            | K.ITPNLAEFASFSLYR.Q               | 1            | A1AT_HUMAN           |
| P01009                                                                    | 2             | 3.5797           | K.KLSSWVLLMK.Y                    | 3            | A1AT_HUMAN           |
| <b><i>Alpha-1B-glycoprotein precursor - Homo sapiens (Human)</i></b>      |               |                  |                                   |              |                      |
| P04217                                                                    | 2             | 2.785            | R.LETPDFQLFK.N                    | 2            | A1BG_HUMAN           |
| <b><i>Alpha-2-antiplasmin precursor - Homo sapiens (Human)</i></b>        |               |                  |                                   |              |                      |
| P08697                                                                    | 2             | 3.8416           | K.LGNQEPGGQTALK.S                 | 3            | A2AP_HUMAN           |
| <b><i>Alpha-2-glycoprotein 1, zinc-binding - Homo sapiens (Human)</i></b> |               |                  |                                   |              |                      |
| Q5XKQ4                                                                    | 2             | 3.4938           | K.AYLEEECPATLR.K                  | 2            | Q5XKQ4_HUMA          |
| Q5XKQ4                                                                    | 2             | 3.635            | K.EIPAWVPFDPAAQITK.Q              | 1            | Q5XKQ4_HUMA          |
| Q5XKQ4                                                                    | 3             | 6.0105           | K.NILDRQDPPSVVVTSHQAPGEK.K        | 3            | Q5XKQ4_HUMA          |
| Q5XKQ4                                                                    | 2             | 2.8855           | K.QKWEAEPVYVQR.A                  | 1            | Q5XKQ4_HUMA          |
| Q5XKQ4                                                                    | 3             | 3.8545           | K.YYDYGKDYIEFNKEIPAWVPFDPAAQITK.Q | 1            | Q5XKQ4_HUMA          |
| Q5XKQ4                                                                    | 2             | 3.0553           | R.AGEVQPEL.R.G                    | 1            | Q5XKQ4_HUMA          |
| Q5XKQ4                                                                    | 3             | 4.0206           | R.AKAYLEEECPATLRK.Y               | 1            | Q5XKQ4_HUMA          |
| <b><i>Alpha-2-HS-glycoprotein precursor - Homo sapiens (Human)</i></b>    |               |                  |                                   |              |                      |
| P02765                                                                    | 2             | 3.8128           | K.HTLNQIDEVK.V                    | 4            | FETUA_HUMAN          |
| P02765                                                                    | 3             | 5.3042           | R.TVQPSVGAAGPVVPPCPGR.I           | 7            | FETUA_HUMAN          |
| P02765                                                                    | 2             | 3.9976           | R.QLKEHAVEGDCDFQLLK.L             | 5            | FETUA_HUMAN          |
| P02765                                                                    | 2             | 5.861            | R.HTFMGVVSLSGSPSGEVSHPR.K         | 9            | FETUA_HUMAN          |
| P02765                                                                    | 2             | 3.2806           | K.LDGKFSVVYAK.C                   | 3            | FETUA_HUMAN          |
| P02765                                                                    | 1             | 2.2868           | K.FSVYAK.C                        | 3            | FETUA_HUMAN          |
| P02765                                                                    | 2             | 3.6422           | K.EHAVEGDCDFQLLK.L                | 3            | FETUA_HUMAN          |
| P02765                                                                    | 3             | 6.5038           | R.HTFM#GVVSLGSPSGEVSHPR.K         | 7            | FETUA_HUMAN          |
| <b><i>Alpha-2-macroglobulin precursor - Homo sapiens (Human)</i></b>      |               |                  |                                   |              |                      |
| P01023                                                                    | 2             | 3.9748           | R.IAQWQSFQLEGGLK.Q                | 1            | A2MG_HUMAN           |
| P01023                                                                    | 2             | 3.4826           | K.AIGYLNTGYQR.Q                   | 2            | A2MG_HUMAN           |
| P01023                                                                    | 2             | 3.4432           | R.VGFYESDVMGR.G                   | 2            | A2MG_HUMAN           |

| <i>Accession No*</i> | <i>Charge</i> | <i>XC(Max)**</i> | <i>Peptide*</i>      | <i>TC***</i> | <i>Reference No*</i> |
|----------------------|---------------|------------------|----------------------|--------------|----------------------|
| P01023               | 2             | 3.5279           | R.VGFYESDVM#GR.G     | 2            | A2MG_HUMAN           |
| P01023               | 3             | 5.4968           | R.TEHPFTVEEFVLPK.F   | 3            | A2MG_HUMAN           |
| P01023               | 2             | 3.3019           | R.SASNMAIVDVK.M      | 2            | A2MG_HUMAN           |
| P01023               | 2             | 3.7238           | K.QSFPLSSEPFQGSYK.V  | 4            | A2MG_HUMAN           |
| P01023               | 2             | 3.5646           | K.NEDSLVVFQTDK.S     | 1            | A2MG_HUMAN           |
| P01023               | 2             | 3.3268           | K.LPPNVVEESAR.A      | 2            | A2MG_HUMAN           |
| P01023               | 2             | 3.5612           | K.HYDGSYSTFGER.Y     | 1            | A2MG_HUMAN           |
| P01023               | 2             | 3.9816           | K.ALLAYAFALAGNQDK.R  | 1            | A2MG_HUMAN           |
| P01023               | 3             | 4.5209           | K.DTVIKPLLVEPEGLEK.E | 5            | A2MG_HUMAN           |

***Alpha-2-macroglobulin receptor-associated protein precursor - Homo sapiens (Human)***

|        |   |        |                        |    |            |
|--------|---|--------|------------------------|----|------------|
| P30533 | 2 | 4.8357 | K.VHEYNVLLETLSR.T      | 7  | AMRP_HUMAN |
| P30533 | 2 | 3.9472 | R.TKELGYTVKK.H         | 2  | AMRP_HUMAN |
| P30533 | 3 | 3.7715 | R.TEEIHENVISPSDLSDIK.G | 1  | AMRP_HUMAN |
| P30533 | 3 | 5.684  | R.RVSHQGYSTAEFEFEEPR.V | 2  | AMRP_HUMAN |
| P30533 | 2 | 2.8355 | R.NLNVILAK.Y           | 3  | AMRP_HUMAN |
| P30533 | 2 | 4.3115 | R.VSHQGYSTAEFEFEEPR.V  | 2  | AMRP_HUMAN |
| P30533 | 2 | 3.5531 | R.HAESVGDGER.V         | 19 | AMRP_HUMAN |
| P30533 | 1 | 2.9278 | K.LNQLWEK.A            | 3  | AMRP_HUMAN |
| P30533 | 2 | 4.7025 | K.LKLDGLDEDGEKEAR.L    | 4  | AMRP_HUMAN |
| P30533 | 2 | 4.0836 | K.LDGLDEDGEKEAR.L      | 2  | AMRP_HUMAN |
| P30533 | 2 | 2.9767 | K.KHLQDLSGR.I          | 2  | AMRP_HUMAN |
| P30533 | 1 | 2.5932 | K.HLQDLSGR.I           | 1  | AMRP_HUMAN |
| P30533 | 2 | 4.0784 | K.FSGEELDKLWR.E        | 3  | AMRP_HUMAN |
| P30533 | 3 | 4.0719 | K.EKVHEYNVLLETLSR.T    | 2  | AMRP_HUMAN |
| P30533 | 2 | 3.4985 | R.LAELHADLK.I          | 2  | AMRP_HUMAN |
| P30533 | 2 | 3.6428 | K.LRHAESVGDGER.V       | 2  | AMRP_HUMAN |

***Alpha-crystallin B chain - Homo sapiens (Human)***

|        |   |        |                                 |   |             |
|--------|---|--------|---------------------------------|---|-------------|
| P02511 | 3 | 5.6838 | R.IPADVDPLTITSSLSGDVLTVNGPR.K   | 7 | CRYAB_HUMAN |
| P02511 | 2 | 3.2138 | R.TIPITREEKPAVTAAPK.K           | 2 | CRYAB_HUMAN |
| P02511 | 4 | 4.9023 | R.KYRIPADVPLTITSSLSGDVLTVNGPR.K | 1 | CRYAB_HUMAN |
| P02511 | 2 | 3.4263 | R.FSVNLDVK.H                    | 6 | CRYAB_HUMAN |
| P02511 | 1 | 2.2975 | R.EEKPAVTAAPK.K                 | 1 | CRYAB_HUMAN |
| P02511 | 2 | 4.3859 | R.APSWFDGLSEMR.L                | 4 | CRYAB_HUMAN |
| P02511 | 3 | 6.2511 | K.YRIPADVPLTITSSLSGDVLTVNGPR.K  | 2 | CRYAB_HUMAN |
| P02511 | 3 | 5.6321 | K.VLGDVIEVHGKHEERQDEHGFISR.E    | 2 | CRYAB_HUMAN |
| P02511 | 2 | 4.8821 | K.VLGDVIEVHGKHEER.Q             | 4 | CRYAB_HUMAN |

| <i>Accession No*</i>                                                                          | <i>Charge</i> | <i>XC(Max)**</i> | <i>Peptide*</i>                   | <i>TC***</i> | <i>Reference No*</i> |
|-----------------------------------------------------------------------------------------------|---------------|------------------|-----------------------------------|--------------|----------------------|
| P02511                                                                                        | 2             | 4.2703           | K.VLGDVIEVHGK.H                   | 5            | CRYAB_HUMAN          |
| P02511                                                                                        | 2             | 4.6097           | K.HFSPEELKVK.V                    | 4            | CRYAB_HUMAN          |
| P02511                                                                                        | 2             | 3.4141           | K.HEERQDEHGFISR.E                 | 2            | CRYAB_HUMAN          |
| P02511                                                                                        | 2             | 2.9098           | R.RPFFPFHSPSR.L                   | 1            | CRYAB_HUMAN          |
| P02511                                                                                        | 2             | 3.861            | R.APSWFDTGLSEM#R.L                | 5            | CRYAB_HUMAN          |
| <b><i>Alpha-enolase - Homo sapiens (Human)</i></b>                                            |               |                  |                                   |              |                      |
| P06733                                                                                        | 2             | 2.8779           | R.GNPTVEVDLFTSK.G                 | 1            | ENOA_HUMAN           |
| P06733                                                                                        | 1             | 2.7037           | R.IEEELGSK.A                      | 5            | ENOA_HUMAN           |
| P06733                                                                                        | 3             | 3.9343           | K.YGKDATNVGDEGGFAPNILENKEGLELLK.T | 1            | ENOA_HUMAN           |
| P06733                                                                                        | 2             | 2.7421           | K.LAMQEFM#ILPVGAANFR.E            | 1            | ENOA_HUMAN           |
| P06733                                                                                        | 2             | 3.8238           | K.LAM#QEFMILPVGAANFR.E            | 2            | ENOA_HUMAN           |
| P06733                                                                                        | 3             | 4.3108           | R.SGKYDLDFKSPDDPSR.Y              | 1            | ENOA_HUMAN           |
| <b><i>Alpha-hemoglobin-stabilizing protein - Homo sapiens (Human)</i></b>                     |               |                  |                                   |              |                      |
| Q9NZD4                                                                                        | 2             | 3.1162           | K.ALQELRQELNLANPFLAK.Y            | 1            | AHSP_HUMAN           |
| Q9NZD4                                                                                        | 2             | 2.7627           | K.SHELPSHPPSS.-                   | 2            | AHSP_HUMAN           |
| Q9NZD4                                                                                        | 2             | 2.7847           | R.QELNLANPFLAK.Y                  | 1            | AHSP_HUMAN           |
| <b><i>Alpha-ketoglutarate-dependent dioxygenase alkB homolog 3 - Homo sapiens (Human)</i></b> |               |                  |                                   |              |                      |
| Q96Q83                                                                                        | 2             | 2.9382           | K.SQAIAQPATTAK.S                  | 1            | ALKB3_HUMAN          |
| <b><i>Alpha-parvin - Homo sapiens (Human)</i></b>                                             |               |                  |                                   |              |                      |
| Q9NVD7                                                                                        | 2             | 2.9265           | K.DDSFLGK.L                       | 1            | PARVA_HUMAN          |
| <b><i>Alpha-protein kinase 2 - Homo sapiens (Human)</i></b>                                   |               |                  |                                   |              |                      |
| Q86TB3                                                                                        | 2             | 3.1916           | K.KAGPETPGEK.K                    | 1            | ALPK2_HUMAN          |
| Q86TB3                                                                                        | 2             | 3.047            | K.TLQTSTDSVSK.E                   | 1            | ALPK2_HUMAN          |
| Q86TB3                                                                                        | 3             | 4.531            | R.YKLPTAPEAAENDYPGIQGETR.D        | 1            | ALPK2_HUMAN          |
| <b><i>Alpha-synuclein - Homo sapiens (Human)</i></b>                                          |               |                  |                                   |              |                      |
| P37840                                                                                        | 2             | 6.205            | K.TVEGAGSIAAATGFVK.K              | 5            | SYUA_HUMAN           |
| P37840                                                                                        | 2             | 2.7514           | K.TKQGVAAEAGK.T                   | 1            | SYUA_HUMAN           |
| P37840                                                                                        | 2             | 4.6963           | K.TVEGAGSIAAATGFVKK.D             | 5            | SYUA_HUMAN           |
| P37840                                                                                        | 3             | 5.2921           | K.TKEGVVHGVATVAEK.T               | 3            | SYUA_HUMAN           |
| P37840                                                                                        | 2             | 3.6458           | K.AKEGVVAAAEEK.T                  | 2            | SYUA_HUMAN           |
| P37840                                                                                        | 2             | 3.8864           | K.EGVVHGVATVAEK.T                 | 3            | SYUA_HUMAN           |
| P37840                                                                                        | 3             | 4.38             | K.TKEQVTNVGAVVTGVTAVAQK.T         | 3            | SYUA_HUMAN           |
| <b><i>Alpha-taxilin - Homo sapiens (Human)</i></b>                                            |               |                  |                                   |              |                      |
| P40222                                                                                        | 2             | 2.896            | R.DVSEELSR.Q                      | 1            | TXLNA_HUMAN          |
| P40222                                                                                        | 2             | 3.2129           | R.VQDLSAGGQGS LTDSGPER.R          | 1            | TXLNA_HUMAN          |

| <i>Accession No*</i>                                                                                         | <i>Charge</i> | <i>XC(Max)**</i> | <i>Peptide*</i>                  | <i>TC***</i> | <i>Reference No*</i> |
|--------------------------------------------------------------------------------------------------------------|---------------|------------------|----------------------------------|--------------|----------------------|
| P40222                                                                                                       | 2             | 3.8272           | R.TAQSGALRDVSEELSR.Q             | 1            | TXLNA_HUMAN          |
| P40222                                                                                                       | 2             | 2.7417           | R.SLKEEGVQR.A                    | 1            | TXLNA_HUMAN          |
| P40222                                                                                                       | 2             | 2.9475           | R.DKELEGLQVK.I                   | 2            | TXLNA_HUMAN          |
| P40222                                                                                                       | 3             | 4.1227           | K.SSPGQPEAGPEGAQERPSQAAPAVEAEGPG | 2            | TXLNA_HUMAN          |
| P40222                                                                                                       | 2             | 3.7279           | K.LRQENMELAER.L                  | 1            | TXLNA_HUMAN          |
| P40222                                                                                                       | 2             | 2.713            | K.ALLEMAEEK.T                    | 1            | TXLNA_HUMAN          |
| P40222                                                                                                       | 2             | 2.9898           | R.SRWESSNK.A                     | 3            | TXLNA_HUMAN          |
| <b><i>AMBP protein precursor [Contains: Alpha-1-microglobulin - Homo sapiens (Human)]</i></b>                |               |                  |                                  |              |                      |
| P02760                                                                                                       | 2             | 3.3368           | R.ETLLQDFR.V                     | 2            | AMBP_HUMAN           |
| P02760                                                                                                       | 2             | 3.9766           | R.TVAACNLPIVR.G                  | 5            | AMBP_HUMAN           |
| <b><i>Aminopeptidase N - Homo sapiens (Human)</i></b>                                                        |               |                  |                                  |              |                      |
| P15144                                                                                                       | 2             | 3.1061           | R.QYMPWEAALSSLSYFK.L             | 1            | AMPN_HUMAN           |
| <b><i>Amyloid beta A4 precursor protein-binding family B member 1-interacting protein - Homo sapiens</i></b> |               |                  |                                  |              |                      |
| Q7Z5R6                                                                                                       | 2             | 3.9851           | R.SSDTSGSPATPLK.A                | 3            | AB1IP_HUMAN          |
| Q7Z5R6                                                                                                       | 3             | 5.7774           | K.RQENPGHPGGAGGGEQDFMSDLMK.A     | 2            | AB1IP_HUMAN          |
| <b><i>Amyloid beta A4 precursor protein-binding family B member 2 - Homo sapiens (Human)</i></b>             |               |                  |                                  |              |                      |
| Q92870                                                                                                       | 2             | 2.8026           | R.NSPATPPNTLNLR.S                | 1            | APBB2_HUMAN          |
| Q92870                                                                                                       | 2             | 2.7612           | R.GVLSLIDTLK.Q                   | 1            | APBB2_HUMAN          |
| Q92870                                                                                                       | 2             | 3.0276           | K.SFLNYYADLETSAR.E               | 1            | APBB2_HUMAN          |
| <b><i>Amyloid beta A4 protein precursor - Homo sapiens (Human)</i></b>                                       |               |                  |                                  |              |                      |
| P05067                                                                                                       | 3             | 5.2179           | K.AVIQHFQEKVESLEQEAAER.Q         | 2            | A4_HUMAN             |
| P05067                                                                                                       | 3             | 3.9552           | K.THPHFVIPYR.C                   | 1            | A4_HUMAN             |
| P05067                                                                                                       | 2             | 4.1136           | R.ISYGN DALM#PSLTETK.T           | 2            | A4_HUMAN             |
| P05067                                                                                                       | 2             | 5.2195           | R.ISYGN DALMPSLTETK.T            | 2            | A4_HUMAN             |
| <b><i>Amyotrophic lateral sclerosis 2 chromosomal region candidate gene 4 protein - Homo sapiens (Hu</i></b> |               |                  |                                  |              |                      |
| Q96Q45                                                                                                       | 2             | 3.5329           | R.RPSEGNEPSTK.E                  | 2            | AL2S4_HUMAN          |
| <b><i>AN1-type zinc finger protein 6 - Homo sapiens (Human)</i></b>                                          |               |                  |                                  |              |                      |
| Q6FIF0                                                                                                       | 3             | 6.3614           | K.AVPETEDVQASVSDTAQQPSEEQSK.S    | 2            | ZFAN6_HUMAN          |
| <b><i>Anamorsin - Homo sapiens (Human)</i></b>                                                               |               |                  |                                  |              |                      |
| Q6FI81                                                                                                       | 2             | 2.8803           | K.SREQMSSQPK.S                   | 1            | CPIN1_HUMAN          |
| <b><i>Anaphase-promoting complex subunit CDC26 - Homo sapiens (Human)</i></b>                                |               |                  |                                  |              |                      |
| Q8NHZ8                                                                                                       | 3             | 5.0574           | K.QKEDVEVVGSDGEGAGLSSDPK.S       | 2            | CDC26_HUMAN          |
| Q8NHZ8                                                                                                       | 2             | 3.4339           | K.SREQMINDR.I                    | 4            | CDC26_HUMAN          |
| <b><i>Androgen-induced proliferation inhibitor - Homo sapiens (Human)</i></b>                                |               |                  |                                  |              |                      |
| Q9NTI5                                                                                                       | 2             | 2.8528           | R.KKTPVTEQEEK.L                  | 1            | APRIN_HUMAN          |

| <i>Accession No*</i>                                                                       | <i>Charge</i> | <i>XC(Max)**</i> | <i>Peptide*</i>                  | <i>TC***</i> | <i>Reference No*</i> |
|--------------------------------------------------------------------------------------------|---------------|------------------|----------------------------------|--------------|----------------------|
| <b><i>Angiotensin-like protein 2 - Homo sapiens (Human)</i></b>                            |               |                  |                                  |              |                      |
| Q9Y2J4                                                                                     | 2             | 2.8668           | R.RAELLEQALGNAQGR.A              | 1            | AMOL2_HUMAN          |
| Q9Y2J4                                                                                     | 2             | 2.7205           | R.RQDEALR.E                      | 1            | AMOL2_HUMAN          |
| <b><i>Angiopoietin-2 precursor - Homo sapiens (Human)</i></b>                              |               |                  |                                  |              |                      |
| O15123                                                                                     | 2             | 3.6009           | R.DAPLEYDDSVQR.L                 | 3            | ANGP2_HUMAN          |
| <b><i>ANK repeat and LEM domain-containing protein KIAA0692 - Homo sapiens (Human)</i></b> |               |                  |                                  |              |                      |
| Q86XL3                                                                                     | 2             | 3.6494           | R.RTESEMSAR.I                    | 3            | K0692_HUMAN          |
| <b><i>Ankycorbin - Homo sapiens (Human)</i></b>                                            |               |                  |                                  |              |                      |
| Q9P0K7                                                                                     | 2             | 3.3075           | K.RLESSEAER.K                    | 2            | RAI14_HUMAN          |
| <b><i>Ankyrin repeat and SAM domain-containing protein 1A - Homo sapiens (Human)</i></b>   |               |                  |                                  |              |                      |
| Q92625                                                                                     | 3             | 3.7589           | K.ASMQLEETGVHAPGASQPSALDQSK.R    | 1            | ANKS1_HUMAN          |
| Q92625                                                                                     | 2             | 3.0853           | R.VGYLTGLPTTNSR.S                | 1            | ANKS1_HUMAN          |
| <b><i>Ankyrin repeat and SAM domain-containing protein 4B - Homo sapiens (Human)</i></b>   |               |                  |                                  |              |                      |
| Q8N8V4                                                                                     | 2             | 3.1229           | K.LPSELLQR.Q                     | 1            | ANS4B_HUMAN          |
| <b><i>Ankyrin repeat and SAM domain-containing protein 6 - Homo sapiens (Human)</i></b>    |               |                  |                                  |              |                      |
| Q68DC2                                                                                     | 3             | 4.1712           | K.GHTAESSVSSSSSHR.Q              | 1            | ANKS6_HUMAN          |
| <b><i>Ankyrin repeat domain-containing protein 47 - Homo sapiens (Human)</i></b>           |               |                  |                                  |              |                      |
| Q6NY19                                                                                     | 3             | 3.7168           | K.AAQTESPAEAPSLTQESSPGSMDGDRAVAP | 1            | ANR47_HUMAN          |
| Q6NY19                                                                                     | 2             | 4.7029           | K.FALNQNLPLDGGPR.L               | 2            | ANR47_HUMAN          |
| Q6NY19                                                                                     | 2             | 3.8078           | R.EAAEEAAAGAR.A                  | 2            | ANR47_HUMAN          |
| Q6NY19                                                                                     | 2             | 2.7639           | R.LRELEDQAR.T                    | 1            | ANR47_HUMAN          |
| Q6NY19                                                                                     | 2             | 3.0298           | R.RAPGPPTS.R                     | 2            | ANR47_HUMAN          |
| Q6NY19                                                                                     | 3             | 3.8922           | R.RLELAQTH.R                     | 4            | ANR47_HUMAN          |
| Q6NY19                                                                                     | 2             | 3.2123           | R.SSPAPNLAPASPGPAQLQLVR.E        | 1            | ANR47_HUMAN          |
| <b><i>Ankyrin repeat domain-containing protein 50 - Homo sapiens (Human)</i></b>           |               |                  |                                  |              |                      |
| Q9ULJ7                                                                                     | 2             | 2.7095           | K.IMIPSAQQEIGR.S                 | 1            | ANR50_HUMAN          |
| <b><i>Ankyrin repeat domain-containing protein 57 - Homo sapiens (Human)</i></b>           |               |                  |                                  |              |                      |
| Q53LP3                                                                                     | 2             | 5.092            | R.IQVTAEPEAPDGPAGPEAR.D          | 2            | ANR57_HUMAN          |
| <b><i>Ankyrin-1 - Homo sapiens (Human)</i></b>                                             |               |                  |                                  |              |                      |
| P16157                                                                                     | 2             | 3.2084           | R.QQGQEEQVQEA.N                  | 6            | ANK1_HUMAN           |
| P16157                                                                                     | 3             | 5.0855           | R.RQGQEEQVQEA.N                  | 4            | ANK1_HUMAN           |
| P16157                                                                                     | 3             | 4.0196           | R.QDDATGAGQDSENEVSLVSGHQR.G      | 1            | ANK1_HUMAN           |
| P16157                                                                                     | 2             | 3.2605           | R.DSGEGDTSR.L                    | 2            | ANK1_HUMAN           |
| P16157                                                                                     | 3             | 8.0517           | K.RQDDATGAGQDSENEVSLVSGHQR.G     | 2            | ANK1_HUMAN           |
| P16157                                                                                     | 2             | 3.272            | K.HSKDHTSTPNP.-                  | 1            | ANK1_HUMAN           |



| <i>Accession No*</i>                                                     | <i>Charge</i> | <i>XC(Max)**</i> | <i>Peptide*</i>            | <i>TC***</i> | <i>Reference No*</i> |
|--------------------------------------------------------------------------|---------------|------------------|----------------------------|--------------|----------------------|
| P16157                                                                   | 3             | 4.6544           | R.ITHSPTVSQVTER.S          | 4            | ANK1_HUMAN           |
| P16157                                                                   | 2             | 3.887            | R.TAAVLLQNDPNPDVLSK.T      | 1            | ANK1_HUMAN           |
| <b><i>Annexin A1 - Homo sapiens (Human)</i></b>                          |               |                  |                            |              |                      |
| P04083                                                                   | 2             | 5.3578           | K.GDRSEDFGVNEDLADSDAR.A    | 3            | ANXA1_HUMAN          |
| P04083                                                                   | 2             | 2.9981           | K.GTDVNVFNTILTTR.S         | 2            | ANXA1_HUMAN          |
| P04083                                                                   | 2             | 2.7629           | R.ALYEAGER.R               | 1            | ANXA1_HUMAN          |
| P04083                                                                   | 3             | 4.0465           | R.RKGTDVNVFNTILTTR.S       | 1            | ANXA1_HUMAN          |
| P04083                                                                   | 2             | 4.1172           | R.SEDFGVNEDLADSDAR.A       | 1            | ANXA1_HUMAN          |
| <b><i>Annexin A2 - Homo sapiens (Human)</i></b>                          |               |                  |                            |              |                      |
| P07355                                                                   | 3             | 4.8349           | K.TDLEKDIISDTSGDFRK.L      | 1            | ANXA2_HUMAN          |
| <b><i>Annexin A5 - Homo sapiens (Human)</i></b>                          |               |                  |                            |              |                      |
| P08758                                                                   | 2             | 3.4252           | R.GTVTDFPGFDER.A           | 3            | ANXA5_HUMAN          |
| P08758                                                                   | 3             | 4.4954           | K.WGTDEEKFITIFGTR.S        | 2            | ANXA5_HUMAN          |
| P08758                                                                   | 2             | 3.6604           | K.VLTEIIASR.T              | 4            | ANXA5_HUMAN          |
| P08758                                                                   | 2             | 3.5879           | K.NFATSLYSMIK.G            | 3            | ANXA5_HUMAN          |
| P08758                                                                   | 2             | 3.1335           | K.NFATSLYSM#IK.G           | 2            | ANXA5_HUMAN          |
| P08758                                                                   | 2             | 5.1708           | K.GLGTDEESILTLTTSR.S       | 3            | ANXA5_HUMAN          |
| P08758                                                                   | 2             | 2.7915           | K.HALKGAGTNEK.V            | 2            | ANXA5_HUMAN          |
| <b><i>Antigen KI-67 - Homo sapiens (Human)</i></b>                       |               |                  |                            |              |                      |
| P46013                                                                   | 2             | 2.7368           | K.ESADGLQGETQLLVSR.K       | 1            | KI67_HUMAN           |
| <b><i>AP-1 complex subunit mu-2 - Homo sapiens (Human)</i></b>           |               |                  |                            |              |                      |
| Q9Y6Q5                                                                   | 1             | 2.2171           | K.NKSVELEDVK.F             | 1            | AP1M2_HUMAN          |
| <b><i>API subunit gamma-binding protein 1 - Homo sapiens (Human)</i></b> |               |                  |                            |              |                      |
| Q9UMZ2                                                                   | 3             | 4.1696           | R.KLSPFVLSAGSGSPSATSILQK.K | 1            | SYNG_HUMAN           |
| Q9UMZ2                                                                   | 3             | 3.8773           | K.VTTFVSEDALPETTFPALASFK.D | 1            | SYNG_HUMAN           |
| Q9UMZ2                                                                   | 2             | 3.4389           | K.LSPFVLSAGSGSPSATSILQK.K  | 1            | SYNG_HUMAN           |
| Q9UMZ2                                                                   | 3             | 5.3689           | R.ELEQTAENKPLGESFAEFR.S    | 3            | SYNG_HUMAN           |
| Q9UMZ2                                                                   | 2             | 4.0369           | R.ETLGQIWALANR.T           | 3            | SYNG_HUMAN           |
| <b><i>AP2-associated protein kinase 1 - Homo sapiens (Human)</i></b>     |               |                  |                            |              |                      |
| Q2M2I8                                                                   | 2             | 3.9259           | K.AGQTQPNPILPIQPALTPR.K    | 3            | AAK1_HUMAN           |
| Q2M2I8                                                                   | 2             | 4.6192           | K.LTAEELLNKDFAK.L          | 2            | AAK1_HUMAN           |
| Q2M2I8                                                                   | 2             | 2.8103           | K.SATTTPSGSPR.T            | 1            | AAK1_HUMAN           |
| Q2M2I8                                                                   | 2             | 4.9574           | K.STQLLQAAAAEASLNK.S       | 2            | AAK1_HUMAN           |
| Q2M2I8                                                                   | 2             | 5.4892           | R.ILSDVTHSAVFGVPASK.S      | 3            | AAK1_HUMAN           |
| Q2M2I8                                                                   | 2             | 4.5825           | R.LTDPIPTTETSIAPR.Q        | 4            | AAK1_HUMAN           |

| <i>Accession No*</i>                                               | <i>Charge</i> | <i>XC(Max)**</i> | <i>Peptide*</i>                  | <i>TC***</i> | <i>Reference No*</i> |
|--------------------------------------------------------------------|---------------|------------------|----------------------------------|--------------|----------------------|
| <b><i>AP-3 complex subunit delta-1 - Homo sapiens (Human)</i></b>  |               |                  |                                  |              |                      |
| O14617                                                             | 3             | 4.4879           | K.HRPSEADEEELAR.R                | 1            | AP3D1_HUMAN          |
| O14617                                                             | 3             | 4.6702           | R.ALDIDLKPLADSEKLIQK.H           | 2            | AP3D1_HUMAN          |
| <b><i>AP-3 complex subunit sigma-1 - Homo sapiens (Human)</i></b>  |               |                  |                                  |              |                      |
| Q92572                                                             | 2             | 2.7682           | K.NMNLPEIPR.N                    | 1            | AP3S1_HUMAN          |
| <b><i>Apolipoprotein A-I precursor - Homo sapiens (Human)</i></b>  |               |                  |                                  |              |                      |
| P02647                                                             | 2             | 3.3242           | K.VEPLRAELQEGAR.Q                | 4            | APOA1_HUMAN          |
| P02647                                                             | 3             | 4.4584           | R.VKDLATVYVDVLKDSGR.D            | 2            | APOA1_HUMAN          |
| P02647                                                             | 2             | 4.7667           | R.VKDLATVYVDVLK.D                | 7            | APOA1_HUMAN          |
| P02647                                                             | 3             | 4.3498           | R.LAARLEALKENGGAR.L              | 3            | APOA1_HUMAN          |
| P02647                                                             | 2             | 4.1289           | R.DYVSQFEGSALGK.Q                | 4            | APOA1_HUMAN          |
| P02647                                                             | 3             | 4.193            | R.AHVDALRTHLAPYSDELRR.L          | 1            | APOA1_HUMAN          |
| P02647                                                             | 2             | 2.8725           | R.AELQEGAR.Q                     | 1            | APOA1_HUMAN          |
| P02647                                                             | 2             | 3.4639           | K.WQEEMELYR.Q                    | 2            | APOA1_HUMAN          |
| P02647                                                             | 2             | 3.3678           | K.WQEEM#ELYR.Q                   | 3            | APOA1_HUMAN          |
| P02647                                                             | 2             | 3.5603           | K.DLATVYVDVLK.D                  | 8            | APOA1_HUMAN          |
| P02647                                                             | 3             | 4.2074           | K.QLNLKLLDNWDSVTSTFSK.L          | 1            | APOA1_HUMAN          |
| P02647                                                             | 4             | 5.7437           | K.LREQLGPVTQEFWDNLEKETEGLR.Q     | 1            | APOA1_HUMAN          |
| P02647                                                             | 2             | 3.4792           | K.LLDNWDSVTSTFSK.L               | 2            | APOA1_HUMAN          |
| P02647                                                             | 3             | 5.3734           | K.DSGRDYVSQFEGSALGK.Q            | 11           | APOA1_HUMAN          |
| P02647                                                             | 3             | 4.7              | K.DLATVYVDVLKDSGRDYVSQFEGSALGK.Q | 4            | APOA1_HUMAN          |
| P02647                                                             | 2             | 2.7523           | K.VQPYLDDFQKK.W                  | 1            | APOA1_HUMAN          |
| P02647                                                             | 2             | 5.1729           | K.VSFLSALEEYTK.K                 | 8            | APOA1_HUMAN          |
| <b><i>Apolipoprotein A-II precursor - Homo sapiens (Human)</i></b> |               |                  |                                  |              |                      |
| P02652                                                             | 2             | 4.3009           | K.VKSPQLQAEAK.S                  | 4            | APOA2_HUMAN          |
| P02652                                                             | 2             | 3.6595           | K.SPELQAEAK.S                    | 5            | APOA2_HUMAN          |
| P02652                                                             | 2             | 3.4119           | K.SKEQLTPLIKK.A                  | 3            | APOA2_HUMAN          |
| P02652                                                             | 3             | 4.6826           | K.AGTELVNFLSYFVELGTQPATQ.-       | 12           | APOA2_HUMAN          |
| P02652                                                             | 2             | 3.5988           | K.SKEQLTPLIK.K                   | 4            | APOA2_HUMAN          |
| <b><i>Apolipoprotein A-IV precursor - Homo sapiens (Human)</i></b> |               |                  |                                  |              |                      |
| P06727                                                             | 3             | 3.9303           | K.KLVPFATELHER.L                 | 1            | APOA4_HUMAN          |
| P06727                                                             | 2             | 2.8492           | R.ISASAEELRQR.L                  | 1            | APOA4_HUMAN          |
| P06727                                                             | 2             | 2.7584           | R.ISASAEELR.Q                    | 1            | APOA4_HUMAN          |
| P06727                                                             | 2             | 3.7545           | R.RVEPYGENFNK.A                  | 2            | APOA4_HUMAN          |
| P06727                                                             | 2             | 3.9623           | K.ALVQQMEQLR.Q                   | 6            | APOA4_HUMAN          |

| <i>Accession No*</i>                                                                           | <i>Charge</i> | <i>XC(Max)**</i> | <i>Peptide*</i>               | <i>TC***</i> | <i>Reference No*</i> |
|------------------------------------------------------------------------------------------------|---------------|------------------|-------------------------------|--------------|----------------------|
| P06727                                                                                         | 3             | 3.9041           | K.AKIDQNVEELKGR.L             | 1            | APOA4_HUMAN          |
| P06727                                                                                         | 3             | 4.2681           | K.SLAELGGHLDQQVEEFRR.R        | 2            | APOA4_HUMAN          |
| P06727                                                                                         | 2             | 3.1313           | R.DKVNSSFSTFK.E               | 2            | APOA4_HUMAN          |
| <b><i>Apolipoprotein B-100 precursor - Homo sapiens (Human)</i></b>                            |               |                  |                               |              |                      |
| P04114                                                                                         | 3             | 5.7359           | R.VPSYTLILPSLELPVLHVPR.N      | 2            | APOB_HUMAN           |
| <b><i>Apolipoprotein B48 receptor - Homo sapiens (Human)</i></b>                               |               |                  |                               |              |                      |
| Q0VD83                                                                                         | 3             | 3.9124           | R.EADAGETEPEGAEGAGKGEEVVVEK.A | 1            | Q0VD83_HUMA          |
| Q0VD83                                                                                         | 2             | 3.1924           | R.ETEDEEAADR.T                | 3            | Q0VD83_HUMA          |
| Q0VD83                                                                                         | 3             | 4.1913           | R.HAGSVKPEASEAFPGAWENR.T      | 2            | Q0VD83_HUMA          |
| Q0VD83                                                                                         | 2             | 4.4229           | R.TEEAAESQTAGR.E              | 7            | Q0VD83_HUMA          |
| <b><i>Apolipoprotein C-II precursor - Homo sapiens (Human)</i></b>                             |               |                  |                               |              |                      |
| P02655                                                                                         | 2             | 2.9032           | K.TAAQNLYEK.T                 | 2            | APOC2_HUMAN          |
| <b><i>Apolipoprotein C-III precursor - Homo sapiens (Human)</i></b>                            |               |                  |                               |              |                      |
| P02656                                                                                         | 2             | 3.0207           | R.GWVTDFGSSLK.D               | 2            | APOC3_HUMAN          |
| P02656                                                                                         | 2             | 5.8927           | K.DALSSVQESQVAQQAR.G          | 16           | APOC3_HUMAN          |
| P02656                                                                                         | 2             | 5.5543           | K.TAKDALSSVQESQVAQQAR.G       | 3            | APOC3_HUMAN          |
| <b><i>Apolipoprotein E precursor - Homo sapiens (Human)</i></b>                                |               |                  |                               |              |                      |
| P02649                                                                                         | 2             | 3.7963           | R.AATVGLSLAGQPLQER.A          | 2            | APOE_HUMAN           |
| P02649                                                                                         | 1             | 2.1488           | R.DADDLQK.R                   | 1            | APOE_HUMAN           |
| P02649                                                                                         | 2             | 2.862            | R.LAVYQAGAR.E                 | 1            | APOE_HUMAN           |
| <b><i>Apolipoprotein O precursor - Homo sapiens (Human)</i></b>                                |               |                  |                               |              |                      |
| Q9BUR5                                                                                         | 2             | 2.7493           | R.SQLEESISQLR.H               | 1            | APOOL_HUMAN          |
| <b><i>Apolipoprotein O-like precursor - Homo sapiens (Human)</i></b>                           |               |                  |                               |              |                      |
| Q6UXV4                                                                                         | 2             | 2.8463           | K.HSVPLPTELSSEAK.T            | 1            | APOOL_HUMAN          |
| <b><i>Apoptosis inhibitor 5 - Homo sapiens (Human)</i></b>                                     |               |                  |                               |              |                      |
| Q9BZZ5                                                                                         | 2             | 3.2765           | R.ASEDTTSGSPPK.S              | 2            | API5_HUMAN           |
| Q9BZZ5                                                                                         | 2             | 4.1777           | R.ASEDTTSGSPPK.K              | 3            | API5_HUMAN           |
| Q9BZZ5                                                                                         | 2             | 3.313            | K.RASEDTTSGSPPK.K             | 2            | API5_HUMAN           |
| Q9BZZ5                                                                                         | 3             | 4.838            | K.RASEDTTSGSPPK.S             | 6            | API5_HUMAN           |
| <b><i>Apoptosis-associated speck-like protein containing a CARD - Homo sapiens (Human)</i></b> |               |                  |                               |              |                      |
| Q9ULZ3                                                                                         | 3             | 5.9553           | R.ARDAILDALLENLTAELKK.F       | 1            | ASC_HUMAN            |
| Q9ULZ3                                                                                         | 2             | 4.9201           | R.DAILDALLENLTAELKK.F         | 2            | ASC_HUMAN            |
| <b><i>Apoptosis-inducing factor 3 - Homo sapiens (Human)</i></b>                               |               |                  |                               |              |                      |
| Q96NN9                                                                                         | 2             | 2.7461           | K.DLENGQMREVELGWGK.V          | 1            | AIFM3_HUMAN          |
| <b><i>Apoptosis-related protein 3 precursor - Homo sapiens (Human)</i></b>                     |               |                  |                               |              |                      |

| <i>Accession No*</i>                                                                         | <i>Charge</i> | <i>XC(Max)**</i> | <i>Peptide*</i>                    | <i>TC***</i> | <i>Reference No*</i> |
|----------------------------------------------------------------------------------------------|---------------|------------------|------------------------------------|--------------|----------------------|
| Q6UW56                                                                                       | 2             | 2.7912           | K.VAFYC*KTTRELM#LHAR.C             | 1            | APR3_HUMAN           |
| <b><i>Apoptosis-stimulating of p53 protein 2 - Homo sapiens (Human)</i></b>                  |               |                  |                                    |              |                      |
| Q13625                                                                                       | 2             | 2.7851           | R.QQQQVAEQEK.L                     | 1            | ASPP2_HUMAN          |
| Q13625                                                                                       | 2             | 4.5275           | K.NFQQAVQSALTK.T                   | 3            | ASPP2_HUMAN          |
| <b><i>Apoptotic chromatin condensation inducer in the nucleus - Homo sapiens (Human)</i></b> |               |                  |                                    |              |                      |
| Q9UKV3                                                                                       | 3             | 5.7988           | R.NLKTEEEEEEEEEEEEEDEEEEEGDDEGQK.S | 1            | ACINU_HUMAN          |
| Q9UKV3                                                                                       | 3             | 7.6193           | R.NLKTEEEEEEEEEEEEEDEEEEEGDDEGQKS  | 2            | ACINU_HUMAN          |
| Q9UKV3                                                                                       | 2             | 3.2655           | R.RLSQPESA EK.H                    | 4            | ACINU_HUMAN          |
| Q9UKV3                                                                                       | 2             | 3.5964           | R.SAQPLPLKIEELALAK.G               | 1            | ACINU_HUMAN          |
| Q9UKV3                                                                                       | 2             | 3.7244           | R.SQEQEVLER.G                      | 3            | ACINU_HUMAN          |
| Q9UKV3                                                                                       | 2             | 3.4244           | R.TSTSSSSVQAR.R                    | 5            | ACINU_HUMAN          |
| Q9UKV3                                                                                       | 2             | 2.8915           | R.KISVVSATK.G                      | 1            | ACINU_HUMAN          |
| Q9UKV3                                                                                       | 2             | 3.0837           | K.TTSPLEEEEREIK.S                  | 2            | ACINU_HUMAN          |
| Q9UKV3                                                                                       | 1             | 3.5398           | R.WGASTATTQK.K                     | 4            | ACINU_HUMAN          |
| Q9UKV3                                                                                       | 3             | 6.6785           | K.HSTPHAAFQPN SQIGEEM#SQNSFIK.Q    | 1            | ACINU_HUMAN          |
| Q9UKV3                                                                                       | 3             | 5.6168           | K.STLADYSAQKDLEPESDR.S             | 6            | ACINU_HUMAN          |
| Q9UKV3                                                                                       | 2             | 3.5968           | K.GALMLENLQK.H                     | 5            | ACINU_HUMAN          |
| Q9UKV3                                                                                       | 4             | 5.6488           | K.HSTPHAAFQPN SQIGEEM SQNSFIK.Q    | 3            | ACINU_HUMAN          |
| Q9UKV3                                                                                       | 2             | 3.2493           | K.KPSISITTESLK.S                   | 2            | ACINU_HUMAN          |
| Q9UKV3                                                                                       | 2             | 2.961            | K.LLDDLFR.K                        | 2            | ACINU_HUMAN          |
| Q9UKV3                                                                                       | 2             | 4.2279           | K.LSEGSQPAEEEEEDQETPSR.N           | 8            | ACINU_HUMAN          |
| Q9UKV3                                                                                       | 2             | 4.3244           | R.LKGALMLENLQK.H                   | 3            | ACINU_HUMAN          |
| Q9UKV3                                                                                       | 3             | 3.9447           | K.SSSISEEKGDSDDEKPR.K              | 1            | ACINU_HUMAN          |
| Q9UKV3                                                                                       | 3             | 5.1636           | K.AESPAEKVPEESVLPLVQK.S            | 1            | ACINU_HUMAN          |
| Q9UKV3                                                                                       | 2             | 2.7092           | K.EFKEEGEEIPR.V                    | 1            | ACINU_HUMAN          |
| <b><i>Arachidonate 15-lipoxygenase type II - Homo sapiens (Human)</i></b>                    |               |                  |                                    |              |                      |
| O15296                                                                                       | 2             | 2.9726           | K.QLNYSLLCLPDIR.T                  | 1            | LX15B_HUMAN          |
| <b><i>Archaemetzincin-2 - Homo sapiens (Human)</i></b>                                       |               |                  |                                    |              |                      |
| Q86W34                                                                                       | 2             | 2.8337           | K.EWIIKCLAVLQK.-                   | 1            | AMZ2_HUMAN           |
| <b><i>ARF GTPase-activating protein GIT2 - Homo sapiens (Human)</i></b>                      |               |                  |                                    |              |                      |
| Q14161                                                                                       | 3             | 4.0797           | K.QATTNVYQVQTGSEYTDTSNHSSLK.R      | 1            | GIT2_HUMAN           |
| <b><i>Arfaptin-1 - Homo sapiens (Human)</i></b>                                              |               |                  |                                    |              |                      |
| P53367                                                                                       | 3             | 5.3015           | K.HSLPSGLGLSETQITSHGFDNTK.E        | 2            | ARFP1_HUMAN          |
| P53367                                                                                       | 2             | 4.4151           | K.SGPVILADEIKNPAMEK.L              | 1            | ARFP1_HUMAN          |
| P53367                                                                                       | 2             | 2.737            | R.LAQQGSDLIVPAGGQR.T               | 1            | ARFP1_HUMAN          |

| <i>Accession No*</i>                                                                                 | <i>Charge</i> | <i>XC(Max)**</i> | <i>Peptide*</i>                  | <i>TC***</i> | <i>Reference No*</i> |
|------------------------------------------------------------------------------------------------------|---------------|------------------|----------------------------------|--------------|----------------------|
| <b><i>Arginine/serine-rich coiled coil protein 1 - Homo sapiens (Human)</i></b>                      |               |                  |                                  |              |                      |
| Q96IZ7                                                                                               | 3             | 4.7659           | R.VKEIEAIESDSFVQQTFR.S           | 1            | RSRC1_HUMAN          |
| <b><i>ARHGAP5 protein - Homo sapiens (Human)</i></b>                                                 |               |                  |                                  |              |                      |
| Q05BE8                                                                                               | 3             | 5.3409           | R.VPLAHPEDMDPSDNYAEPIDTIFK.Q     | 2            | Q05BE8_HUMA          |
| Q05BE8                                                                                               | 2             | 3.374            | K.TIEAGIGKNPR.K                  | 2            | Q05BE8_HUMA          |
| <b><i>Armadillo repeat protein deleted in velo-cardio-facial syndrome - Homo sapiens (Human)</i></b> |               |                  |                                  |              |                      |
| O00192                                                                                               | 2             | 3.7283           | R.FQAEPYGLEDDTR.S                | 3            | ARVC_HUMAN           |
| O00192                                                                                               | 2             | 2.778            | R.SLAADDEGGPELEPDYGTATR.R        | 1            | ARVC_HUMAN           |
| <b><i>Armadillo repeat-containing X-linked protein 1 - Homo sapiens (Human)</i></b>                  |               |                  |                                  |              |                      |
| Q9P291                                                                                               | 2             | 3.7995           | K.AHSGSHSGGGLEAK.A               | 4            | ARMX1_HUMAN          |
| <b><i>Ashwin - Homo sapiens (Human)</i></b>                                                          |               |                  |                                  |              |                      |
| Q9BVC5                                                                                               | 4             | 4.7943           | R.KLSNSSSSVSPILSSNLPVNNKTEHNNNDK | 1            | ASHWN_HUMAN          |
| Q9BVC5                                                                                               | 3             | 4.0741           | R.KRPLIVFDGSSTSTSIK.V            | 1            | ASHWN_HUMAN          |
| Q9BVC5                                                                                               | 3             | 4.9271           | R.VNKDSLTDLYVQHAIPLPQR.D         | 2            | ASHWN_HUMAN          |
| <b><i>Asparaginase-like protein 1 - Homo sapiens (Human)</i></b>                                     |               |                  |                                  |              |                      |
| Q7L266                                                                                               | 2             | 5.0722           | K.GNVAYATSTGGIVNK.M              | 2            | Q7L266_HUMAN         |
| Q7L266                                                                                               | 2             | 3.6327           | R.AATVGYGILR.E                   | 7            | Q7L266_HUMAN         |
| <b><i>Aspartate aminotransferase, cytoplasmic - Homo sapiens (Human)</i></b>                         |               |                  |                                  |              |                      |
| P17174                                                                                               | 2             | 3.3812           | K.NLDYVATSIHEAVTK.I              | 1            | AATC_HUMAN           |
| <b><i>Aspartate aminotransferase, mitochondrial precursor - Homo sapiens (Human)</i></b>             |               |                  |                                  |              |                      |
| P00505                                                                                               | 2             | 3.082            | R.KAEAQIAAK.N                    | 2            | AATM_HUMAN           |
| <b><i>AT hook DNA-binding motif-containing protein 1 - Homo sapiens (Human)</i></b>                  |               |                  |                                  |              |                      |
| Q5TGY3                                                                                               | 2             | 3.7895           | K.VGTGLLADFLGR.T                 | 1            | Q5TGY3_HUMA          |
| Q5TGY3                                                                                               | 3             | 4.6063           | R.LSRPPAPPPGDLQYSFFSSPSLANSIR.S  | 1            | Q5TGY3_HUMA          |
| <b><i>Ataxin-2 - Homo sapiens (Human)</i></b>                                                        |               |                  |                                  |              |                      |
| Q99700                                                                                               | 3             | 6.2635           | R.KPGGSGLLASPAAPSPSSSSVSSSSATAPS | 1            | ATX2_HUMAN           |
| <b><i>Ataxin-2-like protein - Homo sapiens (Human)</i></b>                                           |               |                  |                                  |              |                      |
| Q8WWM7                                                                                               | 2             | 2.8819           | K.ISLAPTDVK.E                    | 1            | ATX2L_HUMAN          |
| Q8WWM7                                                                                               | 2             | 4.1046           | R.GPHHLDNSSPGPGSEAR.G            | 1            | ATX2L_HUMAN          |
| Q8WWM7                                                                                               | 3             | 4.4377           | K.GEDKDEGPVAEQVKK.S              | 1            | ATX2L_HUMAN          |
| Q8WWM7                                                                                               | 2             | 2.9629           | K.FNEENYGVK.T                    | 2            | ATX2L_HUMAN          |
| Q8WWM7                                                                                               | 2             | 3.7036           | K.EVDGLLTSEPMGSPVSSK.T           | 2            | ATX2L_HUMAN          |
| Q8WWM7                                                                                               | 2             | 3.7182           | K.EKEVDGLLTSEPMGSPVSSK.T         | 2            | ATX2L_HUMAN          |
| Q8WWM7                                                                                               | 2             | 3.6949           | K.EFNPTKPLLSVVK.S                | 3            | ATX2L_HUMAN          |
| Q8WWM7                                                                                               | 2             | 2.704            | K.STSTPTSPGPR.T                  | 1            | ATX2L_HUMAN          |

| <i>Accession No*</i>                                                                         | <i>Charge</i> | <i>XC(Max)**</i> | <i>Peptide*</i>              | <i>TC***</i> | <i>Reference No*</i> |
|----------------------------------------------------------------------------------------------|---------------|------------------|------------------------------|--------------|----------------------|
| <b><i>Atherin - Homo sapiens (Human)</i></b>                                                 |               |                  |                              |              |                      |
| Q6SPF0                                                                                       | 2             | 2.9726           | R.RAPPPAVALR.E               | 2            | SAMD1_HUMAN          |
| <b><i>AT-hook-containing transcription factor 1 - Homo sapiens (Human)</i></b>               |               |                  |                              |              |                      |
| Q8WYP5                                                                                       | 2             | 3.5772           | R.NLSFNELYPSGTLK.L           | 1            | AHTF1_HUMAN          |
| Q8WYP5                                                                                       | 2             | 3.44             | K.SAQQEASADVATPK.M           | 2            | AHTF1_HUMAN          |
| Q8WYP5                                                                                       | 3             | 3.8556           | K.SKVPVLDEGLTSVETYTPAIR.A    | 1            | AHTF1_HUMAN          |
| Q8WYP5                                                                                       | 2             | 3.2323           | R.GLSQNQQIPQNSVTPR.R         | 1            | AHTF1_HUMAN          |
| Q8WYP5                                                                                       | 2             | 3.4186           | R.KINPSEDVGSK.A              | 2            | AHTF1_HUMAN          |
| <b><i>ATP synthase D chain, mitochondrial - Homo sapiens (Human)</i></b>                     |               |                  |                              |              |                      |
| O75947                                                                                       | 2             | 3.7704           | R.IVEYEKEMEK.M               | 4            | ATP5H_HUMAN          |
| O75947                                                                                       | 2             | 3.4584           | R.IVEYEKEM#EK.M              | 2            | ATP5H_HUMAN          |
| O75947                                                                                       | 2             | 4.1991           | K.YPYWPHQPIENL.-             | 5            | ATP5H_HUMAN          |
| O75947                                                                                       | 2             | 2.9157           | K.KYPYWPHQPIENL.-            | 1            | ATP5H_HUMAN          |
| O75947                                                                                       | 3             | 4.7991           | K.VPVPEDKYTAQVDAEEKEDVK.S    | 1            | ATP5H_HUMAN          |
| <b><i>ATP synthase delta chain, mitochondrial precursor - Homo sapiens (Human)</i></b>       |               |                  |                              |              |                      |
| P30049                                                                                       | 2             | 5.1591           | K.AQAELVGTADEATR.A           | 5            | ATPD_HUMAN           |
| P30049                                                                                       | 3             | 3.9954           | K.AQAELVGTADEATRAEIQR.I      | 4            | ATPD_HUMAN           |
| <b><i>ATP synthase e chain, mitochondrial - Homo sapiens (Human)</i></b>                     |               |                  |                              |              |                      |
| P56385                                                                                       | 2             | 2.7827           | R.YNYLKPR.A                  | 1            | ATP5I_HUMAN          |
| P56385                                                                                       | 1             | 2.1219           | R.ELAEDDSILK.-               | 1            | ATP5I_HUMAN          |
| <b><i>ATP synthase subunit alpha, mitochondrial precursor - Homo sapiens (Human)</i></b>     |               |                  |                              |              |                      |
| P25705                                                                                       | 2             | 4.4608           | R.VVDALGNAIDGKGPIGSK.T       | 2            | ATPA_HUMAN           |
| P25705                                                                                       | 2             | 2.8568           | R.NVQAEEMVEFSSGLK.G          | 1            | ATPA_HUMAN           |
| P25705                                                                                       | 2             | 3.8391           | K.TGTAEM#SSILEER.I           | 3            | ATPA_HUMAN           |
| P25705                                                                                       | 2             | 5.2474           | R.ILGADTSVDLEETGR.V          | 2            | ATPA_HUMAN           |
| <b><i>ATP synthase subunit beta, mitochondrial precursor - Homo sapiens (Human)</i></b>      |               |                  |                              |              |                      |
| P06576                                                                                       | 2             | 2.8935           | K.ADKLAEHSS.-                | 1            | ATPB_HUMAN           |
| P06576                                                                                       | 3             | 4.2714           | K.VLDSGAPIKIPVGPETLGR.I      | 2            | ATPB_HUMAN           |
| <b><i>ATP synthase-coupling factor 6, mitochondrial precursor - Homo sapiens (Human)</i></b> |               |                  |                              |              |                      |
| P18859                                                                                       | 3             | 3.9544           | K.LKQMFNGNADM#NTFPTFK.F      | 1            | ATP5J_HUMAN          |
| P18859                                                                                       | 2             | 5.8939           | R.QTSGGPVDASSEYQQELER.E      | 3            | ATP5J_HUMAN          |
| P18859                                                                                       | 3             | 5.3403           | K.RQTSGGPVDASSEYQQELERELFK.L | 1            | ATP5J_HUMAN          |
| P18859                                                                                       | 3             | 4.5872           | K.RQTSGGPVDASSEYQQELER.E     | 2            | ATP5J_HUMAN          |
| P18859                                                                                       | 2             | 3.6703           | K.QMFGNADMNTFPTFK.F          | 11           | ATP5J_HUMAN          |
| P18859                                                                                       | 2             | 3.3408           | K.QM#FGNADMNTFPTFK.F         | 2            | ATP5J_HUMAN          |

| <i>Accession No*</i>                                                                  | <i>Charge</i> | <i>XC(Max)**</i> | <i>Peptide*</i>                  | <i>TC***</i> | <i>Reference No*</i> |
|---------------------------------------------------------------------------------------|---------------|------------------|----------------------------------|--------------|----------------------|
| P18859                                                                                | 3             | 4.0925           | K.LKQMFGNADMNTFPTFK.F            | 3            | ATP5J_HUMAN          |
| P18859                                                                                | 3             | 4.253            | K.LKQM#FGNADMNTFPTFK.F           | 1            | ATP5J_HUMAN          |
| P18859                                                                                | 3             | 5.1983           | K.LKQM#FGNADM#NTFPTFK.F          | 1            | ATP5J_HUMAN          |
| P18859                                                                                | 1             | 2.3024           | K.LFVDKIR.E                      | 2            | ATP5J_HUMAN          |
| P18859                                                                                | 2             | 4.6106           | K.FEDPKFEVIEKPQA.-               | 7            | ATP5J_HUMAN          |
| P18859                                                                                | 2             | 2.8034           | K.QM#FGNADM#NTFPTFK.F            | 1            | ATP5J_HUMAN          |
| <b><i>ATP-binding cassette sub-family F member 3 - Homo sapiens (Human)</i></b>       |               |                  |                                  |              |                      |
| Q9NUQ8                                                                                | 2             | 2.7127           | R.EYEAQQQYR.Q                    | 1            | ABCF3_HUMAN          |
| Q9NUQ8                                                                                | 3             | 6.1564           | R.LAEPQSQGNSQVLLDAPIQLSK.I       | 5            | ABCF3_HUMAN          |
| <b><i>ATP-binding cassette, sub-family F - Homo sapiens (Human)</i></b>               |               |                  |                                  |              |                      |
| Q5STZ8                                                                                | 3             | 5.3512           | K.VLKEKEQQQQQQQQQQK.K            | 2            | Q5STZ8_HUMA          |
| <b><i>ATP-dependent DNA helicase 2 subunit 1 - Homo sapiens (Human)</i></b>           |               |                  |                                  |              |                      |
| P12956                                                                                | 3             | 5.2478           | K.SGLKKQELLEALTK.H               | 2            | KU70_HUMAN           |
| P12956                                                                                | 3             | 4.1842           | K.KQELLEALTK.H                   | 5            | KU70_HUMAN           |
| <b><i>ATP-dependent DNA helicase Q1 - Homo sapiens (Human)</i></b>                    |               |                  |                                  |              |                      |
| P46063                                                                                | 2             | 4.1069           | K.AANMLQQSGSK.N                  | 1            | RECQ1_HUMAN          |
| P46063                                                                                | 2             | 4.1175           | K.KAANMLQQSGSK.N                 | 2            | RECQ1_HUMAN          |
| <b><i>ATP-dependent RNA helicase A - Homo sapiens (Human)</i></b>                     |               |                  |                                  |              |                      |
| Q08211                                                                                | 2             | 3.2038           | K.AENNSEVGASGYGVPPTWDR.G         | 2            | DHX9_HUMAN           |
| <b><i>ATP-dependent RNA helicase DDX19B - Homo sapiens (Human)</i></b>                |               |                  |                                  |              |                      |
| Q9UMR2                                                                                | 3             | 4.5623           | K.TNANAECTDEEEKEDR.A             | 4            | DD19B_HUMAN          |
| <b><i>ATP-dependent RNA helicase DDX42 - Homo sapiens (Human)</i></b>                 |               |                  |                                  |              |                      |
| Q86XP3                                                                                | 3             | 5.6802           | K.GIPFGNTGNISGAPVTYPSAGAQQVNTAS  | 1            | DDX42_HUMAN          |
| Q86XP3                                                                                | 3             | 4.3563           | K.LPQQSHSAFGATSSSSGFGK.S         | 3            | DDX42_HUMAN          |
| Q86XP3                                                                                | 2             | 2.9243           | K.SHFVAASLSNQK.A                 | 1            | DDX42_HUMAN          |
| Q86XP3                                                                                | 2             | 4.4563           | K.TDKTADGFAVPEPPK.R              | 4            | DDX42_HUMAN          |
| Q86XP3                                                                                | 3             | 3.7509           | K.TDKTADGFAVPEPPK.R.K            | 1            | DDX42_HUMAN          |
| <b><i>AT-rich interactive domain-containing protein 1A - Homo sapiens (Human)</i></b> |               |                  |                                  |              |                      |
| O14497                                                                                | 2             | 3.5179           | K.AAAGQESEGPVAVGPPQLGK.E         | 1            | ARI1A_HUMAN          |
| O14497                                                                                | 3             | 5.8999           | R.GGTPGSGAAAAAGSKPPSSASASSSSSS   | 1            | ARI1A_HUMAN          |
| <b><i>AT-rich interactive domain-containing protein 1B - Homo sapiens (Human)</i></b> |               |                  |                                  |              |                      |
| Q8NFD5                                                                                | 2             | 4.3983           | K.DMGAQYAAASPAWAAAQQR.S          | 2            | ARI1B_HUMAN          |
| Q8NFD5                                                                                | 3             | 4.0786           | K.DSAAGGQADPPGPPLLSKPGDEDDAPPK.M | 3            | ARI1B_HUMAN          |
| Q8NFD5                                                                                | 2             | 3.5245           | K.DM#GAQYAAASPAWAAAQQR.S         | 2            | ARI1B_HUMAN          |
| <b><i>Attractin precursor - Homo sapiens (Human)</i></b>                              |               |                  |                                  |              |                      |

| <i>Accession No*</i>                                                                       | <i>Charge</i> | <i>XC(Max)**</i> | <i>Peptide*</i>                    | <i>TC***</i> | <i>Reference No*</i> |
|--------------------------------------------------------------------------------------------|---------------|------------------|------------------------------------|--------------|----------------------|
| O75882                                                                                     | 2             | 4.1074           | R.LTGSSGFVTDGPGNYK.Y               | 2            | ATRN_HUMAN           |
| <b><i>ATXN3 protein - Homo sapiens (Human)</i></b>                                         |               |                  |                                    |              |                      |
| Q4VBR4                                                                                     | 3             | 4.7839           | R.VLEANDGSGMLDEDEEDLQR.A           | 1            | Q4VBR4_HUMA          |
| <b><i>Autogenous vein graft remodeling associated protein 2 - Homo sapiens (Human)</i></b> |               |                  |                                    |              |                      |
| Q2HYQ4                                                                                     | 2             | 2.7244           | K.KQSQHTSTVNVLQK.F                 | 1            | Q2HYQ4_HUMA          |
| <b><i>Autophagy-related protein 3 - Homo sapiens (Human)</i></b>                           |               |                  |                                    |              |                      |
| Q9NT62                                                                                     | 2             | 4.3229           | K.ALEVAEYLTPVLK.E                  | 4            | ATG3_HUMAN           |
| <b><i>Axin-1 - Homo sapiens (Human)</i></b>                                                |               |                  |                                    |              |                      |
| O15169                                                                                     | 2             | 3.1086           | K.SASTEVPGASEDAEKNQK.I             | 1            | AXN1_HUMAN           |
| <b><i>BAG family molecular chaperone regulator 3 - Homo sapiens (Human)</i></b>            |               |                  |                                    |              |                      |
| O95817                                                                                     | 2             | 2.956            | R.SSLGSHQLPR.G                     | 4            | BAG3_HUMAN           |
| O95817                                                                                     | 2             | 2.854            | K.YLMIEEYLTK.E                     | 2            | BAG3_HUMAN           |
| O95817                                                                                     | 2             | 3.7073           | R.VHTVVDPRQQPMTHR.E                | 3            | BAG3_HUMAN           |
| O95817                                                                                     | 2             | 3.7282           | R.SQSPAASDCSSSSSSASLPSSGR.S        | 1            | BAG3_HUMAN           |
| O95817                                                                                     | 3             | 3.7267           | R.PAAQPSFHQAQK.T                   | 1            | BAG3_HUMAN           |
| O95817                                                                                     | 2             | 4.8734           | R.KVQTILEKLEQK.A                   | 5            | BAG3_HUMAN           |
| O95817                                                                                     | 2             | 2.8926           | R.KVQTILEK.L                       | 1            | BAG3_HUMAN           |
| O95817                                                                                     | 3             | 7.1929           | R.GMPETTQPDKQCGQVAAAAAQQPPASHGPE   | 2            | BAG3_HUMAN           |
| O95817                                                                                     | 2             | 3.8979           | R.FRTEAAAAAPQR.S                   | 5            | BAG3_HUMAN           |
| O95817                                                                                     | 3             | 3.7805           | K.EVDSKPVSQKPPPPSEK.V              | 1            | BAG3_HUMAN           |
| O95817                                                                                     | 2             | 4.1626           | K.VQTILEKLEQK.A                    | 4            | BAG3_HUMAN           |
| O95817                                                                                     | 2             | 4.1898           | K.ELLALDSVDPEGR.A                  | 6            | BAG3_HUMAN           |
| O95817                                                                                     | 3             | 4.3179           | K.KNAGNAEDPHTTETQQPEATAAATSNPSSMT  | 1            | BAG3_HUMAN           |
| O95817                                                                                     | 3             | 5.1              | K.NAGNAEDPHTTETQQPEATAAATSNPSSM#TD | 1            | BAG3_HUMAN           |
| O95817                                                                                     | 1             | 2.4387           | K.VEAILEK.V                        | 2            | BAG3_HUMAN           |
| O95817                                                                                     | 3             | 4.6328           | K.VEAILEKVQGLEQAVDNFEGK.K          | 1            | BAG3_HUMAN           |
| O95817                                                                                     | 3             | 6.4087           | K.VEAILEKVQGLEQAVDNFEGKK.T         | 4            | BAG3_HUMAN           |
| O95817                                                                                     | 2             | 5.0659           | K.VQGLEQAVDNFEGKK.T                | 7            | BAG3_HUMAN           |
| O95817                                                                                     | 3             | 4.8637           | R.VPSEGPKETPSSANGPSR.E             | 3            | BAG3_HUMAN           |
| <b><i>BAG family molecular chaperone regulator 4 - Homo sapiens (Human)</i></b>            |               |                  |                                    |              |                      |
| O95429                                                                                     | 2             | 4.5469           | K.DSSYPYSQSDQSMNR.H                | 3            | BAG4_HUMAN           |
| O95429                                                                                     | 2             | 2.918            | R.SSGNSPTVSR.W                     | 1            | BAG4_HUMAN           |
| <b><i>Band 4.1-like protein 1 - Homo sapiens (Human)</i></b>                               |               |                  |                                    |              |                      |
| Q9H4G0                                                                                     | 2             | 3.8655           | K.HQASINELKR.T                     | 5            | E41L1_HUMAN          |
| Q9H4G0                                                                                     | 2             | 3.5302           | R.KKIEPEAVLQTR.V                   | 3            | E41L1_HUMAN          |



| <i>Accession No*</i>                                                                                        | <i>Charge</i> | <i>XC(Max)**</i> | <i>Peptide*</i>                     | <i>TC***</i> | <i>Reference No*</i> |
|-------------------------------------------------------------------------------------------------------------|---------------|------------------|-------------------------------------|--------------|----------------------|
| Q9H4G0                                                                                                      | 2             | 4.2703           | R.VSAMDNTQQVDGSASVGR.E              | 5            | E41L1_HUMAN          |
| Q9H4G0                                                                                                      | 2             | 4.3161           | R.VSAM#DNTQQVDGSASVGR.E             | 3            | E41L1_HUMAN          |
| Q9H4G0                                                                                                      | 3             | 7.0706           | R.SLSPIIGKDVLTSTYGATAETLSTSTTHVTK.T | 1            | E41L1_HUMAN          |
| Q9H4G0                                                                                                      | 2             | 4.2896           | K.KIEPEAVLQTR.V                     | 5            | E41L1_HUMAN          |
| Q9H4G0                                                                                                      | 2             | 2.8268           | K.GAPSQDDESGGIEDSPDR.G              | 1            | E41L1_HUMAN          |
| Q9H4G0                                                                                                      | 2             | 4.7041           | K.GAAAM#IPGPQTVATEIR.S              | 4            | E41L1_HUMAN          |
| Q9H4G0                                                                                                      | 2             | 3.9838           | R.DLNGKAPSQDDESGGIEDSPDR.G          | 1            | E41L1_HUMAN          |
| <b><i>Band 4.1-like protein 3 - Homo sapiens (Human)</i></b>                                                |               |                  |                                     |              |                      |
| Q9Y2J2                                                                                                      | 2             | 3.4001           | K.VVQETVLVEER.R                     | 1            | E41L3_HUMAN          |
| Q9Y2J2                                                                                                      | 2             | 4.5506           | K.EGSALTEGAKEEGGEEVAK.A             | 4            | E41L3_HUMAN          |
| Q9Y2J2                                                                                                      | 2             | 4.8002           | R.TFLETSTDTAVTNEWKR.L               | 2            | E41L3_HUMAN          |
| Q9Y2J2                                                                                                      | 3             | 7.2128           | R.RVVHASGDASYSAGDSGDAAAQPAFTGIK.G   | 3            | E41L3_HUMAN          |
| Q9Y2J2                                                                                                      | 3             | 5.4494           | R.VVHASGDASYSAGDSGDAAAQPAFTGIK.G    | 3            | E41L3_HUMAN          |
| Q9Y2J2                                                                                                      | 2             | 4.7349           | R.KGEEVTPISAIRHEGK.S                | 1            | E41L3_HUMAN          |
| Q9Y2J2                                                                                                      | 2             | 3.6864           | R.KGEEVTPISAIR.H                    | 2            | E41L3_HUMAN          |
| Q9Y2J2                                                                                                      | 3             | 3.72             | R.IVITGDADIDHDQALAQAIKEAK.E         | 1            | E41L3_HUMAN          |
| Q9Y2J2                                                                                                      | 2             | 3.5439           | K.VVVKETEITPEDGED.-                 | 1            | E41L3_HUMAN          |
| Q9Y2J2                                                                                                      | 2             | 4.0843           | K.TESSGIETEPTVHHLPLSTEK.V           | 1            | E41L3_HUMAN          |
| Q9Y2J2                                                                                                      | 2             | 3.1333           | K.LMDGSEIFSLLESAR.K                 | 1            | E41L3_HUMAN          |
| Q9Y2J2                                                                                                      | 2             | 3.9476           | K.HQTNISELKR.T                      | 3            | E41L3_HUMAN          |
| Q9Y2J2                                                                                                      | 2             | 6.0492           | K.GKEGSALTEGAKEEGGEEVAK.A           | 5            | E41L3_HUMAN          |
| Q9Y2J2                                                                                                      | 2             | 4.0768           | K.GISQTNLITVTPEK.K                  | 1            | E41L3_HUMAN          |
| Q9Y2J2                                                                                                      | 2             | 3.9421           | K.AVLEQEETAASR.E                    | 2            | E41L3_HUMAN          |
| Q9Y2J2                                                                                                      | 3             | 4.7943           | K.TITYESSQVDPGTDLEPGVLSAQTITSETTS   | 1            | E41L3_HUMAN          |
| Q9Y2J2                                                                                                      | 2             | 4.695            | K.GISQTNLITVTPEKK.A                 | 2            | E41L3_HUMAN          |
| <b><i>Barrier-to-autointegration factor - Homo sapiens (Human)</i></b>                                      |               |                  |                                     |              |                      |
| O75531                                                                                                      | 2             | 3.8438           | K.AYVVLGQFLVLK.K                    | 2            | BAF_HUMAN            |
| O75531                                                                                                      | 3             | 5.6158           | R.DFVAEPMGEKPVGSLAGIGEVLGK.K        | 1            | BAF_HUMAN            |
| O75531                                                                                                      | 3             | 4.4938           | R.DFVAEPM#GEKPVGSLAGIGEVLGK.K       | 1            | BAF_HUMAN            |
| O75531                                                                                                      | 3             | 6.6133           | K.HRDFVAEPMGEKPVGSLAGIGEVLGK.K      | 3            | BAF_HUMAN            |
| <b><i>Basement membrane-specific heparan sulfate proteoglycan core protein precursor - Homo sapiens</i></b> |               |                  |                                     |              |                      |
| P98160                                                                                                      | 1             | 2.7801           | R.VTVTSEGGR.G                       | 2            | PGBM_HUMAN           |
| P98160                                                                                                      | 3             | 5.0079           | R.SPVISIDPPSSTVQQGDASF.K            | 1            | PGBM_HUMAN           |
| P98160                                                                                                      | 3             | 5.0038           | R.LRSPVISIDPPSSTVQQGDASF.K          | 2            | PGBM_HUMAN           |
| P98160                                                                                                      | 2             | 4.3795           | R.LPAVEPTDQAQYL.CR.A                | 2            | PGBM_HUMAN           |

| <i>Accession No*</i>                                                                          | <i>Charge</i> | <i>XC(Max)**</i> | <i>Peptide*</i>                   | <i>TC***</i> | <i>Reference No*</i> |
|-----------------------------------------------------------------------------------------------|---------------|------------------|-----------------------------------|--------------|----------------------|
| P98160                                                                                        | 2             | 3.0021           | R.LGTVPQFPR.A                     | 1            | PGBM_HUMAN           |
| P98160                                                                                        | 3             | 4.2778           | R.GM#LEPVQRPDVVLVAGYR.L           | 1            | PGBM_HUMAN           |
| P98160                                                                                        | 2             | 2.8751           | R.GHTPTQPGALNQR.Q                 | 1            | PGBM_HUMAN           |
| P98160                                                                                        | 2             | 2.876            | R.AQAGANTRPCPS.-                  | 2            | PGBM_HUMAN           |
| P98160                                                                                        | 2             | 3.2148           | R.AM#DFNGILTIR.N                  | 2            | PGBM_HUMAN           |
| P98160                                                                                        | 2             | 3.3497           | K.SPAYTLVWTR.L                    | 1            | PGBM_HUMAN           |
| P98160                                                                                        | 2             | 3.1641           | R.YELGSGLAVLR.S                   | 1            | PGBM_HUMAN           |
| P98160                                                                                        | 2             | 2.9884           | R.LEGDTLIIPR.V                    | 1            | PGBM_HUMAN           |
| <b><i>Basigin precursor - Homo sapiens (Human)</i></b>                                        |               |                  |                                   |              |                      |
| P35613                                                                                        | 2             | 4.7616           | K.GGVVLKEDALPGQK.T                | 4            | BASI_HUMAN           |
| P35613                                                                                        | 2             | 3.1863           | K.SESVPPVTDWAWYK.I                | 1            | BASI_HUMAN           |
| P35613                                                                                        | 2             | 3.4861           | R.FFVSSSQGR.S                     | 5            | BASI_HUMAN           |
| P35613                                                                                        | 3             | 5.0806           | R.RKPEDVLDDDDAGSAPLK.S            | 1            | BASI_HUMAN           |
| P35613                                                                                        | 2             | 4.4375           | R.SELHIENLNMEADPGQYR.C            | 4            | BASI_HUMAN           |
| <b><i>B-cell CLL/lymphoma 7 protein family member A - Homo sapiens (Human)</i></b>            |               |                  |                                   |              |                      |
| Q4VC05                                                                                        | 2             | 4.3369           | K.MKLEASQQNSEEM#.-                | 2            | BCL7A_HUMAN          |
| Q4VC05                                                                                        | 2             | 4.1971           | K.MKLEASQQNSEEM.-                 | 2            | BCL7A_HUMAN          |
| Q4VC05                                                                                        | 2             | 3.2975           | K.M#KLEASQQNSEEM.-                | 1            | BCL7A_HUMAN          |
| Q4VC05                                                                                        | 4             | 4.7794           | K.VDRQPSGDSGLAAETSAISQDLEGVPPSKK. | 1            | BCL7A_HUMAN          |
| <b><i>B-cell lymphoma/leukemia 10 - Homo sapiens (Human)</i></b>                              |               |                  |                                   |              |                      |
| O95999                                                                                        | 3             | 4.3396           | R.ASTMVYHPEGESSTTPFFSTNSSLNLPVLEV | 1            | BCL10_HUMAN          |
| <b><i>B-cell receptor-associated protein 29 - Homo sapiens (Human)</i></b>                    |               |                  |                                   |              |                      |
| Q9UHQ4                                                                                        | 1             | 2.3953           | K.EYDQLLK.E                       | 1            | BAP29_HUMAN          |
| <b><i>B-cell receptor-associated protein 31 - Homo sapiens (Human)</i></b>                    |               |                  |                                   |              |                      |
| P51572                                                                                        | 2             | 3.8029           | K.LQAAVDGPMKKEE.-                 | 2            | BAP31_HUMAN          |
| <b><i>Bcl2 antagonist of cell death - Homo sapiens (Human)</i></b>                            |               |                  |                                   |              |                      |
| Q92934                                                                                        | 2             | 3.8061           | R.GLGPSAPAGDGPSSGSK.H             | 1            | BAD_HUMAN            |
| <b><i>Bcl-2 related ovarian killer - Homo sapiens (Human)</i></b>                             |               |                  |                                   |              |                      |
| Q9UL32                                                                                        | 2             | 2.7427           | R.AGLSWSAPERASPAGGR.L             | 1            | Q9UL32_HUMAN         |
| <b><i>BCL2/adenovirus E1B 19 kDa protein-interacting protein 3 - Homo sapiens (Human)</i></b> |               |                  |                                   |              |                      |
| Q12983                                                                                        | 2             | 3.2872           | K.NSSQSEEDDIER.R                  | 1            | BNIP3_HUMAN          |
| <b><i>Bcl-2-associated transcription factor 1 - Homo sapiens (Human)</i></b>                  |               |                  |                                   |              |                      |
| Q9NYF8                                                                                        | 2             | 2.8185           | R.FTDEESR.V                       | 1            | BCLF1_HUMAN          |
| Q9NYF8                                                                                        | 2             | 2.9627           | R.VFKEENQKGDK.K                   | 1            | BCLF1_HUMAN          |
| Q9NYF8                                                                                        | 2             | 3.1056           | R.SSFYPDGGDQETAK.T                | 1            | BCLF1_HUMAN          |

| <i>Accession No*</i>                                                                               | <i>Charge</i> | <i>XC(Max)**</i> | <i>Peptide*</i>           | <i>TC***</i> | <i>Reference No*</i> |
|----------------------------------------------------------------------------------------------------|---------------|------------------|---------------------------|--------------|----------------------|
| Q9NYF8                                                                                             | 2             | 3.2761           | R.NTEEEGLKYK.S            | 3            | BCLF1_HUMAN          |
| Q9NYF8                                                                                             | 2             | 3.0282           | R.KSVLADQGK.S             | 2            | BCLF1_HUMAN          |
| Q9NYF8                                                                                             | 3             | 3.8855           | R.FTDEESRVFLDR.G          | 1            | BCLF1_HUMAN          |
| Q9NYF8                                                                                             | 2             | 2.8521           | K.RFTDEESR.V              | 3            | BCLF1_HUMAN          |
| Q9NYF8                                                                                             | 2             | 3.8404           | K.LKETGYVVERPSTTK.D       | 1            | BCLF1_HUMAN          |
| Q9NYF8                                                                                             | 2             | 4.5275           | K.KAEGEPQEEESPLK.S        | 2            | BCLF1_HUMAN          |
| Q9NYF8                                                                                             | 2             | 3.0174           | K.FNDSEGGDTEETEDYR.Q      | 1            | BCLF1_HUMAN          |
| Q9NYF8                                                                                             | 2             | 3.5311           | K.ETGYVVERPSTTK.D         | 1            | BCLF1_HUMAN          |
| Q9NYF8                                                                                             | 1             | 2.3924           | K.SVLADQGK.S              | 2            | BCLF1_HUMAN          |
| Q9NYF8                                                                                             | 2             | 2.7628           | K.ETQSPEQVKSEK.L          | 1            | BCLF1_HUMAN          |
| <b><i>Beta-2-glycoprotein 1 precursor - Homo sapiens (Human)</i></b>                               |               |                  |                           |              |                      |
| P02749                                                                                             | 3             | 4.0776           | K.ATFGCHDGYSLDGPEEIECTK.L | 1            | APOH_HUMAN           |
| P02749                                                                                             | 2             | 3.9359           | K.TFYEPGEEITYSCKPGYVSR.G  | 3            | APOH_HUMAN           |
| P02749                                                                                             | 1             | 3.6658           | K.TDASDVKPC.-             | 14           | APOH_HUMAN           |
| P02749                                                                                             | 2             | 3.1835           | K.ATVVYQGER.V             | 6            | APOH_HUMAN           |
| P02749                                                                                             | 2             | 4.0104           | K.KATVVYQGER.V            | 3            | APOH_HUMAN           |
| <b><i>Beta-adducin - Homo sapiens (Human)</i></b>                                                  |               |                  |                           |              |                      |
| P35612                                                                                             | 3             | 4.0936           | K.KLELDGKETAPEEPGSPAK.S   | 1            | ADDB_HUMAN           |
| P35612                                                                                             | 2             | 5.6585           | K.SAGPQSQLLASVIAEK.S      | 3            | ADDB_HUMAN           |
| P35612                                                                                             | 1             | 2.2952           | K.SPLVSPSK.S              | 2            | ADDB_HUMAN           |
| <b><i>Beta-arrestin-1 - Homo sapiens (Human)</i></b>                                               |               |                  |                           |              |                      |
| P49407                                                                                             | 1             | 2.1515           | R.QFLMSDK.P               | 1            | ARRB1_HUMAN          |
| <b><i>Beta-catenin-interacting protein 1 - Homo sapiens (Human)</i></b>                            |               |                  |                           |              |                      |
| Q9NSA3                                                                                             | 2             | 3.6396           | R.EGAPGKSPEEMYIQQK.V      | 1            | CNBP1_HUMAN          |
| Q9NSA3                                                                                             | 2             | 4.1064           | K.MGSNLTASEEEFLR.T        | 1            | CNBP1_HUMAN          |
| <b><i>Betaine--homocysteine S-methyltransferase 1 - Homo sapiens (Human)</i></b>                   |               |                  |                           |              |                      |
| Q93088                                                                                             | 2             | 4.3241           | K.EATTEQQLKELFEK.Q        | 2            | BHMT1_HUMAN          |
| Q93088                                                                                             | 2             | 2.8561           | K.GTAELM#QQK.E            | 1            | BHMT1_HUMAN          |
| Q93088                                                                                             | 2             | 3.2774           | K.GTAELMQQK.E             | 1            | BHMT1_HUMAN          |
| Q93088                                                                                             | 2             | 3.2578           | K.QGFIDLPEFPFGLEPR.V      | 2            | BHMT1_HUMAN          |
| <b><i>BIN3 domain-containing protein 1 - Homo sapiens (Human)</i></b>                              |               |                  |                           |              |                      |
| Q7L2J0                                                                                             | 2             | 3.7324           | R.ESPGAAATSSSGPQAQQHR.G   | 2            | BN3D1_HUMAN          |
| Q7L2J0                                                                                             | 3             | 4.1021           | R.RGGGGTELGPAPRPR.N       | 1            | BN3D1_HUMAN          |
| <b><i>Biogenesis of lysosome-related organelles complex-1 subunit 1 - Homo sapiens (Human)</i></b> |               |                  |                           |              |                      |
| P78537                                                                                             | 2             | 3.5052           | R.TIATALEYVYK.G           | 2            | BL1S1_HUMAN          |

| <i>Accession No*</i>                                                                               | <i>Charge</i> | <i>XC(Max)**</i> | <i>Peptide*</i>                   | <i>TC***</i> | <i>Reference No*</i> |
|----------------------------------------------------------------------------------------------------|---------------|------------------|-----------------------------------|--------------|----------------------|
| <b><i>Biogenesis of lysosome-related organelles complex-1 subunit 3 - Homo sapiens (Human)</i></b> |               |                  |                                   |              |                      |
| Q6QNY0                                                                                             | 2             | 4.4885           | R.VAGEAAETDSEPEPEPEPTAAPR.D       | 3            | BL1S3_HUMAN          |
| <b><i>Biotinidase precursor - Homo sapiens (Human)</i></b>                                         |               |                  |                                   |              |                      |
| P43251                                                                                             | 2             | 2.7646           | R.TSIYPFLDFMPSPQVVR.W             | 1            | BTD_HUMAN            |
| <b><i>Bisphosphoglycerate mutase - Homo sapiens (Human)</i></b>                                    |               |                  |                                   |              |                      |
| P07738                                                                                             | 2             | 4.6293           | R.AVGPHQFLGDQEAIAAIK.K            | 4            | PMGE_HUMAN           |
| <b><i>BMP-2-inducible protein kinase - Homo sapiens (Human)</i></b>                                |               |                  |                                   |              |                      |
| Q9NSY1                                                                                             | 2             | 4.2319           | R.VLQQLQQGDWR.L                   | 2            | BMP2K_HUMAN          |
| Q9NSY1                                                                                             | 2             | 5.2646           | R.SVADKEAIANFTNQK.N               | 2            | BMP2K_HUMAN          |
| Q9NSY1                                                                                             | 2             | 3.8731           | K.SESNEDLFLVFPFEITGSQQQK.V        | 1            | BMP2K_HUMAN          |
| Q9NSY1                                                                                             | 3             | 3.9698           | K.NLPQHRFPAAGLEQEEFVFTK.A         | 1            | BMP2K_HUMAN          |
| Q9NSY1                                                                                             | 2             | 3.0067           | K.KTSVQGGVQK.G                    | 1            | BMP2K_HUMAN          |
| Q9NSY1                                                                                             | 4             | 4.8099           | K.KVNVQECHAVGPEAHTIPGYPK.S        | 1            | BMP2K_HUMAN          |
| <b><i>BNIP2 motif-containing molecule at the C-terminal region 1 - Homo sapiens (Human)</i></b>    |               |                  |                                   |              |                      |
| Q58A63                                                                                             | 3             | 3.9633           | R.AGPDAVTHDNEWEMLSQPQVQK.N        | 1            | BMCC1_HUMAN          |
| <b><i>BolA-like protein 1 - Homo sapiens (Human)</i></b>                                           |               |                  |                                   |              |                      |
| Q9Y3E2                                                                                             | 2             | 3.046            | R.FEGLSPLQR.H                     | 1            | BOLA1_HUMAN          |
| Q9Y3E2                                                                                             | 3             | 5.0264           | R.TKLEEALSPEVLELRNESGGHAVPPGSETHF | 2            | BOLA1_HUMAN          |
| <b><i>Brain acid soluble protein 1 - Homo sapiens (Human)</i></b>                                  |               |                  |                                   |              |                      |
| P80723                                                                                             | 2             | 3.0181           | K.GYNVNDEKAK.E                    | 2            | BASP_HUMAN           |
| P80723                                                                                             | 2             | 4.5729           | K.AEGAATEEEGTPK.E                 | 3            | BASP_HUMAN           |
| P80723                                                                                             | 2             | 5.0985           | K.KTEAPAAPAAQETK.S                | 1            | BASP_HUMAN           |
| P80723                                                                                             | 2             | 4.2787           | K.SDGAPASDSKPGSSEAAPSSK.E         | 7            | BASP_HUMAN           |
| P80723                                                                                             | 3             | 5.7449           | K.AQGPAASAEKPKVEAPAANSQDQTVTVKE.- | 2            | BASP_HUMAN           |
| P80723                                                                                             | 3             | 5.9681           | K.AEGAATEEEGTPKESEPQAAAEPAEAK.E   | 2            | BASP_HUMAN           |
| P80723                                                                                             | 3             | 4.5679           | K.AEPPKAPEQEQAAPGPAAGGEAPK.A      | 2            | BASP_HUMAN           |
| P80723                                                                                             | 2             | 3.3777           | K.ETPAATEAPSSTPK.A                | 5            | BASP_HUMAN           |
| <b><i>Brain-specific polypeptide PEP-19 - Homo sapiens (Human)</i></b>                             |               |                  |                                   |              |                      |
| P48539                                                                                             | 2             | 2.7599           | R.AAVAIQSQFR.K                    | 1            | PEP19_HUMAN          |
| <b><i>BRCA2 and CDKN1A-interacting protein - Homo sapiens (Human)</i></b>                          |               |                  |                                   |              |                      |
| Q9P287                                                                                             | 2             | 2.7524           | K.LLQQLFLK.A                      | 1            | BCCIP_HUMAN          |
| <b><i>Breast carcinoma amplified sequence 2 - Homo sapiens (Human)</i></b>                         |               |                  |                                   |              |                      |
| O75934                                                                                             | 2             | 3.3671           | R.TIVQLENEIYQIK.Q                 | 2            | BCAS2_HUMAN          |
| <b><i>Bridging integrator 2 - Homo sapiens (Human)</i></b>                                         |               |                  |                                   |              |                      |
| Q9UBW5                                                                                             | 2             | 4.0155           | R.TSLEVSPNPEPPEKPV.R              | 7            | BIN2_HUMAN           |

| <i>Accession No*</i>                                                                         | <i>Charge</i> | <i>XC(Max)**</i> | <i>Peptide*</i>                   | <i>TC***</i> | <i>Reference No*</i> |
|----------------------------------------------------------------------------------------------|---------------|------------------|-----------------------------------|--------------|----------------------|
| Q9UBW5                                                                                       | 3             | 5.2264           | R.ATASPRPSSGNIPSSPTASGGGSPTSPR.A  | 2            | BIN2_HUMAN           |
| <b><i>Bromodomain and PHD finger-containing protein 3 - Homo sapiens (Human)</i></b>         |               |                  |                                   |              |                      |
| Q9ULD4                                                                                       | 2             | 3.0641           | R.EQDEKTSAVKEELK.Y                | 1            | BRPF3_HUMAN          |
| <b><i>Bromodomain-containing protein 4 - Homo sapiens (Human)</i></b>                        |               |                  |                                   |              |                      |
| O60885                                                                                       | 2             | 4.4262           | R.SREDEDALEQAR.R                  | 2            | BRD4_HUMAN           |
| O60885                                                                                       | 2             | 2.8959           | R.AASVVQPQLVAVVKEEK.I             | 1            | BRD4_HUMAN           |
| <b><i>Bromodomain-containing protein 8 - Homo sapiens (Human)</i></b>                        |               |                  |                                   |              |                      |
| Q9H0E9                                                                                       | 2             | 3.4609           | K.LLSTGPTPEWSIR.E                 | 3            | BRD8_HUMAN           |
| <b><i>BTB/POZ domain-containing protein KCTD18 - Homo sapiens (Human)</i></b>                |               |                  |                                   |              |                      |
| Q6PI47                                                                                       | 2             | 3.8169           | K.NSASVTVSPASAIQTSAGATANR.F       | 2            | KCD18_HUMAN          |
| <b><i>BUD13 homolog - Homo sapiens (Human)</i></b>                                           |               |                  |                                   |              |                      |
| Q9BRD0                                                                                       | 2             | 2.9953           | K.ATSDLSPPR.H                     | 2            | BUD13_HUMAN          |
| Q9BRD0                                                                                       | 2             | 3.2003           | K.TGLVLTDIQR.E                    | 1            | BUD13_HUMAN          |
| Q9BRD0                                                                                       | 2             | 3.6399           | R.HGSSDISSPR.R                    | 2            | BUD13_HUMAN          |
| <b><i>Butyrate response factor 1 - Homo sapiens (Human)</i></b>                              |               |                  |                                   |              |                      |
| Q07352                                                                                       | 2             | 3.0366           | K.QPGGGQVNSSR.Y                   | 1            | TISB_HUMAN           |
| <b><i>C4b-binding protein alpha chain precursor - Homo sapiens (Human)</i></b>               |               |                  |                                   |              |                      |
| P04003                                                                                       | 2             | 4.0149           | K.LSLEIEQLELQR.D                  | 1            | C4BP_HUMAN           |
| P04003                                                                                       | 1             | 2.1989           | K.MALEVYK.L                       | 1            | C4BP_HUMAN           |
| P04003                                                                                       | 2             | 2.7717           | R.LMQCLPNPEDVK.M                  | 1            | C4BP_HUMAN           |
| <b><i>C4b-binding protein beta chain precursor - Homo sapiens (Human)</i></b>                |               |                  |                                   |              |                      |
| P20851                                                                                       | 1             | 3.1167           | K.ALLAFQESK.N                     | 4            | C4BB_HUMAN           |
| P20851                                                                                       | 2             | 3.635            | K.LIQEAPKPECEK.A                  | 2            | C4BB_HUMAN           |
| <b><i>C7 protein - Homo sapiens (Human)</i></b>                                              |               |                  |                                   |              |                      |
| A0M8Q6                                                                                       | 3             | 3.7655           | R.VTHEGSTVEK.T                    | 2            | A0M8Q6_HUMA          |
| <b><i>Cadherin EGF LAG seven-pass G-type receptor 1 precursor - Homo sapiens (Human)</i></b> |               |                  |                                   |              |                      |
| Q9NYQ6                                                                                       | 2             | 3.4967           | R.TGSAQADGSDSEKP.-                | 1            | CELR1_HUMAN          |
| <b><i>Cadherin-11 precursor - Homo sapiens (Human)</i></b>                                   |               |                  |                                   |              |                      |
| P55287                                                                                       | 3             | 4.8952           | K.EDIRDNIVSYNDEGGGEEDTQAFDIGTLR.N | 1            | CAD11_HUMAN          |
| P55287                                                                                       | 3             | 4.5038           | R.HTDLDRFFFTINPEDGFIK.T           | 2            | CAD11_HUMAN          |
| P55287                                                                                       | 3             | 3.802            | R.VHAKDPDAANSPIR.Y                | 1            | CAD11_HUMAN          |
| <b><i>Cadherin-13 precursor - Homo sapiens (Human)</i></b>                                   |               |                  |                                   |              |                      |
| P55290                                                                                       | 2             | 3.4957           | K.DIQGSLQDIFK.F                   | 3            | CAD13_HUMAN          |
| P55290                                                                                       | 2             | 2.7552           | R.YEVSSPYFK.V                     | 1            | CAD13_HUMAN          |
| P55290                                                                                       | 2             | 3.8718           | R.TPHAEDMAELVIVGGK.D              | 2            | CAD13_HUMAN          |

| <i>Accession No*</i>                                       | <i>Charge</i> | <i>XC(Max)**</i> | <i>Peptide*</i>                   | <i>TC***</i> | <i>Reference No*</i> |
|------------------------------------------------------------|---------------|------------------|-----------------------------------|--------------|----------------------|
| P55290                                                     | 2             | 4.0999           | R.SIVVSPILIPENQR.Q                | 5            | CAD13_HUMAN          |
| P55290                                                     | 2             | 3.9592           | R.M#TAFDADDPATDNALLR.Y            | 2            | CAD13_HUMAN          |
| P55290                                                     | 2             | 4.3333           | R.INENTGSVSVTR.T                  | 6            | CAD13_HUMAN          |
| P55290                                                     | 2             | 3.3306           | R.DVGKVVDSDRPER.S                 | 2            | CAD13_HUMAN          |
| P55290                                                     | 2             | 3.9097           | K.RSIVVSPILIPENQR.Q               | 1            | CAD13_HUMAN          |
| P55290                                                     | 2             | 4.3427           | K.VNSDGGGLVALR.N                  | 2            | CAD13_HUMAN          |
| <b><i>Cadherin-16 precursor - Homo sapiens (Human)</i></b> |               |                  |                                   |              |                      |
| O75309                                                     | 2             | 4.32             | R.EGAEGQIVLSGDSGK.A               | 2            | CAD16_HUMAN          |
| O75309                                                     | 2             | 4.4329           | R.AFQVDPTSGSVTLGVLPLR.A           | 1            | CAD16_HUMAN          |
| O75309                                                     | 2             | 3.4678           | K.ATEGPFAMDPDSGFLLVTR.A           | 1            | CAD16_HUMAN          |
| O75309                                                     | 3             | 5.6935           | R.LSAEDADAPGSPNSHVVYQLLSPEPEDGVEG | 1            | CAD16_HUMAN          |
| <b><i>Cadherin-2 precursor - Homo sapiens (Human)</i></b>  |               |                  |                                   |              |                      |
| P19022                                                     | 2             | 2.9489           | R.YMQQNIR.Y                       | 1            | CADH2_HUMAN          |
| P19022                                                     | 3             | 5.6061           | K.FLEAGIYEVPIIITDSGNPPK.S         | 3            | CADH2_HUMAN          |
| P19022                                                     | 4             | 4.9492           | K.IIRQEEGLHAGTMLTFTAQDPDRYMQQNIR. | 1            | CADH2_HUMAN          |
| P19022                                                     | 2             | 2.8281           | K.LSDPANWLK.I                     | 1            | CADH2_HUMAN          |
| P19022                                                     | 2             | 3.01             | R.GPFPQELVR.I                     | 2            | CADH2_HUMAN          |
| P19022                                                     | 1             | 2.1591           | R.ISGGDPTGR.F                     | 1            | CADH2_HUMAN          |
| P19022                                                     | 2             | 4.0359           | R.LNGDFAQLNLK.I                   | 3            | CADH2_HUMAN          |
| P19022                                                     | 2             | 3.4311           | R.M#FVLTVA AENQVPLAK.G            | 1            | CADH2_HUMAN          |
| <b><i>Cadherin-5 precursor - Homo sapiens (Human)</i></b>  |               |                  |                                   |              |                      |
| P33151                                                     | 2             | 3.1732           | R.TSDKGQFFR.V                     | 2            | CADH5_HUMAN          |
| P33151                                                     | 3             | 4.5346           | K.KPLIGTVLAMDPDAAR.H              | 4            | CADH5_HUMAN          |
| P33151                                                     | 2             | 2.7441           | K.ELDSTGTPTGK.E                   | 4            | CADH5_HUMAN          |
| P33151                                                     | 2             | 3.0493           | K.KGDIYNEK.E                      | 2            | CADH5_HUMAN          |
| <b><i>Cadherin-6 precursor - Homo sapiens (Human)</i></b>  |               |                  |                                   |              |                      |
| P55285                                                     | 2             | 2.7404           | R.DNTDVRDFINQR.L                  | 1            | CADH6_HUMAN          |
| P55285                                                     | 2             | 4.3121           | R.IVVEDVDEPPVFSK.L                | 5            | CADH6_HUMAN          |
| P55285                                                     | 2             | 4.0043           | K.YILSGDGAGDLFIINENTGDIQATK.R     | 1            | CADH6_HUMAN          |
| P55285                                                     | 1             | 2.9402           | R.FLYLGPFK.D                      | 5            | CADH6_HUMAN          |
| P55285                                                     | 2             | 4.0982           | R.TGRPVEPESEFIIK.I                | 2            | CADH6_HUMAN          |
| P55285                                                     | 2             | 3.5711           | R.DIVPEALFLPR.R                   | 2            | CADH6_HUMAN          |
| P55285                                                     | 2             | 2.8227           | R.FLYLGPFKDSATVR.I                | 1            | CADH6_HUMAN          |
| P55285                                                     | 2             | 3.9051           | K.VEASNPYVEPR.F                   | 4            | CADH6_HUMAN          |
| P55285                                                     | 2             | 3.6561           | K.TPESSPPGTPIGR.I                 | 5            | CADH6_HUMAN          |

| <i>Accession No*</i>                                                                                | <i>Charge</i> | <i>XC(Max)**</i> | <i>Peptide*</i>           | <i>TC***</i> | <i>Reference No*</i> |
|-----------------------------------------------------------------------------------------------------|---------------|------------------|---------------------------|--------------|----------------------|
| P55285                                                                                              | 2             | 4.3125           | K.LHSDQDRGDGSLK.Y         | 2            | CADH6_HUMAN          |
| P55285                                                                                              | 2             | 3.3835           | K.LAYILQIR.E              | 3            | CADH6_HUMAN          |
| P55285                                                                                              | 2             | 3.7447           | K.LADM#YGGVDSKDS.-        | 2            | CADH6_HUMAN          |
| P55285                                                                                              | 2             | 4.6542           | K.IHDINDNEPIFTK.E         | 3            | CADH6_HUMAN          |
| P55285                                                                                              | 2             | 3.0329           | K.VVYSILQGQPYFSVESETGIK.T | 1            | CADH6_HUMAN          |
| <b><i>Cadherin-related tumor suppressor homolog precursor - Homo sapiens (Human)</i></b>            |               |                  |                           |              |                      |
| Q14517                                                                                              | 2             | 2.9282           | R.DM#PAAGSLGSSSR.N        | 2            | FATH_HUMAN           |
| <b><i>Calbindin - Homo sapiens (Human)</i></b>                                                      |               |                  |                           |              |                      |
| P05937                                                                                              | 2             | 3.4264           | K.LFDSNNDGKLELTEMAR.L     | 2            | CALB1_HUMAN          |
| P05937                                                                                              | 3             | 5.2749           | K.NKQDLINNITTYKK.N        | 2            | CALB1_HUMAN          |
| P05937                                                                                              | 2             | 3.7945           | K.TVDDTKLAEYTDMLK.L       | 1            | CALB1_HUMAN          |
| P05937                                                                                              | 2             | 3.6989           | K.ELQNLIQELQQR.K          | 1            | CALB1_HUMAN          |
| <b><i>Calcitonin gene-related peptide type 1 receptor precursor - Homo sapiens (Human)</i></b>      |               |                  |                           |              |                      |
| Q16602                                                                                              | 2             | 3.2538           | K.IQFGNSFSNSEALR.S        | 1            | CALRL_HUMAN          |
| <b><i>Calcium/calmodulin-dependent protein kinase II inhibitor alpha - Homo sapiens (Human)</i></b> |               |                  |                           |              |                      |
| Q7Z7J9                                                                                              | 2             | 4.1144           | R.LQDTNFFGAGQNK.R         | 2            | Q7Z7J9_HUMAN         |
| <b><i>Calcium-regulated heat stable protein 1 - Homo sapiens (Human)</i></b>                        |               |                  |                           |              |                      |
| Q9Y2V2                                                                                              | 2             | 2.7476           | R.ASQGPVYK.G              | 2            | CHSP1_HUMAN          |
| Q9Y2V2                                                                                              | 2             | 4.6949           | K.LQAVEVVITHLAPGTK.H      | 1            | CHSP1_HUMAN          |
| Q9Y2V2                                                                                              | 2             | 3.2544           | K.HETWSGHVISS.-           | 1            | CHSP1_HUMAN          |
| Q9Y2V2                                                                                              | 1             | 2.1802           | R.TFSATVR.A               | 2            | CHSP1_HUMAN          |
| <b><i>Caldesmon - Homo sapiens (Human)</i></b>                                                      |               |                  |                           |              |                      |
| Q05682                                                                                              | 3             | 4.0982           | R.IAYQRNDDDEEEAARER.R     | 3            | CALD1_HUMAN          |
| Q05682                                                                                              | 2             | 2.8327           | R.LKEEIERR.R              | 1            | CALD1_HUMAN          |
| Q05682                                                                                              | 2             | 2.7509           | R.LKEEIER.R               | 4            | CALD1_HUMAN          |
| Q05682                                                                                              | 2             | 4.6997           | R.LEQYTSIAIEGTK.S         | 10           | CALD1_HUMAN          |
| Q05682                                                                                              | 2             | 3.4065           | R.KVLEEEEQRR.K            | 2            | CALD1_HUMAN          |
| Q05682                                                                                              | 2             | 4.2498           | R.KVLEEEEQR.R             | 8            | CALD1_HUMAN          |
| Q05682                                                                                              | 1             | 2.5953           | R.KKGFTEVK.S              | 4            | CALD1_HUMAN          |
| Q05682                                                                                              | 2             | 5.7877           | R.ASVDTKEAEGAPQVEAGK.R    | 8            | CALD1_HUMAN          |
| Q05682                                                                                              | 2             | 3.5596           | R.RKVLEEEEQR.R            | 1            | CALD1_HUMAN          |
| Q05682                                                                                              | 2             | 4.581            | R.IAYQRNDDDEEEAAR.E       | 10           | CALD1_HUMAN          |
| Q05682                                                                                              | 2             | 3.8936           | R.GETESEEFELK.Q           | 5            | CALD1_HUMAN          |
| Q05682                                                                                              | 2             | 3.3038           | R.GETESEFEK.L             | 2            | CALD1_HUMAN          |
| Q05682                                                                                              | 3             | 4.9488           | R.ASVDTKEAEGAPQVEAGKR.L   | 6            | CALD1_HUMAN          |

| <i>Accession No*</i> | <i>Charge</i> | <i>XC(Max)**</i> | <i>Peptide*</i>         | <i>TC***</i> | <i>Reference No*</i> |
|----------------------|---------------|------------------|-------------------------|--------------|----------------------|
| Q05682               | 2             | 3.7146           | R.M#QNDAENETTEK.E       | 1            | CALD1_HUMAN          |
| Q05682               | 2             | 3.7061           | R.IEAEKAAAQER.E         | 1            | CALD1_HUMAN          |
| Q05682               | 2             | 4.3107           | R.M#QNDAENETTEKEEK.S    | 9            | CALD1_HUMAN          |
| Q05682               | 3             | 5.0608           | R.M#QNDAENETTEKEEKSES.R | 4            | CALD1_HUMAN          |
| Q05682               | 2             | 5.0408           | R.MQNDAENETTEK.E        | 7            | CALD1_HUMAN          |
| Q05682               | 2             | 4.8676           | R.MQNDAENETTEKEEK.S     | 5            | CALD1_HUMAN          |
| Q05682               | 1             | 3.1494           | R.YEIEETETVTK.S         | 8            | CALD1_HUMAN          |
| Q05682               | 2             | 4.4105           | R.MQNDAENETTEKEEKSES.R  | 3            | CALD1_HUMAN          |
| Q05682               | 1             | 2.1882           | K.KGFTEVK.S             | 1            | CALD1_HUMAN          |
| Q05682               | 2             | 4.0649           | R.QERYEIEETETVTK.S      | 5            | CALD1_HUMAN          |
| Q05682               | 2             | 3.5347           | R.RGETESEEFELK.Q        | 3            | CALD1_HUMAN          |
| Q05682               | 2             | 2.9206           | R.RLKEEIER.R            | 2            | CALD1_HUMAN          |
| Q05682               | 3             | 5.2442           | R.RM#QNDAENETTEKEEK.S   | 3            | CALD1_HUMAN          |
| Q05682               | 2             | 6.9552           | R.RMQNDAENETTEKEEK.S    | 4            | CALD1_HUMAN          |
| Q05682               | 2             | 2.8038           | R.RRGETESEEFELK.L       | 1            | CALD1_HUMAN          |
| Q05682               | 1             | 3.1948           | K.VLEEEQR.R             | 7            | CALD1_HUMAN          |
| Q05682               | 2             | 3.6053           | R.RGETESEEFELK.L        | 8            | CALD1_HUMAN          |
| Q05682               | 2             | 2.7352           | K.MPEDGLSDDK.K          | 1            | CALD1_HUMAN          |
| Q05682               | 2             | 2.7245           | K.LQEDKPTFK.K           | 1            | CALD1_HUMAN          |
| Q05682               | 2             | 3.1496           | K.DKEPKEEVK.S           | 7            | CALD1_HUMAN          |
| Q05682               | 2             | 3.5712           | K.EAEGAPQVEAGK.R        | 7            | CALD1_HUMAN          |
| Q05682               | 2             | 3.1432           | K.EAEGAPQVEAGKR.L       | 3            | CALD1_HUMAN          |
| Q05682               | 2             | 3.2567           | K.GSSLKIEER.A           | 4            | CALD1_HUMAN          |
| Q05682               | 2             | 3.0342           | K.HTENTFSRPGGR.A        | 1            | CALD1_HUMAN          |
| Q05682               | 2             | 4.6599           | K.IDSRLEQYTSIAIEGTK.S   | 16           | CALD1_HUMAN          |
| Q05682               | 2             | 2.8711           | K.IEERAFLNK.S           | 2            | CALD1_HUMAN          |
| Q05682               | 3             | 3.8924           | K.KAQEDKLQTAVLK.K       | 1            | CALD1_HUMAN          |
| Q05682               | 2             | 3.2651           | K.VEQKIEGK.W            | 7            | CALD1_HUMAN          |
| Q05682               | 2             | 3.2542           | K.M#PEDGLSDDKPKFK.C     | 2            | CALD1_HUMAN          |
| Q05682               | 2             | 3.8014           | K.MPEDGLSDDKPKFK.C      | 2            | CALD1_HUMAN          |
| Q05682               | 3             | 4.1594           | K.NDWRDAEENKK.E         | 1            | CALD1_HUMAN          |
| Q05682               | 2             | 3.4931           | K.SPAPKPSDLRPGDVSSK.R   | 2            | CALD1_HUMAN          |
| Q05682               | 2             | 4.067            | K.TTESQEETVMSLK.N       | 3            | CALD1_HUMAN          |
| Q05682               | 2             | 3.1466           | K.STHQAAIVSK.I          | 8            | CALD1_HUMAN          |
| Q05682               | 2             | 3.1266           | K.LKHTENTFSRPGGR.A      | 2            | CALD1_HUMAN          |
| Q05682               | 2             | 3.2504           | K.SQNGEFM#THK.L         | 4            | CALD1_HUMAN          |



| <i>Accession No*</i>                                                                     | <i>Charge</i> | <i>XC(Max)**</i> | <i>Peptide*</i>                    | <i>TC***</i> | <i>Reference No*</i> |
|------------------------------------------------------------------------------------------|---------------|------------------|------------------------------------|--------------|----------------------|
| Q05682                                                                                   | 2             | 3.2373           | K.PSDLRPGDVSSK.R                   | 2            | CALD1_HUMAN          |
| Q05682                                                                                   | 2             | 4.0151           | K.SESRQERYEIEETETVTK.S             | 4            | CALD1_HUMAN          |
| Q05682                                                                                   | 3             | 5.4809           | K.SAKPTKPAASDLPVPAEGVR.N           | 22           | CALD1_HUMAN          |
| Q05682                                                                                   | 2             | 3.2615           | K.REEMRLEAER.I                     | 1            | CALD1_HUMAN          |
| Q05682                                                                                   | 2             | 2.7826           | K.REEM#RLEAER.I                    | 1            | CALD1_HUMAN          |
| Q05682                                                                                   | 2             | 3.0077           | K.QQEAALLELEELK.K                  | 2            | CALD1_HUMAN          |
| Q05682                                                                                   | 2             | 3.0476           | K.QQEAALLELEELK.K                  | 1            | CALD1_HUMAN          |
| Q05682                                                                                   | 2             | 4.2148           | K.QKQQAALLELEELK.K                 | 7            | CALD1_HUMAN          |
| Q05682                                                                                   | 2             | 3.4055           | K.QKQQAALLELEELK.K                 | 2            | CALD1_HUMAN          |
| Q05682                                                                                   | 2             | 2.7365           | K.SQNGEFMTHK.L                     | 1            | CALD1_HUMAN          |
| <b><i>Calmin - Homo sapiens (Human)</i></b>                                              |               |                  |                                    |              |                      |
| Q96JQ2                                                                                   | 2             | 3.4852           | K.FNSDLIDFASTSQAFNK.V              | 1            | CLMN_HUMAN           |
| Q96JQ2                                                                                   | 2             | 3.1418           | K.TSDISEPSPESSILSSR.K              | 1            | CLMN_HUMAN           |
| <b><i>Calmodulin - Homo sapiens (Human)</i></b>                                          |               |                  |                                    |              |                      |
| P62158                                                                                   | 3             | 3.8719           | R.EADIDGDGQVNYEEFVQM#MTAK.-        | 1            | CALM_HUMAN           |
| P62158                                                                                   | 3             | 5.576            | R.EADIDGDGQVNYEEFVQMM#TAK.-        | 2            | CALM_HUMAN           |
| P62158                                                                                   | 2             | 4.288            | R.EADIDGDGQVNYEEFVQMMTAK.-         | 41           | CALM_HUMAN           |
| <b><i>Calmodulin-like protein 3 - Homo sapiens (Human)</i></b>                           |               |                  |                                    |              |                      |
| P27482                                                                                   | 2             | 3.1442           | R.SLGQNPTAEALR.D                   | 2            | CALL3_HUMAN          |
| P27482                                                                                   | 2             | 2.8595           | K.LSDEEVDDEMIR.A                   | 2            | CALL3_HUMAN          |
| P27482                                                                                   | 2             | 3.1927           | R.AADTDGDGQVNYEEFVR.V              | 2            | CALL3_HUMAN          |
| <b><i>Calmodulin-like protein 5 - Homo sapiens (Human)</i></b>                           |               |                  |                                    |              |                      |
| Q9NZT1                                                                                   | 3             | 6.4726           | K.AFSAVDTDGNGTINAQELGAALK.A        | 4            | CALL5_HUMAN          |
| <b><i>Calmodulin-regulated spectrin-associated protein 1. - Homo sapiens (Human)</i></b> |               |                  |                                    |              |                      |
| Q5T5Y3                                                                                   | 2             | 3.882            | K.ISQQQEQLLMK.S                    | 2            | Q5T5Y3_HUMAN         |
| Q5T5Y3                                                                                   | 2             | 3.9734           | K.LNETISTLQQAILK.I                 | 1            | Q5T5Y3_HUMAN         |
| Q5T5Y3                                                                                   | 2             | 2.7118           | K.SIQGEDIPDQR.H                    | 1            | Q5T5Y3_HUMAN         |
| Q5T5Y3                                                                                   | 3             | 4.6923           | R.TPTDPGLDSALEPSGDPHGK.C           | 5            | Q5T5Y3_HUMAN         |
| <b><i>Calnexin precursor - Homo sapiens (Human)</i></b>                                  |               |                  |                                    |              |                      |
| P27824                                                                                   | 3             | 4.7412           | R.KIPNPDFFEDLEPFR.M                | 2            | CALX_HUMAN           |
| <b><i>Calpain-1 catalytic subunit - Homo sapiens (Human)</i></b>                         |               |                  |                                    |              |                      |
| P07384                                                                                   | 2             | 2.9606           | K.YLGQDYEQLR.V                     | 1            | CAN1_HUMAN           |
| <b><i>Calpastatin - Homo sapiens (Human)</i></b>                                         |               |                  |                                    |              |                      |
| P20810                                                                                   | 2             | 3.6729           | K.AIPVSQQMEGPHLPNK.K               | 3            | ICAL_HUMAN           |
| P20810                                                                                   | 3             | 6.0136           | K.EGITGPPADSSKPIGPDDAIDALSSDFTCGSP | 1            | ICAL_HUMAN           |

| <i>Accession No*</i>                            | <i>Charge</i> | <i>XC(Max)**</i> | <i>Peptide*</i>               | <i>TC***</i> | <i>Reference No*</i> |
|-------------------------------------------------|---------------|------------------|-------------------------------|--------------|----------------------|
| P20810                                          | 2             | 3.0679           | K.AIPVSQQM#EGPHLPNK.K         | 1            | ICAL_HUMAN           |
| <b><i>Calponin-1 - Homo sapiens (Human)</i></b> |               |                  |                               |              |                      |
| P51911                                          | 2             | 3.0425           | K.LAQKYDHQR.E                 | 1            | CNN1_HUMAN           |
| P51911                                          | 2             | 2.9202           | R.IGNNFMDGLK.D                | 1            | CNN1_HUMAN           |
| P51911                                          | 2             | 3.5124           | R.GPAYGLSAEVK.N               | 3            | CNN1_HUMAN           |
| P51911                                          | 1             | 3.4509           | R.GMTVYGLPR.Q                 | 5            | CNN1_HUMAN           |
| P51911                                          | 2             | 3.2996           | R.GM#TVYGLPR.Q                | 2            | CNN1_HUMAN           |
| P51911                                          | 2             | 3.4249           | R.NIIGLQMGTNK.F               | 2            | CNN1_HUMAN           |
| P51911                                          | 2             | 4.8568           | K.LGTDQPLDQATISLQM#GTNK.G     | 2            | CNN1_HUMAN           |
| P51911                                          | 2             | 3.4892           | R.NIIGLQM#GTNK.F              | 3            | CNN1_HUMAN           |
| P51911                                          | 2             | 4.271            | K.GASQAGMTAPGTKR.Q            | 4            | CNN1_HUMAN           |
| P51911                                          | 2             | 4.4169           | K.GASQAGMTAPGTK.R             | 7            | CNN1_HUMAN           |
| P51911                                          | 2             | 3.2283           | K.GASQAGM#TAPGTKR.Q           | 5            | CNN1_HUMAN           |
| P51911                                          | 2             | 3.8669           | K.GASQAGM#TAPGTK.R            | 3            | CNN1_HUMAN           |
| P51911                                          | 2             | 4.1033           | K.FASQQGMTAYGTR.R             | 8            | CNN1_HUMAN           |
| P51911                                          | 2             | 3.735            | K.FASQQGM#TAYGTR.R            | 6            | CNN1_HUMAN           |
| P51911                                          | 3             | 5.1869           | K.LGTDQPLDQATISLQMGTNK.G      | 2            | CNN1_HUMAN           |
| P51911                                          | 2             | 4.4008           | K.INESTQNWHQLENIGNFIK.A       | 1            | CNN1_HUMAN           |
| <b><i>Calponin-2 - Homo sapiens (Human)</i></b> |               |                  |                               |              |                      |
| Q99439                                          | 3             | 3.9143           | K.NHILPPMDHSTISLQM#GTNK.C     | 1            | CNN2_HUMAN           |
| Q99439                                          | 3             | 3.7701           | K.NHILPPMDHSTISLQMGTNK.C      | 1            | CNN2_HUMAN           |
| Q99439                                          | 2             | 3.6645           | R.TWIEGLTGLSIGPDFQK.G         | 2            | CNN2_HUMAN           |
| <b><i>Calponin-3 - Homo sapiens (Human)</i></b> |               |                  |                               |              |                      |
| Q15417                                          | 3             | 5.6028           | K.M#QTDKPFQTTISLQM#GTNK.G     | 5            | CNN3_HUMAN           |
| Q15417                                          | 3             | 6.5828           | R.DIYDQKLTLPVDNSTISLQM#GTNK.V | 2            | CNN3_HUMAN           |
| Q15417                                          | 2             | 5.2281           | K.AGQSVIGLQMGTNK.C            | 6            | CNN3_HUMAN           |
| Q15417                                          | 1             | 2.2462           | R.DIYDQK.L                    | 4            | CNN3_HUMAN           |
| Q15417                                          | 2             | 3.4124           | R.DYQYSDQGIDY.-               | 1            | CNN3_HUMAN           |
| Q15417                                          | 3             | 5.3162           | K.MQTDKPFQTTISLQMGTNK.G       | 7            | CNN3_HUMAN           |
| Q15417                                          | 3             | 5.4805           | K.MQTDKPFQTTISLQM#GTNK.G      | 5            | CNN3_HUMAN           |
| Q15417                                          | 3             | 5.5689           | K.M#QTDKPFQTTISLQMGTNK.G      | 5            | CNN3_HUMAN           |
| Q15417                                          | 2             | 5.4469           | K.LTLQPVDNSTISLQM#GTNK.V      | 13           | CNN3_HUMAN           |
| Q15417                                          | 2             | 3.52             | K.GMSVYGLGR.Q                 | 10           | CNN3_HUMAN           |
| Q15417                                          | 2             | 3.3876           | K.GM#SVYGLGR.Q                | 5            | CNN3_HUMAN           |
| Q15417                                          | 2             | 3.0821           | K.GASQAGMLAPGTRR.D            | 3            | CNN3_HUMAN           |

| <i>Accession No*</i>                                                      | <i>Charge</i> | <i>XC(Max)**</i> | <i>Peptide*</i>                  | <i>TC***</i> | <i>Reference No*</i> |
|---------------------------------------------------------------------------|---------------|------------------|----------------------------------|--------------|----------------------|
| Q15417                                                                    | 2             | 3.2638           | K.GASQAGM#LAPGTR.R               | 2            | CNN3_HUMAN           |
| Q15417                                                                    | 2             | 4.7924           | K.AGQSVIGLQM#GTNK.C              | 4            | CNN3_HUMAN           |
| Q15417                                                                    | 2             | 3.0737           | K.LTLQPVDNSTISLQMGTK.V           | 1            | CNN3_HUMAN           |
| Q15417                                                                    | 2             | 3.8172           | K.GASQAGMLAPGTR.R                | 3            | CNN3_HUMAN           |
| <b><i>Calreticulin precursor - Homo sapiens (Human)</i></b>               |               |                  |                                  |              |                      |
| P27797                                                                    | 2             | 4.092            | K.IDNSQVESGSLEDDWDFLPPK.K        | 5            | CALR_HUMAN           |
| P27797                                                                    | 2             | 5.5177           | R.FYALSASFEPFSNK.G               | 7            | CALR_HUMAN           |
| P27797                                                                    | 1             | 2.8118           | K.VHVIFNYK.G                     | 3            | CALR_HUMAN           |
| P27797                                                                    | 2             | 3.8153           | K.SDFGKFVLSGK.F                  | 2            | CALR_HUMAN           |
| P27797                                                                    | 1             | 2.2654           | K.NVLINK.D                       | 2            | CALR_HUMAN           |
| P27797                                                                    | 1             | 2.5944           | K.KVHVIFNYK.G                    | 1            | CALR_HUMAN           |
| P27797                                                                    | 3             | 4.4073           | K.IDNSQVESGSLEDDWDFLPPK.I        | 11           | CALR_HUMAN           |
| P27797                                                                    | 2             | 4.8963           | K.HEQNIDCGGGYVK.L                | 8            | CALR_HUMAN           |
| P27797                                                                    | 2             | 3.3867           | K.GKNVLINK.D                     | 3            | CALR_HUMAN           |
| P27797                                                                    | 2             | 5.9125           | K.FYGDEEKDKGLQTSQDAR.F           | 8            | CALR_HUMAN           |
| P27797                                                                    | 2             | 3.01             | K.FYGDEEKDK.G                    | 3            | CALR_HUMAN           |
| P27797                                                                    | 1             | 2.3207           | K.FVLSSGK.F                      | 8            | CALR_HUMAN           |
| P27797                                                                    | 3             | 3.9245           | K.DPDASKPEDWDER.A                | 1            | CALR_HUMAN           |
| P27797                                                                    | 2             | 3.444            | K.DKGLQTSQDAR.F                  | 2            | CALR_HUMAN           |
| P27797                                                                    | 2             | 4.4458           | K.IKDPDASKPEDWDER.A              | 6            | CALR_HUMAN           |
| <b><i>CALRETICULIN=CALCIUM binding protein - Homo sapiens (Human)</i></b> |               |                  |                                  |              |                      |
| Q9UDG2                                                                    | 2             | 4.0545           | -.EPAVYFKEQFLDGDGWTSR.W          | 3            | Q9UDG2_HUMA          |
| <b><i>Calumenin precursor - Homo sapiens (Human)</i></b>                  |               |                  |                                  |              |                      |
| O43852                                                                    | 2             | 2.8291           | K.TFDQLTPEESK.E                  | 1            | CALU_HUMAN           |
| O43852                                                                    | 2             | 3.0289           | R.WIYEDVER.Q                     | 8            | CALU_HUMAN           |
| O43852                                                                    | 2             | 3.9955           | K.TFDQLTPEESKER.L                | 4            | CALU_HUMAN           |
| O43852                                                                    | 3             | 3.8914           | K.VHNDAQSFYDHDHDAFLGAEAK.T       | 1            | CALU_HUMAN           |
| O43852                                                                    | 2             | 3.5408           | R.HLVYESDQNK.D                   | 2            | CALU_HUMAN           |
| O43852                                                                    | 3             | 4.7052           | R.HLVYESDQNKDGK.L                | 5            | CALU_HUMAN           |
| O43852                                                                    | 4             | 5.7109           | R.VHHEPQLSDKVHNDAQSFYDHDHDAFLGAE | 3            | CALU_HUMAN           |
| O43852                                                                    | 3             | 6.07             | K.MDKEETKWILPSDYDHAEAEAR.H       | 5            | CALU_HUMAN           |
| O43852                                                                    | 3             | 4.5612           | R.VHHEPQLSDK.V                   | 1            | CALU_HUMAN           |
| O43852                                                                    | 2             | 2.9584           | K.RWIYEDVER.Q                    | 1            | CALU_HUMAN           |
| O43852                                                                    | 4             | 5.4684           | K.MADKGDLIATKEEFTAFHPEEYDYMK.D   | 2            | CALU_HUMAN           |
| O43852                                                                    | 2             | 4.3474           | K.MADKGDLIATK.E                  | 2            | CALU_HUMAN           |

| <i>Accession No*</i>                                                               | <i>Charge</i> | <i>XC(Max)**</i> | <i>Peptide*</i>                    | <i>TC***</i> | <i>Reference No*</i> |
|------------------------------------------------------------------------------------|---------------|------------------|------------------------------------|--------------|----------------------|
| O43852                                                                             | 4             | 5.6763           | K.M#DKEETKDWILPSDYDHAEAEAR.H       | 3            | CALU_HUMAN           |
| O43852                                                                             | 2             | 3.9758           | K.M#ADKDGDLIATK.E                  | 1            | CALU_HUMAN           |
| O43852                                                                             | 3             | 6.9992           | K.LTKEEIVDKYDLFVGSQATDFGEALVR.H    | 1            | CALU_HUMAN           |
| O43852                                                                             | 2             | 3.972            | K.IDGDKDGFVTVDELKDWIK.F            | 1            | CALU_HUMAN           |
| O43852                                                                             | 2             | 3.2703           | K.TEREQFVEFR.D                     | 3            | CALU_HUMAN           |
| O43852                                                                             | 3             | 4.5462           | K.TEREQFVEFRDK.N                   | 2            | CALU_HUMAN           |
| <b><i>cAMP response element-binding protein - Homo sapiens (Human)</i></b>         |               |                  |                                    |              |                      |
| P16220                                                                             | 2             | 3.9908           | R.TAPTSTIAPGVVM#ASSPALPTQPAEEAAR.K | 2            | CREB1_HUMAN          |
| P16220                                                                             | 2             | 3.4504           | R.TAPTSTIAPGVVMASPPALPTQPAEEAAR.K  | 1            | CREB1_HUMAN          |
| <b><i>cAMP response element-binding protein 5 - Homo sapiens (Human)</i></b>       |               |                  |                                    |              |                      |
| Q02930                                                                             | 2             | 3.0855           | R.VVDEDPDER.R                      | 1            | CREB5_HUMAN          |
| <b><i>cAMP-dependent protein kinase inhibitor gamma - Homo sapiens (Human)</i></b> |               |                  |                                    |              |                      |
| Q9Y2B9                                                                             | 3             | 6.1853           | R.KLAGDMGELALEGAEGQVEGSAPDKEAGNQ   | 1            | IPKG_HUMAN           |
| <b><i>cAMP-regulated phosphoprotein 19 - Homo sapiens (Human)</i></b>              |               |                  |                                    |              |                      |
| P56211                                                                             | 2             | 2.7756           | R.KPSLVASK.L                       | 2            | ARP19_HUMAN          |
| P56211                                                                             | 2             | 3.5834           | R.YPHLGQKPGGSDFLR.K                | 3            | ARP19_HUMAN          |
| <b><i>CAP-Gly domain-containing linker protein 2 - Homo sapiens (Human)</i></b>    |               |                  |                                    |              |                      |
| Q9UDT6                                                                             | 2             | 5.2589           | R.TSTGSASSSAVAASSK.E               | 4            | CLIP2_HUMAN          |
| Q9UDT6                                                                             | 2             | 3.3923           | K.ATLNSGPGAQQK.E                   | 2            | CLIP2_HUMAN          |
| Q9UDT6                                                                             | 2             | 4.2967           | K.LQEAQEELAGLQR.H                  | 1            | CLIP2_HUMAN          |
| Q9UDT6                                                                             | 3             | 5.0779           | K.HDLETAMHVK.E                     | 2            | CLIP2_HUMAN          |
| Q9UDT6                                                                             | 3             | 4.1222           | K.MEHQLELGNLQAK.H                  | 1            | CLIP2_HUMAN          |
| Q9UDT6                                                                             | 2             | 3.7574           | K.QSSGPSSSPAAAAAPEKPGPK.A          | 2            | CLIP2_HUMAN          |
| Q9UDT6                                                                             | 3             | 4.4384           | K.SKLDLSLSDHQK.S                   | 3            | CLIP2_HUMAN          |
| Q9UDT6                                                                             | 2             | 3.2305           | K.SLEDLKATLNSGPGAQQK.E             | 1            | CLIP2_HUMAN          |
| Q9UDT6                                                                             | 2             | 4.2108           | K.TGNESGSNLSDSGSVK.R               | 3            | CLIP2_HUMAN          |
| Q9UDT6                                                                             | 2             | 3.2996           | R.DALDQAQQVEK.L                    | 1            | CLIP2_HUMAN          |
| Q9UDT6                                                                             | 3             | 4.3928           | R.KTHDASGQLVLISQELLR.K             | 1            | CLIP2_HUMAN          |
| Q9UDT6                                                                             | 4             | 5.8966           | R.RGEIEELQCLLHSGPPPDHPDAAEILR.L    | 2            | CLIP2_HUMAN          |
| Q9UDT6                                                                             | 2             | 3.2006           | R.RLEAELETVSR.K                    | 1            | CLIP2_HUMAN          |
| Q9UDT6                                                                             | 3             | 3.7617           | K.AQHEQYVAEAEK.L                   | 1            | CLIP2_HUMAN          |
| Q9UDT6                                                                             | 2             | 3.2752           | K.AYQAEVDKLR.A                     | 2            | CLIP2_HUMAN          |
| <b><i>Carbonic anhydrase 1 - Homo sapiens (Human)</i></b>                          |               |                  |                                    |              |                      |
| P00915                                                                             | 1             | 2.9513           | K.YSSLAEAASK.A                     | 2            | CAH1_HUMAN           |
| P00915                                                                             | 2             | 3.8797           | K.VLDALQAIK.T                      | 6            | CAH1_HUMAN           |

| <i>Accession No*</i>                                                                    | <i>Charge</i> | <i>XC(Max)**</i> | <i>Peptide*</i>                   | <i>TC***</i> | <i>Reference No*</i> |
|-----------------------------------------------------------------------------------------|---------------|------------------|-----------------------------------|--------------|----------------------|
| P00915                                                                                  | 2             | 6.3887           | K.TSETKHDTSLKPISVSYNPATAK.E       | 5            | CAH1_HUMAN           |
| P00915                                                                                  | 2             | 4.991            | K.LYPIANGNNQSPVDIK.T              | 2            | CAH1_HUMAN           |
| P00915                                                                                  | 3             | 5.5628           | K.HDTSLKPISVSYNPATAK.E            | 7            | CAH1_HUMAN           |
| P00915                                                                                  | 2             | 4.6203           | K.ADGLAVIGVLMK.V                  | 3            | CAH1_HUMAN           |
| P00915                                                                                  | 3             | 4.4469           | K.YSSLAEAASKADGLAVIGVLMK.V        | 2            | CAH1_HUMAN           |
| <b><i>Carbonic anhydrase 12 precursor - Homo sapiens (Human)</i></b>                    |               |                  |                                   |              |                      |
| O43570                                                                                  | 2             | 2.832            | K.WTYFGPDGENSWSK.K                | 2            | CAH12_HUMAN          |
| <b><i>Carbonic anhydrase 2 - Homo sapiens (Human)</i></b>                               |               |                  |                                   |              |                      |
| P00918                                                                                  | 3             | 4.4812           | K.AVQQPDGLAVLGIFLK.V              | 1            | CAH2_HUMAN           |
| P00918                                                                                  | 2             | 2.9139           | K.VGSAKPLQK.V                     | 1            | CAH2_HUMAN           |
| P00918                                                                                  | 3             | 4.4873           | K.YDPSLKLPSVSYDQATSLR.I           | 2            | CAH2_HUMAN           |
| <b><i>Carbonic anhydrase 9 precursor - Homo sapiens (Human)</i></b>                     |               |                  |                                   |              |                      |
| Q16790                                                                                  | 2             | 3.2752           | K.GGVSYRPAEVAETGA.-               | 1            | CAH9_HUMAN           |
| Q16790                                                                                  | 2             | 4.6495           | R.VIEASFPAGVDSSPR.A               | 1            | CAH9_HUMAN           |
| Q16790                                                                                  | 2             | 2.8425           | R.YGGDPPWPR.V                     | 2            | CAH9_HUMAN           |
| <b><i>Carbonyl reductase [NADPH] 1 - Homo sapiens (Human)</i></b>                       |               |                  |                                   |              |                      |
| P16152                                                                                  | 3             | 5.5              | K.SPEEGAETPVYLALLPPDAEGPHGQFVSEK. | 1            | CBR1_HUMAN           |
| <b><i>Carboxylesterase 2 precursor - Homo sapiens (Human)</i></b>                       |               |                  |                                   |              |                      |
| O00748                                                                                  | 2             | 3.0233           | K.MIPGVVDGVFLPR.H                 | 1            | EST2_HUMAN           |
| <b><i>Carnitine O-palmitoyltransferase I, muscle isoform - Homo sapiens (Human)</i></b> |               |                  |                                   |              |                      |
| Q92523                                                                                  | 1             | 2.1904           | R.KALLDIADLFQVPK.A                | 1            | CPT1B_HUMAN          |
| <b><i>Casein kinase I isoform epsilon - Homo sapiens (Human)</i></b>                    |               |                  |                                   |              |                      |
| P49674                                                                                  | 2             | 3.6805           | R.GAPANVSSSDLTGR.Q                | 3            | KC1E_HUMAN           |
| P49674                                                                                  | 3             | 3.9172           | R.IPASQTSVPFDHLGK.-               | 1            | KC1E_HUMAN           |
| <b><i>Caskin-2 - Homo sapiens (Human)</i></b>                                           |               |                  |                                   |              |                      |
| Q8WXE0                                                                                  | 2             | 5.0275           | K.SIGTKEQEGTPSASTK.H              | 2            | CSKI2_HUMAN          |
| Q8WXE0                                                                                  | 3             | 5.9619           | K.VPGAGTAPKPVSVACTQLAFSGPK.L      | 4            | CSKI2_HUMAN          |
| Q8WXE0                                                                                  | 2             | 3.4162           | R.LSSVSGSPPEPPPLDGSPGPK.E         | 3            | CSKI2_HUMAN          |
| Q8WXE0                                                                                  | 3             | 5.924            | R.SHSLSRPGTEGDAEGEAEQVPGSTLGSYA   | 1            | CSKI2_HUMAN          |
| Q8WXE0                                                                                  | 2             | 2.9355           | R.TSPSVTPTPAR.G                   | 1            | CSKI2_HUMAN          |
| Q8WXE0                                                                                  | 3             | 3.7515           | K.QRPKPAGPPPR.E                   | 1            | CSKI2_HUMAN          |
| <b><i>Catalase - Homo sapiens (Human)</i></b>                                           |               |                  |                                   |              |                      |
| P04040                                                                                  | 2             | 4.2109           | K.GAGAFGYFEVTHDITK.Y              | 1            | CATA_HUMAN           |
| P04040                                                                                  | 2             | 4.0625           | R.AFYVNVLNNEQR.K                  | 3            | CATA_HUMAN           |
| P04040                                                                                  | 3             | 4.6933           | R.AAQKADVLTTGAGNPVGDKLNIVTVGPR.G  | 1            | CATA_HUMAN           |

| <i>Accession No*</i>                                                                         | <i>Charge</i> | <i>XC(Max)**</i> | <i>Peptide*</i>                  | <i>TC***</i> | <i>Reference No*</i> |
|----------------------------------------------------------------------------------------------|---------------|------------------|----------------------------------|--------------|----------------------|
| P04040                                                                                       | 2             | 3.0643           | K.LNVITVGPR.G                    | 2            | CATA_HUMAN           |
| P04040                                                                                       | 2             | 5.1575           | K.ADLTTGAGNPVGDGLNVITVGPR.G      | 2            | CATA_HUMAN           |
| P04040                                                                                       | 3             | 4.4873           | K.NAIHTFVQSGSHLAAR.E             | 2            | CATA_HUMAN           |
| <b><i>Catenin alpha-1 - Homo sapiens (Human)</i></b>                                         |               |                  |                                  |              |                      |
| P35221                                                                                       | 2             | 3.8876           | K.HVNPVQALSEFK.A                 | 4            | CTNA1_HUMAN          |
| P35221                                                                                       | 3             | 4.2536           | K.KHVNPVQALSEFK.A                | 5            | CTNA1_HUMAN          |
| <b><i>Catenin beta-1 - Homo sapiens (Human)</i></b>                                          |               |                  |                                  |              |                      |
| P35222                                                                                       | 3             | 3.8993           | K.AAVSHWQQSYLDSGIHSGATTTAPSLSGK. | 1            | CTNB1_HUMAN          |
| <b><i>Cathepsin B precursor - Homo sapiens (Human)</i></b>                                   |               |                  |                                  |              |                      |
| P07858                                                                                       | 2             | 2.8314           | K.ICEPGYSPTYK.Q                  | 1            | CATB_HUMAN           |
| P07858                                                                                       | 2             | 3.8151           | K.NGPVEGAFSVYSDFLLYK.S           | 2            | CATB_HUMAN           |
| <b><i>Cathepsin D precursor - Homo sapiens (Human)</i></b>                                   |               |                  |                                  |              |                      |
| P07339                                                                                       | 2             | 3.9536           | R.DPDAQPGGELM#LGGTDSK.Y          | 2            | CATD_HUMAN           |
| P07339                                                                                       | 3             | 4.7917           | R.ISVNNVLPVFDNLMQQK.L            | 2            | CATD_HUMAN           |
| <b><i>Cathepsin G precursor - Homo sapiens (Human)</i></b>                                   |               |                  |                                  |              |                      |
| P08311                                                                                       | 2             | 2.7151           | R.ENTQQHITAR.R                   | 1            | CATG_HUMAN           |
| P08311                                                                                       | 2             | 3.5208           | R.RENTQQHITAR.R                  | 3            | CATG_HUMAN           |
| <b><i>Cathepsin L precursor - Homo sapiens (Human)</i></b>                                   |               |                  |                                  |              |                      |
| P07711                                                                                       | 2             | 3.8077           | K.NSWGEEWGM#GGYVK.M              | 3            | CATL_HUMAN           |
| <b><i>Cation-dependent mannose-6-phosphate receptor precursor - Homo sapiens (Human)</i></b> |               |                  |                                  |              |                      |
| P20645                                                                                       | 2             | 3.7547           | R.HTLADNFNPVSEER.G               | 1            | MPRD_HUMAN           |
| <b><i>Caveolin-1 - Homo sapiens (Human)</i></b>                                              |               |                  |                                  |              |                      |
| Q03135                                                                                       | 2             | 4.9137           | K.YVDSEGHLYTVPIR.E               | 5            | CAV1_HUMAN           |
| <b><i>CCDC43 protein - Homo sapiens (Human)</i></b>                                          |               |                  |                                  |              |                      |
| Q86WV7                                                                                       | 2             | 4.1934           | R.NTNVEDVLNAR.K                  | 4            | Q86WV7_HUMA          |
| <b><i>CCR4-NOT transcription complex subunit 2 - Homo sapiens (Human)</i></b>                |               |                  |                                  |              |                      |
| Q9NZN8                                                                                       | 2             | 2.8292           | R.GM#SNNTPQLNR.S                 | 2            | CNOT2_HUMAN          |
| Q9NZN8                                                                                       | 2             | 3.1481           | R.GMSNNTPQLNR.S                  | 2            | CNOT2_HUMAN          |
| Q9NZN8                                                                                       | 3             | 4.4517           | R.NMMNHSQVQGIGIPSR.T             | 2            | CNOT2_HUMAN          |
| Q9NZN8                                                                                       | 2             | 3.6151           | R.TNSM#SSSGLGSPNR.S              | 2            | CNOT2_HUMAN          |
| Q9NZN8                                                                                       | 2             | 3.6338           | R.TNSMSSSGLGSPNR.S               | 2            | CNOT2_HUMAN          |
| <b><i>CD109 antigen precursor - Homo sapiens (Human)</i></b>                                 |               |                  |                                  |              |                      |
| Q6YHK3                                                                                       | 2             | 3.3452           | K.TLTLPSLPLNSADEIYELR.V          | 1            | CD109_HUMAN          |
| <b><i>CD2 antigen cytoplasmic tail-binding protein 2 - Homo sapiens (Human)</i></b>          |               |                  |                                  |              |                      |
| O95400                                                                                       | 3             | 4.1997           | R.KVTFQGVGDEEDEDEIIVPK.K         | 1            | CD2B2_HUMAN          |

| <i>Accession No*</i>                                             | <i>Charge</i> | <i>XC(Max)**</i> | <i>Peptide*</i>                | <i>TC***</i> | <i>Reference No*</i> |
|------------------------------------------------------------------|---------------|------------------|--------------------------------|--------------|----------------------|
| O95400                                                           | 2             | 2.8632           | R.KLDPPGGQFYNSK.R              | 1            | CD2B2_HUMAN          |
| O95400                                                           | 2             | 3.1672           | K.LVDPVAGSGGPGSR.F             | 2            | CD2B2_HUMAN          |
| O95400                                                           | 2             | 3.5891           | K.VTFQGVGDEEDEDEIIVPK.K        | 2            | CD2B2_HUMAN          |
| <b><i>CD2-associated protein - Homo sapiens (Human)</i></b>      |               |                  |                                |              |                      |
| Q9Y5K6                                                           | 1             | 3.2427           | K.TQSVEITK.T                   | 4            | CD2AP_HUMAN          |
| Q9Y5K6                                                           | 2             | 3.1666           | R.SNLEMEIEK.L                  | 1            | CD2AP_HUMAN          |
| Q9Y5K6                                                           | 2             | 4.5196           | K.ANTTAFLTPLEIK.A              | 3            | CD2AP_HUMAN          |
| Q9Y5K6                                                           | 2             | 2.9619           | R.ISTYGLPAGGIQHPQTK.N          | 2            | CD2AP_HUMAN          |
| Q9Y5K6                                                           | 2             | 3.3041           | R.TLFAYEGTNEDELTFK.E           | 1            | CD2AP_HUMAN          |
| Q9Y5K6                                                           | 2             | 3.5318           | R.HGNVASLVQR.I                 | 2            | CD2AP_HUMAN          |
| Q9Y5K6                                                           | 2             | 4.2139           | R.GIGFGDIFKEGSVK.L             | 3            | CD2AP_HUMAN          |
| Q9Y5K6                                                           | 2             | 2.9748           | R.GIGFGDIFK.E                  | 4            | CD2AP_HUMAN          |
| Q9Y5K6                                                           | 2             | 3.3292           | R.ETEFKDDSLPIKR.E              | 2            | CD2AP_HUMAN          |
| Q9Y5K6                                                           | 2             | 3.9779           | K.YFSLKPEEKDEK.S               | 2            | CD2AP_HUMAN          |
| Q9Y5K6                                                           | 2             | 3.1646           | K.SVDFDSLTVR.T                 | 1            | CD2AP_HUMAN          |
| Q9Y5K6                                                           | 2             | 5.721            | K.LQEEGWLEGEINGR.R             | 2            | CD2AP_HUMAN          |
| Q9Y5K6                                                           | 2             | 3.2512           | K.LGLFSPNFVK.E                 | 2            | CD2AP_HUMAN          |
| Q9Y5K6                                                           | 2             | 4.2026           | K.KLQEEGWLEGEINGR.R            | 1            | CD2AP_HUMAN          |
| Q9Y5K6                                                           | 2             | 4.342            | K.INGEVSSISSKFETEPVSK.L        | 2            | CD2AP_HUMAN          |
| Q9Y5K6                                                           | 1             | 2.2828           | K.FETEPVSK.L                   | 1            | CD2AP_HUMAN          |
| Q9Y5K6                                                           | 1             | 2.2239           | K.DLEEEK.T                     | 2            | CD2AP_HUMAN          |
| Q9Y5K6                                                           | 2             | 3.8674           | K.APAPKPELIAAEK.K              | 2            | CD2AP_HUMAN          |
| Q9Y5K6                                                           | 2             | 3.888            | K.AKVETDDVKK.N                 | 3            | CD2AP_HUMAN          |
| Q9Y5K6                                                           | 3             | 4.1804           | K.APAPKPELIAAEKK.Y             | 4            | CD2AP_HUMAN          |
| <b><i>CD44 antigen precursor - Homo sapiens (Human)</i></b>      |               |                  |                                |              |                      |
| P16070                                                           | 3             | 7.2939           | K.SQEMVHLVNKESSETPDQFMTADETR.N | 1            | CD44_HUMAN           |
| P16070                                                           | 2             | 3.0462           | K.ESETPDQFMTADETR.N            | 1            | CD44_HUMAN           |
| P16070                                                           | 2             | 3.3969           | K.ESETPDQFM#TADETR.N           | 2            | CD44_HUMAN           |
| P16070                                                           | 1             | 2.7331           | R.NLQNVDMK.I                   | 3            | CD44_HUMAN           |
| <b><i>CD59 glycoprotein precursor - Homo sapiens (Human)</i></b> |               |                  |                                |              |                      |
| P13987                                                           | 2             | 3.6944           | K.AGLQVYNK.C                   | 11           | CD59_HUMAN           |
| <b><i>CD97 antigen precursor - Homo sapiens (Human)</i></b>      |               |                  |                                |              |                      |
| P48960                                                           | 2             | 4.0846           | K.KQAELEEIYESSIR.G             | 1            | CD97_HUMAN           |
| P48960                                                           | 2             | 4.34             | K.LVDELMEAPGDVEALAPPVR.H       | 1            | CD97_HUMAN           |
| P48960                                                           | 2             | 3.857            | K.QAELEEIYESSIR.G              | 2            | CD97_HUMAN           |

| <i>Accession No*</i>                                                                                         | <i>Charge</i> | <i>XC(Max)**</i> | <i>Peptide*</i>                  | <i>TC***</i> | <i>Reference No*</i> |
|--------------------------------------------------------------------------------------------------------------|---------------|------------------|----------------------------------|--------------|----------------------|
| P48960                                                                                                       | 2             | 4.0518           | K.TSSAEVTIQNVIK.L                | 2            | CD97_HUMAN           |
| <b><i>CD99 antigen precursor - Homo sapiens (Human)</i></b>                                                  |               |                  |                                  |              |                      |
| P14209                                                                                                       | 2             | 3.5951           | R.NANAEPAVQR.T                   | 3            | CD99_HUMAN           |
| <b><i>Cdc42 effector protein 1 - Homo sapiens (Human)</i></b>                                                |               |                  |                                  |              |                      |
| Q00587                                                                                                       | 2             | 3.5764           | K.LSPVGVVSSSQGK.R                | 2            | BORG5_HUMAN          |
| Q00587                                                                                                       | 3             | 4.6946           | K.NAISLPQLNQAAAYDSLTVVGK.L       | 2            | BORG5_HUMAN          |
| Q00587                                                                                                       | 2             | 3.2079           | R.TPVSTVQANTFEFADAEEDDEVKV.-     | 1            | BORG5_HUMAN          |
| <b><i>Cdc42 effector protein 2 - Homo sapiens (Human)</i></b>                                                |               |                  |                                  |              |                      |
| O14613                                                                                                       | 3             | 4.8326           | K.FHLLPGTM#VEGPEEDGTDFLDPFQFTR.T | 2            | BORG1_HUMAN          |
| <b><i>Cdc42 effector protein 4 - Homo sapiens (Human)</i></b>                                                |               |                  |                                  |              |                      |
| Q9H3Q1                                                                                                       | 3             | 4.0458           | R.QPDKEFSFMDEEEDEIRV.-           | 1            | BORG4_HUMAN          |
| Q9H3Q1                                                                                                       | 2             | 4.5572           | K.AGEPDGESLDEQPSSSSSK.R          | 14           | BORG4_HUMAN          |
| Q9H3Q1                                                                                                       | 2             | 3.9884           | K.AGEPDGESLDEQPSSSSSKR.S         | 2            | BORG4_HUMAN          |
| Q9H3Q1                                                                                                       | 2             | 4.7307           | K.ANDGEGGDEEAGTEEAVPR.R          | 10           | BORG4_HUMAN          |
| Q9H3Q1                                                                                                       | 2             | 4.9535           | K.KANDGEGGDEEAGTEEAVPR.R         | 2            | BORG4_HUMAN          |
| Q9H3Q1                                                                                                       | 2             | 3.0085           | R.ADLTAEM#ISAPLGDFR.H            | 1            | BORG4_HUMAN          |
| Q9H3Q1                                                                                                       | 2             | 2.7788           | R.DMLGSLRDSALFVK.N               | 1            | BORG4_HUMAN          |
| <b><i>Cdc42 GTPase-activating protein - Homo sapiens (Human)</i></b>                                         |               |                  |                                  |              |                      |
| Q2M1Z3                                                                                                       | 2             | 5.5884           | R.DPANQSTQGASTAASR.E             | 3            | Q2M1Z3_HUMA          |
| <b><i>Cdc42-interacting protein 4 - Homo sapiens (Human)</i></b>                                             |               |                  |                                  |              |                      |
| Q15642                                                                                                       | 2             | 3.254            | K.EGGEYVPTSYLR.V                 | 2            | CIP4_HUMAN           |
| Q15642                                                                                                       | 2             | 2.7302           | K.YEAWLAEAESR.V                  | 1            | CIP4_HUMAN           |
| Q15642                                                                                                       | 3             | 3.989            | R.HARPPDPASAPPDSSSNSASQDTK.E     | 1            | CIP4_HUMAN           |
| Q15642                                                                                                       | 2             | 2.9498           | R.LQQQLEER.S                     | 1            | CIP4_HUMAN           |
| <b><i>CDNA FLJ10233 fis, clone HEMBB1000266 - Homo sapiens (Human)</i></b>                                   |               |                  |                                  |              |                      |
| Q9NW82                                                                                                       | 3             | 4.6437           | R.SGPSEVTGSDASGPDPQLAVTMGFTGFGK. | 1            | Q9NW82_HUMA          |
| Q9NW82                                                                                                       | 2             | 4.2434           | K.NIALDKTDDSNPR.E                | 2            | Q9NW82_HUMA          |
| Q9NW82                                                                                                       | 3             | 4.1124           | K.TM#FAQVESDDEEAKNEPEWK.K        | 1            | Q9NW82_HUMA          |
| Q9NW82                                                                                                       | 3             | 5.0223           | R.SGPSEVTGSDASGPDPQLAVTM#GFTGFGK | 2            | Q9NW82_HUMA          |
| <b><i>CDNA FLJ13298 fis, clone OVARC1001306, weakly similar to N-MYC PROTO-ONCOGENE PRO</i></b>              |               |                  |                                  |              |                      |
| Q9H8R3                                                                                                       | 2             | 3.0681           | K.KEADEQLIKETK.T                 | 2            | Q9H8R3_HUMA          |
| <b><i>CDNA FLJ16182 fis, clone BRTHA2002133 - Homo sapiens (Human)</i></b>                                   |               |                  |                                  |              |                      |
| Q6ZNE3                                                                                                       | 2             | 2.7787           | R.QEKEIKDIQIGK.S                 | 1            | Q6ZNE3_HUMA          |
| <b><i>CDNA FLJ16607 fis, clone TESTI4010382, highly similar to Rattus norvegicus dynein, cytoplasmic</i></b> |               |                  |                                  |              |                      |
| Q6ZMX7                                                                                                       | 2             | 2.7879           | K.TCLEEWTKSAGLEK.F               | 1            | Q6ZMX7_HUMA          |



| <i>Accession No*</i>                                                                                     | <i>Charge</i> | <i>XC(Max)**</i> | <i>Peptide*</i>                  | <i>TC***</i> | <i>Reference No*</i> |
|----------------------------------------------------------------------------------------------------------|---------------|------------------|----------------------------------|--------------|----------------------|
| <b><i>CDNA FLJ20036 fis, clone COL00219 - Homo sapiens (Human)</i></b>                                   |               |                  |                                  |              |                      |
| Q9NXV6                                                                                                   | 2             | 2.7088           | K.SSSQTSGLVSK.S                  | 1            | Q9NXV6_HUMA          |
| Q9NXV6                                                                                                   | 2             | 3.1984           | K.SSSQTSTSQLPSK.S                | 2            | Q9NXV6_HUMA          |
| Q9NXV6                                                                                                   | 2             | 4.457            | K.STSLASVSQLASK.S                | 1            | Q9NXV6_HUMA          |
| Q9NXV6                                                                                                   | 2             | 4.304            | K.TSSEASVSSVAK.N                 | 1            | Q9NXV6_HUMA          |
| Q9NXV6                                                                                                   | 2             | 4.6974           | R.SSGISSQNSSTSDGDR.S             | 4            | Q9NXV6_HUMA          |
| <b><i>CDNA FLJ31051 fis, clone HSYRA2000605, weakly similar to MYOSIN HEAVY CHAIN, CLONE</i></b>         |               |                  |                                  |              |                      |
| Q96ND2                                                                                                   | 2             | 3.007            | R.VSQDLIETEK.K                   | 2            | Q96ND2_HUMA          |
| Q96ND2                                                                                                   | 2             | 4.7896           | K.TLEGIQYDNSILK.M                | 2            | Q96ND2_HUMA          |
| <b><i>CDNA FLJ31713 fis, clone NT2RI2006487 - Homo sapiens (Human)</i></b>                               |               |                  |                                  |              |                      |
| Q96MY4                                                                                                   | 2             | 2.718            | R.IQSTSPASVLSSTK.E               | 1            | Q96MY4_HUMA          |
| <b><i>CDNA FLJ32810 fis, clone TESTI2002729, weakly similar to Homo sapiens oligophrenin 1 - Hom</i></b> |               |                  |                                  |              |                      |
| Q96M56                                                                                                   | 2             | 4.3513           | K.SYSGSIQSLTSVGSK.E              | 4            | Q96M56_HUMA          |
| <b><i>CDNA FLJ35765 fis, clone TESTI2004941 - Homo sapiens (Human)</i></b>                               |               |                  |                                  |              |                      |
| Q8NA79                                                                                                   | 2             | 2.8535           | R.FWAC*LGSSAAKTLTSLSNAELCFPR.Q   | 1            | Q8NA79_HUMA          |
| <b><i>CDNA FLJ36810 fis, clone ASTRO2001249 - Homo sapiens (Human)</i></b>                               |               |                  |                                  |              |                      |
| Q8N9N8                                                                                                   | 2             | 2.99             | K.EVLGEHIVPSDQQQIVR.V            | 1            | Q8N9N8_HUMA          |
| Q8N9N8                                                                                                   | 3             | 5.2074           | K.RGDFLIVDPIEEGEKVK.A            | 1            | Q8N9N8_HUMA          |
| Q8N9N8                                                                                                   | 1             | 2.5537           | R.FLVSMPSKYRK.N                  | 2            | Q8N9N8_HUMA          |
| Q8N9N8                                                                                                   | 3             | 5.1716           | R.TPGNNLHEVETAQQQR.F             | 4            | Q8N9N8_HUMA          |
| <b><i>CDNA FLJ37649 fis, clone BRHIP2000534, moderately similar to GAMMA-INTERFERON-INDU</i></b>         |               |                  |                                  |              |                      |
| Q8N9E5                                                                                                   | 2             | 2.9349           | K.TLSAPPNTSSTENPK.T              | 1            | Q8N9E5_HUMA          |
| <b><i>CDNA FLJ40925 fis, clone UTERU2006486 - Homo sapiens (Human)</i></b>                               |               |                  |                                  |              |                      |
| Q8N7K9                                                                                                   | 2             | 3.1736           | K.TQTAETQPSSR.I                  | 2            | Q8N7K9_HUMA          |
| <b><i>CDNA FLJ41046 fis, clone NT2RP7009030 - Homo sapiens (Human)</i></b>                               |               |                  |                                  |              |                      |
| Q6ZWI0                                                                                                   | 2             | 2.741            | K.WVDSGCKGIFSHFSQQR.K            | 1            | Q6ZWI0_HUMA          |
| <b><i>CDNA FLJ41346 fis, clone BRAWH2005315, moderately similar to Neuronal-STOP protein - Hom</i></b>   |               |                  |                                  |              |                      |
| Q6ZWB8                                                                                                   | 3             | 4.5678           | K.TQGPVATEPDKDQGSVVPGLLK.G       | 1            | Q6ZWB8_HUMA          |
| <b><i>CDNA FLJ41802 fis, clone NHNPC2002565 - Homo sapiens (Human)</i></b>                               |               |                  |                                  |              |                      |
| Q6ZW13                                                                                                   | 3             | 3.8634           | K.AEAELPPKPLQEEEEPEDSQSEPSAK.Q   | 1            | Q6ZW13_HUMA          |
| <b><i>CDNA FLJ41861 fis, clone NTONG2008672 - Homo sapiens (Human)</i></b>                               |               |                  |                                  |              |                      |
| Q6ZVZ7                                                                                                   | 3             | 4.2067           | R.SPVQEDRPGPGLGLSTPVPVTEQGTQIR.T | 1            | Q6ZVZ7_HUMA          |
| <b><i>CDNA FLJ42542 fis, clone BRACE3004435 - Homo sapiens (Human)</i></b>                               |               |                  |                                  |              |                      |
| Q6ZVI5                                                                                                   | 2             | 3.3377           | R.SPGSLSPWLLGRR.G                | 2            | Q6ZVI5_HUMAN         |

| <i>Accession No*</i>                                                                                        | <i>Charge</i> | <i>XC(Max)**</i> | <i>Peptide*</i>                 | <i>TC***</i> | <i>Reference No*</i> |
|-------------------------------------------------------------------------------------------------------------|---------------|------------------|---------------------------------|--------------|----------------------|
| <b><i>CDNA FLJ44590 fis, clone BLADE2000256, moderately similar to Homo sapiens suppression of tu</i></b>   |               |                  |                                 |              |                      |
| Q6ZTJ7                                                                                                      | 2             | 4.125            | R.NTGTGLGSLEEPAGGASVSAGSR.A     | 1            | Q6ZTJ7_HUMAN         |
| <b><i>CDNA FLJ45252 fis, clone BRHIP2011199 - Homo sapiens (Human)</i></b>                                  |               |                  |                                 |              |                      |
| Q6ZSR9                                                                                                      | 2             | 3.1368           | K.QSIAGSVSITSLSSR.T             | 1            | Q6ZSR9_HUMA          |
| Q6ZSR9                                                                                                      | 2             | 4.9756           | R.HYSPEDEPSPEAQPIAAYK.I         | 3            | Q6ZSR9_HUMA          |
| <b><i>CDNA FLJ45505 fis, clone BRTHA2020642, weakly similar to DRR1 protein - Homo sapiens (Hu</i></b>      |               |                  |                                 |              |                      |
| Q6ZSI4                                                                                                      | 2             | 3.9902           | K.KQLQEEQENAPEFVK.V             | 3            | Q6ZSI4_HUMAN         |
| Q6ZSI4                                                                                                      | 2             | 2.8672           | R.RTGQEVAQAQES.-                | 1            | Q6ZSI4_HUMAN         |
| Q6ZSI4                                                                                                      | 3             | 6.6501           | K.LEQLELEKQKLQEEQENAPEFVK.V     | 2            | Q6ZSI4_HUMAN         |
| Q6ZSI4                                                                                                      | 1             | 3.205            | R.TGQEVAQAQES.-                 | 5            | Q6ZSI4_HUMAN         |
| <b><i>CDNA FLJ46103 fis, clone TESTI2023903, weakly similar to Homo sapiens ubiquilin 1 - Homo sa</i></b>   |               |                  |                                 |              |                      |
| Q6ZRUI                                                                                                      | 2             | 3.4814           | R.VIYNSSGGFSSNTSANDTLNKNVHTSK.A | 1            | Q6ZRUI_HUMA          |
| <b><i>CDNA FLJ46765 fis, clone TRACH3024512 - Homo sapiens (Human)</i></b>                                  |               |                  |                                 |              |                      |
| Q6ZQZ9                                                                                                      | 2             | 2.867            | K.LEISRCMGPNTCHQK.S             | 2            | Q6ZQZ9_HUMA          |
| <b><i>CDNA FLJ46846 fis, clone UTERU3004635, moderately similar to Neuroblast differentiation assoc</i></b> |               |                  |                                 |              |                      |
| Q6ZQN2                                                                                                      | 2             | 3.9082           | K.VEGDLKGPEVDIR.D               | 2            | Q6ZQN2_HUMA          |
| Q6ZQN2                                                                                                      | 2             | 3.9058           | K.M#KGDVDVSLPK.V                | 3            | Q6ZQN2_HUMA          |
| Q6ZQN2                                                                                                      | 2             | 4.1111           | K.MEGDLKAPEVDIK.G               | 2            | Q6ZQN2_HUMA          |
| Q6ZQN2                                                                                                      | 2             | 4.6085           | K.MEGDLKAPEVDIKGPK.V            | 4            | Q6ZQN2_HUMA          |
| Q6ZQN2                                                                                                      | 2             | 3.9279           | K.MKGDVDVSLPK.V                 | 3            | Q6ZQN2_HUMA          |
| Q6ZQN2                                                                                                      | 2             | 4.5956           | K.SPQISM#SDIDLNLK.G             | 1            | Q6ZQN2_HUMA          |
| Q6ZQN2                                                                                                      | 2             | 4.4652           | K.SPQISMSDIDLNLK.G              | 1            | Q6ZQN2_HUMA          |
| Q6ZQN2                                                                                                      | 2             | 2.9502           | K.VDIDAPDVSIEGPDAL.L            | 1            | Q6ZQN2_HUMA          |
| Q6ZQN2                                                                                                      | 2             | 3.7353           | K.VDIDVPDVNIEGPDAL.L            | 5            | Q6ZQN2_HUMA          |
| Q6ZQN2                                                                                                      | 3             | 5.2789           | K.VESDLKGPEVDIEGPEGK.L          | 14           | Q6ZQN2_HUMA          |
| Q6ZQN2                                                                                                      | 2             | 4.8845           | K.VGIDTPDIDIHGPEGK.L            | 8            | Q6ZQN2_HUMA          |
| Q6ZQN2                                                                                                      | 2             | 2.9173           | K.VKGDM#DISLPK.V                | 2            | Q6ZQN2_HUMA          |
| Q6ZQN2                                                                                                      | 2             | 4.1215           | K.VKGDMDISLPK.V                 | 7            | Q6ZQN2_HUMA          |
| Q6ZQN2                                                                                                      | 3             | 4.1178           | K.M#EGDLKAPEVDIKGPK.V           | 1            | Q6ZQN2_HUMA          |
| Q6ZQN2                                                                                                      | 3             | 3.8424           | K.SPQISM#SDIDLNLKPK.I           | 4            | Q6ZQN2_HUMA          |
| Q6ZQN2                                                                                                      | 2             | 4.5075           | K.VDIDTPDIDIHGPEGK.L            | 4            | Q6ZQN2_HUMA          |
| Q6ZQN2                                                                                                      | 2             | 3.6004           | K.FSMPGFKGEGPEVDVNLPK.A         | 1            | Q6ZQN2_HUMA          |
| Q6ZQN2                                                                                                      | 1             | 3.3349           | K.ADIEISGPK.V                   | 5            | Q6ZQN2_HUMA          |
| Q6ZQN2                                                                                                      | 3             | 4.1653           | K.ADLDVSGPKVDIDVPDVNIEGPDAL.L   | 4            | Q6ZQN2_HUMA          |
| Q6ZQN2                                                                                                      | 2             | 2.8718           | K.APEVDIKGPK.V                  | 2            | Q6ZQN2_HUMA          |

| <i>Accession No*</i>                                                                                       | <i>Charge</i> | <i>XC(Max)**</i> | <i>Peptide*</i>                 | <i>TC***</i> | <i>Reference No*</i> |
|------------------------------------------------------------------------------------------------------------|---------------|------------------|---------------------------------|--------------|----------------------|
| Q6ZQN2                                                                                                     | 3             | 3.7552           | K.FKMPEINIK.A                   | 2            | Q6ZQN2_HUMA          |
| Q6ZQN2                                                                                                     | 2             | 4.2188           | K.FSM#PGFKGEGPDVDVTLPK.A        | 6            | Q6ZQN2_HUMA          |
| Q6ZQN2                                                                                                     | 2             | 3.6342           | K.ISMPDIDFNKLGPK.V              | 2            | Q6ZQN2_HUMA          |
| Q6ZQN2                                                                                                     | 2             | 3.36             | K.FSMPGFKGEGPDVDVTLPK.A         | 1            | Q6ZQN2_HUMA          |
| Q6ZQN2                                                                                                     | 2             | 5.2857           | K.SPQISMSDIDLNLKLGPK.I          | 6            | Q6ZQN2_HUMA          |
| Q6ZQN2                                                                                                     | 2             | 3.0345           | K.GEGPDVDVTLPK.A                | 1            | Q6ZQN2_HUMA          |
| Q6ZQN2                                                                                                     | 3             | 6.3438           | K.ADIDVSGPKVDIDTPDIDIHGPEGK.L   | 2            | Q6ZQN2_HUMA          |
| Q6ZQN2                                                                                                     | 3             | 4.7311           | K.GPQVSGELKGGVGVNVLKGPRI        | 1            | Q6ZQN2_HUMA          |
| Q6ZQN2                                                                                                     | 2             | 5.4945           | K.GPSLDIDTPDVNIEGPEGK.L         | 7            | Q6ZQN2_HUMA          |
| Q6ZQN2                                                                                                     | 2             | 3.5345           | K.IKGDMDISVPK.L                 | 3            | Q6ZQN2_HUMA          |
| Q6ZQN2                                                                                                     | 2             | 3.4155           | K.ISM#PDIDFNKLGPK.V             | 1            | Q6ZQN2_HUMA          |
| Q6ZQN2                                                                                                     | 2             | 2.8946           | K.ISMPDIDFNKLG                  | 1            | Q6ZQN2_HUMA          |
| Q6ZQN2                                                                                                     | 2             | 3.7655           | K.FSM#PGFKGEGPEVDVNLPK.A        | 1            | Q6ZQN2_HUMA          |
| <b><i>CDNA FLJ46889 fis, clone UTERU3017995, highly similar to Homo sapiens likely ortholog of rat</i></b> |               |                  |                                 |              |                      |
| Q6ZQU3                                                                                                     | 2             | 2.8143           | K.ASSSILINESEPTTNIQIR.L         | 1            | Q6ZQU3_HUMA          |
| <b><i>CDNA PSEC0066 fis, clone NT2RP2001087, weakly similar to TETRACYCLINE RESISTANCE P</i></b>           |               |                  |                                 |              |                      |
| Q8NBP5                                                                                                     | 2             | 2.751            | K.TGTEAEAADSGAVGARR.F           | 1            | Q8NBP5_HUMA          |
| <b><i>CDNA: FLJ22312 fis, clone HRC05210. - Homo sapiens (Human)</i></b>                                   |               |                  |                                 |              |                      |
| Q9H6G0                                                                                                     | 2             | 4.0736           | K.EGESGECVAESED.R.A             | 2            | Q9H6G0_HUMA          |
| Q9H6G0                                                                                                     | 3             | 4.9328           | R.TVLEGSTASTSPADHSALPNQSLTVR.E  | 4            | Q9H6G0_HUMA          |
| Q9H6G0                                                                                                     | 3             | 4.6627           | K.TSDSKEGGEGFTVDTPAK.A          | 2            | Q9H6G0_HUMA          |
| Q9H6G0                                                                                                     | 2             | 3.0648           | K.AGPATTTSSETR.Q                | 2            | Q9H6G0_HUMA          |
| Q9H6G0                                                                                                     | 2             | 3.6206           | K.LTGIVIVENENITK.E              | 2            | Q9H6G0_HUMA          |
| <b><i>CDNA: FLJ22427 fis, clone HRC09013 - Homo sapiens (Human)</i></b>                                    |               |                  |                                 |              |                      |
| Q9H6A9                                                                                                     | 3             | 3.9145           | R.SFDTVIGAGTPPGAELLLVVRPK.D     | 1            | Q9H6A9_HUMA          |
| <b><i>CDNA: FLJ22461 fis, clone HRC10107 - Homo sapiens (Human)</i></b>                                    |               |                  |                                 |              |                      |
| Q9H698                                                                                                     | 2             | 2.7317           | K.M#AEPSSFVCRSTGSLK.T           | 1            | Q9H698_HUMAN         |
| Q9H698                                                                                                     | 2             | 4.3963           | R.DVSNLESSGGTENK.A              | 2            | Q9H698_HUMAN         |
| <b><i>Cell adhesion molecule 1 precursor - Homo sapiens (Human)</i></b>                                    |               |                  |                                 |              |                      |
| Q9BY67                                                                                                     | 2             | 3.0702           | K.SDDSVIQLLNPNR.Q               | 1            | CADM1_HUMAN          |
| <b><i>Cell cycle associated protein 1 - Homo sapiens (Human)</i></b>                                       |               |                  |                                 |              |                      |
| Q9BV09                                                                                                     | 2             | 2.8872           | R.DGYQQNFK.R                    | 3            | Q9BV09_HUMA          |
| Q9BV09                                                                                                     | 3             | 5.3957           | K.SSGPPPSGSSGSEAAAGAGAAAPASQHPA | 3            | Q9BV09_HUMA          |
| Q9BV09                                                                                                     | 3             | 5.5735           | K.SSGPPPSGSSGSEAAAGAGAAAPASQHPA | 3            | Q9BV09_HUMA          |
| <b><i>Cell division cycle 2-related protein kinase 7 - Homo sapiens (Human)</i></b>                        |               |                  |                                 |              |                      |

| <i>Accession No*</i>                                                                       | <i>Charge</i> | <i>XC(Max)**</i> | <i>Peptide*</i>                    | <i>TC***</i> | <i>Reference No*</i> |
|--------------------------------------------------------------------------------------------|---------------|------------------|------------------------------------|--------------|----------------------|
| Q9NYV4                                                                                     | 2             | 5.4444           | K.DGSGGASGTLQPSSGGGSSNSR.E         | 10           | CD2L7_HUMAN          |
| Q9NYV4                                                                                     | 2             | 3.3223           | K.RSNEETDDYGK.A                    | 2            | CD2L7_HUMAN          |
| <b><i>Cell division cycle 5-like protein - Homo sapiens (Human)</i></b>                    |               |                  |                                    |              |                      |
| Q99459                                                                                     | 3             | 4.4006           | R.SKLVLPAPQISDAELQEVVK.V           | 1            | CDC5L_HUMAN          |
| Q99459                                                                                     | 2             | 4.1327           | K.ESDLPSAILQTSQGVSEFTK.K           | 2            | CDC5L_HUMAN          |
| Q99459                                                                                     | 3             | 4.8626           | K.GGLNTPHESDFSGVTPQR.Q             | 3            | CDC5L_HUMAN          |
| Q99459                                                                                     | 2             | 3.3984           | K.VGQASEIAR.Q                      | 3            | CDC5L_HUMAN          |
| Q99459                                                                                     | 3             | 4.1334           | R.DKLNINPEDGMADYSDPSYVK.Q          | 1            | CDC5L_HUMAN          |
| Q99459                                                                                     | 2             | 3.9588           | R.DNEEETDDPR.K                     | 3            | CDC5L_HUMAN          |
| Q99459                                                                                     | 2             | 2.7785           | R.DNEEETDDPRK.L                    | 1            | CDC5L_HUMAN          |
| Q99459                                                                                     | 2             | 3.7514           | R.LGLLGLPAPK.N                     | 1            | CDC5L_HUMAN          |
| Q99459                                                                                     | 2             | 4.4385           | R.QVVQTPNTVLSTPFR.T                | 1            | CDC5L_HUMAN          |
| <b><i>Cell division cycle and apoptosis regulator protein 1 - Homo sapiens (Human)</i></b> |               |                  |                                    |              |                      |
| Q8IX12                                                                                     | 2             | 3.1315           | R.IQTLPNQNSQTQPLLK.T               | 1            | CCAR1_HUMAN          |
| Q8IX12                                                                                     | 2             | 3.1798           | K.DLSQLQENLK.I                     | 1            | CCAR1_HUMAN          |
| <b><i>Cell division cycle protein 27 homolog - Homo sapiens (Human)</i></b>                |               |                  |                                    |              |                      |
| P30260                                                                                     | 2             | 3.3378           | K.SVFSQSGNSR.E                     | 3            | CDC27_HUMAN          |
| <b><i>Cell division cycle-associated protein 4 - Homo sapiens (Human)</i></b>              |               |                  |                                    |              |                      |
| Q9BXL8                                                                                     | 2             | 2.7131           | K.C*VGHEEDVEGALAGLK.T              | 1            | CDCA4_HUMAN          |
| <b><i>Cell division protein kinase 6 - Homo sapiens (Human)</i></b>                        |               |                  |                                    |              |                      |
| Q00534                                                                                     | 1             | 2.1127           | -.MEKDGLCR.A                       | 1            | CDK6_HUMAN           |
| <b><i>Cell growth-regulating nucleolar protein - Homo sapiens (Human)</i></b>              |               |                  |                                    |              |                      |
| Q9NX58                                                                                     | 2             | 3.4368           | K.DAVEQQGEVVK.N                    | 2            | LYAR_HUMAN           |
| Q9NX58                                                                                     | 3             | 3.8695           | K.LPEHPEGGEPEDDEAPAK.G             | 1            | LYAR_HUMAN           |
| Q9NX58                                                                                     | 3             | 4.5923           | K.VKDAVEQQGEVVK.N                  | 2            | LYAR_HUMAN           |
| <b><i>Cell surface glycoprotein MUC18 precursor - Homo sapiens (Human)</i></b>             |               |                  |                                    |              |                      |
| P43121                                                                                     | 2             | 3.3364           | R.EVTVPVFYPTEK.V                   | 1            | MUC18_HUMAN          |
| P43121                                                                                     | 4             | 4.8582           | R.VYKAPEEPNIQVNPLGIPVNSKEPEEVATCVG | 1            | MUC18_HUMAN          |
| P43121                                                                                     | 2             | 5.1075           | R.VRQQGQSEPGEYEQR.L                | 4            | MUC18_HUMAN          |
| P43121                                                                                     | 2             | 3.3571           | R.TQLVNVAIFGPPWM#AFK.E             | 1            | MUC18_HUMAN          |
| P43121                                                                                     | 2             | 3.8509           | R.QGQGQSEPGEYEQR.L                 | 4            | MUC18_HUMAN          |
| P43121                                                                                     | 2             | 4.6344           | R.GATLALTQVTPQDER.I                | 4            | MUC18_HUMAN          |
| P43121                                                                                     | 2             | 2.9861           | R.EAEEETTNDNGVLVLEPARK.E           | 1            | MUC18_HUMAN          |
| P43121                                                                                     | 2             | 3.2736           | K.VWLEVEPVGMLK.E                   | 4            | MUC18_HUMAN          |
| P43121                                                                                     | 2             | 4.1857           | K.VWLEVEPVGM#LK.E                  | 4            | MUC18_HUMAN          |

| <i>Accession No*</i>                                                      | <i>Charge</i> | <i>XC(Max)**</i> | <i>Peptide*</i>                 | <i>TC***</i> | <i>Reference No*</i> |
|---------------------------------------------------------------------------|---------------|------------------|---------------------------------|--------------|----------------------|
| P43121                                                                    | 2             | 3.7045           | R.GPVLQLHDLKR.E                 | 2            | MUC18_HUMAN          |
| <b><i>Centaurin-delta 3 - Homo sapiens (Human)</i></b>                    |               |                  |                                 |              |                      |
| Q8WWN8                                                                    | 3             | 4.9337           | R.TVFGGLSGPATTQRPLSPALGGPGVSR.S | 2            | CEND3_HUMAN          |
| <b><i>Centaurin-gamma 1 - Homo sapiens (Human)</i></b>                    |               |                  |                                 |              |                      |
| Q99490                                                                    | 2             | 3.8156           | R.AISAFGPSASINGLVK.D            | 1            | CENG1_HUMAN          |
| <b><i>Centrin-2 - Homo sapiens (Human)</i></b>                            |               |                  |                                 |              |                      |
| P41208                                                                    | 2             | 4.204            | K.MNFGDFLTVM#TQK.M              | 3            | CETN2_HUMAN          |
| P41208                                                                    | 3             | 4.2831           | K.AFKLFDDDETGKISFK.N            | 1            | CETN2_HUMAN          |
| P41208                                                                    | 2             | 3.0754           | R.EAFDLFDADGTGTIDVK.E           | 1            | CETN2_HUMAN          |
| P41208                                                                    | 3             | 4.699            | R.M#SPKPELTEEKQKQKQK.E          | 1            | CETN2_HUMAN          |
| P41208                                                                    | 2             | 4.391            | K.MNFGDFLTVMTQK.M               | 6            | CETN2_HUMAN          |
| P41208                                                                    | 2             | 4.4391           | K.M#NFGDFLTVMTQK.M              | 1            | CETN2_HUMAN          |
| P41208                                                                    | 2             | 3.8807           | K.M#ISEIDKEGTGK.M               | 3            | CETN2_HUMAN          |
| P41208                                                                    | 2             | 3.462            | K.M#NFGDFLTVM#TQK.M             | 1            | CETN2_HUMAN          |
| P41208                                                                    | 2             | 3.9979           | K.MISEIDKEGTGK.M                | 4            | CETN2_HUMAN          |
| <b><i>Centrin-3 - Homo sapiens (Human)</i></b>                            |               |                  |                                 |              |                      |
| O15182                                                                    | 2             | 2.7825           | K.DYDREATGK.I                   | 2            | CETN3_HUMAN          |
| <b><i>Centromere protein C 1 - Homo sapiens (Human)</i></b>               |               |                  |                                 |              |                      |
| Q03188                                                                    | 2             | 3.5916           | R.SVQAHEVHQQ.I                  | 1            | CENPC_HUMAN          |
| Q03188                                                                    | 2             | 3.5487           | R.TISPAESTALFQGR.K              | 1            | CENPC_HUMAN          |
| <b><i>Centromere protein J - Homo sapiens (Human)</i></b>                 |               |                  |                                 |              |                      |
| Q9HC77                                                                    | 2             | 2.8712           | K.QLKEAEGPLPIKAK.P              | 2            | CENPJ_HUMAN          |
| <b><i>Centromere protein U - Homo sapiens (Human)</i></b>                 |               |                  |                                 |              |                      |
| Q71F23                                                                    | 2             | 2.8956           | K.MLKESQM#LTNLK.R               | 1            | CENPU_HUMAN          |
| <b><i>Centrosomal protein of 170 kDa - Homo sapiens (Human)</i></b>       |               |                  |                                 |              |                      |
| Q5SW79                                                                    | 3             | 4.1338           | R.FGYDTNLFTVVQGEMRVPEEALK.H     | 1            | CE170_HUMAN          |
| Q5SW79                                                                    | 2             | 2.7058           | K.HQDQAVTSSAHR.G                | 1            | CE170_HUMAN          |
| <b><i>Centrosome-associated protein 350 - Homo sapiens (Human)</i></b>    |               |                  |                                 |              |                      |
| Q5VT06                                                                    | 2             | 4.1851           | R.LTDSSPSSTSTNSQR.L             | 2            | CEP35_HUMAN          |
| <b><i>Centrosome-associated protein CEP250 - Homo sapiens (Human)</i></b> |               |                  |                                 |              |                      |
| Q9BV73                                                                    | 2             | 2.9526           | K.ATASSPTQQDGR.G                | 1            | CP250_HUMAN          |
| <b><i>Ceruloplasmin precursor - Homo sapiens (Human)</i></b>              |               |                  |                                 |              |                      |
| P00450                                                                    | 3             | 4.4193           | K.HYYIGIIEITWDYASDHGEK.K        | 1            | CERU_HUMAN           |
| P00450                                                                    | 3             | 3.9505           | K.MYYSADVPTKDIFTGLIGPMK.I       | 2            | CERU_HUMAN           |
| <b><i>CGG triplet repeat-binding protein 1 - Homo sapiens (Human)</i></b> |               |                  |                                 |              |                      |

| <i>Accession No*</i>                                                                 | <i>Charge</i> | <i>XC(Max)**</i> | <i>Peptide*</i>               | <i>TC***</i> | <i>Reference No*</i> |
|--------------------------------------------------------------------------------------|---------------|------------------|-------------------------------|--------------|----------------------|
| Q9UFW8                                                                               | 2             | 3.7587           | R.KAEFEEQNVR.K                | 3            | CGBP1_HUMAN          |
| Q9UFW8                                                                               | 2             | 3.1374           | K.VSVIQDFVK.M                 | 2            | CGBP1_HUMAN          |
| <b><i>CGI-151 protein - Homo sapiens (Human)</i></b>                                 |               |                  |                               |              |                      |
| Q9Y3E9                                                                               | 2             | 4.769            | R.YAALSDQGLDIK.A              | 5            | Q9Y3E9_HUMA          |
| <b><i>cGMP-gated cation channel alpha 1 - Homo sapiens (Human)</i></b>               |               |                  |                               |              |                      |
| P29973                                                                               | 2             | 2.7449           | R.AEFQARIDAIK.Q               | 1            | CNGA1_HUMAN          |
| <b><i>cGMP-inhibited 3',5'-cyclic phosphodiesterase A - Homo sapiens (Human)</i></b> |               |                  |                               |              |                      |
| Q14432                                                                               | 2             | 3.9324           | K.ISAVQFPESADTTAK.Q           | 2            | PDE3A_HUMAN          |
| Q14432                                                                               | 3             | 4.3325           | R.RVSSTWTTTTSATGLPTLEPAPVRR.D | 2            | PDE3A_HUMAN          |
| <b><i>Charged multivesicular body protein 1a - Homo sapiens (Human)</i></b>          |               |                  |                               |              |                      |
| Q9HD42                                                                               | 1             | 2.4134           | K.NMAQVTK.A                   | 1            | CHM1A_HUMAN          |
| Q9HD42                                                                               | 1             | 2.3951           | K.VQTAVTMK.G                  | 2            | CHM1A_HUMAN          |
| Q9HD42                                                                               | 1             | 2.2017           | R.VDAVASK.V                   | 2            | CHM1A_HUMAN          |
| <b><i>Charged multivesicular body protein 1b - Homo sapiens (Human)</i></b>          |               |                  |                               |              |                      |
| Q7LBR1                                                                               | 1             | 2.2475           | K.GNMEVAR.I                   | 1            | CHM1B_HUMAN          |
| Q7LBR1                                                                               | 2             | 2.7965           | R.VDAVAAR.V                   | 1            | CHM1B_HUMAN          |
| Q7LBR1                                                                               | 1             | 2.2045           | K.SMDATLK.T                   | 2            | CHM1B_HUMAN          |
| Q7LBR1                                                                               | 2             | 2.8005           | K.HLFNLK.F                    | 1            | CHM1B_HUMAN          |
| Q7LBR1                                                                               | 2             | 2.7566           | K.NQAVNFLR.M                  | 1            | CHM1B_HUMAN          |
| <b><i>Charged multivesicular body protein 2a - Homo sapiens (Human)</i></b>          |               |                  |                               |              |                      |
| O43633                                                                               | 2             | 2.8938           | K.KIADIKK.M                   | 1            | CHM2A_HUMAN          |
| O43633                                                                               | 2             | 3.0073           | R.ANIQAVSLK.I                 | 2            | CHM2A_HUMAN          |
| O43633                                                                               | 2             | 2.9981           | R.RKTPEELLR.Q                 | 1            | CHM2A_HUMAN          |
| O43633                                                                               | 2             | 3.183            | K.SNNSMAQAMK.G                | 3            | CHM2A_HUMAN          |
| O43633                                                                               | 2             | 7.1297           | K.KAEAAAASALADADADLEER.L      | 5            | CHM2A_HUMAN          |
| O43633                                                                               | 2             | 2.7033           | K.IMM#EFER.Q                  | 1            | CHM2A_HUMAN          |
| O43633                                                                               | 2             | 5.7308           | K.AEAAAASALADADADLEER.L       | 5            | CHM2A_HUMAN          |
| O43633                                                                               | 3             | 6.94             | K.AEAAAASALADADADLEERLK.N     | 5            | CHM2A_HUMAN          |
| O43633                                                                               | 3             | 6.2901           | K.KAEAAAASALADADADLEERLK.N    | 6            | CHM2A_HUMAN          |
| <b><i>Charged multivesicular body protein 2b - Homo sapiens (Human)</i></b>          |               |                  |                               |              |                      |
| Q9UQN3                                                                               | 2             | 3.2043           | K.TLQTM#QNFQK.E               | 2            | CHM2B_HUMAN          |
| Q9UQN3                                                                               | 2             | 3.4641           | K.ATISDEEIER.Q                | 3            | CHM2B_HUMAN          |
| Q9UQN3                                                                               | 2             | 3.957            | K.TLQTMQNFQK.E                | 8            | CHM2B_HUMAN          |
| Q9UQN3                                                                               | 2             | 3.0627           | K.M#AGAMSTTAK.T               | 1            | CHM2B_HUMAN          |
| Q9UQN3                                                                               | 2             | 3.956            | K.TVDDVIKEQNR.E               | 2            | CHM2B_HUMAN          |

| <i>Accession No*</i>                                                                | <i>Charge</i> | <i>XC(Max)**</i> | <i>Peptide*</i>                    | <i>TC***</i> | <i>Reference No*</i> |
|-------------------------------------------------------------------------------------|---------------|------------------|------------------------------------|--------------|----------------------|
| <b><i>Charged multivesicular body protein 4b - Homo sapiens (Human)</i></b>         |               |                  |                                    |              |                      |
| Q9H444                                                                              | 2             | 2.7369           | K.IEQELTAAK.K                      | 1            | CHM4B_HUMAN          |
| Q9H444                                                                              | 3             | 4.4901           | K.QLAQIDGTLSTIEFQR.E               | 3            | CHM4B_HUMAN          |
| Q9H444                                                                              | 3             | 4.5378           | R.LRDTEEMLSK.K                     | 6            | CHM4B_HUMAN          |
| Q9H444                                                                              | 2             | 4.1112           | R.LRDTEEM#LSK.K                    | 3            | CHM4B_HUMAN          |
| Q9H444                                                                              | 3             | 3.8724           | R.LRDTEEMLSKK.Q                    | 1            | CHM4B_HUMAN          |
| Q9H444                                                                              | 2             | 3.9603           | R.EALENANTNTEVLK.N                 | 2            | CHM4B_HUMAN          |
| Q9H444                                                                              | 1             | 2.5308           | K.NMGYAAK.A                        | 8            | CHM4B_HUMAN          |
| Q9H444                                                                              | 3             | 4.081            | K.KKEEEDDDMKELENWAGSM#.-           | 1            | CHM4B_HUMAN          |
| Q9H444                                                                              | 1             | 3.9701           | K.KIEQELTAAK.K                     | 7            | CHM4B_HUMAN          |
| Q9H444                                                                              | 2             | 2.8289           | K.GGPTPQEIQR.L                     | 2            | CHM4B_HUMAN          |
| Q9H444                                                                              | 3             | 4.0145           | K.KIEQELTAAK.H                     | 6            | CHM4B_HUMAN          |
| <b><i>Charged multivesicular body protein 5 - Homo sapiens (Human)</i></b>          |               |                  |                                    |              |                      |
| Q9NZZ3                                                                              | 3             | 7.2902           | R.DNLAQQSFNM#EQANYTIQSLK.D         | 3            | CHMP5_HUMAN          |
| Q9NZZ3                                                                              | 1             | 2.7991           | R.LDAELVK.Y                        | 2            | CHMP5_HUMAN          |
| Q9NZZ3                                                                              | 3             | 7.8219           | R.DNLAQQSFNMEQANYTIQSLK.D          | 3            | CHMP5_HUMAN          |
| Q9NZZ3                                                                              | 2             | 3.8334           | K.ISRLDAELVK.Y                     | 4            | CHMP5_HUMAN          |
| Q9NZZ3                                                                              | 2             | 4.0659           | K.APPPSLTDCIGTVDSR.A               | 8            | CHMP5_HUMAN          |
| Q9NZZ3                                                                              | 2             | 3.195            | K.RMYEQQR.D                        | 7            | CHMP5_HUMAN          |
| <b><i>Charged multivesicular body protein 6 - Homo sapiens (Human)</i></b>          |               |                  |                                    |              |                      |
| Q96FZ7                                                                              | 2             | 2.9878           | R.ILDETQEAVEYQR.Q                  | 1            | CHMP6_HUMAN          |
| <b><i>Chloride channel CLIC-like protein 1 precursor - Homo sapiens (Human)</i></b> |               |                  |                                    |              |                      |
| Q96S66                                                                              | 3             | 3.9026           | K.AQLKSEAAGSPDQGSTYSPAR.G          | 1            | CLCC1_HUMAN          |
| Q96S66                                                                              | 3             | 5.5287           | K.ESSTESSQSAKPVSGQDTSNTEGSPAEEK.   | 1            | CLCC1_HUMAN          |
| <b><i>Chloride intracellular channel protein 1 - Homo sapiens (Human)</i></b>       |               |                  |                                    |              |                      |
| O00299                                                                              | 2             | 4.1171           | K.LAALNPESNTAGLDIFAK.F             | 1            | CLIC1_HUMAN          |
| <b><i>Chondroitin sulfate proteoglycan 4 precursor - Homo sapiens (Human)</i></b>   |               |                  |                                    |              |                      |
| Q6UVK1                                                                              | 2             | 3.671            | K.SPPSAGYLVMSR.G                   | 1            | CSPG4_HUMAN          |
| Q6UVK1                                                                              | 2             | 4.032            | R.VTGALQFGELQK.Q                   | 2            | CSPG4_HUMAN          |
| Q6UVK1                                                                              | 2             | 2.7293           | R.FTQADVDSGR.L                     | 1            | CSPG4_HUMAN          |
| Q6UVK1                                                                              | 2             | 4.122            | R.LSDGQGFTQDDIQAGR.V               | 3            | CSPG4_HUMAN          |
| <b><i>Chromatin modifying protein 4A - Homo sapiens (Human)</i></b>                 |               |                  |                                    |              |                      |
| Q14D22                                                                              | 3             | 4.0535           | K.LPSVPSTHLPAGPAPKVDDEEALKQLAEWV   | 1            | Q14D22_HUMAN         |
| Q14D22                                                                              | 1             | 3.6689           | R.TMELAAQSMK.K                     | 5            | Q14D22_HUMAN         |
| Q14D22                                                                              | 3             | 4.1602           | R.FEQQLAQTDGTLSTLEFQREAIENATTNAEVL | 1            | Q14D22_HUMAN         |

| <i>Accession No*</i>                                             | <i>Charge</i> | <i>XC(Max)**</i> | <i>Peptide*</i>            | <i>TC***</i> | <i>Reference No*</i> |
|------------------------------------------------------------------|---------------|------------------|----------------------------|--------------|----------------------|
| Q14D22                                                           | 2             | 4.4763           | R.EAIENATTNAEVL.R.T        | 4            | Q14D22_HUMAN         |
| Q14D22                                                           | 3             | 4.9987           | K.RFEQQLAQTDTGLSTLEFQR.E   | 4            | Q14D22_HUMAN         |
| Q14D22                                                           | 2             | 3.0397           | K.RAALQALR.R               | 2            | Q14D22_HUMAN         |
| Q14D22                                                           | 3             | 4.6483           | K.KQEFLEQKIQEQLQTAK.K      | 2            | Q14D22_HUMAN         |
| Q14D22                                                           | 2             | 2.9087           | K.KQEFLEQK.I               | 2            | Q14D22_HUMAN         |
| Q14D22                                                           | 2             | 2.7389           | K.IQQELQTAKK.Y             | 1            | Q14D22_HUMAN         |
| Q14D22                                                           | 2             | 3.2013           | K.IQQELQTAK.K              | 1            | Q14D22_HUMAN         |
| Q14D22                                                           | 2             | 2.9975           | K.EKGPTPEEAIQK.L           | 2            | Q14D22_HUMAN         |
| Q14D22                                                           | 2             | 3.1883           | R.TMELAAQSMKK.A            | 2            | Q14D22_HUMAN         |
| Q14D22                                                           | 3             | 5.9085           | K.KRFEQQLAQTDTGLSTLEFQR.E  | 3            | Q14D22_HUMAN         |
| <b><i>Chromobox protein homolog 1 - Homo sapiens (Human)</i></b> |               |                  |                            |              |                      |
| P83916                                                           | 2             | 3.7682           | K.NSDEADLVPAK.E            | 4            | CBX1_HUMAN           |
| P83916                                                           | 2             | 5.0474           | K.WKNSDEADLVPAKEANVK.C     | 1            | CBX1_HUMAN           |
| P83916                                                           | 2             | 4.6284           | K.NSDEADLVPAKEANVK.C       | 6            | CBX1_HUMAN           |
| P83916                                                           | 3             | 4.5768           | R.GLEPERIIGATDSSGELMFLMK.W | 3            | CBX1_HUMAN           |
| P83916                                                           | 3             | 4.7687           | K.KVEEVLEEEEEYYVVEK.V      | 5            | CBX1_HUMAN           |
| P83916                                                           | 2             | 2.894            | K.GKVEYLLK.W               | 2            | CBX1_HUMAN           |
| P83916                                                           | 2             | 3.2955           | K.VEEVLEEEEEYYVVEK.V       | 1            | CBX1_HUMAN           |
| <b><i>Chromobox protein homolog 3 - Homo sapiens (Human)</i></b> |               |                  |                            |              |                      |
| Q13185                                                           | 2             | 5.2882           | K.WKDSDEADLVLAKE           | 10           | CBX3_HUMAN           |
| Q13185                                                           | 3             | 4.5951           | R.RVVGKVEYFLK.W            | 2            | CBX3_HUMAN           |
| Q13185                                                           | 2             | 3.7287           | R.VVNGKVEYFLK.W            | 2            | CBX3_HUMAN           |
| Q13185                                                           | 2             | 3.544            | R.LTWHSCPEDEAQ.-           | 5            | CBX3_HUMAN           |
| Q13185                                                           | 3             | 4.9268           | R.KSLSDSESDDSKSK.K         | 2            | CBX3_HUMAN           |
| Q13185                                                           | 2             | 3.8049           | R.KSLSDSESDDSK.S           | 1            | CBX3_HUMAN           |
| Q13185                                                           | 2             | 4.091            | K.VEEAEPEEFVVEK.V          | 5            | CBX3_HUMAN           |
| Q13185                                                           | 2             | 4.1556           | K.SLSDSESDDSKSK.K          | 6            | CBX3_HUMAN           |
| Q13185                                                           | 2             | 3.619            | K.SLSDSESDDSK.S            | 5            | CBX3_HUMAN           |
| Q13185                                                           | 2             | 3.6324           | K.SKKVEEAPEEFVVEK.V        | 2            | CBX3_HUMAN           |
| Q13185                                                           | 2             | 4.2671           | K.DSDEADLVLAKE             | 4            | CBX3_HUMAN           |
| Q13185                                                           | 2             | 5.9361           | K.KVEEAPEEFVVEK.V          | 6            | CBX3_HUMAN           |
| <b><i>Chromobox protein homolog 5 - Homo sapiens (Human)</i></b> |               |                  |                            |              |                      |
| P45973                                                           | 2             | 3.6464           | R.KSNFNSADDIK.S            | 1            | CBX5_HUMAN           |
| P45973                                                           | 3             | 3.9953           | R.LTWHAYPEDAENKEK.E        | 1            | CBX5_HUMAN           |
| P45973                                                           | 2             | 3.0372           | K.REQSNDIAR.G              | 1            | CBX5_HUMAN           |



| <i>Accession No*</i>                                                                       | <i>Charge</i> | <i>XC(Max)**</i> | <i>Peptide*</i>                 | <i>TC***</i> | <i>Reference No*</i> |
|--------------------------------------------------------------------------------------------|---------------|------------------|---------------------------------|--------------|----------------------|
| P45973                                                                                     | 2             | 2.9408           | K.KREQSNDIAR.G                  | 2            | CBX5_HUMAN           |
| P45973                                                                                     | 2             | 3.0355           | K.SNFSNSADDIK.S                 | 1            | CBX5_HUMAN           |
| <b><i>Chromodomain Y-like protein - Homo sapiens (Human)</i></b>                           |               |                  |                                 |              |                      |
| Q9Y232                                                                                     | 2             | 2.9993           | K.NSQLFAASQK.F                  | 2            | CDYL1_HUMAN          |
| Q9Y232                                                                                     | 4             | 6.114            | R.TAVDGFQSESPKLDPVEQQQEDTVAPEVA | 2            | CDYL1_HUMAN          |
| <b><i>Chromodomain-helicase-DNA-binding protein 2 - Homo sapiens (Human)</i></b>           |               |                  |                                 |              |                      |
| O14647                                                                                     | 2             | 2.878            | K.NNPDYNNWVR.K                  | 1            | CHD2_HUMAN           |
| <b><i>Chromodomain-helicase-DNA-binding protein 6 - Homo sapiens (Human)</i></b>           |               |                  |                                 |              |                      |
| Q8TD26                                                                                     | 2             | 3.331            | R.SPEESTESTDSQK.R               | 2            | CHD6_HUMAN           |
| <b><i>Chromodomain-helicase-DNA-binding protein 8 - Homo sapiens (Human)</i></b>           |               |                  |                                 |              |                      |
| Q9HCK8                                                                                     | 3             | 3.8873           | K.VLSASEVAALSSPASSAPHSGGK.T     | 1            | CHD8_HUMAN           |
| <b><i>Chromosome 20 open reading frame 3 - Homo sapiens (Human)</i></b>                    |               |                  |                                 |              |                      |
| A2A2F9                                                                                     | 2             | 3.4482           | -.VVTDDDGQAPEAK.D               | 1            | A2A2F9_HUMAN         |
| <b><i>Ciliary dynein heavy chain 8 - Homo sapiens (Human)</i></b>                          |               |                  |                                 |              |                      |
| Q96JB1                                                                                     | 2             | 2.7747           | R.DEMDEITQGLISVMK.R             | 1            | DYH8_HUMAN           |
| <b><i>Cingulin - Homo sapiens (Human)</i></b>                                              |               |                  |                                 |              |                      |
| Q9P2M7                                                                                     | 3             | 4.6791           | R.LASSEGFQKPSASLSQLESQNQLLQER.L | 1            | CING_HUMAN           |
| <b><i>Cingulin-like protein 1 - Homo sapiens (Human)</i></b>                               |               |                  |                                 |              |                      |
| Q0VF96                                                                                     | 3             | 4.0586           | R.QLLEQTLKDLEYELEAK.S           | 2            | Q0VF96_HUMAN         |
| Q0VF96                                                                                     | 2             | 4.3672           | K.GQQELTQQTNEETAK.Q             | 1            | Q0VF96_HUMAN         |
| Q0VF96                                                                                     | 3             | 4.0455           | R.SQHNEKVEENSTLQQR.L            | 1            | Q0VF96_HUMAN         |
| Q0VF96                                                                                     | 2             | 4.856            | R.SNTSEQDQAGTEMR.V              | 4            | Q0VF96_HUMAN         |
| Q0VF96                                                                                     | 2             | 4.1063           | R.SNTSEQDQAGTEM#R.V             | 2            | Q0VF96_HUMAN         |
| Q0VF96                                                                                     | 2             | 4.411            | R.ALENELEAAQGNLSQTTQEYK.Q       | 3            | Q0VF96_HUMAN         |
| Q0VF96                                                                                     | 2             | 3.8472           | K.VLETEGSQESTVIR.A              | 2            | Q0VF96_HUMAN         |
| Q0VF96                                                                                     | 2             | 3.7335           | K.NQQNIKEERER.M                 | 2            | Q0VF96_HUMAN         |
| Q0VF96                                                                                     | 2             | 3.913            | K.GALIEELLQAK.Q                 | 4            | Q0VF96_HUMAN         |
| Q0VF96                                                                                     | 4             | 5.0791           | K.QMEDKVSQLEMELEEEERNNSDLLSER.I | 1            | Q0VF96_HUMAN         |
| <b><i>Cisplatin resistance-associated overexpressed protein - Homo sapiens (Human)</i></b> |               |                  |                                 |              |                      |
| O95232                                                                                     | 3             | 4.4874           | K.ESDTKNEVNGTSEDIKSEGDTQSN.-    | 2            | CROP_HUMAN           |
| <b><i>C-jun-amino-terminal kinase-interacting protein 4 - Homo sapiens (Human)</i></b>     |               |                  |                                 |              |                      |
| O60271                                                                                     | 3             | 4.9777           | K.LHQLSGSDQLESTAHSR.I           | 2            | JIP4_HUMAN           |
| O60271                                                                                     | 2             | 3.315            | R.VESLESQTR.Q                   | 2            | JIP4_HUMAN           |
| O60271                                                                                     | 2             | 4.2137           | R.EVENLILENTQLLET.K.N           | 1            | JIP4_HUMAN           |
| O60271                                                                                     | 2             | 2.7701           | R.ETDYPAGEDLSESGQVDK.A          | 1            | JIP4_HUMAN           |

| <i>Accession No*</i>                                        | <i>Charge</i> | <i>XC(Max)**</i> | <i>Peptide*</i>                    | <i>TC***</i> | <i>Reference No*</i> |
|-------------------------------------------------------------|---------------|------------------|------------------------------------|--------------|----------------------|
| O60271                                                      | 2             | 3.1632           | K.FQELSQPR.S                       | 3            | JIP4_HUMAN           |
| O60271                                                      | 3             | 5.8404           | K.ERPISLGIPLPAGDGLLTPDAQK.G        | 5            | JIP4_HUMAN           |
| O60271                                                      | 2             | 4.4563           | K.AFDLSEETEASLASR.R                | 1            | JIP4_HUMAN           |
| O60271                                                      | 3             | 3.7146           | K.ATTPASTANSDVATIPTDTPLKEENEGFVK.V | 1            | JIP4_HUMAN           |
| O60271                                                      | 2             | 4.0007           | K.HIEVQVAQETR.N                    | 2            | JIP4_HUMAN           |
| <b><i>Clathrin interactor 1 - Homo sapiens (Human)</i></b>  |               |                  |                                    |              |                      |
| Q14677                                                      | 2             | 4.4045           | K.LGELSDKIGSTIDDTISK.F             | 4            | EPN4_HUMAN           |
| Q14677                                                      | 2             | 3.2596           | R.SQNTDMVQK.S                      | 2            | EPN4_HUMAN           |
| Q14677                                                      | 2             | 3.412            | K.QDAFANFANFSK.-                   | 2            | EPN4_HUMAN           |
| Q14677                                                      | 2             | 4.931            | K.HIHITQATETTTTR.H                 | 4            | EPN4_HUMAN           |
| Q14677                                                      | 2             | 4.1788           | K.GEFKDEEETVTTK.H                  | 2            | EPN4_HUMAN           |
| Q14677                                                      | 2             | 3.8101           | K.ASPDQNASTHTPQSSVK.T              | 1            | EPN4_HUMAN           |
| Q14677                                                      | 3             | 3.8947           | R.SPKGFEKDEEETVTTK.H               | 1            | EPN4_HUMAN           |
| <b><i>Clathrin light chain A - Homo sapiens (Human)</i></b> |               |                  |                                    |              |                      |
| P09496                                                      | 1             | 2.5357           | R.LCDFNPK.S                        | 8            | CLCA_HUMAN           |
| P09496                                                      | 2             | 3.1365           | R.LQSEPEIRK.W                      | 2            | CLCA_HUMAN           |
| P09496                                                      | 2             | 3.1965           | R.LQSEPEIRK.K                      | 1            | CLCA_HUMAN           |
| P09496                                                      | 2             | 3.0662           | R.LEALDANSR.Q                      | 2            | CLCA_HUMAN           |
| P09496                                                      | 2             | 4.6894           | K.AIKELEEWYARQDEQLQK.T             | 3            | CLCA_HUMAN           |
| P09496                                                      | 2             | 3.3462           | R.LEALDANSR.K                      | 7            | CLCA_HUMAN           |
| P09496                                                      | 2             | 4.0546           | R.EEQMERLEALDANSR.K                | 4            | CLCA_HUMAN           |
| P09496                                                      | 2             | 3.1986           | K.WREEQMERLEALDANSR.K              | 2            | CLCA_HUMAN           |
| P09496                                                      | 2             | 4.211            | K.ELEEWYARQDEQLQK.T                | 3            | CLCA_HUMAN           |
| P09496                                                      | 2             | 3.1494           | K.WREEQMER.L                       | 5            | CLCA_HUMAN           |
| P09496                                                      | 2             | 4.4843           | K.AIKELEEWYAR.Q                    | 6            | CLCA_HUMAN           |
| P09496                                                      | 2             | 3.3991           | R.KQEAEWKEK.A                      | 1            | CLCA_HUMAN           |
| <b><i>Clathrin light chain B - Homo sapiens (Human)</i></b> |               |                  |                                    |              |                      |
| P09497                                                      | 3             | 5.3901           | R.LQELDAASKVTEQEWR.E               | 7            | CLCB_HUMAN           |
| P09497                                                      | 2             | 3.1257           | R.LTQEPESIR.K                      | 1            | CLCB_HUMAN           |
| P09497                                                      | 1             | 2.9208           | R.LQELDAASK.V                      | 8            | CLCB_HUMAN           |
| P09497                                                      | 2             | 3.1658           | R.KRLQELDAASK.V                    | 2            | CLCB_HUMAN           |
| P09497                                                      | 2             | 3.016            | K.VTEQEWR.E                        | 2            | CLCB_HUMAN           |
| P09497                                                      | 2             | 2.7329           | K.VTEQEWR.E                        | 1            | CLCB_HUMAN           |
| P09497                                                      | 3             | 3.729            | K.RLQELDAASKVTEQEWR.E              | 1            | CLCB_HUMAN           |
| P09497                                                      | 2             | 3.0719           | K.RLQELDAASK.V                     | 3            | CLCB_HUMAN           |

| <i>Accession No*</i>                                                                         | <i>Charge</i> | <i>XC(Max)**</i> | <i>Peptide*</i>               | <i>TC***</i> | <i>Reference No*</i> |
|----------------------------------------------------------------------------------------------|---------------|------------------|-------------------------------|--------------|----------------------|
| P09497                                                                                       | 2             | 3.33             | K.KDLEEWNR.Q                  | 2            | CLCB_HUMAN           |
| P09497                                                                                       | 2             | 3.1844           | K.ESKEETPGTEWEK.V             | 3            | CLCB_HUMAN           |
| P09497                                                                                       | 2             | 3.3731           | K.DLEEWNR.Q                   | 4            | CLCB_HUMAN           |
| P09497                                                                                       | 3             | 4.0964           | K.AKKDLEEWNR.Q                | 3            | CLCB_HUMAN           |
| P09497                                                                                       | 2             | 3.0919           | R.LTQEPESIRK.W                | 2            | CLCB_HUMAN           |
| P09497                                                                                       | 1             | 3.8528           | K.VAQLCDFNPK.S                | 14           | CLCB_HUMAN           |
| <b><i>Cleavage and polyadenylation specificity factor 6 - Homo sapiens (Human)</i></b>       |               |                  |                               |              |                      |
| Q16630                                                                                       | 2             | 3.013            | K.QFLSQFEM#QSR.K              | 1            | CPSF6_HUMAN          |
| Q16630                                                                                       | 3             | 4.8342           | R.AVSDASAGDYGSAIETLVTAISLIK.Q | 1            | CPSF6_HUMAN          |
| Q16630                                                                                       | 2             | 5.0897           | R.TPLSEAEFEEIMNR.N            | 4            | CPSF6_HUMAN          |
| <b><i>Cleavage stimulation factor 64 kDa subunit - Homo sapiens (Human)</i></b>              |               |                  |                               |              |                      |
| P33240                                                                                       | 2             | 2.9244           | R.GSLPANVPTPR.G               | 1            | CSTF2_HUMAN          |
| <b><i>Cleavage stimulation factor 64 kDa subunit, tau variant - Homo sapiens (Human)</i></b> |               |                  |                               |              |                      |
| Q9H0L4                                                                                       | 2             | 3.3662           | R.AMETEVLETR.V                | 1            | CSTFT_HUMAN          |
| Q9H0L4                                                                                       | 3             | 5.3225           | R.GPMTGGIQGPGPINIGAGPPQGPR.Q  | 1            | CSTFT_HUMAN          |
| <b><i>CLIP-associating protein 1 - Homo sapiens (Human)</i></b>                              |               |                  |                               |              |                      |
| Q7Z460                                                                                       | 2             | 4.8618           | K.LLGSYGGLTGGSSR.G            | 4            | CLAP1_HUMAN          |
| Q7Z460                                                                                       | 2             | 3.0774           | R.AQTTNSNSSSSSDVSTHS.-        | 1            | CLAP1_HUMAN          |
| Q7Z460                                                                                       | 2             | 3.6595           | R.DGGAASPATEGR.G              | 4            | CLAP1_HUMAN          |
| Q7Z460                                                                                       | 2             | 4.4484           | R.QSSGSATNVASTPDNR.G          | 3            | CLAP1_HUMAN          |
| Q7Z460                                                                                       | 2             | 3.302            | R.RQSSGSATNVASTPDNR.G         | 1            | CLAP1_HUMAN          |
| <b><i>Clusterin precursor - Homo sapiens (Human)</i></b>                                     |               |                  |                               |              |                      |
| P10909                                                                                       | 2             | 3.4205           | K.TLLSNLEEAK.K                | 2            | CLUS_HUMAN           |
| P10909                                                                                       | 2             | 5.8935           | R.VTTVASHTSDSDVPSGVTEVVVK.L   | 4            | CLUS_HUMAN           |
| P10909                                                                                       | 2             | 2.827            | R.KYNELLK.S                   | 1            | CLUS_HUMAN           |
| P10909                                                                                       | 2             | 4.1371           | R.KTLLSNLEEAKK.K              | 6            | CLUS_HUMAN           |
| P10909                                                                                       | 2             | 4.1083           | R.KTLLSNLEEAK.K               | 5            | CLUS_HUMAN           |
| P10909                                                                                       | 2             | 3.7331           | K.TLLSNLEEAKK.K               | 2            | CLUS_HUMAN           |
| P10909                                                                                       | 2             | 3.4479           | R.ELDESLQVAER.L               | 3            | CLUS_HUMAN           |
| P10909                                                                                       | 2             | 3.3966           | K.LFDSDPITVTPVEVSR.K          | 1            | CLUS_HUMAN           |
| P10909                                                                                       | 1             | 2.3564           | K.FMETVAEK.A                  | 1            | CLUS_HUMAN           |
| P10909                                                                                       | 2             | 5.2034           | K.YVNKEIQNAVNGVK.Q            | 2            | CLUS_HUMAN           |
| <b><i>c-Myc-responsive protein Rcl - Homo sapiens (Human)</i></b>                            |               |                  |                               |              |                      |
| O43598                                                                                       | 3             | 5.91             | R.FGTVLTEHVAAAELGAR.G         | 7            | RCL_HUMAN            |
| O43598                                                                                       | 3             | 4.4622           | R.RFGTVLTEHVAAAELGAR.G        | 3            | RCL_HUMAN            |

| <i>Accession No*</i>                                                                 | <i>Charge</i> | <i>XC(Max)**</i> | <i>Peptide*</i>                  | <i>TC***</i> | <i>Reference No*</i> |
|--------------------------------------------------------------------------------------|---------------|------------------|----------------------------------|--------------|----------------------|
| <b><i>CNKSR family member 3 - Homo sapiens (Human)</i></b>                           |               |                  |                                  |              |                      |
| Q5SGD5                                                                               | 2             | 2.8913           | R.IPPIIEESSPPYR.F                | 1            | Q5SGD5_HUMA          |
| <b><i>Coagulation factor IX precursor - Homo sapiens (Human)</i></b>                 |               |                  |                                  |              |                      |
| P00740                                                                               | 2             | 3.6098           | K.FGSGYVSGWGR.V                  | 1            | FA9_HUMAN            |
| <b><i>Coatomer subunit beta' - Homo sapiens (Human)</i></b>                          |               |                  |                                  |              |                      |
| P35606                                                                               | 2             | 3.9623           | R.NVMEEGKDFQPSR.S                | 1            | COPB2_HUMAN          |
| <b><i>Coatomer subunit epsilon - Homo sapiens (Human)</i></b>                        |               |                  |                                  |              |                      |
| O14579                                                                               | 2             | 3.1751           | K.ENDFDRLVLQYAPSA.-              | 1            | COPE_HUMAN           |
| <b><i>Cofilin-1 - Homo sapiens (Human)</i></b>                                       |               |                  |                                  |              |                      |
| P23528                                                                               | 2             | 3.726            | R.KSSTPEEVKK.R                   | 12           | COF1_HUMAN           |
| P23528                                                                               | 2             | 5.4504           | K.EILVGDVGQTVDDPYATFVK.M         | 3            | COF1_HUMAN           |
| P23528                                                                               | 3             | 4.6163           | K.HELQANCYEEVKDR.C               | 1            | COF1_HUMAN           |
| P23528                                                                               | 2             | 4.7926           | K.LGGSAVISLEGKPL.-               | 53           | COF1_HUMAN           |
| P23528                                                                               | 3             | 5.5788           | K.LTGIKHELQANCYEEVKDR.C          | 3            | COF1_HUMAN           |
| P23528                                                                               | 2             | 3.1054           | K.MLPDKDCR.Y                     | 1            | COF1_HUMAN           |
| P23528                                                                               | 2             | 3.6561           | K.NIILEEGKEILVGDVGQTVDDPYATFVK.M | 2            | COF1_HUMAN           |
| P23528                                                                               | 2             | 3.2404           | R.KSSTPEEVK.K                    | 6            | COF1_HUMAN           |
| P23528                                                                               | 2             | 3.197            | K.AVLFCLSEDKK.N                  | 2            | COF1_HUMAN           |
| <b><i>Cofilin-2 - Homo sapiens (Human)</i></b>                                       |               |                  |                                  |              |                      |
| Q9Y281                                                                               | 2             | 3.4594           | K.LGGNVVVSLEGKPL.-               | 2            | COF2_HUMAN           |
| <b><i>Coiled-coil and C2 domain-containing protein 1A - Homo sapiens (Human)</i></b> |               |                  |                                  |              |                      |
| Q6P1N0                                                                               | 2             | 2.9671           | K.LANQDEGPEDEEDEVPK.K            | 1            | C2D1A_HUMAN          |
| Q6P1N0                                                                               | 2             | 3.4788           | R.TPQSGSAPTAK.A                  | 1            | C2D1A_HUMAN          |
| Q6P1N0                                                                               | 2             | 2.9776           | R.YQVAAAQAK.S                    | 1            | C2D1A_HUMAN          |
| <b><i>Coiled-coil and C2 domain-containing protein 1B - Homo sapiens (Human)</i></b> |               |                  |                                  |              |                      |
| Q5T0F9                                                                               | 2             | 3.4575           | R.FGAVLEALEK.G                   | 2            | C2D1B_HUMAN          |
| <b><i>Coiled-coil domain-containing protein 102A - Homo sapiens (Human)</i></b>      |               |                  |                                  |              |                      |
| Q96A19                                                                               | 2             | 3.5339           | R.MSEDLEDELGAR.S                 | 1            | C102A_HUMAN          |
| Q96A19                                                                               | 3             | 4.0898           | R.SLDEQTEQSENQVQLEHLQSR.L        | 2            | C102A_HUMAN          |
| Q96A19                                                                               | 2             | 2.8932           | R.LQAENAAEWGR.R                  | 1            | C102A_HUMAN          |
| Q96A19                                                                               | 3             | 4.3013           | R.DVGSERPPGSQELELVESLLK.S        | 1            | C102A_HUMAN          |
| Q96A19                                                                               | 2             | 2.975            | K.GSLLTILGSPSPER.M               | 1            | C102A_HUMAN          |
| Q96A19                                                                               | 2             | 2.9038           | K.ELAQAEDDELDEAHNQAR.K           | 1            | C102A_HUMAN          |
| <b><i>Coiled-coil domain-containing protein 104 - Homo sapiens (Human)</i></b>       |               |                  |                                  |              |                      |
| Q96G28                                                                               | 2             | 3.3009           | R.TKQIQNMEQK.G                   | 1            | CC104_HUMAN          |

| <i>Accession No*</i>                                                                    | <i>Charge</i> | <i>XC(Max)**</i> | <i>Peptide*</i>                  | <i>TC***</i> | <i>Reference No*</i> |
|-----------------------------------------------------------------------------------------|---------------|------------------|----------------------------------|--------------|----------------------|
| Q96G28                                                                                  | 2             | 3.167            | K.NIEMQLQAIR.I                   | 2            | CC104_HUMAN          |
| <b><i>Coiled-coil domain-containing protein 117 - Homo sapiens (Human)</i></b>          |               |                  |                                  |              |                      |
| Q8IWD4                                                                                  | 2             | 3.2131           | K.HVAAGTAFPQR.T                  | 1            | CC117_HUMAN          |
| <b><i>Coiled-coil domain-containing protein 12 - Homo sapiens (Human)</i></b>           |               |                  |                                  |              |                      |
| Q8WUD4                                                                                  | 3             | 4.5732           | K.VKEQLEAAKPEPVIEEVDLANLAPR.K    | 2            | CCD12_HUMAN          |
| <b><i>Coiled-coil domain-containing protein 124 - Homo sapiens (Human)</i></b>          |               |                  |                                  |              |                      |
| Q96CT7                                                                                  | 2             | 2.8906           | R.LKQENPNMR.L                    | 2            | CC124_HUMAN          |
| Q96CT7                                                                                  | 2             | 3.3765           | R.SPDPNPMNQR.A                   | 2            | CC124_HUMAN          |
| Q96CT7                                                                                  | 2             | 3.3932           | R.SPDPNPM#NQR.A                  | 12           | CC124_HUMAN          |
| Q96CT7                                                                                  | 2             | 4.0558           | R.VLEEGSVEAR.T                   | 5            | CC124_HUMAN          |
| Q96CT7                                                                                  | 2             | 2.9811           | R.RLDQLER.K                      | 1            | CC124_HUMAN          |
| Q96CT7                                                                                  | 2             | 5.1333           | R.AAFTAEEAQLPR.L                 | 7            | CC124_HUMAN          |
| Q96CT7                                                                                  | 2             | 3.8843           | K.SHLEVPLEENVNR.R                | 3            | CC124_HUMAN          |
| Q96CT7                                                                                  | 2             | 4.3339           | R.LLEEEDSKLKGK.A                 | 2            | CC124_HUMAN          |
| Q96CT7                                                                                  | 2             | 3.3516           | R.LLEEEDSKL.K                    | 4            | CC124_HUMAN          |
| <b><i>Coiled-coil domain-containing protein 128 - Homo sapiens (Human)</i></b>          |               |                  |                                  |              |                      |
| Q6ZMI0                                                                                  | 3             | 3.748            | K.KGVVDEQANSAALKEQLK.M           | 1            | CC128_HUMAN          |
| <b><i>Coiled-coil domain-containing protein 137 - Homo sapiens (Human)</i></b>          |               |                  |                                  |              |                      |
| Q6PK04                                                                                  | 2             | 2.9064           | K.NQDEQEIPFR.L                   | 2            | CC137_HUMAN          |
| Q6PK04                                                                                  | 3             | 4.0208           | R.KGESDGAYIHR.M                  | 2            | CC137_HUMAN          |
| <b><i>Coiled-coil domain-containing protein 16 - Homo sapiens (Human)</i></b>           |               |                  |                                  |              |                      |
| Q96NB3                                                                                  | 3             | 5.2684           | R.ENTAEALPEGFFDDPEVDAR.V         | 1            | CCD16_HUMAN          |
| Q96NB3                                                                                  | 3             | 5.884            | R.RENTAEALPEGFFDDPEVDAR.V        | 2            | CCD16_HUMAN          |
| Q96NB3                                                                                  | 3             | 4.8813           | R.ATPSKPSGLSLLPDYEDEEEEEEEEGDGER | 3            | CCD16_HUMAN          |
| Q96NB3                                                                                  | 3             | 3.7012           | K.RVINQEELRR.L                   | 1            | CCD16_HUMAN          |
| Q96NB3                                                                                  | 2             | 3.7104           | K.EASQGSSASSAPQSVKR.K            | 2            | CCD16_HUMAN          |
| Q96NB3                                                                                  | 2             | 4.6593           | K.EASQGSSASSAPQSVK.R             | 5            | CCD16_HUMAN          |
| <b><i>Coiled-coil domain-containing protein 23 - Homo sapiens (Human)</i></b>           |               |                  |                                  |              |                      |
| Q8N300                                                                                  | 2             | 4.2229           | R.VMTELEQQQFDEFCK.Q              | 3            | CCD23_HUMAN          |
| <b><i>Coiled-coil domain-containing protein 28A - Homo sapiens (Human)</i></b>          |               |                  |                                  |              |                      |
| Q8IWP9                                                                                  | 3             | 4.5129           | K.GAQSTPIQHSFLTDVSDVQEMER.G      | 1            | CC28A_HUMAN          |
| Q8IWP9                                                                                  | 2             | 2.9667           | K.LHLADAQDVPNTSAS.-              | 2            | CC28A_HUMAN          |
| Q8IWP9                                                                                  | 2             | 4.0026           | R.GLLSLLNDFHSGK.L                | 1            | CC28A_HUMAN          |
| <b><i>Coiled-coil domain-containing protein 47 precursor - Homo sapiens (Human)</i></b> |               |                  |                                  |              |                      |
| Q96A33                                                                                  | 2             | 2.9892           | R.RLEEAAALR.R                    | 1            | CCD47_HUMAN          |

| <i>Accession No*</i>                                                          | <i>Charge</i> | <i>XC(Max)**</i> | <i>Peptide*</i>                   | <i>TC***</i> | <i>Reference No*</i> |
|-------------------------------------------------------------------------------|---------------|------------------|-----------------------------------|--------------|----------------------|
| <b><i>Coiled-coil domain-containing protein 50 - Homo sapiens (Human)</i></b> |               |                  |                                   |              |                      |
| Q8IVM0                                                                        | 3             | 3.9496           | R.KLQEEELLATQVDMR.A               | 2            | CCD50_HUMAN          |
| Q8IVM0                                                                        | 2             | 5.1467           | R.MAHRDQEWYDAEIAR.K               | 2            | CCD50_HUMAN          |
| Q8IVM0                                                                        | 3             | 6.0654           | R.YKDLEQQDCEIAQEIQEK.L            | 7            | CCD50_HUMAN          |
| Q8IVM0                                                                        | 3             | 4.8127           | R.M#AHRDQEWYDAEIAR.K              | 2            | CCD50_HUMAN          |
| Q8IVM0                                                                        | 2             | 2.8481           | R.LVQHDLQVAK.Q                    | 1            | CCD50_HUMAN          |
| Q8IVM0                                                                        | 2             | 4.1771           | R.LLQEKELQEEK.K                   | 3            | CCD50_HUMAN          |
| Q8IVM0                                                                        | 2             | 2.8445           | R.LLMAEEK.K                       | 1            | CCD50_HUMAN          |
| Q8IVM0                                                                        | 2             | 4.1127           | R.KLQEEELLATQVDM#R.A              | 2            | CCD50_HUMAN          |
| Q8IVM0                                                                        | 2             | 3.5813           | R.IQEKKDEDIAR.L                   | 2            | CCD50_HUMAN          |
| Q8IVM0                                                                        | 3             | 6.4327           | R.DFAVLEDHTLAHSLQEQEIEHHLASNVQR.N | 2            | CCD50_HUMAN          |
| Q8IVM0                                                                        | 2             | 3.9046           | R.AYADSYYYEDGGMKPR.V              | 3            | CCD50_HUMAN          |
| Q8IVM0                                                                        | 2             | 2.9901           | R.AYADSYYYEDGGM#KPR.V             | 1            | CCD50_HUMAN          |
| Q8IVM0                                                                        | 2             | 3.5539           | R.AAQAQDEEIAR.L                   | 2            | CCD50_HUMAN          |
| Q8IVM0                                                                        | 1             | 2.1558           | K.LAIEAER.R                       | 1            | CCD50_HUMAN          |
| Q8IVM0                                                                        | 2             | 3.3676           | K.QLQEEDLKAQAQLQK.R               | 2            | CCD50_HUMAN          |
| <b><i>Coiled-coil domain-containing protein 53 - Homo sapiens (Human)</i></b> |               |                  |                                   |              |                      |
| Q9Y3C0                                                                        | 2             | 3.0055           | K.M#VQVGVPMMAIR.N                 | 2            | CCD53_HUMAN          |
| Q9Y3C0                                                                        | 2             | 3.3698           | K.MVQVGVPMMAIR.N                  | 3            | CCD53_HUMAN          |
| <b><i>Coiled-coil domain-containing protein 55 - Homo sapiens (Human)</i></b> |               |                  |                                   |              |                      |
| Q9H0G5                                                                        | 2             | 2.8721           | R.NNEETVMSAR.D                    | 2            | CCD55_HUMAN          |
| Q9H0G5                                                                        | 2             | 4.2419           | R.NQEKPSNSESSLGAK.H               | 2            | CCD55_HUMAN          |
| Q9H0G5                                                                        | 2             | 3.6308           | K.RNNEETVMSAR.D                   | 3            | CCD55_HUMAN          |
| Q9H0G5                                                                        | 2             | 2.8557           | K.HRLTEEGQEK.G                    | 1            | CCD55_HUMAN          |
| Q9H0G5                                                                        | 2             | 4.9839           | R.HLLNQAVGEEVVK.C                 | 2            | CCD55_HUMAN          |
| <b><i>Coiled-coil domain-containing protein 56 - Homo sapiens (Human)</i></b> |               |                  |                                   |              |                      |
| Q9Y2R0                                                                        | 2             | 3.4321           | K.RGEAPFAQR.I                     | 2            | CCD56_HUMAN          |
| <b><i>Coiled-coil domain-containing protein 58 - Homo sapiens (Human)</i></b> |               |                  |                                   |              |                      |
| Q4VC31                                                                        | 2             | 3.8804           | K.WMQSELNVEEVNDNR.S               | 2            | CCD58_HUMAN          |
| Q4VC31                                                                        | 3             | 4.1805           | R.TIDDRIVHELNTTVPTASFAGK.I        | 2            | CCD58_HUMAN          |
| <b><i>Coiled-coil domain-containing protein 6 - Homo sapiens (Human)</i></b>  |               |                  |                                   |              |                      |
| Q16204                                                                        | 3             | 5.3304           | R.KLM#QLQHEKGELEQHLEQEQEFQVNK.L   | 1            | CCDC6_HUMAN          |
| <b><i>Coiled-coil domain-containing protein 7 - Homo sapiens (Human)</i></b>  |               |                  |                                   |              |                      |
| Q96M83                                                                        | 3             | 3.8248           | K.IQEYPQITAQSGRLIEK.R             | 1            | CCDC7_HUMAN          |
| <b><i>Coiled-coil domain-containing protein 71 - Homo sapiens (Human)</i></b> |               |                  |                                   |              |                      |

| <i>Accession No*</i>                                                                                 | <i>Charge</i> | <i>XC(Max)**</i> | <i>Peptide*</i>             | <i>TC***</i> | <i>Reference No*</i> |
|------------------------------------------------------------------------------------------------------|---------------|------------------|-----------------------------|--------------|----------------------|
| Q8IV32                                                                                               | 1             | 2.1207           | K.GPGAGPR.R                 | 1            | CCD71_HUMAN          |
| <b><i>Coiled-coil domain-containing protein 72 - Homo sapiens (Human)</i></b>                        |               |                  |                             |              |                      |
| Q9Y2S6                                                                                               | 3             | 4.3885           | K.AAGKGPLATGGIKK.S          | 4            | CCD72_HUMAN          |
| Q9Y2S6                                                                                               | 2             | 3.0536           | K.GPLATGGIKK.S              | 1            | CCD72_HUMAN          |
| Q9Y2S6                                                                                               | 1             | 2.4519           | K.GPLATGGIK.K               | 2            | CCD72_HUMAN          |
| Q9Y2S6                                                                                               | 2             | 3.3331           | K.EMDEEDKAFKQK.Q            | 2            | CCD72_HUMAN          |
| Q9Y2S6                                                                                               | 2             | 2.721            | K.EM#DEEDKAFKQK.Q           | 1            | CCD72_HUMAN          |
| Q9Y2S6                                                                                               | 1             | 2.7472           | K.EMDEEDKAFK.Q              | 2            | CCD72_HUMAN          |
| <b><i>Coiled-coil domain-containing protein 86 - Homo sapiens (Human)</i></b>                        |               |                  |                             |              |                      |
| Q9H6F5                                                                                               | 3             | 4.7019           | K.KLNKEELPVIK.G             | 1            | CCD86_HUMAN          |
| Q9H6F5                                                                                               | 3             | 4.6356           | R.ALVEFESNPEETREPGSPPSVQR.A | 2            | CCD86_HUMAN          |
| Q9H6F5                                                                                               | 2             | 3.5671           | R.DTLALLQK.Q                | 2            | CCD86_HUMAN          |
| Q9H6F5                                                                                               | 2             | 3.2828           | R.KAEVVQVIR.N               | 2            | CCD86_HUMAN          |
| <b><i>Coiled-coil domain-containing protein 9 - Homo sapiens (Human)</i></b>                         |               |                  |                             |              |                      |
| Q9Y3X0                                                                                               | 2             | 4.5446           | R.SVEKENVAVESEK.N           | 3            | CCDC9_HUMAN          |
| Q9Y3X0                                                                                               | 2             | 2.7669           | R.KNEALIR.R                 | 1            | CCDC9_HUMAN          |
| Q9Y3X0                                                                                               | 2             | 2.7387           | K.EGAASPAPETPQPTSPETSPK.E   | 1            | CCDC9_HUMAN          |
| Q9Y3X0                                                                                               | 2             | 3.9539           | K.MNEEMEKIAEYER.N           | 2            | CCDC9_HUMAN          |
| Q9Y3X0                                                                                               | 3             | 5.3366           | R.SVEKENVAVESEKNLGPSR.R     | 3            | CCDC9_HUMAN          |
| Q9Y3X0                                                                                               | 2             | 3.4398           | R.EGVLEPNPVR.N              | 3            | CCDC9_HUMAN          |
| <b><i>Coiled-coil domain-containing protein 91 - Homo sapiens (Human)</i></b>                        |               |                  |                             |              |                      |
| Q7Z6B0                                                                                               | 2             | 2.8292           | K.RLDQVIR.Q                 | 1            | CCD91_HUMAN          |
| Q7Z6B0                                                                                               | 2             | 2.8963           | K.VSQEIQK.A                 | 2            | CCD91_HUMAN          |
| Q7Z6B0                                                                                               | 2             | 2.7062           | R.KISQETVK.A                | 1            | CCD91_HUMAN          |
| <b><i>Coiled-coil-helix-coiled-coil-helix domain-containing protein 3 - Homo sapiens (Human)</i></b> |               |                  |                             |              |                      |
| Q9NX63                                                                                               | 2             | 3.2715           | K.AAEEVEAK.F                | 3            | CHCH3_HUMAN          |
| Q9NX63                                                                                               | 2             | 4.1042           | R.YSGAYGASVSDEELK.R         | 1            | CHCH3_HUMAN          |
| <b><i>Coiled-coil-helix-coiled-coil-helix domain-containing protein 6 - Homo sapiens (Human)</i></b> |               |                  |                             |              |                      |
| Q9BRQ6                                                                                               | 2             | 3.674            | R.SGSSGGQQPSGMK.E           | 2            | CHCH6_HUMAN          |
| <b><i>Coiled-coil-helix-coiled-coil-helix domain-containing protein 8 - Homo sapiens (Human)</i></b> |               |                  |                             |              |                      |
| Q9NYJ1                                                                                               | 2             | 5.0633           | R.VKKDDEEDPLDQLISR.S        | 3            | Q9NYJ1_HUMA          |
| Q9NYJ1                                                                                               | 2             | 3.1484           | K.DCMSEQQAR.R               | 1            | Q9NYJ1_HUMA          |
| <b><i>Coilin - Homo sapiens (Human)</i></b>                                                          |               |                  |                             |              |                      |
| P38432                                                                                               | 3             | 4.7568           | K.LLELTSSYSPDVSDYKEGR.I     | 2            | P80C_HUMAN           |
| <b><i>Cold-inducible RNA-binding protein - Homo sapiens (Human)</i></b>                              |               |                  |                             |              |                      |

| <i>Accession No*</i>                                                       | <i>Charge</i> | <i>XC(Max)**</i> | <i>Peptide*</i>                  | <i>TC***</i> | <i>Reference No*</i> |
|----------------------------------------------------------------------------|---------------|------------------|----------------------------------|--------------|----------------------|
| Q14011                                                                     | 2             | 4.4056           | R.SSGGSYRDSYDSYATHNE.-           | 3            | CIRBP_HUMAN          |
| Q14011                                                                     | 2             | 3.7864           | R.DSYDSYATHNE.-                  | 9            | CIRBP_HUMAN          |
| <b><i>Collagen alpha-1(I) chain precursor - Homo sapiens (Human)</i></b>   |               |                  |                                  |              |                      |
| P02452                                                                     | 2             | 3.1469           | R.EGAPGAEGSPGR.D                 | 3            | CO1A1_HUMAN          |
| P02452                                                                     | 2             | 2.7846           | R.GVQGGPPGAGPR.G                 | 1            | CO1A1_HUMAN          |
| P02452                                                                     | 2             | 3.5411           | R.GQAGVM#GFPGPK.G                | 8            | CO1A1_HUMAN          |
| P02452                                                                     | 2             | 2.7354           | R.GPPGPM#GPPGLAGPPGESGR.E        | 1            | CO1A1_HUMAN          |
| P02452                                                                     | 3             | 4.3564           | R.GPAGPQGRGDKGETGEQGDR.G         | 3            | CO1A1_HUMAN          |
| P02452                                                                     | 1             | 3.0082           | R.GPAGPQGR.G                     | 28           | CO1A1_HUMAN          |
| P02452                                                                     | 2             | 2.8516           | K.GEAGPQGR.G                     | 10           | CO1A1_HUMAN          |
| P02452                                                                     | 2             | 5.6542           | R.GFSGLDGAKGDAGPAGPK.G           | 7            | CO1A1_HUMAN          |
| P02452                                                                     | 1             | 2.5014           | R.GFSGLDGAK.G                    | 9            | CO1A1_HUMAN          |
| P02452                                                                     | 2             | 4.8302           | R.GETGPAGPAGPVGPGAR.G            | 3            | CO1A1_HUMAN          |
| P02452                                                                     | 2             | 3.545            | K.GADGSPGKDGVR.G                 | 12           | CO1A1_HUMAN          |
| P02452                                                                     | 2             | 3.1931           | K.STGGISVPGPMGSPGR.G             | 5            | CO1A1_HUMAN          |
| P02452                                                                     | 2             | 5.5649           | K.DGEAGAQQPPGAGPAGER.G           | 12           | CO1A1_HUMAN          |
| P02452                                                                     | 3             | 3.739            | K.GDRGDAGPKGADGSPGK.D            | 1            | CO1A1_HUMAN          |
| P02452                                                                     | 2             | 4.7982           | K.GSPGADGPAGPPTGPGQGIAGQR.G      | 1            | CO1A1_HUMAN          |
| P02452                                                                     | 2             | 4.1196           | K.GESGPSGAGPTGAR.G               | 2            | CO1A1_HUMAN          |
| P02452                                                                     | 3             | 4.2392           | K.QGPSGASGERGPPGPM#GPPGLAGPPGES  | 1            | CO1A1_HUMAN          |
| P02452                                                                     | 2             | 5.9967           | K.SGDRGETGPAGPAGPVGPGAR.G        | 14           | CO1A1_HUMAN          |
| P02452                                                                     | 2             | 2.9419           | K.STGGISVPGPM#GPSGPR.G           | 3            | CO1A1_HUMAN          |
| <b><i>Collagen alpha-1(III) chain precursor - Homo sapiens (Human)</i></b> |               |                  |                                  |              |                      |
| P02461                                                                     | 2             | 4.145            | R.GPVGPSGPPGK.D                  | 9            | CO3A1_HUMAN          |
| P02461                                                                     | 2             | 2.7021           | R.GLPGPPGSNGNPGPPGPSGSPGK.D      | 1            | CO3A1_HUMAN          |
| <b><i>Collagen alpha-1(V) chain precursor - Homo sapiens (Human)</i></b>   |               |                  |                                  |              |                      |
| P20908                                                                     | 3             | 4.4907           | R.FGGGGDAGSKGPM#VSAQESQAQAILQQAR | 1            | CO5A1_HUMAN          |
| P20908                                                                     | 2             | 2.9511           | R.GPAGPM#GLTGR.P                 | 1            | CO5A1_HUMAN          |
| P20908                                                                     | 2             | 3.313            | R.GPAGPMGLTGR.P                  | 3            | CO5A1_HUMAN          |
| <b><i>Collagen alpha-1(VI) chain precursor - Homo sapiens (Human)</i></b>  |               |                  |                                  |              |                      |
| P12109                                                                     | 2             | 3.274            | R.GDPGEAGPQGDQGR.E               | 1            | CO6A1_HUMAN          |
| P12109                                                                     | 2             | 3.6111           | K.VFSVAITPDHLEPR.L               | 4            | CO6A1_HUMAN          |
| P12109                                                                     | 2             | 3.3965           | R.DAEEAISQTIDTIVDM#IK.N          | 1            | CO6A1_HUMAN          |
| <b><i>Collagen alpha-1(XII) chain precursor - Homo sapiens (Human)</i></b> |               |                  |                                  |              |                      |
| Q99715                                                                     | 3             | 4.0811           | K.MIATDPDDTHAYNVADFESLSR.I       | 1            | COCA1_HUMAN          |



| <i>Accession No*</i>                                                                                | <i>Charge</i> | <i>XC(Max)**</i> | <i>Peptide*</i>                 | <i>TC***</i> | <i>Reference No*</i> |
|-----------------------------------------------------------------------------------------------------|---------------|------------------|---------------------------------|--------------|----------------------|
| <b><i>Collagen alpha-1(XV) chain precursor [Contains: Endostatin - Homo sapiens (Human)]</i></b>    |               |                  |                                 |              |                      |
| P39059                                                                                              | 3             | 5.7784           | R.IILYYTEPGSHVSQEAAAFSVPVMTHR.W | 3            | COFA1_HUMAN          |
| P39059                                                                                              | 2             | 3.6721           | R.NLVTAFSNM#DDMLQK.A            | 2            | COFA1_HUMAN          |
| P39059                                                                                              | 2             | 4.5253           | R.TADTAVTGLASPLSTGK.I           | 2            | COFA1_HUMAN          |
| P39059                                                                                              | 2             | 5.3571           | R.GGVLFITDAFQK.V                | 5            | COFA1_HUMAN          |
| <b><i>Collagen alpha-1(XVI) chain precursor - Homo sapiens (Human)</i></b>                          |               |                  |                                 |              |                      |
| Q07092                                                                                              | 2             | 3.2113           | R.DGQQGQTGLR.G                  | 3            | COGA1_HUMAN          |
| Q07092                                                                                              | 2             | 4.7322           | R.DTQSNELIEINPQSEGK.V           | 1            | COGA1_HUMAN          |
| <b><i>Collagen alpha-1(XVIII) chain precursor [Contains: Endostatin] - Homo sapiens (Human)</i></b> |               |                  |                                 |              |                      |
| P39060                                                                                              | 3             | 4.893            | R.GTDNEVAALQPPVVQLHDSNPYPR.R    | 7            | COIA1_HUMAN          |
| P39060                                                                                              | 3             | 5.7042           | R.ELLREETGAALKPR.L              | 6            | COIA1_HUMAN          |
| <b><i>Collagen alpha-2(I) chain precursor - Homo sapiens (Human)</i></b>                            |               |                  |                                 |              |                      |
| P08123                                                                                              | 2             | 5.7675           | R.GEAGAAGPAGPAGPR.G             | 4            | CO1A2_HUMAN          |
| P08123                                                                                              | 2             | 3.1962           | R.PGPIGPAGAR.G                  | 1            | CO1A2_HUMAN          |
| P08123                                                                                              | 2             | 3.6499           | R.GPAGPSGPAGK.D                 | 17           | CO1A2_HUMAN          |
| P08123                                                                                              | 2             | 3.8671           | R.GPAGPSGPAGKDGR.T              | 5            | CO1A2_HUMAN          |
| P08123                                                                                              | 2             | 3.4978           | R.GPRGDQGPVGR.T                 | 1            | CO1A2_HUMAN          |
| P08123                                                                                              | 2             | 3.4847           | R.GPSGPQGIR.G                   | 13           | CO1A2_HUMAN          |
| P08123                                                                                              | 1             | 2.2591           | R.GVVGPPGAR.G                   | 1            | CO1A2_HUMAN          |
| P08123                                                                                              | 2             | 2.8503           | R.GASGPAGVR.G                   | 2            | CO1A2_HUMAN          |
| P08123                                                                                              | 2             | 2.8542           | R.GPSGPQGIRGDK.G                | 2            | CO1A2_HUMAN          |
| P08123                                                                                              | 1             | 2.2277           | R.AGVM#GPPGSR.G                 | 2            | CO1A2_HUMAN          |
| P08123                                                                                              | 3             | 4.7361           | K.NGDKGHAGLAGAR.G               | 15           | CO1A2_HUMAN          |
| P08123                                                                                              | 2             | 6.8429           | K.HGNRGETGPSGPVGPAGAVGPR.G      | 7            | CO1A2_HUMAN          |
| P08123                                                                                              | 2             | 3.83             | K.GVGLGPGPMGLMGPR.G             | 4            | CO1A2_HUMAN          |
| P08123                                                                                              | 2             | 3.7929           | K.GVGLGPGPM#GLMGPR.G            | 4            | CO1A2_HUMAN          |
| P08123                                                                                              | 2             | 3.3148           | K.GVGLGPGPM#GLM#GPR.G           | 4            | CO1A2_HUMAN          |
| P08123                                                                                              | 2             | 2.8097           | K.GHAGLAGAR.G                   | 3            | CO1A2_HUMAN          |
| P08123                                                                                              | 2             | 4.8346           | K.GEIGAVGNAGPAGPAGPR.G          | 4            | CO1A2_HUMAN          |
| P08123                                                                                              | 2             | 4.478            | R.GETGPSGPVGPAGAVGPR.G          | 5            | CO1A2_HUMAN          |
| <b><i>Collagen alpha-2(IV) chain precursor [Contains: Canstatin] - Homo sapiens (Human)</i></b>     |               |                  |                                 |              |                      |
| P08572                                                                                              | 2             | 3.5002           | R.SVSIGYLLVK.H                  | 3            | CO4A2_HUMAN          |
| P08572                                                                                              | 2             | 3.3353           | R.GLPGEVLGAQPGPR.G              | 3            | CO4A2_HUMAN          |
| P08572                                                                                              | 2             | 3.7264           | R.GLDGYQQPDGPR.G                | 6            | CO4A2_HUMAN          |
| P08572                                                                                              | 2             | 3.7859           | R.GEQGFMGNTGPTGAVGDR.G          | 2            | CO4A2_HUMAN          |

| <i>Accession No*</i>                                                                                     | <i>Charge</i> | <i>XC(Max)**</i> | <i>Peptide*</i>                   | <i>TC***</i> | <i>Reference No*</i> |
|----------------------------------------------------------------------------------------------------------|---------------|------------------|-----------------------------------|--------------|----------------------|
| P08572                                                                                                   | 2             | 3.2479           | K.IAVQPGTVGPQGR.R                 | 4            | CO4A2_HUMAN          |
| P08572                                                                                                   | 2             | 4.5456           | R.GEQGFM#GNTGPTGAVGDR.G           | 4            | CO4A2_HUMAN          |
| <b><i>Collagen alpha-2(V) chain precursor - Homo sapiens (Human)</i></b>                                 |               |                  |                                   |              |                      |
| P05997                                                                                                   | 2             | 3.7822           | K.SGLGSQVGLM#PGSVGPVGPGR.G        | 2            | CO5A2_HUMAN          |
| <b><i>Collagen alpha-2(VI) chain precursor - Homo sapiens (Human)</i></b>                                |               |                  |                                   |              |                      |
| P12110                                                                                                   | 2             | 3.2916           | R.LFAVAPNQNLK.E                   | 2            | CO6A2_HUMAN          |
| P12110                                                                                                   | 2             | 3.205            | R.DIASTPHELYR.N                   | 2            | CO6A2_HUMAN          |
| P12110                                                                                                   | 2             | 3.5703           | K.NLQGISSFR.R                     | 5            | CO6A2_HUMAN          |
| P12110                                                                                                   | 3             | 5.0019           | R.YGGLHFSDQVEVFSPPGSDR.A          | 2            | CO6A2_HUMAN          |
| <b><i>Collagen alpha-3(V) chain precursor - Homo sapiens (Human)</i></b>                                 |               |                  |                                   |              |                      |
| P25940                                                                                                   | 3             | 4.7255           | K.AAREDEEGDDSTM#GPDFR.A           | 3            | CO5A3_HUMAN          |
| P25940                                                                                                   | 2             | 3.667            | K.AAREDEEGDDSTMGPDFR.A            | 2            | CO5A3_HUMAN          |
| P25940                                                                                                   | 2             | 3.0625           | K.ALGVQGGQAGVPEGPGFCPQR.T         | 2            | CO5A3_HUMAN          |
| P25940                                                                                                   | 2             | 2.9516           | K.RGPSGHMGR.E                     | 4            | CO5A3_HUMAN          |
| P25940                                                                                                   | 2             | 4.081            | R.EDEEGDDSTM#GPDFR.A              | 4            | CO5A3_HUMAN          |
| <b><i>Collagen alpha-3(VI) chain precursor - Homo sapiens (Human)</i></b>                                |               |                  |                                   |              |                      |
| P12111                                                                                                   | 2             | 3.8407           | K.LSDAGITPLFLTR.Q                 | 1            | CO6A3_HUMAN          |
| P12111                                                                                                   | 2             | 4.147            | K.SVEDAQDVSLALTQR.G               | 1            | CO6A3_HUMAN          |
| P12111                                                                                                   | 2             | 2.9263           | K.IASNSATAFR.V                    | 1            | CO6A3_HUMAN          |
| P12111                                                                                                   | 2             | 3.0234           | R.GETGDDGRDGVGSEGR.R              | 1            | CO6A3_HUMAN          |
| <b><i>Collagen triple helix repeat-containing protein 1 precursor - Homo sapiens (Human)</i></b>         |               |                  |                                   |              |                      |
| Q96CG8                                                                                                   | 2             | 2.7081           | R.DGFKGEKGECLR.E                  | 1            | CTHR1_HUMAN          |
| <b><i>Complement C1q subcomponent subunit C precursor - Homo sapiens (Human)</i></b>                     |               |                  |                                   |              |                      |
| P02747                                                                                                   | 2             | 3.1032           | K.FQSVFTVTR.Q                     | 1            | C1QC_HUMAN           |
| <b><i>Complement C3 precursor [Contains: Complement C3 beta chain; Complement C3 alpha chain; C3</i></b> |               |                  |                                   |              |                      |
| P01024                                                                                                   | 2             | 4.4517           | R.IPIEDGSGEVVLSR.K                | 3            | CO3_HUMAN            |
| P01024                                                                                                   | 3             | 5.6196           | R.TKKQELSEAEQATR.T                | 2            | CO3_HUMAN            |
| P01024                                                                                                   | 1             | 2.1285           | R.SVQLTEK.R                       | 1            | CO3_HUMAN            |
| P01024                                                                                                   | 2             | 3.765            | R.ILLQGTPVAQMTEDAVDAER.L          | 1            | CO3_HUMAN            |
| P01024                                                                                                   | 3             | 6.159            | R.LESEETMVLEAHDAQGDVPVTVTVHDFPGK. | 2            | CO3_HUMAN            |
| P01024                                                                                                   | 2             | 4.7787           | R.VPVAVQGEDTVQSLTQGDGVAK.L        | 2            | CO3_HUMAN            |
| P01024                                                                                                   | 3             | 4.2685           | R.EGVQKEDIPPADLSDQVPDTESETR.I     | 3            | CO3_HUMAN            |
| P01024                                                                                                   | 3             | 4.0319           | K.VQLSNDFDEYIMAIEQTIK.S           | 3            | CO3_HUMAN            |
| P01024                                                                                                   | 3             | 5.2525           | K.VQLSNDFDEYIM#AIEQTIK.S          | 28           | CO3_HUMAN            |
| P01024                                                                                                   | 2             | 4.1901           | K.SGSDEVQVGGQR.T                  | 4            | CO3_HUMAN            |

| <i>Accession No*</i>                                                                                      | <i>Charge</i> | <i>XC(Max)**</i> | <i>Peptide*</i>                    | <i>TC***</i> | <i>Reference No*</i> |
|-----------------------------------------------------------------------------------------------------------|---------------|------------------|------------------------------------|--------------|----------------------|
| P01024                                                                                                    | 2             | 4.2141           | K.QLYNVEATSYALLALLQLK.D            | 1            | CO3_HUMAN            |
| P01024                                                                                                    | 2             | 3.0486           | K.KLVLSSEK.T                       | 1            | CO3_HUMAN            |
| P01024                                                                                                    | 1             | 2.3818           | R.QNQLK.V                          | 1            | CO3_HUMAN            |
| P01024                                                                                                    | 2             | 3.056            | R.EPGQDLVVLPLSITTFIPFR.L           | 2            | CO3_HUMAN            |
| <b><i>Complement component 1 Q subcomponent-binding protein, mitochondrial precursor - Homo sapie</i></b> |               |                  |                                    |              |                      |
| Q07021                                                                                                    | 2             | 4.9411           | K.M#SGGWELELNTEAK.L                | 4            | C1QBP_HUMAN          |
| Q07021                                                                                                    | 2             | 5.1507           | K.MSGGWELELNTEAK.L                 | 7            | C1QBP_HUMAN          |
| Q07021                                                                                                    | 3             | 5.4927           | K.ALVLDCHYPEDEVGQEDEAESDIFSIR.E    | 4            | C1QBP_HUMAN          |
| Q07021                                                                                                    | 2             | 3.3815           | K.AFVDFLSDEIKEER.K                 | 2            | C1QBP_HUMAN          |
| <b><i>Complement factor H precursor - Homo sapiens (Human)</i></b>                                        |               |                  |                                    |              |                      |
| P08603                                                                                                    | 2             | 2.8156           | K.SCDIPVFMNAR.T                    | 1            | CFAH_HUMAN           |
| P08603                                                                                                    | 2             | 3.8114           | K.SSNLIIEHLK.N                     | 2            | CFAH_HUMAN           |
| P08603                                                                                                    | 3             | 5.2904           | R.DTSCVNPPTVQNAYIVSR.Q             | 2            | CFAH_HUMAN           |
| P08603                                                                                                    | 2             | 3.3292           | R.SSQESYAHGTK.L                    | 7            | CFAH_HUMAN           |
| P08603                                                                                                    | 2             | 2.7915           | R.TKNDFTWFK.L                      | 1            | CFAH_HUMAN           |
| P08603                                                                                                    | 2             | 3.8566           | K.EQVQSCGPPPELLNGNVK.E             | 1            | CFAH_HUMAN           |
| <b><i>Condensin complex subunit 3 - Homo sapiens (Human)</i></b>                                          |               |                  |                                    |              |                      |
| Q9BPX3                                                                                                    | 2             | 4.4529           | K.SKLNLAQFLNEDLS.-                 | 2            | CND3_HUMAN           |
| <b><i>Condensin-II complex subunit G2 - Homo sapiens (Human)</i></b>                                      |               |                  |                                    |              |                      |
| Q86XI2                                                                                                    | 2             | 2.7305           | K.EDTGKTAFVM#LLR.R                 | 1            | CNDG2_HUMAN          |
| <b><i>Conserved nuclear protein NHN1 - Homo sapiens (Human)</i></b>                                       |               |                  |                                    |              |                      |
| Q86VM9                                                                                                    | 2             | 2.7797           | R.DSSTQPPK.S                       | 1            | Q86VM9_HUMA          |
| Q86VM9                                                                                                    | 2             | 2.8258           | K.AVEDAIAR.K                       | 1            | Q86VM9_HUMA          |
| <b><i>COP9 signalosome complex subunit 3 - Homo sapiens (Human)</i></b>                                   |               |                  |                                    |              |                      |
| Q9UNS2                                                                                                    | 2             | 3.2618           | K.SMGSEQEDDSGNKPSSYS.-             | 2            | CSN3_HUMAN           |
| Q9UNS2                                                                                                    | 2             | 3.8375           | K.SM#GSQEDDSGNKPSSYS.-             | 3            | CSN3_HUMAN           |
| <b><i>COP9 signalosome complex subunit 4 - Homo sapiens (Human)</i></b>                                   |               |                  |                                    |              |                      |
| Q9BT78                                                                                                    | 2             | 2.9634           | K.LYNNITFEELGALLEIPAAK.A           | 1            | CSN4_HUMAN           |
| <b><i>Copper chaperone for superoxide dismutase - Homo sapiens (Human)</i></b>                            |               |                  |                                    |              |                      |
| O14618                                                                                                    | 2             | 3.6314           | R.SLIIDEGEDDLGRGGHPLSK.I           | 1            | CCS_HUMAN            |
| O14618                                                                                                    | 3             | 4.0438           | K.GM#GSGQLQNLGA AVAILGGPGTVQGVVR.F | 1            | CCS_HUMAN            |
| O14618                                                                                                    | 2             | 2.8578           | R.FLQLTPER.C                       | 1            | CCS_HUMAN            |
| O14618                                                                                                    | 2             | 4.6663           | R.MEDEQLKVDVIGR.S                  | 3            | CCS_HUMAN            |
| O14618                                                                                                    | 2             | 3.0239           | R.SAGLFQNP.K                       | 1            | CCS_HUMAN            |
| <b><i>Copper transport protein ATOX1 - Homo sapiens (Human)</i></b>                                       |               |                  |                                    |              |                      |

| <i>Accession No*</i>                                            | <i>Charge</i> | <i>XC(Max)**</i> | <i>Peptide*</i>                   | <i>TC***</i> | <i>Reference No*</i> |
|-----------------------------------------------------------------|---------------|------------------|-----------------------------------|--------------|----------------------|
| O00244                                                          | 3             | 4.3084           | K.LGGVKYDIDLPNKK.V                | 3            | ATOX1_HUMAN          |
| O00244                                                          | 2             | 2.7502           | K.YDIDLPNKK.V                     | 2            | ATOX1_HUMAN          |
| O00244                                                          | 2             | 3.6366           | K.TGKTVSYLGLE.-                   | 4            | ATOX1_HUMAN          |
| <b><i>Cordon-bleu protein-like 1 - Homo sapiens (Human)</i></b> |               |                  |                                   |              |                      |
| Q53SF7                                                          | 2             | 3.5811           | R.QSSLTFQSSDPEQMR.Q               | 2            | COBL1_HUMAN          |
| Q53SF7                                                          | 2             | 3.6638           | R.DQTASAPATPLVNK.H                | 4            | COBL1_HUMAN          |
| Q53SF7                                                          | 3             | 5.2399           | R.ASNAQAKPSSFFLQMQR.R             | 2            | COBL1_HUMAN          |
| Q53SF7                                                          | 3             | 4.7547           | R.DTGTAPFAPNLEEINNILESK.F         | 1            | COBL1_HUMAN          |
| Q53SF7                                                          | 2             | 3.8654           | R.LSHSM#SPDAQDGH.-                | 3            | COBL1_HUMAN          |
| Q53SF7                                                          | 2             | 4.7735           | R.SNTISKPYISNTLPSDAPK.K           | 2            | COBL1_HUMAN          |
| Q53SF7                                                          | 3             | 4.0702           | R.SRLSHSM#SPDAQDGH.-              | 1            | COBL1_HUMAN          |
| Q53SF7                                                          | 3             | 3.9811           | R.TEHQVPSSVSSPDDAMVSPLKPAPK.M     | 1            | COBL1_HUMAN          |
| Q53SF7                                                          | 2             | 3.7056           | R.VSGHYVTSAAAK.S                  | 2            | COBL1_HUMAN          |
| Q53SF7                                                          | 2             | 5.1797           | R.AGSLQLSSMSAGNSSLR.R             | 3            | COBL1_HUMAN          |
| Q53SF7                                                          | 2             | 2.9501           | R.VTIPSNITISVNGR.S                | 1            | COBL1_HUMAN          |
| Q53SF7                                                          | 3             | 3.7255           | K.ETAIQTEDSAISESPEEPLPNLKPKNLR.T  | 1            | COBL1_HUMAN          |
| Q53SF7                                                          | 2             | 2.9577           | R.AGSLQLSSM#SAGNSSLR.R            | 1            | COBL1_HUMAN          |
| Q53SF7                                                          | 3             | 4.0334           | K.EAERDMLPSPEQTLSPLSK.M           | 1            | COBL1_HUMAN          |
| Q53SF7                                                          | 2             | 3.0041           | K.IPPHQSDENSR.V                   | 3            | COBL1_HUMAN          |
| Q53SF7                                                          | 2             | 3.2285           | K.KTEINVEGVAK.N                   | 2            | COBL1_HUMAN          |
| Q53SF7                                                          | 2             | 2.9121           | K.LNQPSAEK.T                      | 2            | COBL1_HUMAN          |
| Q53SF7                                                          | 1             | 2.1196           | K.NSTASYLK.N                      | 1            | COBL1_HUMAN          |
| Q53SF7                                                          | 1             | 2.2652           | K.NYPLYR.Q                        | 2            | COBL1_HUMAN          |
| Q53SF7                                                          | 2             | 3.605            | K.PSSFFLQMQR.R                    | 2            | COBL1_HUMAN          |
| Q53SF7                                                          | 2             | 3.7445           | K.RVSGHYVTSAAAK.S                 | 2            | COBL1_HUMAN          |
| Q53SF7                                                          | 3             | 3.8346           | K.SM#SVDETDKSPCEAGR.V             | 1            | COBL1_HUMAN          |
| Q53SF7                                                          | 3             | 3.7001           | K.ELTNKEAERDMLPSPEQTLSPLSK.M      | 1            | COBL1_HUMAN          |
| <b><i>Core histone macro-H2A.1 - Homo sapiens (Human)</i></b>   |               |                  |                                   |              |                      |
| O75367                                                          | 2             | 3.726            | K.AASADSTTEGTPADGFTVLSTK.S        | 1            | H2AY_HUMAN           |
| <b><i>Coronin-1A - Homo sapiens (Human)</i></b>                 |               |                  |                                   |              |                      |
| P31146                                                          | 2             | 3.341            | R.AAPEASGTPSSDAVSR.L              | 1            | COR1A_HUMAN          |
| P31146                                                          | 2             | 3.163            | R.DAGPLLLSLK.D                    | 2            | COR1A_HUMAN          |
| P31146                                                          | 2             | 3.9307           | R.KLQATVQELQK.R                   | 2            | COR1A_HUMAN          |
| P31146                                                          | 3             | 4.0193           | R.KSDLFQEDLYPPTAGPDPALTAEEWLGGR.D | 1            | COR1A_HUMAN          |
| <b><i>Coronin-1B - Homo sapiens (Human)</i></b>                 |               |                  |                                   |              |                      |

| <i>Accession No*</i>                                                            | <i>Charge</i> | <i>XC(Max)**</i> | <i>Peptide*</i>                   | <i>TC***</i> | <i>Reference No*</i> |
|---------------------------------------------------------------------------------|---------------|------------------|-----------------------------------|--------------|----------------------|
| Q9BR76                                                                          | 2             | 5.6276           | R.AGEAGKLEEVMQELR.A               | 5            | COR1B_HUMAN          |
| Q9BR76                                                                          | 3             | 3.7683           | R.KSDLFQDDLYPDTAGPEAALEAEVWVSGR.D | 1            | COR1B_HUMAN          |
| <b><i>Coronin-1C - Homo sapiens (Human)</i></b>                                 |               |                  |                                   |              |                      |
| Q9ULV4                                                                          | 2             | 4.6324           | K.KTTDTASVQNEAK.L                 | 2            | COR1C_HUMAN          |
| Q9ULV4                                                                          | 2             | 3.2934           | R.ISKLEQQMAK.I                    | 1            | COR1C_HUMAN          |
| Q9ULV4                                                                          | 2             | 3.0091           | R.ISKLEQQM#AK.I                   | 1            | COR1C_HUMAN          |
| <b><i>Cortactin-binding protein 2 - Homo sapiens (Human)</i></b>                |               |                  |                                   |              |                      |
| Q8WZ74                                                                          | 2             | 3.6144           | K.TVASTPSSLPQGNR.V                | 3            | CTTB2_HUMAN          |
| <b><i>Craniofacial development protein 1 - Homo sapiens (Human)</i></b>         |               |                  |                                   |              |                      |
| Q9UEE9                                                                          | 2             | 3.9874           | K.VDFDAGEEVR.V                    | 4            | CFDP1_HUMAN          |
| Q9UEE9                                                                          | 2             | 3.4243           | R.SSGMSSLLGK.I                    | 1            | CFDP1_HUMAN          |
| Q9UEE9                                                                          | 2             | 3.1549           | R.KAQSIAPAR.K                     | 2            | CFDP1_HUMAN          |
| Q9UEE9                                                                          | 4             | 5.4889           | K.SKLDWESFKEEEGIGEELAIHNR.G       | 1            | CFDP1_HUMAN          |
| Q9UEE9                                                                          | 3             | 5.741            | K.KKEDELWASFLNDVGP.K.S            | 5            | CFDP1_HUMAN          |
| Q9UEE9                                                                          | 2             | 2.7864           | K.EVDATSKEAK.S                    | 1            | CFDP1_HUMAN          |
| Q9UEE9                                                                          | 2             | 4.8471           | K.EKPQANVPSALPSLPAGSGLK.R         | 3            | CFDP1_HUMAN          |
| Q9UEE9                                                                          | 2             | 3.0791           | K.EDEVDGEEQTQK.T                  | 2            | CFDP1_HUMAN          |
| Q9UEE9                                                                          | 2             | 4.0014           | K.AEELEKPKETEK.V                  | 2            | CFDP1_HUMAN          |
| Q9UEE9                                                                          | 2             | 2.7283           | R.SSGM#SLLGK.I                    | 1            | CFDP1_HUMAN          |
| <b><i>CREB-regulated transcription coactivator 3 - Homo sapiens (Human)</i></b> |               |                  |                                   |              |                      |
| Q6UUV7                                                                          | 2             | 3.0237           | R.AFEQLMTDLTLRSR.V                | 1            | Q6UUV7_HUMA          |
| <b><i>Crk-like protein - Homo sapiens (Human)</i></b>                           |               |                  |                                   |              |                      |
| P46109                                                                          | 2             | 2.9956           | R.DSSTCPGDYVLSVSENSR.V            | 1            | CRKL_HUMAN           |
| P46109                                                                          | 2             | 2.7602           | R.VGMIPVPYVEK.L                   | 1            | CRKL_HUMAN           |
| P46109                                                                          | 2             | 2.7685           | R.SAWYMGVPSR.Q                    | 1            | CRKL_HUMAN           |
| P46109                                                                          | 2             | 4.8791           | R.MNINGQWEGEVNGR.K                | 2            | CRKL_HUMAN           |
| P46109                                                                          | 2             | 3.2083           | R.M#NINGQWEGEVNGR.K               | 1            | CRKL_HUMAN           |
| P46109                                                                          | 3             | 4.1998           | R.KGLFPFTHVK.I                    | 2            | CRKL_HUMAN           |
| P46109                                                                          | 2             | 2.8188           | R.HGMFLVR.D                       | 2            | CRKL_HUMAN           |
| P46109                                                                          | 2             | 4.8338           | K.TALALEVGDIVK.V                  | 3            | CRKL_HUMAN           |
| P46109                                                                          | 2             | 4.2672           | K.IHYLDTTTLIEPAPR.Y               | 2            | CRKL_HUMAN           |
| P46109                                                                          | 3             | 3.7147           | K.IGDQEFDHLPALLEFYK.I             | 1            | CRKL_HUMAN           |
| P46109                                                                          | 3             | 4.1515           | R.FKIGDQEFDHLPALLEFYK.I           | 1            | CRKL_HUMAN           |
| <b><i>CRSP complex subunit 7 - Homo sapiens (Human)</i></b>                     |               |                  |                                   |              |                      |
| O95402                                                                          | 3             | 3.8907           | K.ASVLQQLDRVDETPGPPHPK.G          | 1            | CRSP7_HUMAN          |

| <i>Accession No*</i>                                                                   | <i>Charge</i> | <i>XC(Max)**</i> | <i>Peptide*</i>                   | <i>TC***</i> | <i>Reference No*</i> |
|----------------------------------------------------------------------------------------|---------------|------------------|-----------------------------------|--------------|----------------------|
| O95402                                                                                 | 3             | 4.2847           | K.GSVSPSPSRPQALDATQVPSPLPLAQPSTPP | 1            | CRSP7_HUMAN          |
| <b><i>CTD small phosphatase-like protein 2 - Homo sapiens (Human)</i></b>              |               |                  |                                   |              |                      |
| Q3ZTU1                                                                                 | 3             | 4.4707           | R.KASQQSNQIQTR.T                  | 2            | Q3ZTU1_HUMA          |
| <b><i>CTTNBP2 N-terminal-like protein - Homo sapiens (Human)</i></b>                   |               |                  |                                   |              |                      |
| Q9P2B4                                                                                 | 2             | 3.874            | R.DLSPTLIDNSAAK.Q                 | 7            | CT2NL_HUMAN          |
| Q9P2B4                                                                                 | 2             | 3.3189           | R.NLANTANPR.G                     | 3            | CT2NL_HUMAN          |
| Q9P2B4                                                                                 | 3             | 5.9833           | R.FTSQQGPIKPVSPNSSPFGTDYR.N       | 4            | CT2NL_HUMAN          |
| Q9P2B4                                                                                 | 2             | 3.1523           | R.GDTSHSPTPGK.V                   | 5            | CT2NL_HUMAN          |
| <b><i>C-type lectin domain family 14 member A precursor - Homo sapiens (Human)</i></b> |               |                  |                                   |              |                      |
| Q86T13                                                                                 | 2             | 3.4926           | R.DRAEGALLAESPLGSSDA.-            | 1            | CLC14_HUMAN          |
| <b><i>Cubilin precursor - Homo sapiens (Human)</i></b>                                 |               |                  |                                   |              |                      |
| O60494                                                                                 | 2             | 3.3958           | R.FVTDGSVTASGFR.L                 | 2            | CUBN_HUMAN           |
| O60494                                                                                 | 1             | 2.1772           | R.SSGDSMFIK.L                     | 1            | CUBN_HUMAN           |
| O60494                                                                                 | 2             | 3.4843           | R.SPFFPNVYPGER.T                  | 4            | CUBN_HUMAN           |
| O60494                                                                                 | 2             | 3.9436           | R.SPENPMQVSSTGNELAIR.F            | 2            | CUBN_HUMAN           |
| O60494                                                                                 | 2             | 3.3786           | R.VGDADGPLMWR.L                   | 2            | CUBN_HUMAN           |
| O60494                                                                                 | 2             | 3.1043           | K.YDDCEGGSVAR.C                   | 1            | CUBN_HUMAN           |
| O60494                                                                                 | 2             | 3.2484           | K.SSSTENHGFMAK.F                  | 1            | CUBN_HUMAN           |
| O60494                                                                                 | 2             | 2.7678           | K.SITNSVWIR.F                     | 1            | CUBN_HUMAN           |
| O60494                                                                                 | 2             | 2.9857           | K.LRTDEGQQGR.G                    | 2            | CUBN_HUMAN           |
| O60494                                                                                 | 2             | 3.3132           | R.ITLMFNLR.L                      | 1            | CUBN_HUMAN           |
| O60494                                                                                 | 3             | 4.0843           | R.KFQGLQQTVDKK.V                  | 3            | CUBN_HUMAN           |
| <b><i>Cullin-4A - Homo sapiens (Human)</i></b>                                         |               |                  |                                   |              |                      |
| Q13619                                                                                 | 2             | 3.1022           | R.KGSFSALVGR.T                    | 2            | CUL4A_HUMAN          |
| <b><i>Cullin-5 - Homo sapiens (Human)</i></b>                                          |               |                  |                                   |              |                      |
| Q93034                                                                                 | 2             | 2.8267           | K.SNVEDSIVR.K                     | 2            | CUL5_HUMAN           |
| <b><i>Cyclin-dependent kinase 6 inhibitor - Homo sapiens (Human)</i></b>               |               |                  |                                   |              |                      |
| P42773                                                                                 | 2             | 3.1079           | R.VVEFLVK.H                       | 2            | CDN2C_HUMAN          |
| <b><i>Cyclin-dependent kinase inhibitor 1B - Homo sapiens (Human)</i></b>              |               |                  |                                   |              |                      |
| P46527                                                                                 | 2             | 4.2299           | R.TEENVSDGSPNAGSVEQTPK.K          | 2            | CDN1B_HUMAN          |
| P46527                                                                                 | 2             | 3.516            | R.NLFGPVDHEELTR.D                 | 2            | CDN1B_HUMAN          |
| P46527                                                                                 | 3             | 5.3426           | R.ANRTEENVSDGSPNAGSVEQTPK.K       | 7            | CDN1B_HUMAN          |
| P46527                                                                                 | 2             | 3.0187           | R.DMEEASQR.K                      | 1            | CDN1B_HUMAN          |
| <b><i>Cyclin-dependent kinase-like 5 - Homo sapiens (Human)</i></b>                    |               |                  |                                   |              |                      |
| O76039                                                                                 | 2             | 3.7275           | K.TYQASSQPGSTSK.D                 | 3            | CDKL5_HUMAN          |

| <i>Accession No*</i>                                                     | <i>Charge</i> | <i>XC(Max)**</i> | <i>Peptide*</i>                    | <i>TC***</i> | <i>Reference No*</i> |
|--------------------------------------------------------------------------|---------------|------------------|------------------------------------|--------------|----------------------|
| <b><i>Cyclin-T1 - Homo sapiens (Human)</i></b>                           |               |                  |                                    |              |                      |
| O60563                                                                   | 3             | 3.8108           | K.HAEELAAQKR.Q                     | 1            | CCNT1_HUMAN          |
| O60563                                                                   | 2             | 2.8281           | K.HNSVEDSVTK.S                     | 2            | CCNT1_HUMAN          |
| O60563                                                                   | 3             | 4.5536           | K.HSSQTSNLAHK.T                    | 2            | CCNT1_HUMAN          |
| <b><i>Cyclin-T2 - Homo sapiens (Human)</i></b>                           |               |                  |                                    |              |                      |
| O60583                                                                   | 2             | 3.6774           | R.SPVGLSSDGISSSSSSSR.K             | 1            | CCNT2_HUMAN          |
| <b><i>Cystatin-B - Homo sapiens (Human)</i></b>                          |               |                  |                                    |              |                      |
| P04080                                                                   | 2             | 3.3679           | K.AKHDELTYF.-                      | 3            | CYTB_HUMAN           |
| P04080                                                                   | 3             | 3.9867           | R.VFQSLPHENKPLTLSNYQTNK.A          | 2            | CYTB_HUMAN           |
| P04080                                                                   | 2             | 4.4867           | K.SQVVAGTNYFIK.V                   | 5            | CYTB_HUMAN           |
| <b><i>Cysteine and glycine-rich protein 1 - Homo sapiens (Human)</i></b> |               |                  |                                    |              |                      |
| P21291                                                                   | 2             | 4.691            | K.GFGFGQGAGALVHSE.-                | 14           | CSRP1_HUMAN          |
| P21291                                                                   | 2             | 4.1884           | K.GLESTTLADKDGIEYCK.G              | 1            | CSRP1_HUMAN          |
| <b><i>Cysteine and glycine-rich protein 2 - Homo sapiens (Human)</i></b> |               |                  |                                    |              |                      |
| Q16527                                                                   | 2             | 5.2824           | K.GFGYGQGAGALVHAQ.-                | 8            | CSRP2_HUMAN          |
| Q16527                                                                   | 2             | 4.1435           | K.GYGYGQGAGTLNMDR.G                | 1            | CSRP2_HUMAN          |
| Q16527                                                                   | 2             | 3.8468           | K.SLESTTLTEKEGEIYCK.G              | 2            | CSRP2_HUMAN          |
| <b><i>Cysteine-rich PDZ-binding protein. - Homo sapiens (Human)</i></b>  |               |                  |                                    |              |                      |
| Q9P021                                                                   | 2             | 4.5695           | K.KLGTVITPDTWK.D                   | 2            | Q9P021_HUMAN         |
| <b><i>Cysteine-rich protein 1 - Homo sapiens (Human)</i></b>             |               |                  |                                    |              |                      |
| P50238                                                                   | 2             | 3.4738           | R.GGAESHTFK.-                      | 16           | CRIP1_HUMAN          |
| P50238                                                                   | 1             | 2.1049           | K.EVYFAER.V                        | 1            | CRIP1_HUMAN          |
| P50238                                                                   | 3             | 5.058            | K.TLTSGGHAHEHGKPYCNHPCYAAMFGPK.G   | 1            | CRIP1_HUMAN          |
| <b><i>Cysteine-rich protein 2 - Homo sapiens (Human)</i></b>             |               |                  |                                    |              |                      |
| P52943                                                                   | 2             | 5.1918           | K.PLAEGPQVTGPIEVPAAR.A             | 4            | CRIP2_HUMAN          |
| P52943                                                                   | 2             | 3.2102           | R.KASGPPKGPSR.A                    | 6            | CRIP2_HUMAN          |
| P52943                                                                   | 1             | 2.201            | K.TVYFAEK.V                        | 3            | CRIP2_HUMAN          |
| P52943                                                                   | 1             | 2.2656           | K.VYFAEK.V                         | 2            | CRIP2_HUMAN          |
| P52943                                                                   | 3             | 4.0408           | K.TLTPGGHAHEDGQPYCHKPCYGILFGPK.G   | 1            | CRIP2_HUMAN          |
| P52943                                                                   | 3             | 3.7871           | K.GVNTGAVGSYIYDRDPEGKVQP.-         | 4            | CRIP2_HUMAN          |
| P52943                                                                   | 3             | 6.9563           | K.GVNIGGAGSYIYEKPLAEGPQVTGPIEVPAAR | 3            | CRIP2_HUMAN          |
| P52943                                                                   | 2             | 3.7969           | K.GVNIGGAGSYIYEK.P                 | 1            | CRIP2_HUMAN          |
| P52943                                                                   | 2             | 2.9465           | K.ASGPPKGPSR.A                     | 1            | CRIP2_HUMAN          |
| P52943                                                                   | 2             | 2.7212           | K.KVYFAEK.V                        | 1            | CRIP2_HUMAN          |
| P52943                                                                   | 2             | 5.1114           | R.ASSVTTFTGEPNTCPR.C               | 13           | CRIP2_HUMAN          |

| <i>Accession No*</i>                                                                          | <i>Charge</i> | <i>XC(Max)**</i> | <i>Peptide*</i>                   | <i>TC***</i> | <i>Reference No*</i> |
|-----------------------------------------------------------------------------------------------|---------------|------------------|-----------------------------------|--------------|----------------------|
| <b><i>Cysteine-rich with EGF-like domain protein 2 precursor - Homo sapiens (Human)</i></b>   |               |                  |                                   |              |                      |
| Q6UXH1                                                                                        | 2             | 3.1604           | K.TLSKYESSEIR.L                   | 2            | CREL2_HUMAN          |
| Q6UXH1                                                                                        | 3             | 3.9296           | R.GLVDKFNQGMVDTAKK.N              | 1            | CREL2_HUMAN          |
| <b><i>Cystin-1 - Homo sapiens (Human)</i></b>                                                 |               |                  |                                   |              |                      |
| Q717R9                                                                                        | 2             | 3.6687           | R.SPESLPAGPGAAALEGGTR.R           | 2            | CYS1_HUMAN           |
| <b><i>Cytochrome b-245 heavy chain - Homo sapiens (Human)</i></b>                             |               |                  |                                   |              |                      |
| P04839                                                                                        | 2             | 3.2618           | K.TIASQHPNTR.I                    | 2            | CY24B_HUMAN          |
| <b><i>Cytochrome b-245 light chain - Homo sapiens (Human)</i></b>                             |               |                  |                                   |              |                      |
| P13498                                                                                        | 3             | 4.2631           | R.KKPSEEEAAAAGPPGGPQVNIPIVTDEVV   | 1            | CY24A_HUMAN          |
| <b><i>Cytochrome b5 - Homo sapiens (Human)</i></b>                                            |               |                  |                                   |              |                      |
| P00167                                                                                        | 3             | 3.9066           | R.EQAGGDATENFEDVGHSTDAR.E         | 1            | CYB5_HUMAN           |
| P00167                                                                                        | 2             | 2.8748           | K.YYTL EEIQK.H                    | 1            | CYB5_HUMAN           |
| P00167                                                                                        | 2             | 4.3466           | K.TFIIGELHPDDRPK.L                | 2            | CYB5_HUMAN           |
| P00167                                                                                        | 2             | 3.7594           | K.FLEEHPGGEEVLR.E                 | 2            | CYB5_HUMAN           |
| P00167                                                                                        | 4             | 5.1622           | K.FLEEHPGGEEVLR EQAGGDATENFEDVGHS | 2            | CYB5_HUMAN           |
| <b><i>Cytochrome c - Homo sapiens (Human)</i></b>                                             |               |                  |                                   |              |                      |
| P99999                                                                                        | 2             | 3.699            | K.TGQAPGYSYTAANK.N                | 2            | CYC_HUMAN            |
| P99999                                                                                        | 3             | 5.5876           | R.KTGQAPGYSYTAANKNK.G             | 1            | CYC_HUMAN            |
| <b><i>Cytochrome c oxidase assembly protein COX19 - Homo sapiens (Human)</i></b>              |               |                  |                                   |              |                      |
| Q49B96                                                                                        | 2             | 3.6201           | K.LGFGDLTSGK.S                    | 2            | COX19_HUMAN          |
| Q49B96                                                                                        | 2             | 2.9706           | R.KLMLQEPLK.L                     | 1            | COX19_HUMAN          |
| <b><i>Cytochrome c oxidase subunit 5A, mitochondrial precursor - Homo sapiens (Human)</i></b> |               |                  |                                   |              |                      |
| P20674                                                                                        | 1             | 2.1392           | K.IIDAALR.A                       | 1            | COX5A_HUMAN          |
| P20674                                                                                        | 3             | 4.1284           | R.WVTFYFNKPDIDAWELRK.G            | 1            | COX5A_HUMAN          |
| P20674                                                                                        | 2             | 2.8853           | R.ILEVVKDK.A                      | 1            | COX5A_HUMAN          |
| P20674                                                                                        | 2             | 4.023            | K.GINTLVTYDM#VPEPK.I              | 3            | COX5A_HUMAN          |
| P20674                                                                                        | 3             | 3.7739           | R.KGINTLVTYDMVPEPK.I              | 2            | COX5A_HUMAN          |
| P20674                                                                                        | 2             | 3.0035           | K.GINTLVTYDMVPEPK.I               | 1            | COX5A_HUMAN          |
| <b><i>Cytochrome c oxidase subunit 5B, mitochondrial precursor - Homo sapiens (Human)</i></b> |               |                  |                                   |              |                      |
| P10606                                                                                        | 2             | 3.5209           | K.GLDPYNVLAPK.G                   | 4            | COX5B_HUMAN          |
| P10606                                                                                        | 2             | 4.1731           | K.KGLDPYNVLAPK.G                  | 5            | COX5B_HUMAN          |
| P10606                                                                                        | 1             | 2.1851           | R.EIMLAAK.K                       | 1            | COX5B_HUMAN          |
| <b><i>Cytochrome c oxidase subunit VIb isoform 1 - Homo sapiens (Human)</i></b>               |               |                  |                                   |              |                      |
| P14854                                                                                        | 2             | 2.8786           | K.GGDISVCEWYQR.V                  | 1            | CX6B1_HUMAN          |
| P14854                                                                                        | 2             | 2.9009           | K.TAPFDSRFPNQTR.N                 | 1            | CX6B1_HUMAN          |



| <i>Accession No*</i>                                                                 | <i>Charge</i> | <i>XC(Max)**</i> | <i>Peptide*</i>                 | <i>TC***</i> | <i>Reference No*</i> |
|--------------------------------------------------------------------------------------|---------------|------------------|---------------------------------|--------------|----------------------|
| <b><i>Cytochrome P450 19A1 - Homo sapiens (Human)</i></b>                            |               |                  |                                 |              |                      |
| P11511                                                                               | 2             | 3.0226           | K.NMLEM#IFTPRNSDR.C             | 1            | CP19A_HUMAN          |
| <b><i>Cytoplasmic dynein 1 intermediate chain 2 - Homo sapiens (Human)</i></b>       |               |                  |                                 |              |                      |
| Q13409                                                                               | 2             | 2.7434           | K.SELKAELER.K                   | 1            | DC1I2_HUMAN          |
| Q13409                                                                               | 2             | 4.07             | K.SVSTPSEAGSQDSDGAVGSR.T        | 3            | DC1I2_HUMAN          |
| Q13409                                                                               | 2             | 3.397            | K.EAVAPVQEEEDLEK.K              | 2            | DC1I2_HUMAN          |
| Q13409                                                                               | 2             | 3.7499           | R.TLAEINANRADAEEEAATRIPA.-      | 1            | DC1I2_HUMAN          |
| <b><i>Cytoplasmic dynein 1 light intermediate chain 1 - Homo sapiens (Human)</i></b> |               |                  |                                 |              |                      |
| Q9Y6G9                                                                               | 2             | 5.0295           | K.AGATSEGVLANFFNSLLSK.K         | 7            | DC1L1_HUMAN          |
| Q9Y6G9                                                                               | 3             | 4.7349           | K.KTGSPGGPGVSGGSPAGGAGGGSSGLPPS | 2            | DC1L1_HUMAN          |
| Q9Y6G9                                                                               | 3             | 6.7694           | K.KTGSPGGPGVSGGSPAGGAGGGSSGLPPS | 2            | DC1L1_HUMAN          |
| Q9Y6G9                                                                               | 2             | 4.6013           | R.KPVTVSPTTPTSPTEGEAS.-         | 5            | DC1L1_HUMAN          |
| Q9Y6G9                                                                               | 2             | 4.0381           | R.SVSSNVASVSPIPAGSK.K           | 1            | DC1L1_HUMAN          |
| <b><i>Cytoplasmic dynein 1 light intermediate chain 2 - Homo sapiens (Human)</i></b> |               |                  |                                 |              |                      |
| O43237                                                                               | 3             | 5.0785           | K.KPDPNIKNNAASEGVLASFFNSLLSK.K  | 1            | DC1L2_HUMAN          |
| O43237                                                                               | 2             | 4.2451           | K.TVLSNVQEELDR.M                | 7            | DC1L2_HUMAN          |
| O43237                                                                               | 2             | 4.039            | R.KPDSM#VTSNSTENEA.-            | 3            | DC1L2_HUMAN          |
| O43237                                                                               | 2             | 4.2765           | R.KPDSMVTNSSTENEA.-             | 5            | DC1L2_HUMAN          |
| O43237                                                                               | 2             | 3.3693           | R.GGPASVPSSSPGTSVK.K            | 1            | DC1L2_HUMAN          |
| O43237                                                                               | 2             | 3.9653           | K.TGSPGSPGAGGVQSTAK.K           | 2            | DC1L2_HUMAN          |
| O43237                                                                               | 3             | 5.4091           | K.NNAASEGVLASFFNSLLSK.K         | 1            | DC1L2_HUMAN          |
| O43237                                                                               | 2             | 5.3082           | K.KTGSPGSPGAGGVQSTAK.K          | 12           | DC1L2_HUMAN          |
| O43237                                                                               | 3             | 4.9858           | K.KTGSPGSPGAGGVQSTAKK.S         | 3            | DC1L2_HUMAN          |
| O43237                                                                               | 2             | 3.2283           | K.TGSPGSPGAGGVQSTAKK.S          | 1            | DC1L2_HUMAN          |
| <b><i>Cytoplasmic protein NCK2 - Homo sapiens (Human)</i></b>                        |               |                  |                                 |              |                      |
| O43639                                                                               | 2             | 3.2896           | R.IYDLNIPAFVK.F                 | 2            | NCK2_HUMAN           |
| O43639                                                                               | 2             | 2.9031           | K.GSLVKNLKDTLGLGK.T             | 2            | NCK2_HUMAN           |
| O43639                                                                               | 2             | 2.7687           | R.DASPTPSTDAEYPANGSGADR.I       | 1            | NCK2_HUMAN           |
| <b><i>Cytoskeleton-associated protein 4 - Homo sapiens (Human)</i></b>               |               |                  |                                 |              |                      |
| Q07065                                                                               | 2             | 5.0126           | K.GAHPSSGADDAK.K                | 5            | CKAP4_HUMAN          |
| <b><i>Cytoskeleton-associated protein 5 - Homo sapiens (Human)</i></b>               |               |                  |                                 |              |                      |
| Q14008                                                                               | 2             | 3.5768           | R.KGPAEDMSSK.L                  | 1            | CKAP5_HUMAN          |
| <b><i>Cytosol aminopeptidase - Homo sapiens (Human)</i></b>                          |               |                  |                                 |              |                      |
| P28838                                                                               | 2             | 4.5181           | K.GVLFASGQNLAR.Q                | 3            | AMPL_HUMAN           |
| P28838                                                                               | 3             | 4.6463           | R.TFYGLHQDFPSVVLVGLGK.K         | 2            | AMPL_HUMAN           |

| <i>Accession No*</i>                                                     | <i>Charge</i> | <i>XC(Max)**</i> | <i>Peptide*</i>                  | <i>TC***</i> | <i>Reference No*</i> |
|--------------------------------------------------------------------------|---------------|------------------|----------------------------------|--------------|----------------------|
| <b><i>Cytosolic non-specific dipeptidase - Homo sapiens (Human)</i></b>  |               |                  |                                  |              |                      |
| Q96KP4                                                                   | 2             | 4.7516           | K.LPDGSEIPLPILLGR.L              | 1            | CNDP2_HUMAN          |
| <b><i>Cytospin-A - Homo sapiens (Human)</i></b>                          |               |                  |                                  |              |                      |
| Q69YQ0                                                                   | 2             | 3.4604           | K.TPPAAAVSPM#QR.H                | 1            | CY TSA_HUMAN         |
| <b><i>DDI1 homolog 2 - Homo sapiens (Human)</i></b>                      |               |                  |                                  |              |                      |
| Q5TDH0                                                                   | 2             | 2.7454           | R.VLVEQQQDR.A                    | 1            | DDI2_HUMAN           |
| Q5TDH0                                                                   | 2             | 4.1373           | R.NPPLAEALLSGDLEK.F              | 1            | DDI2_HUMAN           |
| <b><i>D-dopachrome decarboxylase - Homo sapiens (Human)</i></b>          |               |                  |                                  |              |                      |
| P30046                                                                   | 2             | 3.7786           | R.FFPLESWQIGK.I                  | 3            | DOPD_HUMAN           |
| <b><i>DEAD box protein 23 - Homo sapiens (Human)</i></b>                 |               |                  |                                  |              |                      |
| Q9BUQ8                                                                   | 3             | 3.9042           | K.KAE EEA EAKPK.F                | 2            | DDX23_HUMAN          |
| Q9BUQ8                                                                   | 3             | 5.0899           | R.MERETNGNEDEEGRQK.I             | 2            | DDX23_HUMAN          |
| <b><i>Death-associated protein 1 - Homo sapiens (Human)</i></b>          |               |                  |                                  |              |                      |
| P51397                                                                   | 2             | 3.3281           | R.IVQKHPHTGDTK.E                 | 4            | DAP1_HUMAN           |
| P51397                                                                   | 2             | 2.7349           | R.TQHIQQPR.K                     | 1            | DAP1_HUMAN           |
| <b><i>Death-inducer obliterator 1 - Homo sapiens (Human)</i></b>         |               |                  |                                  |              |                      |
| Q9BTC0                                                                   | 2             | 2.7712           | R.GGAPFQFGGQR.R                  | 1            | DIDO1_HUMAN          |
| Q9BTC0                                                                   | 2             | 2.7442           | R.QAGPAPAAATAASK.K               | 1            | DIDO1_HUMAN          |
| Q9BTC0                                                                   | 2             | 2.9453           | K.VGGSQPPFQGQR.E                 | 1            | DIDO1_HUMAN          |
| Q9BTC0                                                                   | 2             | 2.7531           | K.STAPLLDVFSSMLK.D               | 1            | DIDO1_HUMAN          |
| Q9BTC0                                                                   | 2             | 3.7774           | K.IFQPVIEAPGASK.C                | 1            | DIDO1_HUMAN          |
| Q9BTC0                                                                   | 2             | 3.0855           | R.SGPQSASTAVK.E                  | 2            | DIDO1_HUMAN          |
| <b><i>Dedicator of cytokinesis protein 1 - Homo sapiens (Human)</i></b>  |               |                  |                                  |              |                      |
| Q14185                                                                   | 3             | 4.7402           | K.GSVADYGNLMENQDLLGSPTPPPPPHQR.H | 2            | DOCK1_HUMAN          |
| Q14185                                                                   | 2             | 3.2751           | K.SQVM#NVIGSER.R                 | 2            | DOCK1_HUMAN          |
| Q14185                                                                   | 2             | 2.8623           | K.SQVMNVIGSER.R                  | 1            | DOCK1_HUMAN          |
| Q14185                                                                   | 2             | 2.8693           | R.KQTSVDSGIVQ.-                  | 3            | DOCK1_HUMAN          |
| Q14185                                                                   | 2             | 5.5337           | R.RFSVSPSSPSSQQTPPPVTPR.A        | 3            | DOCK1_HUMAN          |
| <b><i>Dedicator of cytokinesis protein 11 - Homo sapiens (Human)</i></b> |               |                  |                                  |              |                      |
| Q5JSL3                                                                   | 2             | 2.8317           | R.EMLWGSSTQLASDGSPK.G            | 1            | Q5JSL3_HUMAN         |
| <b><i>Dedicator of cytokinesis protein 2 - Homo sapiens (Human)</i></b>  |               |                  |                                  |              |                      |
| Q92608                                                                   | 2             | 3.9052           | K.SAEEGKQIPDSLSTDL.-             | 1            | DOCK2_HUMAN          |
| <b><i>Dedicator of cytokinesis protein 5 - Homo sapiens (Human)</i></b>  |               |                  |                                  |              |                      |
| Q9H7D0                                                                   | 2             | 4.0694           | R.KSGIPTSEPGSQ.-                 | 3            | DOCK5_HUMAN          |
| Q9H7D0                                                                   | 3             | 3.9971           | R.LSPFHGSSPPQSTPLSPPLTPK.A       | 1            | DOCK5_HUMAN          |

| <i>Accession No*</i>                                                                                        | <i>Charge</i> | <i>XC(Max)**</i> | <i>Peptide*</i>                    | <i>TC***</i> | <i>Reference No*</i> |
|-------------------------------------------------------------------------------------------------------------|---------------|------------------|------------------------------------|--------------|----------------------|
| <b><i>Dedicator of cytokinesis protein 6 - Homo sapiens (Human)</i></b>                                     |               |                  |                                    |              |                      |
| Q96HP0                                                                                                      | 2             | 2.7508           | K.SISSNPDLAVAPGSVDDEVSR.I          | 1            | DOCK6_HUMAN          |
| <b><i>Delta-1-pyrroline-5-carboxylate dehydrogenase, mitochondrial precursor - Homo sapiens (Human)</i></b> |               |                  |                                    |              |                      |
| P30038                                                                                                      | 2             | 2.8696           | K.STGSIVGQQPFGGAR.A                | 1            | AL4A1_HUMAN          |
| P30038                                                                                                      | 2             | 3.1007           | R.NAAGNFYINDK.S                    | 1            | AL4A1_HUMAN          |
| <b><i>Dematin - Homo sapiens (Human)</i></b>                                                                |               |                  |                                    |              |                      |
| Q08495                                                                                                      | 2             | 4.0721           | R.LQKQPLTSPGSVSPSR.D               | 1            | DEMA_HUMAN           |
| Q08495                                                                                                      | 4             | 4.867            | K.AILDIERPDLM#IYEPHFTYSLLEHVELPR.S | 1            | DEMA_HUMAN           |
| Q08495                                                                                                      | 2             | 2.8502           | K.MDNQVLGYK.D                      | 1            | DEMA_HUMAN           |
| Q08495                                                                                                      | 2             | 4.306            | K.MDNQVLGYKDLAAIPK.D               | 6            | DEMA_HUMAN           |
| Q08495                                                                                                      | 2             | 3.3271           | R.DSSVPGSPSSIVAK.M                 | 3            | DEMA_HUMAN           |
| <b><i>Density-regulated protein - Homo sapiens (Human)</i></b>                                              |               |                  |                                    |              |                      |
| O43583                                                                                                      | 2             | 3.0837           | K.LDADYPLR.V                       | 2            | DENR_HUMAN           |
| O43583                                                                                                      | 3             | 4.0229           | K.WPEVDDDSIEDLGEVKK.-              | 2            | DENR_HUMAN           |
| <b><i>Deoxyhypusine hydroxylase - Homo sapiens (Human)</i></b>                                              |               |                  |                                    |              |                      |
| Q9BU89                                                                                                      | 2             | 3.94             | R.AFQYADGLEQLR.G                   | 2            | DOHH_HUMAN           |
| Q9BU89                                                                                                      | 4             | 5.0801           | R.RLEWLQQHGGPEAAGPYLSVDPAPPAEERD   | 1            | DOHH_HUMAN           |
| <b><i>Deoxynucleotidyltransferase terminal-interacting protein 2 - Homo sapiens (Human)</i></b>             |               |                  |                                    |              |                      |
| Q5TFJ4                                                                                                      | 1             | 2.1171           | K.QQM#QKEKSSER.R                   | 1            | Q5TFJ4_HUMAN         |
| Q5TFJ4                                                                                                      | 2             | 3.7803           | K.ASIQAASAESSGQK.S                 | 2            | Q5TFJ4_HUMAN         |
| Q5TFJ4                                                                                                      | 3             | 4.7666           | K.ESYTEEIVSEAESHVSGISR.I           | 1            | Q5TFJ4_HUMAN         |
| Q5TFJ4                                                                                                      | 2             | 2.9914           | K.LYTSAPNTSQGK.D                   | 1            | Q5TFJ4_HUMAN         |
| Q5TFJ4                                                                                                      | 3             | 4.5161           | K.NLSELQDTSLQQLVSQR.H              | 2            | Q5TFJ4_HUMAN         |
| Q5TFJ4                                                                                                      | 2             | 2.862            | K.QIVGTPVNSESDTR.Q                 | 1            | Q5TFJ4_HUMAN         |
| <b><i>Deoxyribonuclease-2-alpha precursor - Homo sapiens (Human)</i></b>                                    |               |                  |                                    |              |                      |
| O00115                                                                                                      | 2             | 3.7355           | R.ALINSPEGAVGR.S                   | 5            | DNS2A_HUMAN          |
| O00115                                                                                                      | 2             | 3.7552           | K.YLDESSGGWR.D                     | 4            | DNS2A_HUMAN          |
| <b><i>DERPC - Homo sapiens (Human)</i></b>                                                                  |               |                  |                                    |              |                      |
| Q71E72                                                                                                      | 2             | 3.3284           | R.GAGSSAFSQSSGTLASNPATFQR.S        | 1            | Q71E72_HUMAN         |
| Q71E72                                                                                                      | 2             | 3.1397           | R.GGGPM#GPGSGPNLR.A                | 2            | Q71E72_HUMAN         |
| Q71E72                                                                                                      | 2             | 3.7056           | R.GGGPMGPGSGPNLR.A                 | 3            | Q71E72_HUMAN         |
| Q71E72                                                                                                      | 2             | 2.7691           | R.LGGLPGPGPMSNPR.A                 | 1            | Q71E72_HUMAN         |
| <b><i>Desmin - Homo sapiens (Human)</i></b>                                                                 |               |                  |                                    |              |                      |
| P17661                                                                                                      | 3             | 4.5172           | R.RIESLNEEIAFLK.K                  | 2            | DESM_HUMAN           |
| P17661                                                                                                      | 2             | 4.5185           | R.TFGGAPGFPLGSPLSSPVFPR.A          | 3            | DESM_HUMAN           |

| <i>Accession No*</i>                                                                    | <i>Charge</i> | <i>XC(Max)**</i> | <i>Peptide*</i>                   | <i>TC***</i> | <i>Reference No*</i> |
|-----------------------------------------------------------------------------------------|---------------|------------------|-----------------------------------|--------------|----------------------|
| P17661                                                                                  | 2             | 3.1935           | R.TSGGAGGLGSLR.A                  | 2            | DESM_HUMAN           |
| <b><i>Desmocollin-2 precursor - Homo sapiens (Human)</i></b>                            |               |                  |                                   |              |                      |
| Q02487                                                                                  | 2             | 2.974            | R.GPGVDQEPR.N                     | 1            | DSC2_HUMAN           |
| <b><i>Desmoglein-2 precursor - Homo sapiens (Human)</i></b>                             |               |                  |                                   |              |                      |
| Q14126                                                                                  | 3             | 4.4557           | K.SLQEANA EKVTQEIVTER.S           | 2            | DSG2_HUMAN           |
| Q14126                                                                                  | 2             | 4.576            | R.ILDVNDNIPVVENK.V                | 3            | DSG2_HUMAN           |
| Q14126                                                                                  | 3             | 5.2906           | R.ERESFLAPSSGVQPTLAMPNIAVGQNVTVTE | 1            | DSG2_HUMAN           |
| Q14126                                                                                  | 2             | 3.621            | R.ATQFTGATGAIMTTETTK.T            | 2            | DSG2_HUMAN           |
| Q14126                                                                                  | 2             | 3.2351           | K.IDINKEIEQR.Q                    | 1            | DSG2_HUMAN           |
| Q14126                                                                                  | 2             | 3.8642           | K.AASYTEEDENHTAK.D                | 1            | DSG2_HUMAN           |
| Q14126                                                                                  | 2             | 3.8342           | R.DNGEVTDKPVK.Q                   | 1            | DSG2_HUMAN           |
| <b><i>Desmuslin - Homo sapiens (Human)</i></b>                                          |               |                  |                                   |              |                      |
| O15061                                                                                  | 2             | 3.3574           | R.EVPVYIGEDSTIAR.E                | 1            | DMN_HUMAN            |
| O15061                                                                                  | 3             | 4.9235           | K.VALLYLDNEEEENDGHWF.-            | 2            | DMN_HUMAN            |
| O15061                                                                                  | 2             | 3.8037           | R.TQEAGALGVSDR.G                  | 2            | DMN_HUMAN            |
| O15061                                                                                  | 2             | 3.142            | R.SPAPGSPDEEGGAEAPAAGIR.F         | 1            | DMN_HUMAN            |
| O15061                                                                                  | 2             | 3.13             | R.YSQDEIVQGTR.R                   | 3            | DMN_HUMAN            |
| O15061                                                                                  | 2             | 4.0423           | R.SGEFHA EPTVIEK.E                | 2            | DMN_HUMAN            |
| O15061                                                                                  | 3             | 3.89             | R.QFHAEKEIIFQGPISAAGK.V           | 1            | DMN_HUMAN            |
| O15061                                                                                  | 2             | 3.9311           | R.MREELSALTR.E                    | 4            | DMN_HUMAN            |
| O15061                                                                                  | 2             | 3.1287           | R.HVTLGPGQSPLSR.E                 | 1            | DMN_HUMAN            |
| O15061                                                                                  | 2             | 3.1026           | R.EVPISLEV SQDR.R                 | 2            | DMN_HUMAN            |
| O15061                                                                                  | 2             | 4.307            | R.ELYIPSGESEVAGGASHSSGQR.T        | 2            | DMN_HUMAN            |
| O15061                                                                                  | 2             | 3.2373           | R.EGQGGPGSVSVDVK.K                | 2            | DMN_HUMAN            |
| O15061                                                                                  | 2             | 3.9149           | R.DKVAAGASESTR.S                  | 2            | DMN_HUMAN            |
| O15061                                                                                  | 2             | 3.7757           | R.DADSRNDQAVGV SFK.A              | 3            | DMN_HUMAN            |
| O15061                                                                                  | 2             | 3.4267           | K.VGDYFATEESVGTQTSVR.Q            | 1            | DMN_HUMAN            |
| O15061                                                                                  | 3             | 4.134            | K.SAEQMIGDIINLGLK.G               | 1            | DMN_HUMAN            |
| O15061                                                                                  | 3             | 5.6405           | K.VVKPLDVPAPSLEGDLGSTHWK.E        | 3            | DMN_HUMAN            |
| <b><i>Deubiquitinating protein VCIP135 - Homo sapiens (Human)</i></b>                   |               |                  |                                   |              |                      |
| Q96JH7                                                                                  | 2             | 3.3394           | K.TEPSVFTASSNSELIR.I              | 2            | VCIP1_HUMAN          |
| Q96JH7                                                                                  | 2             | 2.7332           | R.DGPSSAPATPTK.A                  | 1            | VCIP1_HUMAN          |
| Q96JH7                                                                                  | 2             | 4.2289           | R.DQSTEQSPSDLPQR.K                | 4            | VCIP1_HUMAN          |
| <b><i>Development and differentiation-enhancing factor 2 - Homo sapiens (Human)</i></b> |               |                  |                                   |              |                      |
| O43150                                                                                  | 2             | 3.2284           | K.VQTASSANTLWK.T                  | 2            | DDEF2_HUMAN          |

| <i>Accession No*</i>                                                                 | <i>Charge</i> | <i>XC(Max)**</i> | <i>Peptide*</i>              | <i>TC***</i> | <i>Reference No*</i> |
|--------------------------------------------------------------------------------------|---------------|------------------|------------------------------|--------------|----------------------|
| O43150                                                                               | 2             | 3.8784           | R.VTSTNPLTPTPPPPVAK.T        | 5            | DDEF2_HUMAN          |
| O43150                                                                               | 2             | 2.703            | K.GAFPVSFVHFIAD.-            | 1            | DDEF2_HUMAN          |
| <b><i>Developmentally-regulated GTP-binding protein 1 - Homo sapiens (Human)</i></b> |               |                  |                              |              |                      |
| Q9Y295                                                                               | 2             | 4.368            | K.IAEIEAEMAR.T               | 2            | DRG1_HUMAN           |
| <b><i>Differentially expressed in FDCP 6 - Homo sapiens (Human)</i></b>              |               |                  |                              |              |                      |
| Q9H4E7                                                                               | 2             | 2.8209           | R.IKELEEMQQR.L               | 1            | DEFI6_HUMAN          |
| Q9H4E7                                                                               | 2             | 3.0711           | R.TPSPNSNEQQK.S              | 3            | DEFI6_HUMAN          |
| <b><i>Dihydropyrimidinase - Homo sapiens (Human)</i></b>                             |               |                  |                              |              |                      |
| Q14117                                                                               | 2             | 3.3416           | R.VTKEDATAGTR.K              | 1            | DPYS_HUMAN           |
| Q14117                                                                               | 3             | 4.0049           | R.VTKEDATAGTRK.Q             | 2            | DPYS_HUMAN           |
| <b><i>Dihydropyrimidinase-like 2 - Homo sapiens (Human)</i></b>                      |               |                  |                              |              |                      |
| Q86U75                                                                               | 3             | 4.0355           | K.AM#EGIFIKPSVEPSAGHDEL.-    | 2            | Q86U75_HUMAN         |
| Q86U75                                                                               | 3             | 4.1216           | K.AMEGIFIKPSVEPSAGHDEL.-     | 1            | Q86U75_HUMAN         |
| <b><i>Dihydropyrimidinase-related protein 2 - Homo sapiens (Human)</i></b>           |               |                  |                              |              |                      |
| Q16555                                                                               | 2             | 2.7608           | R.GLYDGPVCEVSVTPK.T          | 1            | DPYL2_HUMAN          |
| Q16555                                                                               | 3             | 5.424            | R.NLHQSGFSLSGAQIDNIPR.R      | 3            | DPYL2_HUMAN          |
| <b><i>DIP2B protein - Homo sapiens (Human)</i></b>                                   |               |                  |                              |              |                      |
| Q6B011                                                                               | 2             | 3.8064           | R.NQTPAPSAAQTSAPSK.Y         | 2            | Q6B011_HUMAN         |
| Q6B011                                                                               | 3             | 5.7628           | R.SKLLSPYSPQTQETDSAVQK.E     | 3            | Q6B011_HUMAN         |
| Q6B011                                                                               | 2             | 3.8546           | K.GTSGSLADVFNTR.I            | 1            | Q6B011_HUMAN         |
| <b><i>Disabled homolog 2 - Homo sapiens (Human)</i></b>                              |               |                  |                              |              |                      |
| P98082                                                                               | 3             | 3.8781           | K.KGPEKTDEYLLAR.F            | 2            | DAB2_HUMAN           |
| P98082                                                                               | 2             | 5.1914           | R.KGEQTSSGTLFAFASYFNSK.V     | 5            | DAB2_HUMAN           |
| P98082                                                                               | 3             | 5.1022           | R.AGPPKDISSDAFTALDPLGDKEIK.D | 1            | DAB2_HUMAN           |
| P98082                                                                               | 2             | 3.7663           | K.VGIPQENADHDDFDANQLLNK.I    | 1            | DAB2_HUMAN           |
| P98082                                                                               | 2             | 3.5876           | K.TGQQAELVVDLK.D             | 1            | DAB2_HUMAN           |
| P98082                                                                               | 2             | 3.8211           | K.STDNAFENPFFK.D             | 5            | DAB2_HUMAN           |
| P98082                                                                               | 2             | 3.7558           | K.LIGIDVDPARGDK.M            | 1            | DAB2_HUMAN           |
| P98082                                                                               | 2             | 2.7708           | K.INEPKPAPR.Q                | 1            | DAB2_HUMAN           |
| P98082                                                                               | 3             | 5.595            | K.DSFGSSQASVASSQPVSSEMYR.D   | 8            | DAB2_HUMAN           |
| P98082                                                                               | 2             | 3.1416           | K.DSFGSSQASVASSQPVSSEM#YR.D  | 1            | DAB2_HUMAN           |
| P98082                                                                               | 2             | 2.868            | K.DLFQVIYNVK.K               | 1            | DAB2_HUMAN           |
| P98082                                                                               | 2             | 4.1169           | K.DISSDAFTALDPLGDKEIK.D      | 2            | DAB2_HUMAN           |
| P98082                                                                               | 2             | 3.846            | K.LIGIDVDPARGDK.M            | 3            | DAB2_HUMAN           |
| <b><i>Disabled homolog 2-interacting protein - Homo sapiens (Human)</i></b>          |               |                  |                              |              |                      |

| <i>Accession No*</i>                                                                               | <i>Charge</i> | <i>XC(Max)**</i> | <i>Peptide*</i>                 | <i>TC***</i> | <i>Reference No*</i> |
|----------------------------------------------------------------------------------------------------|---------------|------------------|---------------------------------|--------------|----------------------|
| Q5VWQ8                                                                                             | 3             | 4.8943           | R.RIDQPPPPPPPPPPAPR.G           | 2            | DAB2P_HUMAN          |
| Q5VWQ8                                                                                             | 2             | 3.9067           | K.LGSFSTAAEELAR.R               | 2            | DAB2P_HUMAN          |
| <b><i>Discoidin, CUB and LCCL domain-containing protein 2 precursor - Homo sapiens (Human)</i></b> |               |                  |                                 |              |                      |
| Q96PD2                                                                                             | 3             | 3.9961           | K.AGKGPLPAPDELVYQVPQSTQEVSAGR.D | 1            | DCBD2_HUMAN          |
| <b><i>Disco-interacting protein 2 homolog A - Homo sapiens (Human)</i></b>                         |               |                  |                                 |              |                      |
| Q14689                                                                                             | 3             | 4.1938           | R.FRSDVHTEAVQAALAK.Y            | 2            | DIP2A_HUMAN          |
| <b><i>Disks large-associated protein 1 - Homo sapiens (Human)</i></b>                              |               |                  |                                 |              |                      |
| O14490                                                                                             | 2             | 2.8528           | K.ANNWKQMDPLDKK.E               | 1            | DLGP1_HUMAN          |
| <b><i>DNA - Homo sapiens (Human)</i></b>                                                           |               |                  |                                 |              |                      |
| P26358                                                                                             | 3             | 3.733            | R.SKSDGEAKPEPSPSPR.I            | 1            | DNMT1_HUMAN          |
| P26358                                                                                             | 2             | 2.9587           | R.VPTLAVPAISLPDDVR.R            | 2            | DNMT1_HUMAN          |
| <b><i>DNA damage-binding protein 2 - Homo sapiens (Human)</i></b>                                  |               |                  |                                 |              |                      |
| Q92466                                                                                             | 2             | 2.8766           | K.TSEIVLRPR.N                   | 1            | DDB2_HUMAN           |
| <b><i>DNA fragmentation factor subunit alpha - Homo sapiens (Human)</i></b>                        |               |                  |                                 |              |                      |
| O00273                                                                                             | 3             | 3.8201           | K.QLLQLYLQALEKEGSLLSKQEESK.A    | 1            | DFFA_HUMAN           |
| O00273                                                                                             | 2             | 3.6423           | R.LQHTLQQVLDQR.E                | 1            | DFFA_HUMAN           |
| O00273                                                                                             | 2             | 3.4203           | R.LQQTQSLHSLR.S                 | 1            | DFFA_HUMAN           |
| O00273                                                                                             | 3             | 3.8848           | R.EQHGVAASCLEDLR.S              | 2            | DFFA_HUMAN           |
| O00273                                                                                             | 2             | 3.338            | K.FVALASNEK.W                   | 8            | DFFA_HUMAN           |
| O00273                                                                                             | 2             | 3.3054           | K.EGSLLSKQEESK.A                | 2            | DFFA_HUMAN           |
| O00273                                                                                             | 2             | 4.3172           | K.AAFGEEVDAVDTGISR.E            | 3            | DFFA_HUMAN           |
| O00273                                                                                             | 2             | 4.9952           | R.ETSSDVALASHILTALR.E           | 3            | DFFA_HUMAN           |
| O00273                                                                                             | 2             | 3.5936           | K.KTETVQEACER.E                 | 1            | DFFA_HUMAN           |
| <b><i>DNA polymerase epsilon subunit 3 - Homo sapiens (Human)</i></b>                              |               |                  |                                 |              |                      |
| Q9NRF9                                                                                             | 2             | 2.8118           | K.TLNASDVLSAMEEMEFQR.F          | 1            | DPOE3_HUMAN          |
| <b><i>DNA polymerase subunit delta 3 - Homo sapiens (Human)</i></b>                                |               |                  |                                 |              |                      |
| Q15054                                                                                             | 2             | 3.4164           | K.IVEQPTVSVTEPK.L               | 2            | DPOD3_HUMAN          |
| Q15054                                                                                             | 2             | 3.6104           | K.EVTNASAAGNK.A                 | 3            | DPOD3_HUMAN          |
| Q15054                                                                                             | 2             | 4.0206           | K.EVTNASAAGNKAPGK.G             | 3            | DPOD3_HUMAN          |
| <b><i>DNA topoisomerase 1 - Homo sapiens (Human)</i></b>                                           |               |                  |                                 |              |                      |
| P11387                                                                                             | 3             | 4.9542           | R.KLEEEEDGK.LK                  | 1            | TOP1_HUMAN           |
| P11387                                                                                             | 2             | 3.7502           | R.DEDDADYKPK.K                  | 7            | TOP1_HUMAN           |
| P11387                                                                                             | 2             | 2.8088           | R.KLEEEEDGK.L                   | 1            | TOP1_HUMAN           |
| <b><i>DNA topoisomerase 2-binding protein 1 - Homo sapiens (Human)</i></b>                         |               |                  |                                 |              |                      |
| Q92547                                                                                             | 2             | 2.8178           | R.TGKRADESHFLIENSTK.E           | 1            | TOPB1_HUMAN          |

| <i>Accession No*</i>                                                                | <i>Charge</i> | <i>XC(Max)**</i> | <i>Peptide*</i>                   | <i>TC***</i> | <i>Reference No*</i> |
|-------------------------------------------------------------------------------------|---------------|------------------|-----------------------------------|--------------|----------------------|
| <b><i>DNA-(apurinic or apyrimidinic site) lyase - Homo sapiens (Human)</i></b>      |               |                  |                                   |              |                      |
| P27695                                                                              | 2             | 2.8506           | K.GAVAEDGDEL.R.T                  | 3            | APEX1_HUMAN          |
| P27695                                                                              | 2             | 5.3772           | K.GAVAEDGDEL.RTEPEAK.K            | 14           | APEX1_HUMAN          |
| P27695                                                                              | 2             | 3.3779           | K.KGAVAEDGDEL.R.T                 | 1            | APEX1_HUMAN          |
| P27695                                                                              | 2             | 4.3911           | K.KGAVAEDGDEL.RTEPEAK.K           | 3            | APEX1_HUMAN          |
| <b><i>DNA-binding protein A - Homo sapiens (Human)</i></b>                          |               |                  |                                   |              |                      |
| P16989                                                                              | 3             | 5.1767           | R.PAPAVGEAEDKENQQATSGPNQPSVR.R    | 2            | DBPA_HUMAN           |
| P16989                                                                              | 2             | 2.7049           | R.RPYNYR.R                        | 1            | DBPA_HUMAN           |
| P16989                                                                              | 4             | 6.3994           | K.SPVGSGAPQAAAPAPAAHVAGNPGGDAAPA  | 1            | DBPA_HUMAN           |
| P16989                                                                              | 3             | 6.0152           | R.IQAGEIGEMKDGVPEGAQLQGPVHR.N     | 2            | DBPA_HUMAN           |
| <b><i>DNA-dependent protein kinase catalytic subunit - Homo sapiens (Human)</i></b> |               |                  |                                   |              |                      |
| P78527                                                                              | 3             | 4.6868           | K.RLGLPGDEVDNKVK.G                | 2            | PRKDC_HUMAN          |
| <b><i>DNA-directed RNA polymerase I subunit RPA34 - Homo sapiens (Human)</i></b>    |               |                  |                                   |              |                      |
| O15446                                                                              | 3             | 7.3073           | K.NQQLKEPEAAGPVGTEPTVETLEPLGVLFPS | 2            | RPA34_HUMAN          |
| O15446                                                                              | 2             | 3.5841           | K.QEQINTEPLEDTVLSPTK.K            | 1            | RPA34_HUMAN          |
| <b><i>DNA-directed RNA polymerase II subunit RPB1 - Homo sapiens (Human)</i></b>    |               |                  |                                   |              |                      |
| P24928                                                                              | 2             | 3.5002           | K.YSPTSPTYSPVYPTSPK.Y             | 1            | RPB1_HUMAN           |
| <b><i>DNA-directed RNA polymerase II subunit RPB9 - Homo sapiens (Human)</i></b>    |               |                  |                                   |              |                      |
| P36954                                                                              | 2             | 3.6821           | K.EAVFFQSHSAR.A                   | 3            | RPB9_HUMAN           |
| <b><i>DnaJ homolog subfamily A member 5 - Homo sapiens (Human)</i></b>              |               |                  |                                   |              |                      |
| Q5F1R6                                                                              | 2             | 2.9545           | R.DASEEELKK.A                     | 1            | DNJA5_HUMAN          |
| <b><i>DnaJ homolog subfamily B member 1 - Homo sapiens (Human)</i></b>              |               |                  |                                   |              |                      |
| P25685                                                                              | 2             | 2.9878           | R.GASDEEIKR.A                     | 1            | DNJB1_HUMAN          |
| P25685                                                                              | 2             | 2.8998           | R.KKQDPPVTHDLR.V                  | 1            | DNJB1_HUMAN          |
| P25685                                                                              | 2             | 3.1324           | R.DGSDVIYPAR.I                    | 1            | DNJB1_HUMAN          |
| <b><i>DnaJ homolog subfamily B member 12 - Homo sapiens (Human)</i></b>             |               |                  |                                   |              |                      |
| Q9NXW2                                                                              | 2             | 3.3387           | K.AGGTDAPSANGEAGGESTK.G           | 2            | DJB12_HUMAN          |
| <b><i>DnaJ homolog subfamily B member 14 - Homo sapiens (Human)</i></b>             |               |                  |                                   |              |                      |
| Q8TBM8                                                                              | 2             | 2.8246           | K.DAGDEDLKK.A                     | 1            | DJB14_HUMAN          |
| <b><i>DnaJ homolog subfamily B member 2 - Homo sapiens (Human)</i></b>              |               |                  |                                   |              |                      |
| P25686                                                                              | 2             | 3.7764           | R.AEAGSGGPGFTTFR.S                | 1            | DNJB2_HUMAN          |
| P25686                                                                              | 3             | 5.2272           | R.EFFGSGDPFAELFDDLGPFSSELQNR.G    | 2            | DNJB2_HUMAN          |
| P25686                                                                              | 2             | 2.9211           | R.EGLTGTGTGPSR.A                  | 2            | DNJB2_HUMAN          |
| P25686                                                                              | 2             | 3.4956           | R.REQQPSVTSR.S                    | 1            | DNJB2_HUMAN          |
| P25686                                                                              | 2             | 2.7493           | R.SASADDIKK.A                     | 1            | DNJB2_HUMAN          |

| <i>Accession No*</i>                                                    | <i>Charge</i> | <i>XC(Max)**</i> | <i>Peptide*</i>                    | <i>TC***</i> | <i>Reference No*</i> |
|-------------------------------------------------------------------------|---------------|------------------|------------------------------------|--------------|----------------------|
| <b><i>DnaJ homolog subfamily B member 6 - Homo sapiens (Human)</i></b>  |               |                  |                                    |              |                      |
| O75190                                                                  | 2             | 4.0485           | R.APGPWDPLASAAGLK.E                | 2            | DNJB6_HUMAN          |
| <b><i>DnaJ homolog subfamily C member 1 - Homo sapiens (Human)</i></b>  |               |                  |                                    |              |                      |
| Q96KC8                                                                  | 3             | 4.2029           | R.EDAEGVAAEEEEQEGDSGEQETGATDARPR.  | 2            | DNJC1_HUMAN          |
| Q96KC8                                                                  | 2             | 3.9876           | R.LLEATAKPEPEEK.S                  | 4            | DNJC1_HUMAN          |
| Q96KC8                                                                  | 2             | 3.9449           | R.SAEEPWTQNQQK.L                   | 4            | DNJC1_HUMAN          |
| Q96KC8                                                                  | 2             | 2.9644           | K.STVQNSRPIK.T                     | 1            | DNJC1_HUMAN          |
| <b><i>DnaJ homolog subfamily C member 17 - Homo sapiens (Human)</i></b> |               |                  |                                    |              |                      |
| Q9NVM6                                                                  | 2             | 3.4276           | R.QAQAQSEEEEEESR.S                 | 2            | DJC17_HUMAN          |
| Q9NVM6                                                                  | 2             | 3.373            | K.ISWLEGQPQDAVGR.S                 | 1            | DJC17_HUMAN          |
| <b><i>DnaJ homolog subfamily C member 2 - Homo sapiens (Human)</i></b>  |               |                  |                                    |              |                      |
| Q99543                                                                  | 2             | 3.5207           | K.AAQEQVLNASR.A                    | 1            | DNJC2_HUMAN          |
| <b><i>DnaJ homolog subfamily C member 8 - Homo sapiens (Human)</i></b>  |               |                  |                                    |              |                      |
| O75937                                                                  | 1             | 2.8393           | R.NFQANTK.G                        | 3            | DNJC8_HUMAN          |
| O75937                                                                  | 3             | 3.9414           | R.QLSILVHPDKNQDDADRAQK.A           | 1            | DNJC8_HUMAN          |
| O75937                                                                  | 3             | 4.8804           | R.LTRPGSSYFNLNPFVQLQIDPEVTDEEIKK.R | 1            | DNJC8_HUMAN          |
| O75937                                                                  | 1             | 2.3005           | R.DSVLTSK.N                        | 2            | DNJC8_HUMAN          |
| O75937                                                                  | 3             | 5.5869           | R.ALDVIQAGKEYVEHTVKER.K            | 2            | DNJC8_HUMAN          |
| O75937                                                                  | 3             | 4.3187           | R.ALDVIQAGKEYVEHTVK.E              | 4            | DNJC8_HUMAN          |
| O75937                                                                  | 1             | 3.2324           | K.LLLDQEQK.K                       | 3            | DNJC8_HUMAN          |
| O75937                                                                  | 2             | 3.6393           | K.LFAELEIK.R                       | 3            | DNJC8_HUMAN          |
| O75937                                                                  | 3             | 4.3648           | K.KEGKPTIVEEDDPELKF.Q              | 1            | DNJC8_HUMAN          |
| O75937                                                                  | 3             | 4.6151           | K.EGKPTIVEEDDPELKF.Q               | 2            | DNJC8_HUMAN          |
| O75937                                                                  | 1             | 2.4807           | K.AFEAVDK.A                        | 1            | DNJC8_HUMAN          |
| O75937                                                                  | 2             | 3.519            | K.AFEAVDKAYK.L                     | 2            | DNJC8_HUMAN          |
| O75937                                                                  | 3             | 4.6497           | R.QREEEIEAQEK.A                    | 6            | DNJC8_HUMAN          |
| O75937                                                                  | 2             | 3.7144           | R.ALDVIQAGK.E                      | 4            | DNJC8_HUMAN          |
| <b><i>DnaJ homolog subfamily C member 9 - Homo sapiens (Human)</i></b>  |               |                  |                                    |              |                      |
| Q8WXX5                                                                  | 2             | 4.9082           | K.KISLEDIQAFEK.T                   | 1            | DNJC9_HUMAN          |
| Q8WXX5                                                                  | 2             | 4.6397           | K.ISLEDIQAFEK.T                    | 3            | DNJC9_HUMAN          |
| <b><i>DNA-repair protein XRCC1 - Homo sapiens (Human)</i></b>           |               |                  |                                    |              |                      |
| P18887                                                                  | 2             | 3.7415           | R.AIGSTSKPQESPK.G                  | 2            | XRCC1_HUMAN          |
| P18887                                                                  | 2             | 2.8757           | R.KLDLNQEEK.K                      | 1            | XRCC1_HUMAN          |
| <b><i>Docking protein 1 - Homo sapiens (Human)</i></b>                  |               |                  |                                    |              |                      |
| Q99704                                                                  | 2             | 3.635            | K.SHNSALYSQVQK.S                   | 1            | DOK1_HUMAN           |



| <i>Accession No*</i>                                                                                                         | <i>Charge</i> | <i>XC(Max)**</i> | <i>Peptide*</i>                 | <i>TC***</i> | <i>Reference No*</i> |
|------------------------------------------------------------------------------------------------------------------------------|---------------|------------------|---------------------------------|--------------|----------------------|
| Q99704                                                                                                                       | 3             | 3.9232           | R.STKPLLAPKPQGPAFPEPGTATGSGIK.S | 1            | DOK1_HUMAN           |
| <b><i>Docking protein 3 - Homo sapiens (Human)</i></b>                                                                       |               |                  |                                 |              |                      |
| Q7L591                                                                                                                       | 3             | 3.9204           | R.LLELDQVEGTGRPDPQAGFK.A        | 2            | DOK3_HUMAN           |
| <b><i>Dolichol-phosphate mannosyltransferase subunit 3 - Homo sapiens (Human)</i></b>                                        |               |                  |                                 |              |                      |
| Q9P2X0                                                                                                                       | 2             | 2.7666           | R.ELQSQIQEAR.A                  | 2            | DPM3_HUMAN           |
| <b><i>Dolichyl-diphosphooligosaccharide--protein glycosyltransferase 67 kDa subunit precursor - Homo sapiens (Human)</i></b> |               |                  |                                 |              |                      |
| P04843                                                                                                                       | 2             | 3.2928           | K.ALTSEIALLQSR.L                | 1            | RIB1_HUMAN           |
| P04843                                                                                                                       | 2             | 3.8789           | K.DTYIENEKLISGK.R               | 2            | RIB1_HUMAN           |
| <b><i>Dolichyl-P-Man:Man(5)GlcNAc(2)-PP-dolichyl mannosyltransferase - Homo sapiens (Human)</i></b>                          |               |                  |                                 |              |                      |
| Q92685                                                                                                                       | 2             | 3.0273           | R.RLLLREPR.Y                    | 3            | ALG3_HUMAN           |
| <b><i>Doublecortin and CaM kinase-like 1 - Homo sapiens (Human)</i></b>                                                      |               |                  |                                 |              |                      |
| Q5VZY9                                                                                                                       | 2             | 3.1628           | R.DLYRPLSSDDLDSVGDV.-           | 2            | Q5VZY9_HUMA          |
| <b><i>Doublecortin domain-containing protein 2 - Homo sapiens (Human)</i></b>                                                |               |                  |                                 |              |                      |
| Q9UHG0                                                                                                                       | 2             | 4.12             | K.STVGSSDNSSPQLKR.K             | 3            | DCDC2_HUMAN          |
| Q9UHG0                                                                                                                       | 3             | 3.9673           | K.KEDVNSEKLT.K                  | 1            | DCDC2_HUMAN          |
| Q9UHG0                                                                                                                       | 2             | 3.4436           | K.STVGSSDNSSPQLKR.R             | 2            | DCDC2_HUMAN          |
| <b><i>Double-strand break repair protein MRE11A - Homo sapiens (Human)</i></b>                                               |               |                  |                                 |              |                      |
| P49959                                                                                                                       | 2             | 3.2095           | K.IM#SQSQVSK.G                  | 2            | MRE11_HUMAN          |
| P49959                                                                                                                       | 2             | 2.8992           | K.IMSQSQVSK.G                   | 3            | MRE11_HUMAN          |
| P49959                                                                                                                       | 2             | 2.8738           | K.NVQLSLLTER.G                  | 1            | MRE11_HUMAN          |
| P49959                                                                                                                       | 2             | 3.8255           | R.ADTGLETSTR.S                  | 4            | MRE11_HUMAN          |
| P49959                                                                                                                       | 2             | 2.7737           | R.NM#SIIDAFK.S                  | 1            | MRE11_HUMAN          |
| <b><i>Double-stranded RNA-specific adenosine deaminase - Homo sapiens (Human)</i></b>                                        |               |                  |                                 |              |                      |
| P55265                                                                                                                       | 2             | 3.0128           | R.NTNSVPETAPAAIPETR.R           | 2            | DSRAD_HUMAN          |
| P55265                                                                                                                       | 2             | 4.0008           | R.DINAVLIDMER.Q                 | 3            | DSRAD_HUMAN          |
| <b><i>Double-stranded RNA-specific editase 1 - Homo sapiens (Human)</i></b>                                                  |               |                  |                                 |              |                      |
| P78563                                                                                                                       | 3             | 5.3952           | K.DGSTPGPGEGSQLSNGGGGGPGR.K     | 2            | RED1_HUMAN           |
| <b><i>Dpy-30-like protein - Homo sapiens (Human)</i></b>                                                                     |               |                  |                                 |              |                      |
| Q9C005                                                                                                                       | 3             | 4.2066           | K.ERPPNPIEFLASYLLK.N            | 6            | DPY30_HUMAN          |
| Q9C005                                                                                                                       | 2             | 3.015            | K.QKVDLQSLPTR.A                 | 1            | DPY30_HUMAN          |
| Q9C005                                                                                                                       | 3             | 6.5069           | R.AYLDQTVVPILLQGLAVLAK.E        | 7            | DPY30_HUMAN          |
| Q9C005                                                                                                                       | 2             | 4.038            | R.IVENEKINAEK.S                 | 6            | DPY30_HUMAN          |
| Q9C005                                                                                                                       | 2             | 3.052            | K.AQFEDRN.-                     | 3            | DPY30_HUMAN          |
| <b><i>DPYSL3 protein - Homo sapiens (Human)</i></b>                                                                          |               |                  |                                 |              |                      |
| Q6DEN2                                                                                                                       | 3             | 3.9136           | R.RGWDSSHEDDLPVYLAR.P           | 1            | Q6DEN2_HUMA          |

| <i>Accession No*</i>                                      | <i>Charge</i> | <i>XC(Max)**</i> | <i>Peptide*</i>             | <i>TC***</i> | <i>Reference No*</i> |
|-----------------------------------------------------------|---------------|------------------|-----------------------------|--------------|----------------------|
| Q6DEN2                                                    | 2             | 2.7889           | K.RIVAPPGGR.S               | 1            | Q6DEN2_HUMA          |
| Q6DEN2                                                    | 2             | 3.3131           | R.PGTTDQVPR.Q               | 2            | Q6DEN2_HUMA          |
| <b><i>Drebrin-like protein - Homo sapiens (Human)</i></b> |               |                  |                             |              |                      |
| Q9UJU6                                                    | 2             | 4.9137           | K.FVLINWTGEGVNDVR.K         | 5            | DBNL_HUMAN           |
| Q9UJU6                                                    | 2             | 3.4559           | K.ASGANYSFHK.E              | 3            | DBNL_HUMAN           |
| Q9UJU6                                                    | 2             | 2.741            | K.DPNSGLPK.F                | 1            | DBNL_HUMAN           |
| Q9UJU6                                                    | 2             | 4.8099           | K.ESGRFQDVGQPAPVGSVYQK.T    | 4            | DBNL_HUMAN           |
| Q9UJU6                                                    | 2             | 4.5808           | R.FQDVGPQAPVGSVYQK.T        | 2            | DBNL_HUMAN           |
| Q9UJU6                                                    | 2             | 4.328            | R.AMSTTSISSPQPGK.L          | 9            | DBNL_HUMAN           |
| Q9UJU6                                                    | 2             | 4.3288           | K.SPTDWALFTYEGNSNDIR.V      | 8            | DBNL_HUMAN           |
| Q9UJU6                                                    | 2             | 2.8119           | K.TNAVSEIKR.V               | 1            | DBNL_HUMAN           |
| Q9UJU6                                                    | 2             | 2.9473           | R.AEEDVEPECIMEK.V           | 2            | DBNL_HUMAN           |
| Q9UJU6                                                    | 2             | 3.5681           | R.AM#STTSISSPQPGK.L         | 4            | DBNL_HUMAN           |
| Q9UJU6                                                    | 1             | 2.2738           | K.DSFWAK.A                  | 1            | DBNL_HUMAN           |
| Q9UJU6                                                    | 2             | 3.4382           | R.NEQESAVHPR.E              | 3            | DBNL_HUMAN           |
| Q9UJU6                                                    | 3             | 6.7982           | R.VVTEKSPTDWALFTYEGNSNDIR.V | 4            | DBNL_HUMAN           |
| Q9UJU6                                                    | 2             | 4.0083           | R.YQEQQGEASPQR.T            | 6            | DBNL_HUMAN           |
| Q9UJU6                                                    | 3             | 4.1155           | R.VAGTGEGGLEEMVEELNSGK.V    | 1            | DBNL_HUMAN           |
| Q9UJU6                                                    | 2             | 4.6793           | R.VAGTGEGGLEEM#VEELNSGK.V   | 6            | DBNL_HUMAN           |
| Q9UJU6                                                    | 2             | 4.6521           | R.TWEQQQEVVSR.N             | 7            | DBNL_HUMAN           |
| Q9UJU6                                                    | 3             | 5.1162           | R.NRNEQESAVHPR.E            | 9            | DBNL_HUMAN           |
| Q9UJU6                                                    | 2             | 3.8678           | R.NGPALQEAYVR.V             | 5            | DBNL_HUMAN           |
| <b><i>Dynactin 2 variant - Homo sapiens (Human)</i></b>   |               |                  |                             |              |                      |
| Q53H88                                                    | 2             | 4.091            | K.LLGPDAAINLTPDGALAK.R      | 1            | Q53H88_HUMAN         |
| Q53H88                                                    | 2             | 4.3261           | K.ESATEEKLTPLVLLAK.Q        | 2            | Q53H88_HUMAN         |
| Q53H88                                                    | 2             | 3.5732           | K.ASVEDADTQSK.V             | 5            | Q53H88_HUMAN         |
| Q53H88                                                    | 2             | 4.5913           | K.LLGPDAAINLTPDGALAKR.L     | 1            | Q53H88_HUMAN         |
| Q53H88                                                    | 2             | 3.3911           | K.RLLQLLEATK.N              | 2            | Q53H88_HUMAN         |
| Q53H88                                                    | 2             | 4.7111           | R.LLHEVQELTTEVEK.I          | 4            | Q53H88_HUMAN         |
| Q53H88                                                    | 2             | 4.6162           | R.WSPIASTLPELVQR.L          | 6            | Q53H88_HUMAN         |
| Q53H88                                                    | 3             | 3.8992           | R.TGYESGEYEMLGEGLVKQK.Y     | 1            | Q53H88_HUMAN         |
| Q53H88                                                    | 2             | 3.612            | R.TGYESGEYEM#LGEGLGVK.E     | 1            | Q53H88_HUMAN         |
| Q53H88                                                    | 2             | 3.5869           | R.LTELETAVR.C               | 2            | Q53H88_HUMAN         |
| Q53H88                                                    | 2             | 2.9033           | K.RLTELETAVR.C              | 1            | Q53H88_HUMAN         |
| Q53H88                                                    | 2             | 2.7328           | K.TTVKESATEEK.L             | 1            | Q53H88_HUMAN         |
| Q53H88                                                    | 3             | 3.8374           | R.LLHEVQELTTEVEKIK.T        | 1            | Q53H88_HUMAN         |

| <i>Accession No*</i>                                                                | <i>Charge</i> | <i>XC(Max)**</i> | <i>Peptide*</i>           | <i>TC***</i> | <i>Reference No*</i> |
|-------------------------------------------------------------------------------------|---------------|------------------|---------------------------|--------------|----------------------|
| Q53H88                                                                              | 3             | 3.9123           | K.TTVKESATEEKLTPVLLAK.Q   | 1            | Q53H88_HUMAN         |
| Q53H88                                                                              | 2             | 4.132            | K.VSALDLAVLDQVEAR.L       | 2            | Q53H88_HUMAN         |
| Q53H88                                                                              | 2             | 3.312            | K.YADLPGIAR.N             | 2            | Q53H88_HUMAN         |
| Q53H88                                                                              | 2             | 3.0159           | R.ENLATVEGNFASIDER.M      | 1            | Q53H88_HUMAN         |
| <b><i>Dynamin-binding protein - Homo sapiens (Human)</i></b>                        |               |                  |                           |              |                      |
| Q6XZF7                                                                              | 2             | 3.5101           | R.SGDSADVAR.D             | 3            | DNMBP_HUMAN          |
| <b><i>Dysbindin - Homo sapiens (Human)</i></b>                                      |               |                  |                           |              |                      |
| Q96EV8                                                                              | 3             | 3.7036           | K.HM#QSQQLENYKK.N         | 1            | DTBP1_HUMAN          |
| <b><i>Dystroglycan precursor - Homo sapiens (Human)</i></b>                         |               |                  |                           |              |                      |
| Q14118                                                                              | 2             | 2.7901           | R.GGEPNQRPELK.N           | 2            | DAG1_HUMAN           |
| Q14118                                                                              | 2             | 3.5074           | K.ATSITVTGSGSCR.H         | 4            | DAG1_HUMAN           |
| Q14118                                                                              | 2             | 3.0613           | K.LREQQLVGEK.S            | 3            | DAG1_HUMAN           |
| Q14118                                                                              | 2             | 3.7763           | R.HLQFIPVPPR.R            | 5            | DAG1_HUMAN           |
| Q14118                                                                              | 2             | 3.4972           | R.IAEDDGKPRPAFSNALEPDFK.A | 2            | DAG1_HUMAN           |
| Q14118                                                                              | 3             | 4.2893           | K.IPSDTFYDHEDTTTDLK.L     | 2            | DAG1_HUMAN           |
| <b><i>E1A-binding protein p400 - Homo sapiens (Human)</i></b>                       |               |                  |                           |              |                      |
| Q96L91                                                                              | 3             | 4.9367           | R.HQPASASSTAASPAHPAK.L    | 1            | EP400_HUMAN          |
| <b><i>E3 SUMO-protein ligase CBX4 - Homo sapiens (Human)</i></b>                    |               |                  |                           |              |                      |
| O00257                                                                              | 2             | 3.6921           | K.SGEVAEGEAR.S            | 2            | CBX4_HUMAN           |
| <b><i>E3 SUMO-protein ligase RanBP2 - Homo sapiens (Human)</i></b>                  |               |                  |                           |              |                      |
| P49792                                                                              | 2             | 2.7414           | K.EIDTDSTSQGESK.I         | 1            | RBP2_HUMAN           |
| P49792                                                                              | 2             | 2.884            | K.FGNTEQGFK.F             | 1            | RBP2_HUMAN           |
| <b><i>E3 ubiquitin-protein ligase CBL - Homo sapiens (Human)</i></b>                |               |                  |                           |              |                      |
| P22681                                                                              | 2             | 3.2943           | K.VPVSAPSSSDPWTGR.E       | 2            | CBL_HUMAN            |
| <b><i>E3 ubiquitin-protein ligase HECW2 - Homo sapiens (Human)</i></b>              |               |                  |                           |              |                      |
| Q9P2P5                                                                              | 2             | 3.1689           | R.ADDGSLTSQTK.L           | 2            | HECW2_HUMAN          |
| <b><i>E3 ubiquitin-protein ligase NEDD4 - Homo sapiens (Human)</i></b>              |               |                  |                           |              |                      |
| P46934                                                                              | 2             | 2.9297           | R.SYYVDHNSR.T             | 1            | NEDD4_HUMAN          |
| <b><i>E3 ubiquitin-protein ligase NEDD4-like protein - Homo sapiens (Human)</i></b> |               |                  |                           |              |                      |
| Q96PU5                                                                              | 2             | 4.554            | R.SLSSPTVTL SAPLEGA.K.D   | 2            | NED4L_HUMAN          |
| <b><i>E3 ubiquitin-protein ligase Praja2 - Homo sapiens (Human)</i></b>             |               |                  |                           |              |                      |
| O43164                                                                              | 2             | 4.0031           | R.YQESLGNTVFELENR.E       | 4            | PJA2_HUMAN           |
| O43164                                                                              | 2             | 2.8834           | R.SSQDEM#VSTK.Q           | 2            | PJA2_HUMAN           |
| O43164                                                                              | 2             | 3.2125           | R.SSQDEMVSTK.Q            | 2            | PJA2_HUMAN           |
| O43164                                                                              | 2             | 3.1572           | R.ETENNQM#TSESGATAGR.Q    | 2            | PJA2_HUMAN           |

| <i>Accession No*</i>                                                                  | <i>Charge</i> | <i>XC(Max)**</i> | <i>Peptide*</i>                   | <i>TC***</i> | <i>Reference No*</i> |
|---------------------------------------------------------------------------------------|---------------|------------------|-----------------------------------|--------------|----------------------|
| <b><i>E3 ubiquitin-protein ligase RING2 - Homo sapiens (Human)</i></b>                |               |                  |                                   |              |                      |
| Q99496                                                                                | 2             | 2.8937           | R.PHPTLMEKDDSAQTR.Y               | 1            | RING2_HUMAN          |
| <b><i>Early endosome antigen 1 - Homo sapiens (Human)</i></b>                         |               |                  |                                   |              |                      |
| Q15075                                                                                | 3             | 6.1463           | R.ADLQNHLDTAQNALQDKQQELNK.I       | 3            | EEA1_HUMAN           |
| Q15075                                                                                | 2             | 3.9009           | K.QQHQQEQALQQSTTAK.L              | 3            | EEA1_HUMAN           |
| Q15075                                                                                | 2             | 2.9556           | K.SEFEKENQK.G                     | 3            | EEA1_HUMAN           |
| Q15075                                                                                | 2             | 3.0756           | K.SLGSADLQFK.H                    | 2            | EEA1_HUMAN           |
| Q15075                                                                                | 2             | 2.7096           | K.SSVNELTQK.N                     | 1            | EEA1_HUMAN           |
| Q15075                                                                                | 3             | 4.7556           | K.TKQQHQEQALQQSTTAK.L             | 1            | EEA1_HUMAN           |
| Q15075                                                                                | 2             | 4.862            | K.LSLAQEDLISNR.N                  | 4            | EEA1_HUMAN           |
| Q15075                                                                                | 3             | 6.2026           | R.DDVTLRQEVQDLQASLKEEK.W          | 3            | EEA1_HUMAN           |
| Q15075                                                                                | 2             | 2.972            | R.IQTTVTELQK.V                    | 2            | EEA1_HUMAN           |
| Q15075                                                                                | 2             | 2.897            | R.NQQILKDQVK.K                    | 1            | EEA1_HUMAN           |
| Q15075                                                                                | 3             | 4.5638           | R.VLSLETSVNELNSQLNESK.E           | 1            | EEA1_HUMAN           |
| Q15075                                                                                | 3             | 6.0653           | K.TELENKLQQQLTQAAQELAAEKEK.I      | 2            | EEA1_HUMAN           |
| Q15075                                                                                | 2             | 4.3323           | K.NHTLQEQVTLTEK.L                 | 3            | EEA1_HUMAN           |
| Q15075                                                                                | 2             | 4.763            | K.LREQNDLEQVLR.Q                  | 4            | EEA1_HUMAN           |
| Q15075                                                                                | 2             | 4.1347           | K.LMDKEQQVADLQLK.L                | 2            | EEA1_HUMAN           |
| Q15075                                                                                | 2             | 3.0323           | K.KSEALESIK.Q                     | 3            | EEA1_HUMAN           |
| Q15075                                                                                | 2             | 3.0145           | K.KLEADSLEVK.A                    | 2            | EEA1_HUMAN           |
| Q15075                                                                                | 2             | 3.7736           | K.IQNLEALLQK.S                    | 4            | EEA1_HUMAN           |
| Q15075                                                                                | 2             | 3.2032           | K.IQHEELNNR.I                     | 1            | EEA1_HUMAN           |
| Q15075                                                                                | 2             | 4.8163           | K.GPQEVAVYVQELQK.L                | 1            | EEA1_HUMAN           |
| Q15075                                                                                | 2             | 4.0656           | K.ELVQVQTLMDNMTLER.E              | 2            | EEA1_HUMAN           |
| Q15075                                                                                | 2             | 5.4208           | K.ASKEQALQDLQQR.Q                 | 1            | EEA1_HUMAN           |
| Q15075                                                                                | 2             | 4.8976           | K.YLSLEQKTEEEGQIK.K               | 4            | EEA1_HUMAN           |
| Q15075                                                                                | 2             | 2.8176           | K.NIQATLHQK.D                     | 2            | EEA1_HUMAN           |
| Q15075                                                                                | 4             | 5.3051           | R.ADLQNHLDTAQNALQDKQQELNKITTQLDQV | 2            | EEA1_HUMAN           |
| <b><i>Echinoderm microtubule-associated protein-like 1 - Homo sapiens (Human)</i></b> |               |                  |                                   |              |                      |
| O00423                                                                                | 2             | 4.6569           | R.LNITEEQQAVLNR.K                 | 2            | EMAL1_HUMAN          |
| O00423                                                                                | 2             | 4.1518           | R.VQMVEDDIQLLK.S                  | 4            | EMAL1_HUMAN          |
| O00423                                                                                | 2             | 3.8087           | R.VQM#QEDDIQLLK.S                 | 1            | EMAL1_HUMAN          |
| O00423                                                                                | 3             | 5.5025           | R.RLNITEEQQAVLNR.K                | 5            | EMAL1_HUMAN          |
| O00423                                                                                | 1             | 2.466            | K.ETAVPATK.S                      | 3            | EMAL1_HUMAN          |
| O00423                                                                                | 2             | 3.0508           | K.ARPLMQTLPLR.T                   | 3            | EMAL1_HUMAN          |

| <i>Accession No*</i>                                                                      | <i>Charge</i> | <i>XC(Max)**</i> | <i>Peptide*</i>             | <i>TC***</i> | <i>Reference No*</i> |
|-------------------------------------------------------------------------------------------|---------------|------------------|-----------------------------|--------------|----------------------|
| O00423                                                                                    | 3             | 4.6489           | R.RLNITEEQQAVLNRK.G         | 2            | EMAL1_HUMAN          |
| <b><i>Echinoderm microtubule-associated protein-like 3 - Homo sapiens (Human)</i></b>     |               |                  |                             |              |                      |
| Q32P44                                                                                    | 2             | 3.3663           | R.GGKDPLSSPGGPGSR.R         | 1            | EMAL3_HUMAN          |
| <b><i>Echinoderm microtubule-associated protein-like 4 - Homo sapiens (Human)</i></b>     |               |                  |                             |              |                      |
| Q9HC35                                                                                    | 3             | 4.3502           | R.RLAISEDHVASVK.K           | 2            | EMAL4_HUMAN          |
| Q9HC35                                                                                    | 2             | 3.9521           | R.KPSHTSAVSIAGK.E           | 2            | EMAL4_HUMAN          |
| Q9HC35                                                                                    | 2             | 3.2887           | R.EKKEESHSDQSPQIR.A         | 2            | EMAL4_HUMAN          |
| Q9HC35                                                                                    | 2             | 4.1436           | R.ASPSPQPSSQPLQIHR.Q        | 5            | EMAL4_HUMAN          |
| Q9HC35                                                                                    | 2             | 2.7821           | K.SIKRPSPAEK.S              | 1            | EMAL4_HUMAN          |
| Q9HC35                                                                                    | 2             | 4.2879           | K.SHNSWENSDDSR.N            | 4            | EMAL4_HUMAN          |
| Q9HC35                                                                                    | 3             | 4.8581           | K.KEESHSDQSPQIR.A           | 5            | EMAL4_HUMAN          |
| Q9HC35                                                                                    | 2             | 3.1488           | K.AALADVLR.R                | 2            | EMAL4_HUMAN          |
| <b><i>EF-hand calcium-binding domain-containing protein 4B - Homo sapiens (Human)</i></b> |               |                  |                             |              |                      |
| Q9BSW2                                                                                    | 2             | 3.3456           | R.GDEDLGDMD#GEDEEAQFR.M     | 1            | EFC4B_HUMAN          |
| <b><i>EF-hand domain-containing protein 1 - Homo sapiens (Human)</i></b>                  |               |                  |                             |              |                      |
| Q5JVL4                                                                                    | 2             | 3.1536           | K.DPGVQELEALIDIQK.Q         | 1            | EFHC1_HUMAN          |
| <b><i>EF-hand domain-containing protein 2 - Homo sapiens (Human)</i></b>                  |               |                  |                             |              |                      |
| Q96C19                                                                                    | 2             | 3.4514           | K.AAFKELQSTFK.-             | 2            | EFHD2_HUMAN          |
| <b><i>Egl nine homolog 1 - Homo sapiens (Human)</i></b>                                   |               |                  |                             |              |                      |
| Q9GZT9                                                                                    | 3             | 4.3381           | R.AAAGGQGSAAVAEAEPGKEEPAR.S | 3            | EGLN1_HUMAN          |
| <b><i>EH domain-binding protein 1 - Homo sapiens (Human)</i></b>                          |               |                  |                             |              |                      |
| Q8NDI1                                                                                    | 2             | 2.8983           | K.AVTESSEQDM#K.S            | 1            | EHBP1_HUMAN          |
| <b><i>EH domain-binding protein 1-like protein 1 - Homo sapiens (Human)</i></b>           |               |                  |                             |              |                      |
| Q8N3D4                                                                                    | 2             | 3.9954           | R.DSGVPGLEADTTGIQVK.E       | 2            | EH1L1_HUMAN          |
| Q8N3D4                                                                                    | 3             | 4.3217           | R.HVDTKGPEATGVMPEAR.C       | 1            | EH1L1_HUMAN          |
| Q8N3D4                                                                                    | 2             | 3.5366           | R.LGPSIEDKSGDPFGR.Q         | 1            | EH1L1_HUMAN          |
| Q8N3D4                                                                                    | 3             | 3.9081           | R.LKAEEMDTEDRPEASGVDTEPR.S  | 1            | EH1L1_HUMAN          |
| <b><i>EH domain-containing protein 1 - Homo sapiens (Human)</i></b>                       |               |                  |                             |              |                      |
| Q9H4M9                                                                                    | 3             | 3.7195           | K.VKLEGHELPADLPPLVPPSKR.R   | 1            | EHD1_HUMAN           |
| Q9H4M9                                                                                    | 3             | 4.1538           | K.DKPTYDEIFYTLSPVNGK.I      | 1            | EHD1_HUMAN           |
| Q9H4M9                                                                                    | 3             | 6.7771           | K.LADVDDKGLLDDEEFALANHLIK.V | 2            | EHD1_HUMAN           |
| <b><i>EH domain-containing protein 2 - Homo sapiens (Human)</i></b>                       |               |                  |                             |              |                      |
| Q9NZN4                                                                                    | 2             | 3.9811           | K.LEGHGLPANLPR.R            | 4            | EHD2_HUMAN           |
| Q9NZN4                                                                                    | 1             | 2.3995           | K.TWMVGTK.L                 | 1            | EHD2_HUMAN           |
| Q9NZN4                                                                                    | 3             | 3.8406           | K.TWM#VGTKLPSVGLGR.I        | 1            | EHD2_HUMAN           |

| <i>Accession No*</i>                                                             | <i>Charge</i> | <i>XC(Max)**</i> | <i>Peptide*</i>                   | <i>TC***</i> | <i>Reference No*</i> |
|----------------------------------------------------------------------------------|---------------|------------------|-----------------------------------|--------------|----------------------|
| Q9NZN4                                                                           | 2             | 5.417            | K.SKYDEIFYNLAPADGK.L              | 5            | EHD2_HUMAN           |
| Q9NZN4                                                                           | 3             | 4.0314           | K.DKSKYDEIFYNLAPADGK.L            | 2            | EHD2_HUMAN           |
| Q9NZN4                                                                           | 3             | 4.0166           | K.LSDVDRDGMLDDEEFALASHLIEAK.L     | 2            | EHD2_HUMAN           |
| <b><i>EH domain-containing protein 3 - Homo sapiens (Human)</i></b>              |               |                  |                                   |              |                      |
| Q9NZN3                                                                           | 3             | 3.9274           | R.DKPMYDEIFYTLSPVDGK.I            | 1            | EHD3_HUMAN           |
| <b><i>EH domain-containing protein 4 - Homo sapiens (Human)</i></b>              |               |                  |                                   |              |                      |
| Q9H223                                                                           | 3             | 4.0219           | K.DKPVYDELPHYTLSPINGK.I           | 1            | EHD4_HUMAN           |
| <b><i>EHMT1 protein - Homo sapiens (Human)</i></b>                               |               |                  |                                   |              |                      |
| Q86X08                                                                           | 2             | 3.4825           | K.TELLGEETPMAADEGSAEK.Q           | 2            | Q86X08_HUMAN         |
| <b><i>EIF4G1 variant protein - Homo sapiens (Human)</i></b>                      |               |                  |                                   |              |                      |
| Q4LE58                                                                           | 2             | 2.7887           | K.SDQWKPLNLEEK.K                  | 1            | Q4LE58_HUMAN         |
| Q4LE58                                                                           | 1             | 2.9128           | R.GPAGLGPR.R                      | 4            | Q4LE58_HUMAN         |
| <b><i>ELAV-like protein 1 - Homo sapiens (Human)</i></b>                         |               |                  |                                   |              |                      |
| Q15717                                                                           | 2             | 3.4751           | R.VLVDQTTGLSR.G                   | 2            | ELAV1_HUMAN          |
| <b><i>Electron transfer flavoprotein subunit beta - Homo sapiens (Human)</i></b> |               |                  |                                   |              |                      |
| P38117                                                                           | 2             | 3.6229           | K.IEVIKPGDLGVDLTSK.L              | 1            | ETFB_HUMAN           |
| P38117                                                                           | 2             | 3.1244           | K.LSVISVEDPPQR.T                  | 1            | ETFB_HUMAN           |
| <b><i>ELKS/RAB6-interacting/CAST family member 1 - Homo sapiens (Human)</i></b>  |               |                  |                                   |              |                      |
| Q8IUD2                                                                           | 2             | 4.5141           | R.DNTIMDLQTQLK.E                  | 7            | RB6I2_HUMAN          |
| Q8IUD2                                                                           | 3             | 4.0268           | K.TLSMENIQLSNAAYATSGPM#YLSDHENVGS | 2            | RB6I2_HUMAN          |
| Q8IUD2                                                                           | 2             | 3.5882           | R.SVGKVEPSSQSPGR.S                | 2            | RB6I2_HUMAN          |
| Q8IUD2                                                                           | 3             | 3.9326           | K.LSSTQQSLAEKETHLTNLR.A           | 1            | RB6I2_HUMAN          |
| Q8IUD2                                                                           | 1             | 2.5024           | K.LSSSMNSIK.T                     | 2            | RB6I2_HUMAN          |
| Q8IUD2                                                                           | 2             | 3.3866           | K.LMADNYEDDHF.K.S                 | 2            | RB6I2_HUMAN          |
| Q8IUD2                                                                           | 3             | 3.9834           | K.KTQEEVAALKR.E                   | 1            | RB6I2_HUMAN          |
| Q8IUD2                                                                           | 2             | 2.7578           | K.KAHEAALEAR.A                    | 1            | RB6I2_HUMAN          |
| Q8IUD2                                                                           | 2             | 3.195            | K.ALQTVIEMKDSK.I                  | 1            | RB6I2_HUMAN          |
| Q8IUD2                                                                           | 2             | 4.4655           | K.AAGLQAEIGQVK.Q                  | 3            | RB6I2_HUMAN          |
| Q8IUD2                                                                           | 2             | 3.6066           | R.GLTPPASYNLDDDQAAWENELQK.M       | 3            | RB6I2_HUMAN          |
| Q8IUD2                                                                           | 2             | 4.3215           | R.DLNQLFQQDSSSR.T                 | 2            | RB6I2_HUMAN          |
| Q8IUD2                                                                           | 2             | 2.8244           | R.EMVLAQEESAR.T                   | 1            | RB6I2_HUMAN          |
| Q8IUD2                                                                           | 2             | 3.0534           | R.DNTIM#DLQTQLK.E                 | 1            | RB6I2_HUMAN          |
| Q8IUD2                                                                           | 3             | 4.8411           | R.TNAEKQVEELLMAMEK.V              | 2            | RB6I2_HUMAN          |
| Q8IUD2                                                                           | 2             | 3.2928           | R.GLRDLEEEIQM#LK.S                | 1            | RB6I2_HUMAN          |
| Q8IUD2                                                                           | 2             | 3.2751           | K.SAQMLEAR.R                      | 1            | RB6I2_HUMAN          |

| <i>Accession No*</i>                                          | <i>Charge</i> | <i>XC(Max)**</i> | <i>Peptide*</i>                    | <i>TC***</i> | <i>Reference No*</i> |
|---------------------------------------------------------------|---------------|------------------|------------------------------------|--------------|----------------------|
| Q8IUD2                                                        | 3             | 5.0717           | K.SNGALSTEEREEEMKQMEVYR.S          | 2            | RB6I2_HUMAN          |
| Q8IUD2                                                        | 3             | 5.1703           | K.TLSM#ENIQSLNAAAYATSGPM#YLSDHENVG | 1            | RB6I2_HUMAN          |
| Q8IUD2                                                        | 3             | 5.4708           | K.TLSM#ENIQSLNAAAYATSGPMYLSDHENVGS | 2            | RB6I2_HUMAN          |
| Q8IUD2                                                        | 2             | 4.8897           | K.NKVEQLKEELSSK.E                  | 1            | RB6I2_HUMAN          |
| Q8IUD2                                                        | 4             | 4.749            | K.VSLLQGDLSEKEASLLDLKEHASSLASSGLK. | 1            | RB6I2_HUMAN          |
| Q8IUD2                                                        | 2             | 5.0188           | R.TNSTGGSSGSSVGGGSGK.T             | 13           | RB6I2_HUMAN          |
| Q8IUD2                                                        | 3             | 3.9001           | R.KDTELLALQTKLETLTNQFSDSK.Q        | 2            | RB6I2_HUMAN          |
| Q8IUD2                                                        | 2             | 4.9889           | R.GLRDLEEEIQMLK.S                  | 3            | RB6I2_HUMAN          |
| <b><i>Elongation factor 1-beta - Homo sapiens (Human)</i></b> |               |                  |                                    |              |                      |
| P24534                                                        | 1             | 2.5172           | R.LAQYESK.K                        | 3            | EF1B_HUMAN           |
| P24534                                                        | 2             | 3.0892           | R.LAQYESKK.A                       | 7            | EF1B_HUMAN           |
| <b><i>Elongation factor 2 - Homo sapiens (Human)</i></b>      |               |                  |                                    |              |                      |
| P13639                                                        | 2             | 3.6136           | K.EGIPALDNFLDKL.-                  | 6            | EF2_HUMAN            |
| <b><i>EMILIN-1 precursor - Homo sapiens (Human)</i></b>       |               |                  |                                    |              |                      |
| Q9Y6C2                                                        | 3             | 4.3337           | R.LGQLEGLLQAHGDEGCGACGGVQEELGR.L   | 1            | EMIL1_HUMAN          |
| Q9Y6C2                                                        | 2             | 3.5396           | R.LDTVAGGLQGLR.E                   | 2            | EMIL1_HUMAN          |
| Q9Y6C2                                                        | 2             | 3.096            | R.QATLEGLQEIVGR.L                  | 1            | EMIL1_HUMAN          |
| Q9Y6C2                                                        | 2             | 3.5431           | R.VLLNDGGYYDPETGVFTAPLAGR.Y        | 3            | EMIL1_HUMAN          |
| Q9Y6C2                                                        | 2             | 3.5652           | R.APAPASAPPGPSEELLR.Q              | 2            | EMIL1_HUMAN          |
| <b><i>EMILIN-2 precursor - Homo sapiens (Human)</i></b>       |               |                  |                                    |              |                      |
| Q9BXX0                                                        | 2             | 4.1905           | R.KFQETEQTQIK.L                    | 1            | EMIL2_HUMAN          |
| Q9BXX0                                                        | 2             | 5.6764           | R.TVLDLQSSLAGVSENLK.H              | 3            | EMIL2_HUMAN          |
| <b><i>Ena/VASP-like protein - Homo sapiens (Human)</i></b>    |               |                  |                                    |              |                      |
| Q9UI08                                                        | 3             | 4.0261           | R.RVQRPEDASGGSSPSGTSK.S            | 1            | EVL_HUMAN            |
| Q9UI08                                                        | 2             | 3.6247           | K.SPLQSQPHSR.M                     | 2            | EVL_HUMAN            |
| Q9UI08                                                        | 2             | 3.5258           | K.EDESQM#EDPSTSPSPGTR.A            | 1            | EVL_HUMAN            |
| Q9UI08                                                        | 2             | 5.6504           | K.KEDESQMEDPSTSPSPGTR.A            | 2            | EVL_HUMAN            |
| Q9UI08                                                        | 2             | 4.0587           | R.MKQEILEEVVR.E                    | 2            | EVL_HUMAN            |
| Q9UI08                                                        | 2             | 4.4077           | R.VQRPEDASGGSSPSGTSK.S             | 3            | EVL_HUMAN            |
| Q9UI08                                                        | 2             | 3.9934           | R.ASSGGGGGGLMEEMNK.L               | 2            | EVL_HUMAN            |
| <b><i>Endoglin precursor - Homo sapiens (Human)</i></b>       |               |                  |                                    |              |                      |
| P17813                                                        | 2             | 3.2629           | R.GEVTYTTSQVSK.G                   | 2            | EGLN_HUMAN           |
| P17813                                                        | 2             | 3.0332           | K.TQILEWAAER.G                     | 2            | EGLN_HUMAN           |
| <b><i>Endomucin precursor - Homo sapiens (Human)</i></b>      |               |                  |                                    |              |                      |
| Q9ULC0                                                        | 2             | 3.7493           | K.TISHESGEHSAQGK.T                 | 2            | MUCEN_HUMAN          |

| <i>Accession No*</i>                                                                        | <i>Charge</i> | <i>XC(Max)**</i> | <i>Peptide*</i>                  | <i>TC***</i> | <i>Reference No*</i> |
|---------------------------------------------------------------------------------------------|---------------|------------------|----------------------------------|--------------|----------------------|
| <b><i>Endoplasmic reticulum protein ERp29 precursor - Homo sapiens (Human)</i></b>          |               |                  |                                  |              |                      |
| P30040                                                                                      | 2             | 3.7959           | K.GALPLDVTIFYK.V                 | 4            | ERP29_HUMAN          |
| P30040                                                                                      | 2             | 3.1453           | K.FDTQYPYGEK.Q                   | 2            | ERP29_HUMAN          |
| P30040                                                                                      | 2             | 4.2809           | K.SLNILTAFAQK.K                  | 6            | ERP29_HUMAN          |
| P30040                                                                                      | 3             | 4.5062           | K.YKLDKESYPVFYLF.R.D             | 8            | ERP29_HUMAN          |
| P30040                                                                                      | 2             | 4.8139           | K.ILDQGEDFPASEMTR.I              | 7            | ERP29_HUMAN          |
| P30040                                                                                      | 2             | 3.007            | K.KGAEEKEEL.-                    | 1            | ERP29_HUMAN          |
| P30040                                                                                      | 2             | 3.3386           | K.MSDGKKEELQK.S                  | 3            | ERP29_HUMAN          |
| P30040                                                                                      | 2             | 3.4889           | K.SLNILTAFAQK.K.G                | 2            | ERP29_HUMAN          |
| <b><i>Endoplasmic precursor - Homo sapiens (Human)</i></b>                                  |               |                  |                                  |              |                      |
| P14625                                                                                      | 3             | 6.2868           | R.FQSSHHPTDITSLDQYVER.M          | 2            | ENPL_HUMAN           |
| P14625                                                                                      | 3             | 5.0935           | R.EAVEKEFEPLLNWM#KDK.A           | 1            | ENPL_HUMAN           |
| P14625                                                                                      | 2             | 3.4139           | R.EAVEKEFEPLLNWMK.D              | 1            | ENPL_HUMAN           |
| P14625                                                                                      | 3             | 4.5919           | R.EAVEKEFEPLLNWMKDK.A            | 4            | ENPL_HUMAN           |
| P14625                                                                                      | 2             | 3.4901           | R.KEAESSPFVER.L                  | 1            | ENPL_HUMAN           |
| P14625                                                                                      | 2             | 3.8154           | R.LISLTDENALSGNEELTVK.I          | 1            | ENPL_HUMAN           |
| P14625                                                                                      | 3             | 3.9515           | R.RVFITDDFDHDM#MPK.Y             | 1            | ENPL_HUMAN           |
| P14625                                                                                      | 2             | 3.4832           | K.SILFVPTSAPR.G                  | 5            | ENPL_HUMAN           |
| P14625                                                                                      | 2             | 3.6062           | R.SGYLLPDTK.A                    | 8            | ENPL_HUMAN           |
| P14625                                                                                      | 2             | 2.7367           | K.FDESEKTK.E                     | 1            | ENPL_HUMAN           |
| P14625                                                                                      | 3             | 4.0159           | R.RVFITDDFDHDMMPK.Y              | 1            | ENPL_HUMAN           |
| P14625                                                                                      | 2             | 3.1699           | K.EAESSPFVER.L                   | 2            | ENPL_HUMAN           |
| P14625                                                                                      | 3             | 4.1275           | K.KYSQFINFPIYVWSSK.T             | 2            | ENPL_HUMAN           |
| P14625                                                                                      | 2             | 3.8919           | K.DISTNYYASQK.K.T                | 4            | ENPL_HUMAN           |
| P14625                                                                                      | 2             | 2.9104           | K.SGTSEFLNK.M                    | 1            | ENPL_HUMAN           |
| P14625                                                                                      | 2             | 2.9219           | K.EGVKFDSEKTK.E                  | 1            | ENPL_HUMAN           |
| P14625                                                                                      | 2             | 3.7018           | K.EVEEDEYKAFYK.S                 | 2            | ENPL_HUMAN           |
| P14625                                                                                      | 2             | 3.1116           | K.FAFQAEVNR.M                    | 2            | ENPL_HUMAN           |
| P14625                                                                                      | 3             | 5.0253           | K.IADDKYNDTFWKEFGTNIK.L          | 2            | ENPL_HUMAN           |
| P14625                                                                                      | 2             | 3.4606           | K.LIINSLYK.N                     | 2            | ENPL_HUMAN           |
| P14625                                                                                      | 2             | 4.2357           | K.NLLHVTDGTGVMTR.E               | 1            | ENPL_HUMAN           |
| P14625                                                                                      | 2             | 3.8437           | K.DISTNYYASQK.K                  | 3            | ENPL_HUMAN           |
| <b><i>Endothelial cell-selective adhesion molecule precursor - Homo sapiens (Human)</i></b> |               |                  |                                  |              |                      |
| Q96AP7                                                                                      | 3             | 3.9931           | R.ALRPHPGPPRPGALTPPSLSSQALPSPR.L | 1            | ESAM_HUMAN           |
| Q96AP7                                                                                      | 2             | 6.1994           | R.LPTTDGAHPQPISPIPGGVSSGLSR.M    | 8            | ESAM_HUMAN           |



| <i>Accession No*</i>                                                                | <i>Charge</i> | <i>XC(Max)**</i> | <i>Peptide*</i>                   | <i>TC***</i> | <i>Reference No*</i> |
|-------------------------------------------------------------------------------------|---------------|------------------|-----------------------------------|--------------|----------------------|
| Q96AP7                                                                              | 2             | 3.5563           | R.QLPSFQTFAPALDVIR.G              | 1            | ESAM_HUMAN           |
| <b><i>Endothelial cell-specific molecule 1 precursor - Homo sapiens (Human)</i></b> |               |                  |                                   |              |                      |
| Q9NQ30                                                                              | 2             | 2.86             | K.FPFFQYSVTK.S                    | 1            | ESM1_HUMAN           |
| <b><i>Endothelial differentiation-related factor 1 - Homo sapiens (Human)</i></b>   |               |                  |                                   |              |                      |
| O60869                                                                              | 3             | 5.9267           | K.INEKPVVIADYESGR.A               | 13           | EDF1_HUMAN           |
| O60869                                                                              | 2             | 3.3416           | R.ETEELHHDRVTLEV GK.V             | 2            | EDF1_HUMAN           |
| O60869                                                                              | 2             | 3.1471           | R.ETEELHHDR.V                     | 1            | EDF1_HUMAN           |
| <b><i>Enhancer of mRNA-decapping protein 3 - Homo sapiens (Human)</i></b>           |               |                  |                                   |              |                      |
| Q96F86                                                                              | 2             | 3.9524           | K.KPASSSSAPQNI PK.R               | 1            | EDC3_HUMAN           |
| <b><i>Enhancer of rudimentary homolog - Homo sapiens (Human)</i></b>                |               |                  |                                   |              |                      |
| P84090                                                                              | 2             | 2.9632           | R.ADTQTYQPYNKDWIK.E               | 2            | ERH_HUMAN            |
| <b><i>Enigma homolog - Homo sapiens (Human)</i></b>                                 |               |                  |                                   |              |                      |
| Q59FC9                                                                              | 3             | 5.7183           | R.ISNSATYSGSVAPANSALGQTQPSDQDTLVQ | 1            | Q59FC9_HUMA          |
| <b><i>Ensconsin - Homo sapiens (Human)</i></b>                                      |               |                  |                                   |              |                      |
| Q14244                                                                              | 2             | 3.9444           | R.LSSSSATLLNSPDR.A                | 2            | MAP7_HUMAN           |
| Q14244                                                                              | 2             | 2.7216           | R.VREEAERVR.Q                     | 1            | MAP7_HUMAN           |
| Q14244                                                                              | 2             | 3.2344           | R.SETAPDSYKVQDK.K                 | 2            | MAP7_HUMAN           |
| Q14244                                                                              | 2             | 3.6313           | R.RLEAEQAR.E                      | 8            | MAP7_HUMAN           |
| Q14244                                                                              | 2             | 3.0399           | R.RAVSPSNPK.A                     | 1            | MAP7_HUMAN           |
| Q14244                                                                              | 2             | 2.8097           | R.EIVWLEREER.A                    | 2            | MAP7_HUMAN           |
| Q14244                                                                              | 3             | 5.1962           | R.APLVKVEEATVEER.T                | 4            | MAP7_HUMAN           |
| Q14244                                                                              | 2             | 2.7463           | R.ALREEREAER.A                    | 2            | MAP7_HUMAN           |
| Q14244                                                                              | 2             | 3.6432           | K.VEEATVEER.T                     | 4            | MAP7_HUMAN           |
| Q14244                                                                              | 2             | 3.8386           | K.TSAGTTDPEEATR.L                 | 6            | MAP7_HUMAN           |
| Q14244                                                                              | 2             | 3.6844           | K.STAALSGEAASCSPIMPYK.A           | 1            | MAP7_HUMAN           |
| Q14244                                                                              | 3             | 4.4875           | K.GRAPLVKVEEATVEER.T              | 2            | MAP7_HUMAN           |
| Q14244                                                                              | 2             | 3.0562           | R.REQEELER.Q                      | 3            | MAP7_HUMAN           |
| <b><i>Envoplakin - Homo sapiens (Human)</i></b>                                     |               |                  |                                   |              |                      |
| Q92817                                                                              | 2             | 3.1377           | R.ILQQDWS DLM#ADPAGVRR.E          | 1            | EVPL_HUMAN           |
| <b><i>Eosinophil cationic protein precursor - Homo sapiens (Human)</i></b>          |               |                  |                                   |              |                      |
| P12724                                                                              | 2             | 4.3282           | R.YPVVPHLDTTI.-                   | 3            | ECP_HUMAN            |
| <b><i>Ephrin-B2 precursor - Homo sapiens (Human)</i></b>                            |               |                  |                                   |              |                      |
| P52799                                                                              | 2             | 4.3989           | K.FQEFSPNLWGLEFQK.N               | 3            | EFNB2_HUMAN          |
| P52799                                                                              | 2             | 2.7946           | K.TVGQY EYYK.V                    | 1            | EFNB2_HUMAN          |
| P52799                                                                              | 2             | 4.6252           | K.VGQDASSAGSTR.N                  | 5            | EFNB2_HUMAN          |

| <i>Accession No*</i>                                                                                    | <i>Charge</i> | <i>XC(Max)**</i> | <i>Peptide*</i>                    | <i>TC***</i> | <i>Reference No*</i> |
|---------------------------------------------------------------------------------------------------------|---------------|------------------|------------------------------------|--------------|----------------------|
| <b><i>Epidermal growth factor receptor kinase substrate 8 - Homo sapiens (Human)</i></b>                |               |                  |                                    |              |                      |
| Q12929                                                                                                  | 3             | 5.2236           | R.KSQMEEVQDELIHR.L                 | 2            | EPS8_HUMAN           |
| Q12929                                                                                                  | 3             | 4.2974           | R.GSHLDQGEAAVAFKPTSNR.H            | 2            | EPS8_HUMAN           |
| Q12929                                                                                                  | 3             | 5.6053           | R.MEYGRPADTPPAPSPPTPAPVPVPLPST     | 1            | EPS8_HUMAN           |
| Q12929                                                                                                  | 2             | 5.3844           | K.ISAAASDSGVESFDEGSSH.-            | 11           | EPS8_HUMAN           |
| Q12929                                                                                                  | 3             | 4.9888           | K.AALEDSSGSSELQEIM#R.R             | 1            | EPS8_HUMAN           |
| Q12929                                                                                                  | 2             | 3.577            | R.QNSSSSDSGGSIVR.D                 | 3            | EPS8_HUMAN           |
| Q12929                                                                                                  | 2             | 4.5885           | K.SQMEEVQDELIHR.L                  | 2            | EPS8_HUMAN           |
| <b><i>Epidermal growth factor receptor kinase substrate 8-like protein 2 - Homo sapiens (Human)</i></b> |               |                  |                                    |              |                      |
| Q9H6S3                                                                                                  | 2             | 2.9855           | K.QQSGSELEELMNK.F                  | 1            | ES8L2_HUMAN          |
| Q9H6S3                                                                                                  | 2             | 5.1303           | R.SQPVSQPLTYESGPDEVR.A             | 4            | ES8L2_HUMAN          |
| Q9H6S3                                                                                                  | 2             | 3.1639           | R.VYSQLTM#QK.A                     | 2            | ES8L2_HUMAN          |
| Q9H6S3                                                                                                  | 2             | 3.3187           | R.VYSQLTMQK.A                      | 4            | ES8L2_HUMAN          |
| <b><i>Epidermal growth factor receptor precursor - Homo sapiens (Human)</i></b>                         |               |                  |                                    |              |                      |
| P00533                                                                                                  | 3             | 4.7781           | K.GSHQISLDNPDYQQDFFPK.E            | 5            | EGFR_HUMAN           |
| P00533                                                                                                  | 2             | 3.5694           | K.GSTAENAEYLR.V                    | 3            | EGFR_HUMAN           |
| <b><i>Epithelial protein lost in neoplasm beta variant - Homo sapiens (Human)</i></b>                   |               |                  |                                    |              |                      |
| Q59FE8                                                                                                  | 2             | 3.4901           | R.STPAEDDSPGDSQVK.S                | 5            | Q59FE8_HUMAN         |
| <b><i>EPRS protein - Homo sapiens (Human)</i></b>                                                       |               |                  |                                    |              |                      |
| A0AVA9                                                                                                  | 2             | 2.7716           | K.SLYDEVAQAQGEVVR.K                | 1            | A0AVA9_HUMA          |
| A0AVA9                                                                                                  | 3             | 4.9566           | K.TGQEYKPGNPPAEIQGNISSNSSASILESK.S | 1            | A0AVA9_HUMA          |
| A0AVA9                                                                                                  | 2             | 3.3838           | K.INEAVECLLSLK.A                   | 2            | A0AVA9_HUMA          |
| A0AVA9                                                                                                  | 3             | 4.5347           | K.APKDQVDIAVQELLQLK.A              | 2            | A0AVA9_HUMA          |
| A0AVA9                                                                                                  | 2             | 3.1727           | R.DQDLEPGAPSM#GAK.S                | 2            | A0AVA9_HUMA          |
| A0AVA9                                                                                                  | 2             | 2.9538           | K.NQGGGLSSSGAGEGQGPKK.Q            | 1            | A0AVA9_HUMA          |
| <b><i>Epsin-1 - Homo sapiens (Human)</i></b>                                                            |               |                  |                                    |              |                      |
| Q9Y6I3                                                                                                  | 3             | 5.1256           | K.TPESFLGPNAALVDLDSLVRPGTPPGAK.A   | 5            | EPN1_HUMAN           |
| Q9Y6I3                                                                                                  | 3             | 4.5772           | R.KTPESFLGPNAALVDLDSLVRPGTPPGAK.   | 2            | EPN1_HUMAN           |
| Q9Y6I3                                                                                                  | 2             | 4.0805           | R.TALPTSGSSAGELELLAGEVPAR.S        | 1            | EPN1_HUMAN           |
| <b><i>ERO1-like protein alpha precursor - Homo sapiens (Human)</i></b>                                  |               |                  |                                    |              |                      |
| Q96HE7                                                                                                  | 2             | 4.6539           | R.LGAVDESLSSEETQK.A                | 2            | ERO1A_HUMAN          |
| <b><i>Erythrocyte membrane protein band 4.1 like 5 - Homo sapiens (Human)</i></b>                       |               |                  |                                    |              |                      |
| Q7Z5S1                                                                                                  | 3             | 4.1449           | R.LPGLGEPEVEYETLKDTSEK.L           | 2            | Q7Z5S1_HUMAN         |
| <b><i>ESF1 homolog - Homo sapiens (Human)</i></b>                                                       |               |                  |                                    |              |                      |
| Q9H501                                                                                                  | 2             | 3.5838           | K.DGTSPEEEIEIER.Q                  | 3            | ESF1_HUMAN           |

| <i>Accession No*</i>                                                                       | <i>Charge</i> | <i>XC(Max)**</i> | <i>Peptide*</i>          | <i>TC***</i> | <i>Reference No*</i> |
|--------------------------------------------------------------------------------------------|---------------|------------------|--------------------------|--------------|----------------------|
| <b><i>Espin. - Homo sapiens (Human)</i></b>                                                |               |                  |                          |              |                      |
| Q5T8W7                                                                                     | 2             | 3.2259           | K.SFNMMSPTGDNSELLAEIK.A  | 1            | Q5T8W7_HUMA          |
| Q5T8W7                                                                                     | 2             | 3.4236           | K.SFNM#MSPTGDNSELLAEIK.A | 1            | Q5T8W7_HUMA          |
| <b><i>Ester hydrolase C11orf54 - Homo sapiens (Human)</i></b>                              |               |                  |                          |              |                      |
| Q9H0W9                                                                                     | 2             | 4.9755           | R.IAEVGGVPYLLPLVNQK.K    | 7            | CK054_HUMAN          |
| <b><i>Eukaryotic translation initiation factor 2 subunit 1 - Homo sapiens (Human)</i></b>  |               |                  |                          |              |                      |
| P05198                                                                                     | 2             | 3.3056           | K.VVTDTDDELAR.Q          | 3            | IF2A_HUMAN           |
| P05198                                                                                     | 2             | 3.0302           | R.GVFNVMPEPK.V           | 1            | IF2A_HUMAN           |
| P05198                                                                                     | 2             | 4.9516           | R.TEGLSVLSQAMAVIK.E      | 3            | IF2A_HUMAN           |
| <b><i>Eukaryotic translation initiation factor 2 subunit 2 - Homo sapiens (Human)</i></b>  |               |                  |                          |              |                      |
| P20042                                                                                     | 2             | 2.8306           | K.IESDVQEPTPEDDLIMLGNK.K | 1            | IF2B_HUMAN           |
| P20042                                                                                     | 2             | 3.9972           | K.DASDDLDDLNFFNQK.K      | 1            | IF2B_HUMAN           |
| P20042                                                                                     | 2             | 3.8543           | K.IFDIDEAEEGVKDLK.I      | 1            | IF2B_HUMAN           |
| P20042                                                                                     | 2             | 4.2417           | K.KIFDIDEAEEGVK.D        | 2            | IF2B_HUMAN           |
| P20042                                                                                     | 3             | 3.7039           | K.KIFDIDEAEEGVKDLK.I     | 1            | IF2B_HUMAN           |
| P20042                                                                                     | 3             | 4.7028           | R.KKDASDDLDDLNFFNQK.K    | 3            | IF2B_HUMAN           |
| P20042                                                                                     | 2             | 4.3076           | K.IFDIDEAEEGVK.D         | 2            | IF2B_HUMAN           |
| <b><i>Eukaryotic translation initiation factor 2A - Homo sapiens (Human)</i></b>           |               |                  |                          |              |                      |
| Q9BY44                                                                                     | 2             | 4.8835           | R.NTVSQSISGDPEIDKK.I     | 3            | EIF2A_HUMAN          |
| Q9BY44                                                                                     | 2             | 2.8113           | R.NVNNEVHFFENNNFNTIANK.L | 1            | EIF2A_HUMAN          |
| Q9BY44                                                                                     | 2             | 3.599            | K.SPDLAPTAPQSTPR.N       | 1            | EIF2A_HUMAN          |
| Q9BY44                                                                                     | 2             | 4.4368           | K.LKAIEQLKEQAATGK.Q      | 1            | EIF2A_HUMAN          |
| Q9BY44                                                                                     | 2             | 4.2852           | K.AIEQLKEQAATGK.Q        | 4            | EIF2A_HUMAN          |
| Q9BY44                                                                                     | 2             | 4.7659           | R.SDKSPDLAPTAPQSTPR.N    | 2            | EIF2A_HUMAN          |
| <b><i>Eukaryotic translation initiation factor 3 subunit 1 - Homo sapiens (Human)</i></b>  |               |                  |                          |              |                      |
| O75822                                                                                     | 2             | 2.9901           | K.KGVVPGGGLK.A           | 1            | IF31_HUMAN           |
| <b><i>Eukaryotic translation initiation factor 3 subunit 10 - Homo sapiens (Human)</i></b> |               |                  |                          |              |                      |
| Q14152                                                                                     | 2             | 3.3197           | K.AREESWGPPR.E           | 2            | IF3A_HUMAN           |
| Q14152                                                                                     | 2             | 3.6077           | R.RGPAEESSWR.D           | 4            | IF3A_HUMAN           |
| Q14152                                                                                     | 2             | 2.8902           | R.RVPPPALS.R             | 6            | IF3A_HUMAN           |
| Q14152                                                                                     | 2             | 3.3002           | R.SEREEVSSWR.R           | 2            | IF3A_HUMAN           |
| <b><i>Eukaryotic translation initiation factor 3 subunit 4 - Homo sapiens (Human)</i></b>  |               |                  |                          |              |                      |
| O75821                                                                                     | 2             | 3.1816           | R.RADDNATIR.V            | 1            | IF34_HUMAN           |
| O75821                                                                                     | 2             | 2.992            | R.RGESMQPNR.R            | 2            | IF34_HUMAN           |
| O75821                                                                                     | 2             | 4.2398           | K.TVTEYKIDEDGKK.F        | 2            | IF34_HUMAN           |

| <i>Accession No*</i>                                                                               | <i>Charge</i> | <i>XC(Max)**</i> | <i>Peptide*</i>                    | <i>TC***</i> | <i>Reference No*</i> |
|----------------------------------------------------------------------------------------------------|---------------|------------------|------------------------------------|--------------|----------------------|
| <b><i>Eukaryotic translation initiation factor 3 subunit 7 - Homo sapiens (Human)</i></b>          |               |                  |                                    |              |                      |
| O15371                                                                                             | 1             | 2.2734           | R.DSSVEVR.S                        | 1            | IF37_HUMAN           |
| O15371                                                                                             | 2             | 3.3117           | K.VADWTGATYQDK.R                   | 2            | IF37_HUMAN           |
| <b><i>Eukaryotic translation initiation factor 3 subunit 9 - Homo sapiens (Human)</i></b>          |               |                  |                                    |              |                      |
| P55884                                                                                             | 2             | 4.7845           | R.AQAVSEDAGGNEGR.A                 | 2            | IF39_HUMAN           |
| <b><i>Eukaryotic translation initiation factor 4 gamma 1 - Homo sapiens (Human)</i></b>            |               |                  |                                    |              |                      |
| Q04637                                                                                             | 2             | 2.7627           | R.GPQAGLGPR.R                      | 1            | IF4G1_HUMAN          |
| <b><i>Eukaryotic translation initiation factor 4 gamma 2 - Homo sapiens (Human)</i></b>            |               |                  |                                    |              |                      |
| P78344                                                                                             | 3             | 5.1464           | K.KGQLNADEISLRPAQSFLMNK.N          | 2            | IF4G2_HUMAN          |
| P78344                                                                                             | 3             | 4.0694           | K.SQGLSQLYHNQSQGLLSQLQGQSK.D       | 1            | IF4G2_HUMAN          |
| <b><i>Eukaryotic translation initiation factor 4B - Homo sapiens (Human)</i></b>                   |               |                  |                                    |              |                      |
| Q4G0E3                                                                                             | 2             | 3.7874           | R.STPKEDDSSASTSQSTR.A              | 7            | Q4G0E3_HUMA          |
| Q4G0E3                                                                                             | 2             | 3.8334           | K.EDDSSASTSQSTR.A                  | 3            | Q4G0E3_HUMA          |
| <b><i>Eukaryotic translation initiation factor 4E-binding protein 1 - Homo sapiens (Human)</i></b> |               |                  |                                    |              |                      |
| Q13541                                                                                             | 3             | 5.7719           | R.RVVLGDGVQLPPGDYSTTPGGTLFSTTPGGT  | 1            | 4EBP1_HUMAN          |
| Q13541                                                                                             | 3             | 6.9691           | K.TPPRDLPTIPGVTSPSSDEPPMEASQSHLR.N | 2            | 4EBP1_HUMAN          |
| Q13541                                                                                             | 2             | 3.5891           | K.RAGGEESQFEM#DI.-                 | 2            | 4EBP1_HUMAN          |
| Q13541                                                                                             | 2             | 3.2121           | K.RAGGEESQFEMDI.-                  | 1            | 4EBP1_HUMAN          |
| <b><i>Eukaryotic translation initiation factor 4E-binding protein 2 - Homo sapiens (Human)</i></b> |               |                  |                                    |              |                      |
| Q13542                                                                                             | 2             | 2.8527           | K.HAVGDDAQFEMDI.-                  | 1            | 4EBP2_HUMAN          |
| Q13542                                                                                             | 2             | 3.2079           | R.KHAVGDDAQFEMDI.-                 | 1            | 4EBP2_HUMAN          |
| <b><i>Eukaryotic translation initiation factor 4H - Homo sapiens (Human)</i></b>                   |               |                  |                                    |              |                      |
| Q15056                                                                                             | 2             | 3.84             | R.PREEVVQKEQE.-                    | 6            | IF4H_HUMAN           |
| Q15056                                                                                             | 1             | 2.182            | R.AYSSFGGGR.G                      | 1            | IF4H_HUMAN           |
| Q15056                                                                                             | 2             | 3.2475           | R.EEVVQKEQE.-                      | 3            | IF4H_HUMAN           |
| Q15056                                                                                             | 2             | 3.2417           | R.GSNMDFREPTTEER.A                 | 3            | IF4H_HUMAN           |
| <b><i>Eukaryotic translation initiation factor 5A-1 - Homo sapiens (Human)</i></b>                 |               |                  |                                    |              |                      |
| P63241                                                                                             | 2             | 4.5806           | R.NDFQLIGIQDGYLSLLQDSGEVR.E        | 2            | IF5A1_HUMAN          |
| P63241                                                                                             | 3             | 5.5021           | K.RNDFQLIGIQDGYLSLLQDSGEVR.E       | 1            | IF5A1_HUMAN          |
| <b><i>Eukaryotic translation initiation factor 5B - Homo sapiens (Human)</i></b>                   |               |                  |                                    |              |                      |
| O60841                                                                                             | 3             | 5.0405           | K.KQDFDEDDILKELEELSLEAQGIK.A       | 1            | IF2P_HUMAN           |
| O60841                                                                                             | 2             | 4.2553           | K.LLQAQGVVPSKDSLPK.K               | 3            | IF2P_HUMAN           |
| O60841                                                                                             | 2             | 3.8603           | K.WDGSEEDDNSK.K                    | 2            | IF2P_HUMAN           |
| O60841                                                                                             | 2             | 3.1741           | R.ETVAVKPTENNEEEFTSK.D             | 2            | IF2P_HUMAN           |
| O60841                                                                                             | 2             | 2.8871           | R.KFEEETVK.S                       | 4            | IF2P_HUMAN           |

| <i>Accession No*</i>                                                                      | <i>Charge</i> | <i>XC(Max)**</i> | <i>Peptide*</i>                   | <i>TC***</i> | <i>Reference No*</i> |
|-------------------------------------------------------------------------------------------|---------------|------------------|-----------------------------------|--------------|----------------------|
| <b><i>EVH1 domain binding protein - Homo sapiens (Human)</i></b>                          |               |                  |                                   |              |                      |
| Q9NZI9                                                                                    | 2             | 2.8185           | K.SNTWSWGILK.M                    | 1            | Q9NZI9_HUMAN         |
| Q9NZI9                                                                                    | 2             | 3.7929           | K.VSDSDNNEGSSFPAPPK.Q             | 4            | Q9NZI9_HUMAN         |
| <b><i>Extracellular superoxide dismutase [Cu-Zn] precursor - Homo sapiens (Human)</i></b> |               |                  |                                   |              |                      |
| P08294                                                                                    | 2             | 3.9631           | R.GGNQASVENGNAGR.R                | 2            | SODE_HUMAN           |
| <b><i>Ezrin-radixin-moesin-binding phosphoprotein 50 - Homo sapiens (Human)</i></b>       |               |                  |                                   |              |                      |
| O14745                                                                                    | 2             | 3.3518           | R.IVEVNGVCM#EGK.Q                 | 2            | NHERF_HUMAN          |
| O14745                                                                                    | 2             | 4.2621           | R.IVEVNGVCMEGK.Q                  | 7            | NHERF_HUMAN          |
| O14745                                                                                    | 3             | 4.0588           | R.LCCLEKGPNGYGFHLHGEK.G           | 1            | NHERF_HUMAN          |
| O14745                                                                                    | 2             | 3.7728           | R.LLVVDPETDEQLQK.L                | 8            | NHERF_HUMAN          |
| O14745                                                                                    | 1             | 2.7944           | R.LVEPGSPA EK.A                   | 2            | NHERF_HUMAN          |
| O14745                                                                                    | 2             | 2.8051           | R.LVEVNGENVEK.E                   | 2            | NHERF_HUMAN          |
| O14745                                                                                    | 3             | 5.3847           | R.EELLRAQEAPGQAEPAAAAEVQGAGNENEP  | 2            | NHERF_HUMAN          |
| O14745                                                                                    | 2             | 4.8236           | R.SASSDTSEELNSQDSPPK.Q            | 3            | NHERF_HUMAN          |
| O14745                                                                                    | 2             | 3.9834           | K.LLVVDRETDEFFK.K                 | 5            | NHERF_HUMAN          |
| O14745                                                                                    | 2             | 4.0251           | R.SVDPDSPA EASGLR.A               | 4            | NHERF_HUMAN          |
| O14745                                                                                    | 2             | 5.1244           | R.LVEVNGENVEKETHQQVVS.R.I         | 1            | NHERF_HUMAN          |
| O14745                                                                                    | 3             | 5.5623           | K.AGLLAGDRLVEVNGENVEK.E           | 5            | NHERF_HUMAN          |
| O14745                                                                                    | 3             | 6.4321           | R.AQEAPGQAEPAAAAEVQGAGNENEPR.E    | 3            | NHERF_HUMAN          |
| O14745                                                                                    | 2             | 3.2102           | K.AGLLAGDR.L                      | 2            | NHERF_HUMAN          |
| O14745                                                                                    | 2             | 3.4051           | R.EALAEAALESPPALVR.S              | 5            | NHERF_HUMAN          |
| O14745                                                                                    | 3             | 8.3202           | K.AGLLAGDRLVEVNGENVEKETHQQVVS.R.I | 10           | NHERF_HUMAN          |
| O14745                                                                                    | 2             | 4.2386           | K.GPSGYGFNLHSDK.S                 | 2            | NHERF_HUMAN          |
| O14745                                                                                    | 2             | 5.3923           | K.KGPSGYGFNLHSDK.S                | 13           | NHERF_HUMAN          |
| O14745                                                                                    | 2             | 2.7358           | K.LGVQVREELLR.A                   | 2            | NHERF_HUMAN          |
| O14745                                                                                    | 2             | 3.0941           | K.LLVVDRETDEFFK.K                 | 2            | NHERF_HUMAN          |
| O14745                                                                                    | 2             | 2.8123           | R.APQMDWSK.K                      | 2            | NHERF_HUMAN          |
| <b><i>FABP1 protein - Homo sapiens (Human)</i></b>                                        |               |                  |                                   |              |                      |
| Q05CP7                                                                                    | 2             | 2.9352           | K.YQLQSQENFEAFM#K.A               | 1            | Q05CP7_HUMA          |
| Q05CP7                                                                                    | 2             | 3.0729           | K.YQLQSQENFEAFMK.A                | 2            | Q05CP7_HUMA          |
| <b><i>FACT complex subunit SSRP1 - Homo sapiens (Human)</i></b>                           |               |                  |                                   |              |                      |
| Q08945                                                                                    | 3             | 3.93             | K.IKSDHPGISITDLSK.K               | 1            | SSRP1_HUMAN          |
| Q08945                                                                                    | 2             | 2.7515           | K.NM#SGSLYEM#VSRVMK.A             | 1            | SSRP1_HUMAN          |
| Q08945                                                                                    | 2             | 2.8886           | K.SDHPGISITDLSK.K                 | 1            | SSRP1_HUMAN          |
| Q08945                                                                                    | 1             | 2.2619           | R.QLSESFK.S                       | 1            | SSRP1_HUMAN          |

| <i>Accession No*</i>                                                              | <i>Charge</i> | <i>XC(Max)**</i> | <i>Peptide*</i>            | <i>TC***</i> | <i>Reference No*</i> |
|-----------------------------------------------------------------------------------|---------------|------------------|----------------------------|--------------|----------------------|
| <b><i>F-actin-capping protein subunit alpha-1 - Homo sapiens (Human)</i></b>      |               |                  |                            |              |                      |
| P52907                                                                            | 3             | 5.5663           | K.FITHAPPGEFNEVFNDVR.L     | 4            | CAZA1_HUMAN          |
| P52907                                                                            | 2             | 3.8265           | K.EASDPQPEEADGGLK.S        | 4            | CAZA1_HUMAN          |
| <b><i>F-actin-capping protein subunit alpha-2 - Homo sapiens (Human)</i></b>      |               |                  |                            |              |                      |
| P47755                                                                            | 3             | 4.6056           | K.FIIHAPPGEFNEVFNDVR.L     | 1            | CAZA2_HUMAN          |
| <b><i>FAM39B protein - Homo sapiens (Human)</i></b>                               |               |                  |                            |              |                      |
| Q2TAC3                                                                            | 2             | 4.7906           | R.QDDGSSSASPSVQGAPR.E      | 3            | Q2TAC3_HUMA          |
| <b><i>FAM44A protein - Homo sapiens (Human)</i></b>                               |               |                  |                            |              |                      |
| Q96AL1                                                                            | 2             | 4.2121           | K.VMQTDESNETANLQER.S       | 1            | Q96AL1_HUMAN         |
| Q96AL1                                                                            | 2             | 2.7061           | R.SISNDDGEEK.I             | 1            | Q96AL1_HUMAN         |
| Q96AL1                                                                            | 2             | 3.6855           | R.SLTVSDDAESSEPER.K        | 2            | Q96AL1_HUMAN         |
| <b><i>Family with sequence similarity 39, member B - Homo sapiens (Human)</i></b> |               |                  |                            |              |                      |
| Q86TK9                                                                            | 2             | 3.3701           | R.ATSQGGDLM#SDLFNK.L       | 1            | Q86TK9_HUMAN         |
| <b><i>Far upstream element-binding protein 1 - Homo sapiens (Human)</i></b>       |               |                  |                            |              |                      |
| Q96AE4                                                                            | 3             | 3.995            | K.RPLEDGDQPDAAK.V          | 1            | FUBP1_HUMAN          |
| Q96AE4                                                                            | 3             | 4.5761           | R.SVMTEEYKVPDGM#VGFIIGR.G  | 2            | FUBP1_HUMAN          |
| Q96AE4                                                                            | 3             | 4.3803           | R.SVM#TEEYKVPDGM#VGFIIGR.G | 1            | FUBP1_HUMAN          |
| Q96AE4                                                                            | 2             | 3.8397           | K.RPLEDGDQPDAAK.K          | 3            | FUBP1_HUMAN          |
| Q96AE4                                                                            | 2             | 2.7016           | K.RLLDQIVEK.G              | 1            | FUBP1_HUMAN          |
| Q96AE4                                                                            | 2             | 4.3606           | K.IQIAPDSGGLPER.S          | 4            | FUBP1_HUMAN          |
| Q96AE4                                                                            | 2             | 4.0232           | K.IGGDAGTSLNSNDYGYGGQK.R   | 4            | FUBP1_HUMAN          |
| Q96AE4                                                                            | 3             | 4.7837           | R.SVM#TEEYKVPDGMVGFIIGR.G  | 1            | FUBP1_HUMAN          |
| <b><i>Far upstream element-binding protein 2 - Homo sapiens (Human)</i></b>       |               |                  |                            |              |                      |
| Q92945                                                                            | 2             | 3.0155           | K.DAFADAVQR.A              | 3            | FUBP2_HUMAN          |
| Q92945                                                                            | 3             | 3.7861           | R.IIGDPYKQQACEMVM#DILR.E   | 1            | FUBP2_HUMAN          |
| Q92945                                                                            | 3             | 5.7806           | R.TSMTEEYRVPDGMVGLIIGR.G   | 3            | FUBP2_HUMAN          |
| Q92945                                                                            | 3             | 4.9774           | R.TSMTEEYRVPDGM#VGLIIGR.G  | 3            | FUBP2_HUMAN          |
| Q92945                                                                            | 3             | 5.6904           | R.TSM#TEEYRVPDGMVGLIIGR.G  | 3            | FUBP2_HUMAN          |
| Q92945                                                                            | 3             | 3.9962           | R.TSM#TEEYRVPDGM#VGLIIGR.G | 1            | FUBP2_HUMAN          |
| Q92945                                                                            | 2             | 4.0859           | R.SVSLTGAPESVQK.A          | 5            | FUBP2_HUMAN          |
| Q92945                                                                            | 2             | 3.0047           | R.QLEDGDQPESK.K            | 4            | FUBP2_HUMAN          |
| Q92945                                                                            | 2             | 3.9224           | R.KDAFADAVQR.A             | 2            | FUBP2_HUMAN          |
| Q92945                                                                            | 2             | 4.3127           | R.IQFKQDDGTGPEK.I          | 1            | FUBP2_HUMAN          |
| Q92945                                                                            | 3             | 3.9642           | R.IIGDPYKQQACEM#VMDILR.E   | 1            | FUBP2_HUMAN          |
| Q92945                                                                            | 2             | 4.2446           | R.IGGGIDVPVPR.H            | 6            | FUBP2_HUMAN          |

| <i>Accession No*</i>                                                                         | <i>Charge</i> | <i>XC(Max)**</i> | <i>Peptide*</i>              | <i>TC***</i> | <i>Reference No*</i> |
|----------------------------------------------------------------------------------------------|---------------|------------------|------------------------------|--------------|----------------------|
| Q92945                                                                                       | 2             | 4.0486           | K.VQISPDSGGLPER.S            | 2            | FUBP2_HUMAN          |
| Q92945                                                                                       | 2             | 3.5588           | K.MMLDDIVSR.G                | 3            | FUBP2_HUMAN          |
| Q92945                                                                                       | 2             | 4.3587           | K.MILIQDGSQNTNVDKPLR.I       | 2            | FUBP2_HUMAN          |
| Q92945                                                                                       | 2             | 3.8647           | K.LASQGDSISSQLGPIHPPPR.T     | 2            | FUBP2_HUMAN          |
| Q92945                                                                                       | 3             | 4.6158           | K.IGGDAATTVNNSTPDFGFGGQKR.Q  | 4            | FUBP2_HUMAN          |
| Q92945                                                                                       | 2             | 4.054            | K.AINQQTGAFVEISR.Q           | 2            | FUBP2_HUMAN          |
| Q92945                                                                                       | 3             | 5.1517           | K.KLASQGDSISSQLGPIHPPPR.T    | 5            | FUBP2_HUMAN          |
| <b><i>Fatty acid-binding protein, epidermal - Homo sapiens (Human)</i></b>                   |               |                  |                              |              |                      |
| Q01469                                                                                       | 1             | 2.1573           | K.GFDEYMK.E                  | 1            | FABPE_HUMAN          |
| Q01469                                                                                       | 3             | 4.5367           | R.LVDSKGFDEYMKELGVGIALR.K    | 2            | FABPE_HUMAN          |
| Q01469                                                                                       | 2             | 2.7627           | K.FEETTADGRK.T               | 1            | FABPE_HUMAN          |
| Q01469                                                                                       | 3             | 3.9703           | K.GFDEYMKELGVGIALRK.M        | 1            | FABPE_HUMAN          |
| Q01469                                                                                       | 2             | 4.6262           | K.GFDEYMKELGVGIALR.K         | 4            | FABPE_HUMAN          |
| <b><i>Fatty acid-binding protein, heart - Homo sapiens (Human)</i></b>                       |               |                  |                              |              |                      |
| P05413                                                                                       | 2             | 2.8983           | K.WDQGETTLVR.E               | 1            | FABPH_HUMAN          |
| P05413                                                                                       | 2             | 3.1167           | R.QVASMTKPTTIEK.N            | 1            | FABPH_HUMAN          |
| <b><i>FERM, RhoGEF and pleckstrin domain-containing protein 1 - Homo sapiens (Human)</i></b> |               |                  |                              |              |                      |
| Q9Y4F1                                                                                       | 3             | 3.8658           | K.QADGAASAPTEEEEEVVKDR.T     | 1            | FARP1_HUMAN          |
| Q9Y4F1                                                                                       | 2             | 3.3765           | K.VSAGEPGSHSPAPR.R           | 1            | FARP1_HUMAN          |
| <b><i>FERM, RhoGEF and pleckstrin domain-containing protein 2 - Homo sapiens (Human)</i></b> |               |                  |                              |              |                      |
| O94887                                                                                       | 2             | 3.7626           | K.DSSSSLTDPQVSYVK.S          | 2            | FARP2_HUMAN          |
| <b><i>Ferritin heavy chain - Homo sapiens (Human)</i></b>                                    |               |                  |                              |              |                      |
| P02794                                                                                       | 3             | 4.1383           | K.AIKELGDHVTNLR.K            | 3            | FRIH_HUMAN           |
| P02794                                                                                       | 2             | 4.2803           | K.NVNQSLLELHK.L              | 4            | FRIH_HUMAN           |
| P02794                                                                                       | 3             | 4.0269           | K.MGAPESGLAEYLFDKHTLGSDNES.- | 1            | FRIH_HUMAN           |
| P02794                                                                                       | 2             | 4.6006           | K.AIKELGDHVTNLRK.M           | 4            | FRIH_HUMAN           |
| P02794                                                                                       | 2             | 4.2668           | K.M#GAPESGLAEYLFDK.H         | 3            | FRIH_HUMAN           |
| <b><i>Ferritin light chain - Homo sapiens (Human)</i></b>                                    |               |                  |                              |              |                      |
| P02792                                                                                       | 2             | 4.8461           | R.LGGPEAGLGEYLFER.L          | 11           | FRIL_HUMAN           |
| <b><i>FGFR1 oncogene partner - Homo sapiens (Human)</i></b>                                  |               |                  |                              |              |                      |
| O95684                                                                                       | 3             | 5.0422           | K.IGSLGLGTGEDDDYVDDFNSTSHR.S | 6            | FR1OP_HUMAN          |
| <b><i>FGFR1 oncogene partner 2 - Homo sapiens (Human)</i></b>                                |               |                  |                              |              |                      |
| Q9NVK5                                                                                       | 2             | 3.1657           | R.TSLEEHQSALELIMSK.Y         | 2            | FGOP2_HUMAN          |
| Q9NVK5                                                                                       | 2             | 3.4462           | K.QYQEEIQELNEVAR.H           | 1            | FGOP2_HUMAN          |
| Q9NVK5                                                                                       | 2             | 3.1196           | R.STLVMGIQQENR.Q             | 1            | FGOP2_HUMAN          |

| <i>Accession No*</i>                                                                               | <i>Charge</i> | <i>XC(Max)**</i> | <i>Peptide*</i>                   | <i>TC***</i> | <i>Reference No*</i> |
|----------------------------------------------------------------------------------------------------|---------------|------------------|-----------------------------------|--------------|----------------------|
| <b><i>FH1/FH2 domain-containing protein 1 - Homo sapiens (Human)</i></b>                           |               |                  |                                   |              |                      |
| Q9Y613                                                                                             | 2             | 5.1642           | K.SGLGDDLVLQALGLSK.G              | 1            | FHOD1_HUMAN          |
| Q9Y613                                                                                             | 2             | 3.7661           | K.SGLGDDLVLQALGLSKGPGLEV.-        | 2            | FHOD1_HUMAN          |
| <b><i>Fibrillin-1 precursor - Homo sapiens (Human)</i></b>                                         |               |                  |                                   |              |                      |
| P35555                                                                                             | 2             | 4.0502           | R.YEDEECTLPIAGR.H                 | 3            | FBN1_HUMAN           |
| P35555                                                                                             | 1             | 3.5431           | K.GYLQEDGR.S                      | 6            | FBN1_HUMAN           |
| P35555                                                                                             | 1             | 3.3943           | R.AGYQSTLTR.T                     | 3            | FBN1_HUMAN           |
| P35555                                                                                             | 3             | 4.232            | R.IGQGHCVSGM#GM#GR.G              | 3            | FBN1_HUMAN           |
| P35555                                                                                             | 3             | 4.0238           | R.IGQGHCVSGM#GMGR.G               | 1            | FBN1_HUMAN           |
| P35555                                                                                             | 3             | 4.0593           | R.IGQGHCVSGMGM#GR.G               | 1            | FBN1_HUMAN           |
| P35555                                                                                             | 2             | 2.8336           | R.NTPEYEELCPR.G                   | 1            | FBN1_HUMAN           |
| <b><i>Fibrinogen alpha chain precursor [Contains: Fibrinopeptide A] - Homo sapiens (Human)</i></b> |               |                  |                                   |              |                      |
| P02671                                                                                             | 2             | 2.7296           | K.VTSGSTTTTR.R                    | 1            | FIBA_HUMAN           |
| P02671                                                                                             | 2             | 2.9056           | R.GDSTFESK.S                      | 1            | FIBA_HUMAN           |
| P02671                                                                                             | 2             | 3.5577           | R.GGSTSYGTGSETESPR.N              | 4            | FIBA_HUMAN           |
| P02671                                                                                             | 2             | 2.9722           | R.GSESGIFTNTK.E                   | 3            | FIBA_HUMAN           |
| P02671                                                                                             | 3             | 5.3934           | R.HRHPDEAAFFDTASTGK.T             | 6            | FIBA_HUMAN           |
| P02671                                                                                             | 2             | 3.2286           | R.MELERPGGNEITR.G                 | 2            | FIBA_HUMAN           |
| P02671                                                                                             | 2             | 5.6046           | R.NPSSAGSWNSGSSGPGSTGNR.N         | 6            | FIBA_HUMAN           |
| P02671                                                                                             | 3             | 7.1025           | R.GGSTSYGTGSETESPRNPSSAGSWNSGSS   | 4            | FIBA_HUMAN           |
| P02671                                                                                             | 2             | 3.9943           | K.TVIGPDGHKEVTK.E                 | 5            | FIBA_HUMAN           |
| P02671                                                                                             | 2             | 4.7947           | R.PGSTGTWNPSSER.G                 | 4            | FIBA_HUMAN           |
| P02671                                                                                             | 3             | 4.8114           | K.TFPGFFSPM#LGEFVSETESR.G         | 6            | FIBA_HUMAN           |
| P02671                                                                                             | 2             | 4.7247           | K.MADEAGSEADHEGTHSTKR.G           | 4            | FIBA_HUMAN           |
| P02671                                                                                             | 2             | 4.1411           | K.MADEAGSEADHEGTHSTK.R            | 5            | FIBA_HUMAN           |
| P02671                                                                                             | 2             | 3.8702           | K.M#ADEAGSEADHEGTHSTKR.G          | 3            | FIBA_HUMAN           |
| P02671                                                                                             | 2             | 2.7717           | K.ALTDMPQMR.M                     | 2            | FIBA_HUMAN           |
| P02671                                                                                             | 2             | 3.574            | K.LVTSKGDKELR.T                   | 4            | FIBA_HUMAN           |
| P02671                                                                                             | 2             | 4.5934           | R.HPDEAAFFDTASTGK.T               | 5            | FIBA_HUMAN           |
| P02671                                                                                             | 3             | 4.4398           | K.EVTKEVVTSEDGSDCPEAMDGLTSLGIGTLD | 1            | FIBA_HUMAN           |
| P02671                                                                                             | 3             | 4.1314           | K.ESSSHHPGIAEFPSR.G               | 10           | FIBA_HUMAN           |
| P02671                                                                                             | 2             | 3.404            | K.EKVTSGSTTTTR.R                  | 3            | FIBA_HUMAN           |
| P02671                                                                                             | 1             | 2.2535           | K.ALTDMPQMR.M                     | 2            | FIBA_HUMAN           |
| P02671                                                                                             | 3             | 4.7208           | K.TFPGFFSPMLGEFVSETESR.G          | 17           | FIBA_HUMAN           |
| <b><i>Fibrinogen beta chain precursor [Contains: Fibrinopeptide B] - Homo sapiens (Human)</i></b>  |               |                  |                                   |              |                      |



| <i>Accession No*</i>                                                                   | <i>Charge</i> | <i>XC(Max)**</i> | <i>Peptide*</i>                    | <i>TC***</i> | <i>Reference No*</i> |
|----------------------------------------------------------------------------------------|---------------|------------------|------------------------------------|--------------|----------------------|
| P02675                                                                                 | 3             | 4.2279           | K.GGETSEMYLIQPDSSVKPYR.V           | 1            | FIBB_HUMAN           |
| P02675                                                                                 | 3             | 6.864            | R.KGGETSEMYLIQPDSSVKPYR.V          | 3            | FIBB_HUMAN           |
| <b><i>Fibrinogen gamma chain precursor - Homo sapiens (Human)</i></b>                  |               |                  |                                    |              |                      |
| P02679                                                                                 | 2             | 4.6127           | K.AIQLTYNPDESSKPNMIDAATLK.S        | 1            | FIBG_HUMAN           |
| P02679                                                                                 | 2             | 3.446            | R.FGSYCPTTCGIADFLSTYQTK.V          | 1            | FIBG_HUMAN           |
| P02679                                                                                 | 3             | 3.7637           | K.AIQLTYNPDESSKPNM#IDAATLK.S       | 1            | FIBG_HUMAN           |
| <b><i>Fibroleukin precursor - Homo sapiens (Human)</i></b>                             |               |                  |                                    |              |                      |
| Q14314                                                                                 | 2             | 3.1049           | K.LQADDNGDPGR.N                    | 2            | FGL2_HUMAN           |
| <b><i>Fibronectin precursor - Homo sapiens (Human)</i></b>                             |               |                  |                                    |              |                      |
| P02751                                                                                 | 2             | 4.1452           | K.GLAFTDVIDVDSIK.I                 | 2            | FINC_HUMAN           |
| P02751                                                                                 | 2             | 3.2775           | K.IAWESPQGQVSR.Y                   | 2            | FINC_HUMAN           |
| P02751                                                                                 | 2             | 6.4671           | R.RPGGEPSPGTTGQSYNQYSQR.Y          | 4            | FINC_HUMAN           |
| <b><i>Fibronectin type III and SPRY domain containing 2 - Homo sapiens (Human)</i></b> |               |                  |                                    |              |                      |
| A1L4K1                                                                                 | 1             | 2.2344           | R.AGPSPSSER.A                      | 1            | A1L4K1_HUMAN         |
| <b><i>Fibulin-1 precursor - Homo sapiens (Human)</i></b>                               |               |                  |                                    |              |                      |
| P23142                                                                                 | 2             | 3.8623           | K.TGYFDGISR.M                      | 5            | FBLN1_HUMAN          |
| P23142                                                                                 | 2             | 3.4066           | K.DCSLPYATESK.E                    | 3            | FBLN1_HUMAN          |
| P23142                                                                                 | 2             | 2.7967           | R.SAATLQQEK.T                      | 1            | FBLN1_HUMAN          |
| P23142                                                                                 | 2             | 2.9754           | R.GYHLNEEGTR.C                     | 1            | FBLN1_HUMAN          |
| P23142                                                                                 | 2             | 3.8657           | K.SQETGDLDVGGLQETDK.I              | 1            | FBLN1_HUMAN          |
| P23142                                                                                 | 2             | 3.5463           | K.IIEVEEQEDPYLNDR.C                | 2            | FBLN1_HUMAN          |
| P23142                                                                                 | 3             | 6.1287           | K.SQETGDLDVGGLQETDKIIEVEEQEDPYLND  | 3            | FBLN1_HUMAN          |
| <b><i>Filamin-C - Homo sapiens (Human)</i></b>                                         |               |                  |                                    |              |                      |
| Q14315                                                                                 | 2             | 3.025            | R.AWGPGLETGQVGK.S                  | 2            | FLNC_HUMAN           |
| <b><i>FK506-binding protein 10 precursor - Homo sapiens (Human)</i></b>                |               |                  |                                    |              |                      |
| Q96AY3                                                                                 | 2             | 3.5568           | K.GGTYDTYVGSGLIK.G                 | 1            | FKB10_HUMAN          |
| <b><i>FK506-binding protein 15 - Homo sapiens (Human)</i></b>                          |               |                  |                                    |              |                      |
| Q5T1M5                                                                                 | 3             | 3.7687           | K.KDDVTSSTGPHK.E                   | 2            | Q5T1M5_HUMA          |
| Q5T1M5                                                                                 | 2             | 2.7119           | R.EVAPDGPLQESSTR.L                 | 1            | Q5T1M5_HUMA          |
| Q5T1M5                                                                                 | 3             | 3.8852           | R.LSLTSDPEEGDPLALGPESPGEPQPPQLKK.D | 1            | Q5T1M5_HUMA          |
| <b><i>FK506-binding protein 2 precursor - Homo sapiens (Human)</i></b>                 |               |                  |                                    |              |                      |
| P26885                                                                                 | 2             | 2.819            | K.LVIPSELGYGER.G                   | 2            | FKBP2_HUMAN          |
| P26885                                                                                 | 2             | 3.1328           | R.KLVIPSELGYGER.G                  | 1            | FKBP2_HUMAN          |
| P26885                                                                                 | 2             | 3.1388           | K.GWDQGLLGMCEGEK.R                 | 1            | FKBP2_HUMAN          |
| <b><i>FK506-binding protein 3 - Homo sapiens (Human)</i></b>                           |               |                  |                                    |              |                      |

| <i>Accession No*</i>                                                   | <i>Charge</i> | <i>XC(Max)**</i> | <i>Peptide*</i>          | <i>TC***</i> | <i>Reference No*</i> |
|------------------------------------------------------------------------|---------------|------------------|--------------------------|--------------|----------------------|
| Q00688                                                                 | 2             | 4.6433           | K.SEETLDEGPPKYTK.S       | 3            | FKBP3_HUMAN          |
| Q00688                                                                 | 2             | 4.5247           | R.GWDEALLTMSK.G          | 9            | FKBP3_HUMAN          |
| Q00688                                                                 | 2             | 3.6294           | R.GWDEALLTM#SK.G         | 2            | FKBP3_HUMAN          |
| Q00688                                                                 | 2             | 4.6113           | R.AWTVEQLRSEQLPK.K       | 5            | FKBP3_HUMAN          |
| Q00688                                                                 | 2             | 3.54             | K.ETKSEETLDEGPPK.Y       | 3            | FKBP3_HUMAN          |
| Q00688                                                                 | 1             | 2.282            | R.AWTVEQLR.S             | 1            | FKBP3_HUMAN          |
| Q00688                                                                 | 3             | 5.2783           | K.TANKDHLVTAYNHLFETKR.F  | 4            | FKBP3_HUMAN          |
| Q00688                                                                 | 3             | 4.8959           | K.TANKDHLVTAYNHLFETK.R   | 2            | FKBP3_HUMAN          |
| Q00688                                                                 | 2             | 4.1292           | R.GWDEALLTMSKGEK.A       | 2            | FKBP3_HUMAN          |
| Q00688                                                                 | 3             | 4.2204           | K.ARLEIEPEWAYGK.K        | 5            | FKBP3_HUMAN          |
| Q00688                                                                 | 2             | 2.793            | K.LNEDKPKETK.S           | 2            | FKBP3_HUMAN          |
| Q00688                                                                 | 1             | 2.1575           | K.LLGNK.N                | 3            | FKBP3_HUMAN          |
| Q00688                                                                 | 2             | 3.2389           | K.KGDKTNFPK.K            | 1            | FKBP3_HUMAN          |
| Q00688                                                                 | 3             | 4.8264           | K.FLQEHGSDSFLAEHK.L      | 5            | FKBP3_HUMAN          |
| Q00688                                                                 | 3             | 5.4461           | K.FLQEHGSDSFLAEHKLLGNK.N | 2            | FKBP3_HUMAN          |
| Q00688                                                                 | 3             | 4.7818           | K.ARLEIEPEWAYGKK.G       | 6            | FKBP3_HUMAN          |
| Q00688                                                                 | 2             | 4.2726           | K.SEETLDEGPPK.Y          | 4            | FKBP3_HUMAN          |
| <b><i>FK506-binding protein 4 - Homo sapiens (Human)</i></b>           |               |                  |                          |              |                      |
| Q02790                                                                 | 2             | 3.6501           | K.AEASSGDHPTDTEMKEEQK.S  | 2            | FKBP4_HUMAN          |
| Q02790                                                                 | 2             | 3.3948           | R.LAEEENKAK.A            | 7            | FKBP4_HUMAN          |
| <b><i>FK506-binding protein 7 precursor - Homo sapiens (Human)</i></b> |               |                  |                          |              |                      |
| Q9Y680                                                                 | 3             | 4.1235           | K.KGDLNLAHYDGYLAK.D      | 2            | FKBP7_HUMAN          |
| Q9Y680                                                                 | 2             | 3.3165           | K.WFVLGVGQVIK.G          | 2            | FKBP7_HUMAN          |
| <b><i>FKSG42 - Homo sapiens (Human)</i></b>                            |               |                  |                          |              |                      |
| Q9BZ74                                                                 | 2             | 3.0248           | -.MDTTMLNMRNLFELVLR.G    | 1            | Q9BZ74_HUMAN         |
| <b><i>FLJ00412 protein - Homo sapiens (Human)</i></b>                  |               |                  |                          |              |                      |
| Q86YV0                                                                 | 2             | 5.1139           | R.TSQTQPTATSPLTSYR.W     | 5            | Q86YV0_HUMA          |
| <b><i>FLJ10357 protein - Homo sapiens (Human)</i></b>                  |               |                  |                          |              |                      |
| A5PL07                                                                 | 2             | 3.4177           | K.QISLAPETLDSSGDVSPGPR.N | 2            | A5PL07_HUMAN         |
| <b><i>FLJ43692 protein - Homo sapiens (Human)</i></b>                  |               |                  |                          |              |                      |
| A5YM69                                                                 | 2             | 3.1928           | K.QKQEQVQDVMLGR.Q        | 1            | A5YM69_HUMA          |
| A5YM69                                                                 | 2             | 3.8129           | K.SEEVTGKQEDHGIKEK.G     | 2            | A5YM69_HUMA          |
| A5YM69                                                                 | 3             | 4.6528           | R.KAQQGGGPEQGEER.K       | 7            | A5YM69_HUMA          |
| A5YM69                                                                 | 2             | 5.2169           | K.GVPVSGQEAKEPESWDGGR.L  | 3            | A5YM69_HUMA          |
| <b><i>Flotillin-2 - Homo sapiens (Human)</i></b>                       |               |                  |                          |              |                      |

| <i>Accession No*</i>                                                                         | <i>Charge</i> | <i>XC(Max)**</i> | <i>Peptide*</i>                 | <i>TC***</i> | <i>Reference No*</i> |
|----------------------------------------------------------------------------------------------|---------------|------------------|---------------------------------|--------------|----------------------|
| Q14254                                                                                       | 2             | 3.4736           | K.TAEAQLAYELQGAR.E              | 1            | FLOT2_HUMAN          |
| <b><i>Follistatin-related protein 1 precursor - Homo sapiens (Human)</i></b>                 |               |                  |                                 |              |                      |
| Q12841                                                                                       | 2             | 3.7402           | K.GAQTQTEEEM#TR.Y               | 3            | FSTL1_HUMAN          |
| Q12841                                                                                       | 2             | 3.2519           | K.GAQTQTEEEMTR.Y                | 1            | FSTL1_HUMAN          |
| Q12841                                                                                       | 2             | 3.0302           | K.LSFQEFLK.C                    | 2            | FSTL1_HUMAN          |
| Q12841                                                                                       | 1             | 2.3213           | R.DAACLTSK.I                    | 1            | FSTL1_HUMAN          |
| <b><i>Forkhead box protein K1 - Homo sapiens (Human)</i></b>                                 |               |                  |                                 |              |                      |
| P85037                                                                                       | 2             | 5.876            | R.SRVEEPSGAVTTPAGVIAAAGPQGPGE.- | 2            | FOXK1_HUMAN          |
| <b><i>Forkhead box protein N3 - Homo sapiens (Human)</i></b>                                 |               |                  |                                 |              |                      |
| O00409                                                                                       | 2             | 3.1988           | K.DSLGDSGYASQHK.K               | 1            | FOXN3_HUMAN          |
| <b><i>Forkhead box protein O1A - Homo sapiens (Human)</i></b>                                |               |                  |                                 |              |                      |
| Q12778                                                                                       | 3             | 4.522            | K.ELLTSDSPPHNDIMTPVDPGVAQPNSR.V | 2            | FOXO1_HUMAN          |
| <b><i>Forkhead box protein O3A - Homo sapiens (Human)</i></b>                                |               |                  |                                 |              |                      |
| O43524                                                                                       | 2             | 3.4103           | R.NAWGNLSYADLITR.A              | 2            | FOXO3_HUMAN          |
| <b><i>Formin-binding protein 1-like - Homo sapiens (Human)</i></b>                           |               |                  |                                 |              |                      |
| Q5T0N5                                                                                       | 3             | 3.917            | R.MEIHKNEAWLSEVEGK.T            | 1            | FBP1L_HUMAN          |
| <b><i>Formin-binding protein 4 - Homo sapiens (Human)</i></b>                                |               |                  |                                 |              |                      |
| Q8N3X1                                                                                       | 2             | 4.1142           | R.NANFEALPEDWR.A                | 3            | FNBP4_HUMAN          |
| <b><i>Forty-two-three domain-containing protein 1 - Homo sapiens (Human)</i></b>             |               |                  |                                 |              |                      |
| Q96QD9                                                                                       | 2             | 3.1182           | K.GVPLQFDINSVGK.Q               | 1            | FYTD1_HUMAN          |
| Q96QD9                                                                                       | 2             | 3.0444           | R.LVGATATSSPPPK.A               | 1            | FYTD1_HUMAN          |
| <b><i>Fos-related antigen 2 - Homo sapiens (Human)</i></b>                                   |               |                  |                                 |              |                      |
| P15408                                                                                       | 3             | 3.8763           | R.GSSGSPAHAESYSSGGGGQK.F        | 1            | FOSL2_HUMAN          |
| <b><i>Four and a half LIM domains protein 3 - Homo sapiens (Human)</i></b>                   |               |                  |                                 |              |                      |
| Q13643                                                                                       | 2             | 3.34             | K.RPIVGLGGGK.Y                  | 2            | FHL3_HUMAN           |
| <b><i>Fragile X mental retardation syndrome-related protein 1 - Homo sapiens (Human)</i></b> |               |                  |                                 |              |                      |
| P51114                                                                                       | 2             | 3.6509           | K.AINGPTSASGDDISK.L             | 4            | FXR1_HUMAN           |
| P51114                                                                                       | 2             | 3.2494           | K.DVIEEHGPSEK.A                 | 2            | FXR1_HUMAN           |
| <b><i>Fragile X mental retardation syndrome-related protein 2 - Homo sapiens (Human)</i></b> |               |                  |                                 |              |                      |
| P51116                                                                                       | 3             | 4.2527           | R.TDGSISGDRQPVTVADYISR.A        | 1            | FXR2_HUMAN           |
| <b><i>Frataxin, mitochondrial precursor - Homo sapiens (Human)</i></b>                       |               |                  |                                 |              |                      |
| Q16595                                                                                       | 2             | 4.1487           | K.LDLSSLAYSGKDA.-               | 1            | FRDA_HUMAN           |
| Q16595                                                                                       | 2             | 3.5674           | K.LGGDLGTYVINK.Q                | 2            | FRDA_HUMAN           |
| Q16595                                                                                       | 3             | 4.5593           | K.SGTLGHPGSLDETTYER.L           | 4            | FRDA_HUMAN           |
| Q16595                                                                                       | 2             | 5.0139           | K.TKLDLSSLAYSGKDA.-             | 2            | FRDA_HUMAN           |

| <i>Accession No*</i>                                                                  | <i>Charge</i> | <i>XC(Max)**</i> | <i>Peptide*</i>                | <i>TC***</i> | <i>Reference No*</i> |
|---------------------------------------------------------------------------------------|---------------|------------------|--------------------------------|--------------|----------------------|
| <b><i>Frizzled-6 precursor - Homo sapiens (Human)</i></b>                             |               |                  |                                |              |                      |
| O60353                                                                                | 2             | 2.7514           | K.GQAGSVSESAR.S                | 1            | FZD6_HUMAN           |
| O60353                                                                                | 3             | 4.4486           | R.LSGEQVDGKGQAGSVSESAR.S       | 2            | FZD6_HUMAN           |
| <b><i>Fructose-1,6-bisphosphatase 1 - Homo sapiens (Human)</i></b>                    |               |                  |                                |              |                      |
| P09467                                                                                | 2             | 3.8775           | K.EAVLDVIPTDIHQ.R.A            | 1            | F16P1_HUMAN          |
| P09467                                                                                | 2             | 4.5092           | R.APVILGSPDDVLEFLK.V           | 4            | F16P1_HUMAN          |
| <b><i>Fructose-bisphosphate aldolase A - Homo sapiens (Human)</i></b>                 |               |                  |                                |              |                      |
| P04075                                                                                | 2             | 4.8207           | K.GILAADESTGSIK.R              | 2            | ALDOA_HUMAN          |
| P04075                                                                                | 2             | 4.6548           | K.GILAADESTGSIK.R.L            | 3            | ALDOA_HUMAN          |
| P04075                                                                                | 3             | 4.8828           | K.GVVPLAGTNGETTTQGLDGLSER.C    | 2            | ALDOA_HUMAN          |
| P04075                                                                                | 3             | 4.161            | K.RLQSIGTENTEENRR.F            | 4            | ALDOA_HUMAN          |
| P04075                                                                                | 2             | 3.7339           | K.YTPSQGAGAAASESLFVSNHAY.-     | 2            | ALDOA_HUMAN          |
| P04075                                                                                | 2             | 3.911            | R.ALANSLACQGK.Y                | 1            | ALDOA_HUMAN          |
| P04075                                                                                | 2             | 2.8258           | R.LQSIGTENTEENRR.F             | 1            | ALDOA_HUMAN          |
| P04075                                                                                | 2             | 3.4031           | K.AAQEEYVKR.A                  | 4            | ALDOA_HUMAN          |
| <b><i>Fructose-bisphosphate aldolase C - Homo sapiens (Human)</i></b>                 |               |                  |                                |              |                      |
| P09972                                                                                | 2             | 3.7219           | K.YEGSGEDGGAAQSLYIANHAY.-      | 2            | ALDOC_HUMAN          |
| P09972                                                                                | 3             | 5.893            | K.VDKGVVPLAGTDGETTTQGLDGLSER.C | 1            | ALDOC_HUMAN          |
| P09972                                                                                | 3             | 6.2886           | K.GVVPLAGTDGETTTQGLDGLSER.C    | 6            | ALDOC_HUMAN          |
| P09972                                                                                | 2             | 3.6531           | R.DNAGAATEEFIK.R               | 1            | ALDOC_HUMAN          |
| <b><i>FYVE and coiled-coil domain-containing protein 1 - Homo sapiens (Human)</i></b> |               |                  |                                |              |                      |
| Q9BQS8                                                                                | 2             | 3.1315           | K.M#LADLDDLNRTKK.Y             | 1            | FYCO1_HUMAN          |
| Q9BQS8                                                                                | 2             | 2.9562           | R.EKKQQQEEK.E                  | 1            | FYCO1_HUMAN          |
| Q9BQS8                                                                                | 2             | 3.6792           | R.ESAIQGSLASLEAEQASIR.H        | 1            | FYCO1_HUMAN          |
| <b><i>FYVE, RhoGEF and PH domain-containing protein 4 - Homo sapiens (Human)</i></b>  |               |                  |                                |              |                      |
| Q96M96                                                                                | 2             | 2.9929           | R.HGLTTTPQQK.L                 | 2            | FGD4_HUMAN           |
| <b><i>FYVE, RhoGEF and PH domain-containing protein 5 - Homo sapiens (Human)</i></b>  |               |                  |                                |              |                      |
| Q6ZNL6                                                                                | 2             | 4.4408           | R.VPLREDEPKDEGSVGNK.A          | 4            | FGD5_HUMAN           |
| Q6ZNL6                                                                                | 2             | 2.9686           | K.GLESEQAPK.L                  | 2            | FGD5_HUMAN           |
| Q6ZNL6                                                                                | 2             | 4.0978           | K.TLLSLEGKPLEASR.A             | 2            | FGD5_HUMAN           |
| Q6ZNL6                                                                                | 3             | 4.2596           | R.SRPPFLPLPLTKPR.S             | 2            | FGD5_HUMAN           |
| <b><i>G patch domain and KOW motifs-containing protein - Homo sapiens (Human)</i></b> |               |                  |                                |              |                      |
| Q92917                                                                                | 2             | 5.9599           | K.EGVLP LTAASTAPISFGFTR.T      | 2            | GPKOW_HUMA           |
| Q92917                                                                                | 2             | 3.0057           | R.ELQSVKPEAPK.E                | 1            | GPKOW_HUMA           |
| <b><i>G patch domain-containing protein 1 - Homo sapiens (Human)</i></b>              |               |                  |                                |              |                      |

| <i>Accession No*</i>                                                                    | <i>Charge</i> | <i>XC(Max)**</i> | <i>Peptide*</i>             | <i>TC***</i> | <i>Reference No*</i> |
|-----------------------------------------------------------------------------------------|---------------|------------------|-----------------------------|--------------|----------------------|
| Q9BRR8                                                                                  | 2             | 3.2006           | R.QLAAATAPIPGATLLDDLITPAK.L | 1            | GPTC1_HUMAN          |
| Q9BRR8                                                                                  | 2             | 3.1569           | R.SLAQNAQSSR.A              | 1            | GPTC1_HUMAN          |
| <b><i>G patch domain-containing protein 8 - Homo sapiens (Human)</i></b>                |               |                  |                             |              |                      |
| Q9UKJ3                                                                                  | 2             | 3.3272           | K.ATGPPSQNSNIGTGR.G         | 1            | GPTC8_HUMAN          |
| <b><i>G protein-regulated inducer of neurite outgrowth 1 - Homo sapiens (Human)</i></b> |               |                  |                             |              |                      |
| Q7Z2K8                                                                                  | 2             | 4.7025           | K.ADAGPSGQGDSVSIK.V         | 2            | GRIN1_HUMAN          |
| <b><i>G protein-regulated inducer of neurite outgrowth 3 - Homo sapiens (Human)</i></b> |               |                  |                             |              |                      |
| Q6ZVF9                                                                                  | 2             | 2.8702           | K.KLAGTNSSSLK.A             | 1            | GRIN3_HUMAN          |
| Q6ZVF9                                                                                  | 2             | 2.9279           | R.SVSTSPSILTAFLK.E          | 1            | GRIN3_HUMAN          |
| Q6ZVF9                                                                                  | 2             | 3.9137           | R.APEHFEEQLR.V              | 3            | GRIN3_HUMAN          |
| Q6ZVF9                                                                                  | 3             | 4.5642           | R.VVSHSSSPVGGPEGER.Q        | 2            | GRIN3_HUMAN          |
| Q6ZVF9                                                                                  | 3             | 6.1984           | K.TSLIAASGKEDDLGEPQAASPR.H  | 3            | GRIN3_HUMAN          |
| Q6ZVF9                                                                                  | 2             | 2.762            | K.NQUESTLEENR.Q             | 1            | GRIN3_HUMAN          |
| Q6ZVF9                                                                                  | 2             | 2.7792           | K.FETRPSEFAEK.T             | 1            | GRIN3_HUMAN          |
| Q6ZVF9                                                                                  | 2             | 4.4277           | K.ADHSGSLDPTNKGDAR.E        | 1            | GRIN3_HUMAN          |
| Q6ZVF9                                                                                  | 2             | 3.5916           | K.SQESGGTESAANPTSPIR.K      | 1            | GRIN3_HUMAN          |
| Q6ZVF9                                                                                  | 2             | 4.7064           | K.SQESGGTESAANPTSPIRK.N     | 2            | GRIN3_HUMAN          |
| <b><i>Galectin-1 - Homo sapiens (Human)</i></b>                                         |               |                  |                             |              |                      |
| P09382                                                                                  | 1             | 2.7228           | K.LPDGYEFK.F                | 3            | LEG1_HUMAN           |
| P09382                                                                                  | 2             | 2.8151           | R.VRGEVAPDAK.S              | 3            | LEG1_HUMAN           |
| P09382                                                                                  | 2             | 3.9692           | R.LNLEAINYMAADGDFKIK.C      | 4            | LEG1_HUMAN           |
| P09382                                                                                  | 2             | 5.4494           | R.LNLEAINYMAADGDFK.I        | 30           | LEG1_HUMAN           |
| P09382                                                                                  | 2             | 5.3484           | R.LNLEAINYM#AADGDFK.I       | 4            | LEG1_HUMAN           |
| P09382                                                                                  | 1             | 2.2702           | R.GEVAPDAK.S                | 2            | LEG1_HUMAN           |
| P09382                                                                                  | 2             | 5.5314           | R.FNAHGDANTIVCNSK.D         | 8            | LEG1_HUMAN           |
| P09382                                                                                  | 2             | 4.11             | K.LPDGYEFKFPNR.L            | 4            | LEG1_HUMAN           |
| P09382                                                                                  | 4             | 5.7458           | K.FPNRLNLEAINYMAADGDFKIK.C  | 1            | LEG1_HUMAN           |
| P09382                                                                                  | 3             | 4.4802           | K.FPNRLNLEAINYMAADGDFK.I    | 1            | LEG1_HUMAN           |
| P09382                                                                                  | 2             | 3.643            | K.DGGAWGTEQR.E              | 8            | LEG1_HUMAN           |
| P09382                                                                                  | 1             | 2.7655           | K.SFVLNLGK.D                | 9            | LEG1_HUMAN           |
| <b><i>Galectin-2 - Homo sapiens (Human)</i></b>                                         |               |                  |                             |              |                      |
| P05162                                                                                  | 2             | 3.0887           | R.GGFNM#SSFK.L              | 2            | LEG2_HUMAN           |
| P05162                                                                                  | 2             | 3.442            | R.GGFNMSSFK.L               | 4            | LEG2_HUMAN           |
| P05162                                                                                  | 3             | 3.9553           | K.LPDGHELTFPNR.L            | 2            | LEG2_HUMAN           |
| <b><i>Galectin-3-binding protein precursor - Homo sapiens (Human)</i></b>               |               |                  |                             |              |                      |

| <i>Accession No*</i>                                                           | <i>Charge</i> | <i>XC(Max)**</i> | <i>Peptide*</i>                  | <i>TC***</i> | <i>Reference No*</i> |
|--------------------------------------------------------------------------------|---------------|------------------|----------------------------------|--------------|----------------------|
| Q08380                                                                         | 2             | 4.5011           | R.ELSEALGQIFDSQR.G               | 3            | LG3BP_HUMAN          |
| Q08380                                                                         | 2             | 4.3492           | R.LADGGATNQGR.V                  | 17           | LG3BP_HUMAN          |
| Q08380                                                                         | 2             | 3.1367           | R.SDLAVPSELALLK.A                | 1            | LG3BP_HUMAN          |
| Q08380                                                                         | 1             | 2.3237           | R.STHTLDLSR.E                    | 1            | LG3BP_HUMAN          |
| <b><i>Gamma-adducin - Homo sapiens (Human)</i></b>                             |               |                  |                                  |              |                      |
| Q9UEY8                                                                         | 3             | 4.0426           | K.SPEKIEEVLSPGSPSK.S             | 3            | ADDG_HUMAN           |
| Q9UEY8                                                                         | 3             | 4.3534           | K.VSGGTPIKIEDPNQFVPLNTPNEVLEKR.N | 2            | ADDG_HUMAN           |
| Q9UEY8                                                                         | 2             | 3.152            | R.WLNSPNTYMK.V                   | 1            | ADDG_HUMAN           |
| <b><i>Gamma-enolase - Homo sapiens (Human)</i></b>                             |               |                  |                                  |              |                      |
| P09104                                                                         | 2             | 4.107            | K.DATNVGDEGGFAPNILENSEALELVK.E   | 1            | ENOG_HUMAN           |
| <b><i>Gamma-glutamyl hydrolase precursor - Homo sapiens (Human)</i></b>        |               |                  |                                  |              |                      |
| Q92820                                                                         | 2             | 3.7405           | K.KPIIGILM#QK.C                  | 2            | GGH_HUMAN            |
| Q92820                                                                         | 3             | 3.7165           | K.KPIIGILMQK.C                   | 2            | GGH_HUMAN            |
| <b><i>Gamma-glutamyltranspeptidase 1 precursor - Homo sapiens (Human)</i></b>  |               |                  |                                  |              |                      |
| P19440                                                                         | 2             | 3.0639           | R.LFQPSIQLAR.Q                   | 1            | GGT1_HUMAN           |
| P19440                                                                         | 2             | 2.8993           | R.TVIEQQPVLCEVFCR.D              | 1            | GGT1_HUMAN           |
| P19440                                                                         | 2             | 2.8009           | K.GLAAALENKR.T                   | 1            | GGT1_HUMAN           |
| <b><i>Gamma-interferon-inducible protein Ifi-16 - Homo sapiens (Human)</i></b> |               |                  |                                  |              |                      |
| Q16666                                                                         | 2             | 3.055            | K.TSLSAPPNSSSTENPK.T             | 1            | IF16_HUMAN           |
| Q16666                                                                         | 2             | 3.1677           | R.TPQMPPTTPSSFFTK.K              | 1            | IF16_HUMAN           |
| <b><i>Gamma-synuclein - Homo sapiens (Human)</i></b>                           |               |                  |                                  |              |                      |
| O76070                                                                         | 3             | 4.0181           | K.TKEGVMYVGAK.T                  | 1            | SYUG_HUMAN           |
| O76070                                                                         | 3             | 4.3633           | K.TKEQANAVSEAVVSSVNTVATK.T       | 2            | SYUG_HUMAN           |
| O76070                                                                         | 2             | 3.7127           | K.TVEEAENIAVTSGVVR.K             | 2            | SYUG_HUMAN           |
| O76070                                                                         | 2             | 4.734            | K.TKENVVQSVTSVAEK.T              | 3            | SYUG_HUMAN           |
| O76070                                                                         | 2             | 4.4065           | K.EKEEVAEEAQSGGD.-               | 5            | SYUG_HUMAN           |
| O76070                                                                         | 2             | 4.9792           | K.TVEEAENIAVTSGVVRK.E            | 1            | SYUG_HUMAN           |
| O76070                                                                         | 1             | 2.4014           | K.EGVGAVEK.T                     | 2            | SYUG_HUMAN           |
| O76070                                                                         | 1             | 2.7905           | K.EGVMYVGAK.T                    | 2            | SYUG_HUMAN           |
| O76070                                                                         | 2             | 3.1389           | K.EQANAVSEAVVSSVNTVATK.T         | 1            | SYUG_HUMAN           |
| <b><i>GAS2-like protein 3 - Homo sapiens (Human)</i></b>                       |               |                  |                                  |              |                      |
| Q86XJ1                                                                         | 3             | 4.2825           | K.TIATGLGTQSQPSDGAPQAKPVAQK.L    | 4            | GA2L3_HUMAN          |
| Q86XJ1                                                                         | 2             | 2.9962           | K.VIPAQNSADLPESTLLPNK.C          | 1            | GA2L3_HUMAN          |
| <b><i>GatC-like protein - Homo sapiens (Human)</i></b>                         |               |                  |                                  |              |                      |
| O43716                                                                         | 2             | 2.749            | R.LALVDFGSR.E                    | 1            | GATCL_HUMAN          |

| <i>Accession No*</i>                                                           | <i>Charge</i> | <i>XC(Max)**</i> | <i>Peptide*</i>                      | <i>TC***</i> | <i>Reference No*</i> |
|--------------------------------------------------------------------------------|---------------|------------------|--------------------------------------|--------------|----------------------|
| O43716                                                                         | 2             | 3.1379           | K.LDEQEPPPHS.-                       | 2            | GATCL_HUMAN          |
| O43716                                                                         | 2             | 2.7414           | R.AVDTDGVPEMESVLEDR.C                | 1            | GATCL_HUMAN          |
| <b><i>GC-rich promoter-binding protein 1-like 1 - Homo sapiens (Human)</i></b> |               |                  |                                      |              |                      |
| Q9H751                                                                         | 2             | 3.2899           | K.LQFEEEDFPSLNPEAGK.Q                | 1            | Q9H751_HUMAN         |
| Q9H751                                                                         | 2             | 2.9118           | R.HDSVDSGVSK.G                       | 3            | Q9H751_HUMAN         |
| <b><i>GC-rich sequence DNA-binding factor - Homo sapiens (Human)</i></b>       |               |                  |                                      |              |                      |
| P16383                                                                         | 2             | 4.1041           | K.IPDAAFIQAAR.R                      | 4            | GCF_HUMAN            |
| <b><i>GDP-L-fucose synthetase - Homo sapiens (Human)</i></b>                   |               |                  |                                      |              |                      |
| Q13630                                                                         | 2             | 3.4301           | K.DADLTDTAQTR.A                      | 1            | FCL_HUMAN            |
| <b><i>Gelsolin precursor - Homo sapiens (Human)</i></b>                        |               |                  |                                      |              |                      |
| P06396                                                                         | 2             | 3.121            | R.GASQAGAPQGR.V                      | 2            | GELS_HUMAN           |
| <b><i>General transcription factor II-I - Homo sapiens (Human)</i></b>         |               |                  |                                      |              |                      |
| P78347                                                                         | 3             | 5.1192           | K.VPEIEVTVEGPNNNNPQTS AVR.T          | 3            | GTF2I_HUMAN          |
| <b><i>Gephyrin - Homo sapiens (Human)</i></b>                                  |               |                  |                                      |              |                      |
| Q9NQX3                                                                         | 2             | 3.7415           | R.DTASLSTTPSESPR.A                   | 2            | GEPH_HUMAN           |
| <b><i>GH3 domain-containing protein precursor - Homo sapiens (Human)</i></b>   |               |                  |                                      |              |                      |
| Q8N2G8                                                                         | 2             | 2.7724           | R.VAWGALVWAATWQRRR.L                 | 1            | GHDC_HUMAN           |
| <b><i>Girdin - Homo sapiens (Human)</i></b>                                    |               |                  |                                      |              |                      |
| Q3V6T2                                                                         | 3             | 5.8924           | R.SDSSEGFLQLPHQDSQDSSSVGSNSLEDGQ     | 2            | GRDN_HUMAN           |
| Q3V6T2                                                                         | 3             | 4.9799           | R.LPISVDSPPPAAADSNTTAAASNVDK VQESR.N | 1            | GRDN_HUMAN           |
| Q3V6T2                                                                         | 3             | 4.0818           | R.KTEDTYFISSAGKPTPGTQ GK.I           | 1            | GRDN_HUMAN           |
| <b><i>Glia maturation factor beta - Homo sapiens (Human)</i></b>               |               |                  |                                      |              |                      |
| P60983                                                                         | 2             | 3.131            | K.NKL VQTAELTK.V                     | 2            | GMFB_HUMAN           |
| <b><i>Glia maturation factor gamma - Homo sapiens (Human)</i></b>              |               |                  |                                      |              |                      |
| O60234                                                                         | 2             | 3.7758           | R.TDDLTEAWLQEK.L                     | 2            | GMFG_HUMAN           |
| <b><i>Glial fibrillary acidic protein - Homo sapiens (Human)</i></b>           |               |                  |                                      |              |                      |
| P14136                                                                         | 2             | 3.9177           | K.ALAAELNQLR.A                       | 1            | GFAP_HUMAN           |
| P14136                                                                         | 2             | 2.9412           | R.DGEVIKESK.Q                        | 1            | GFAP_HUMAN           |
| <b><i>Glucocorticoid receptor - Homo sapiens (Human)</i></b>                   |               |                  |                                      |              |                      |
| P04150                                                                         | 3             | 4.259            | K.THSDVSSEQQLK.G                     | 2            | GCR_HUMAN            |
| P04150                                                                         | 3             | 3.9904           | K.VMGNDLGFPPQQGQISLSSGETDLK LLEESIAN | 1            | GCR_HUMAN            |
| P04150                                                                         | 2             | 3.613            | K.SSASTAVSAAPEKEFPK.T                | 2            | GCR_HUMAN            |
| P04150                                                                         | 2             | 3.0923           | K.SSASTAVSAAPEK.E                    | 1            | GCR_HUMAN            |
| P04150                                                                         | 2             | 3.7603           | K.LLEESIANLNR.S                      | 2            | GCR_HUMAN            |
| P04150                                                                         | 2             | 4.006            | K.GSVSNAQQPDLSK.A                    | 2            | GCR_HUMAN            |

| <i>Accession No*</i>                                                                     | <i>Charge</i> | <i>XC(Max)**</i> | <i>Peptide*</i>                 | <i>TC***</i> | <i>Reference No*</i> |
|------------------------------------------------------------------------------------------|---------------|------------------|---------------------------------|--------------|----------------------|
| P04150                                                                                   | 2             | 3.962            | K.VSASSPSLAVASQSDSK.Q           | 3            | GCR_HUMAN            |
| <b><i>Glucocorticoid receptor DNA-binding factor 1 - Homo sapiens (Human)</i></b>        |               |                  |                                 |              |                      |
| Q9NRY4                                                                                   | 2             | 3.4605           | R.NEEENIYSVPHDSTQGK.I           | 1            | GRLF1_HUMAN          |
| Q9NRY4                                                                                   | 2             | 3.1289           | R.TSFSVGSDELPIR.K               | 1            | GRLF1_HUMAN          |
| <b><i>Glucocorticoid-induced transcript 1 protein - Homo sapiens (Human)</i></b>         |               |                  |                                 |              |                      |
| Q86VQ1                                                                                   | 2             | 3.7737           | K.LLGPLLPASDLMLK.N              | 3            | GLCI1_HUMAN          |
| Q86VQ1                                                                                   | 2             | 4.8182           | R.GPSPSSPTPPAAAAAPAEQAPR.A      | 2            | GLCI1_HUMAN          |
| <b><i>Glucose-6-phosphate isomerase - Homo sapiens (Human)</i></b>                       |               |                  |                                 |              |                      |
| P06744                                                                                   | 3             | 4.0088           | K.KIEPELDGSAQVTSHDASTNGLINFIK.Q | 1            | G6PI_HUMAN           |
| <b><i>Glucosidase 2 subunit beta precursor - Homo sapiens (Human)</i></b>                |               |                  |                                 |              |                      |
| P14314                                                                                   | 2             | 3.6539           | K.ETMVTSTTEPSR.C                | 2            | GLU2B_HUMAN          |
| P14314                                                                                   | 2             | 3.6265           | R.SLKDMESIR.N                   | 9            | GLU2B_HUMAN          |
| P14314                                                                                   | 2             | 2.7216           | R.NKFEEAER.S                    | 1            | GLU2B_HUMAN          |
| P14314                                                                                   | 4             | 4.7795           | K.LGGSPTSLGTWGSWIGPDHDKFSAMK.Y  | 2            | GLU2B_HUMAN          |
| P14314                                                                                   | 2             | 3.1524           | K.ETM#VTSTTEPSR.C               | 2            | GLU2B_HUMAN          |
| P14314                                                                                   | 2             | 3.6786           | K.YEQGTGCWQGPNR.S               | 3            | GLU2B_HUMAN          |
| <b><i>Glutamate dehydrogenase 1, mitochondrial precursor - Homo sapiens (Human)</i></b>  |               |                  |                                 |              |                      |
| P00367                                                                                   | 2             | 4.3921           | R.GASIVEDKLVEDLR.T              | 2            | DHE3_HUMAN           |
| <b><i>Glutaminase kidney isoform, mitochondrial precursor - Homo sapiens (Human)</i></b> |               |                  |                                 |              |                      |
| O94925                                                                                   | 2             | 3.4594           | K.DGPGETDAFGNSEGK.E             | 2            | GLSK_HUMAN           |
| <b><i>Glutamyl aminopeptidase - Homo sapiens (Human)</i></b>                             |               |                  |                                 |              |                      |
| Q07075                                                                                   | 2             | 3.2366           | R.ASLIDDAFALAR.A                | 2            | AMPE_HUMAN           |
| Q07075                                                                                   | 3             | 3.9304           | R.VNYEVATWDSIATALSLNHK.T        | 1            | AMPE_HUMAN           |
| <b><i>Glutaredoxin-1 - Homo sapiens (Human)</i></b>                                      |               |                  |                                 |              |                      |
| P35754                                                                                   | 2             | 3.6449           | R.LKQIGALQ.-                    | 6            | GLRX1_HUMAN          |
| P35754                                                                                   | 2             | 3.5876           | R.RAQEILSQLPIK.Q                | 2            | GLRX1_HUMAN          |
| P35754                                                                                   | 2             | 4.2529           | R.AQEILSQLPIK.Q                 | 4            | GLRX1_HUMAN          |
| P35754                                                                                   | 2             | 3.6318           | K.DCIGGCSDLVSLQQSGELLTR.L       | 2            | GLRX1_HUMAN          |
| <b><i>Glutaredoxin-related protein 5 - Homo sapiens (Human)</i></b>                      |               |                  |                                 |              |                      |
| Q86SX6                                                                                   | 3             | 4.8678           | R.DYAAYNVLDPELR.Q               | 3            | GLRX5_HUMAN          |
| Q86SX6                                                                                   | 2             | 3.9284           | K.LGIHSALLDEKDKQDSK.-           | 1            | GLRX5_HUMAN          |
| <b><i>Glutathione reductase, mitochondrial precursor - Homo sapiens (Human)</i></b>      |               |                  |                                 |              |                      |
| P00390                                                                                   | 3             | 4.1159           | K.ADFDNTVAIHPTSSEELVTLR.-       | 1            | GSHR_HUMAN           |
| <b><i>Glutathione S-transferase P - Homo sapiens (Human)</i></b>                         |               |                  |                                 |              |                      |
| P09211                                                                                   | 3             | 4.9566           | K.ALPGQLKPFETLLSQNQGGK.T        | 2            | GSTP1_HUMAN          |



| <i>Accession No*</i>                                                                            | <i>Charge</i> | <i>XC(Max)**</i> | <i>Peptide*</i>                 | <i>TC***</i> | <i>Reference No*</i> |
|-------------------------------------------------------------------------------------------------|---------------|------------------|---------------------------------|--------------|----------------------|
| <b><i>Glyceraldehyde-3-phosphate dehydrogenase - Homo sapiens (Human)</i></b>                   |               |                  |                                 |              |                      |
| P04406                                                                                          | 2             | 4.5706           | R.VVDLMAHMASKE.-                | 2            | G3P_HUMAN            |
| P04406                                                                                          | 2             | 4.5323           | K.LISWYDNEFGYSNR.V              | 12           | G3P_HUMAN            |
| P04406                                                                                          | 2             | 3.8913           | R.VVDLM#AHM#ASKE.-              | 4            | G3P_HUMAN            |
| P04406                                                                                          | 2             | 4.2421           | R.VVDLMAHM#ASKE.-               | 3            | G3P_HUMAN            |
| <b><i>Glycine cleavage system H protein, mitochondrial precursor - Homo sapiens (Human)</i></b> |               |                  |                                 |              |                      |
| P23434                                                                                          | 2             | 2.9195           | K.SCYEDGWLIK.M                  | 2            | GCSH_HUMAN           |
| P23434                                                                                          | 3             | 3.9008           | K.MTLNPNSELDELMSEEAYEKYIKSIEE.- | 2            | GCSH_HUMAN           |
| P23434                                                                                          | 2             | 3.3324           | K.M#TLNPNSELDELM#SEEAYEK.Y      | 2            | GCSH_HUMAN           |
| P23434                                                                                          | 3             | 3.878            | K.MTLNPNSELDELM#SEEAYEK.Y       | 2            | GCSH_HUMAN           |
| P23434                                                                                          | 3             | 3.784            | K.MTLNPNSELDELMSEEAYEK.Y        | 1            | GCSH_HUMAN           |
| <b><i>Glycogen phosphorylase, liver form - Homo sapiens (Human)</i></b>                         |               |                  |                                 |              |                      |
| P06737                                                                                          | 3             | 4.3399           | R.TIKEYAQNIWNVEPSDLK.I          | 1            | PYGL_HUMAN           |
| <b><i>Glycogenin-1 - Homo sapiens (Human)</i></b>                                               |               |                  |                                 |              |                      |
| P46976                                                                                          | 2             | 2.8303           | R.KLDTYLQ.-                     | 1            | GLYG_HUMAN           |
| P46976                                                                                          | 2             | 3.4819           | R.LVVLATPQVSDSMR.K              | 1            | GLYG_HUMAN           |
| P46976                                                                                          | 2             | 2.8742           | K.RPELGVTLTK.L                  | 2            | GLYG_HUMAN           |
| P46976                                                                                          | 2             | 2.9427           | K.GALVLGSSLK.Q                  | 2            | GLYG_HUMAN           |
| P46976                                                                                          | 3             | 6.7271           | K.ERWEQQQADYMGADSFNKR.K         | 2            | GLYG_HUMAN           |
| P46976                                                                                          | 3             | 3.9754           | R.RLVVLATPQVSDSMR.V             | 1            | GLYG_HUMAN           |
| <b><i>Glycosyltransferase 25 domain-containing protein 1 - Homo sapiens (Human)</i></b>         |               |                  |                                 |              |                      |
| Q8NBJ5                                                                                          | 2             | 4.3204           | K.NSDVLQSP LDSAARDEL.-          | 2            | Q8NBJ5_HUMA          |
| <b><i>Glycylpeptide N-tetradecanoyltransferase 1 - Homo sapiens (Human)</i></b>                 |               |                  |                                 |              |                      |
| P30419                                                                                          | 2             | 4.2968           | K.AIELFSVGQPAK.T                | 2            | NMT1_HUMAN           |
| P30419                                                                                          | 2             | 4.186            | K.EKGSETDSAQDQPVK.M             | 3            | NMT1_HUMAN           |
| P30419                                                                                          | 2             | 3.9569           | K.GSETDSAQDQPVK.M               | 4            | NMT1_HUMAN           |
| P30419                                                                                          | 1             | 3.1728           | R.GGLSPANDTGAK.K                | 7            | NMT1_HUMAN           |
| <b><i>GMP reductase 1 - Homo sapiens (Human)</i></b>                                            |               |                  |                                 |              |                      |
| P36959                                                                                          | 3             | 4.3713           | K.TVEVPYKGDVENTILDILGGLR.S      | 1            | GMPR1_HUMAN          |
| <b><i>Golgi phosphoprotein 3 - Homo sapiens (Human)</i></b>                                     |               |                  |                                 |              |                      |
| Q9H4A6                                                                                          | 2             | 4.2239           | R.AAGGGAGSSEDDAQRS.R            | 2            | GOLP3_HUMAN          |
| <b><i>Golgi phosphoprotein 4 - Homo sapiens (Human)</i></b>                                     |               |                  |                                 |              |                      |
| O00461                                                                                          | 2             | 3.0702           | R.QQEQQQQQVAR.E                 | 3            | GOLP4_HUMAN          |
| O00461                                                                                          | 2             | 3.9936           | K.FQSPYEEQLEQQR.L               | 2            | GOLP4_HUMAN          |
| <b><i>Golgi reassembly-stacking protein 2 - Homo sapiens (Human)</i></b>                        |               |                  |                                 |              |                      |

| <i>Accession No*</i>                                             | <i>Charge</i> | <i>XC(Max)**</i> | <i>Peptide*</i>                   | <i>TC***</i> | <i>Reference No*</i> |
|------------------------------------------------------------------|---------------|------------------|-----------------------------------|--------------|----------------------|
| Q9H8Y8                                                           | 2             | 3.2801           | K.ADAASSLTVDPPTAK.A               | 2            | GORS2_HUMAN          |
| Q9H8Y8                                                           | 3             | 5.7696           | K.APTTVEDRVGDSTPVSEKPVSAAVDANASES | 2            | GORS2_HUMAN          |
| Q9H8Y8                                                           | 2             | 3.2956           | R.VGDSTPVSEKPVSAAVDANASESP.-      | 1            | GORS2_HUMAN          |
| <b><i>Golgin subfamily A member 1 - Homo sapiens (Human)</i></b> |               |                  |                                   |              |                      |
| Q92805                                                           | 2             | 2.7235           | K.NILTAQLQEMK.N                   | 1            | GOGA1_HUMAN          |
| Q92805                                                           | 2             | 2.9677           | R.AADQTTAEQGM#R.Q                 | 2            | GOGA1_HUMAN          |
| Q92805                                                           | 2             | 3.883            | R.TQALEAQIVALER.M                 | 2            | GOGA1_HUMAN          |
| <b><i>Golgin subfamily A member 2 - Homo sapiens (Human)</i></b> |               |                  |                                   |              |                      |
| Q08379                                                           | 2             | 3.0099           | K.TFSSTESLR.Q                     | 3            | GOGA2_HUMAN          |
| Q08379                                                           | 2             | 4.2461           | R.VQELETSLAELR.N                  | 3            | GOGA2_HUMAN          |
| Q08379                                                           | 2             | 3.6824           | R.ELKEQLAELQSGFVK.L               | 2            | GOGA2_HUMAN          |
| Q08379                                                           | 2             | 2.9303           | R.AAELWGEQAEAR.R                  | 2            | GOGA2_HUMAN          |
| Q08379                                                           | 2             | 3.5069           | K.AGMQLNLEELQK.K                  | 2            | GOGA2_HUMAN          |
| Q08379                                                           | 3             | 3.7686           | K.NTQSNEDLKQEKSELEEK.L            | 1            | GOGA2_HUMAN          |
| Q08379                                                           | 2             | 3.9054           | K.NTQSNEDLKQEK.S                  | 1            | GOGA2_HUMAN          |
| Q08379                                                           | 2             | 4.6317           | K.LLELQELVLR.L                    | 4            | GOGA2_HUMAN          |
| Q08379                                                           | 2             | 3.6685           | K.SQEAQSLQQQR.D                   | 1            | GOGA2_HUMAN          |
| Q08379                                                           | 2             | 2.7024           | R.DNPTAQQIM#QLLR.E                | 1            | GOGA2_HUMAN          |
| <b><i>Golgin subfamily A member 3 - Homo sapiens (Human)</i></b> |               |                  |                                   |              |                      |
| Q08378                                                           | 3             | 4.4186           | R.IQALEAELQAVSHSK.T               | 1            | GOGA3_HUMAN          |
| Q08378                                                           | 2             | 3.4375           | R.LFSTLDPELM#LNPNENLPR.A          | 2            | GOGA3_HUMAN          |
| Q08378                                                           | 3             | 4.7369           | R.LFSTLDPELMNPNENLPR.A            | 2            | GOGA3_HUMAN          |
| Q08378                                                           | 2             | 2.84             | R.LGSDLTSAQK.E                    | 1            | GOGA3_HUMAN          |
| Q08378                                                           | 2             | 3.5626           | R.MADSAASLEQQLEQVK.L              | 1            | GOGA3_HUMAN          |
| Q08378                                                           | 3             | 3.8665           | R.MADSAASLEQQLEQVKLTLLQR.D        | 1            | GOGA3_HUMAN          |
| Q08378                                                           | 2             | 4.0429           | R.QQMTALQSQLQQVQLER.T             | 1            | GOGA3_HUMAN          |
| Q08378                                                           | 2             | 3.1104           | R.RLQEALAAK.E                     | 3            | GOGA3_HUMAN          |
| Q08378                                                           | 2             | 2.8486           | R.EQSLDALQTHYDELQAR.L             | 1            | GOGA3_HUMAN          |
| Q08378                                                           | 2             | 4.4984           | R.QWYQQQLALAEAR.V                 | 3            | GOGA3_HUMAN          |
| Q08378                                                           | 2             | 2.9711           | R.QDSLSEVDTLK.Q                   | 1            | GOGA3_HUMAN          |
| Q08378                                                           | 3             | 3.7417           | K.DNTVHDLRQQMTALQSQLQQVQLER.T     | 1            | GOGA3_HUMAN          |
| Q08378                                                           | 2             | 4.075            | R.DATSKDQLISELK.A                 | 2            | GOGA3_HUMAN          |
| Q08378                                                           | 2             | 3.1651           | K.ASQAEISSLQSVR.Q                 | 2            | GOGA3_HUMAN          |
| Q08378                                                           | 2             | 2.9139           | K.EAADAELGQLR.A                   | 1            | GOGA3_HUMAN          |
| Q08378                                                           | 2             | 4.1981           | K.LTGLGQSNAALR.E                  | 5            | GOGA3_HUMAN          |

| <i>Accession No*</i>                                             | <i>Charge</i> | <i>XC(Max)**</i> | <i>Peptide*</i>                 | <i>TC***</i> | <i>Reference No*</i> |
|------------------------------------------------------------------|---------------|------------------|---------------------------------|--------------|----------------------|
| Q08378                                                           | 2             | 3.783            | K.NASLASSNNDLQVAEEQYQR.L        | 1            | GOGA3_HUMAN          |
| Q08378                                                           | 2             | 3.7064           | K.QLTLTQEALQSR.E                | 2            | GOGA3_HUMAN          |
| Q08378                                                           | 3             | 3.9829           | K.SGQVEHLQQETAALKK.Q            | 2            | GOGA3_HUMAN          |
| Q08378                                                           | 2             | 3.3907           | K.TLLQQNQQLK.L                  | 5            | GOGA3_HUMAN          |
| Q08378                                                           | 3             | 4.7955           | K.TRLFSTLDPELMLNPENLPR.A        | 3            | GOGA3_HUMAN          |
| Q08378                                                           | 2             | 3.0949           | R.AMTDLQNMLEAK.N                | 2            | GOGA3_HUMAN          |
| <b><i>Golgin subfamily A member 5 - Homo sapiens (Human)</i></b> |               |                  |                                 |              |                      |
| Q8TBA6                                                           | 2             | 3.7776           | R.SKETQEELNK.A                  | 2            | GOGA5_HUMAN          |
| Q8TBA6                                                           | 2             | 2.8569           | R.KDNASNIYSK.N                  | 1            | GOGA5_HUMAN          |
| <b><i>Golgin subfamily B member 1 - Homo sapiens (Human)</i></b> |               |                  |                                 |              |                      |
| Q14789                                                           | 2             | 2.7252           | R.SSSSQTQPLK.V                  | 1            | GOGB1_HUMAN          |
| Q14789                                                           | 3             | 4.1737           | R.KLEEHEESLVGR.A                | 1            | GOGB1_HUMAN          |
| Q14789                                                           | 3             | 6.5244           | R.APLDPELHQESDMEFNNTTQEDVQER.L  | 2            | GOGB1_HUMAN          |
| Q14789                                                           | 3             | 5.8488           | R.AQVVDLLQQELTAAEQR.N           | 1            | GOGB1_HUMAN          |
| Q14789                                                           | 2             | 3.4883           | R.IVGDYQQLEER.H                 | 2            | GOGB1_HUMAN          |
| Q14789                                                           | 3             | 4.4124           | R.KFSDAIQSKEEEIR.L              | 1            | GOGB1_HUMAN          |
| Q14789                                                           | 3             | 5.4185           | R.APLDPELHQESDM#EFNNTTQEDVQER.L | 1            | GOGB1_HUMAN          |
| Q14789                                                           | 2             | 2.805            | R.KLQAALISR.K                   | 1            | GOGB1_HUMAN          |
| Q14789                                                           | 3             | 4.1362           | R.LALLQEERDKLITEMDR.S           | 2            | GOGB1_HUMAN          |
| Q14789                                                           | 3             | 4.3318           | R.LSGLANVVLHELSGDDDTDQNMNR.A    | 1            | GOGB1_HUMAN          |
| Q14789                                                           | 2             | 2.9527           | R.NETETAER.V                    | 2            | GOGB1_HUMAN          |
| Q14789                                                           | 2             | 3.3776           | K.TLKEQLNLLSR.A                 | 2            | GOGB1_HUMAN          |
| Q14789                                                           | 4             | 6.0456           | R.RLDYESQTAHDNLLTEQIHLSLIEAK.S  | 1            | GOGB1_HUMAN          |
| Q14789                                                           | 2             | 3.6593           | K.LSSQITLLEAQNR.T               | 2            | GOGB1_HUMAN          |
| Q14789                                                           | 3             | 5.3149           | R.TGEADREVSEISIVDIANKR.S        | 2            | GOGB1_HUMAN          |
| Q14789                                                           | 3             | 3.7312           | R.VKMEYETLSK.K                  | 1            | GOGB1_HUMAN          |
| Q14789                                                           | 2             | 3.4885           | R.NTVETEREESK.I                 | 2            | GOGB1_HUMAN          |
| Q14789                                                           | 3             | 4.67             | K.KEEDVSYLSGQLSEKEAALTK.I       | 2            | GOGB1_HUMAN          |
| Q14789                                                           | 3             | 5.0379           | K.AKEISNLNQLIEEFKK.N            | 2            | GOGB1_HUMAN          |
| Q14789                                                           | 2             | 3.2544           | K.AQTEVQLQQK.V                  | 2            | GOGB1_HUMAN          |
| Q14789                                                           | 3             | 4.0755           | K.DVQLQQKDEALQEER.K             | 2            | GOGB1_HUMAN          |
| Q14789                                                           | 2             | 4.1394           | K.MNLLNQQIQEELSR.V              | 2            | GOGB1_HUMAN          |
| Q14789                                                           | 2             | 3.7289           | K.IQTEIIEQEDLIK.A               | 2            | GOGB1_HUMAN          |
| Q14789                                                           | 3             | 3.8924           | K.SLADVESQVSAQNKEKDTVLGR.L      | 1            | GOGB1_HUMAN          |
| Q14789                                                           | 2             | 2.9983           | K.KLQEALTSR.K                   | 1            | GOGB1_HUMAN          |
| Q14789                                                           | 2             | 4.139            | K.LAAEEQFQALVK.Q                | 2            | GOGB1_HUMAN          |

| <i>Accession No*</i>                                                                 | <i>Charge</i> | <i>XC(Max)**</i> | <i>Peptide*</i>                   | <i>TC***</i> | <i>Reference No*</i> |
|--------------------------------------------------------------------------------------|---------------|------------------|-----------------------------------|--------------|----------------------|
| Q14789                                                                               | 2             | 4.1313           | K.LITSNTDASDGDSVALVK.E            | 1            | GOGB1_HUMAN          |
| Q14789                                                                               | 3             | 4.4447           | K.LKETAEEEKDDLEER.L               | 2            | GOGB1_HUMAN          |
| Q14789                                                                               | 3             | 6.9884           | K.LLQDKNEQAVQSAQTIQQLEDQLQK.S     | 2            | GOGB1_HUMAN          |
| Q14789                                                                               | 2             | 3.6001           | K.M#NLLNQIQEELSR.V                | 2            | GOGB1_HUMAN          |
| Q14789                                                                               | 3             | 4.7898           | K.NKEFSQTLENEKNTLLSQISTK.D        | 1            | GOGB1_HUMAN          |
| Q14789                                                                               | 3             | 3.8555           | K.QM#NQTLDQKTNQIDLLQAEISENQAIQK.L | 1            | GOGB1_HUMAN          |
| Q14789                                                                               | 2             | 3.1226           | K.GLTAQIQSFGR.S                   | 1            | GOGB1_HUMAN          |
| <b><i>G-protein coupled receptor 98 precursor - Homo sapiens (Human)</i></b>         |               |                  |                                   |              |                      |
| Q8WXG9                                                                               | 2             | 3.1444           | R.FTIQLISIDEVEISPVK.G             | 1            | GPR98_HUMAN          |
| <b><i>Grainyhead-like protein 1 homolog - Homo sapiens (Human)</i></b>               |               |                  |                                   |              |                      |
| Q9NZI5                                                                               | 2             | 2.9399           | K.ESEEVFDALM#LKTPSLK.G            | 1            | GRHL1_HUMAN          |
| <b><i>GRAM domain-containing protein 3 - Homo sapiens (Human)</i></b>                |               |                  |                                   |              |                      |
| Q96HH9                                                                               | 3             | 4.3985           | R.SPTAQSPTPSVEADSPDQKK.I          | 2            | GRAM3_HUMAN          |
| <b><i>GRB2-associated-binding protein 1 - Homo sapiens (Human)</i></b>               |               |                  |                                   |              |                      |
| Q13480                                                                               | 3             | 5.3549           | K.SSGSGSSVADERVDYVVVDQKQK.T       | 1            | GAB1_HUMAN           |
| Q13480                                                                               | 2             | 3.2596           | R.SNTISTVDLNK.L                   | 1            | GAB1_HUMAN           |
| Q13480                                                                               | 2             | 4.5571           | R.APSASVDSSLYNLPR.S               | 1            | GAB1_HUMAN           |
| <b><i>GRB2-associated-binding protein 2 - Homo sapiens (Human)</i></b>               |               |                  |                                   |              |                      |
| Q9UQC2                                                                               | 2             | 4.1776           | K.TQALQNTMQEWDVDR.Q               | 2            | GAB2_HUMAN           |
| <b><i>GRB2-related adapter protein 2 - Homo sapiens (Human)</i></b>                  |               |                  |                                   |              |                      |
| O75791                                                                               | 2             | 3.7595           | K.LGLFPANYVAPMTR.-                | 3            | GRAP2_HUMAN          |
| <b><i>GRINL1A downstream protein Gdown3 - Homo sapiens (Human)</i></b>               |               |                  |                                   |              |                      |
| Q6EEV7                                                                               | 3             | 4.0116           | R.GLGAAEFGGAAGNVEAPGETFAQRK.I     | 1            | Q6EEV7_HUMA          |
| <b><i>Growth factor receptor-bound protein 2 - Homo sapiens (Human)</i></b>          |               |                  |                                   |              |                      |
| P62993                                                                               | 2             | 2.824            | R.ESESAPGDFSLSVK.F                | 2            | GRB2_HUMAN           |
| P62993                                                                               | 2             | 2.797            | R.NQQIFLR.D                       | 1            | GRB2_HUMAN           |
| P62993                                                                               | 2             | 2.7572           | R.AKAEEMLSK.Q                     | 1            | GRB2_HUMAN           |
| P62993                                                                               | 3             | 3.8858           | K.FNSLNELVDYHR.S                  | 1            | GRB2_HUMAN           |
| <b><i>GrpE protein homolog 1, mitochondrial precursor - Homo sapiens (Human)</i></b> |               |                  |                                   |              |                      |
| Q9HAV7                                                                               | 2             | 3.2433           | K.DLLEVADVLEK.A                   | 1            | GRPE1_HUMAN          |
| <b><i>GTPase IMAP family member 1 - Homo sapiens (Human)</i></b>                     |               |                  |                                   |              |                      |
| Q8WWP7                                                                               | 2             | 2.7452           | K.MATDEENVYGLEENAQSR.Q            | 1            | GIMA1_HUMAN          |
| <b><i>GTPase-activating protein ZNF289 - Homo sapiens (Human)</i></b>                |               |                  |                                   |              |                      |
| Q8N6H7                                                                               | 2             | 4.6503           | K.YKDNPFSLGESFGSR.W               | 6            | ZN289_HUMAN          |
| Q8N6H7                                                                               | 2             | 4.2548           | R.LAYQELQIDR.K                    | 8            | ZN289_HUMAN          |

| <i>Accession No*</i>                                                                                         | <i>Charge</i> | <i>XC(Max)**</i> | <i>Peptide*</i>                 | <i>TC***</i> | <i>Reference No*</i> |
|--------------------------------------------------------------------------------------------------------------|---------------|------------------|---------------------------------|--------------|----------------------|
| Q8N6H7                                                                                                       | 3             | 5.0429           | R.SSVSHSVLSEMQVIEQETPVSAK.S     | 3            | ZN289_HUMAN          |
| Q8N6H7                                                                                                       | 2             | 3.2396           | R.SSGLESSEAR.Q                  | 4            | ZN289_HUMAN          |
| Q8N6H7                                                                                                       | 3             | 4.4603           | R.SQLDLFDDVGTFFASGPPK.Y         | 1            | ZN289_HUMAN          |
| Q8N6H7                                                                                                       | 2             | 2.9874           | R.LGMGLVSR.S                    | 2            | ZN289_HUMAN          |
| Q8N6H7                                                                                                       | 2             | 2.7674           | R.LGM#GLVSR.S                   | 1            | ZN289_HUMAN          |
| Q8N6H7                                                                                                       | 2             | 3.5864           | K.QAEESMVASMR.L                 | 3            | ZN289_HUMAN          |
| Q8N6H7                                                                                                       | 2             | 3.0928           | K.QAEESM#VASMR.L                | 2            | ZN289_HUMAN          |
| Q8N6H7                                                                                                       | 2             | 4.105            | K.LREQQAADAKK.Q                 | 2            | ZN289_HUMAN          |
| Q8N6H7                                                                                                       | 2             | 3.3714           | K.LREQQAADAK.K                  | 1            | ZN289_HUMAN          |
| Q8N6H7                                                                                                       | 2             | 2.947            | K.KLQNLEGK.K                    | 2            | ZN289_HUMAN          |
| Q8N6H7                                                                                                       | 2             | 3.2686           | K.AISSDMFFGR.E                  | 3            | ZN289_HUMAN          |
| Q8N6H7                                                                                                       | 2             | 3.3776           | K.VSSQSFSEIER.Q                 | 3            | ZN289_HUMAN          |
| <b><i>GTP-binding nuclear protein Ran - Homo sapiens (Human)</i></b>                                         |               |                  |                                 |              |                      |
| P62826                                                                                                       | 3             | 4.3475           | K.SNYNFEKPFLLWLAR.K             | 1            | RAN_HUMAN            |
| <b><i>GTP-binding protein 1 - Homo sapiens (Human)</i></b>                                                   |               |                  |                                 |              |                      |
| O00178                                                                                                       | 3             | 7.9849           | K.RDEGGPSSGPAVGAPPPGDEASSVGAGQP | 1            | GTPB1_HUMAN          |
| <b><i>Guanine nucleotide-binding protein G(I)/G(S)/G(O) gamma-12 subunit precursor - Homo sapiens (</i></b>  |               |                  |                                 |              |                      |
| Q9UBI6                                                                                                       | 2             | 4.0199           | K.TASTNIIAQR.R                  | 3            | GBG12_HUMAN          |
| Q9UBI6                                                                                                       | 2             | 2.8898           | R.RTVQQLR.L                     | 1            | GBG12_HUMAN          |
| <b><i>Guanylate cyclase soluble subunit alpha-3 - Homo sapiens (Human)</i></b>                               |               |                  |                                 |              |                      |
| Q02108                                                                                                       | 2             | 3.5918           | K.DVEDGNANFLGK.A                | 1            | GCYA3_HUMAN          |
| <b><i>H/ACA ribonucleoprotein complex subunit 2 - Homo sapiens (Human)</i></b>                               |               |                  |                                 |              |                      |
| Q9NX24                                                                                                       | 3             | 3.8122           | R.TYQELLVNQNPIAQPLASR.R         | 1            | NOLA2_HUMAN          |
| <b><i>H/ACA ribonucleoprotein complex subunit 4 - Homo sapiens (Human)</i></b>                               |               |                  |                                 |              |                      |
| O60832                                                                                                       | 2             | 4.5263           | K.AGLES GAEPGDGSDTTK.K          | 9            | DKC1_HUMAN           |
| O60832                                                                                                       | 3             | 3.8989           | K.AGLES GAEPGDGSDTTKK.K         | 1            | DKC1_HUMAN           |
| O60832                                                                                                       | 1             | 2.7191           | K.APQVVAEAAK.T                  | 1            | DKC1_HUMAN           |
| <b><i>Haptoglobin precursor [Contains: Haptoglobin alpha chain; Haptoglobin beta chain] - Homo sapie</i></b> |               |                  |                                 |              |                      |
| P00738                                                                                                       | 2             | 4.9684           | K.LRTEGDGVYTLNNEK.Q             | 1            | HPT_HUMAN            |
| P00738                                                                                                       | 3             | 4.263            | K.LRTEGDGVYTLNNEKQWINK.A        | 1            | HPT_HUMAN            |
| P00738                                                                                                       | 2             | 3.5436           | R.TEGDGVYTLNNEK.Q               | 4            | HPT_HUMAN            |
| P00738                                                                                                       | 2             | 3.0903           | R.TEGDGVYTLNNEKQWINK.A          | 1            | HPT_HUMAN            |
| <b><i>HBS1-like protein - Homo sapiens (Human)</i></b>                                                       |               |                  |                                 |              |                      |
| Q9Y450                                                                                                       | 2             | 4.7207           | K.GPIEDAIASSDVLETASK.S          | 2            | HBS1L_HUMAN          |
| Q9Y450                                                                                                       | 3             | 4.1667           | K.SANPPHTIQASEEQSSTPAPVKK.S     | 1            | HBS1L_HUMAN          |

| <i>Accession No*</i>                                                     | <i>Charge</i> | <i>XC(Max)**</i> | <i>Peptide*</i>                    | <i>TC***</i> | <i>Reference No*</i> |
|--------------------------------------------------------------------------|---------------|------------------|------------------------------------|--------------|----------------------|
| <b><i>HCLS1-binding protein 3 - Homo sapiens (Human)</i></b>             |               |                  |                                    |              |                      |
| Q53T59                                                                   | 2             | 3.8051           | R.LTIFDEEVDPEGLFGPGR.K             | 1            | Q53T59_HUMAN         |
| <b><i>HCV F-transactivated protein 1 - Homo sapiens (Human)</i></b>      |               |                  |                                    |              |                      |
| Q6J203                                                                   | 2             | 2.7316           | R.RGFSEGGR.Q                       | 1            | Q6J203_HUMAN         |
| <b><i>HD domain-containing protein 3 - Homo sapiens (Human)</i></b>      |               |                  |                                    |              |                      |
| Q8N4P3                                                                   | 3             | 4.5256           | R.RLVEEVTDDKTLPK.L                 | 1            | HDDC3_HUMAN          |
| <b><i>Headcase protein homolog - Homo sapiens (Human)</i></b>            |               |                  |                                    |              |                      |
| Q9UBI9                                                                   | 3             | 6.0385           | R.SPGGSPGQSPTTGYSILSPAHFSGPR.S     | 1            | HDC_HUMAN            |
| <b><i>Heat shock 70 kDa protein 4 - Homo sapiens (Human)</i></b>         |               |                  |                                    |              |                      |
| P34932                                                                   | 3             | 3.8031           | K.IRFQESEERPK.L                    | 1            | HSP74_HUMAN          |
| P34932                                                                   | 3             | 4.3938           | K.NKEDQYDHLDAADMTK.V               | 2            | HSP74_HUMAN          |
| P34932                                                                   | 1             | 2.7129           | K.NLGQPIK.I                        | 3            | HSP74_HUMAN          |
| P34932                                                                   | 2             | 3.1297           | K.STNEAMEWMNNK.L                   | 2            | HSP74_HUMAN          |
| P34932                                                                   | 2             | 3.8051           | K.STNEAMEWMNNKLNLNQNK.Q            | 1            | HSP74_HUMAN          |
| P34932                                                                   | 2             | 2.9117           | R.DKLSGEYEK.F                      | 1            | HSP74_HUMAN          |
| <b><i>Heat shock cognate 71 kDa protein - Homo sapiens (Human)</i></b>   |               |                  |                                    |              |                      |
| P11142                                                                   | 2             | 4.3039           | K.NSLESYAFNM#K.A                   | 6            | HSP7C_HUMAN          |
| P11142                                                                   | 2             | 4.173            | K.NSLESYAFNMK.A                    | 8            | HSP7C_HUMAN          |
| <b><i>Heat shock factor-binding protein 1 - Homo sapiens (Human)</i></b> |               |                  |                                    |              |                      |
| O75506                                                                   | 3             | 6.5321           | R.IDDLEKNIADLMTQAGVEELENKIPATQK.S  | 2            | HSBP1_HUMAN          |
| O75506                                                                   | 3             | 4.2432           | K.TVQDLTSSVVQTLQMQDK.F             | 1            | HSBP1_HUMAN          |
| <b><i>Heat shock protein 90Ae - Homo sapiens (Human)</i></b>             |               |                  |                                    |              |                      |
| Q58FG0                                                                   | 3             | 3.984            | R.M#IKLGLGVDEYDPTANDINAAITKEMPLR.G | 1            | Q58FG0_HUMA          |
| <b><i>Heat shock protein beta-1 - Homo sapiens (Human)</i></b>           |               |                  |                                    |              |                      |
| P04792                                                                   | 2             | 6.0532           | R.AQLGGPEAAKSDETAAK.-              | 14           | HSPB1_HUMAN          |
| P04792                                                                   | 2             | 2.9477           | R.QLSSGVSEIR.H                     | 2            | HSPB1_HUMAN          |
| P04792                                                                   | 2             | 5.4446           | R.PLPAAIESPAVAAPAYS.R              | 12           | HSPB1_HUMAN          |
| P04792                                                                   | 2             | 4.2523           | R.LFDQAFGLPR.L                     | 7            | HSPB1_HUMAN          |
| P04792                                                                   | 2             | 4.395            | K.HEERQDEHGYISR.C                  | 3            | HSPB1_HUMAN          |
| P04792                                                                   | 3             | 7.6576           | R.KYTLPPGVDPTQVSSSLSPGTLTVEAPMPK.  | 6            | HSPB1_HUMAN          |
| P04792                                                                   | 2             | 5.2546           | R.VSLDVNHFAPDELTVK.T               | 13           | HSPB1_HUMAN          |
| P04792                                                                   | 3             | 5.9862           | R.KYTLPPGVDPTQVSSSLSPGTLTVEAPM#P   | 4            | HSPB1_HUMAN          |
| P04792                                                                   | 3             | 3.7004           | R.GPSWDPFRDWYPHSR.L                | 1            | HSPB1_HUMAN          |
| P04792                                                                   | 1             | 2.5629           | R.AQLGGPEAAK.S                     | 2            | HSPB1_HUMAN          |
| P04792                                                                   | 3             | 6.4212           | K.YTLPPGVDPTQVSSSLSPGTLTVEAPM#PK.  | 1            | HSPB1_HUMAN          |

| <i>Accession No*</i>                                                                         | <i>Charge</i> | <i>XC(Max)**</i> | <i>Peptide*</i>                   | <i>TC***</i> | <i>Reference No*</i> |
|----------------------------------------------------------------------------------------------|---------------|------------------|-----------------------------------|--------------|----------------------|
| P04792                                                                                       | 3             | 4.9323           | K.TKDGVEITGKHEER.Q                | 8            | HSPB1_HUMAN          |
| P04792                                                                                       | 2             | 4.2001           | K.LATQSNEITIPVTFESR.A             | 54           | HSPB1_HUMAN          |
| P04792                                                                                       | 3             | 3.9608           | K.DGVVEITGKHEERQDEHGYSR.C         | 1            | HSPB1_HUMAN          |
| P04792                                                                                       | 2             | 4.2216           | K.DGVVEITGKHEER.Q                 | 4            | HSPB1_HUMAN          |
| P04792                                                                                       | 2             | 3.9372           | K.DGVVEITGK.H                     | 10           | HSPB1_HUMAN          |
| P04792                                                                                       | 2             | 4.0239           | K.TKDGVEITGK.H                    | 12           | HSPB1_HUMAN          |
| <b><i>Heat shock protein beta-6 - Homo sapiens (Human)</i></b>                               |               |                  |                                   |              |                      |
| O14558                                                                                       | 2             | 2.9841           | K.HFSPEEIAVK.V                    | 2            | HSPB6_HUMAN          |
| O14558                                                                                       | 3             | 5.7427           | R.YRLPPGVDPAAVTSALSPEGVLSIQAAPASA | 1            | HSPB6_HUMAN          |
| <b><i>Heat shock protein beta-8 - Homo sapiens (Human)</i></b>                               |               |                  |                                   |              |                      |
| Q9UJY1                                                                                       | 3             | 4.4725           | K.HEEKQEGGIVSK.N                  | 2            | HSPB8_HUMAN          |
| <b><i>Heat shock protein HSP 90-beta - Homo sapiens (Human)</i></b>                          |               |                  |                                   |              |                      |
| P08238                                                                                       | 3             | 4.0822           | K.HLEINPDHPIVETLR.Q               | 1            | HS90B_HUMAN          |
| P08238                                                                                       | 2             | 3.2323           | R.NPDDITQEEYGEFYK.S               | 1            | HS90B_HUMAN          |
| <b><i>Heat shock-related 70 kDa protein 2 - Homo sapiens (Human)</i></b>                     |               |                  |                                   |              |                      |
| P54652                                                                                       | 2             | 2.8432           | K.NALESYTYNIK.Q                   | 2            | HSP72_HUMAN          |
| <b><i>Hematological and neurological expressed 1 protein - Homo sapiens (Human)</i></b>      |               |                  |                                   |              |                      |
| Q9UK76                                                                                       | 2             | 4.1996           | K.M#ASNIFGTPEENQASWAK.S           | 1            | HN1_HUMAN            |
| Q9UK76                                                                                       | 2             | 4.4695           | K.SSGGREDLESSGLQR.R               | 7            | HN1_HUMAN            |
| Q9UK76                                                                                       | 3             | 6.5639           | R.VLRPPGGGSNFSLGFDEPTEQPVRK.N     | 6            | HN1_HUMAN            |
| <b><i>Hematological and neurological expressed 1-like protein - Homo sapiens (Human)</i></b> |               |                  |                                   |              |                      |
| Q9H910                                                                                       | 3             | 4.4255           | R.M#ASNIFGPTTEEPQNIPKR.T          | 1            | HN1L_HUMAN           |
| Q9H910                                                                                       | 2             | 2.7066           | R.SIPAGAEPGEKGSAR.K               | 1            | HN1L_HUMAN           |
| Q9H910                                                                                       | 2             | 3.4604           | R.MASNIFGPTTEEPQNIPK.R            | 4            | HN1L_HUMAN           |
| Q9H910                                                                                       | 2             | 4.1181           | R.M#ASNIFGPTTEEPQNIPK.R           | 6            | HN1L_HUMAN           |
| Q9H910                                                                                       | 1             | 2.4033           | R.LAHPNPKK.D                      | 1            | HN1L_HUMAN           |
| Q9H910                                                                                       | 3             | 5.5024           | R.KAGPAKEQEPMPPTVDSHEPR.L         | 4            | HN1L_HUMAN           |
| Q9H910                                                                                       | 2             | 4.8778           | K.TSDIFGSPVTATSR.L                | 7            | HN1L_HUMAN           |
| Q9H910                                                                                       | 2             | 2.964            | K.EQEPMPPTVDSHEPR.L               | 1            | HN1L_HUMAN           |
| Q9H910                                                                                       | 2             | 2.8366           | K.EQEPMPPTVDSHEPR.L               | 1            | HN1L_HUMAN           |
| Q9H910                                                                                       | 3             | 3.8101           | K.DHVFLCEGEEPKSDLK.A              | 1            | HN1L_HUMAN           |
| Q9H910                                                                                       | 3             | 4.343            | K.AGPAKEQEPMPPTVDSHEPR.L          | 2            | HN1L_HUMAN           |
| Q9H910                                                                                       | 1             | 2.6283           | R.SIPAGAEPGEK.G                   | 1            | HN1L_HUMAN           |
| <b><i>Hematopoietic lineage cell-specific protein - Homo sapiens (Human)</i></b>             |               |                  |                                   |              |                      |
| P14317                                                                                       | 3             | 4.8686           | R.VDKSAVGFNEMEAPTTAYK.K           | 3            | HCLS1_HUMAN          |

| <i>Accession No*</i>                                                                      | <i>Charge</i> | <i>XC(Max)**</i> | <i>Peptide*</i>                  | <i>TC***</i> | <i>Reference No*</i> |
|-------------------------------------------------------------------------------------------|---------------|------------------|----------------------------------|--------------|----------------------|
| P14317                                                                                    | 3             | 4.8078           | K.SAVGHEYVAEVEKHSSQTDAAK.G       | 3            | HCLS1_HUMAN          |
| P14317                                                                                    | 3             | 4.8356           | K.SVVGHDVSVSVETQGDDWDTDPDFVNDISE | 2            | HCLS1_HUMAN          |
| P14317                                                                                    | 3             | 6.0584           | K.SVVGHDVSVSVETQGDDWDTDPDFVNDISE | 2            | HCLS1_HUMAN          |
| P14317                                                                                    | 2             | 3.8209           | K.TTPIEAASSGAR.G                 | 5            | HCLS1_HUMAN          |
| P14317                                                                                    | 3             | 3.8406           | R.ADKSAVGFYKGEVEK.H              | 1            | HCLS1_HUMAN          |
| P14317                                                                                    | 2             | 5.0697           | K.SAVGHEYVAEVEK.H                | 5            | HCLS1_HUMAN          |
| P14317                                                                                    | 2             | 2.9191           | R.EHPVPLLR.Q                     | 1            | HCLS1_HUMAN          |
| P14317                                                                                    | 3             | 5.7341           | R.MDKSAVGHEYVAEVEKHSSQTDAAK.G    | 1            | HCLS1_HUMAN          |
| P14317                                                                                    | 2             | 3.8353           | R.NKVSEEDVLR.K                   | 3            | HCLS1_HUMAN          |
| P14317                                                                                    | 2             | 4.1485           | R.QLPEDNEEPPALPPR.T              | 14           | HCLS1_HUMAN          |
| P14317                                                                                    | 2             | 3.3808           | R.TEHINIHQLR.N                   | 1            | HCLS1_HUMAN          |
| P14317                                                                                    | 2             | 4.6876           | K.SAVGFNEMEAPTTAYKK.T            | 8            | HCLS1_HUMAN          |
| P14317                                                                                    | 3             | 4.4352           | R.VDKSAVGFNEM#EAPTTAYKK.T        | 2            | HCLS1_HUMAN          |
| P14317                                                                                    | 2             | 3.4886           | R.EEEEEKAQQVAR.R                 | 5            | HCLS1_HUMAN          |
| P14317                                                                                    | 3             | 4.9575           | R.VDKSAVGFNEMEAPTTAYKK.T         | 4            | HCLS1_HUMAN          |
| P14317                                                                                    | 3             | 4.7127           | R.VDKSAVGFNEM#EAPTTAYK.K         | 1            | HCLS1_HUMAN          |
| P14317                                                                                    | 1             | 3.8566           | K.GFGGQYGIQK.D                   | 12           | HCLS1_HUMAN          |
| P14317                                                                                    | 3             | 5.6171           | R.MDKSAVGHEYVAEVEK.H             | 6            | HCLS1_HUMAN          |
| P14317                                                                                    | 2             | 4.9548           | K.AALGYDYKGETEKHESQR.D           | 3            | HCLS1_HUMAN          |
| P14317                                                                                    | 2             | 3.1187           | K.AKFESM#AEK.R                   | 2            | HCLS1_HUMAN          |
| P14317                                                                                    | 2             | 4.064            | K.AKFESMAEKR.K                   | 2            | HCLS1_HUMAN          |
| P14317                                                                                    | 2             | 3.6711           | K.SAVGFNEMEAPTTAYK.K             | 1            | HCLS1_HUMAN          |
| P14317                                                                                    | 2             | 2.8144           | K.FESMAEKR.K                     | 1            | HCLS1_HUMAN          |
| P14317                                                                                    | 2             | 3.1564           | K.GFGGQYGIQKDR.V                 | 1            | HCLS1_HUMAN          |
| P14317                                                                                    | 2             | 2.7741           | K.ISSEAWPPVGTTPPSESEPV.R.T       | 1            | HCLS1_HUMAN          |
| P14317                                                                                    | 3             | 4.6225           | K.KISSEAWPPVGTTPPSESEPV.R.T      | 5            | HCLS1_HUMAN          |
| P14317                                                                                    | 2             | 3.3473           | K.KTTPIEAASSGAR.G                | 1            | HCLS1_HUMAN          |
| P14317                                                                                    | 3             | 4.3999           | K.REEEEEKAQQVAR.R                | 2            | HCLS1_HUMAN          |
| P14317                                                                                    | 3             | 5.1579           | K.RSPEAPQPVIAM#EPAVPAPLPLK.K     | 4            | HCLS1_HUMAN          |
| P14317                                                                                    | 3             | 5.37             | K.RSPEAPQPVIAMEEPAVPAPLPLK.K     | 2            | HCLS1_HUMAN          |
| P14317                                                                                    | 3             | 5.0768           | K.RSPEAPQPVIAMEEPAVPAPLPLK.I     | 2            | HCLS1_HUMAN          |
| P14317                                                                                    | 2             | 4.6694           | K.SAVGFYKGEVEK.H                 | 5            | HCLS1_HUMAN          |
| P14317                                                                                    | 2             | 3.8095           | K.SAVGFNEM#EAPTTAYKK.T           | 3            | HCLS1_HUMAN          |
| P14317                                                                                    | 2             | 3.0307           | K.FESM#AEK.R                     | 1            | HCLS1_HUMAN          |
| <b><i>Hematopoietic stem/progenitor cell induced protein 2 - Homo sapiens (Human)</i></b> |               |                  |                                  |              |                      |
| Q6PN88                                                                                    | 2             | 3.2799           | R.RTAGAVGKAMGLEVR.A              | 1            | Q6PN88_HUMA          |



| <i>Accession No*</i>                                                                  | <i>Charge</i> | <i>XC(Max)**</i> | <i>Peptide*</i>               | <i>TC***</i> | <i>Reference No*</i> |
|---------------------------------------------------------------------------------------|---------------|------------------|-------------------------------|--------------|----------------------|
| <b><i>Heme oxygenase 1 - Homo sapiens (Human)</i></b>                                 |               |                  |                               |              |                      |
| P09601                                                                                | 2             | 2.8774           | K.VQDSAPVETPR.G               | 2            | HMOX1_HUMAN          |
| <b><i>Heme-binding protein 1 - Homo sapiens (Human)</i></b>                           |               |                  |                               |              |                      |
| Q9NRV9                                                                                | 2             | 3.1806           | K.EADYVAQATR.L                | 1            | HEBP1_HUMAN          |
| Q9NRV9                                                                                | 2             | 2.7907           | K.FATVEVTDKPVDEALR.E          | 1            | HEBP1_HUMAN          |
| <b><i>Heme-binding protein 2 - Homo sapiens (Human)</i></b>                           |               |                  |                               |              |                      |
| Q9Y5Z4                                                                                | 2             | 4.5201           | R.NNEVWLIQKNEPTKENE.-         | 4            | HEBP2_HUMAN          |
| <b><i>Hemoglobin subunit beta - Homo sapiens (Human)</i></b>                          |               |                  |                               |              |                      |
| P68871                                                                                | 2             | 3.0175           | K.EFTPPVQAAYQK.V              | 3            | HBB_HUMAN            |
| <b><i>Hemoglobin subunit delta - Homo sapiens (Human)</i></b>                         |               |                  |                               |              |                      |
| P02042                                                                                | 2             | 4.7245           | R.NFGKEFTPQMQAAYQK.V          | 2            | HBD_HUMAN            |
| P02042                                                                                | 2             | 3.9102           | R.LLGNVLVCVLAR.N              | 2            | HBD_HUMAN            |
| <b><i>Hemopexin precursor - Homo sapiens (Human)</i></b>                              |               |                  |                               |              |                      |
| P02790                                                                                | 3             | 3.9193           | K.GDKVWVYPPEKK.E              | 1            | HEMO_HUMAN           |
| P02790                                                                                | 2             | 3.812            | K.GGYTLVSGYPK.R               | 3            | HEMO_HUMAN           |
| P02790                                                                                | 3             | 4.4558           | K.SGAQATWTELPWPHEK.V          | 1            | HEMO_HUMAN           |
| P02790                                                                                | 3             | 4.4576           | R.WKNFSPVDAAFR.Q              | 6            | HEMO_HUMAN           |
| P02790                                                                                | 2             | 3.5237           | R.YYCFQGNQFLR.F               | 5            | HEMO_HUMAN           |
| <b><i>Hepatitis B virus X-interacting protein - Homo sapiens (Human)</i></b>          |               |                  |                               |              |                      |
| O43504                                                                                | 2             | 4.3327           | K.HDGITVAVHK.M                | 5            | XIP_HUMAN            |
| O43504                                                                                | 3             | 3.7687           | K.LTSDPTDIPVVCLESDNGNIM#IQK.H | 1            | XIP_HUMAN            |
| O43504                                                                                | 2             | 7.3582           | R.GTLSDEHAGVISVLAQQAAL.L      | 5            | XIP_HUMAN            |
| <b><i>Hepatocyte nuclear factor 1-alpha - Homo sapiens (Human)</i></b>                |               |                  |                               |              |                      |
| P20823                                                                                | 3             | 5.203            | K.LSQLQTELLAALLESGLSK.E       | 1            | HNF1A_HUMAN          |
| P20823                                                                                | 2             | 3.3341           | K.AVVETLLQEDPWR.V             | 1            | HNF1A_HUMAN          |
| <b><i>Hepatocyte nuclear factor 1-beta - Homo sapiens (Human)</i></b>                 |               |                  |                               |              |                      |
| P35680                                                                                | 2             | 3.882            | K.ELQALNTEEAQR.A              | 1            | HNF1B_HUMAN          |
| P35680                                                                                | 3             | 4.624            | K.LTSLQQEELSALLSSGVTK.E       | 2            | HNF1B_HUMAN          |
| <b><i>Hepatoma-derived growth factor - Homo sapiens (Human)</i></b>                   |               |                  |                               |              |                      |
| P51858                                                                                | 3             | 3.735            | K.MKGYPHWPARIDEMPEAAVK.S      | 1            | HDGF_HUMAN           |
| P51858                                                                                | 2             | 3.3835           | R.IDEM#PEAAVK.S               | 3            | HDGF_HUMAN           |
| P51858                                                                                | 1             | 3.2505           | R.IDEMPEAAVK.S                | 10           | HDGF_HUMAN           |
| P51858                                                                                | 2             | 3.0677           | R.IDEMPEAAVKSTANK.Y           | 1            | HDGF_HUMAN           |
| <b><i>Hepatoma-derived growth factor-related protein 3 - Homo sapiens (Human)</i></b> |               |                  |                               |              |                      |
| Q9Y3E1                                                                                | 1             | 2.7575           | R.NTTSDLQK.T                  | 4            | HDGR3_HUMAN          |

| <i>Accession No*</i>                                                                | <i>Charge</i> | <i>XC(Max)**</i> | <i>Peptide*</i>                | <i>TC***</i> | <i>Reference No*</i> |
|-------------------------------------------------------------------------------------|---------------|------------------|--------------------------------|--------------|----------------------|
| Q9Y3E1                                                                              | 2             | 3.4213           | K.AGDLVFAK.M                   | 3            | HDGR3_HUMAN          |
| Q9Y3E1                                                                              | 3             | 4.1221           | K.EEENKSSSEGGDAGNDTR.N         | 1            | HDGR3_HUMAN          |
| Q9Y3E1                                                                              | 2             | 5.1909           | K.GFNEGLWEIENNPVK.F            | 12           | HDGR3_HUMAN          |
| Q9Y3E1                                                                              | 3             | 4.8788           | K.RKGFNEGLWEIENNPVK.F          | 2            | HDGR3_HUMAN          |
| Q9Y3E1                                                                              | 3             | 5.2002           | R.KGFNEGLWEIENNPVK.F           | 6            | HDGR3_HUMAN          |
| <b><i>Hepatopoietin protein - Homo sapiens (Human)</i></b>                          |               |                  |                                |              |                      |
| Q9H290                                                                              | 2             | 6.469            | R.DAAASASTPAQAPTS DSPVAEDASR.R | 6            | Q9H290_HUMAN         |
| <b><i>Heterogeneous nuclear ribonucleoprotein A/B - Homo sapiens (Human)</i></b>    |               |                  |                                |              |                      |
| Q99729                                                                              | 1             | 2.3145           | K.DAASVEK.V                    | 4            | ROAA_HUMAN           |
| Q99729                                                                              | 1             | 2.1936           | K.DLKDYFTK.F                   | 1            | ROAA_HUMAN           |
| Q99729                                                                              | 2             | 4.5342           | K.EVYQQQYQYGGGR.G              | 4            | ROAA_HUMAN           |
| Q99729                                                                              | 2             | 3.2569           | K.M#FVGGLSWDTSKK.D             | 2            | ROAA_HUMAN           |
| Q99729                                                                              | 2             | 4.2236           | K.MFVGGLSWDTSK.K               | 5            | ROAA_HUMAN           |
| Q99729                                                                              | 2             | 3.7963           | K.MFVGGLSWDTSKK.D              | 3            | ROAA_HUMAN           |
| Q99729                                                                              | 2             | 3.2043           | K.VLDQKEHR.L                   | 18           | ROAA_HUMAN           |
| Q99729                                                                              | 1             | 3.0177           | R.GFGFILFK.D                   | 5            | ROAA_HUMAN           |
| Q99729                                                                              | 2             | 3.8761           | R.GFVFITFKEEPPVK.V             | 1            | ROAA_HUMAN           |
| <b><i>Heterogeneous nuclear ribonucleoprotein A0 - Homo sapiens (Human)</i></b>     |               |                  |                                |              |                      |
| Q13151                                                                              | 2             | 3.5467           | K.AEIADKQSGK.K                 | 4            | ROA0_HUMAN           |
| Q13151                                                                              | 2             | 5.1732           | K.SGGGGGGSSWGGR.S              | 4            | ROA0_HUMAN           |
| Q13151                                                                              | 3             | 4.3221           | K.RGFGFVYFQNHDAADK.A           | 1            | ROA0_HUMAN           |
| Q13151                                                                              | 3             | 4.3291           | K.KAVPKEDIYSGGGGGSR.S          | 1            | ROA0_HUMAN           |
| Q13151                                                                              | 3             | 4.5521           | K.AVPKEDIYSGGGGGSR.S           | 4            | ROA0_HUMAN           |
| Q13151                                                                              | 2             | 4.0462           | K.GDVAEGDLIEHFSQFGTVEK.A       | 2            | ROA0_HUMAN           |
| <b><i>Heterogeneous nuclear ribonucleoprotein A3 - Homo sapiens (Human)</i></b>     |               |                  |                                |              |                      |
| P51991                                                                              | 2             | 3.9644           | R.GFAFVTFDDHDTVDK.I            | 1            | ROA3_HUMAN           |
| <b><i>Heterogeneous nuclear ribonucleoprotein D0 - Homo sapiens (Human)</i></b>     |               |                  |                                |              |                      |
| Q14103                                                                              | 2             | 5.6964           | K.IDASKNEEDEGHNSNSPR.H         | 5            | HNRPD_HUMAN          |
| Q14103                                                                              | 2             | 4.2535           | R.HSEATAQREEWK.M               | 2            | HNRPD_HUMAN          |
| <b><i>Heterogeneous nuclear ribonucleoprotein D-like - Homo sapiens (Human)</i></b> |               |                  |                                |              |                      |
| O14979                                                                              | 3             | 4.2695           | K.NQQDDGKMFIGGLSWDTSKK.D       | 1            | HNRDL_HUMAN          |
| O14979                                                                              | 3             | 4.0581           | K.NQQDDGKM#FIGGLSWDTSKK.D      | 2            | HNRDL_HUMAN          |
| O14979                                                                              | 2             | 2.9539           | R.QLAPLLPSLAPSSAR.Q            | 1            | HNRDL_HUMAN          |
| O14979                                                                              | 2             | 3.8383           | K.DAASVDKVLLEK.E               | 4            | HNRDL_HUMAN          |
| O14979                                                                              | 2             | 2.9285           | K.KDLTEYLSR.F                  | 2            | HNRDL_HUMAN          |

| <i>Accession No*</i>                                                            | <i>Charge</i> | <i>XC(Max)**</i> | <i>Peptide*</i>                  | <i>TC***</i> | <i>Reference No*</i> |
|---------------------------------------------------------------------------------|---------------|------------------|----------------------------------|--------------|----------------------|
| O14979                                                                          | 2             | 3.1804           | K.DLTEYLSR.F                     | 4            | HNRDL_HUMAN          |
| O14979                                                                          | 3             | 4.5255           | R.FGEVVDCTIKTDPVTGR.S            | 1            | HNRDL_HUMAN          |
| O14979                                                                          | 2             | 4.0234           | K.MFIGGLSWDTSKK.D                | 3            | HNRDL_HUMAN          |
| <b><i>Heterogeneous nuclear ribonucleoprotein F - Homo sapiens (Human)</i></b>  |               |                  |                                  |              |                      |
| P52597                                                                          | 2             | 3.7123           | K.HSGPNSADSANDGFVR.L             | 2            | HNRPF_HUMAN          |
| P52597                                                                          | 3             | 4.4831           | R.M#RPGAYSTGYGGYEEYSGLSDGYGFTTDL | 1            | HNRPF_HUMAN          |
| P52597                                                                          | 3             | 4.9876           | R.MRPGAYSTGYGGYEEYSGLSDGYGFTTDLF | 1            | HNRPF_HUMAN          |
| P52597                                                                          | 2             | 3.7339           | R.QSGEAFVELGSEDDVK.M             | 2            | HNRPF_HUMAN          |
| <b><i>Heterogeneous nuclear ribonucleoprotein H' - Homo sapiens (Human)</i></b> |               |                  |                                  |              |                      |
| P55795                                                                          | 2             | 4.8813           | R.ATENDIYNFFSPLNPMR.V            | 4            | HNRH2_HUMAN          |
| <b><i>Heterogeneous nuclear ribonucleoprotein H3 - Homo sapiens (Human)</i></b> |               |                  |                                  |              |                      |
| P31942                                                                          | 2             | 4.2492           | R.ATGEADVEFVTHEDAVAAMSK.D        | 1            | HNRH3_HUMAN          |
| P31942                                                                          | 2             | 3.0463           | R.VHIDIGADGR.A                   | 1            | HNRH3_HUMAN          |
| P31942                                                                          | 2             | 3.7537           | R.DGM#DNQGGYGSVGR.M              | 7            | HNRH3_HUMAN          |
| P31942                                                                          | 3             | 4.2664           | R.ATGEADVEFVTHEDAVAAM#SK.D       | 2            | HNRH3_HUMAN          |
| P31942                                                                          | 2             | 3.2225           | K.HNGPNDASDGTVR.L                | 2            | HNRH3_HUMAN          |
| P31942                                                                          | 2             | 3.992            | R.DGMDNQGGYGSVGR.M               | 4            | HNRH3_HUMAN          |
| <b><i>Heterogeneous nuclear ribonucleoprotein L - Homo sapiens (Human)</i></b>  |               |                  |                                  |              |                      |
| P14866                                                                          | 1             | 3.1161           | R.YYGGGSEGGR.A                   | 3            | HNRPL_HUMAN          |
| <b><i>Heterogeneous nuclear ribonucleoprotein M - Homo sapiens (Human)</i></b>  |               |                  |                                  |              |                      |
| P52272                                                                          | 2             | 3.6867           | R.MGAGM#GFGLER.M                 | 3            | HNRPM_HUMAN          |
| P52272                                                                          | 2             | 3.8174           | R.AFITNIPFDVK.W                  | 3            | HNRPM_HUMAN          |
| P52272                                                                          | 1             | 2.2704           | R.VGQTIER.M                      | 3            | HNRPM_HUMAN          |
| P52272                                                                          | 2             | 5.3533           | R.MGPLGLDHMASSIER.M              | 3            | HNRPM_HUMAN          |
| P52272                                                                          | 2             | 3.1601           | R.MGPAMGALGAGIER.M               | 1            | HNRPM_HUMAN          |
| P52272                                                                          | 2             | 4.2621           | R.MGPAM#GPALGAGIER.M             | 4            | HNRPM_HUMAN          |
| P52272                                                                          | 2             | 4.282            | R.MGLAMGGGGGASFDR.A              | 3            | HNRPM_HUMAN          |
| P52272                                                                          | 2             | 4.2951           | R.MGLAM#GGGGGASFDR.A             | 2            | HNRPM_HUMAN          |
| P52272                                                                          | 2             | 3.2214           | R.MGANNLER.M                     | 3            | HNRPM_HUMAN          |
| P52272                                                                          | 2             | 4.2258           | R.MGAGMGFGLER.M                  | 3            | HNRPM_HUMAN          |
| P52272                                                                          | 2             | 3.0209           | K.MGGMEGPFGGGMENM#GR.F           | 1            | HNRPM_HUMAN          |
| P52272                                                                          | 2             | 3.6609           | R.M#GLAMGGGGGASFDR.A             | 2            | HNRPM_HUMAN          |
| P52272                                                                          | 2             | 3.6741           | R.M#GLAM#GGGGGASFDR.A            | 2            | HNRPM_HUMAN          |
| P52272                                                                          | 2             | 2.9551           | R.M#GANNLER.M                    | 1            | HNRPM_HUMAN          |
| P52272                                                                          | 2             | 3.4371           | R.M#GAGMGFGLER.M                 | 2            | HNRPM_HUMAN          |

| <i>Accession No*</i>                                                                          | <i>Charge</i> | <i>XC(Max)**</i> | <i>Peptide*</i>                  | <i>TC***</i> | <i>Reference No*</i> |
|-----------------------------------------------------------------------------------------------|---------------|------------------|----------------------------------|--------------|----------------------|
| P52272                                                                                        | 2             | 3.527            | K.GIGMGNIGPAGM#GMEGIGFGINK.M     | 1            | HNRPM_HUMAN          |
| P52272                                                                                        | 3             | 4.0002           | R.GNFGGSFAGSFGGAGGHAPGVAR.K      | 2            | HNRPM_HUMAN          |
| P52272                                                                                        | 2             | 2.7018           | R.INEILSNALK.R                   | 1            | HNRPM_HUMAN          |
| P52272                                                                                        | 2             | 3.2258           | K.MGGMEGPFGGGMENMGR.F            | 2            | HNRPM_HUMAN          |
| P52272                                                                                        | 2             | 3.9944           | R.M#GPAM#GPALGAGIER.M            | 2            | HNRPM_HUMAN          |
| <b><i>Heterogeneous nuclear ribonucleoprotein Q - Homo sapiens (Human)</i></b>                |               |                  |                                  |              |                      |
| O60506                                                                                        | 2             | 4.6959           | R.NLANTVTEEILEK.A                | 4            | HNRPQ_HUMAN          |
| O60506                                                                                        | 2             | 3.1515           | R.DLFEDELVPLFEK.A                | 1            | HNRPQ_HUMAN          |
| O60506                                                                                        | 3             | 5.32             | R.AIEALKEFNEDGALAVLQQFK.D        | 2            | HNRPQ_HUMAN          |
| O60506                                                                                        | 2             | 3.5881           | K.DSDLSHVQNK.S                   | 4            | HNRPQ_HUMAN          |
| O60506                                                                                        | 2             | 3.6758           | K.VADSSKGPDEAK.I                 | 6            | HNRPQ_HUMAN          |
| <b><i>Heterogeneous nuclear ribonucleoprotein U - Homo sapiens (Human)</i></b>                |               |                  |                                  |              |                      |
| Q00839                                                                                        | 2             | 3.7939           | K.VSELKEELKK.R                   | 6            | HNRPU_HUMAN          |
| Q00839                                                                                        | 2             | 2.7192           | R.LSDKGLK.A                      | 1            | HNRPU_HUMAN          |
| Q00839                                                                                        | 3             | 6.6643           | R.LQAALDDEEAGGRPAMEPGNGSLDLGGDSA | 3            | HNRPU_HUMAN          |
| Q00839                                                                                        | 2             | 2.8998           | K.GLKAELMER.L                    | 3            | HNRPU_HUMAN          |
| Q00839                                                                                        | 3             | 5.6538           | R.LQAALDDEEAGGRPAM#EPGNGSLDLGGDS | 2            | HNRPU_HUMAN          |
| Q00839                                                                                        | 2             | 4.4609           | R.LSDKGLKAELMER.L                | 5            | HNRPU_HUMAN          |
| Q00839                                                                                        | 2             | 4.2165           | K.LKVSELKEELK.K                  | 4            | HNRPU_HUMAN          |
| Q00839                                                                                        | 2             | 3.0536           | K.GLKAELM#ER.L                   | 5            | HNRPU_HUMAN          |
| Q00839                                                                                        | 3             | 4.3031           | K.AEGGGGGRRPGAPAGDGKTEQK.G       | 4            | HNRPU_HUMAN          |
| Q00839                                                                                        | 3             | 3.7652           | K.SSGPTSLFAVTVAPPGAR.Q           | 4            | HNRPU_HUMAN          |
| Q00839                                                                                        | 2             | 3.5898           | K.VSELKEELK.K                    | 4            | HNRPU_HUMAN          |
| <b><i>Heterogeneous nuclear ribonucleoprotein U-like protein 1 - Homo sapiens (Human)</i></b> |               |                  |                                  |              |                      |
| Q9BUJ2                                                                                        | 3             | 4.5062           | R.RPLEMEQQQAYRPEMK.T             | 1            | HNRL1_HUMAN          |
| Q9BUJ2                                                                                        | 1             | 2.3362           | R.NPPGASTYNK.N                   | 1            | HNRL1_HUMAN          |
| Q9BUJ2                                                                                        | 3             | 4.4229           | R.QNQFYDTQVIKQENESGYER.R         | 5            | HNRL1_HUMAN          |
| <b><i>Heterogeneous nuclear ribonucleoprotein U-like protein 2 - Homo sapiens (Human)</i></b> |               |                  |                                  |              |                      |
| Q1KMD3                                                                                        | 2             | 3.5487           | K.AAEEQGDDQDSEK.S                | 8            | HNRL2_HUMAN          |
| Q1KMD3                                                                                        | 3             | 4.2486           | R.SGDETPGSEVPGDKAAEEQGDDQDSEK.S  | 1            | HNRL2_HUMAN          |
| Q1KMD3                                                                                        | 2             | 3.1409           | K.REEDEPEER.S                    | 2            | HNRL2_HUMAN          |
| <b><i>Heterogeneous nuclear ribonucleoproteins A2/B1 - Homo sapiens (Human)</i></b>           |               |                  |                                  |              |                      |
| P22626                                                                                        | 2             | 3.3774           | R.GGNFGFGDSR.G                   | 6            | ROA2_HUMAN           |
| P22626                                                                                        | 2             | 3.0654           | R.QEMQEVQSSR.S                   | 2            | ROA2_HUMAN           |
| P22626                                                                                        | 2             | 5.103            | R.NMGPPYGGGNYGPGSGGGGGYGGGR.S    | 6            | ROA2_HUMAN           |

| <i>Accession No*</i>                                                                                    | <i>Charge</i> | <i>XC(Max)**</i> | <i>Peptide*</i>                 | <i>TC***</i> | <i>Reference No*</i> |
|---------------------------------------------------------------------------------------------------------|---------------|------------------|---------------------------------|--------------|----------------------|
| P22626                                                                                                  | 2             | 5.1              | R.NM#GGPYGGGNYGPGGSGGSGGYGGR.S  | 3            | ROA2_HUMAN           |
| P22626                                                                                                  | 3             | 4.6957           | R.GGNFGFGDSRGGGGNFGPGPSNFR.G    | 1            | ROA2_HUMAN           |
| P22626                                                                                                  | 2             | 4.1698           | R.GFGDGYNGYGGGPGGGNFGGSPGYGGGR. | 2            | ROA2_HUMAN           |
| P22626                                                                                                  | 1             | 3.1151           | K.SGNFGGSR.N                    | 12           | ROA2_HUMAN           |
| P22626                                                                                                  | 2             | 4.942            | K.ALSRQEMQEVQSSR.S              | 2            | ROA2_HUMAN           |
| P22626                                                                                                  | 3             | 3.9735           | K.ALSRQEM#QEVQSSR.S             | 1            | ROA2_HUMAN           |
| P22626                                                                                                  | 2             | 3.4781           | R.GGGGNFGPGPSNFR.G              | 12           | ROA2_HUMAN           |
| <b><i>Heterogeneous nuclear ribonucleoproteins C1/C2 - Homo sapiens (Human)</i></b>                     |               |                  |                                 |              |                      |
| P07910                                                                                                  | 2             | 2.888            | K.QAVEMKNDKSEEEQSSSSVK.K        | 1            | HNRPC_HUMAN          |
| P07910                                                                                                  | 2             | 2.8729           | K.SEEEQSSSSVK.K                 | 3            | HNRPC_HUMAN          |
| P07910                                                                                                  | 3             | 4.0097           | K.QAVEM#KNDKSEEEQSSSSVK.K       | 2            | HNRPC_HUMAN          |
| P07910                                                                                                  | 3             | 4.8388           | K.NDKSEEEQSSSSVKK.D             | 3            | HNRPC_HUMAN          |
| P07910                                                                                                  | 2             | 4.3373           | K.NDKSEEEQSSSSVK.K              | 6            | HNRPC_HUMAN          |
| P07910                                                                                                  | 2             | 4.3302           | K.GFAFVQYVNER.N                 | 4            | HNRPC_HUMAN          |
| P07910                                                                                                  | 3             | 4.5601           | R.MIAGQVLDINLAAEPK.V            | 2            | HNRPC_HUMAN          |
| <b><i>Hexamethylene bis-acetamide-inducible protein 1. - Homo sapiens (Human)</i></b>                   |               |                  |                                 |              |                      |
| O94992                                                                                                  | 2             | 5.141            | K.LGAPAAGGEEEWGQQQR.Q           | 5            | O94992_HUMAN         |
| O94992                                                                                                  | 2             | 4.0934           | K.QELIKEYLELEK.C                | 2            | O94992_HUMAN         |
| O94992                                                                                                  | 2             | 4.9218           | R.AENLQLLTENELHR.Q              | 2            | O94992_HUMAN         |
| O94992                                                                                                  | 3             | 5.4037           | R.LRAENLQLLTENELHR.Q            | 1            | O94992_HUMAN         |
| O94992                                                                                                  | 2             | 3.3893           | R.YHTESLQNMSK.Q                 | 2            | O94992_HUMAN         |
| <b><i>Hexamethylene bis-acetamide-inducible protein 2. - Homo sapiens (Human)</i></b>                   |               |                  |                                 |              |                      |
| Q96MH2                                                                                                  | 2             | 3.6375           | R.QVEELAAEVQR.L                 | 2            | Q96MH2_HUMA          |
| <b><i>High mobility group nucleosome-binding domain-containing protein 3 - Homo sapiens (Human)</i></b> |               |                  |                                 |              |                      |
| Q15651                                                                                                  | 2             | 3.3545           | K.EGTAPSENGETKAEAAQK.T          | 2            | HMG3_HUMAN           |
| Q15651                                                                                                  | 1             | 2.4883           | K.TESVDNEGE.-                   | 4            | HMG3_HUMAN           |
| Q15651                                                                                                  | 2             | 4.2498           | K.AEEAQKTESVDNEGE.-             | 3            | HMG3_HUMAN           |
| Q15651                                                                                                  | 3             | 4.7866           | K.QEAGKEGTAPSENGETKAEAAQK.T     | 1            | HMG3_HUMAN           |
| Q15651                                                                                                  | 3             | 4.7563           | K.EGTAPSENGETKAEAAQKTESVDNEGE.- | 5            | HMG3_HUMAN           |
| <b><i>High mobility group nucleosome-binding domain-containing protein 4 - Homo sapiens (Human)</i></b> |               |                  |                                 |              |                      |
| O00479                                                                                                  | 1             | 2.1664           | K.KGEKLPK.G                     | 1            | HMG4_HUMAN           |
| O00479                                                                                                  | 2             | 4.0167           | K.NRDASTLQSQK.A                 | 11           | HMG4_HUMAN           |
| O00479                                                                                                  | 3             | 5.4865           | K.NRDASTLQSQKAEGTGDAK.-         | 11           | HMG4_HUMAN           |
| O00479                                                                                                  | 2             | 3.2199           | R.DASTLQSQK.A                   | 7            | HMG4_HUMAN           |
| O00479                                                                                                  | 3             | 5.1593           | R.DASTLQSQKAEGTGDAK.-           | 20           | HMG4_HUMAN           |

| <i>Accession No*</i>                                                         | <i>Charge</i> | <i>XC(Max)**</i> | <i>Peptide*</i>                | <i>TC***</i> | <i>Reference No*</i> |
|------------------------------------------------------------------------------|---------------|------------------|--------------------------------|--------------|----------------------|
| O00479                                                                       | 3             | 4.5441           | R.LSAKPAPPKPEPR.P              | 6            | HMGN4_HUMAN          |
| <b><i>High mobility group protein 20A - Homo sapiens (Human)</i></b>         |               |                  |                                |              |                      |
| Q9NP66                                                                       | 3             | 4.3406           | R.LHSIILANPQDNENFIATVR.E       | 1            | HM20A_HUMAN          |
| <b><i>High mobility group protein B1 - Homo sapiens (Human)</i></b>          |               |                  |                                |              |                      |
| P09429                                                                       | 3             | 6.1545           | K.KKEEEDEEEDDEEEEEDEEEDDEEEDDD | 1            | HMGB1_HUMAN          |
| <b><i>High mobility group protein B2 - Homo sapiens (Human)</i></b>          |               |                  |                                |              |                      |
| P26583                                                                       | 2             | 3.3999           | K.KHPDSSVNFAEFSK.K             | 2            | HMGB2_HUMAN          |
| P26583                                                                       | 2             | 3.7976           | K.SEHPGLSIGDTAK.K              | 5            | HMGB2_HUMAN          |
| P26583                                                                       | 3             | 4.9085           | K.LGEMWSEQSAKDKQPYEQK.A        | 5            | HMGB2_HUMAN          |
| P26583                                                                       | 2             | 3.7766           | K.LGEMWSEQSAKDK.Q              | 2            | HMGB2_HUMAN          |
| P26583                                                                       | 1             | 3.3277           | K.LGEMWSEQSAK.D                | 8            | HMGB2_HUMAN          |
| P26583                                                                       | 2             | 3.9594           | K.LGEM#WSEQSAK.D               | 6            | HMGB2_HUMAN          |
| P26583                                                                       | 2             | 4.8687           | K.KLGEMWSEQSAK.D               | 8            | HMGB2_HUMAN          |
| P26583                                                                       | 2             | 3.8205           | K.KLGEMWSEQSAKDK.Q             | 1            | HMGB2_HUMAN          |
| P26583                                                                       | 1             | 2.7301           | K.SKFEFMAK.S                   | 6            | HMGB2_HUMAN          |
| P26583                                                                       | 3             | 4.2351           | K.SEHPGLSIGDTAKK.L             | 8            | HMGB2_HUMAN          |
| P26583                                                                       | 2             | 3.993            | K.KHPDSSVNFAEFSKK.C            | 2            | HMGB2_HUMAN          |
| P26583                                                                       | 3             | 4.0179           | K.IKSEHPGLSIGDTAKK.L           | 3            | HMGB2_HUMAN          |
| P26583                                                                       | 2             | 4.2758           | K.IKSEHPGLSIGDTAK.K            | 4            | HMGB2_HUMAN          |
| P26583                                                                       | 3             | 5.1437           | K.HPDSSVNFAEFSKK.C             | 1            | HMGB2_HUMAN          |
| P26583                                                                       | 3             | 3.8929           | K.HPDSSVNFAEFSK.K              | 2            | HMGB2_HUMAN          |
| P26583                                                                       | 2             | 3.2526           | K.EKSKFEFMAK.S                 | 1            | HMGB2_HUMAN          |
| P26583                                                                       | 2             | 3.006            | K.DKQPYEQK.A                   | 4            | HMGB2_HUMAN          |
| P26583                                                                       | 3             | 4.6458           | K.KLGEM#WSEQSAK.D              | 9            | HMGB2_HUMAN          |
| P26583                                                                       | 3             | 3.8366           | K.KLGEM#WSEQSAKDK.Q            | 2            | HMGB2_HUMAN          |
| <b><i>High mobility group protein B3 - Homo sapiens (Human)</i></b>          |               |                  |                                |              |                      |
| O15347                                                                       | 3             | 4.5297           | K.KLGEM#WNNLNDSEKQPYITK.A      | 1            | HMGB3_HUMAN          |
| O15347                                                                       | 3             | 6.7895           | K.KLGEMWNNLNDSEKQPYITK.A       | 2            | HMGB3_HUMAN          |
| O15347                                                                       | 3             | 4.2536           | K.LGEMWNNLNDSEKQPYITK.A        | 2            | HMGB3_HUMAN          |
| <b><i>High mobility group protein HMG-I/HMG-Y - Homo sapiens (Human)</i></b> |               |                  |                                |              |                      |
| P17096                                                                       | 2             | 4.2517           | R.KQPPVSPGTALVGSQK.E           | 3            | HMGA1_HUMAN          |
| P17096                                                                       | 2             | 4.0696           | R.KQPPVSPGTALVGSQKEPSEVPTPK.R  | 1            | HMGA1_HUMAN          |
| <b><i>HIRA-interacting protein 3 - Homo sapiens (Human)</i></b>              |               |                  |                                |              |                      |
| Q9BW71                                                                       | 2             | 3.6243           | R.EESEESEAEPVQR.T              | 2            | HIRP3_HUMAN          |
| Q9BW71                                                                       | 3             | 4.6718           | R.GRPDLSTLTHSIVR.R             | 2            | HIRP3_HUMAN          |

| <i>Accession No*</i>                                                              | <i>Charge</i> | <i>XC(Max)**</i> | <i>Peptide*</i>                 | <i>TC***</i> | <i>Reference No*</i> |
|-----------------------------------------------------------------------------------|---------------|------------------|---------------------------------|--------------|----------------------|
| Q9BW71                                                                            | 2             | 2.9226           | R.SHLEPEEK.Q                    | 2            | HIRP3_HUMAN          |
| <b><i>Histidine triad nucleotide-binding protein 1 - Homo sapiens (Human)</i></b> |               |                  |                                 |              |                      |
| P49773                                                                            | 4             | 4.9923           | K.KHISQISVAEDDDDESLGHLMIVGK.K   | 1            | HINT1_HUMAN          |
| P49773                                                                            | 3             | 4.367            | R.MVVNEGSDGGQSVYHVHLHVLGGR.Q    | 2            | HINT1_HUMAN          |
| P49773                                                                            | 2             | 3.2063           | R.PGGDTIFGK.I                   | 4            | HINT1_HUMAN          |
| P49773                                                                            | 3             | 3.854            | K.KHISQISVAEDDDDESLGHLMIVGKK.C  | 1            | HINT1_HUMAN          |
| P49773                                                                            | 4             | 5.9841           | K.IIFEDDRCLAFHDISPQAPTHFLVIPK.K | 2            | HINT1_HUMAN          |
| P49773                                                                            | 2             | 2.7947           | K.IIFEDDR.C                     | 1            | HINT1_HUMAN          |
| P49773                                                                            | 2             | 3.9409           | K.AQVARPGGDTIFGK.I              | 4            | HINT1_HUMAN          |
| P49773                                                                            | 3             | 6.3475           | K.HISQISVAEDDDDESLGHLMIVGK.K    | 1            | HINT1_HUMAN          |
| <b><i>Histidine triad nucleotide-binding protein 2 - Homo sapiens (Human)</i></b> |               |                  |                                 |              |                      |
| Q9BX68                                                                            | 2             | 4.998            | K.AQQATPGGAAPTIFSR.I            | 8            | HINT2_HUMAN          |
| Q9BX68                                                                            | 2             | 2.8081           | R.DVAPQAPVHFLVIPK.K             | 1            | HINT2_HUMAN          |
| Q9BX68                                                                            | 2             | 5.3737           | R.ISQAEEDQQLLGHLLLVAK.Q         | 2            | HINT2_HUMAN          |
| <b><i>Histidine-rich glycoprotein precursor - Homo sapiens (Human)</i></b>        |               |                  |                                 |              |                      |
| P04196                                                                            | 2             | 2.9319           | R.KYWNDCEPPDSR.R                | 1            | HRG_HUMAN            |
| P04196                                                                            | 3             | 4.9195           | R.VRGEGTGYFVDFSVR.N             | 8            | HRG_HUMAN            |
| P04196                                                                            | 2             | 2.9596           | R.SSTTKPPFKPHGSR.D              | 5            | HRG_HUMAN            |
| P04196                                                                            | 2             | 2.9799           | K.DSPVLIDFFEDTERYR.K            | 2            | HRG_HUMAN            |
| P04196                                                                            | 3             | 4.2623           | R.RRDGYLFQLLR.I                 | 2            | HRG_HUMAN            |
| P04196                                                                            | 2             | 3.7802           | R.RPSEIVIGQCK.V                 | 3            | HRG_HUMAN            |
| P04196                                                                            | 2             | 4.0623           | R.RDGYLFQLLR.I                  | 5            | HRG_HUMAN            |
| P04196                                                                            | 2             | 4.404            | R.GGEGTGYFVDFSVR.N              | 7            | HRG_HUMAN            |
| P04196                                                                            | 2             | 3.8237           | R.DGYLFQLLR.I                   | 16           | HRG_HUMAN            |
| P04196                                                                            | 2             | 2.8955           | K.YWNDCEPPDSR.R                 | 1            | HRG_HUMAN            |
| P04196                                                                            | 2             | 4.5637           | K.YKEENDDFASFR.V                | 9            | HRG_HUMAN            |
| P04196                                                                            | 3             | 4.3924           | K.HPLKPDNQFPQSVSESCPGK.F        | 1            | HRG_HUMAN            |
| P04196                                                                            | 2             | 2.9686           | K.SGFPQVSMFFTHTFPK.-            | 1            | HRG_HUMAN            |
| P04196                                                                            | 3             | 5.9357           | R.KGEVLPLPEANFPSFPLPHHK.H       | 4            | HRG_HUMAN            |
| <b><i>Histocompatibility - Homo sapiens (Human)</i></b>                           |               |                  |                                 |              |                      |
| Q6P189                                                                            | 2             | 4.993            | R.KDGADAVFPGPSLEPPAGSSGVK.A     | 2            | Q6P189_HUMAN         |
| Q6P189                                                                            | 2             | 3.3091           | R.AGSPSPQPSGELPR.K              | 3            | Q6P189_HUMAN         |
| <b><i>Histone deacetylase 4 - Homo sapiens (Human)</i></b>                        |               |                  |                                 |              |                      |
| P56524                                                                            | 2             | 3.0964           | K.GKESAVASTEVK.M                | 1            | HDAC4_HUMAN          |
| <b><i>Histone H1.0 - Homo sapiens (Human)</i></b>                                 |               |                  |                                 |              |                      |

| <i>Accession No*</i>                              | <i>Charge</i> | <i>XC(Max)**</i> | <i>Peptide*</i>         | <i>TC***</i> | <i>Reference No*</i> |
|---------------------------------------------------|---------------|------------------|-------------------------|--------------|----------------------|
| P07305                                            | 2             | 2.7886           | K.RLVTTGVLK.Q           | 1            | H10_HUMAN            |
| P07305                                            | 3             | 4.4333           | K.STDHPKYSDMIVAAIQAEK.N | 2            | H10_HUMAN            |
| P07305                                            | 2             | 3.6993           | K.VGENADSQIK.L          | 15           | H10_HUMAN            |
| P07305                                            | 2             | 4.0046           | K.YSDM#IVAAIQAEK.N      | 5            | H10_HUMAN            |
| P07305                                            | 2             | 4.6736           | K.YSDMIVAAIQAEK.N       | 6            | H10_HUMAN            |
| P07305                                            | 1             | 2.624            | R.LVTTGVLK.Q            | 4            | H10_HUMAN            |
| P07305                                            | 1             | 3.0983           | K.GVGASGSFR.L           | 3            | H10_HUMAN            |
| <b><i>Histone H1.1 - Homo sapiens (Human)</i></b> |               |                  |                         |              |                      |
| Q02539                                            | 3             | 4.358            | K.KKPAGPSVSELIVQAASSK.E | 1            | H11_HUMAN            |
| Q02539                                            | 2             | 2.8564           | K.ASSVETKPGASK.V        | 1            | H11_HUMAN            |
| Q02539                                            | 2             | 2.7199           | K.KASSVETKPGASK.V       | 1            | H11_HUMAN            |
| <b><i>Histone H1.2 - Homo sapiens (Human)</i></b> |               |                  |                         |              |                      |
| P16403                                            | 3             | 4.3798           | K.AKKPAAATVTK.K         | 6            | H12_HUMAN            |
| P16403                                            | 2             | 2.8358           | K.KPAAATVTK.K           | 3            | H12_HUMAN            |
| <b><i>Histone H1.3 - Homo sapiens (Human)</i></b> |               |                  |                         |              |                      |
| P16402                                            | 2             | 2.9862           | K.KVAGAATPK.K           | 3            | H13_HUMAN            |
| P16402                                            | 2             | 2.7137           | K.VAGAATPK.K            | 2            | H13_HUMAN            |
| <b><i>Histone H1.5 - Homo sapiens (Human)</i></b> |               |                  |                         |              |                      |
| P16401                                            | 2             | 3.3075           | K.ATGPPVSELITK.A        | 2            | H15_HUMAN            |
| P16401                                            | 2             | 3.3592           | R.NGLSLAALK.K           | 2            | H15_HUMAN            |
| P16401                                            | 3             | 4.595            | R.KATGPPVSELITK.A       | 9            | H15_HUMAN            |
| P16401                                            | 3             | 4.2722           | K.RKATGPPVSELITK.A      | 6            | H15_HUMAN            |
| P16401                                            | 2             | 4.62             | K.KALAAGGYDVEK.N        | 6            | H15_HUMAN            |
| P16401                                            | 1             | 3.6408           | K.ALAAGGYDVEK.N         | 11           | H15_HUMAN            |
| P16401                                            | 3             | 4.7594           | K.KALAAGGYDVEKNNSR.I    | 3            | H15_HUMAN            |
| <b><i>Histone H1x - Homo sapiens (Human)</i></b>  |               |                  |                         |              |                      |
| Q92522                                            | 2             | 4.8653           | K.YSQLVETIR.R           | 7            | H1X_HUMAN            |
| Q92522                                            | 2             | 3.6653           | R.RGAPAAATAPAPTAHK.A    | 2            | H1X_HUMAN            |
| Q92522                                            | 2             | 3.9342           | R.GAPAAATAPAPTAHK.A     | 1            | H1X_HUMAN            |
| Q92522                                            | 2             | 2.7465           | K.KVPWFDQQNGR.T         | 1            | H1X_HUMAN            |
| Q92522                                            | 2             | 3.0492           | K.YSQLVETIRR.L          | 2            | H1X_HUMAN            |
| Q92522                                            | 1             | 2.1758           | K.GTGANGSFK.L           | 1            | H1X_HUMAN            |
| Q92522                                            | 2             | 4.7029           | K.ALVQNDTLLQVK.G        | 9            | H1X_HUMAN            |
| Q92522                                            | 2             | 3.9303           | K.AGGSAAALSPSK.R        | 6            | H1X_HUMAN            |
| Q92522                                            | 1             | 4.2305           | K.AGGSAAALSPSK.K        | 7            | H1X_HUMAN            |



| <i>Accession No*</i>                                                                               | <i>Charge</i> | <i>XC(Max)**</i> | <i>Peptide*</i>                 | <i>TC***</i> | <i>Reference No*</i> |
|----------------------------------------------------------------------------------------------------|---------------|------------------|---------------------------------|--------------|----------------------|
| Q92522                                                                                             | 2             | 2.8832           | K.KAAKPSVPK.V                   | 1            | H1X_HUMAN            |
| <b><i>Histone H2A - Homo sapiens (Human)</i></b>                                                   |               |                  |                                 |              |                      |
| Q92646                                                                                             | 2             | 3.1733           | K.ILELAGNAAR.D                  | 1            | Q92646_HUMAN         |
| <b><i>Histone H2A.x - Homo sapiens (Human)</i></b>                                                 |               |                  |                                 |              |                      |
| P16104                                                                                             | 1             | 2.9796           | K.ATQASQEY.-                    | 4            | H2AX_HUMAN           |
| P16104                                                                                             | 1             | 3.1673           | K.KATQASQEY.-                   | 4            | H2AX_HUMAN           |
| <b><i>Histone H4 - Homo sapiens (Human)</i></b>                                                    |               |                  |                                 |              |                      |
| P62805                                                                                             | 2             | 3.1484           | K.RISGLIYEETR.G                 | 2            | H4_HUMAN             |
| P62805                                                                                             | 3             | 5.371            | R.KVTAMDVVYALKR.Q               | 2            | H4_HUMAN             |
| P62805                                                                                             | 2             | 4.1873           | R.ISGLIYEETR.G                  | 8            | H4_HUMAN             |
| P62805                                                                                             | 2             | 3.7515           | R.DNIQGITKPAIR.R                | 4            | H4_HUMAN             |
| P62805                                                                                             | 2             | 3.6568           | R.DAVTYTEHAK.R                  | 8            | H4_HUMAN             |
| P62805                                                                                             | 3             | 5.0156           | K.VFLENVIRDAVTYTEHAK.R          | 6            | H4_HUMAN             |
| P62805                                                                                             | 2             | 3.3882           | K.VFLENVIR.D                    | 2            | H4_HUMAN             |
| P62805                                                                                             | 2             | 4.1951           | K.TVTAMDVVYALKR.R               | 3            | H4_HUMAN             |
| P62805                                                                                             | 2             | 3.799            | K.TVTAMDVVYALKR.Q               | 3            | H4_HUMAN             |
| <b><i>Histone RNA hairpin-binding protein - Homo sapiens (Human)</i></b>                           |               |                  |                                 |              |                      |
| Q14493                                                                                             | 3             | 4.8813           | R.RPESFTTPEGPKPR.S              | 2            | SLBP_HUMAN           |
| <b><i>Histone-binding protein RBBP4 - Homo sapiens (Human)</i></b>                                 |               |                  |                                 |              |                      |
| Q09028                                                                                             | 3             | 4.7123           | K.IGEEQSPEDAEDGPPELLFIHGGHTAK.I | 1            | RBBP4_HUMAN          |
| <b><i>Histone-lysine N-methyltransferase NSD3 - Homo sapiens (Human)</i></b>                       |               |                  |                                 |              |                      |
| Q9BZ95                                                                                             | 3             | 4.9397           | R.NEKPTQSVSSPEATSGSTGSVEK.K     | 1            | NSD3_HUMAN           |
| <b><i>Histone-lysine N-methyltransferase, H3 lysine-4 specific SET7 - Homo sapiens (Human)</i></b> |               |                  |                                 |              |                      |
| Q8WTS6                                                                                             | 2             | 2.9451           | K.IAYVYPDER.T                   | 3            | SETD7_HUMAN          |
| Q8WTS6                                                                                             | 4             | 5.1364           | K.LATLMSTEEGRPHFELMPGNSVYHFDK.S | 2            | SETD7_HUMAN          |
| Q8WTS6                                                                                             | 2             | 4.3163           | K.VAVGPNTVMSFYNGVR.I            | 3            | SETD7_HUMAN          |
| <b><i>HIV Tat-specific factor 1 - Homo sapiens (Human)</i></b>                                     |               |                  |                                 |              |                      |
| O43719                                                                                             | 2             | 4.7033           | R.LRGWEAFLNAPEANR.G             | 2            | HTSF1_HUMAN          |
| O43719                                                                                             | 2             | 3.4785           | R.RSDSVSASER.A                  | 3            | HTSF1_HUMAN          |
| O43719                                                                                             | 2             | 3.6178           | R.HFSEHPSTSK.M                  | 3            | HTSF1_HUMAN          |
| O43719                                                                                             | 2             | 3.138            | R.GWEAFLNAPEANR.G               | 1            | HTSF1_HUMAN          |
| O43719                                                                                             | 2             | 4.4182           | K.TEDGGEFEEGASENNAK.E           | 2            | HTSF1_HUMAN          |
| O43719                                                                                             | 2             | 3.8849           | K.MNAQETATGMAFEEPIDEK.K         | 2            | HTSF1_HUMAN          |
| O43719                                                                                             | 2             | 3.6553           | K.M#NAQETATGMAFEEPIDEK.K        | 1            | HTSF1_HUMAN          |
| <b><i>HLA class II DR-beta - Homo sapiens (Human)</i></b>                                          |               |                  |                                 |              |                      |

| <i>Accession No*</i>                                             | <i>Charge</i> | <i>XC(Max)**</i> | <i>Peptide*</i>               | <i>TC***</i> | <i>Reference No*</i> |
|------------------------------------------------------------------|---------------|------------------|-------------------------------|--------------|----------------------|
| Q29890                                                           | 2             | 3.1039           | R.RVYPEVTVYPAK.T              | 2            | Q29890_HUMAN         |
| <b><i>HMGAI protein - Homo sapiens (Human)</i></b>               |               |                  |                               |              |                      |
| Q6IPL9                                                           | 2             | 2.909            | R.KQPPKEPSEVPTPK.R            | 1            | Q6IPL9_HUMAN         |
| <b><i>Homeobox protein cut-like 1 - Homo sapiens (Human)</i></b> |               |                  |                               |              |                      |
| P39880                                                           | 2             | 2.9909           | K.TAEPAQPSSASGSGNSDDAIR.S     | 2            | CUTL1_HUMAN          |
| <b><i>Homeobox protein Hox-A5 - Homo sapiens (Human)</i></b>     |               |                  |                               |              |                      |
| P20719                                                           | 2             | 3.0343           | R.SYAASASAAPAEPR.Y            | 1            | HXA5_HUMAN           |
| <b><i>Homeodomain-only protein - Homo sapiens (Human)</i></b>    |               |                  |                               |              |                      |
| Q9BPY8                                                           | 2             | 2.9589           | R.RSEGLPSECR.S                | 1            | HOP_HUMAN            |
| <b><i>Hook homolog 2 - Homo sapiens (Human)</i></b>              |               |                  |                               |              |                      |
| Q96ED9                                                           | 2             | 3.3341           | R.LNQQQLSEL.R.A               | 1            | HOOK2_HUMAN          |
| <b><i>Hook homolog 3 - Homo sapiens (Human)</i></b>              |               |                  |                               |              |                      |
| Q86VS8                                                           | 3             | 3.764            | K.LNQEGLSDNEKIALQLSLLDDANLR.K | 1            | HOOK3_HUMAN          |
| Q86VS8                                                           | 2             | 3.5516           | R.LASTGSGQSFLAR.Q             | 2            | HOOK3_HUMAN          |
| <b><i>Hornerin - Homo sapiens (Human)</i></b>                    |               |                  |                               |              |                      |
| Q86YZ3                                                           | 3             | 5.8334           | R.GEQHGSSSSGSSSSYGQHGSGSR.Q   | 1            | HORN_HUMAN           |
| Q86YZ3                                                           | 2             | 4.0504           | R.YGQQGSGSGQSPSR.G            | 2            | HORN_HUMAN           |
| Q86YZ3                                                           | 3             | 3.9524           | R.QGSSAGSSSSYGQHGSGSR.Q       | 2            | HORN_HUMAN           |
| <b><i>Host cell factor - Homo sapiens (Human)</i></b>            |               |                  |                               |              |                      |
| P51610                                                           | 2             | 2.7832           | K.GAPGQPGTILR.T               | 1            | HCFC1_HUMAN          |
| P51610                                                           | 2             | 4.6486           | K.IATGHGQQGVTQVVLK.G          | 3            | HCFC1_HUMAN          |
| P51610                                                           | 2             | 3.5418           | K.SPISVPGGSALISNLGK.V         | 3            | HCFC1_HUMAN          |
| P51610                                                           | 2             | 3.4078           | K.VASSPVM#VSNPATR.M           | 1            | HCFC1_HUMAN          |
| P51610                                                           | 2             | 3.7238           | K.VASSPVMVSNPATR.M            | 2            | HCFC1_HUMAN          |
| P51610                                                           | 2             | 2.7484           | K.VM#TSGTGAPAK.I              | 1            | HCFC1_HUMAN          |
| P51610                                                           | 2             | 3.7644           | R.SPAFVQLAPLSSK.V             | 2            | HCFC1_HUMAN          |
| <b><i>Hsp90 co-chaperone Cdc37 - Homo sapiens (Human)</i></b>    |               |                  |                               |              |                      |
| Q16543                                                           | 3             | 4.1482           | K.ASEAKEGEEAGPGDPLLEAVPK.T    | 1            | CDC37_HUMAN          |
| Q16543                                                           | 2             | 3.4314           | R.SWEQKLEEMR.K                | 1            | CDC37_HUMAN          |
| Q16543                                                           | 2             | 3.1892           | R.LQAEAQQLR.K                 | 3            | CDC37_HUMAN          |
| Q16543                                                           | 3             | 3.8914           | K.LKELEVAEGGKAELER.L          | 1            | CDC37_HUMAN          |
| Q16543                                                           | 2             | 2.9384           | K.TGDEKDVSV.-                 | 1            | CDC37_HUMAN          |
| <b><i>HSPA5 protein - Homo sapiens (Human)</i></b>               |               |                  |                               |              |                      |
| Q2KHP4                                                           | 2             | 4.7509           | K.VTHAVVTVPAYFNDAQR.Q         | 4            | Q2KHP4_HUMA          |
| Q2KHP4                                                           | 3             | 3.7427           | K.SQIFSTASDNQPTVTIK.V         | 2            | Q2KHP4_HUMA          |

| <i>Accession No*</i>                               | <i>Charge</i> | <i>XC(Max)**</i> | <i>Peptide*</i>             | <i>TC***</i> | <i>Reference No*</i> |
|----------------------------------------------------|---------------|------------------|-----------------------------|--------------|----------------------|
| Q2KHP4                                             | 2             | 4.051            | K.TFAPEEISAM#VLTK.M         | 4            | Q2KHP4_HUMA          |
| Q2KHP4                                             | 2             | 2.7528           | R.NELESYAYSLK.N             | 1            | Q2KHP4_HUMA          |
| Q2KHP4                                             | 2             | 4.6874           | K.TKPYIQVDIGGGQTK.T         | 7            | Q2KHP4_HUMA          |
| Q2KHP4                                             | 2             | 3.6236           | K.SDIDEIVLVGGSTR.I          | 3            | Q2KHP4_HUMA          |
| Q2KHP4                                             | 3             | 5.8041           | K.VLESDLKKSDIDEIVLVGGSTR.I  | 4            | Q2KHP4_HUMA          |
| Q2KHP4                                             | 2             | 3.2637           | K.VYEGERPLTK.D              | 3            | Q2KHP4_HUMA          |
| Q2KHP4                                             | 2             | 3.6287           | R.AKFEELNM#DLFR.S           | 1            | Q2KHP4_HUMA          |
| Q2KHP4                                             | 3             | 5.2128           | R.AKFEELNMDLFR.S            | 7            | Q2KHP4_HUMA          |
| Q2KHP4                                             | 3             | 4.1768           | R.IDTRNELESYAYSLK.N         | 7            | Q2KHP4_HUMA          |
| Q2KHP4                                             | 2             | 3.8384           | R.IINEPTAAAIAYGLDKR.E       | 4            | Q2KHP4_HUMA          |
| Q2KHP4                                             | 2             | 3.2242           | K.RALSSQHQAR.I              | 5            | Q2KHP4_HUMA          |
| Q2KHP4                                             | 2             | 4.6956           | R.MVNDAEKFAEEDKK.L          | 3            | Q2KHP4_HUMA          |
| Q2KHP4                                             | 3             | 5.0467           | K.TFAPEEISAMVLTK.M          | 10           | Q2KHP4_HUMA          |
| Q2KHP4                                             | 2             | 3.7612           | R.TWNDPSVQQDIK.F            | 5            | Q2KHP4_HUMA          |
| Q2KHP4                                             | 2             | 4.4978           | R.ITPSYVAFTPEGER.L          | 4            | Q2KHP4_HUMA          |
| Q2KHP4                                             | 2             | 4.8481           | K.KSDIDEIVLVGGSTR.I         | 2            | Q2KHP4_HUMA          |
| Q2KHP4                                             | 2             | 2.8796           | K.VLESDLKK.S                | 1            | Q2KHP4_HUMA          |
| Q2KHP4                                             | 3             | 5.5892           | K.AVEEKIEWLESHQDADIEDFKAK.K | 2            | Q2KHP4_HUMA          |
| Q2KHP4                                             | 3             | 4.5944           | K.DAGTIAGLNVNMR.I           | 7            | Q2KHP4_HUMA          |
| Q2KHP4                                             | 2             | 4.6581           | K.DAGTIAGLNVMR.I            | 3            | Q2KHP4_HUMA          |
| Q2KHP4                                             | 2             | 2.752            | K.EFFNGKEPSR.G              | 1            | Q2KHP4_HUMA          |
| Q2KHP4                                             | 2             | 3.847            | K.FEELNMDLFR.S              | 3            | Q2KHP4_HUMA          |
| Q2KHP4                                             | 3             | 4.8924           | K.IEWLESHQDADIEDFKAK.K      | 1            | Q2KHP4_HUMA          |
| Q2KHP4                                             | 2             | 3.9989           | K.NQLTSNPENTVFDAGR.L        | 3            | Q2KHP4_HUMA          |
| Q2KHP4                                             | 2             | 5.4213           | K.KKELEEIVQPIISK.L          | 5            | Q2KHP4_HUMA          |
| Q2KHP4                                             | 2             | 4.5095           | K.KSQIFSTASDNQPTVTIK.V      | 2            | Q2KHP4_HUMA          |
| Q2KHP4                                             | 3             | 4.3519           | K.KTKPYIQVDIGGGQTK.T        | 1            | Q2KHP4_HUMA          |
| Q2KHP4                                             | 2             | 4.1022           | K.KVTHAVVTPAYFNDAQR.Q       | 3            | Q2KHP4_HUMA          |
| Q2KHP4                                             | 2             | 3.9091           | K.MKETAEAYLGK.K             | 2            | Q2KHP4_HUMA          |
| Q2KHP4                                             | 3             | 4.5696           | K.MKETAEAYLGKK.V            | 3            | Q2KHP4_HUMA          |
| Q2KHP4                                             | 3             | 5.0312           | K.NGRVEIANDQGNR.I           | 5            | Q2KHP4_HUMA          |
| Q2KHP4                                             | 2             | 3.0497           | K.NKITITNDQNR.L             | 1            | Q2KHP4_HUMA          |
| Q2KHP4                                             | 2             | 4.5825           | K.NQLTSNPENTVFDAGR.R        | 1            | Q2KHP4_HUMA          |
| Q2KHP4                                             | 2             | 3.0065           | K.ITITNDQNR.L               | 4            | Q2KHP4_HUMA          |
| <b><i>HSRBC protein - Homo sapiens (Human)</i></b> |               |                  |                             |              |                      |
| Q969G5                                             | 2             | 3.0662           | R.RQGGLAGSVR.R              | 2            | Q969G5_HUMA          |

| <i>Accession No*</i>                                                          | <i>Charge</i> | <i>XC(Max)**</i> | <i>Peptide*</i>                    | <i>TC***</i> | <i>Reference No*</i> |
|-------------------------------------------------------------------------------|---------------|------------------|------------------------------------|--------------|----------------------|
| Q969G5                                                                        | 2             | 4.9742           | R.SHDTTSNTLAQLLAK.A                | 2            | Q969G5_HUMA          |
| Q969G5                                                                        | 3             | 4.942            | R.GKLHVLLFKEEGEVPASAFQK.A          | 1            | Q969G5_HUMA          |
| Q969G5                                                                        | 2             | 4.3877           | R.KGPAAPPPTPVKPPR.L                | 5            | Q969G5_HUMA          |
| <b><i>Huntingtin-interacting protein HYPK - Homo sapiens (Human)</i></b>      |               |                  |                                    |              |                      |
| Q9NX55                                                                        | 3             | 4.1985           | K.VTIKKEDLELIMTEMEISR.A            | 2            | HYPK_HUMAN           |
| Q9NX55                                                                        | 2             | 4.0533           | R.EHMGNVVEALIALTN.-                | 4            | HYPK_HUMAN           |
| Q9NX55                                                                        | 2             | 4.5114           | R.KHDSGAADLER.V                    | 6            | HYPK_HUMAN           |
| Q9NX55                                                                        | 3             | 5.3623           | R.VTDYAEKEIQSSNLETAMSVIGDRR.S      | 1            | HYPK_HUMAN           |
| <b><i>Hypothetical gene supported by AK027125 - Homo sapiens (Human)</i></b>  |               |                  |                                    |              |                      |
| A4D104                                                                        | 3             | 4.7658           | K.TSDIEANQPLETNKENSSTVSDPEMENK.A   | 2            | A4D104_HUMAN         |
| <b><i>Hypothetical LOC284297 - Homo sapiens (Human)</i></b>                   |               |                  |                                    |              |                      |
| A1L4H1                                                                        | 2             | 4.2092           | R.QALLLGLTQLVEAAR.G                | 2            | A1L4H1_HUMAN         |
| <b><i>Hypothetical LOC51149 - Homo sapiens (Human)</i></b>                    |               |                  |                                    |              |                      |
| Q6NTE8                                                                        | 2             | 5.1583           | K.LNLLQGQVSELPLR.S                 | 4            | Q6NTE8_HUMA          |
| <b><i>Hypoxia up-regulated protein 1 precursor - Homo sapiens (Human)</i></b> |               |                  |                                    |              |                      |
| Q9Y4L1                                                                        | 2             | 2.7874           | K.AVGKEELGK.N                      | 1            | HYOU1_HUMAN          |
| Q9Y4L1                                                                        | 2             | 3.4714           | K.NINADEAAAMGAVYQAAALSK.A          | 1            | HYOU1_HUMAN          |
| Q9Y4L1                                                                        | 2             | 4.2723           | K.AEAGPEGVAPAPEGEKK.Q              | 2            | HYOU1_HUMAN          |
| Q9Y4L1                                                                        | 2             | 3.147            | R.LIPEMDQIFTEVEM#TTLEK.V           | 1            | HYOU1_HUMAN          |
| <b><i>ICOS ligand precursor - Homo sapiens (Human)</i></b>                    |               |                  |                                    |              |                      |
| O75144                                                                        | 2             | 3.1463           | R.GLYDVVSVLR.I                     | 2            | ICOSL_HUMAN          |
| <b><i>Ig kappa chain V-I region Mev - Homo sapiens (Human)</i></b>            |               |                  |                                    |              |                      |
| P01612                                                                        | 2             | 4.1958           | -.DVQM#TQSPSSLSASVGDR.V            | 2            | KV120_HUMAN          |
| <b><i>Ig kappa chain V-I region Wes - Homo sapiens (Human)</i></b>            |               |                  |                                    |              |                      |
| P01611                                                                        | 2             | 4.0595           | -.DIQM#TQSPSSVSASVGDR.V            | 2            | KV119_HUMAN          |
| P01611                                                                        | 2             | 3.381            | -.DIQMTQSPSSVSASVGDR.V             | 1            | KV119_HUMAN          |
| <b><i>Ig lambda chain V-III region SH - Homo sapiens (Human)</i></b>          |               |                  |                                    |              |                      |
| P01714                                                                        | 2             | 4.6204           | -.SELTQDPAVSVALGQTVR.I             | 2            | LV301_HUMAN          |
| <b><i>IGKC protein - Homo sapiens (Human)</i></b>                             |               |                  |                                    |              |                      |
| Q569I9                                                                        | 2             | 3.1982           | R.GTVAAPSVFIFPPSDEQLK.S            | 2            | Q569I9_HUMAN         |
| <b><i>Immunoglobulin J chain - Homo sapiens (Human)</i></b>                   |               |                  |                                    |              |                      |
| P01591                                                                        | 3             | 4.5046           | K.KCDPTEVELDNQIVTATQSNICDEDSATETCY | 2            | IGJ_HUMAN            |
| P01591                                                                        | 2             | 3.5857           | R.FVYHLSDLCK.K                     | 5            | IGJ_HUMAN            |
| P01591                                                                        | 2             | 3.011            | R.SSEDPNEDIVER.N                   | 2            | IGJ_HUMAN            |
| <b><i>Immunoglobulin-binding protein 1 - Homo sapiens (Human)</i></b>         |               |                  |                                    |              |                      |

| <i>Accession No*</i>                                                                                      | <i>Charge</i> | <i>XC(Max)**</i> | <i>Peptide*</i>               | <i>TC***</i> | <i>Reference No*</i> |
|-----------------------------------------------------------------------------------------------------------|---------------|------------------|-------------------------------|--------------|----------------------|
| P78318                                                                                                    | 3             | 5.9641           | K.AAQQQEEQEEKEEEDDEQTLHR.A    | 2            | IGBP1_HUMAN          |
| P78318                                                                                                    | 2             | 3.2193           | K.YGALPDQGIK.A                | 1            | IGBP1_HUMAN          |
| <b><i>Import inner membrane translocase subunit TIM44, mitochondrial precursor - Homo sapiens (Hu</i></b> |               |                  |                               |              |                      |
| O43615                                                                                                    | 3             | 4.1951           | R.KGFLSGLLDNVKQELAK.N         | 1            | TIM44_HUMAN          |
| <b><i>Inactive phospholipase C-like protein 2 - Homo sapiens (Human)</i></b>                              |               |                  |                               |              |                      |
| Q9UPR0                                                                                                    | 1             | 2.204            | K.PGGLPR.R                    | 1            | PLCL2_HUMAN          |
| Q9UPR0                                                                                                    | 2             | 4.1347           | R.GGAAGGALPTSPGPALGAK.G       | 1            | PLCL2_HUMAN          |
| <b><i>InaD-like protein - Homo sapiens (Human)</i></b>                                                    |               |                  |                               |              |                      |
| Q8NI35                                                                                                    | 2             | 2.9452           | R.KTSSSTSPLEPPSDR.G           | 1            | INADL_HUMAN          |
| <b><i>Inner nuclear membrane protein Man1 - Homo sapiens (Human)</i></b>                                  |               |                  |                               |              |                      |
| Q9Y2U8                                                                                                    | 2             | 3.592            | R.ISASGPESLLGGPGGASAAPAAGSK.V | 1            | MAN1_HUMAN           |
| Q9Y2U8                                                                                                    | 2             | 3.7098           | K.KLREEEQQHR.S                | 2            | MAN1_HUMAN           |
| Q9Y2U8                                                                                                    | 3             | 3.9581           | K.LREEEQQHR.S                 | 4            | MAN1_HUMAN           |
| Q9Y2U8                                                                                                    | 2             | 2.9188           | K.VLLGFSSDESDEASPR.D          | 1            | MAN1_HUMAN           |
| Q9Y2U8                                                                                                    | 2             | 4.6065           | R.ENYSDSEEEEDDDVASSR.Q        | 4            | MAN1_HUMAN           |
| <b><i>Inositol polyphosphate phosphatase-like protein 1 - Homo sapiens (Human)</i></b>                    |               |                  |                               |              |                      |
| O15357                                                                                                    | 2             | 4.7101           | K.TLSEVDYAPAGPAR.S            | 4            | O15357_HUMAN         |
| O15357                                                                                                    | 2             | 3.2923           | R.SALLPGPLELQPPR.G            | 1            | O15357_HUMAN         |
| <b><i>Inositol-trisphosphate 3-kinase B - Homo sapiens (Human)</i></b>                                    |               |                  |                               |              |                      |
| P27987                                                                                                    | 2             | 3.9741           | K.SGGPGPSGSETPPPPR.R          | 2            | IP3KB_HUMAN          |
| P27987                                                                                                    | 2             | 3.1585           | R.GASFLFPPAESLSPEEPR.S        | 1            | IP3KB_HUMAN          |
| <b><i>Insulin-like growth factor-binding protein 4 precursor - Homo sapiens (Human)</i></b>               |               |                  |                               |              |                      |
| P22692                                                                                                    | 3             | 4.0047           | K.TGVKLPGGLEPK.G              | 1            | IBP4_HUMAN           |
| <b><i>Insulin-like growth factor-binding protein 5 precursor - Homo sapiens (Human)</i></b>               |               |                  |                               |              |                      |
| P24593                                                                                                    | 2             | 2.9024           | R.HM#EASLQELK.A               | 1            | IBP5_HUMAN           |
| P24593                                                                                                    | 2             | 2.8258           | R.HMEASLQELK.A                | 2            | IBP5_HUMAN           |
| <b><i>Insulin-like growth factor-binding protein 7 precursor - Homo sapiens (Human)</i></b>               |               |                  |                               |              |                      |
| Q16270                                                                                                    | 2             | 4.1361           | K.ITVVDALHEIPVK.K             | 2            | IBP7_HUMAN           |
| Q16270                                                                                                    | 2             | 3.8821           | R.TELLPGDRDNLAIQTR.G          | 4            | IBP7_HUMAN           |
| Q16270                                                                                                    | 3             | 4.7447           | R.GGPEKHEVTGWVLSPLSK.E        | 2            | IBP7_HUMAN           |
| Q16270                                                                                                    | 2             | 3.8595           | R.GEGEPCGGGGAGR.G             | 13           | IBP7_HUMAN           |
| Q16270                                                                                                    | 3             | 4.2232           | K.EDAGEYECHASNSQGQASASAK.I    | 3            | IBP7_HUMAN           |
| Q16270                                                                                                    | 2             | 4.848            | K.AGAAAGPGVSGVCVCK.S          | 2            | IBP7_HUMAN           |
| Q16270                                                                                                    | 3             | 3.985            | K.ITVVDALHEIPVKKGEAEL.-       | 1            | IBP7_HUMAN           |
| <b><i>Integrator complex subunit 12 - Homo sapiens (Human)</i></b>                                        |               |                  |                               |              |                      |

| <i>Accession No*</i>                                                                                              | <i>Charge</i> | <i>XC(Max)**</i> | <i>Peptide*</i>                   | <i>TC***</i> | <i>Reference No*</i> |
|-------------------------------------------------------------------------------------------------------------------|---------------|------------------|-----------------------------------|--------------|----------------------|
| Q96CB8                                                                                                            | 3             | 3.8189           | K.TTSESSSSPSASLKGPTSQESQLNAMK.R   | 1            | INT12_HUMAN          |
| <b><i>Integrin alpha-1 precursor - Homo sapiens (Human)</i></b>                                                   |               |                  |                                   |              |                      |
| P56199                                                                                                            | 2             | 3.3858           | K.VIQDCEDENIQR.F                  | 2            | ITA1_HUMAN           |
| <b><i>Integrin alpha-5 precursor - Homo sapiens (Human)</i></b>                                                   |               |                  |                                   |              |                      |
| P08648                                                                                                            | 2             | 4.4779           | R.LLESSLSSSEGEPEVEYK.S            | 2            | ITA5_HUMAN           |
| <b><i>Integrin alpha-7 precursor [Contains: Integrin alpha-7 heavy chain; Integrin alpha-7 light chain] -</i></b> |               |                  |                                   |              |                      |
| Q13683                                                                                                            | 4             | 4.784            | R.REGPDAHPILAADGHPELPGDPGHPGTA.-  | 1            | ITA7_HUMAN           |
| <b><i>Integrin alpha-V precursor - Homo sapiens (Human)</i></b>                                                   |               |                  |                                   |              |                      |
| P06756                                                                                                            | 2             | 3.8383           | R.STGLNAVPSQILEGQWAAR.S           | 1            | ITAV_HUMAN           |
| <b><i>Integrin beta-4 precursor - Homo sapiens (Human)</i></b>                                                    |               |                  |                                   |              |                      |
| P16144                                                                                                            | 2             | 3.7564           | R.LVFSALGPTSLR.V                  | 3            | ITB4_HUMAN           |
| <b><i>Integrin, beta 1 - Homo sapiens (Human)</i></b>                                                             |               |                  |                                   |              |                      |
| Q8WUM6                                                                                                            | 3             | 4.27             | K.LKPEDITQIQPQQLVLR.L             | 4            | Q8WUM6_HUMA          |
| <b><i>Inter-alpha-trypsin inhibitor heavy chain H1 precursor - Homo sapiens (Human)</i></b>                       |               |                  |                                   |              |                      |
| P19827                                                                                                            | 2             | 3.6707           | K.ILGDM#QPGDYFDLVLFGR.V           | 1            | ITIH1_HUMAN          |
| P19827                                                                                                            | 2             | 3.0038           | R.EVAFDLEIPK.T                    | 2            | ITIH1_HUMAN          |
| P19827                                                                                                            | 3             | 4.2941           | R.FAHYVVTSQVVNTANEAR.E            | 2            | ITIH1_HUMAN          |
| P19827                                                                                                            | 2             | 4.1997           | K.GSLVQASEANLQAAQDFVR.G           | 2            | ITIH1_HUMAN          |
| <b><i>Intercellular adhesion molecule 1 precursor - Homo sapiens (Human)</i></b>                                  |               |                  |                                   |              |                      |
| P05362                                                                                                            | 2             | 3.1367           | K.LLGIETPLPK.K                    | 2            | ICAM1_HUMAN          |
| P05362                                                                                                            | 2             | 2.7674           | K.LLGIETPLPK.E                    | 1            | ICAM1_HUMAN          |
| P05362                                                                                                            | 2             | 4.1933           | K.REPAVGEPAEVTTTLVLR.R            | 1            | ICAM1_HUMAN          |
| P05362                                                                                                            | 2             | 3.5743           | K.VTLNGVPAQPLGPR.A                | 2            | ICAM1_HUMAN          |
| <b><i>Intercellular adhesion molecule 2 precursor - Homo sapiens (Human)</i></b>                                  |               |                  |                                   |              |                      |
| P13598                                                                                                            | 2             | 4.0347           | R.QVILTLPQTLVAVGK.S               | 3            | ICAM2_HUMAN          |
| <b><i>Interferon regulatory factor 2-binding protein 1 - Homo sapiens (Human)</i></b>                             |               |                  |                                   |              |                      |
| Q53EL7                                                                                                            | 2             | 2.8724           | K.DPGGGGGPVR.A                    | 2            | Q53EL7_HUMAN         |
| <b><i>Interferon-induced protein with tetratricopeptide repeats 3 - Homo sapiens (Human)</i></b>                  |               |                  |                                   |              |                      |
| O14879                                                                                                            | 4             | 4.7253           | K.STDKKEIKDQPQNVSENLLPQNAPNYWYLQG | 1            | IFIT3_HUMAN          |
| <b><i>Interleukin enhancer-binding factor 3 - Homo sapiens (Human)</i></b>                                        |               |                  |                                   |              |                      |
| Q12906                                                                                                            | 3             | 5.2568           | K.AYAALAALEKLPDTPALDANKK.K        | 1            | ILF3_HUMAN           |
| Q12906                                                                                                            | 1             | 2.5145           | K.FNYSGSGGR.S                     | 2            | ILF3_HUMAN           |
| Q12906                                                                                                            | 2             | 3.8569           | K.VLQDM#GLPTGAEGR.D               | 1            | ILF3_HUMAN           |
| Q12906                                                                                                            | 2             | 4.3427           | K.VLQDMGLPTGAEGR.D                | 1            | ILF3_HUMAN           |
| Q12906                                                                                                            | 2             | 3.3074           | R.LNQLKPLQYK.L                    | 1            | ILF3_HUMAN           |

| <i>Accession No*</i>                                                                                 | <i>Charge</i> | <i>XC(Max)**</i> | <i>Peptide*</i>           | <i>TC***</i> | <i>Reference No*</i> |
|------------------------------------------------------------------------------------------------------|---------------|------------------|---------------------------|--------------|----------------------|
| <b><i>Intracellular hyaluronan-binding protein 4 - Homo sapiens (Human)</i></b>                      |               |                  |                           |              |                      |
| Q5JVS0                                                                                               | 2             | 3.1647           | R.RAENYGPR.A              | 2            | HABP4_HUMAN          |
| Q5JVS0                                                                                               | 4             | 4.8139           | K.YRDDMVKDDYEDDSHVFR.K    | 1            | HABP4_HUMAN          |
| Q5JVS0                                                                                               | 3             | 4.231            | R.FHQLLDDSDPFDILR.E       | 3            | HABP4_HUMAN          |
| Q5JVS0                                                                                               | 2             | 2.9116           | R.KPESTVPSK.A             | 4            | HABP4_HUMAN          |
| <b><i>Iron-responsive element-binding protein 2 - Homo sapiens (Human)</i></b>                       |               |                  |                           |              |                      |
| P48200                                                                                               | 2             | 2.7941           | R.RGNDAVMTRGTFANIK.L      | 1            | IREB2_HUMAN          |
| <b><i>Iron-sulfur cluster assembly 2 homolog, mitochondrial precursor - Homo sapiens (Human)</i></b> |               |                  |                           |              |                      |
| Q86U28                                                                                               | 2             | 3.7685           | R.LQVEGGGCSGFQYK.F        | 2            | ISCA2_HUMAN          |
| Q86U28                                                                                               | 2             | 3.8929           | R.VVVDSDSLAFVK.G          | 2            | ISCA2_HUMAN          |
| Q86U28                                                                                               | 2             | 4.0593           | R.LLEITEGSEFLR.L          | 2            | ISCA2_HUMAN          |
| <b><i>Isocitrate dehydrogenase [NADP] cytoplasmic - Homo sapiens (Human)</i></b>                     |               |                  |                           |              |                      |
| O75874                                                                                               | 2             | 2.8422           | R.DATNDQVTK.D             | 1            | IDHC_HUMAN           |
| <b><i>IWS1 homolog - Homo sapiens (Human)</i></b>                                                    |               |                  |                           |              |                      |
| Q96ST2                                                                                               | 2             | 3.1928           | R.DLEQMPQR.R              | 1            | IWS1_HUMAN           |
| Q96ST2                                                                                               | 2             | 3.4505           | R.RMNSTGGQTPR.R           | 2            | IWS1_HUMAN           |
| Q96ST2                                                                                               | 2             | 3.649            | R.PIFGLTSNYK.G            | 1            | IWS1_HUMAN           |
| Q96ST2                                                                                               | 3             | 4.99             | R.NRDGGTFISDADDVVSAMIVK.M | 1            | IWS1_HUMAN           |
| Q96ST2                                                                                               | 2             | 3.1925           | K.MNEAAEEDR.Q             | 2            | IWS1_HUMAN           |
| Q96ST2                                                                                               | 2             | 2.8825           | R.MNSTGGQTPR.R            | 2            | IWS1_HUMAN           |
| Q96ST2                                                                                               | 2             | 2.7228           | R.VSDSESEGPQK.G           | 1            | IWS1_HUMAN           |
| Q96ST2                                                                                               | 2             | 3.3151           | R.DGGTFISDADDVVSAMIVK.M   | 1            | IWS1_HUMAN           |
| Q96ST2                                                                                               | 2             | 4.4915           | K.MNEAAEEDRQLNNQK.K       | 1            | IWS1_HUMAN           |
| Q96ST2                                                                                               | 3             | 4.5297           | K.LINEWSRPIFGLTSNYK.G     | 2            | IWS1_HUMAN           |
| Q96ST2                                                                                               | 3             | 4.8431           | K.KLTLLPAVVMHLK.K         | 1            | IWS1_HUMAN           |
| Q96ST2                                                                                               | 2             | 3.0614           | K.GPASDSETEDASR.H         | 1            | IWS1_HUMAN           |
| Q96ST2                                                                                               | 2             | 3.4514           | K.WNVEMESSR.F             | 2            | IWS1_HUMAN           |
| Q96ST2                                                                                               | 2             | 3.0712           | R.DLEQM#PQR.R             | 2            | IWS1_HUMAN           |
| <b><i>JmjC domain-containing histone demethylation protein 2B - Homo sapiens (Human)</i></b>         |               |                  |                           |              |                      |
| Q7LBC6                                                                                               | 2             | 3.3638           | K.GGNASGEPGLDQR.A         | 2            | JHD2B_HUMAN          |
| <b><i>JmjC domain-containing protein 3 - Homo sapiens (Human)</i></b>                                |               |                  |                           |              |                      |
| O15054                                                                                               | 2             | 3.1735           | R.SATDPADPVDTAEPADSGTER.L | 1            | JMJD3_HUMAN          |
| <b><i>JUB protein - Homo sapiens (Human)</i></b>                                                     |               |                  |                           |              |                      |
| Q96IF1                                                                                               | 2             | 3.3118           | R.YEGSFPAGPPPTR.A         | 1            | Q96IF1_HUMAN         |
| Q96IF1                                                                                               | 2             | 2.8986           | R.SGSDGTPGPGK.G           | 4            | Q96IF1_HUMAN         |

| <i>Accession No*</i>                                                                   | <i>Charge</i> | <i>XC(Max)**</i> | <i>Peptide*</i>                  | <i>TC***</i> | <i>Reference No*</i> |
|----------------------------------------------------------------------------------------|---------------|------------------|----------------------------------|--------------|----------------------|
| <b><i>Junctophilin-2 - Homo sapiens (Human)</i></b>                                    |               |                  |                                  |              |                      |
| Q9BR39                                                                                 | 2             | 3.8617           | K.DGLLSPGAWNGEPSGEGSR.S          | 1            | JPH2_HUMAN           |
| <b><i>Kelch repeat and BTB domain-containing protein 11 - Homo sapiens (Human)</i></b> |               |                  |                                  |              |                      |
| O94819                                                                                 | 2             | 3.7933           | R.QWEAGSAGAASPEELASPEER.A        | 1            | KBTBB_HUMAN          |
| <b><i>Keratin, type I cytoskeletal 10 - Homo sapiens (Human)</i></b>                   |               |                  |                                  |              |                      |
| P13645                                                                                 | 2             | 5.0648           | R.GSSGGGCGFGSSGGYGGGLGGFGGGSFR.G | 4            | K1C10_HUMAN          |
| P13645                                                                                 | 2             | 3.5373           | R.SLLEGEESGGGGGR.G               | 1            | K1C10_HUMAN          |
| P13645                                                                                 | 2             | 3.7306           | R.SQYEQLAEQNRK.D                 | 2            | K1C10_HUMAN          |
| P13645                                                                                 | 3             | 3.7505           | R.NVSTGDVNVEM#NAAPGVDLTQLLNMR.S  | 1            | K1C10_HUMAN          |
| P13645                                                                                 | 3             | 4.8778           | K.TIDDLKNQILNLTDDNANILLQIDNAR.L  | 1            | K1C10_HUMAN          |
| P13645                                                                                 | 2             | 5.7683           | K.GSLGGGFSSGGFSGGSFSR.G          | 7            | K1C10_HUMAN          |
| P13645                                                                                 | 3             | 4.6518           | K.SKELTTEIDNIEQISSYK.S           | 1            | K1C10_HUMAN          |
| P13645                                                                                 | 2             | 3.8871           | R.ALEESNYELEGGK.I                | 3            | K1C10_HUMAN          |
| <b><i>Keratin, type I cytoskeletal 14 - Homo sapiens (Human)</i></b>                   |               |                  |                                  |              |                      |
| P02533                                                                                 | 2             | 4.6076           | R.APSTYGGGLSVSSSR.F              | 1            | K1C14_HUMAN          |
| <b><i>Keratin, type I cytoskeletal 16 - Homo sapiens (Human)</i></b>                   |               |                  |                                  |              |                      |
| P08779                                                                                 | 2             | 3.9504           | R.APSTYGGGLSVSSSR.F              | 2            | K1C16_HUMAN          |
| <b><i>Keratin, type I cytoskeletal 18 - Homo sapiens (Human)</i></b>                   |               |                  |                                  |              |                      |
| P05783                                                                                 | 2             | 4.0322           | R.IVDGKVVSETNDTK.V               | 1            | K1C18_HUMAN          |
| P05783                                                                                 | 3             | 5.6324           | R.SLGSVQAPSYGARPVSSAASVYAGAGGSGS | 19           | K1C18_HUMAN          |
| P05783                                                                                 | 2             | 4.0018           | R.SLGSVQAPSYGAR.P                | 11           | K1C18_HUMAN          |
| P05783                                                                                 | 3             | 4.6501           | R.RLLEDGEDFNLDALDSSNSMQTIQK.T    | 1            | K1C18_HUMAN          |
| P05783                                                                                 | 1             | 2.1603           | R.LASYLDR.V                      | 1            | K1C18_HUMAN          |
| P05783                                                                                 | 3             | 4.5797           | R.YALQMEQLNGILLHLESELAQTR.A      | 1            | K1C18_HUMAN          |
| P05783                                                                                 | 3             | 4.2668           | R.GMGSGGLATGIAGGLAGMGGIQNEKETMQ  | 1            | K1C18_HUMAN          |
| P05783                                                                                 | 2             | 4.5772           | R.AQIFANTVDNAR.I                 | 1            | K1C18_HUMAN          |
| P05783                                                                                 | 1             | 2.909            | K.VVSETNDTK.V                    | 10           | K1C18_HUMAN          |
| P05783                                                                                 | 2             | 6.6003           | R.PVSSAASVYAGAGGSGSR.I           | 28           | K1C18_HUMAN          |
| <b><i>Keratin, type I cytoskeletal 19 - Homo sapiens (Human)</i></b>                   |               |                  |                                  |              |                      |
| P08727                                                                                 | 3             | 4.0874           | R.FGAQLAHIQALISGIEAQLGDVR.A      | 1            | K1C19_HUMAN          |
| P08727                                                                                 | 2             | 4.0456           | R.SLLEGQEDHYNLSASK.V             | 1            | K1C19_HUMAN          |
| P08727                                                                                 | 2             | 4.2492           | R.QSSATSSFGGLGGGSRV.F            | 2            | K1C19_HUMAN          |
| P08727                                                                                 | 2             | 3.3462           | R.GQVGGQVSVEVDSAPGTDLAK.I        | 1            | K1C19_HUMAN          |
| P08727                                                                                 | 2             | 4.2628           | K.SRLEQEIATYR.S                  | 2            | K1C19_HUMAN          |
| P08727                                                                                 | 2             | 2.7963           | K.NHEEEISTLR.G                   | 1            | K1C19_HUMAN          |



| <i>Accession No*</i>                                                 | <i>Charge</i> | <i>XC(Max)**</i> | <i>Peptide*</i>                | <i>TC***</i> | <i>Reference No*</i> |
|----------------------------------------------------------------------|---------------|------------------|--------------------------------|--------------|----------------------|
| P08727                                                               | 2             | 4.1544           | K.AALEDTLAETEAR.F              | 1            | K1C19_HUMAN          |
| P08727                                                               | 2             | 2.9087           | K.DAEAWFTSR.T                  | 2            | K1C19_HUMAN          |
| <b><i>Keratin, type I cytoskeletal 9 - Homo sapiens (Human)</i></b>  |               |                  |                                |              |                      |
| P35527                                                               | 2             | 5.3968           | R.GSGSGSYGGGGSGGGYGGGSGSR.G    | 2            | K1C9_HUMAN           |
| P35527                                                               | 2             | 2.7546           | K.KGPAAIQK.N                   | 1            | K1C9_HUMAN           |
| P35527                                                               | 2             | 5.328            | R.SGGGGGGGLGSGGSIR.S           | 6            | K1C9_HUMAN           |
| P35527                                                               | 2             | 3.2146           | R.QGVADADINGLR.Q               | 2            | K1C9_HUMAN           |
| P35527                                                               | 3             | 5.2681           | R.LASYLDKVQALEEANNLENK.I       | 2            | K1C9_HUMAN           |
| P35527                                                               | 3             | 3.9508           | R.IKFEMEQLNR.Q                 | 2            | K1C9_HUMAN           |
| P35527                                                               | 3             | 6.6454           | R.HGVQELEIELQSQLSK.A           | 2            | K1C9_HUMAN           |
| P35527                                                               | 3             | 4.093            | R.HGVQELEIELQSQLSK.K           | 1            | K1C9_HUMAN           |
| P35527                                                               | 3             | 6.315            | K.EIETYHNLLEGGQEDFESSGAGK.I    | 1            | K1C9_HUMAN           |
| P35527                                                               | 2             | 4.8374           | R.GGGGSGFYSGGGSGGGFSASSLGGGFGG | 2            | K1C9_HUMAN           |
| P35527                                                               | 2             | 4.3039           | R.FSSSSGYGGGSSR.V              | 4            | K1C9_HUMAN           |
| P35527                                                               | 2             | 3.0632           | K.TLLDIDNTR.M                  | 3            | K1C9_HUMAN           |
| P35527                                                               | 1             | 3.3394           | K.STMQELNSR.L                  | 6            | K1C9_HUMAN           |
| P35527                                                               | 3             | 4.6152           | K.NYSPYNTIDDLKDQIVDLTVGNNK.T   | 1            | K1C9_HUMAN           |
| P35527                                                               | 3             | 7.5795           | R.GSGSGSHGGGSGFGGESGGSYGGGEEAS | 1            | K1C9_HUMAN           |
| P35527                                                               | 2             | 3.2784           | K.STM#QELNSR.L                 | 5            | K1C9_HUMAN           |
| <b><i>Keratin, type II cytoskeletal 1 - Homo sapiens (Human)</i></b> |               |                  |                                |              |                      |
| P04264                                                               | 3             | 5.1743           | R.GSYGSGSSYSGGGGSGGGGGGGHGS    | 1            | K2C1_HUMAN           |
| P04264                                                               | 2             | 3.8736           | R.LLRDYQELMNTK.L               | 3            | K2C1_HUMAN           |
| P04264                                                               | 3             | 3.7338           | R.LRSEIDNVKK.Q                 | 1            | K2C1_HUMAN           |
| P04264                                                               | 2             | 4.4706           | R.SGGGFSSGSAGIINYQR.R          | 2            | K2C1_HUMAN           |
| P04264                                                               | 2             | 5.0739           | R.SLDLDSIIAEVK.A               | 4            | K2C1_HUMAN           |
| P04264                                                               | 1             | 2.8828           | R.SLVNLGGSK.S                  | 5            | K2C1_HUMAN           |
| P04264                                                               | 2             | 3.983            | R.TNAENEFVTIKK.D               | 3            | K2C1_HUMAN           |
| P04264                                                               | 2             | 2.8933           | R.TLLEGEESR.M                  | 1            | K2C1_HUMAN           |
| P04264                                                               | 2             | 4.086            | R.TNAENEFVTIK.K                | 3            | K2C1_HUMAN           |
| P04264                                                               | 2             | 2.9417           | K.DVDGAYMTK.V                  | 3            | K2C1_HUMAN           |
| P04264                                                               | 3             | 5.2217           | R.GSGGGGGGSSGGRGSGGGSSGGSIGGR. | 2            | K2C1_HUMAN           |
| P04264                                                               | 3             | 4.1591           | R.THNLPEPYFESFINNLR.R          | 3            | K2C1_HUMAN           |
| P04264                                                               | 2             | 4.6423           | R.FSSCGGGGSGFAGGGFGSR.S        | 3            | K2C1_HUMAN           |
| P04264                                                               | 3             | 5.4235           | R.FLEQQNQVLQTKWELLQQVDTSTR.T   | 3            | K2C1_HUMAN           |
| P04264                                                               | 2             | 3.8803           | K.YEELQITAGR.H                 | 3            | K2C1_HUMAN           |
| P04264                                                               | 2             | 4.1552           | K.SLNNQFASFIDKVR.F             | 3            | K2C1_HUMAN           |

| <i>Accession No*</i>                                                           | <i>Charge</i> | <i>XC(Max)**</i> | <i>Peptide*</i>                  | <i>TC***</i> | <i>Reference No*</i> |
|--------------------------------------------------------------------------------|---------------|------------------|----------------------------------|--------------|----------------------|
| P04264                                                                         | 2             | 4.547            | K.SLNNQFASFIDK.V                 | 5            | K2C1_HUMAN           |
| P04264                                                                         | 2             | 4.8502           | K.SKAEAESLYQSK.Y                 | 2            | K2C1_HUMAN           |
| P04264                                                                         | 3             | 3.893            | K.LNDLEDALQQAKEDLAR.L            | 1            | K2C1_HUMAN           |
| P04264                                                                         | 2             | 2.8476           | K.DVDGAYM#TK.V                   | 4            | K2C1_HUMAN           |
| P04264                                                                         | 2             | 2.9705           | K.AEAESLYQSK.Y                   | 2            | K2C1_HUMAN           |
| P04264                                                                         | 3             | 4.2476           | K.NKLNDLEDALQQAKEDLAR.L          | 1            | K2C1_HUMAN           |
| P04264                                                                         | 2             | 5.0812           | R.GGGGGGYGSGGSSYSGGGSYGSGGGG     | 5            | K2C1_HUMAN           |
| <b><i>Keratin, type II cytoskeletal 2 epidermal - Homo sapiens (Human)</i></b> |               |                  |                                  |              |                      |
| P35908                                                                         | 2             | 3.9665           | R.GSSSSGGYSSGSSSYGSGGR.Q         | 1            | K22E_HUMAN           |
| P35908                                                                         | 2             | 4.8142           | R.HGGGGGGFGGGGFGSR.S             | 1            | K22E_HUMAN           |
| P35908                                                                         | 2             | 5.3581           | R.GGSSSSGGYSGGGGSSSVK.G          | 2            | K22E_HUMAN           |
| P35908                                                                         | 2             | 4.0381           | R.GFSSGSVVSGGSR.R                | 2            | K22E_HUMAN           |
| P35908                                                                         | 2             | 3.7802           | K.VDLLNQEIEFLK.V                 | 3            | K22E_HUMAN           |
| P35908                                                                         | 2             | 5.1291           | K.GGSISGGYGSGGGK.H               | 4            | K22E_HUMAN           |
| P35908                                                                         | 2             | 5.6525           | R.GGSGGGGSISGGYGSGGGSGGR.Y       | 2            | K22E_HUMAN           |
| P35908                                                                         | 3             | 4.2524           | R.NKLNDLEALQQAKEDLAR.L           | 1            | K22E_HUMAN           |
| <b><i>Keratin, type II cytoskeletal 5 - Homo sapiens (Human)</i></b>           |               |                  |                                  |              |                      |
| P13647                                                                         | 2             | 3.1823           | K.AQYEEIANR.S                    | 1            | K2C5_HUMAN           |
| P13647                                                                         | 2             | 2.8695           | R.ISISTSGGSFR.N                  | 1            | K2C5_HUMAN           |
| <b><i>Keratin, type II cytoskeletal 8 - Homo sapiens (Human)</i></b>           |               |                  |                                  |              |                      |
| P05787                                                                         | 3             | 4.9281           | K.LLEGEESRLESGM#QNMSIHTK.T       | 2            | K2C8_HUMAN           |
| P05787                                                                         | 2             | 3.1742           | R.LQAEIEGLK.G                    | 3            | K2C8_HUMAN           |
| P05787                                                                         | 2             | 3.9008           | R.LQAEIEGLKGQR.A                 | 3            | K2C8_HUMAN           |
| P05787                                                                         | 3             | 4.4949           | R.QLYEEEIRELQSQISDTSVVLSM#DNSR.S | 2            | K2C8_HUMAN           |
| P05787                                                                         | 2             | 3.0092           | R.SLDM#DSIIAEVK.A                | 2            | K2C8_HUMAN           |
| P05787                                                                         | 1             | 4.4679           | R.SLDMDSIIAEVK.A                 | 4            | K2C8_HUMAN           |
| P05787                                                                         | 3             | 5.0734           | R.SLDMDSIIAEVKAQYEDIANR.S        | 2            | K2C8_HUMAN           |
| P05787                                                                         | 2             | 3.0519           | R.SNM#DNMFESYINNLR.R             | 1            | K2C8_HUMAN           |
| P05787                                                                         | 3             | 4.9135           | R.SRAEAESM#YQIKYEELQSLAGK.H      | 1            | K2C8_HUMAN           |
| P05787                                                                         | 3             | 5.0873           | R.SRAEAESMYQIKYEELQSLAGK.H       | 2            | K2C8_HUMAN           |
| P05787                                                                         | 1             | 2.3737           | R.SYTSGPGRS.I                    | 2            | K2C8_HUMAN           |
| P05787                                                                         | 2             | 4.622            | R.LEGLTDEINFLR.Q                 | 4            | K2C8_HUMAN           |
| P05787                                                                         | 2             | 3.4523           | R.TEMENEFVLIKK.D                 | 3            | K2C8_HUMAN           |
| P05787                                                                         | 1             | 2.7503           | K.YEELQSLAGK.H                   | 1            | K2C8_HUMAN           |
| P05787                                                                         | 3             | 3.9241           | R.KLLEGEESRLESGMQNMSIHTK.T       | 1            | K2C8_HUMAN           |

| <i>Accession No*</i>                                                                                        | <i>Charge</i> | <i>XC(Max)**</i> | <i>Peptide*</i>                    | <i>TC***</i> | <i>Reference No*</i> |
|-------------------------------------------------------------------------------------------------------------|---------------|------------------|------------------------------------|--------------|----------------------|
| P05787                                                                                                      | 2             | 4.4687           | K.DVDEAYMKNVELESR.L                | 6            | K2C8_HUMAN           |
| P05787                                                                                                      | 2             | 3.9292           | K.LVSESSDVLPK.-                    | 9            | K2C8_HUMAN           |
| P05787                                                                                                      | 3             | 5.0706           | K.LLEGEESRLESGMQNM#SIHTK.T         | 3            | K2C8_HUMAN           |
| P05787                                                                                                      | 3             | 4.6203           | R.AEAESM#YQIKYEELQSLAGK.H          | 2            | K2C8_HUMAN           |
| P05787                                                                                                      | 3             | 4.0574           | R.AEAESMYQIKYEELQSLAGK.H           | 1            | K2C8_HUMAN           |
| P05787                                                                                                      | 2             | 3.6379           | R.ASLEAAIADAEQR.G                  | 2            | K2C8_HUMAN           |
| P05787                                                                                                      | 3             | 3.9196           | R.ASLEAAIADAEQRGELAIK.D            | 3            | K2C8_HUMAN           |
| P05787                                                                                                      | 3             | 5.901            | R.ASLEAAIADAEQRGELAIKDANAK.L       | 5            | K2C8_HUMAN           |
| P05787                                                                                                      | 3             | 4.7786           | R.DGKLVSESSDVLPK.-                 | 20           | K2C8_HUMAN           |
| P05787                                                                                                      | 1             | 2.4252           | R.ISSSSFSR.V                       | 2            | K2C8_HUMAN           |
| P05787                                                                                                      | 3             | 4.0016           | K.IETRDGKLVSESSDVLPK.-             | 1            | K2C8_HUMAN           |
| <b><i>Keratin-71 - Homo sapiens (Human)</i></b>                                                             |               |                  |                                    |              |                      |
| Q3SY84                                                                                                      | 2             | 2.776            | K.DTLGKGSSLSAPSK.K                 | 1            | Q3SY84_HUMA          |
| <b><i>Keratin-75 - Homo sapiens (Human)</i></b>                                                             |               |                  |                                    |              |                      |
| O95678                                                                                                      | 2             | 2.8377           | R.NTKQEISEMNRMIQR.L                | 1            | O95678_HUMAN         |
| <b><i>KH domain-containing, RNA-binding, signal transduction-associated protein 1 - Homo sapiens (H</i></b> |               |                  |                                    |              |                      |
| Q07666                                                                                                      | 2             | 4.3763           | R.SGSMDSGSAHPSVR.Q                 | 2            | SAM68_HUMAN          |
| Q07666                                                                                                      | 2             | 2.8042           | K.GAYREHPYGR.Y                     | 1            | SAM68_HUMAN          |
| Q07666                                                                                                      | 2             | 3.3628           | R.SGSM#DPSGAHPSVR.Q                | 2            | SAM68_HUMAN          |
| <b><i>KIAA0515 - Homo sapiens (Human)</i></b>                                                               |               |                  |                                    |              |                      |
| Q5JSZ9                                                                                                      | 3             | 4.2478           | R.DLFEERGEELYSAFDKK.A              | 1            | Q5JSZ9_HUMAN         |
| <b><i>KIAA1155 protein - Homo sapiens (Human)</i></b>                                                       |               |                  |                                    |              |                      |
| Q9ULR5                                                                                                      | 3             | 4.007            | R.DLPQAM#GQLQQQLNGLSVSEGHDSIEDILSK | 1            | Q9ULR5_HUMA          |
| <b><i>KIAA1276 protein - Homo sapiens (Human)</i></b>                                                       |               |                  |                                    |              |                      |
| Q9ULE4                                                                                                      | 2             | 2.9925           | K.SEKEIKQLEEEK.A                   | 1            | Q9ULE4_HUMA          |
| <b><i>KIAA1430 - Homo sapiens (Human)</i></b>                                                               |               |                  |                                    |              |                      |
| Q8N6E7                                                                                                      | 2             | 4.1188           | K.STETQPSSTAPK.C                   | 4            | Q8N6E7_HUMA          |
| <b><i>KIAA1843 protein - Homo sapiens (Human)</i></b>                                                       |               |                  |                                    |              |                      |
| Q96JI4                                                                                                      | 1             | 2.1168           | K.STAQNVEGIIVSAMFK.S               | 1            | Q96JI4_HUMAN         |
| <b><i>KIDINS220 protein - Homo sapiens (Human)</i></b>                                                      |               |                  |                                    |              |                      |
| A1L4N4                                                                                                      | 2             | 4.172            | R.TPSTVTLNNSAPANR.A                | 2            | A1L4N4_HUMAN         |
| <b><i>Kidney and brain protein - Homo sapiens (Human)</i></b>                                               |               |                  |                                    |              |                      |
| Q8IX03                                                                                                      | 2             | 3.2256           | R.RGDSQPYQALK.Y                    | 1            | WWC1_HUMAN           |
| Q8IX03                                                                                                      | 2             | 3.1708           | R.SSDSSTLSK.K                      | 3            | WWC1_HUMAN           |
| <b><i>Kinectin - Homo sapiens (Human)</i></b>                                                               |               |                  |                                    |              |                      |

| <i>Accession No*</i>                                             | <i>Charge</i> | <i>XC(Max)**</i> | <i>Peptide*</i>                | <i>TC***</i> | <i>Reference No*</i> |
|------------------------------------------------------------------|---------------|------------------|--------------------------------|--------------|----------------------|
| Q86UP2                                                           | 2             | 5.3459           | K.ALKEEIGNVQLEK.A              | 7            | KTN1_HUMAN           |
| Q86UP2                                                           | 1             | 3.107            | K.AQQLSITSK.V                  | 3            | KTN1_HUMAN           |
| Q86UP2                                                           | 2             | 2.7146           | R.ELKDLLTELQK.K                | 1            | KTN1_HUMAN           |
| <b><i>Kinesin heavy chain - Homo sapiens (Human)</i></b>         |               |                  |                                |              |                      |
| P33176                                                           | 2             | 3.1268           | K.LKTQMLDQEELLASTR.R           | 1            | KINH_HUMAN           |
| P33176                                                           | 2             | 3.4703           | K.SLTEYLQNVEQK.K               | 2            | KINH_HUMAN           |
| P33176                                                           | 2             | 5.1371           | R.GGGAFVQNSQPVAVR.G            | 5            | KINH_HUMAN           |
| <b><i>Kinesin light chain 2 - Homo sapiens (Human)</i></b>       |               |                  |                                |              |                      |
| Q9H0B6                                                           | 2             | 4.3027           | K.SVEEPTQPGGTGLSDSR.T          | 3            | KLC2_HUMAN           |
| Q9H0B6                                                           | 2             | 2.7035           | R.TLSSSSMDLSR.R                | 1            | KLC2_HUMAN           |
| <b><i>Kinesin-like protein KIF13B - Homo sapiens (Human)</i></b> |               |                  |                                |              |                      |
| Q9NQT8                                                           | 2             | 4.1642           | R.MEEAQPEMGPDLVQTMGAPALK.I     | 1            | KI13B_HUMAN          |
| Q9NQT8                                                           | 2             | 5.314            | K.GRWESQQDVSQTTVSR.G           | 3            | KI13B_HUMAN          |
| Q9NQT8                                                           | 2             | 3.2372           | R.WESQQDVSQTTVSR.G             | 1            | KI13B_HUMAN          |
| Q9NQT8                                                           | 2             | 3.4493           | R.IM#VQSASPDIR.V               | 2            | KI13B_HUMAN          |
| Q9NQT8                                                           | 3             | 4.6353           | R.M#EEAQPEMGPDLVQTMGAPALK.I    | 1            | KI13B_HUMAN          |
| <b><i>Kinesin-like protein KIF21A - Homo sapiens (Human)</i></b> |               |                  |                                |              |                      |
| Q7Z4S6                                                           | 2             | 4.599            | R.YLLDHFLSMGINK.G              | 2            | KI21A_HUMAN          |
| Q7Z4S6                                                           | 3             | 4.7824           | K.LSSSDAPAQDTGSSAAAVETDASR.T   | 3            | KI21A_HUMAN          |
| Q7Z4S6                                                           | 2             | 3.6224           | K.MTISNMEADMNR.L               | 2            | KI21A_HUMAN          |
| Q7Z4S6                                                           | 3             | 4.6187           | R.KLSSSDAPAQDTGSSAAAVETDASR.T  | 2            | KI21A_HUMAN          |
| Q7Z4S6                                                           | 3             | 3.7416           | R.LKQTEITSATQNQLLFHMLK.E       | 1            | KI21A_HUMAN          |
| Q7Z4S6                                                           | 2             | 2.7401           | R.RVTDIIMQK.M                  | 1            | KI21A_HUMAN          |
| <b><i>Kinesin-like protein KIF3C - Homo sapiens (Human)</i></b>  |               |                  |                                |              |                      |
| O14782                                                           | 2             | 2.7365           | R.GVIPNAFEHIFTHISR.S           | 1            | KIF3C_HUMAN          |
| <b><i>Krueppel-like factor 12 - Homo sapiens (Human)</i></b>     |               |                  |                                |              |                      |
| Q9Y4X4                                                           | 2             | 4.3593           | R.IPVVVQSVPVVYTA VR.S          | 3            | KLF12_HUMAN          |
| <b><i>Krueppel-like factor 16 - Homo sapiens (Human)</i></b>     |               |                  |                                |              |                      |
| Q9B XK1                                                          | 2             | 4.6749           | R.GGPGAAPGGASPASSSSAASSPSSGR.A | 2            | KLF16_HUMAN          |
| <b><i>L antigen family member 3 - Homo sapiens (Human)</i></b>   |               |                  |                                |              |                      |
| Q14657                                                           | 2             | 4.2718           | R.DADADAGGGADGGDGR.G           | 1            | LAGE3_HUMAN          |
| <b><i>Lactoylglutathione lyase - Homo sapiens (Human)</i></b>    |               |                  |                                |              |                      |
| Q04760                                                           | 2             | 5.2338           | K.GLAFIQDPDGYWIEILNPNK.M       | 4            | LGUL_HUMAN           |
| Q04760                                                           | 2             | 2.7058           | K.RFEELGVK.F                   | 1            | LGUL_HUMAN           |
| <b><i>Ladinin 1 - Homo sapiens (Human)</i></b>                   |               |                  |                                |              |                      |

| <i>Accession No*</i>                                                                      | <i>Charge</i> | <i>XC(Max)**</i> | <i>Peptide*</i>                 | <i>TC***</i> | <i>Reference No*</i> |
|-------------------------------------------------------------------------------------------|---------------|------------------|---------------------------------|--------------|----------------------|
| Q96GD8                                                                                    | 3             | 3.7121           | R.GPWALEEEESLVGREPEER.K         | 1            | Q96GD8_HUMA          |
| <b><i>Lamin-A/C - Homo sapiens (Human)</i></b>                                            |               |                  |                                 |              |                      |
| P02545                                                                                    | 3             | 6.616            | K.ASASGSGAQVGGPISSGSSASSVTVTR.S | 8            | LMNA_HUMAN           |
| P02545                                                                                    | 2             | 4.9454           | R.SVGGSGGGSFGDNLVTR.S           | 9            | LMNA_HUMAN           |
| <b><i>Lamina-associated polypeptide 2, isoforms beta/gamma - Homo sapiens (Human)</i></b> |               |                  |                                 |              |                      |
| P42167                                                                                    | 2             | 3.1528           | R.AEVGEKTEER.R                  | 5            | LAP2B_HUMAN          |
| P42167                                                                                    | 3             | 4.5412           | R.RVEHNQSYSQAGITETEWTSK.G       | 1            | LAP2B_HUMAN          |
| P42167                                                                                    | 3             | 4.1357           | K.HASPILPITEFSDIPR.R            | 1            | LAP2B_HUMAN          |
| <b><i>Lamin-B receptor - Homo sapiens (Human)</i></b>                                     |               |                  |                                 |              |                      |
| Q14739                                                                                    | 2             | 2.7138           | K.FADGEVVR.G                    | 1            | LBR_HUMAN            |
| Q14739                                                                                    | 2             | 3.3251           | R.SASASHQADIK.E                 | 2            | LBR_HUMAN            |
| <b><i>Lamin-B1 - Homo sapiens (Human)</i></b>                                             |               |                  |                                 |              |                      |
| P20700                                                                                    | 2             | 3.9819           | K.NSQGEEVAQR.S                  | 3            | LMNB1_HUMAN          |
| P20700                                                                                    | 3             | 7.1877           | R.EMAEIRDQMQQQLNDYEQLLDVK.L     | 2            | LMNB1_HUMAN          |
| P20700                                                                                    | 3             | 6.1389           | K.SLEGDLEDLKDQIAQLEASLAAAKK.Q   | 1            | LMNB1_HUMAN          |
| P20700                                                                                    | 2             | 3.6768           | K.NQNSWGTGEDVK.V                | 2            | LMNB1_HUMAN          |
| P20700                                                                                    | 3             | 5.4397           | R.EM#AEIRDQMQQQLNDYEQLLDVK.L    | 1            | LMNB1_HUMAN          |
| <b><i>Lamin-B2 - Homo sapiens (Human)</i></b>                                             |               |                  |                                 |              |                      |
| Q03252                                                                                    | 2             | 2.7912           | K.SVFEEVRETR.R                  | 1            | LMNB2_HUMAN          |
| Q03252                                                                                    | 2             | 2.8039           | R.RVLDETAR.E                    | 1            | LMNB2_HUMAN          |
| Q03252                                                                                    | 2             | 3.5227           | R.RLVEVDSSR.Q                   | 2            | LMNB2_HUMAN          |
| Q03252                                                                                    | 2             | 3.4332           | R.AGGPATPLSPTR.L                | 1            | LMNB2_HUMAN          |
| Q03252                                                                                    | 2             | 4.3694           | R.ATSSSSGSLSATGR.L              | 4            | LMNB2_HUMAN          |
| Q03252                                                                                    | 3             | 3.83             | R.VKDLESLFHR.S                  | 2            | LMNB2_HUMAN          |
| Q03252                                                                                    | 2             | 3.2123           | K.MAQALEELR.S                   | 3            | LMNB2_HUMAN          |
| Q03252                                                                                    | 2             | 4.3346           | K.LSSDQNDKAASAAR.E              | 2            | LMNB2_HUMAN          |
| Q03252                                                                                    | 2             | 2.7053           | K.LRAELDEVNK.S                  | 1            | LMNB2_HUMAN          |
| Q03252                                                                                    | 2             | 3.1607           | K.ISEKEEVTR.E                   | 2            | LMNB2_HUMAN          |
| Q03252                                                                                    | 2             | 2.8434           | K.GQSSWGTGESFR.T                | 1            | LMNB2_HUMAN          |
| Q03252                                                                                    | 2             | 2.9529           | K.ALYESELADAR.R                 | 1            | LMNB2_HUMAN          |
| Q03252                                                                                    | 3             | 4.2358           | K.MAQALEELRSQHDEQVR.L           | 1            | LMNB2_HUMAN          |
| Q03252                                                                                    | 2             | 5.1062           | R.MRLESLSYQLSGLQK.Q             | 5            | LMNB2_HUMAN          |
| <b><i>Laminin subunit alpha-4 precursor - Homo sapiens (Human)</i></b>                    |               |                  |                                 |              |                      |
| Q16363                                                                                    | 3             | 4.481            | K.ESM#DTINHASQLVEQAHDNR.D       | 2            | LAMA4_HUMAN          |
| Q16363                                                                                    | 2             | 2.737            | R.ELVDEEADEAYELLSQAESWQR.L      | 1            | LAMA4_HUMAN          |

| <i>Accession No*</i> | <i>Charge</i> | <i>XC(Max)**</i> | <i>Peptide*</i>                    | <i>TC***</i> | <i>Reference No*</i> |
|----------------------|---------------|------------------|------------------------------------|--------------|----------------------|
| Q16363               | 2             | 3.2856           | R.DKIQEINNK.M                      | 4            | LAMA4_HUMAN          |
| Q16363               | 2             | 4.2445           | K.MLYYGEEHELSPK.E                  | 1            | LAMA4_HUMAN          |
| Q16363               | 2             | 3.6416           | K.GKIEQTQASEK.K                    | 3            | LAMA4_HUMAN          |
| Q16363               | 3             | 4.7118           | K.ESMDTINHASQLVEQAHDMDR.D          | 2            | LAMA4_HUMAN          |
| Q16363               | 3             | 5.0095           | R.TLFPVVLEQLDDYNAK.L               | 2            | LAMA4_HUMAN          |
| Q16363               | 2             | 3.6426           | K.AESSSDEAVADTSR.R                 | 7            | LAMA4_HUMAN          |
| Q16363               | 4             | 5.746            | K.ESMDTINHASQLVEQAHDMDRDKIQEINNK.M | 1            | LAMA4_HUMAN          |

***Laminin subunit alpha-5 precursor - Homo sapiens (Human)***

|        |   |        |                                 |   |             |
|--------|---|--------|---------------------------------|---|-------------|
| O15230 | 4 | 5.0777 | R.HETAQQLEVLQQSTSLGQDARR.L      | 1 | LAMA5_HUMAN |
| O15230 | 2 | 3.1162 | R.RLGGQAVGTR.D                  | 3 | LAMA5_HUMAN |
| O15230 | 2 | 3.4789 | R.LGLVWAALQGAR.T                | 2 | LAMA5_HUMAN |
| O15230 | 4 | 6.2554 | R.LGGQAVGTRDQASQLLAGTEATLGHAK.T | 1 | LAMA5_HUMAN |
| O15230 | 2 | 3.182  | R.GQLQLVEGNFR.H                 | 1 | LAMA5_HUMAN |
| O15230 | 2 | 5.8021 | R.DLGAPQAAAEEAELAAQR.L          | 4 | LAMA5_HUMAN |
| O15230 | 2 | 4.8271 | K.AVAEEAQDTATR.V                | 4 | LAMA5_HUMAN |
| O15230 | 2 | 3.4512 | R.AIEASNAYSRI                   | 1 | LAMA5_HUMAN |

***Laminin subunit beta-1 precursor - Homo sapiens (Human)***

|        |   |        |                            |   |             |
|--------|---|--------|----------------------------|---|-------------|
| P07942 | 2 | 3.1973 | R.DRVEDVMMER.E             | 2 | LAMB1_HUMAN |
| P07942 | 2 | 3.0677 | R.SLLKDISQK.V              | 2 | LAMB1_HUMAN |
| P07942 | 2 | 3.5851 | R.RKAEMLQNEAK.T            | 1 | LAMB1_HUMAN |
| P07942 | 2 | 3.2104 | R.RKAEM#LQNEAK.T           | 2 | LAMB1_HUMAN |
| P07942 | 3 | 5.183  | R.NFLTQDSADLDSIEAVANEVLK.M | 2 | LAMB1_HUMAN |
| P07942 | 1 | 2.1085 | R.LLDELAK.L                | 1 | LAMB1_HUMAN |
| P07942 | 2 | 4.0072 | R.KAAQNSGEAEYIEK.V         | 2 | LAMB1_HUMAN |
| P07942 | 2 | 3.8134 | R.KAEM#LQNEAK.T            | 4 | LAMB1_HUMAN |
| P07942 | 2 | 3.6481 | R.YLEDKAQELAR.L            | 2 | LAMB1_HUMAN |
| P07942 | 2 | 2.8789 | R.IPSWTGAGFVR.V            | 2 | LAMB1_HUMAN |
| P07942 | 3 | 4.9519 | K.AM#DLDQDVLSALAEVEQLSK.M  | 9 | LAMB1_HUMAN |
| P07942 | 3 | 5.9733 | K.VTADMVKEALEEAEKAQVAAEK.A | 2 | LAMB1_HUMAN |
| P07942 | 2 | 3.4537 | R.KAEMLQNEAK.T             | 2 | LAMB1_HUMAN |
| P07942 | 2 | 3.5679 | K.AAQNSGEAEYIEK.V          | 1 | LAMB1_HUMAN |
| P07942 | 3 | 5.3803 | K.AMDLDQDVLSALAEVEQLSK.M   | 5 | LAMB1_HUMAN |
| P07942 | 2 | 5.2829 | K.EALEEAEKAQVAAEK.A        | 3 | LAMB1_HUMAN |
| P07942 | 2 | 2.8018 | K.ISGVIGPYR.E              | 1 | LAMB1_HUMAN |
| P07942 | 2 | 3.0314 | K.KVENLIAK.K               | 1 | LAMB1_HUMAN |
| P07942 | 2 | 2.7333 | K.MDKSNEELR.N              | 1 | LAMB1_HUMAN |

| <i>Accession No*</i>                                                   | <i>Charge</i> | <i>XC(Max)**</i> | <i>Peptide*</i>                    | <i>TC***</i> | <i>Reference No*</i> |
|------------------------------------------------------------------------|---------------|------------------|------------------------------------|--------------|----------------------|
| P07942                                                                 | 2             | 3.3524           | K.TLLAQANSK.L                      | 6            | LAMB1_HUMAN          |
| P07942                                                                 | 3             | 4.3273           | K.VTADM#VKEALEEAEKAQVAEK.A         | 1            | LAMB1_HUMAN          |
| <b><i>Laminin subunit beta-2 precursor - Homo sapiens (Human)</i></b>  |               |                  |                                    |              |                      |
| P55268                                                                 | 2             | 2.7048           | R.LVTPGETPSWTGSGFVR.L              | 1            | LAMB2_HUMAN          |
| P55268                                                                 | 1             | 2.1911           | R.AGYTGLR.C                        | 1            | LAMB2_HUMAN          |
| <b><i>Laminin subunit gamma-1 precursor - Homo sapiens (Human)</i></b> |               |                  |                                    |              |                      |
| P11047                                                                 | 3             | 4.6678           | R.LQNIRNTIETGNLAEQAR.A             | 2            | LAMC1_HUMAN          |
| P11047                                                                 | 2             | 5.0365           | R.EAQQALGSAAADATEAK.N              | 6            | LAMC1_HUMAN          |
| P11047                                                                 | 2             | 3.1825           | R.KVSDLENEAK.K                     | 2            | LAMC1_HUMAN          |
| P11047                                                                 | 2             | 3.7877           | R.LNTFGDEVFNPK.V                   | 3            | LAMC1_HUMAN          |
| P11047                                                                 | 2             | 4.3951           | R.DTLQEANDILNMLK.D                 | 1            | LAMC1_HUMAN          |
| P11047                                                                 | 2             | 4.3668           | R.LSAEDLVLEGAGLR.V                 | 6            | LAMC1_HUMAN          |
| P11047                                                                 | 2             | 4.9328           | R.NTIEETGNLAEQAR.A                 | 7            | LAMC1_HUMAN          |
| P11047                                                                 | 2             | 4.3705           | R.SAGYLDVTLASAR.P                  | 3            | LAMC1_HUMAN          |
| P11047                                                                 | 2             | 3.0705           | R.DIEEIMKDIR.N                     | 2            | LAMC1_HUMAN          |
| P11047                                                                 | 3             | 5.1179           | R.VKLQELESILANLGTGDEM#VTDQAFEDR.L  | 2            | LAMC1_HUMAN          |
| P11047                                                                 | 3             | 3.8966           | K.KQEAAIMDYNRDIEEIMK.D             | 1            | LAMC1_HUMAN          |
| P11047                                                                 | 3             | 5.253            | R.VKLQELESILANLGTGDEM#VTDQAFEDRLK. | 1            | LAMC1_HUMAN          |
| P11047                                                                 | 2             | 5.0478           | R.TFAEVTDLNNEVNMLK.Q               | 4            | LAMC1_HUMAN          |
| P11047                                                                 | 1             | 2.9249           | K.VSDLENEAK.K                      | 3            | LAMC1_HUMAN          |
| P11047                                                                 | 2             | 4.4597           | K.TREAQQALGSAAADATEAK.N            | 1            | LAMC1_HUMAN          |
| P11047                                                                 | 2             | 3.6877           | K.TLPSGCFNTPSIEKP.-                | 4            | LAMC1_HUMAN          |
| P11047                                                                 | 2             | 3.4037           | K.TEQQTADQLLAR.A                   | 2            | LAMC1_HUMAN          |
| P11047                                                                 | 2             | 3.7974           | K.SYYYAISDFAVGGR.C                 | 3            | LAMC1_HUMAN          |
| P11047                                                                 | 2             | 2.8114           | K.LKDYEDLREDMR.G                   | 1            | LAMC1_HUMAN          |
| P11047                                                                 | 3             | 5.9521           | K.GRDTLQEANDILNMLKDFDR.R           | 2            | LAMC1_HUMAN          |
| P11047                                                                 | 2             | 4.9785           | K.GKTEQQTADQLLAR.A                 | 6            | LAMC1_HUMAN          |
| P11047                                                                 | 2             | 4.4728           | K.DGFFGNPLAPNPADK.C                | 2            | LAMC1_HUMAN          |
| P11047                                                                 | 2             | 3.1564           | K.ALAEAAKK.G                       | 3            | LAMC1_HUMAN          |
| P11047                                                                 | 1             | 2.2465           | K.ALAEAAK.K                        | 3            | LAMC1_HUMAN          |
| P11047                                                                 | 2             | 3.3022           | K.AFDITYVR.L                       | 2            | LAMC1_HUMAN          |
| P11047                                                                 | 2             | 3.2244           | K.MEAENLEQLIDQK.L                  | 2            | LAMC1_HUMAN          |
| <b><i>La-related protein 1 - Homo sapiens (Human)</i></b>              |               |                  |                                    |              |                      |
| Q6PKG0                                                                 | 2             | 3.6319           | K.SVQPQSHKQPTR.K                   | 2            | LARP1_HUMAN          |
| Q6PKG0                                                                 | 3             | 4.6414           | K.VGDFGDAINWPTPGEIAHK.S            | 5            | LARP1_HUMAN          |

| <i>Accession No*</i>                                                                                          | <i>Charge</i> | <i>XC(Max)**</i> | <i>Peptide*</i>                  | <i>TC***</i> | <i>Reference No*</i> |
|---------------------------------------------------------------------------------------------------------------|---------------|------------------|----------------------------------|--------------|----------------------|
| Q6PKG0                                                                                                        | 2             | 3.1015           | R.SLPTTVPESPNYR.N                | 1            | LARP1_HUMAN          |
| Q6PKG0                                                                                                        | 2             | 4.1029           | K.WTSQHSNTQTLGK.-                | 2            | LARP1_HUMAN          |
| Q6PKG0                                                                                                        | 2             | 3.1523           | R.DFVEAPPPK.V                    | 2            | LARP1_HUMAN          |
| Q6PKG0                                                                                                        | 3             | 4.5863           | R.EQFDLTPEPPVDPNQEVPPGPPR.F      | 3            | LARP1_HUMAN          |
| Q6PKG0                                                                                                        | 4             | 5.4088           | R.ESPRPLQLPGAEGPAISDGEEGGGEPGAGG | 1            | LARP1_HUMAN          |
| Q6PKG0                                                                                                        | 2             | 2.9208           | R.FQQVPTDALANK.L                 | 1            | LARP1_HUMAN          |
| Q6PKG0                                                                                                        | 3             | 4.7525           | R.FQQVPTDALANKLFGAPEPSTIAR.S     | 1            | LARP1_HUMAN          |
| Q6PKG0                                                                                                        | 3             | 3.9928           | R.HSSNPPLSHVGVWVMSR.E            | 2            | LARP1_HUMAN          |
| Q6PKG0                                                                                                        | 2             | 2.7702           | R.KFDGVEGPR.T                    | 1            | LARP1_HUMAN          |
| Q6PKG0                                                                                                        | 3             | 4.1612           | K.SDESGEKNGDEDCQR.G              | 2            | LARP1_HUMAN          |
| <b><i>Large proline-rich protein BAT3 - Homo sapiens (Human)</i></b>                                          |               |                  |                                  |              |                      |
| P46379                                                                                                        | 2             | 3.1172           | R.DLEAPEVQESYR.Q                 | 1            | BAT3_HUMAN           |
| <b><i>Lariat debranching enzyme - Homo sapiens (Human)</i></b>                                                |               |                  |                                  |              |                      |
| Q9UK59                                                                                                        | 2             | 2.8669           | R.LSDEHEPEQR.K                   | 2            | DBR1_HUMAN           |
| <b><i>Latent-transforming growth factor beta-binding protein 2 precursor - Homo sapiens (Human)</i></b>       |               |                  |                                  |              |                      |
| Q14767                                                                                                        | 2             | 4.3089           | K.QSTFTLPLSNQLASVNPVLK.V         | 2            | LTBP2_HUMAN          |
| Q14767                                                                                                        | 2             | 4.3221           | R.EQDAPVAGLQPVER.A               | 4            | LTBP2_HUMAN          |
| Q14767                                                                                                        | 3             | 4.2657           | R.GAGGQSM#SEAPTGDHAPAPTR.M       | 2            | LTBP2_HUMAN          |
| Q14767                                                                                                        | 2             | 4.2432           | R.GAGGQSMSEAPTGDHAPAPTR.M        | 2            | LTBP2_HUMAN          |
| Q14767                                                                                                        | 2             | 3.4465           | R.RSSAAGEGTLAR.A                 | 1            | LTBP2_HUMAN          |
| Q14767                                                                                                        | 2             | 3.714            | R.SLGPCTCTPLAQR.I                | 1            | LTBP2_HUMAN          |
| Q14767                                                                                                        | 2             | 4.8938           | R.SSEVYAQLCNVAR.I                | 3            | LTBP2_HUMAN          |
| Q14767                                                                                                        | 2             | 3.6107           | R.STPLGQQQPAPR.T                 | 3            | LTBP2_HUMAN          |
| <b><i>Latent-transforming growth factor beta-binding protein 3 precursor - Homo sapiens (Human)</i></b>       |               |                  |                                  |              |                      |
| Q9NS15                                                                                                        | 2             | 4.2405           | R.FCQVPAGGAGGGTGGSGPGLSR.T       | 1            | LTBP3_HUMAN          |
| Q9NS15                                                                                                        | 2             | 3.3751           | R.GAGGGGALAR.E                   | 3            | LTBP3_HUMAN          |
| <b><i>Latent-transforming growth factor beta-binding protein, isoform 1L precursor - Homo sapiens (Hu</i></b> |               |                  |                                  |              |                      |
| Q14766                                                                                                        | 2             | 3.9475           | R.SKVPQETQSGGGSRL                | 3            | LTB1L_HUMAN          |
| <b><i>Latent-transforming growth factor beta-binding protein, isoform 1S precursor - Homo sapiens (Hu</i></b> |               |                  |                                  |              |                      |
| P22064                                                                                                        | 2             | 3.3509           | K.LYQHSQQPGK.A                   | 2            | LTB1S_HUMAN          |
| <b><i>Layilin precursor - Homo sapiens (Human)</i></b>                                                        |               |                  |                                  |              |                      |
| Q6UX15                                                                                                        | 3             | 3.7587           | R.DGGQLVSIESEDEQKLIK.F           | 1            | LAYN_HUMAN           |
| <b><i>Lck-interacting transmembrane adapter 1 - Homo sapiens (Human)</i></b>                                  |               |                  |                                  |              |                      |
| Q9H400                                                                                                        | 2             | 2.7403           | R.SPQEPQQGK.T                    | 1            | LIME1_HUMAN          |
| <b><i>Leiomodin 1 - Homo sapiens (Human)</i></b>                                                              |               |                  |                                  |              |                      |



| <i>Accession No*</i>                                                             | <i>Charge</i> | <i>XC(Max)**</i> | <i>Peptide*</i>               | <i>TC***</i> | <i>Reference No*</i> |
|----------------------------------------------------------------------------------|---------------|------------------|-------------------------------|--------------|----------------------|
| Q5VUU2                                                                           | 3             | 4.0584           | K.KGGAPAAPPPPPPLAPPLIM#ENLK.N | 1            | Q5VUU2_HUMA          |
| Q5VUU2                                                                           | 3             | 3.8672           | K.KGGAPAAPPPPPPLAPPLIMENLK.N  | 1            | Q5VUU2_HUMA          |
| <b><i>LEM domain-containing protein 2 - Homo sapiens (Human)</i></b>             |               |                  |                               |              |                      |
| Q8NC56                                                                           | 2             | 3.3121           | R.LREDAPLR.A                  | 2            | LEMD2_HUMAN          |
| <b><i>Leucine zipper protein 1 - Homo sapiens (Human)</i></b>                    |               |                  |                               |              |                      |
| Q86V48                                                                           | 2             | 3.7202           | R.VGPSSGDAPEPSSR.R            | 3            | LUZP1_HUMAN          |
| Q86V48                                                                           | 2             | 3.3624           | K.SREQPSVLSR.Y                | 1            | LUZP1_HUMAN          |
| Q86V48                                                                           | 2             | 3.8145           | K.VTSSITIYPSDSSSPR.A          | 1            | LUZP1_HUMAN          |
| Q86V48                                                                           | 2             | 3.6646           | R.EFALNNENYSLSNR.Q            | 3            | LUZP1_HUMAN          |
| Q86V48                                                                           | 3             | 5.0149           | R.EKPDSDDDLDIASLVTAK.L        | 5            | LUZP1_HUMAN          |
| Q86V48                                                                           | 2             | 3.5892           | R.IEDGISSTLPSK.E              | 3            | LUZP1_HUMAN          |
| Q86V48                                                                           | 2             | 4.65             | R.MAELEKLEEFASR.S             | 3            | LUZP1_HUMAN          |
| Q86V48                                                                           | 2             | 3.1023           | R.SSIIKPSDPVER.N              | 1            | LUZP1_HUMAN          |
| Q86V48                                                                           | 2             | 3.2384           | R.SSTDFSELEQPR.S              | 2            | LUZP1_HUMAN          |
| Q86V48                                                                           | 2             | 5.2462           | R.TSLFENDKDAGMENESVK.S        | 3            | LUZP1_HUMAN          |
| Q86V48                                                                           | 2             | 3.0998           | K.IM#GGSGTETTLEK.Q            | 2            | LUZP1_HUMAN          |
| Q86V48                                                                           | 2             | 2.9198           | K.SLTLSFVSR.K                 | 1            | LUZP1_HUMAN          |
| Q86V48                                                                           | 2             | 3.3844           | R.TFSDTTHGSVPSDPLGR.A         | 1            | LUZP1_HUMAN          |
| Q86V48                                                                           | 2             | 4.0435           | K.SHSAPSEVGFSDAR.H            | 2            | LUZP1_HUMAN          |
| Q86V48                                                                           | 2             | 3.4751           | K.NVESTNSNAYTQR.S             | 2            | LUZP1_HUMAN          |
| Q86V48                                                                           | 2             | 4.3967           | K.LVNTTITPEPEPKQPNSR.E        | 2            | LUZP1_HUMAN          |
| Q86V48                                                                           | 2             | 3.0936           | K.KISSELEMLR.V                | 2            | LUZP1_HUMAN          |
| Q86V48                                                                           | 2             | 5.1118           | K.ASHM#GVSTDSGTQETK.K         | 4            | LUZP1_HUMAN          |
| Q86V48                                                                           | 2             | 3.9564           | K.IMGGSGTETTLEK.Q             | 2            | LUZP1_HUMAN          |
| Q86V48                                                                           | 3             | 5.1972           | K.HFESLEEEELKK.M              | 3            | LUZP1_HUMAN          |
| Q86V48                                                                           | 2             | 3.4924           | K.EKLEEEENLTR.E               | 1            | LUZP1_HUMAN          |
| Q86V48                                                                           | 2             | 2.7414           | K.DLNQEIEKTK.T                | 1            | LUZP1_HUMAN          |
| Q86V48                                                                           | 2             | 4.2673           | K.ASHMGVSTDSGTQETK.K          | 4            | LUZP1_HUMAN          |
| Q86V48                                                                           | 3             | 5.7102           | K.SKNNLDQDNYLSEQNKNK.L        | 2            | LUZP1_HUMAN          |
| Q86V48                                                                           | 2             | 2.9712           | K.ISSELEMLR.V                 | 1            | LUZP1_HUMAN          |
| <b><i>Leucine zipper putative tumor suppressor 1 - Homo sapiens (Human)</i></b>  |               |                  |                               |              |                      |
| Q9Y250                                                                           | 2             | 3.9668           | K.VNLLEQELQELR.A              | 3            | LZTS1_HUMAN          |
| Q9Y250                                                                           | 2             | 3.9681           | K.QLQQSYVAMYQR.N              | 4            | LZTS1_HUMAN          |
| <b><i>Leucine-rich alpha-2-glycoprotein precursor - Homo sapiens (Human)</i></b> |               |                  |                               |              |                      |
| P02750                                                                           | 2             | 4.0333           | R.VAAGAFQGLR.Q                | 2            | A2GL_HUMAN           |

| <i>Accession No*</i>                                                                                        | <i>Charge</i> | <i>XC(Max)**</i> | <i>Peptide*</i>                   | <i>TC***</i> | <i>Reference No*</i> |
|-------------------------------------------------------------------------------------------------------------|---------------|------------------|-----------------------------------|--------------|----------------------|
| P02750                                                                                                      | 3             | 3.757            | R.NALTGLPPGLFQASATLDTLVLK.E       | 1            | A2GL_HUMAN           |
| P02750                                                                                                      | 2             | 2.7177           | R.TLDLGENQLETLPPDLLR.G            | 1            | A2GL_HUMAN           |
| <b><i>Leucine-rich repeat and calponin homology domain-containing protein 3 precursor - Homo sapien</i></b> |               |                  |                                   |              |                      |
| Q96I18                                                                                                      | 2             | 3.2301           | R.EAQLAALQYEEEKIR.T               | 1            | LRCH3_HUMAN          |
| <b><i>Leucine-rich repeat and calponin homology domain-containing protein 4 - Homo sapiens (Human)</i></b>  |               |                  |                                   |              |                      |
| O75427                                                                                                      | 2             | 2.8139           | R.REEPAGEER.R                     | 2            | LRCH4_HUMAN          |
| <b><i>Leucine-rich repeat flightless-interacting protein 1 - Homo sapiens (Human)</i></b>                   |               |                  |                                   |              |                      |
| Q32MZ4                                                                                                      | 2             | 5.2539           | R.KSAVEAQNEVTENPK.Q               | 2            | LRRF1_HUMAN          |
| Q32MZ4                                                                                                      | 2             | 4.9336           | K.SAVEAQNEVTENPK.Q                | 5            | LRRF1_HUMAN          |
| Q32MZ4                                                                                                      | 2             | 5.4081           | R.NMPGLSAATLASLGGTSSR.R           | 2            | LRRF1_HUMAN          |
| Q32MZ4                                                                                                      | 3             | 4.7039           | R.KSAVEAQNEVTENPKQK.I             | 1            | LRRF1_HUMAN          |
| Q32MZ4                                                                                                      | 3             | 4.8381           | R.KALDSNSLENDLSDAPGREPGHFNPESR.E  | 3            | LRRF1_HUMAN          |
| Q32MZ4                                                                                                      | 2             | 3.3354           | R.EIDCLSPEAQK.L                   | 3            | LRRF1_HUMAN          |
| Q32MZ4                                                                                                      | 3             | 4.9965           | R.ASEVEVKNEIVANVGKR.E             | 2            | LRRF1_HUMAN          |
| Q32MZ4                                                                                                      | 2             | 5.0529           | R.AGGEELDEGVAKDNAK.I              | 6            | LRRF1_HUMAN          |
| Q32MZ4                                                                                                      | 2             | 4.1568           | R.AGGEELDEGVAK.D                  | 4            | LRRF1_HUMAN          |
| Q32MZ4                                                                                                      | 2             | 5.9506           | K.SAVEAQNEVTENPKQK.I              | 3            | LRRF1_HUMAN          |
| Q32MZ4                                                                                                      | 2             | 3.6546           | R.NM#PGLSAATLASLGGTSSR.R          | 1            | LRRF1_HUMAN          |
| Q32MZ4                                                                                                      | 2             | 2.7001           | K.NEIVANVGKR.E                    | 1            | LRRF1_HUMAN          |
| Q32MZ4                                                                                                      | 2             | 4.192            | K.ELTYQNTDLSEIKEEEQVK.S           | 2            | LRRF1_HUMAN          |
| Q32MZ4                                                                                                      | 3             | 5.3224           | K.HAHSILQFQFAEVK.E                | 3            | LRRF1_HUMAN          |
| Q32MZ4                                                                                                      | 2             | 3.4188           | K.EALKQREEMLEK.H                  | 2            | LRRF1_HUMAN          |
| Q32MZ4                                                                                                      | 2             | 3.9665           | K.IAAESSENVDCPENPK.I              | 4            | LRRF1_HUMAN          |
| Q32MZ4                                                                                                      | 2             | 3.6739           | K.IDGATQSSPAEPK.S                 | 7            | LRRF1_HUMAN          |
| Q32MZ4                                                                                                      | 2             | 3.6636           | K.IDGATQSSPAEPKSEDADR.C           | 2            | LRRF1_HUMAN          |
| Q32MZ4                                                                                                      | 3             | 7.0015           | K.IKLDGKLDQEGDDVQTAAEEVLADGDTLDFE | 1            | LRRF1_HUMAN          |
| Q32MZ4                                                                                                      | 3             | 7.1045           | K.LDGKLDQEGDDVQTAAEEVLADGDTLDFEDD | 1            | LRRF1_HUMAN          |
| Q32MZ4                                                                                                      | 2             | 3.7548           | K.M#TKEELNALK.S                   | 2            | LRRF1_HUMAN          |
| <b><i>Leucine-rich repeat flightless-interacting protein 2 - Homo sapiens (Human)</i></b>                   |               |                  |                                   |              |                      |
| Q9Y608                                                                                                      | 3             | 5.0093           | R.TALDKIEEMEMTNSHLAK.R            | 2            | LRRF2_HUMAN          |
| Q9Y608                                                                                                      | 2             | 3.5476           | K.ELKESLSEVEEK.Y                  | 2            | LRRF2_HUMAN          |
| Q9Y608                                                                                                      | 3             | 4.5136           | K.LSKAEQDITTLEQSISR.L             | 2            | LRRF2_HUMAN          |
| Q9Y608                                                                                                      | 4             | 5.8758           | K.LSKAEQDITTLEQSISRLEGQVLR.Y      | 2            | LRRF2_HUMAN          |
| Q9Y608                                                                                                      | 2             | 3.2044           | K.MEELKEGLR.Q                     | 2            | LRRF2_HUMAN          |
| Q9Y608                                                                                                      | 2             | 4.4053           | R.FSAEDEALSNIAR.E                 | 4            | LRRF2_HUMAN          |

| <i>Accession No*</i>                                                                               | <i>Charge</i> | <i>XC(Max)**</i> | <i>Peptide*</i>                  | <i>TC***</i> | <i>Reference No*</i> |
|----------------------------------------------------------------------------------------------------|---------------|------------------|----------------------------------|--------------|----------------------|
| Q9Y608                                                                                             | 3             | 4.8458           | R.KLAGEKEELLSQIR.K               | 5            | LRRF2_HUMAN          |
| Q9Y608                                                                                             | 2             | 4.1006           | R.NSASATTPLSGNSR.R               | 4            | LRRF2_HUMAN          |
| Q9Y608                                                                                             | 3             | 4.4211           | R.TALDKIEEMEM#TNSHLAK.R          | 1            | LRRF2_HUMAN          |
| Q9Y608                                                                                             | 2             | 4.8823           | K.AEQDITTLLEQSISR.L              | 3            | LRRF2_HUMAN          |
| <b><i>Leucine-rich repeat neuronal protein 3 precursor - Homo sapiens (Human)</i></b>              |               |                  |                                  |              |                      |
| Q9H3W5                                                                                             | 2             | 2.884            | K.PTFALGELYPLINLWEAGKEK.S        | 1            | LRRN3_HUMAN          |
| <b><i>Leucine-rich repeat protein SHOC-2 - Homo sapiens (Human)</i></b>                            |               |                  |                                  |              |                      |
| Q9UQ13                                                                                             | 2             | 2.8493           | K.RPNPAPGTR.K                    | 1            | SHOC2_HUMAN          |
| <b><i>Leucine-rich repeat-containing protein 1 - Homo sapiens (Human)</i></b>                      |               |                  |                                  |              |                      |
| Q9BTT6                                                                                             | 2             | 4.1427           | R.FVEDEKDEEDNETR.T               | 3            | LRRC1_HUMAN          |
| <b><i>Leucine-rich repeat-containing protein 16. - Homo sapiens (Human)</i></b>                    |               |                  |                                  |              |                      |
| Q5VZK9                                                                                             | 2             | 3.0607           | R.SDGGGAVPK.L                    | 1            | Q5VZK9_HUMA          |
| <b><i>Leucine-rich repeat-containing protein 47 - Homo sapiens (Human)</i></b>                     |               |                  |                                  |              |                      |
| Q8N1G4                                                                                             | 2             | 4.1642           | R.EGGDGEEQDVGDAGR.L              | 8            | LRC47_HUMAN          |
| Q8N1G4                                                                                             | 2             | 4.7906           | R.NALGPGLSPELGPLPALR.V           | 4            | LRC47_HUMAN          |
| <b><i>Leucine-rich repeat-containing protein 59 - Homo sapiens (Human)</i></b>                     |               |                  |                                  |              |                      |
| Q96AG4                                                                                             | 2             | 2.7841           | K.AVQADQERER.Q                   | 1            | LRC59_HUMAN          |
| Q96AG4                                                                                             | 3             | 5.4959           | K.LDGNELDLSLSDLNEVPVKELAALPK.A   | 2            | LRC59_HUMAN          |
| Q96AG4                                                                                             | 3             | 6.6307           | R.DKLDGNELDLSLSDLNEVPVKELAALPK.A | 2            | LRC59_HUMAN          |
| <b><i>Leucyl-cystinyl aminopeptidase - Homo sapiens (Human)</i></b>                                |               |                  |                                  |              |                      |
| Q9UIQ6                                                                                             | 3             | 5.2854           | R.GLGEHEM#EEDEEDYESSAK.L         | 3            | LCAP_HUMAN           |
| Q9UIQ6                                                                                             | 2             | 4.7949           | R.GLGEHEMEEDEEDYESSAK.L          | 4            | LCAP_HUMAN           |
| <b><i>Leukocyte receptor cluster member 1 - Homo sapiens (Human)</i></b>                           |               |                  |                                  |              |                      |
| Q96BZ8                                                                                             | 2             | 3.3057           | R.ALQEGQPEEDETDDR.R              | 2            | LENG1_HUMAN          |
| Q96BZ8                                                                                             | 2             | 3.0156           | R.SRAEALLAR.V                    | 1            | LENG1_HUMAN          |
| Q96BZ8                                                                                             | 2             | 4.048            | R.YNSQFNPQLAR.R                  | 4            | LENG1_HUMAN          |
| Q96BZ8                                                                                             | 2             | 3.048            | R.ALQEGQPEEDETDDR.R              | 1            | LENG1_HUMAN          |
| <b><i>Leukocyte-associated immunoglobulin-like receptor 1 precursor - Homo sapiens (Human)</i></b> |               |                  |                                  |              |                      |
| Q6GTX8                                                                                             | 3             | 4.8003           | R.AVSPQSTKPMASITYAAVAR.H         | 1            | LAIR1_HUMAN          |
| Q6GTX8                                                                                             | 3             | 4.9569           | R.FRIDSVSEGNAGPYR.C              | 4            | LAIR1_HUMAN          |
| <b><i>Leupaxin - Homo sapiens (Human)</i></b>                                                      |               |                  |                                  |              |                      |
| O60711                                                                                             | 3             | 3.8362           | R.STLQDSDEYSNPAPLPLDQHSR.K       | 1            | LPXN_HUMAN           |
| <b><i>Leydig cell tumor 10 kDa protein homolog - Homo sapiens (Human)</i></b>                      |               |                  |                                  |              |                      |
| Q9UNZ5                                                                                             | 2             | 2.9326           | K.NLEVGIRK.K                     | 1            | L10K_HUMAN           |
| Q9UNZ5                                                                                             | 2             | 3.1234           | R.KKIEHDVVMK.A                   | 2            | L10K_HUMAN           |

| <i>Accession No*</i>                                                                            | <i>Charge</i> | <i>XC(Max)**</i> | <i>Peptide*</i>                  | <i>TC***</i> | <i>Reference No*</i> |
|-------------------------------------------------------------------------------------------------|---------------|------------------|----------------------------------|--------------|----------------------|
| Q9UNZ5                                                                                          | 2             | 3.8548           | R.KKIEHDVVM#K.A                  | 2            | L10K_HUMAN           |
| Q9UNZ5                                                                                          | 2             | 3.4132           | K.KIEHDVVMK.A                    | 3            | L10K_HUMAN           |
| Q9UNZ5                                                                                          | 2             | 3.1518           | K.KIEHDVVM#K.A                   | 2            | L10K_HUMAN           |
| Q9UNZ5                                                                                          | 1             | 2.4897           | K.NLEVGIR.K                      | 1            | L10K_HUMAN           |
| <b><i>Ligand-dependent corepressor - Homo sapiens (Human)</i></b>                               |               |                  |                                  |              |                      |
| Q96JN0                                                                                          | 2             | 3.5316           | K.NSSTQDPSQPNSTK.N               | 1            | LCOR_HUMAN           |
| <b><i>Ligand-dependent nuclear receptor corepressor-like protein - Homo sapiens (Human)</i></b> |               |                  |                                  |              |                      |
| Q8N3X6                                                                                          | 2             | 3.2637           | R.ERMAAAAAAAAAAAAAAQCRRSPR.C     | 1            | Q8N3X6_HUMA          |
| <b><i>LIM and calponin homology domains-containing protein 1 - Homo sapiens (Human)</i></b>     |               |                  |                                  |              |                      |
| Q9UPQ0                                                                                          | 2             | 3.322            | R.ASVLDTSMSAGSGSPSK.T            | 2            | LIMC1_HUMAN          |
| <b><i>LIM and cysteine-rich domains protein 1 - Homo sapiens (Human)</i></b>                    |               |                  |                                  |              |                      |
| Q9NZU5                                                                                          | 2             | 3.0394           | K.MSLGQLQSAR.G                   | 1            | LMCD1_HUMAN          |
| <b><i>LIM and SH3 domain protein 1 - Homo sapiens (Human)</i></b>                               |               |                  |                                  |              |                      |
| Q14847                                                                                          | 1             | 2.3172           | K.MTLNMK.N                       | 2            | LASP1_HUMAN          |
| Q14847                                                                                          | 2             | 3.8803           | R.YKEEFEKNK.G                    | 6            | LASP1_HUMAN          |
| Q14847                                                                                          | 1             | 3.0587           | R.YKEEFEK.N                      | 4            | LASP1_HUMAN          |
| Q14847                                                                                          | 4             | 6.6878           | R.RPLEQQQPHHIPTSAPVYQQPQQQPVAQSY | 2            | LASP1_HUMAN          |
| Q14847                                                                                          | 2             | 4.7941           | R.LKQQSELQSQVR.Y                 | 8            | LASP1_HUMAN          |
| Q14847                                                                                          | 3             | 4.2319           | K.TQDQISNIKYHEEFKSR.M            | 2            | LASP1_HUMAN          |
| Q14847                                                                                          | 2             | 5.5397           | K.TQDQISNIKYHEEFK.S              | 5            | LASP1_HUMAN          |
| Q14847                                                                                          | 2             | 3.3927           | K.TQDQISNIK.Y                    | 5            | LASP1_HUMAN          |
| Q14847                                                                                          | 2             | 4.5237           | K.QSFTMVAADTPENLR.L              | 10           | LASP1_HUMAN          |
| Q14847                                                                                          | 2             | 2.8704           | K.QQSELQSQVR.Y                   | 2            | LASP1_HUMAN          |
| Q14847                                                                                          | 2             | 5.4791           | K.KTQDQISNIKYHEEFK.S             | 1            | LASP1_HUMAN          |
| Q14847                                                                                          | 2             | 4.1612           | K.KTQDQISNIK.Y                   | 4            | LASP1_HUMAN          |
| Q14847                                                                                          | 3             | 5.2813           | K.GKGFVSVVADTPELQR.I             | 8            | LASP1_HUMAN          |
| Q14847                                                                                          | 2             | 4.6219           | K.GFSVVADTPELQR.I                | 15           | LASP1_HUMAN          |
| Q14847                                                                                          | 2             | 3.931            | K.QSFTM#VADTPENLR.L              | 8            | LASP1_HUMAN          |
| <b><i>LIM domain and actin-binding protein 1 - Homo sapiens (Human)</i></b>                     |               |                  |                                  |              |                      |
| Q9UHB6                                                                                          | 2             | 3.6948           | R.STPAEDDSRDSQVK.S               | 4            | LIMA1_HUMAN          |
| <b><i>LIM domain only protein 7 - Homo sapiens (Human)</i></b>                                  |               |                  |                                  |              |                      |
| Q8WWI1                                                                                          | 2             | 3.5131           | R.NPSSVPPPSAGSVK.T               | 4            | LMO7_HUMAN           |
| Q8WWI1                                                                                          | 2             | 2.8861           | K.EQVPSGAELER.Q                  | 1            | LMO7_HUMAN           |
| Q8WWI1                                                                                          | 2             | 5.1136           | K.TSTGTGVAATQSPTR.S              | 3            | LMO7_HUMAN           |
| <b><i>LIM domain-containing protein 1 - Homo sapiens (Human)</i></b>                            |               |                  |                                  |              |                      |

| <i>Accession No*</i>                                                                             | <i>Charge</i> | <i>XC(Max)**</i> | <i>Peptide*</i>                  | <i>TC***</i> | <i>Reference No*</i> |
|--------------------------------------------------------------------------------------------------|---------------|------------------|----------------------------------|--------------|----------------------|
| Q9UGP4                                                                                           | 2             | 4.079            | R.SSEGLGQNSGIGGR.S               | 2            | LIMD1_HUMAN          |
| Q9UGP4                                                                                           | 1             | 2.2459           | R.WEVVGSK.L                      | 2            | LIMD1_HUMAN          |
| <b><i>LIM-nebulette - Homo sapiens (Human)</i></b>                                               |               |                  |                                  |              |                      |
| Q70I54                                                                                           | 2             | 3.8093           | K.QSFTTVADTPENLR.L               | 1            | Q70I54_HUMAN         |
| Q70I54                                                                                           | 1             | 2.356            | R.DFEESK.G                       | 3            | Q70I54_HUMAN         |
| Q70I54                                                                                           | 2             | 4.3051           | R.LKQQSELQSQVK.Y                 | 7            | Q70I54_HUMAN         |
| Q70I54                                                                                           | 2             | 3.2182           | R.TQEIQISNVK.Y                   | 2            | Q70I54_HUMAN         |
| <b><i>Lin-7 homolog C - Homo sapiens (Human)</i></b>                                             |               |                  |                                  |              |                      |
| Q9NUP9                                                                                           | 2             | 3.3781           | R.VLQSEFCNAVR.E                  | 2            | LIN7C_HUMAN          |
| <b><i>Lipin-2 - Homo sapiens (Human)</i></b>                                                     |               |                  |                                  |              |                      |
| Q92539                                                                                           | 4             | 4.9924           | R.SQHQPDDIYLLDKGLEPEVAALYFPK.S   | 1            | LPIN2_HUMAN          |
| Q92539                                                                                           | 3             | 4.7667           | K.SGGDETSPQSSDISHVLETETIFTSSVK.K | 2            | LPIN2_HUMAN          |
| <b><i>Lipolysis-stimulated lipoprotein receptor - Homo sapiens (Human)</i></b>                   |               |                  |                                  |              |                      |
| Q86X29                                                                                           | 2             | 4.9605           | R.SSSAGGQGSYVPLLR.D              | 4            | LSR_HUMAN            |
| Q86X29                                                                                           | 2             | 3.2526           | R.IQASQQDDSM#R.V                 | 2            | LSR_HUMAN            |
| Q86X29                                                                                           | 2             | 3.8202           | R.IQASQQDDSMR.V                  | 2            | LSR_HUMAN            |
| <b><i>Lipoma-preferred partner - Homo sapiens (Human)</i></b>                                    |               |                  |                                  |              |                      |
| Q93052                                                                                           | 2             | 3.5829           | R.M#VIPNQPLTATK.K                | 3            | LPP_HUMAN            |
| Q93052                                                                                           | 2             | 4.7517           | R.YYEGYYAAGPGYGGR.N              | 6            | LPP_HUMAN            |
| Q93052                                                                                           | 2             | 2.9678           | R.NSDSPTYGQQGHPNTWK.R            | 2            | LPP_HUMAN            |
| Q93052                                                                                           | 2             | 3.6518           | R.MVIPNQPLTATK.K                 | 2            | LPP_HUMAN            |
| Q93052                                                                                           | 3             | 6.1953           | R.METTHSFGNPSISVSTQQPPK.F        | 7            | LPP_HUMAN            |
| Q93052                                                                                           | 2             | 2.721            | K.KFAPVVAPK.P                    | 1            | LPP_HUMAN            |
| Q93052                                                                                           | 3             | 5.7819           | R.METTHSFGNPSISVSTQQPPK.K        | 5            | LPP_HUMAN            |
| Q93052                                                                                           | 2             | 2.9135           | R.M#VIPNQPLTATK.K.S              | 2            | LPP_HUMAN            |
| Q93052                                                                                           | 3             | 3.824            | R.M#ETTHSFGNPSISVSTQQPPK.K       | 1            | LPP_HUMAN            |
| Q93052                                                                                           | 2             | 3.5948           | K.STGEPLGHVPAR.M                 | 2            | LPP_HUMAN            |
| Q93052                                                                                           | 3             | 5.0937           | K.REPGYTTPGAGNQNPMPYVTPGPK.K     | 2            | LPP_HUMAN            |
| Q93052                                                                                           | 3             | 4.2269           | K.KFAPVVAPKPK.Y                  | 4            | LPP_HUMAN            |
| Q93052                                                                                           | 2             | 2.9126           | K.MLYDM#ENPPADEYFGR.C            | 2            | LPP_HUMAN            |
| Q93052                                                                                           | 3             | 4.866            | K.GGHSGQLGPSSVAPFRPEDELEHLTKK.M  | 2            | LPP_HUMAN            |
| Q93052                                                                                           | 2             | 2.8064           | K.FAPVVAPKPK.Y                   | 1            | LPP_HUMAN            |
| Q93052                                                                                           | 3             | 5.2134           | R.M#ETTHSFGNPSISVSTQQPPK.F       | 4            | LPP_HUMAN            |
| <b><i>Lipopolysaccharide-responsive and beige-like anchor protein - Homo sapiens (Human)</i></b> |               |                  |                                  |              |                      |
| P50851                                                                                           | 2             | 5.6011           | R.DINVSQSQPDTK.D                 | 4            | LRBA_HUMAN           |

| <i>Accession No*</i>                                                 | <i>Charge</i> | <i>XC(Max)**</i> | <i>Peptide*</i>            | <i>TC***</i> | <i>Reference No*</i> |
|----------------------------------------------------------------------|---------------|------------------|----------------------------|--------------|----------------------|
| <b><i>Liprin-alpha-1 - Homo sapiens (Human)</i></b>                  |               |                  |                            |              |                      |
| Q13136                                                               | 2             | 3.2878           | K.VQTLNEQDWER.A            | 2            | LIPA1_HUMAN          |
| Q13136                                                               | 2             | 2.8955           | R.VTSSM#SSPSM#QPK.K        | 2            | LIPA1_HUMAN          |
| Q13136                                                               | 2             | 3.6974           | R.LLDTLRETQETLALTQGK.L     | 1            | LIPA1_HUMAN          |
| Q13136                                                               | 3             | 4.1149           | R.LIQEEKENTEQRAEEIESR.V    | 1            | LIPA1_HUMAN          |
| Q13136                                                               | 2             | 5.1968           | R.GLAAGSAETLPANFR.V        | 6            | LIPA1_HUMAN          |
| Q13136                                                               | 3             | 4.4582           | R.LAALRDEPSKVQTLNEQDWER.A  | 1            | LIPA1_HUMAN          |
| <b><i>Liprin-beta-1 - Homo sapiens (Human)</i></b>                   |               |                  |                            |              |                      |
| Q86W92                                                               | 2             | 5.35             | R.GLLEMMETDEKEGLR.C        | 6            | LIPB1_HUMAN          |
| Q86W92                                                               | 3             | 5.047            | R.TSLETQKLDLMAEISNLK.L     | 2            | LIPB1_HUMAN          |
| Q86W92                                                               | 3             | 5.0768           | R.TSLETQKLDLM#AEISNLK.L    | 3            | LIPB1_HUMAN          |
| Q86W92                                                               | 3             | 5.5299           | R.LYEEDDLDRLEQMEDSEGTVR.Q  | 2            | LIPB1_HUMAN          |
| Q86W92                                                               | 2             | 3.1483           | K.ETSDGEKETIQK.T           | 1            | LIPB1_HUMAN          |
| Q86W92                                                               | 3             | 5.0027           | R.LYEEDDLDRLEQM#EDSEGTVR.Q | 1            | LIPB1_HUMAN          |
| Q86W92                                                               | 2             | 3.6799           | R.DTEGLIQEINDLR.L          | 2            | LIPB1_HUMAN          |
| Q86W92                                                               | 2             | 2.7599           | K.SSSLGNLKK.E              | 1            | LIPB1_HUMAN          |
| Q86W92                                                               | 3             | 5.7309           | K.KAVESLMAANEEKDR.K        | 2            | LIPB1_HUMAN          |
| Q86W92                                                               | 3             | 4.3641           | K.AVESLMAANEEKDR.K         | 4            | LIPB1_HUMAN          |
| Q86W92                                                               | 2             | 3.4182           | K.MQDVTVLAQGK.D            | 2            | LIPB1_HUMAN          |
| <b><i>Liprin-beta-2 - Homo sapiens (Human)</i></b>                   |               |                  |                            |              |                      |
| Q8ND30                                                               | 2             | 3.4389           | K.SPPTICQPDATGSSLLR.L      | 1            | LIPB2_HUMAN          |
| Q8ND30                                                               | 2             | 2.8763           | R.RIEELTGLLNQYR.K          | 1            | LIPB2_HUMAN          |
| Q8ND30                                                               | 3             | 4.0914           | R.RIEELTGLLNQYRK.V         | 1            | LIPB2_HUMAN          |
| <b><i>L-lactate dehydrogenase A chain - Homo sapiens (Human)</i></b> |               |                  |                            |              |                      |
| P00338                                                               | 2             | 2.8814           | K.DYNVTANSK.L              | 1            | LDHA_HUMAN           |
| P00338                                                               | 2             | 4.1632           | K.SADTLWGIQK.E             | 6            | LDHA_HUMAN           |
| P00338                                                               | 2             | 3.6613           | K.VTLTSEEEAR.L             | 4            | LDHA_HUMAN           |
| <b><i>L-lactate dehydrogenase B chain - Homo sapiens (Human)</i></b> |               |                  |                            |              |                      |
| P07195                                                               | 2             | 3.7406           | K.LIAPVAEEEEATVPNNK.I      | 2            | LDHB_HUMAN           |
| P07195                                                               | 2             | 3.3674           | K.SADTLWDIQK.D             | 4            | LDHB_HUMAN           |
| <b><i>LOC387763 protein - Homo sapiens (Human)</i></b>               |               |                  |                            |              |                      |
| Q7Z7L8                                                               | 2             | 3.5463           | K.LRNSLDSSSDSAL.-          | 2            | Q7Z7L8_HUMAN         |
| Q7Z7L8                                                               | 1             | 3.1928           | R.STQSLSLQR.E              | 5            | Q7Z7L8_HUMAN         |
| Q7Z7L8                                                               | 2             | 3.868            | R.RSTQSLSLQR.E             | 3            | Q7Z7L8_HUMAN         |
| <b><i>LOC649305 protein - Homo sapiens (Human)</i></b>               |               |                  |                            |              |                      |

| <i>Accession No*</i>                                                                              | <i>Charge</i> | <i>XC(Max)**</i> | <i>Peptide*</i>                 | <i>TC***</i> | <i>Reference No*</i> |
|---------------------------------------------------------------------------------------------------|---------------|------------------|---------------------------------|--------------|----------------------|
| Q4G118                                                                                            | 2             | 2.7326           | R.QVATAEERSGSHM.-               | 1            | Q4G118_HUMA          |
| <b><i>Low-density lipoprotein receptor-related protein 2 precursor - Homo sapiens (Human)</i></b> |               |                  |                                 |              |                      |
| P98164                                                                                            | 2             | 2.89             | K.QPIIFENPM#YSAR.D              | 1            | LRP2_HUMAN           |
| P98164                                                                                            | 2             | 3.1737           | R.DPTPTYSAT EDTFK.D             | 3            | LRP2_HUMAN           |
| P98164                                                                                            | 2             | 3.3027           | R.TVVQYLNNPR.S                  | 2            | LRP2_HUMAN           |
| <b><i>LRRFIP1 protein - Homo sapiens (Human)</i></b>                                              |               |                  |                                 |              |                      |
| Q9BSL6                                                                                            | 3             | 5.1344           | R.SALDKTEELEVSNGLVK.R           | 3            | Q9BSL6_HUMA          |
| Q9BSL6                                                                                            | 3             | 4.2314           | K.SAAENAEKIEDELKAEK.R           | 2            | Q9BSL6_HUMA          |
| <b><i>L-selectin precursor - Homo sapiens (Human)</i></b>                                         |               |                  |                                 |              |                      |
| Q9UJ43                                                                                            | 2             | 2.8175           | K.SLTEEAENWGDGEPNNKK.N          | 1            | Q9UJ43_HUMAN         |
| <b><i>LSM14 protein homolog A - Homo sapiens (Human)</i></b>                                      |               |                  |                                 |              |                      |
| Q8ND56                                                                                            | 2             | 3.183            | K.SFFDNISCCDDNR.E               | 2            | LS14A_HUMAN          |
| Q8ND56                                                                                            | 2             | 3.1705           | K.VSRPENEQLR.N                  | 2            | LS14A_HUMAN          |
| Q8ND56                                                                                            | 3             | 5.3811           | K.DFDFESANAQFNKEEIDREFHNK.L     | 1            | LS14A_HUMAN          |
| <b><i>Lumican precursor - Homo sapiens (Human)</i></b>                                            |               |                  |                                 |              |                      |
| P51884                                                                                            | 1             | 3.3595           | R.FNALQYLR.L                    | 6            | LUM_HUMAN            |
| P51884                                                                                            | 4             | 5.4073           | R.LPSGLPVSLTLYLDNNKISNIPDEYFK.R | 2            | LUM_HUMAN            |
| P51884                                                                                            | 2             | 5.4336           | R.LPSGLPVSLTLYLDNNK.I           | 3            | LUM_HUMAN            |
| P51884                                                                                            | 2             | 3.5169           | R.NNQIDHIDEK.A                  | 2            | LUM_HUMAN            |
| P51884                                                                                            | 2             | 3.3789           | R.ISETSLPPDMECLR.V              | 2            | LUM_HUMAN            |
| P51884                                                                                            | 2             | 4.2406           | K.SLEDLQLTHNK.I                 | 5            | LUM_HUMAN            |
| P51884                                                                                            | 2             | 3.3774           | K.RFNALQYLR.L                   | 2            | LUM_HUMAN            |
| P51884                                                                                            | 2             | 2.8855           | K.ISNIPDEYFKR.F                 | 1            | LUM_HUMAN            |
| P51884                                                                                            | 1             | 2.4816           | K.ILGPLSYSK.I                   | 1            | LUM_HUMAN            |
| P51884                                                                                            | 2             | 3.7736           | K.SLEDLQLTHNKITK.L              | 1            | LUM_HUMAN            |
| P51884                                                                                            | 2             | 3.8163           | R.LKEDAVSAAFK.G                 | 5            | LUM_HUMAN            |
| <b><i>Lupus La protein - Homo sapiens (Human)</i></b>                                             |               |                  |                                 |              |                      |
| P05455                                                                                            | 2             | 3.0962           | K.GKVQFQGKK.T                   | 2            | LA_HUMAN             |
| P05455                                                                                            | 2             | 4.6916           | R.LTTDFNVIVEALSK.S              | 4            | LA_HUMAN             |
| P05455                                                                                            | 2             | 2.797            | R.EETDKEEPASK.Q                 | 1            | LA_HUMAN             |
| P05455                                                                                            | 3             | 4.7174           | R.AREETDKEEPASK.Q               | 18           | LA_HUMAN             |
| P05455                                                                                            | 1             | 2.52             | K.VQFQGK.K                      | 3            | LA_HUMAN             |
| P05455                                                                                            | 2             | 4.4406           | K.IIEDQQESLNK.W                 | 4            | LA_HUMAN             |
| P05455                                                                                            | 2             | 2.9117           | K.DANNGNLQLR.N                  | 1            | LA_HUMAN             |
| P05455                                                                                            | 2             | 4.2746           | K.AKDANNGNLQLR.N                | 2            | LA_HUMAN             |

| <i>Accession No*</i>                                                                                     | <i>Charge</i> | <i>XC(Max)**</i> | <i>Peptide*</i>                   | <i>TC***</i> | <i>Reference No*</i> |
|----------------------------------------------------------------------------------------------------------|---------------|------------------|-----------------------------------|--------------|----------------------|
| P05455                                                                                                   | 2             | 3.4774           | K.IIEDQQESLNKWK.S                 | 2            | LA_HUMAN             |
| <b><i>Lutheran blood group glycoprotein precursor - Homo sapiens (Human)</i></b>                         |               |                  |                                   |              |                      |
| P50895                                                                                                   | 2             | 3.0859           | R.LEVPVEM#NPEGYM#TSR.T            | 1            | LU_HUMAN             |
| P50895                                                                                                   | 2             | 2.8832           | R.VAYLDPLELSE GK.V                | 1            | LU_HUMAN             |
| P50895                                                                                                   | 2             | 3.9223           | R.SPPYQLDSQGR.L                   | 4            | LU_HUMAN             |
| P50895                                                                                                   | 2             | 3.3463           | R.LEVPVEM#NPEGYM#TSR.T            | 1            | LU_HUMAN             |
| P50895                                                                                                   | 2             | 3.8572           | R.GRSPPYQLDSQGR.L                 | 1            | LU_HUMAN             |
| P50895                                                                                                   | 2             | 2.7725           | R.GDGSPSPEYTLFR.L                 | 2            | LU_HUMAN             |
| P50895                                                                                                   | 2             | 3.8716           | R.AGAAGTAATAR.L                   | 5            | LU_HUMAN             |
| P50895                                                                                                   | 1             | 2.2347           | K.VTSALSR.D                       | 1            | LU_HUMAN             |
| P50895                                                                                                   | 2             | 3.1525           | R.LASAEMQGSELQVTMHDTR.G           | 1            | LU_HUMAN             |
| <b><i>Lymphocyte cytosolic protein 2 - Homo sapiens (Human)</i></b>                                      |               |                  |                                   |              |                      |
| Q13094                                                                                                   | 2             | 3.4354           | R.SLAPFDREPFTLGK.K                | 2            | LCP2_HUMAN           |
| Q13094                                                                                                   | 2             | 2.9028           | K.LSQEINKNEER.R                   | 1            | LCP2_HUMAN           |
| Q13094                                                                                                   | 2             | 2.7832           | R.SLGEHLPK.I                      | 1            | LCP2_HUMAN           |
| Q13094                                                                                                   | 2             | 2.7293           | R.SEVLGWDPDSLADYFKK.L             | 1            | LCP2_HUMAN           |
| Q13094                                                                                                   | 2             | 4.8108           | R.FLNLTENDIQKFPK.L                | 2            | LCP2_HUMAN           |
| Q13094                                                                                                   | 2             | 2.9947           | K.LSQEINKNEERR.S                  | 2            | LCP2_HUMAN           |
| <b><i>Lymphocyte-specific protein 1 - Homo sapiens (Human)</i></b>                                       |               |                  |                                   |              |                      |
| P33241                                                                                                   | 4             | 7.3761           | R.SPEGEQEDRPLGHAYEKEDSDEVHLEELSLS | 5            | LSP1_HUMAN           |
| P33241                                                                                                   | 2             | 3.0714           | K.FVATGHGKYEK.V                   | 2            | LSP1_HUMAN           |
| P33241                                                                                                   | 2             | 4.6566           | K.IDQWLEQYTQAIETAGR.T             | 9            | LSP1_HUMAN           |
| P33241                                                                                                   | 2             | 3.2381           | K.KSQPDLPI SK.I                   | 4            | LSP1_HUMAN           |
| P33241                                                                                                   | 2             | 3.0158           | K.LIDRTESLNR.S                    | 5            | LSP1_HUMAN           |
| P33241                                                                                                   | 3             | 3.8826           | K.QEMLLSLKPSEAPELDEDEGFGDWSQRPEQ  | 1            | LSP1_HUMAN           |
| P33241                                                                                                   | 1             | 2.2219           | K.SQPDLPI SK.I                    | 1            | LSP1_HUMAN           |
| P33241                                                                                                   | 3             | 4.1344           | R.QQHEGAQGALDSGEPQCR.S            | 2            | LSP1_HUMAN           |
| P33241                                                                                                   | 3             | 5.3057           | K.EGPGPEDTVQDNLGAAGAEQQEEHQK.C    | 6            | LSP1_HUMAN           |
| <b><i>LysM and putative peptidoglycan-binding domain-containing protein 2 - Homo sapiens (Human)</i></b> |               |                  |                                   |              |                      |
| Q8IV50                                                                                                   | 1             | 2.15             | R.SYGSTASVR.A                     | 1            | LYSM2_HUMAN          |
| Q8IV50                                                                                                   | 2             | 3.5741           | R.APLGAGVIER.H                    | 4            | LYSM2_HUMAN          |
| <b><i>Lysosomal alpha-glucosidase precursor - Homo sapiens (Human)</i></b>                               |               |                  |                                   |              |                      |
| P10253                                                                                                   | 2             | 3.2006           | R.AGYIIPLQGPGLTTTESR.Q            | 1            | LYAG_HUMAN           |
| <b><i>Lysosomal alpha-mannosidase precursor - Homo sapiens (Human)</i></b>                               |               |                  |                                   |              |                      |
| O00754                                                                                                   | 2             | 2.8364           | R.GVSEPLMENGSGAWVR.G              | 1            | MA2B1_HUMAN          |



| <i>Accession No*</i>                                                                | <i>Charge</i> | <i>XC(Max)**</i> | <i>Peptide*</i>        | <i>TC***</i> | <i>Reference No*</i> |
|-------------------------------------------------------------------------------------|---------------|------------------|------------------------|--------------|----------------------|
| O00754                                                                              | 2             | 2.957            | R.IYITDGNMQLTVLTDR.S   | 1            | MA2B1_HUMAN          |
| <b><i>Lysosomal-associated membrane protein 1 - Homo sapiens (Human)</i></b>        |               |                  |                        |              |                      |
| Q8WU33                                                                              | 2             | 3.2043           | R.ALQATVGNSYK.C        | 2            | Q8WU33_HUMA          |
| <b><i>Lysozyme C precursor - Homo sapiens (Human)</i></b>                           |               |                  |                        |              |                      |
| P61626                                                                              | 1             | 2.1056           | R.QYVQGC GV.-          | 1            | LYSC_HUMAN           |
| P61626                                                                              | 2             | 4.5298           | R.STDYGIFQINSR.Y       | 5            | LYSC_HUMAN           |
| <b><i>Macrophage migration inhibitory factor - Homo sapiens (Human)</i></b>         |               |                  |                        |              |                      |
| P14174                                                                              | 2             | 3.6327           | -.MPMFIVNTNVPR.A       | 2            | MIF_HUMAN            |
| <b><i>MAGUK p55 subfamily member 5 - Homo sapiens (Human)</i></b>                   |               |                  |                        |              |                      |
| Q8N3R9                                                                              | 2             | 3.6893           | K.ILEIEDLFSSLK.H       | 2            | MPP5_HUMAN           |
| <b><i>MAK16-like protein RBM13 - Homo sapiens (Human)</i></b>                       |               |                  |                        |              |                      |
| Q9BXY0                                                                              | 3             | 4.7853           | K.ALIAAQLDNAIEKELLER.L | 2            | RBM13_HUMAN          |
| <b><i>Malate dehydrogenase, cytoplasmic - Homo sapiens (Human)</i></b>              |               |                  |                        |              |                      |
| P40925                                                                              | 2             | 2.9457           | K.FVEGLPINDFSR.E       | 1            | MDHC_HUMAN           |
| <b><i>Malate dehydrogenase, mitochondrial precursor - Homo sapiens (Human)</i></b>  |               |                  |                        |              |                      |
| P40926                                                                              | 2             | 2.8393           | K.KGEDFVK.T            | 1            | MDHM_HUMAN           |
| <b><i>Male-enhanced antigen 1 - Homo sapiens (Human)</i></b>                        |               |                  |                        |              |                      |
| Q16626                                                                              | 2             | 3.5869           | R.EISDAQWEDVVQK.A      | 2            | MEA1_HUMAN           |
| Q16626                                                                              | 2             | 4.1318           | R.TM#AGVSLPAPGVPAWAR.E | 1            | MEA1_HUMAN           |
| Q16626                                                                              | 2             | 3.7213           | R.TMAGVSLPAPGVPAWAR.E  | 3            | MEA1_HUMAN           |
| <b><i>Mannose-6-phosphate receptor-binding protein 1 - Homo sapiens (Human)</i></b> |               |                  |                        |              |                      |
| O60664                                                                              | 2             | 3.1997           | K.SVVTGGVQSV M#GSR.L   | 1            | M6PBP_HUMAN          |
| O60664                                                                              | 3             | 3.845            | R.GLDKLEENLPILQQPTEK.V | 1            | M6PBP_HUMAN          |
| O60664                                                                              | 2             | 3.2651           | R.GAVQSGVDKTK.S        | 4            | M6PBP_HUMAN          |
| O60664                                                                              | 3             | 5.7882           | R.TLTAAAVSGAQPI LSK.L  | 7            | M6PBP_HUMAN          |
| O60664                                                                              | 2             | 2.7873           | R.GAVQSGVDK.T          | 2            | M6PBP_HUMAN          |
| O60664                                                                              | 2             | 4.5451           | K.SVVTGGVQSV MGSR.L    | 2            | M6PBP_HUMAN          |
| O60664                                                                              | 2             | 3.5502           | K.LEPQIASASEY AHR.G    | 2            | M6PBP_HUMAN          |
| O60664                                                                              | 2             | 3.2621           | K.DTVATQLSEAVDATR.G    | 1            | M6PBP_HUMAN          |
| O60664                                                                              | 2             | 4.5508           | K.VSGAQEMVSSAK.D       | 3            | M6PBP_HUMAN          |
| O60664                                                                              | 2             | 3.8416           | K.VLADTKELVSSK.V       | 1            | M6PBP_HUMAN          |
| <b><i>Mannosyl-oligosaccharide glucosidase - Homo sapiens (Human)</i></b>           |               |                  |                        |              |                      |
| Q13724                                                                              | 2             | 2.8714           | R.RAVPAEGVR.T          | 1            | GCS1_HUMAN           |
| <b><i>MAP kinase-activating death domain protein - Homo sapiens (Human)</i></b>     |               |                  |                        |              |                      |
| Q8WXG6                                                                              | 2             | 3.427            | R.LASDSAESDSR.A        | 4            | MADD_HUMAN           |

| <i>Accession No*</i>                                                                        | <i>Charge</i> | <i>XC(Max)**</i> | <i>Peptide*</i>                   | <i>TC***</i> | <i>Reference No*</i> |
|---------------------------------------------------------------------------------------------|---------------|------------------|-----------------------------------|--------------|----------------------|
| <b><i>MARCKS-related protein - Homo sapiens (Human)</i></b>                                 |               |                  |                                   |              |                      |
| P49006                                                                                      | 2             | 3.655            | K.AAATPESQEPQAK.G                 | 5            | MRP_HUMAN            |
| P49006                                                                                      | 3             | 7.0992           | R.KEGGGDSSASSPTEEEQEQQEIGACSDEGT  | 1            | MRP_HUMAN            |
| <b><i>Matrin-3 - Homo sapiens (Human)</i></b>                                               |               |                  |                                   |              |                      |
| P43243                                                                                      | 3             | 4.4436           | K.TDGSQKTESSTEGKEQEEK.S           | 1            | MATR3_HUMAN          |
| P43243                                                                                      | 2             | 2.9068           | R.TEEGPTLSYGR.D                   | 2            | MATR3_HUMAN          |
| P43243                                                                                      | 3             | 6.4348           | R.DLSAAGIGLLAAATQSLMPASLGR.M      | 1            | MATR3_HUMAN          |
| P43243                                                                                      | 3             | 4.3036           | R.DLDELSRYPEDKITPENLPQILLQLK.R    | 1            | MATR3_HUMAN          |
| P43243                                                                                      | 3             | 6.3238           | R.DLSAAGIGLLAAATQSLSM#PASLGR.M    | 2            | MATR3_HUMAN          |
| <b><i>Matrix Gla protein precursor - Homo sapiens (Human)</i></b>                           |               |                  |                                   |              |                      |
| P08493                                                                                      | 2             | 4.2368           | R.NANTFISPQQR.W                   | 4            | MGP_HUMAN            |
| P08493                                                                                      | 2             | 3.629            | R.YAMVYGYNAAYNR.Y                 | 2            | MGP_HUMAN            |
| <b><i>Matrix-remodeling-associated protein 5 precursor - Homo sapiens (Human)</i></b>       |               |                  |                                   |              |                      |
| Q9NR99                                                                                      | 2             | 3.0556           | R.VHASHQLTR.V                     | 1            | MXRA5_HUMAN          |
| Q9NR99                                                                                      | 3             | 4.4517           | K.HSEKEPETNVAEGR.R                | 1            | MXRA5_HUMAN          |
| Q9NR99                                                                                      | 2             | 3.0135           | K.SSLSTQDTLLIK.K                  | 2            | MXRA5_HUMAN          |
| <b><i>Matrix-remodeling-associated protein 7 - Homo sapiens (Human)</i></b>                 |               |                  |                                   |              |                      |
| P84157                                                                                      | 2             | 2.8437           | R.RGAAASPEPAR.A                   | 1            | MXRA7_HUMAN          |
| P84157                                                                                      | 3             | 5.2398           | R.QEEEEQLDGEKGPSSEGPEEEDGEGFSFK.Y | 4            | MXRA7_HUMAN          |
| P84157                                                                                      | 3             | 5.2263           | K.DNKETFGEMSDGDVQEQLR.L           | 1            | MXRA7_HUMAN          |
| P84157                                                                                      | 2             | 3.1216           | R.GAAASPEPAR.A                    | 1            | MXRA7_HUMAN          |
| <b><i>Matrix-remodelling associated protein 7 - Homo sapiens (Human)</i></b>                |               |                  |                                   |              |                      |
| Q6ZR64                                                                                      | 2             | 4.3176           | K.EELEEEQRTEE.-                   | 4            | Q6ZR64_HUMA          |
| Q6ZR64                                                                                      | 2             | 4.078            | K.MMTKEELEEEQRTEE.-               | 1            | Q6ZR64_HUMA          |
| <b><i>Max-binding protein MNT - Homo sapiens (Human)</i></b>                                |               |                  |                                   |              |                      |
| Q99583                                                                                      | 2             | 3.9168           | R.FLEWQAQQQR.A                    | 2            | MNT_HUMAN            |
| <b><i>Mediator of DNA damage checkpoint protein 1 - Homo sapiens (Human)</i></b>            |               |                  |                                   |              |                      |
| Q14676                                                                                      | 3             | 4.7293           | R.DTQRGEPEGGSQDQK.G               | 1            | MDC1_HUMAN           |
| <b><i>Mediator of RNA polymerase II transcription subunit 28 - Homo sapiens (Human)</i></b> |               |                  |                                   |              |                      |
| Q9H204                                                                                      | 2             | 3.0671           | K.EDVSELRNELQR.K                  | 1            | MED28_HUMAN          |
| <b><i>Melanoma antigen family B, 16 - Homo sapiens (Human)</i></b>                          |               |                  |                                   |              |                      |
| A2A368                                                                                      | 1             | 2.1191           | K.EAPAAK.A                        | 2            | A2A368_HUMAN         |
| <b><i>Melanoma inhibitory activity protein 3 precursor - Homo sapiens (Human)</i></b>       |               |                  |                                   |              |                      |
| Q5JRA6                                                                                      | 3             | 6.2215           | R.WSAEASGKPSPSDPGSGTATM#M#NSSSR.  | 2            | MIA3_HUMAN           |
| Q5JRA6                                                                                      | 2             | 4.6306           | R.TQTAISVVEEDLK.L                 | 3            | MIA3_HUMAN           |

| <i>Accession No*</i>                                                                       | <i>Charge</i> | <i>XC(Max)**</i> | <i>Peptide*</i>                 | <i>TC***</i> | <i>Reference No*</i> |
|--------------------------------------------------------------------------------------------|---------------|------------------|---------------------------------|--------------|----------------------|
| Q5JRA6                                                                                     | 2             | 3.9904           | R.SEFGSVDGPLPHPR.W              | 3            | MIA3_HUMAN           |
| Q5JRA6                                                                                     | 2             | 3.7663           | R.GWPEVWAGSVGR.T                | 3            | MIA3_HUMAN           |
| Q5JRA6                                                                                     | 1             | 2.2175           | R.DVAATASK.Q                    | 1            | MIA3_HUMAN           |
| Q5JRA6                                                                                     | 2             | 3.4829           | R.ASESQILSIAEK.M                | 2            | MIA3_HUMAN           |
| Q5JRA6                                                                                     | 2             | 3.1693           | K.KGDPVYVYK.L                   | 3            | MIA3_HUMAN           |
| Q5JRA6                                                                                     | 3             | 6.4837           | R.WSAEASGKPSDPSDPSGTATMMNSSSR.G | 2            | MIA3_HUMAN           |
| Q5JRA6                                                                                     | 3             | 4.4693           | K.YFNVHELEALLQEMSSK.L           | 1            | MIA3_HUMAN           |
| <b><i>Melanoma-associated antigen D2 - Homo sapiens (Human)</i></b>                        |               |                  |                                 |              |                      |
| Q9UNF1                                                                                     | 1             | 2.9861           | K.ALEVSEDVK.V                   | 4            | MAGD2_HUMAN          |
| Q9UNF1                                                                                     | 2             | 4.0449           | K.ATEVSKTPEAR.E                 | 5            | MAGD2_HUMAN          |
| <b><i>Melanoma-associated antigen G1 - Homo sapiens (Human)</i></b>                        |               |                  |                                 |              |                      |
| Q96MG7                                                                                     | 2             | 2.7408           | R.ARPQPSGPAPSS.-                | 1            | MAGG1_HUMAN          |
| Q96MG7                                                                                     | 2             | 3.8254           | R.DGFAEEAPSTR.G                 | 4            | MAGG1_HUMAN          |
| Q96MG7                                                                                     | 2             | 5.0407           | R.GPGGSQGSQGPSQGAR.R            | 2            | MAGG1_HUMAN          |
| <b><i>Membrane-associated progesterone receptor component 1 - Homo sapiens (Human)</i></b> |               |                  |                                 |              |                      |
| O00264                                                                                     | 3             | 5.4354           | K.LLKEGEEPTVYSDEEPPKDESAR.K     | 4            | PGRC1_HUMAN          |
| O00264                                                                                     | 2             | 3.0557           | R.GDQPAASGSDDDDEPPPLPR.L        | 1            | PGRC1_HUMAN          |
| O00264                                                                                     | 3             | 4.3205           | K.IVRGDQPAASGSDDDDEPPPLPR.L     | 1            | PGRC1_HUMAN          |
| O00264                                                                                     | 2             | 4.0647           | K.FYGPEGPYGVFAGR.D              | 4            | PGRC1_HUMAN          |
| O00264                                                                                     | 2             | 3.5332           | K.EGEEPTVYSDEEPPKDESAR.K        | 1            | PGRC1_HUMAN          |
| O00264                                                                                     | 2             | 4.8762           | R.KFYGPEGPYGVFAGR.D             | 9            | PGRC1_HUMAN          |
| <b><i>Membrane-associated progesterone receptor component 2 - Homo sapiens (Human)</i></b> |               |                  |                                 |              |                      |
| O15173                                                                                     | 2             | 3.881            | K.FYGPAGPYGIFAGR.D              | 1            | PGRC2_HUMAN          |
| <b><i>Mesoderm development candidate 2 - Homo sapiens (Human)</i></b>                      |               |                  |                                 |              |                      |
| Q14696                                                                                     | 3             | 4.3588           | K.DIRDYNDADM#AR.L               | 3            | MESD2_HUMAN          |
| Q14696                                                                                     | 3             | 3.9824           | K.DIRDYNDADMAR.L                | 4            | MESD2_HUMAN          |
| Q14696                                                                                     | 2             | 3.316            | R.DYNDADMAR.L                   | 4            | MESD2_HUMAN          |
| <b><i>Metal transporter CNNM3 - Homo sapiens (Human)</i></b>                               |               |                  |                                 |              |                      |
| Q8NE01                                                                                     | 3             | 3.8547           | K.TTTAAGSSHSRPGVPEGSPGRNPGV.-   | 2            | CNNM3_HUMAN          |
| <b><i>Metallothionein-3 - Homo sapiens (Human)</i></b>                                     |               |                  |                                 |              |                      |
| P25713                                                                                     | 2             | 3.3058           | K.GGEAAEAEAEK.C                 | 3            | MT3_HUMAN            |
| <b><i>Metastasis suppressor protein 1 - Homo sapiens (Human)</i></b>                       |               |                  |                                 |              |                      |
| O43312                                                                                     | 3             | 5.2185           | R.LSSVSSHDSGFISQDAFQSK.S        | 3            | MTSS1_HUMAN          |
| O43312                                                                                     | 2             | 2.9434           | R.SSNLAQQAPVR.L                 | 1            | MTSS1_HUMAN          |
| O43312                                                                                     | 2             | 2.8657           | R.DTPQGEDM#LNAIR.R              | 1            | MTSS1_HUMAN          |

| <i>Accession No*</i>                                                                    | <i>Charge</i> | <i>XC(Max)**</i> | <i>Peptide*</i>               | <i>TC***</i> | <i>Reference No*</i> |
|-----------------------------------------------------------------------------------------|---------------|------------------|-------------------------------|--------------|----------------------|
| <b><i>Methionine aminopeptidase 2 - Homo sapiens (Human)</i></b>                        |               |                  |                               |              |                      |
| P50579                                                                                  | 3             | 5.4377           | K.GPSAAGEQEPDKESGASVDEVAR.Q   | 1            | AMPM2_HUMAN          |
| P50579                                                                                  | 3             | 5.7172           | K.SKGPSAAGEQEPDKESGASVDEVAR.Q | 3            | AMPM2_HUMAN          |
| <b><i>Methionine-R-sulfoxide reductase B2 - Homo sapiens (Human)</i></b>                |               |                  |                               |              |                      |
| Q9Y3D2                                                                                  | 2             | 3.7663           | R.RLDTSLGSAR.T                | 2            | MSRB2_HUMAN          |
| <b><i>Methionyl-tRNA synthetase, cytoplasmic - Homo sapiens (Human)</i></b>             |               |                  |                               |              |                      |
| P56192                                                                                  | 2             | 3.7397           | K.ADKNEVAEEVAK.L              | 2            | SYMC_HUMAN           |
| P56192                                                                                  | 3             | 4.2474           | K.AQKADKNEVAEEVAK.L           | 2            | SYMC_HUMAN           |
| <b><i>Methylated-DNA--protein-cysteine methyltransferase - Homo sapiens (Human)</i></b> |               |                  |                               |              |                      |
| P16455                                                                                  | 2             | 3.3895           | K.GAGATSGSPPAGRN.-            | 2            | MGMT_HUMAN           |
| <b><i>Methyl-CpG-binding domain protein 2 - Homo sapiens (Human)</i></b>                |               |                  |                               |              |                      |
| Q9UBB5                                                                                  | 2             | 2.7867           | R.YLGNTVDLSSFDLR.T            | 1            | MBD2_HUMAN           |
| Q9UBB5                                                                                  | 3             | 5.1584           | R.KKLEELMADILSR.A             | 2            | MBD2_HUMAN           |
| <b><i>Methyl-CpG-binding domain protein 3 - Homo sapiens (Human)</i></b>                |               |                  |                               |              |                      |
| O95983                                                                                  | 3             | 5.6309           | K.RLEEALMADMLAHVEELAR.D       | 1            | MBD3_HUMAN           |
| <b><i>Methyl-CpG-binding protein 2 - Homo sapiens (Human)</i></b>                       |               |                  |                               |              |                      |
| P51608                                                                                  | 2             | 4.7611           | K.VGDTSLDPNDFDFTVTGR.G        | 8            | MECP2_HUMAN          |
| P51608                                                                                  | 2             | 3.774            | R.GPMYDDPTLPEGWTR.K           | 1            | MECP2_HUMAN          |
| P51608                                                                                  | 2             | 3.8939           | R.SVQETVLPICK.R               | 2            | MECP2_HUMAN          |
| P51608                                                                                  | 1             | 2.2354           | R.SVQETVLPICK.K               | 1            | MECP2_HUMAN          |
| P51608                                                                                  | 2             | 5.0626           | R.SAGKYDVYLINPQGK.A           | 4            | MECP2_HUMAN          |
| P51608                                                                                  | 3             | 4.0954           | R.KPGSVVAAAAAEAKK.K           | 1            | MECP2_HUMAN          |
| P51608                                                                                  | 2             | 4.9989           | R.KPGSVVAAAAAEAK.K            | 5            | MECP2_HUMAN          |
| P51608                                                                                  | 2             | 3.9627           | R.KAEDPQAIPK.K                | 4            | MECP2_HUMAN          |
| P51608                                                                                  | 2             | 4.5704           | R.GRKPGSVVAAAAAEAK.K          | 3            | MECP2_HUMAN          |
| P51608                                                                                  | 2             | 3.4158           | K.AATSEGVQVKR.V               | 2            | MECP2_HUMAN          |
| P51608                                                                                  | 3             | 3.9191           | R.DRGPM#YDDPTLPEGWTR.K        | 1            | MECP2_HUMAN          |
| P51608                                                                                  | 2             | 3.1627           | K.AATSEGVQVK.R                | 3            | MECP2_HUMAN          |
| P51608                                                                                  | 2             | 2.9458           | K.MPFQTSPGGK.A                | 2            | MECP2_HUMAN          |
| P51608                                                                                  | 2             | 3.8979           | K.EVVKPLLSTLGEK.S             | 4            | MECP2_HUMAN          |
| P51608                                                                                  | 2             | 4.2822           | K.AEGGGATTSTQVMVIK.R          | 5            | MECP2_HUMAN          |
| P51608                                                                                  | 2             | 3.6856           | K.AEGGGATTSTQVM#VIK.R         | 2            | MECP2_HUMAN          |
| P51608                                                                                  | 2             | 2.8172           | K.AEADPQAIPK.K                | 1            | MECP2_HUMAN          |
| P51608                                                                                  | 2             | 4.0459           | R.DRGPMYDDPTLPEGWTR.K         | 3            | MECP2_HUMAN          |
| <b><i>Methylosome subunit pICln - Homo sapiens (Human)</i></b>                          |               |                  |                               |              |                      |

| <i>Accession No*</i>                                                                                | <i>Charge</i> | <i>XC(Max)**</i> | <i>Peptide*</i>                   | <i>TC***</i> | <i>Reference No*</i> |
|-----------------------------------------------------------------------------------------------------|---------------|------------------|-----------------------------------|--------------|----------------------|
| P54105                                                                                              | 2             | 4.7773           | K.GLGTGTLYIAESR.L                 | 7            | ICLN_HUMAN           |
| <b><i>MGC11257 protein - Homo sapiens (Human)</i></b>                                               |               |                  |                                   |              |                      |
| Q9BRJ6                                                                                              | 3             | 4.7674           | K.GEAVLRPGLDAEPELSPEEQR.V         | 1            | Q9BRJ6_HUMA          |
| <b><i>Mi2-beta (Human)</i></b>                                                                      |               |                  |                                   |              |                      |
| Q14839                                                                                              | 2             | 2.9277           | R.AYHLVC*LDPELEK.A                | 2            | CHD4_HUMAN           |
| Q14839                                                                                              | 2             | 4.5646           | R.LANRAPEPTPQQVAQQQ.-             | 2            | CHD4_HUMAN           |
| <b><i>MICAL-like protein 1 - Homo sapiens (Human)</i></b>                                           |               |                  |                                   |              |                      |
| Q8N3F8                                                                                              | 3             | 4.8519           | K.QQHQQQLAEDAQDVPGGGPSSSAPAGAEAD  | 1            | MILK1_HUMAN          |
| Q8N3F8                                                                                              | 3             | 5.9321           | K.SSSEPAVHAPGTPGNPVSLSTNSSLASSGEL | 2            | MILK1_HUMAN          |
| Q8N3F8                                                                                              | 2             | 2.9778           | R.SSLQQENLVEQAGSSSLVNGR.L         | 1            | MILK1_HUMAN          |
| Q8N3F8                                                                                              | 2             | 4.2557           | R.VEQMPQASPGLAPR.T                | 4            | MILK1_HUMAN          |
| <b><i>MICAL-like protein 2 - Homo sapiens (Human)</i></b>                                           |               |                  |                                   |              |                      |
| Q8IY33                                                                                              | 2             | 3.7702           | K.TEAPQASPLAKPLQSSSPR.V           | 1            | MILK2_HUMAN          |
| Q8IY33                                                                                              | 2             | 2.8401           | R.ASEDSEEEPSGK.K                  | 1            | MILK2_HUMAN          |
| <b><i>Microfibrillar-associated protein 1 - Homo sapiens (Human)</i></b>                            |               |                  |                                   |              |                      |
| P55081                                                                                              | 2             | 2.9848           | R.NLTEEERR.A                      | 1            | MFAP1_HUMAN          |
| P55081                                                                                              | 3             | 3.9487           | K.AKEQEAPEEQEEDSSSDPR.L           | 3            | MFAP1_HUMAN          |
| P55081                                                                                              | 2             | 3.7842           | K.EQEAPEEQEEDSSSDPR.L             | 3            | MFAP1_HUMAN          |
| P55081                                                                                              | 2             | 3.9613           | R.DFSAPTELDHFNK.T                 | 2            | MFAP1_HUMAN          |
| P55081                                                                                              | 2             | 3.7438           | R.GAFFMDEDEEVYKR.D                | 3            | MFAP1_HUMAN          |
| P55081                                                                                              | 2             | 3.1069           | R.ISEDVEER.L                      | 4            | MFAP1_HUMAN          |
| P55081                                                                                              | 2             | 2.8443           | R.MRNLTEEER.R                     | 1            | MFAP1_HUMAN          |
| P55081                                                                                              | 1             | 2.2588           | R.NLTEEER.R                       | 1            | MFAP1_HUMAN          |
| <b><i>Microphthalmia-associated transcription factor - Homo sapiens (Human)</i></b>                 |               |                  |                                   |              |                      |
| O75030                                                                                              | 2             | 3.532            | K.LQAAQFMQQR.V                    | 2            | MITF_HUMAN           |
| <b><i>Microtubule associated serine/threonine kinase family member 4 - Homo sapiens (Human)</i></b> |               |                  |                                   |              |                      |
| Q8N4X4                                                                                              | 2             | 3.227            | R.APAAWAPASVLLER.G                | 1            | Q8N4X4_HUMA          |
| <b><i>Microtubule-actin cross-linking factor 1, isoform 4 - Homo sapiens (Human)</i></b>            |               |                  |                                   |              |                      |
| Q96PK2                                                                                              | 2             | 3.2249           | K.IEESSSQVVPQGIVSK.H              | 1            | MACF4_HUMAN          |
| <b><i>Microtubule-associated protein 1A - Homo sapiens (Human)</i></b>                              |               |                  |                                   |              |                      |
| P78559                                                                                              | 3             | 3.8282           | K.LAKREEVVEEGAK.E                 | 1            | MAP1A_HUMAN          |
| P78559                                                                                              | 2             | 3.3356           | K.REEVVEEGAK.E                    | 1            | MAP1A_HUMAN          |
| P78559                                                                                              | 3             | 4.4197           | R.FHTSTYDLPGPEGAGPFEASQPADSAVPATS | 2            | MAP1A_HUMAN          |
| <b><i>Microtubule-associated protein 2 - Homo sapiens (Human)</i></b>                               |               |                  |                                   |              |                      |
| Q8IUX2                                                                                              | 2             | 2.8619           | K.VSNSTLSK.I                      | 1            | Q8IUX2_HUMAN         |

| <i>Accession No*</i>                                                                      | <i>Charge</i> | <i>XC(Max)**</i> | <i>Peptide*</i>                    | <i>TC***</i> | <i>Reference No*</i> |
|-------------------------------------------------------------------------------------------|---------------|------------------|------------------------------------|--------------|----------------------|
| P11137                                                                                    | 3             | 5.3037           | K.DMQGTEEEKAPLALFGHTLVASLEDMK.Q    | 2            | MAP2_HUMAN           |
| P11137                                                                                    | 2             | 3.1423           | R.LASVSADAEVAR.R                   | 1            | MAP2_HUMAN           |
| P11137                                                                                    | 2             | 2.939            | R.FAALEQPEVER.R                    | 2            | MAP2_HUMAN           |
| P11137                                                                                    | 3             | 3.9248           | K.APQEADAFMGVESGHMK.E              | 1            | MAP2_HUMAN           |
| P11137                                                                                    | 2             | 3.5892           | K.HAALVSQPETTK.T                   | 2            | MAP2_HUMAN           |
| P11137                                                                                    | 2             | 3.2274           | K.DLSIPTDASSEKAEK.G                | 1            | MAP2_HUMAN           |
| P11137                                                                                    | 3             | 4.7222           | K.DAHIPVVEEHVMGK.V                 | 3            | MAP2_HUMAN           |
| P11137                                                                                    | 3             | 5.239            | K.VLEEEKEAINQETVQQR.D              | 2            | MAP2_HUMAN           |
| <b><i>Microtubule-associated protein 4 isoform 1 variant - Homo sapiens (Human)</i></b>   |               |                  |                                    |              |                      |
| Q59FT2                                                                                    | 3             | 4.1108           | K.GISEDHLES LQDVGQSAAPTFMISPETVTGT | 1            | Q59FT2_HUMAN         |
| Q59FT2                                                                                    | 3             | 7.0591           | K.GISEDHLES LQDVGQSAAPTFMISPETVTGT | 3            | Q59FT2_HUMAN         |
| <b><i>Microtubule-associated protein 8 - Homo sapiens (Human)</i></b>                     |               |                  |                                    |              |                      |
| Q27QB1                                                                                    | 3             | 4.629            | R.HDPLDPDLKVPPLPDPSSICMVDPEMLPPK.  | 1            | Q27QB1_HUMA          |
| <b><i>Microtubule-associated protein RP/EB family member 1 - Homo sapiens (Human)</i></b> |               |                  |                                    |              |                      |
| Q15691                                                                                    | 3             | 3.8321           | R.QGQETAVAPSLVAPALNKPK.K           | 1            | MARE1_HUMAN          |
| Q15691                                                                                    | 2             | 2.9979           | R.NIELICQENEGENDPVLQR.I            | 1            | MARE1_HUMAN          |
| Q15691                                                                                    | 3             | 4.9675           | K.NPGVGNGDDEAAELM#QQVNVLK.L        | 3            | MARE1_HUMAN          |
| Q15691                                                                                    | 2             | 4.6152           | K.LTVEDLEKERDFYFGK.L               | 2            | MARE1_HUMAN          |
| Q15691                                                                                    | 2             | 3.1465           | K.LTVEDLEKER.D                     | 2            | MARE1_HUMAN          |
| Q15691                                                                                    | 2             | 3.6376           | K.KPLTSSSAAPQRPSTQR.T              | 1            | MARE1_HUMAN          |
| Q15691                                                                                    | 3             | 3.7183           | K.LRNIELICQENEGENDPVLQR.I          | 1            | MARE1_HUMAN          |
| <b><i>Microtubule-associated protein RP/EB family member 2 - Homo sapiens (Human)</i></b> |               |                  |                                    |              |                      |
| Q15555                                                                                    | 2             | 3.1333           | K.LALEGVEKER.D                     | 2            | MARE2_HUMAN          |
| Q15555                                                                                    | 3             | 5.9646           | K.SDKDLETQVIQLNEQVHSLK.L           | 3            | MARE2_HUMAN          |
| Q15555                                                                                    | 2             | 2.7573           | K.SSPAAPKPGSTPSRPSSAK.R            | 1            | MARE2_HUMAN          |
| <b><i>Microtubule-associated protein tau - Homo sapiens (Human)</i></b>                   |               |                  |                                    |              |                      |
| P10636                                                                                    | 2             | 5.1361           | R.GPSLGEDTKEADLPEPSEK.Q            | 6            | TAU_HUMAN            |
| P10636                                                                                    | 2             | 3.0882           | K.SRLQTAPVPM#PDLK.N                | 1            | TAU_HUMAN            |
| P10636                                                                                    | 2             | 4.0946           | K.STPTAEDVTAPLVDEGAPGK.Q           | 5            | TAU_HUMAN            |
| P10636                                                                                    | 1             | 2.421            | K.TDHGAEIVYK.S                     | 2            | TAU_HUMAN            |
| P10636                                                                                    | 2             | 4.0449           | R.SGYSSPGSPGTPGSR.S                | 5            | TAU_HUMAN            |
| P10636                                                                                    | 2             | 4.0354           | K.VSTEIPASEPDGPSVGR.A              | 7            | TAU_HUMAN            |
| P10636                                                                                    | 2             | 3.9797           | K.TPPSSGEPKSGDR.S                  | 6            | TAU_HUMAN            |
| P10636                                                                                    | 2             | 2.8358           | R.GPSLGEDTK.E                      | 1            | TAU_HUMAN            |
| P10636                                                                                    | 4             | 5.1091           | R.GPSLGEDTKEADLPEPSEKQPAAAPR.G     | 1            | TAU_HUMAN            |

| <i>Accession No*</i>                                                                          | <i>Charge</i> | <i>XC(Max)**</i> | <i>Peptide*</i>                 | <i>TC***</i> | <i>Reference No*</i> |
|-----------------------------------------------------------------------------------------------|---------------|------------------|---------------------------------|--------------|----------------------|
| P10636                                                                                        | 3             | 3.9768           | R.HLSNVSSTGSIDMVDPQLATLADEVSLAK | 1            | TAU_HUMAN            |
| P10636                                                                                        | 2             | 3.446            | R.LQTAPVPMPDLK.N                | 4            | TAU_HUMAN            |
| P10636                                                                                        | 2             | 3.3209           | R.QEFEVMDHAGTYGLGDR.K           | 2            | TAU_HUMAN            |
| P10636                                                                                        | 3             | 4.0218           | R.QEFEVMDHAGTYGLGDRK.D          | 1            | TAU_HUMAN            |
| P10636                                                                                        | 2             | 3.9625           | K.SPVVSGDTPR.H                  | 4            | TAU_HUMAN            |
| P10636                                                                                        | 2             | 3.976            | R.EATRQPSGTGPEDEGGR.H           | 6            | TAU_HUMAN            |
| P10636                                                                                        | 3             | 3.8234           | K.HQLLGDLDHQEGPPLK.G            | 1            | TAU_HUMAN            |
| P10636                                                                                        | 2             | 2.708            | R.AAFPGAPGEGPEAR.G              | 1            | TAU_HUMAN            |
| P10636                                                                                        | 2             | 4                | K.AKTDHGAEIVYK.S                | 4            | TAU_HUMAN            |
| P10636                                                                                        | 2             | 3.3583           | K.ASPAQDGRPPQTAAR.E             | 1            | TAU_HUMAN            |
| P10636                                                                                        | 3             | 3.9739           | K.DQGGYTM#HQDQEGDTDAGLK.E       | 2            | TAU_HUMAN            |
| P10636                                                                                        | 2             | 4.0699           | K.DQGGYTMHQDQEGDTDAGLK.E        | 2            | TAU_HUMAN            |
| P10636                                                                                        | 2             | 3.0254           | K.SEKLDKDR.V                    | 1            | TAU_HUMAN            |
| P10636                                                                                        | 2             | 3.2096           | K.GQANATRIPAK.T                 | 2            | TAU_HUMAN            |
| P10636                                                                                        | 2             | 5.2742           | K.HQLLGDLDHQEGPPLKGAGGK.E       | 4            | TAU_HUMAN            |
| P10636                                                                                        | 2             | 4.4253           | K.IGSLDNITHVPGGGNK.K            | 3            | TAU_HUMAN            |
| P10636                                                                                        | 2             | 4.6499           | K.IGSLDNITHVPGGGNK.I            | 2            | TAU_HUMAN            |
| P10636                                                                                        | 1             | 2.3408           | K.IGSTENLK.H                    | 2            | TAU_HUMAN            |
| P10636                                                                                        | 2             | 3.2376           | K.KLDLSNVQSK.C                  | 3            | TAU_HUMAN            |
| P10636                                                                                        | 2             | 2.7795           | K.LDLSNVQSK.C                   | 2            | TAU_HUMAN            |
| P10636                                                                                        | 2             | 3.0508           | K.LTFRENAK.A                    | 4            | TAU_HUMAN            |
| P10636                                                                                        | 3             | 3.7653           | K.ESPLQPTEDGSEEPGSETSDAK.S      | 3            | TAU_HUMAN            |
| <b><i>Microtubule-associated serine/threonine-protein kinase 2 - Homo sapiens (Human)</i></b> |               |                  |                                 |              |                      |
| Q6P0Q8                                                                                        | 2             | 2.9211           | R.SLGPMVPSLLTGITLGPFR.M         | 2            | MAST2_HUMAN          |
| <b><i>Microtubule-associated serine/threonine-protein kinase 4 - Homo sapiens (Human)</i></b> |               |                  |                                 |              |                      |
| O15021                                                                                        | 2             | 3.6624           | R.EASAASSTSSAK.A                | 6            | MAST4_HUMAN          |
| O15021                                                                                        | 2             | 3.8757           | R.SPGTVM#ESNPQQR.E              | 2            | MAST4_HUMAN          |
| O15021                                                                                        | 2             | 3.3563           | K.SGPDVFPATPGSQNK.A             | 2            | MAST4_HUMAN          |
| O15021                                                                                        | 2             | 3.6459           | K.GKEPATQSLGGSSR.E              | 1            | MAST4_HUMAN          |
| O15021                                                                                        | 3             | 3.9221           | R.ASEGAM#SDGPVPAEHR.Q           | 1            | MAST4_HUMAN          |
| <b><i>Mimitin, mitochondrial precursor - Homo sapiens (Human)</i></b>                         |               |                  |                                 |              |                      |
| Q8N183                                                                                        | 3             | 3.9566           | K.GHASAPYFGKEEPSVAPSSTGK.T      | 1            | MIMIT_HUMAN          |
| <b><i>MIR-interacting saposin-like protein precursor - Homo sapiens (Human)</i></b>           |               |                  |                                 |              |                      |
| Q9Y2B0                                                                                        | 1             | 3.1956           | R.IDSDISGTLK.F                  | 4            | MSAP_HUMAN           |
| Q9Y2B0                                                                                        | 2             | 4.8635           | R.SEAHLTELEIEICDR.M             | 6            | MSAP_HUMAN           |

| <i>Accession No*</i>                                                                               | <i>Charge</i> | <i>XC(Max)**</i> | <i>Peptide*</i>                   | <i>TC***</i> | <i>Reference No*</i> |
|----------------------------------------------------------------------------------------------------|---------------|------------------|-----------------------------------|--------------|----------------------|
| Q9Y2B0                                                                                             | 3             | 3.7912           | R.NGESSELDLQGIRIDSDISGLK.F        | 1            | MSAP_HUMAN           |
| Q9Y2B0                                                                                             | 2             | 3.686            | R.NGESSELDLQGIR.I                 | 2            | MSAP_HUMAN           |
| Q9Y2B0                                                                                             | 2             | 3.1738           | R.MKEYGEQIDPSTHRK.N               | 1            | MSAP_HUMAN           |
| Q9Y2B0                                                                                             | 3             | 4.2642           | R.MKEYGEQIDPSTHR.K                | 2            | MSAP_HUMAN           |
| Q9Y2B0                                                                                             | 3             | 4.0161           | R.INPDGQSQSVVEVPYAR.S             | 3            | MSAP_HUMAN           |
| Q9Y2B0                                                                                             | 2             | 2.8371           | R.EADNVKDKLCSK.R                  | 1            | MSAP_HUMAN           |
| Q9Y2B0                                                                                             | 2             | 4.5504           | R.ALVDELEWEIAQVDPKK.T             | 1            | MSAP_HUMAN           |
| Q9Y2B0                                                                                             | 3             | 4.4933           | R.ALVDELEWEIAQVDPK.K              | 2            | MSAP_HUMAN           |
| Q9Y2B0                                                                                             | 1             | 2.2096           | K.TIQMGSFR.I                      | 2            | MSAP_HUMAN           |
| Q9Y2B0                                                                                             | 2             | 2.8417           | K.KTIQMGSFR.I                     | 1            | MSAP_HUMAN           |
| Q9Y2B0                                                                                             | 2             | 2.7135           | K.EYGEQIDPSTHRK.N                 | 1            | MSAP_HUMAN           |
| Q9Y2B0                                                                                             | 2             | 2.9839           | K.EYGEQIDPSTHR.K                  | 1            | MSAP_HUMAN           |
| Q9Y2B0                                                                                             | 3             | 3.8732           | R.M#KEYGEQIDPSTHR.K               | 1            | MSAP_HUMAN           |
| <b><i>Misshapen-like kinase 1 - Homo sapiens (Human)</i></b>                                       |               |                  |                                   |              |                      |
| Q8N4C8                                                                                             | 2             | 3.352            | R.SQSLQDQPTR.N                    | 2            | MINK1_HUMAN          |
| <b><i>Mitochondrial 28S ribosomal protein S36 - Homo sapiens (Human)</i></b>                       |               |                  |                                   |              |                      |
| P82909                                                                                             | 2             | 3.9912           | R.KLVSQEEM#EFIQR.G                | 1            | RT36_HUMAN           |
| P82909                                                                                             | 2             | 2.7011           | R.DNPKPNVSEALR.S                  | 1            | RT36_HUMAN           |
| P82909                                                                                             | 2             | 5.2031           | R.KLVSQEEMEFIQR.G                 | 8            | RT36_HUMAN           |
| P82909                                                                                             | 2             | 3.7873           | R.SAGLPSSHSSVISQHSK.G             | 1            | RT36_HUMAN           |
| P82909                                                                                             | 2             | 4.9582           | K.SPDLLM#YQGPPDTAEIIK.T           | 6            | RT36_HUMAN           |
| P82909                                                                                             | 2             | 3.9977           | K.LVSQEEMEFIQR.G                  | 5            | RT36_HUMAN           |
| P82909                                                                                             | 2             | 2.8733           | K.LVSQEEM#EFIQR.G                 | 1            | RT36_HUMAN           |
| P82909                                                                                             | 3             | 5.2026           | K.GSKSPDLLMYQGPPDTAEIIK.T         | 1            | RT36_HUMAN           |
| P82909                                                                                             | 3             | 3.9767           | R.RDNPKPNVSEALR.S                 | 1            | RT36_HUMAN           |
| P82909                                                                                             | 3             | 4.0108           | K.SPDLLMYQGPPDTAEIIK.T            | 2            | RT36_HUMAN           |
| <b><i>Mitochondrial 39S ribosomal protein L49 - Homo sapiens (Human)</i></b>                       |               |                  |                                   |              |                      |
| Q13405                                                                                             | 2             | 3.6666           | R.FVESVDEYQFVER.L                 | 1            | RM49_HUMAN           |
| <b><i>Mitochondrial antiviral-signaling protein - Homo sapiens (Human)</i></b>                     |               |                  |                                   |              |                      |
| Q7Z434                                                                                             | 2             | 3.8285           | K.VPANPASVSTVPSK.L                | 1            | MAVS_HUMAN           |
| Q7Z434                                                                                             | 2             | 4.1906           | R.GPVSPSVSFQPLAR.S                | 2            | MAVS_HUMAN           |
| Q7Z434                                                                                             | 3             | 6.5806           | R.EKEPSYPMPVQETQAPESPGENSEQALQTL  | 2            | MAVS_HUMAN           |
| Q7Z434                                                                                             | 2             | 2.711            | K.VSASTVPTDGSSR.N                 | 1            | MAVS_HUMAN           |
| Q7Z434                                                                                             | 3             | 6.3116           | R.ASRLPGPTGSVSTGTSTFSSSSPGLASAGAA | 2            | MAVS_HUMAN           |
| <b><i>Mitochondrial import inner membrane translocase subunit Tim10 - Homo sapiens (Human)</i></b> |               |                  |                                   |              |                      |



| <i>Accession No*</i>                                                                                        | <i>Charge</i> | <i>XC(Max)**</i> | <i>Peptide*</i>              | <i>TC***</i> | <i>Reference No*</i> |
|-------------------------------------------------------------------------------------------------------------|---------------|------------------|------------------------------|--------------|----------------------|
| P62072                                                                                                      | 2             | 3.8886           | K.LTELSMQDEELM#KR.V          | 3            | TIM10_HUMAN          |
| P62072                                                                                                      | 2             | 2.8861           | K.YLDIHER.M                  | 1            | TIM10_HUMAN          |
| P62072                                                                                                      | 2             | 4.1525           | K.LTELSMQDEELMKR.V           | 3            | TIM10_HUMAN          |
| P62072                                                                                                      | 2             | 3.4864           | K.EAELSKGESVCLDR.C           | 1            | TIM10_HUMAN          |
| P62072                                                                                                      | 2             | 3.5452           | K.LTELSMQDEELMK.R            | 3            | TIM10_HUMAN          |
| P62072                                                                                                      | 2             | 3.7349           | K.LTELSMQDEELM#K.R           | 2            | TIM10_HUMAN          |
| P62072                                                                                                      | 3             | 4.7189           | K.KLTELSMQDEELMKR.V          | 4            | TIM10_HUMAN          |
| P62072                                                                                                      | 3             | 4.9945           | K.KLTELSMQDEELM#KR.V         | 2            | TIM10_HUMAN          |
| P62072                                                                                                      | 2             | 5.4114           | K.KLTELSMQDEELMK.R           | 3            | TIM10_HUMAN          |
| <b><i>Mitochondrial import inner membrane translocase subunit Tim13 - Homo sapiens (Human)</i></b>          |               |                  |                              |              |                      |
| Q9Y5L4                                                                                                      | 2             | 5.5036           | K.VQIAVANAQELLQR.M           | 4            | TIM13_HUMAN          |
| Q9Y5L4                                                                                                      | 2             | 3.0386           | R.YMDAWNTVSR.A               | 1            | TIM13_HUMAN          |
| <b><i>Mitochondrial import inner membrane translocase subunit Tim8 A - Homo sapiens (Human)</i></b>         |               |                  |                              |              |                      |
| O60220                                                                                                      | 2             | 3.849            | K.SKPVFSESLSD.-              | 1            | TIM8A_HUMAN          |
| O60220                                                                                                      | 2             | 4.0873           | R.FIDTSQFILNR.L              | 4            | TIM8A_HUMAN          |
| O60220                                                                                                      | 2             | 4.0553           | R.FIDTSQFILNRLEQTQK.S        | 1            | TIM8A_HUMAN          |
| <b><i>Mitochondrial import inner membrane translocase subunit Tim8 B - Homo sapiens (Human)</i></b>         |               |                  |                              |              |                      |
| Q9Y5J9                                                                                                      | 2             | 3.0296           | R.FAQIVQK.G                  | 1            | TIM8B_HUMAN          |
| <b><i>Mitochondrial import inner membrane translocase subunit Tim9 - Homo sapiens (Human)</i></b>           |               |                  |                              |              |                      |
| Q9Y5J7                                                                                                      | 3             | 4.1293           | R.FQEYHIQQNEALAAK.A          | 2            | TIM9_HUMAN           |
| <b><i>Mitochondrial import receptor subunit TOM34 - Homo sapiens (Human)</i></b>                            |               |                  |                              |              |                      |
| Q15785                                                                                                      | 2             | 3.5355           | K.NRVPSAGDVEK.A              | 2            | OM34_HUMAN           |
| <b><i>Mitochondrial intermembrane space import and assembly protein 40 - Homo sapiens (Human)</i></b>       |               |                  |                              |              |                      |
| Q8N4Q1                                                                                                      | 3             | 3.9358           | K.KPAEQAEETAPIEATATKEEEGSS.- | 1            | MIA40_HUMAN          |
| Q8N4Q1                                                                                                      | 1             | 2.3735           | R.IIFVTK.E                   | 2            | MIA40_HUMAN          |
| <b><i>Mitogen-activated protein kinase 1 - Homo sapiens (Human)</i></b>                                     |               |                  |                              |              |                      |
| P28482                                                                                                      | 3             | 3.9128           | K.LKELIFEETAR.F              | 1            | MK01_HUMAN           |
| <b><i>Mitogen-activated protein kinase kinase kinase 7-interacting protein 2 - Homo sapiens (Human)</i></b> |               |                  |                              |              |                      |
| Q9NYJ8                                                                                                      | 2             | 3.972            | R.TSSTSSSVNSQTLNR.N          | 1            | TAB2_HUMAN           |
| <b><i>Mitogen-activated protein kinase kinase kinase MLT - Homo sapiens (Human)</i></b>                     |               |                  |                              |              |                      |
| Q9NYL2                                                                                                      | 2             | 3.9812           | R.DSGFSSGNTDTSSER.G          | 2            | MLTK_HUMAN           |
| <b><i>MKI67 FHA domain-interacting nucleolar phosphoprotein - Homo sapiens (Human)</i></b>                  |               |                  |                              |              |                      |
| Q9BYG3                                                                                                      | 2             | 2.8396           | K.VSGTLDTPEK.T               | 1            | MK67I_HUMAN          |
| Q9BYG3                                                                                                      | 2             | 4.1201           | K.GIDYDFPSLILQK.T            | 3            | MK67I_HUMAN          |
| <b><i>MKL/myocardin-like protein 1 - Homo sapiens (Human)</i></b>                                           |               |                  |                              |              |                      |

| <i>Accession No*</i>                                              | <i>Charge</i> | <i>XC(Max)**</i> | <i>Peptide*</i>                  | <i>TC***</i> | <i>Reference No*</i> |
|-------------------------------------------------------------------|---------------|------------------|----------------------------------|--------------|----------------------|
| Q969V6                                                            | 2             | 4.3832           | K.EAIIVGQVNYPK.V                 | 3            | MKL1_HUMAN           |
| <b><i>MKL/myocardin-like protein 2 - Homo sapiens (Human)</i></b> |               |                  |                                  |              |                      |
| Q9ULH7                                                            | 2             | 2.8676           | K.NSNSGNSALNNATPNTPR.Q           | 1            | MKL2_HUMAN           |
| <b><i>Moesin - Homo sapiens (Human)</i></b>                       |               |                  |                                  |              |                      |
| P26038                                                            | 2             | 5.9498           | R.DQKKTQEQLALEMAELTAR.I          | 6            | MOES_HUMAN           |
| P26038                                                            | 3             | 4.4753           | K.TQEQLALEMAELTAR.I              | 3            | MOES_HUMAN           |
| P26038                                                            | 1             | 3.0475           | R.ALELEQER.K                     | 5            | MOES_HUMAN           |
| P26038                                                            | 2             | 3.6268           | K.ALTSELANAR.D                   | 3            | MOES_HUMAN           |
| P26038                                                            | 2             | 3.0624           | R.AMLENEKK.K                     | 3            | MOES_HUMAN           |
| P26038                                                            | 2             | 4.4984           | K.TANDMIHAENMR.L                 | 3            | MOES_HUMAN           |
| P26038                                                            | 2             | 3.3718           | R.AQSEAEKLAK.E                   | 4            | MOES_HUMAN           |
| P26038                                                            | 3             | 4.1803           | R.DQKKTQEQLALEM#AELTAR.I         | 1            | MOES_HUMAN           |
| P26038                                                            | 2             | 3.2935           | R.ISQLEM#AR.Q                    | 1            | MOES_HUMAN           |
| P26038                                                            | 2             | 3.0472           | R.ISQLEMAR.Q                     | 1            | MOES_HUMAN           |
| P26038                                                            | 2             | 2.7985           | R.LKQIEEQTK.K                    | 1            | MOES_HUMAN           |
| P26038                                                            | 2             | 3.2795           | R.LKQIEEQTKK.A                   | 3            | MOES_HUMAN           |
| P26038                                                            | 2             | 3.303            | R.RALELEQER.K                    | 2            | MOES_HUMAN           |
| P26038                                                            | 3             | 3.9566           | R.RALELEQERK.R                   | 1            | MOES_HUMAN           |
| P26038                                                            | 3             | 4.2866           | R.SEEERTTEAEKNER.V               | 4            | MOES_HUMAN           |
| P26038                                                            | 2             | 3.3123           | K.TANDM#IHAENMR.L                | 1            | MOES_HUMAN           |
| P26038                                                            | 2             | 2.7158           | R.QEAEAEAKEALLQASR.D             | 1            | MOES_HUMAN           |
| P26038                                                            | 2             | 4.2533           | K.AQQELEEQTR.R                   | 4            | MOES_HUMAN           |
| P26038                                                            | 2             | 4.1533           | K.ALTSELANARDESK.K               | 2            | MOES_HUMAN           |
| P26038                                                            | 2             | 3.671            | K.AQM#VQEDLEK.T                  | 2            | MOES_HUMAN           |
| P26038                                                            | 2             | 4.5176           | K.ALTSELANARDESKK.T              | 2            | MOES_HUMAN           |
| P26038                                                            | 1             | 3.7519           | K.AQMVQEDLEK.T                   | 3            | MOES_HUMAN           |
| P26038                                                            | 3             | 8.0435           | K.TAMSTPHVAEPAENEQDEQDENGAEASADL | 3            | MOES_HUMAN           |
| P26038                                                            | 3             | 5.4986           | K.ERQEAEAEAKEALLQASR.D           | 8            | MOES_HUMAN           |
| P26038                                                            | 1             | 3.3547           | K.ESEAVEWQQK.A                   | 5            | MOES_HUMAN           |
| P26038                                                            | 3             | 6.2851           | K.TAM#STPHVAEPAENEQDEQDENGAEASAD | 4            | MOES_HUMAN           |
| P26038                                                            | 2             | 3.1025           | K.KAQQELEEQTRR.A                 | 2            | MOES_HUMAN           |
| P26038                                                            | 2             | 3.642            | K.KTANDM#IHAENMR.L               | 2            | MOES_HUMAN           |
| P26038                                                            | 2             | 3.6417           | K.KTANDMIHAENM#R.L               | 2            | MOES_HUMAN           |
| P26038                                                            | 2             | 4.6101           | K.KTANDMIHAENMR.L                | 3            | MOES_HUMAN           |
| P26038                                                            | 2             | 3.3522           | K.KTQEQLALEM#AELTAR.I            | 2            | MOES_HUMAN           |
| P26038                                                            | 2             | 2.947            | K.QRIDEFESM#.-                   | 2            | MOES_HUMAN           |

| <i>Accession No*</i>                                                           | <i>Charge</i> | <i>XC(Max)**</i> | <i>Peptide*</i>                   | <i>TC***</i> | <i>Reference No*</i> |
|--------------------------------------------------------------------------------|---------------|------------------|-----------------------------------|--------------|----------------------|
| P26038                                                                         | 2             | 4.2251           | K.KAQQELEEQTR.R                   | 2            | MOES_HUMAN           |
| P26038                                                                         | 2             | 3.4901           | K.AQM#VQEDLEKTR.A                 | 1            | MOES_HUMAN           |
| <b><i>Mono-ADP-ribosyltransferase sirtuin-6 - Homo sapiens (Human)</i></b>     |               |                  |                                   |              |                      |
| Q8N6T7                                                                         | 2             | 2.8961           | K.EESPTRINGSIPAGPK.Q              | 1            | SIRT6_HUMAN          |
| <b><i>Monocarboxylate transporter 1 - Homo sapiens (Human)</i></b>             |               |                  |                                   |              |                      |
| P53985                                                                         | 2             | 3.1589           | K.AAESPDQKDTEGGPKKEEESPV.-        | 1            | MOT1_HUMAN           |
| P53985                                                                         | 2             | 2.8047           | K.DTEGGPKKEEESPV.-                | 1            | MOT1_HUMAN           |
| <b><i>Monocarboxylate transporter 4 - Homo sapiens (Human)</i></b>             |               |                  |                                   |              |                      |
| O15427                                                                         | 2             | 2.7664           | K.NGEVVHTPETS.V-                  | 1            | MOT4_HUMAN           |
| <b><i>MORC family CW-type zinc finger protein 3 - Homo sapiens (Human)</i></b> |               |                  |                                   |              |                      |
| Q14149                                                                         | 3             | 4.8817           | R.INAELLFRPTALSTPSFSSPK.E         | 2            | MORC3_HUMAN          |
| <b><i>MORF4 family-associated protein 1 - Homo sapiens (Human)</i></b>         |               |                  |                                   |              |                      |
| Q9Y605                                                                         | 2             | 3.2871           | K.MAEMLVELVR.R                    | 1            | Q9Y605_HUMAN         |
| Q9Y605                                                                         | 3             | 3.912            | K.TQVEASEESALNHLQNPGDAAEGR.A      | 1            | Q9Y605_HUMAN         |
| <b><i>Mortality factor 4-like protein 1 - Homo sapiens (Human)</i></b>         |               |                  |                                   |              |                      |
| Q9UBU8                                                                         | 2             | 2.7877           | K.ANQEQAEGK.M                     | 1            | MO4L1_HUMAN          |
| <b><i>Mothers against decapentaplegic homolog 2 - Homo sapiens (Human)</i></b> |               |                  |                                   |              |                      |
| Q15796                                                                         | 2             | 3.7634           | K.SAGSGGGAGGGEQNGQEEK.W           | 1            | SMAD2_HUMAN          |
| <b><i>M-phase phosphoprotein 6 - Homo sapiens (Human)</i></b>                  |               |                  |                                   |              |                      |
| Q99547                                                                         | 3             | 4.0885           | R.RYETLVGTIGKK.F                  | 1            | MPH6_HUMAN           |
| <b><i>M-phase phosphoprotein 8 - Homo sapiens (Human)</i></b>                  |               |                  |                                   |              |                      |
| Q99549                                                                         | 3             | 4.6477           | K.FVESQVESESSLVNDSPFPEDDSEGLHSDSR | 1            | MPP8_HUMAN           |
| Q99549                                                                         | 2             | 4.5402           | K.SKPDLESSLESVFDLR.T              | 2            | MPP8_HUMAN           |
| <b><i>MRG-binding protein - Homo sapiens (Human)</i></b>                       |               |                  |                                   |              |                      |
| Q9NV56                                                                         | 2             | 4.0473           | K.VLTANSNPSSPSAAK.R               | 2            | MRGBP_HUMAN          |
| <b><i>MSTP116 - Homo sapiens (Human)</i></b>                                   |               |                  |                                   |              |                      |
| Q7Z2S7                                                                         | 3             | 3.7696           | R.SLLKEEDPAVLISEVLR.R             | 1            | Q7Z2S7_HUMAN         |
| <b><i>Msx2-interacting protein - Homo sapiens (Human)</i></b>                  |               |                  |                                   |              |                      |
| Q96T58                                                                         | 3             | 4.7115           | K.VDATRPEATTEVGPQIGVK.E           | 2            | MINT_HUMAN           |
| <b><i>Multidrug resistance-associated protein 9 - Homo sapiens (Human)</i></b> |               |                  |                                   |              |                      |
| Q96J65                                                                         | 2             | 3.0039           | R.EEDAGIIVLAPGNEKDEGK.E           | 1            | MRP9_HUMAN           |
| <b><i>Multimerin-2 precursor - Homo sapiens (Human)</i></b>                    |               |                  |                                   |              |                      |
| Q9H8L6                                                                         | 4             | 5.2282           | R.QLDGSSLQALQNAVDAVSLAVDAHKAEGER. | 2            | MMRN2_HUMAN          |
| Q9H8L6                                                                         | 2             | 4.333            | R.REEELQYTLDMR.A                  | 3            | MMRN2_HUMAN          |

| <i>Accession No*</i>                                                                            | <i>Charge</i> | <i>XC(Max)**</i> | <i>Peptide*</i>                    | <i>TC***</i> | <i>Reference No*</i> |
|-------------------------------------------------------------------------------------------------|---------------|------------------|------------------------------------|--------------|----------------------|
| Q9H8L6                                                                                          | 1             | 2.1497           | R.VILMEK.S                         | 1            | MMRN2_HUMAN          |
| Q9H8L6                                                                                          | 2             | 5.3763           | R.VALQDAASGLQEQALGWDELAAR.V        | 2            | MMRN2_HUMAN          |
| Q9H8L6                                                                                          | 2             | 3.3798           | R.VADSLPGLWK.A                     | 2            | MMRN2_HUMAN          |
| Q9H8L6                                                                                          | 3             | 4.3947           | R.SQVQALDDEVGALKAAAAEAR.H          | 1            | MMRN2_HUMAN          |
| Q9H8L6                                                                                          | 2             | 5.0389           | R.SQVQALDDEVGALK.A                 | 2            | MMRN2_HUMAN          |
| Q9H8L6                                                                                          | 2             | 4.1198           | R.SISELQADVDTKLR.R                 | 2            | MMRN2_HUMAN          |
| Q9H8L6                                                                                          | 1             | 3.7273           | R.SISELQADVDTK.L                   | 4            | MMRN2_HUMAN          |
| Q9H8L6                                                                                          | 2             | 2.7717           | R.VQDSAVAR.A                       | 1            | MMRN2_HUMAN          |
| Q9H8L6                                                                                          | 2             | 3.0417           | R.ALEETQVSLDERR.Q                  | 2            | MMRN2_HUMAN          |
| Q9H8L6                                                                                          | 2             | 4.2343           | K.AEAEDTSKDPVGR.N                  | 2            | MMRN2_HUMAN          |
| Q9H8L6                                                                                          | 2             | 2.8115           | R.REEELQYTLEDM#R.A                 | 1            | MMRN2_HUMAN          |
| Q9H8L6                                                                                          | 2             | 3.4253           | R.ADFQELGAK.F                      | 6            | MMRN2_HUMAN          |
| Q9H8L6                                                                                          | 2             | 2.9957           | R.ELQSLSDNVK.N                     | 1            | MMRN2_HUMAN          |
| Q9H8L6                                                                                          | 3             | 5.4287           | R.HVDEIKELYSEDETDFDQISK.V          | 2            | MMRN2_HUMAN          |
| Q9H8L6                                                                                          | 2             | 5.3524           | R.LRSQVQALDDEVGALK.A               | 3            | MMRN2_HUMAN          |
| Q9H8L6                                                                                          | 3             | 5.832            | R.QLDGSSLQALQNAVDAVSLAVDAHK.A      | 1            | MMRN2_HUMAN          |
| Q9H8L6                                                                                          | 3             | 4.1743           | R.QLHSAFAALLEDALR.H                | 1            | MMRN2_HUMAN          |
| Q9H8L6                                                                                          | 2             | 2.9092           | K.LYLDLDVIR.E                      | 1            | MMRN2_HUMAN          |
| <b><i>Multiple coagulation factor deficiency protein 2 precursor - Homo sapiens (Human)</i></b> |               |                  |                                    |              |                      |
| Q8NI22                                                                                          | 4             | 5.1874           | K.NTVHDQEHIHEHLEGVINKPEAEM#SPQELQL | 1            | MCFD2_HUMAN          |
| Q8NI22                                                                                          | 4             | 6.765            | K.NTVHDQEHIHEHLEGVINKPEAEMSPQELQL  | 3            | MCFD2_HUMAN          |
| <b><i>Multiple myeloma tumor-associated protein 2 - Homo sapiens (Human)</i></b>                |               |                  |                                    |              |                      |
| Q9BU76                                                                                          | 2             | 4.1655           | R.VESGGPGTSAASAR.R                 | 2            | MMTA2_HUMAN          |
| <b><i>Muted protein homolog - Homo sapiens (Human)</i></b>                                      |               |                  |                                    |              |                      |
| Q8TDH9                                                                                          | 3             | 4.1386           | K.IHSDHLVASEK.Q                    | 1            | MUTED_HUMAN          |
| <b><i>Myc box-dependent-interacting protein 1 - Homo sapiens (Human)</i></b>                    |               |                  |                                    |              |                      |
| O00499                                                                                          | 2             | 3.1102           | R.KGPPVPPPK.H                      | 2            | BIN1_HUMAN           |
| O00499                                                                                          | 2             | 2.7351           | R.LDLPPGFMFK.V                     | 2            | BIN1_HUMAN           |
| O00499                                                                                          | 2             | 4.9635           | R.VNHEPEPAGGATPGATLPK.S            | 2            | BIN1_HUMAN           |
| O00499                                                                                          | 2             | 5.8901           | K.VQAQHDYATDTDELQLK.A              | 12           | BIN1_HUMAN           |
| O00499                                                                                          | 2             | 4.3442           | K.SPSPDPGSPAATPEIR.V               | 1            | BIN1_HUMAN           |
| O00499                                                                                          | 3             | 3.8675           | K.LVDQALLTMDTYLGQFPDIK.S           | 1            | BIN1_HUMAN           |
| O00499                                                                                          | 2             | 3.0026           | R.GVFPENFTEVP.-                    | 2            | BIN1_HUMAN           |
| <b><i>Myc target protein 1. - Homo sapiens (Human)</i></b>                                      |               |                  |                                    |              |                      |
| Q8N699                                                                                          | 2             | 3.4033           | R.SNLSLASLTFQR.Q                   | 1            | Q8N699_HUMAN         |

| <i>Accession No*</i>                                                                 | <i>Charge</i> | <i>XC(Max)**</i> | <i>Peptide*</i>                  | <i>TC***</i> | <i>Reference No*</i> |
|--------------------------------------------------------------------------------------|---------------|------------------|----------------------------------|--------------|----------------------|
| <b><i>Myelin basic protein - Homo sapiens (Human)</i></b>                            |               |                  |                                  |              |                      |
| P02686                                                                               | 1             | 2.252            | R.NLGELSR.T                      | 1            | MBP_HUMAN            |
| <b><i>Myelin expression factor 2 - Homo sapiens (Human)</i></b>                      |               |                  |                                  |              |                      |
| Q9P2K5                                                                               | 2             | 2.9318           | R.REPHPAEAEK.Q                   | 1            | MYEF2_HUMAN          |
| <b><i>Myeloid cell nuclear differentiation antigen - Homo sapiens (Human)</i></b>    |               |                  |                                  |              |                      |
| P41218                                                                               | 2             | 4.5615           | K.INQEEVGLAAPAPTAR.N             | 4            | MNDA_HUMAN           |
| P41218                                                                               | 2             | 5.3405           | K.KINQEEVGLAAPAPTAR.N            | 3            | MNDA_HUMAN           |
| <b><i>MYL6 protein - Homo sapiens (Human)</i></b>                                    |               |                  |                                  |              |                      |
| Q6IBG5                                                                               | 3             | 4.5228           | K.MTEEEVEM#LVAGHEDSNGCINYEELVR.M | 1            | Q6IBG5_HUMAN         |
| <b><i>Myocyte-specific enhancer factor 2C - Homo sapiens (Human)</i></b>             |               |                  |                                  |              |                      |
| Q06413                                                                               | 2             | 3.0356           | R.NSPGLLVSPGNLNK.N               | 2            | MEF2C_HUMAN          |
| <b><i>MyoD family inhibitor domain-containing protein - Homo sapiens (Human)</i></b> |               |                  |                                  |              |                      |
| Q9P1T7                                                                               | 2             | 6.2413           | R.VAEAGGGQLGSTAQQK.C             | 3            | MDFIC_HUMAN          |
| <b><i>Myosin light chain kinase, smooth muscle - Homo sapiens (Human)</i></b>        |               |                  |                                  |              |                      |
| Q15746                                                                               | 3             | 4.8745           | K.KKLPAAENGSSSAETLNAK.A          | 2            | MYLK_HUMAN           |
| Q15746                                                                               | 2             | 4.1949           | K.SSLPPVLGTESDATVK.K             | 9            | MYLK_HUMAN           |
| Q15746                                                                               | 3             | 3.7737           | K.TLSEDDLKEIPAEQMDFR.A           | 1            | MYLK_HUMAN           |
| Q15746                                                                               | 2             | 3.0171           | K.VHSPQQVDFR.S                   | 1            | MYLK_HUMAN           |
| Q15746                                                                               | 2             | 4.1667           | R.APGLGVLSPSGEER.K               | 2            | MYLK_HUMAN           |
| Q15746                                                                               | 2             | 3.5602           | R.LSSMAM#ISGLSGR.K               | 1            | MYLK_HUMAN           |
| Q15746                                                                               | 2             | 4.4699           | R.LSSMAMISGLSGR.K                | 3            | MYLK_HUMAN           |
| <b><i>Myosin light polypeptide 4 - Homo sapiens (Human)</i></b>                      |               |                  |                                  |              |                      |
| P12829                                                                               | 2             | 3.2058           | R.ALGQNPTNAEVLR.V                | 1            | MYL4_HUMAN           |
| P12829                                                                               | 2             | 4.1258           | R.NKEQGTIEDFVEGLR.V              | 2            | MYL4_HUMAN           |
| P12829                                                                               | 3             | 4.0776           | K.PAPAPAPAPAPAPAPEAPKEPAFDPK.S   | 2            | MYL4_HUMAN           |
| <b><i>Myosin light polypeptide 6 - Homo sapiens (Human)</i></b>                      |               |                  |                                  |              |                      |
| P60660                                                                               | 2             | 3.6472           | K.EAFQLFDRTGDGK.I                | 2            | MYL6_HUMAN           |
| P60660                                                                               | 3             | 4.1755           | K.MTEEEVEM#LVAGHEDSNGCINYEAFVR.H | 1            | MYL6_HUMAN           |
| P60660                                                                               | 2             | 3.0677           | R.TGDGKILYSQCGDVMR.A             | 1            | MYL6_HUMAN           |
| P60660                                                                               | 2             | 2.7169           | K.EAFQLFDR.T                     | 1            | MYL6_HUMAN           |
| <b><i>Myosin light polypeptide 6B - Homo sapiens (Human)</i></b>                     |               |                  |                                  |              |                      |
| P14649                                                                               | 2             | 4.9338           | R.RVDFETFLPMLQAVAK.N             | 1            | MYL6B_HUMAN          |
| P14649                                                                               | 3             | 4.3095           | K.NRGQGTIEDYLEGFR.V              | 5            | MYL6B_HUMAN          |
| P14649                                                                               | 2             | 2.7281           | K.PAAAGAPPAK.T                   | 1            | MYL6B_HUMAN          |
| P14649                                                                               | 2             | 3.9298           | K.TKAEPVQPAPQK.T                 | 2            | MYL6B_HUMAN          |

| <i>Accession No*</i>                                                            | <i>Charge</i> | <i>XC(Max)**</i> | <i>Peptide*</i>                  | <i>TC***</i> | <i>Reference No*</i> |
|---------------------------------------------------------------------------------|---------------|------------------|----------------------------------|--------------|----------------------|
| P14649                                                                          | 2             | 3.1123           | R.GQGTIEDYLEGFR.V                | 1            | MYL6B_HUMAN          |
| P14649                                                                          | 2             | 2.7446           | R.HVLTTLGEK.M                    | 1            | MYL6B_HUMAN          |
| <b><i>Myosin phosphatase Rho-interacting protein - Homo sapiens (Human)</i></b> |               |                  |                                  |              |                      |
| Q6WCQ1                                                                          | 2             | 3.3844           | R.SKSVIEQVSWDT.-                 | 1            | MRIP_HUMAN           |
| Q6WCQ1                                                                          | 2             | 2.7116           | R.FGM#LDATDGPGETDAALR.M          | 1            | MRIP_HUMAN           |
| Q6WCQ1                                                                          | 3             | 3.8037           | K.HVHPTTAPDVTSSLPEEK.N           | 2            | MRIP_HUMAN           |
| Q6WCQ1                                                                          | 3             | 4.4218           | K.TFDWAEFRPIQQALAQER.V           | 1            | MRIP_HUMAN           |
| <b><i>Myosin-10 - Homo sapiens (Human)</i></b>                                  |               |                  |                                  |              |                      |
| P35580                                                                          | 3             | 4.0156           | R.ALEQQVEEMRTQLEEELEDELQATEDAK.L | 1            | MYH10_HUMAN          |
| P35580                                                                          | 3             | 5.3033           | R.HATALEELSEQLEQAKR.F            | 2            | MYH10_HUMAN          |
| P35580                                                                          | 2             | 3.0888           | R.QLEEAEEEAATR.A                 | 2            | MYH10_HUMAN          |
| P35580                                                                          | 2             | 3.232            | R.GGPISFSSSR.S                   | 2            | MYH10_HUMAN          |
| P35580                                                                          | 2             | 4.3991           | R.ELDDATEANEGLSR.E               | 10           | MYH10_HUMAN          |
| P35580                                                                          | 2             | 3.8045           | R.DLQTRDEQNEEK.K                 | 2            | MYH10_HUMAN          |
| P35580                                                                          | 2             | 2.8023           | R.ASRDEIFAQSK.E                  | 1            | MYH10_HUMAN          |
| P35580                                                                          | 2             | 3.601            | K.LQNELDNVSTLLEEA EK.K           | 1            | MYH10_HUMAN          |
| P35580                                                                          | 3             | 4.3803           | K.KLDAQVQELHAK.V                 | 2            | MYH10_HUMAN          |
| P35580                                                                          | 3             | 3.9019           | K.IGQLEEQLEQEAKER.A              | 3            | MYH10_HUMAN          |
| P35580                                                                          | 2             | 5.0266           | K.IGQLEEQLEQEAK.E                | 2            | MYH10_HUMAN          |
| P35580                                                                          | 3             | 5.4733           | K.NRLQQELDDLTVDLDHQR.Q           | 1            | MYH10_HUMAN          |
| P35580                                                                          | 2             | 3.8664           | K.DAASLESQEQDTQELLQEETR.Q        | 2            | MYH10_HUMAN          |
| P35580                                                                          | 2             | 3.3987           | K.AKLQELEGAVK.S                  | 1            | MYH10_HUMAN          |
| P35580                                                                          | 2             | 3.5114           | R.RGGPISFSSSR.S                  | 2            | MYH10_HUMAN          |
| <b><i>Myosin-14 - Homo sapiens (Human)</i></b>                                  |               |                  |                                  |              |                      |
| Q7Z406                                                                          | 2             | 3.038            | R.QEEEEAGALEAGEEARR.R            | 1            | MYH14_HUMAN          |
| <b><i>Myosin-6 - Homo sapiens (Human)</i></b>                                   |               |                  |                                  |              |                      |
| P13533                                                                          | 2             | 3.0614           | K.KALQEAHQALDDQLQVEEDK.V         | 3            | MYH6_HUMAN           |
| <b><i>Myosin-9 - Homo sapiens (Human)</i></b>                                   |               |                  |                                  |              |                      |
| P35579                                                                          | 3             | 3.892            | K.REQEVNLIK.K.T                  | 2            | MYH9_HUMAN           |
| P35579                                                                          | 2             | 4.2916           | K.VLLQGKGDSEHKR.K                | 4            | MYH9_HUMAN           |
| P35579                                                                          | 1             | 2.2154           | K.VLLQK.G                        | 4            | MYH9_HUMAN           |
| P35579                                                                          | 2             | 4.0922           | K.VEAQLQELQVK.F                  | 1            | MYH9_HUMAN           |
| P35579                                                                          | 1             | 2.8999           | K.VAAYDKLEK.T                    | 2            | MYH9_HUMAN           |
| P35579                                                                          | 3             | 6.9569           | K.TRLQQELDDLLVDLDHQR.Q           | 3            | MYH9_HUMAN           |
| P35579                                                                          | 3             | 5.6134           | K.TLEEEAKTHEAQIQEMR.Q            | 6            | MYH9_HUMAN           |

| <i>Accession No*</i> | <i>Charge</i> | <i>XC(Max)**</i> | <i>Peptide*</i>                 | <i>TC***</i> | <i>Reference No*</i> |
|----------------------|---------------|------------------|---------------------------------|--------------|----------------------|
| P35579               | 2             | 3.9459           | K.TLEEEAKTHEAQIQEM#R.Q          | 2            | MYH9_HUMAN           |
| P35579               | 4             | 5.5793           | R.DLGEELEALKTELEDTLDSTAAQQELR.S | 2            | MYH9_HUMAN           |
| P35579               | 2             | 3.4915           | K.THEAQIQEM#R.Q                 | 1            | MYH9_HUMAN           |
| P35579               | 2             | 5.3429           | R.KKVEAQLQELQVK.F               | 4            | MYH9_HUMAN           |
| P35579               | 2             | 3.3293           | K.THEAQIQEMR.Q                  | 2            | MYH9_HUMAN           |
| P35579               | 2             | 4.1002           | R.ELESQISELQEDLESER.A           | 2            | MYH9_HUMAN           |
| P35579               | 1             | 2.2691           | R.EQEVNILK.K                    | 2            | MYH9_HUMAN           |
| P35579               | 2             | 3.4273           | R.EQLEEEEEAKHNLEK.Q             | 1            | MYH9_HUMAN           |
| P35579               | 2             | 5.1785           | R.IAEFTTNLTETEEKSK.S            | 3            | MYH9_HUMAN           |
| P35579               | 3             | 5.0749           | K.NKHEAMITDLEER.L               | 4            | MYH9_HUMAN           |
| P35579               | 3             | 4.0685           | R.LQQELDDLVDLDHQR.Q             | 2            | MYH9_HUMAN           |
| P35579               | 3             | 4.2559           | R.QKHSQAVEELAEQLEQTK.R          | 2            | MYH9_HUMAN           |
| P35579               | 2             | 3.4528           | R.QKHSQAVEELAEQLEQTKR.V         | 2            | MYH9_HUMAN           |
| P35579               | 3             | 4.319            | R.RKLEGDSTDLSDQIAELQAQIAELK.M   | 1            | MYH9_HUMAN           |
| P35579               | 1             | 3.2099           | R.TELADKVTK.L                   | 5            | MYH9_HUMAN           |
| P35579               | 2             | 3.0908           | R.VEEEEAQK.N                    | 2            | MYH9_HUMAN           |
| P35579               | 2             | 3.2379           | R.IAEFTTNLTETEEK.S              | 2            | MYH9_HUMAN           |
| P35579               | 2             | 5.7831           | K.IRELESQISELQEDLESER.A         | 5            | MYH9_HUMAN           |
| P35579               | 2             | 5.0552           | K.AKQTLENERGELANEVK.V           | 3            | MYH9_HUMAN           |
| P35579               | 3             | 5.683            | K.DFSALESQIQDTQELLQEENR.Q       | 2            | MYH9_HUMAN           |
| P35579               | 2             | 4.5139           | K.DFSALESQIQDTQELLQEENRQK.L     | 1            | MYH9_HUMAN           |
| P35579               | 2             | 3.0345           | K.DLEGLSQR.H                    | 2            | MYH9_HUMAN           |
| P35579               | 2             | 3.2333           | K.DLEGLSQRHEEK.V                | 3            | MYH9_HUMAN           |
| P35579               | 1             | 2.2493           | K.FNEGER.V                      | 3            | MYH9_HUMAN           |
| P35579               | 2             | 3.9297           | K.HEAMITDLEER.L                 | 3            | MYH9_HUMAN           |
| P35579               | 2             | 3.2161           | K.QIATLHAQVADMKK.K              | 2            | MYH9_HUMAN           |
| P35579               | 3             | 5.641            | K.HSQAVEELAEQLEQTKR.V           | 5            | MYH9_HUMAN           |
| P35579               | 2             | 3.3382           | K.QTLENERGELANEVK.V             | 2            | MYH9_HUMAN           |
| P35579               | 3             | 4.9523           | K.KEEELQAALARVEEEAAQK.N         | 2            | MYH9_HUMAN           |
| P35579               | 3             | 4.9395           | K.LTKDFSALESQIQDTQELLQEENRQK.L  | 1            | MYH9_HUMAN           |
| P35579               | 2             | 3.6121           | K.QIATLHAQVADMK.K               | 3            | MYH9_HUMAN           |
| P35579               | 2             | 5.8314           | K.HSQAVEELAEQLEQTKR.R           | 3            | MYH9_HUMAN           |
| P35579               | 3             | 4.0624           | K.NKHEAM#ITDLEER.L              | 3            | MYH9_HUMAN           |
| P35579               | 2             | 4.6106           | K.KLEEEQIILEDQNCK.L             | 4            | MYH9_HUMAN           |
| P35579               | 3             | 7.5245           | K.LTKDFSALESQIQDTQELLQEENR.Q    | 3            | MYH9_HUMAN           |
| P35579               | 2             | 5.9252           | K.LQVELDNVTGLLSQSDSK.S          | 7            | MYH9_HUMAN           |

| <i>Accession No*</i>                                                               | <i>Charge</i> | <i>XC(Max)**</i> | <i>Peptide*</i>                  | <i>TC***</i> | <i>Reference No*</i> |
|------------------------------------------------------------------------------------|---------------|------------------|----------------------------------|--------------|----------------------|
| P35579                                                                             | 3             | 6.4594           | K.LLEDRIAFTTNLTETEEKSK.S         | 2            | MYH9_HUMAN           |
| P35579                                                                             | 3             | 4.6443           | K.LKNKHEAMITDLEER.L              | 4            | MYH9_HUMAN           |
| P35579                                                                             | 2             | 5.3882           | K.KVEAQLQELQVK.F                 | 5            | MYH9_HUMAN           |
| P35579                                                                             | 2             | 5.9619           | K.KTLEEEAKTHEAQIQEMR.Q           | 5            | MYH9_HUMAN           |
| P35579                                                                             | 3             | 5.2244           | K.KMEDSVGCLETAEEVKR.K            | 4            | MYH9_HUMAN           |
| <b><i>Myosin-Ie - Homo sapiens (Human)</i></b>                                     |               |                  |                                  |              |                      |
| Q12965                                                                             | 2             | 3.8894           | K.VLQVSIGPLPK.N                  | 2            | MYO1E_HUMAN          |
| Q12965                                                                             | 2             | 4.0885           | R.NTTQNTGYSSGTQNaNYPVR.A         | 3            | MYO1E_HUMAN          |
| <b><i>Myosin-If - Homo sapiens (Human)</i></b>                                     |               |                  |                                  |              |                      |
| O00160                                                                             | 3             | 4.1693           | R.ARPPSEHNTEFLNVPDQGMAGMQR.K     | 1            | MYO1F_HUMAN          |
| O00160                                                                             | 2             | 3.9013           | R.GPPSTSLGASR.R                  | 2            | MYO1F_HUMAN          |
| <b><i>Myosin-IXA - Homo sapiens (Human)</i></b>                                    |               |                  |                                  |              |                      |
| Q9UNJ2                                                                             | 2             | 3.4014           | R.ELEQAIFSLLELLK.V               | 1            | Q9UNJ2_HUMA          |
| <b><i>Myosin-Va - Homo sapiens (Human)</i></b>                                     |               |                  |                                  |              |                      |
| Q9Y411                                                                             | 2             | 2.9645           | K.QETEQLVSNLKEENTLLK.Q           | 1            | MYO5A_HUMAN          |
| <b><i>Myosin-XVB - Homo sapiens (Human)</i></b>                                    |               |                  |                                  |              |                      |
| Q96JP2                                                                             | 2             | 3.3297           | K.EAEAEPAKETAAK.G                | 4            | MO15B_HUMAN          |
| Q96JP2                                                                             | 3             | 6.7626           | K.VHIPQGEAQEEEEEEEEEEQEEQEVETR.A | 2            | MO15B_HUMAN          |
| <b><i>Myosin-XVIIIa - Homo sapiens (Human)</i></b>                                 |               |                  |                                  |              |                      |
| Q92614                                                                             | 2             | 2.9546           | K.EMESRDEEVEEAR.Q                | 1            | MY18A_HUMAN          |
| Q92614                                                                             | 3             | 4.267            | K.VKDQEEELDEQAGTIQMLEQAK.L       | 1            | MY18A_HUMAN          |
| Q92614                                                                             | 3             | 5.4012           | R.RFDSELSQAHEEAQR.E              | 2            | MY18A_HUMAN          |
| <b><i>Myotrophin - Homo sapiens (Human)</i></b>                                    |               |                  |                                  |              |                      |
| P58546                                                                             | 3             | 4.0753           | K.GADINAPDKHHITPLLSAVYEGHVSCVK.L | 1            | MTPN_HUMAN           |
| P58546                                                                             | 3             | 5.6008           | K.GADKTVKGPDGLTAFEATDNQAIK.A     | 1            | MTPN_HUMAN           |
| P58546                                                                             | 2             | 5.508            | K.GPDGLTAFEATDNQAIK.A            | 14           | MTPN_HUMAN           |
| P58546                                                                             | 2             | 4.2464           | K.NGDLDEVKDYVAK.G                | 4            | MTPN_HUMAN           |
| P58546                                                                             | 2             | 5.1479           | K.NGDLDEVKDYVAKGEDVNR.T          | 6            | MTPN_HUMAN           |
| P58546                                                                             | 2             | 5.7346           | K.TVKGPDGLTAFEATDNQAIK.A         | 7            | MTPN_HUMAN           |
| <b><i>Myristoylated alanine-rich C-kinase substrate - Homo sapiens (Human)</i></b> |               |                  |                                  |              |                      |
| P29966                                                                             | 1             | 2.1761           | K.LSGFSFK.K                      | 2            | MARCS_HUMAN          |
| P29966                                                                             | 3             | 4.5859           | K.TAAKGAAAERPGEAAVASSPSK.A       | 1            | MARCS_HUMAN          |
| P29966                                                                             | 2             | 5.4504           | K.GEPAAAAPEAGASPEK.E             | 3            | MARCS_HUMAN          |
| P29966                                                                             | 3             | 4.7172           | K.EELQANGSAPAADKEEPAAAGSGAASPSAA | 1            | MARCS_HUMAN          |
| P29966                                                                             | 2             | 5.3038           | K.EAGEGGEAEAPAAEGGK.D            | 6            | MARCS_HUMAN          |



| <i>Accession No*</i>                                                                              | <i>Charge</i> | <i>XC(Max)**</i> | <i>Peptide*</i>                   | <i>TC***</i> | <i>Reference No*</i> |
|---------------------------------------------------------------------------------------------------|---------------|------------------|-----------------------------------|--------------|----------------------|
| P29966                                                                                            | 2             | 3.5516           | K.AEDGATPSPSNETPKK.K              | 1            | MARCS_HUMAN          |
| P29966                                                                                            | 2             | 3.2868           | K.AAEEPSKVEEK.K                   | 3            | MARCS_HUMAN          |
| P29966                                                                                            | 2             | 3.9403           | K.AEDGATPSPSNETPK.K               | 12           | MARCS_HUMAN          |
| P29966                                                                                            | 2             | 4.7779           | K.EAPAEGEAAEPGSPTAAEGEAASAASSTSSP | 5            | MARCS_HUMAN          |
| <b><i>N(G),N(G)-dimethylarginine dimethylaminohydrolase 1 - Homo sapiens (Human)</i></b>          |               |                  |                                   |              |                      |
| O94760                                                                                            | 2             | 3.5625           | R.ALPESLGQHALR.S                  | 3            | DDAH1_HUMAN          |
| O94760                                                                                            | 3             | 4.6836           | R.QHQLYVGVLGSK.L                  | 1            | DDAH1_HUMAN          |
| O94760                                                                                            | 2             | 3.7738           | R.SAKGEEVDVAR.A                   | 6            | DDAH1_HUMAN          |
| O94760                                                                                            | 2             | 3.2909           | R.TPEEYPESAK.V                    | 4            | DDAH1_HUMAN          |
| O94760                                                                                            | 3             | 3.7907           | R.TPEEYPESAKVYEK.L                | 1            | DDAH1_HUMAN          |
| <b><i>N(G),N(G)-dimethylarginine dimethylaminohydrolase 2 - Homo sapiens (Human)</i></b>          |               |                  |                                   |              |                      |
| O95865                                                                                            | 3             | 4.0413           | K.AGAGLSSLCLVLSTRPHS.-            | 1            | DDAH2_HUMAN          |
| <b><i>N-acetylglucosamine-6-sulfatase precursor - Homo sapiens (Human)</i></b>                    |               |                  |                                   |              |                      |
| P15586                                                                                            | 2             | 2.8574           | K.IQEPNTFPAILR.S                  | 1            | GNS_HUMAN            |
| P15586                                                                                            | 2             | 2.9353           | R.WQTLLSVDDLVEK.L                 | 1            | GNS_HUMAN            |
| <b><i>N-acetylmuramoyl-L-alanine amidase precursor - Homo sapiens (Human)</i></b>                 |               |                  |                                   |              |                      |
| Q96PD5                                                                                            | 2             | 4.3789           | R.DGSPDVTTADIGANTPDATK.G          | 2            | PGRP2_HUMAN          |
| <b><i>N-acetyltransferase 12 - Homo sapiens (Human)</i></b>                                       |               |                  |                                   |              |                      |
| Q147X3                                                                                            | 2             | 4.2389           | R.SPAGGESATVAAK.G                 | 3            | Q147X3_HUMAN         |
| <b><i>N-acylneuraminate cytidyltransferase - Homo sapiens (Human)</i></b>                         |               |                  |                                   |              |                      |
| Q8NFW8                                                                                            | 1             | 3.2501           | K.GAATSVSNPR.G                    | 3            | NEUA_HUMAN           |
| <b><i>NADH dehydrogenase - Homo sapiens (Human)</i></b>                                           |               |                  |                                   |              |                      |
| Q8WU60                                                                                            | 2             | 5.3549           | R.GKLLATQTAAELSK.N                | 3            | Q8WU60_HUMA          |
| Q8WU60                                                                                            | 2             | 4.4929           | R.KVASPSPSGSVLFTDEGVPK.F          | 2            | Q8WU60_HUMA          |
| Q8WU60                                                                                            | 2             | 3.4174           | K.LLATQTAAELSK.N                  | 2            | Q8WU60_HUMA          |
| Q8WU60                                                                                            | 2             | 3.1597           | R.KTLVEFPQK.V                     | 3            | Q8WU60_HUMA          |
| Q8WU60                                                                                            | 3             | 4.2115           | R.LNEIDKESQKPFVEK.G               | 1            | Q8WU60_HUMA          |
| Q8WU60                                                                                            | 3             | 4.9883           | R.KETSGTQGIEGHLK.G                | 6            | Q8WU60_HUMA          |
| Q8WU60                                                                                            | 2             | 3.5624           | R.GGLRKPESHFSFENR.A               | 2            | Q8WU60_HUMA          |
| Q8WU60                                                                                            | 3             | 4.0485           | R.AEQQLQASPPGAAEGHLEKPVPEPQR.K    | 2            | Q8WU60_HUMA          |
| Q8WU60                                                                                            | 2             | 4.6173           | K.NLSSPSSYPVAVNK.G                | 4            | Q8WU60_HUMA          |
| Q8WU60                                                                                            | 2             | 3.6813           | K.GSPAPAVLAEER.A                  | 5            | Q8WU60_HUMA          |
| Q8WU60                                                                                            | 2             | 4.9225           | R.GGTQEPAPVPAEPFDNTTYK.N          | 1            | Q8WU60_HUMA          |
| Q8WU60                                                                                            | 3             | 4.0901           | K.TLLQKPHVDITDPEKPHQPK.K          | 2            | Q8WU60_HUMA          |
| <b><i>NADH dehydrogenase [ubiquinone] 1 alpha subcomplex subunit 2 - Homo sapiens (Human)</i></b> |               |                  |                                   |              |                      |

| <i>Accession No*</i>                                                                                        | <i>Charge</i> | <i>XC(Max)**</i> | <i>Peptide*</i>              | <i>TC***</i> | <i>Reference No*</i> |
|-------------------------------------------------------------------------------------------------------------|---------------|------------------|------------------------------|--------------|----------------------|
| O43678                                                                                                      | 2             | 3.4706           | R.ALENVLSGKA.-               | 3            | NDUA2_HUMAN          |
| O43678                                                                                                      | 2             | 3.5124           | R.YAFGQETNVPLNFSADQVTR.A     | 1            | NDUA2_HUMAN          |
| <b><i>NADH dehydrogenase [ubiquinone] 1 alpha subcomplex subunit 3 - Homo sapiens (Human)</i></b>           |               |                  |                              |              |                      |
| O95167                                                                                                      | 1             | 2.2202           | K.YSVM#INK.A                 | 1            | NDUA3_HUMAN          |
| <b><i>NADH dehydrogenase [ubiquinone] 1 alpha subcomplex subunit 4 - Homo sapiens (Human)</i></b>           |               |                  |                              |              |                      |
| O00483                                                                                                      | 2             | 3.3481           | K.FYSVNVLDYSK.L              | 2            | NDUA4_HUMAN          |
| <b><i>NADH dehydrogenase [ubiquinone] 1 alpha subcomplex subunit 7 - Homo sapiens (Human)</i></b>           |               |                  |                              |              |                      |
| O95182                                                                                                      | 2             | 2.9481           | K.PAESSAVAATEK.K             | 1            | NDUA7_HUMAN          |
| O95182                                                                                                      | 2             | 5.7817           | K.ALVSGKPAESSAVAATEK.K       | 3            | NDUA7_HUMAN          |
| O95182                                                                                                      | 3             | 5.8704           | K.ALVSGKPAESSAVAATEKK.A      | 4            | NDUA7_HUMAN          |
| O95182                                                                                                      | 2             | 2.9471           | K.KAVTPAPPIKR.W              | 2            | NDUA7_HUMAN          |
| <b><i>NADH dehydrogenase [ubiquinone] flavoprotein 2, mitochondrial precursor - Homo sapiens (Hum</i></b>   |               |                  |                              |              |                      |
| P19404                                                                                                      | 2             | 3.3809           | R.QNGWLPISAMNK.V             | 2            | NDUV2_HUMAN          |
| P19404                                                                                                      | 2             | 3.8116           | K.AAAVLPVLDLAQR.Q            | 4            | NDUV2_HUMAN          |
| P19404                                                                                                      | 2             | 2.8066           | R.DTPENNPDPDFDTPENYKR.I      | 1            | NDUV2_HUMAN          |
| <b><i>NADH dehydrogenase [ubiquinone] iron-sulfur protein 4, mitochondrial precursor - Homo sapiens</i></b> |               |                  |                              |              |                      |
| O43181                                                                                                      | 2             | 3.0815           | K.NGWSYDIEER.K               | 2            | NDUS4_HUMAN          |
| O43181                                                                                                      | 2             | 2.8991           | K.SYGANFSWNK.R               | 1            | NDUS4_HUMAN          |
| O43181                                                                                                      | 2             | 2.7786           | R.NNMQSGVNNTK.K              | 1            | NDUS4_HUMAN          |
| O43181                                                                                                      | 2             | 3.7218           | R.NNMQSGVNNTKK.W             | 2            | NDUS4_HUMAN          |
| <b><i>NADH dehydrogenase [ubiquinone] iron-sulfur protein 6, mitochondrial precursor - Homo sapiens</i></b> |               |                  |                              |              |                      |
| O75380                                                                                                      | 2             | 3.2982           | K.VHTGTQVYDDKDYRR.I          | 2            | NDUS6_HUMAN          |
| O75380                                                                                                      | 2             | 3.7883           | K.VYINLDKETK.T               | 3            | NDUS6_HUMAN          |
| O75380                                                                                                      | 3             | 4.0412           | R.QKEVNENFAIDLIAEQPVSEVETR.V | 2            | NDUS6_HUMAN          |
| <b><i>NADH dehydrogenase [ubiquinone] iron-sulfur protein 8, mitochondrial precursor - Homo sapiens</i></b> |               |                  |                              |              |                      |
| O00217                                                                                                      | 2             | 2.8939           | R.RYPSGEER.C                 | 1            | NDUS8_HUMAN          |
| <b><i>NADPH oxidase 5 - Homo sapiens (Human)</i></b>                                                        |               |                  |                              |              |                      |
| Q96PH1                                                                                                      | 2             | 2.7164           | K.NDMKAIGLQMALDLLANK.E       | 1            | NOX5_HUMAN           |
| <b><i>Nance-Horan syndrome protein - Homo sapiens (Human)</i></b>                                           |               |                  |                              |              |                      |
| Q6T4R5                                                                                                      | 2             | 2.7263           | R.ATTPSLPSVDNEFK.L           | 1            | NHS_HUMAN            |
| Q6T4R5                                                                                                      | 2             | 4.4264           | K.IIQYGGPDETLEQVQK.A         | 1            | NHS_HUMAN            |
| Q6T4R5                                                                                                      | 2             | 4.6146           | K.SPESESQTSQSES.R.A          | 3            | NHS_HUMAN            |
| <b><i>Nanos homolog 3 - Homo sapiens (Human)</i></b>                                                        |               |                  |                              |              |                      |
| P60323                                                                                                      | 2             | 2.7396           | R.LSPQPEPEPMLPDQK.R          | 1            | NANO3_HUMAN          |
| <b><i>Nascent polypeptide-associated complex subunit alpha - Homo sapiens (Human)</i></b>                   |               |                  |                              |              |                      |

| <i>Accession No*</i>                                                             | <i>Charge</i> | <i>XC(Max)**</i> | <i>Peptide*</i>                   | <i>TC***</i> | <i>Reference No*</i> |
|----------------------------------------------------------------------------------|---------------|------------------|-----------------------------------|--------------|----------------------|
| Q13765                                                                           | 3             | 4.7186           | K.SPASDTYIVFGEAKIEDLSQQAQLAAAEK.F | 3            | NACA_HUMAN           |
| Q13765                                                                           | 2             | 5.3162           | R.ALKNNNSNDIVNAIMELTM#.-          | 10           | NACA_HUMAN           |
| Q13765                                                                           | 2             | 5.2891           | R.ALKNNNSNDIVNAIM#ELTM#.-         | 8            | NACA_HUMAN           |
| Q13765                                                                           | 2             | 4.8768           | K.SPASDTYIVFGEAK.I                | 4            | NACA_HUMAN           |
| Q13765                                                                           | 2             | 4.063            | K.NNSNDIVNAIMELTM#.-              | 3            | NACA_HUMAN           |
| Q13765                                                                           | 2             | 3.346            | K.LGLRQVTGVTR.V                   | 2            | NACA_HUMAN           |
| Q13765                                                                           | 2             | 3.0429           | K.IEDLSQQAQLAAAEKFK.V             | 1            | NACA_HUMAN           |
| Q13765                                                                           | 3             | 6.1223           | K.IEDLSQQAQLAAAEK.F               | 15           | NACA_HUMAN           |
| Q13765                                                                           | 2             | 3.8084           | K.DIELVM#SQANVSR.A                | 1            | NACA_HUMAN           |
| Q13765                                                                           | 2             | 3.7455           | R.ALKNNNSNDIVNAIM#ELTM.-          | 3            | NACA_HUMAN           |
| <b><i>NEDD4-like E3 ubiquitin-protein ligase WWP2 - Homo sapiens (Human)</i></b> |               |                  |                                   |              |                      |
| O00308                                                                           | 2             | 3.3663           | R.DSSGTAVAPENR.H                  | 3            | WWP2_HUMAN           |
| <b><i>NEDD8 precursor - Homo sapiens (Human)</i></b>                             |               |                  |                                   |              |                      |
| Q15843                                                                           | 2             | 2.7709           | R.IKERVEEK.E                      | 1            | NEDD8_HUMAN          |
| Q15843                                                                           | 2             | 3.7198           | K.EIEIDIEPTDKVER.I                | 3            | NEDD8_HUMAN          |
| Q15843                                                                           | 2             | 4.4879           | K.ILGGSVLHLVLALR.G                | 1            | NEDD8_HUMAN          |
| Q15843                                                                           | 2             | 2.7074           | K.QMNDEKTAADYK.I                  | 1            | NEDD8_HUMAN          |
| Q15843                                                                           | 3             | 5.1279           | K.TLTGKEIEIDIEPTDKVER.I           | 7            | NEDD8_HUMAN          |
| <b><i>NEDD8 ultimate buster 1 - Homo sapiens (Human)</i></b>                     |               |                  |                                   |              |                      |
| Q9Y5A7                                                                           | 2             | 3.1494           | R.KNFQLEEEEQNEAKLK.E              | 1            | NUB1_HUMAN           |
| <b><i>Negative elongation factor E - Homo sapiens (Human)</i></b>                |               |                  |                                   |              |                      |
| P18615                                                                           | 2             | 4.0915           | K.SVWGSLAVQNSPK.G                 | 5            | NELFE_HUMAN          |
| <b><i>Neogenin precursor - Homo sapiens (Human)</i></b>                          |               |                  |                                   |              |                      |
| Q92859                                                                           | 2             | 3.2911           | R.TFTPFYFLVEPVDTLSVR.G            | 2            | NEO1_HUMAN           |
| <b><i>Nephronectin precursor - Homo sapiens (Human)</i></b>                      |               |                  |                                   |              |                      |
| Q6UXI9                                                                           | 2             | 2.7768           | R.QPSNDLFEIFEIER.G                | 1            | NPNT_HUMAN           |
| <b><i>Nesprin-2 - Homo sapiens (Human)</i></b>                                   |               |                  |                                   |              |                      |
| Q8WXH0                                                                           | 2             | 2.9891           | K.QLVASVSC*PELEGQIAK.L            | 1            | SYNE2_HUMAN          |
| <b><i>Nestin - Homo sapiens (Human)</i></b>                                      |               |                  |                                   |              |                      |
| P48681                                                                           | 2             | 3.5129           | R.SPEEVDKESQR.N                   | 4            | NEST_HUMAN           |
| P48681                                                                           | 2             | 4.1628           | R.LLEENQESLR.S                    | 3            | NEST_HUMAN           |
| P48681                                                                           | 2             | 6.0867           | R.NLEEEENLGKGEYQESLR.S            | 6            | NEST_HUMAN           |
| P48681                                                                           | 2             | 3.3948           | R.SLEDENKEAFR.S                   | 2            | NEST_HUMAN           |
| P48681                                                                           | 2             | 4.7467           | R.SLEEEGQELPQSADVQR.W             | 7            | NEST_HUMAN           |
| P48681                                                                           | 2             | 3.9451           | R.SLEEQDQETLR.T                   | 4            | NEST_HUMAN           |

| <i>Accession No*</i>                                    | <i>Charge</i> | <i>XC(Max)**</i> | <i>Peptide*</i>                    | <i>TC***</i> | <i>Reference No*</i> |
|---------------------------------------------------------|---------------|------------------|------------------------------------|--------------|----------------------|
| P48681                                                  | 2             | 2.9892           | R.SLEKENQEPLK.T                    | 2            | NEST_HUMAN           |
| P48681                                                  | 3             | 4.4479           | R.SLGAWNLENLRSPPEVDKESQR.N         | 2            | NEST_HUMAN           |
| P48681                                                  | 2             | 2.8699           | R.TLEKETQQR.R                      | 2            | NEST_HUMAN           |
| P48681                                                  | 3             | 4.8261           | K.SLDQEIARPLENENQEFLK.S            | 4            | NEST_HUMAN           |
| P48681                                                  | 2             | 4.0358           | R.GSPFQEEEGSALK.T                  | 1            | NEST_HUMAN           |
| P48681                                                  | 2             | 4.0927           | R.SLGAWNLENLR.S                    | 4            | NEST_HUMAN           |
| P48681                                                  | 3             | 4.8026           | K.ENQEPLRSPEVGDDEALRPLTK.E         | 1            | NEST_HUMAN           |
| P48681                                                  | 4             | 5.1552           | K.SQHVNGGVMNGLEQSEEVGQGMPLVSEGD    | 1            | NEST_HUMAN           |
| P48681                                                  | 2             | 2.8113           | R.EGDRESWSSGED.-                   | 1            | NEST_HUMAN           |
| P48681                                                  | 2             | 3.122            | K.EAVGQLKPTGK.E                    | 1            | NEST_HUMAN           |
| P48681                                                  | 2             | 3.2286           | K.EDTQTLQSLQK.E                    | 2            | NEST_HUMAN           |
| P48681                                                  | 2             | 3.8084           | K.SAGQENLETLK.S                    | 2            | NEST_HUMAN           |
| P48681                                                  | 4             | 5.4827           | K.SAGQENLETLKSPETQAPLWTPPEEINQGAMN | 1            | NEST_HUMAN           |
| P48681                                                  | 2             | 3.2247           | K.SLETEILESLK.S                    | 1            | NEST_HUMAN           |
| P48681                                                  | 2             | 2.9428           | K.DVEVVRPLEK.E                     | 2            | NEST_HUMAN           |
| P48681                                                  | 2             | 4.425            | K.TSWAGAPVHLGQQGFLK.F              | 2            | NEST_HUMAN           |
| P48681                                                  | 3             | 6.271            | R.EDKVPGLEIPSGM#EDAGPGADIIGVNGQG   | 1            | NEST_HUMAN           |
| P48681                                                  | 3             | 5.2124           | K.EAVGQLKPTGKEDTQTLQSLQK.E         | 3            | NEST_HUMAN           |
| <b><i>Netrin-4 precursor - Homo sapiens (Human)</i></b> |               |                  |                                    |              |                      |
| Q9HB63                                                  | 2             | 2.9996           | R.M#GNLALGR.K                      | 1            | NET4_HUMAN           |
| <b><i>Neudisin precursor - Homo sapiens (Human)</i></b> |               |                  |                                    |              |                      |
| Q9UMX5                                                  | 2             | 4.2205           | R.YGGEEDQPIYLAVK.G                 | 5            | NENF_HUMAN           |
| Q9UMX5                                                  | 3             | 6.9323           | K.MSLDPADLTHDTTGLTAKELEALDEVFTK.V  | 1            | NENF_HUMAN           |
| Q9UMX5                                                  | 3             | 4.8069           | R.GPPVRLFTEELAR.Y                  | 3            | NENF_HUMAN           |
| Q9UMX5                                                  | 2             | 3.0939           | R.GAPYNALTGKDSTR.G                 | 1            | NENF_HUMAN           |
| Q9UMX5                                                  | 2             | 2.825            | K.YPIVGYTAR.R                      | 4            | NENF_HUMAN           |
| Q9UMX5                                                  | 3             | 4.9754           | K.M#SLDPADLTHDTTGLTAKELEALDEVFTK.V | 2            | NENF_HUMAN           |
| Q9UMX5                                                  | 2             | 2.9259           | K.M#SLDPADLTHDTTGLTAK.E            | 1            | NENF_HUMAN           |
| Q9UMX5                                                  | 2             | 5.1658           | K.GVVFVDTSGKEFYGR.G                | 4            | NENF_HUMAN           |
| Q9UMX5                                                  | 2             | 4.0181           | K.AKYPIVGYTAR.R                    | 4            | NENF_HUMAN           |
| Q9UMX5                                                  | 2             | 3.2278           | K.ELEALDEVFTK.V                    | 1            | NENF_HUMAN           |
| <b><i>Neurabin-2 - Homo sapiens (Human)</i></b>         |               |                  |                                    |              |                      |
| Q96SB3                                                  | 2             | 3.0972           | R.KLQSLEQEK.G                      | 2            | NEB2_HUMAN           |
| Q96SB3                                                  | 2             | 3.8248           | R.SAYEAGIQALKPPDAPGPDEAPK.G        | 3            | NEB2_HUMAN           |
| Q96SB3                                                  | 3             | 3.9506           | R.FDSKPAPSAQPAPPPHPPSR.L           | 2            | NEB2_HUMAN           |

| <i>Accession No*</i>                                                                    | <i>Charge</i> | <i>XC(Max)**</i> | <i>Peptide*</i>                   | <i>TC***</i> | <i>Reference No*</i> |
|-----------------------------------------------------------------------------------------|---------------|------------------|-----------------------------------|--------------|----------------------|
| Q96SB3                                                                                  | 3             | 3.9681           | R.FNGSTEALDKLDADAVSPTVSQLSAVFEK.A | 1            | NEB2_HUMAN           |
| Q96SB3                                                                                  | 3             | 5.4354           | K.HAVTEAEIQQLKR.K                 | 3            | NEB2_HUMAN           |
| Q96SB3                                                                                  | 2             | 3.199            | K.EAAAVAPPER.G                    | 2            | NEB2_HUMAN           |
| Q96SB3                                                                                  | 2             | 4.0388           | K.AQLEQSVENKER.M                  | 2            | NEB2_HUMAN           |
| Q96SB3                                                                                  | 2             | 4.6344           | K.AQAAPEKEAAVAPPER.G              | 1            | NEB2_HUMAN           |
| Q96SB3                                                                                  | 2             | 2.8249           | K.TVTEGGAHR.D                     | 4            | NEB2_HUMAN           |
| Q96SB3                                                                                  | 2             | 3.356            | R.VLEESLAR.K                      | 2            | NEB2_HUMAN           |
| <b><i>Neural Wiskott-Aldrich syndrome protein - Homo sapiens (Human)</i></b>            |               |                  |                                   |              |                      |
| O00401                                                                                  | 1             | 2.7533           | K.VIYDFIEK.T                      | 2            | WASL_HUMAN           |
| O00401                                                                                  | 2             | 3.2653           | R.DALLDQIR.Q                      | 2            | WASL_HUMAN           |
| O00401                                                                                  | 2             | 2.7489           | K.AALLDQIR.E                      | 2            | WASL_HUMAN           |
| O00401                                                                                  | 2             | 3.9611           | R.FYGPQVNNISHTK.E                 | 1            | WASL_HUMAN           |
| <b><i>Neuroblast differentiation-associated protein AHNK - Homo sapiens (Human)</i></b> |               |                  |                                   |              |                      |
| Q09666                                                                                  | 3             | 7.288            | K.SKGHYEVTGSDDETGKLQGGVSLASK.K    | 3            | AHNK_HUMAN           |
| Q09666                                                                                  | 2             | 2.9205           | K.MPSMNIQTHK.I                    | 2            | AHNK_HUMAN           |
| Q09666                                                                                  | 3             | 4.7485           | K.MPTFSTPGAKGEGPDVHMTLPK.G        | 2            | AHNK_HUMAN           |
| Q09666                                                                                  | 2             | 3.8069           | K.MSLPDVLDLKGPK.M                 | 2            | AHNK_HUMAN           |
| Q09666                                                                                  | 2             | 3.1439           | K.MPSM#NIQTHK.I                   | 1            | AHNK_HUMAN           |
| Q09666                                                                                  | 3             | 5.5971           | K.SAKM#DIDVPDVEVQGPDWHLK.M        | 2            | AHNK_HUMAN           |
| Q09666                                                                                  | 2             | 2.751            | K.TPEM#IIQKPK.I                   | 1            | AHNK_HUMAN           |
| Q09666                                                                                  | 2             | 3.5266           | K.VDIDAPDVEVHDPDWHLK.M            | 3            | AHNK_HUMAN           |
| Q09666                                                                                  | 2             | 3.2095           | K.MPEMSIKPQK.I                    | 1            | AHNK_HUMAN           |
| Q09666                                                                                  | 3             | 4.5887           | K.VDIKAPDVEGQGLDWSLK.I            | 4            | AHNK_HUMAN           |
| Q09666                                                                                  | 2             | 4.1179           | K.MDAEVPDVNIEGPDAL.L              | 7            | AHNK_HUMAN           |
| Q09666                                                                                  | 3             | 4.9647           | K.VDIKAPDVEGQGLDWSLKIPK.M         | 4            | AHNK_HUMAN           |
| Q09666                                                                                  | 2             | 4.3145           | K.VDIDVPDVNLEAPEGK.L              | 5            | AHNK_HUMAN           |
| Q09666                                                                                  | 2             | 3.8724           | K.M#KGNVDISAPK.I                  | 3            | AHNK_HUMAN           |
| Q09666                                                                                  | 3             | 4.2485           | K.LKTDVDVSLPK.V                   | 2            | AHNK_HUMAN           |
| Q09666                                                                                  | 2             | 2.9086           | K.LNIKAPK.V                       | 1            | AHNK_HUMAN           |
| Q09666                                                                                  | 2             | 4.7298           | K.M#DAEVPDVNIEGPDAL.L             | 4            | AHNK_HUMAN           |
| Q09666                                                                                  | 3             | 4.1106           | K.M#DIDAPDVEVQGPDWHLK.M           | 1            | AHNK_HUMAN           |
| Q09666                                                                                  | 3             | 3.7478           | K.M#DIDVPDVEVQGPDWHLK.M           | 3            | AHNK_HUMAN           |
| Q09666                                                                                  | 3             | 4.0409           | K.MDIDVPDVEVQGPDWHLK.M            | 3            | AHNK_HUMAN           |
| Q09666                                                                                  | 3             | 3.8342           | K.M#KGDYDVTVPKVEGEIK.A            | 1            | AHNK_HUMAN           |
| Q09666                                                                                  | 2             | 4.1734           | K.MKGNVDISAPK.I                   | 4            | AHNK_HUMAN           |
| Q09666                                                                                  | 2             | 4.4713           | K.M#SLPDVLDLKGPK.M                | 4            | AHNK_HUMAN           |

| <i>Accession No*</i> | <i>Charge</i> | <i>XC(Max)**</i> | <i>Peptide*</i>                   | <i>TC***</i> | <i>Reference No*</i> |
|----------------------|---------------|------------------|-----------------------------------|--------------|----------------------|
| Q09666               | 3             | 4.0262           | K.VEGEM#KVPDVIKGP.K.V             | 1            | AHnk_HUMAN           |
| Q09666               | 2             | 4.721            | K.MDIDAPDVEVQGPDWHLK.M            | 3            | AHnk_HUMAN           |
| Q09666               | 2             | 4.1906           | K.VDINAPDVEVHGPDWHLK.M            | 2            | AHnk_HUMAN           |
| Q09666               | 2             | 3.0014           | K.MDVNVGDIDIEGPEGK.L              | 1            | AHnk_HUMAN           |
| Q09666               | 2             | 3.447            | K.MKGDYDVTVPK.V                   | 2            | AHnk_HUMAN           |
| Q09666               | 2             | 3.604            | K.M#KGDYDVTVPK.V                  | 3            | AHnk_HUMAN           |
| Q09666               | 2             | 4.377            | K.VKGEYDVTVPK.L                   | 6            | AHnk_HUMAN           |
| Q09666               | 2             | 5.0281           | K.LKGPQITGPSLEGDLGLK.G            | 6            | AHnk_HUMAN           |
| Q09666               | 2             | 4.5543           | R.VDIETPNLEGLTGP.R.L              | 1            | AHnk_HUMAN           |
| Q09666               | 3             | 6.9511           | R.SNSFSDEREFSGPSTPTGTLEFEGGEVSLEG | 1            | AHnk_HUMAN           |
| Q09666               | 2             | 5.1549           | R.GGVQVPAVDISSSLGGR.P             | 5            | AHnk_HUMAN           |
| Q09666               | 3             | 5.1523           | R.GPKVDVSAPDVEAHGPEWNLK.M         | 1            | AHnk_HUMAN           |
| Q09666               | 2             | 3.2272           | R.VSAPEVSVGHK.G                   | 4            | AHnk_HUMAN           |
| Q09666               | 1             | 2.5013           | R.EVDVNLPK.A                      | 2            | AHnk_HUMAN           |
| Q09666               | 2             | 3.2049           | R.EFSGPSTPTGTLEFEGGEVSLEGK.V      | 1            | AHnk_HUMAN           |
| Q09666               | 2             | 3.4684           | K.VSMPDVLNLKGP.K.L                | 4            | AHnk_HUMAN           |
| Q09666               | 2             | 4.9297           | K.VSAPGVQGDVKGPQVALK.G            | 4            | AHnk_HUMAN           |
| Q09666               | 2             | 3.2963           | K.VSAPGVQGDVK.G                   | 2            | AHnk_HUMAN           |
| Q09666               | 2             | 4.4744           | K.VNVEAPDVNLEGLGK.L               | 6            | AHnk_HUMAN           |
| Q09666               | 2             | 3.9495           | K.VEGEIKAPDVIK.G                  | 2            | AHnk_HUMAN           |
| Q09666               | 2             | 4.0394           | K.VKGGVDVTLPR.V                   | 4            | AHnk_HUMAN           |
| Q09666               | 2             | 4.3386           | K.VDISAPDVDVHGPDWHLK.M            | 3            | AHnk_HUMAN           |
| Q09666               | 2             | 4.0803           | K.VKGEYDMTVPK.L                   | 6            | AHnk_HUMAN           |
| Q09666               | 2             | 2.8518           | K.VKGDVDSVVPK.V                   | 1            | AHnk_HUMAN           |
| Q09666               | 3             | 3.7282           | K.VKGDMDVSVPKVEGEMK.V             | 1            | AHnk_HUMAN           |
| Q09666               | 3             | 3.9803           | K.VKGDMDVSVPK.V                   | 5            | AHnk_HUMAN           |
| Q09666               | 2             | 4.6192           | K.VGVEVPDVNIEGPEGK.L              | 9            | AHnk_HUMAN           |
| Q09666               | 1             | 4.8164           | K.VGGSGVNVNAK.G                   | 8            | AHnk_HUMAN           |
| Q09666               | 2             | 4.8274           | K.VESEIKVPDVELK.S                 | 1            | AHnk_HUMAN           |
| Q09666               | 3             | 3.9532           | K.VEGEMKVPDVIKGP.K.V              | 2            | AHnk_HUMAN           |
| Q09666               | 2             | 4.0723           | K.VEGEMKVPDVIK.G                  | 1            | AHnk_HUMAN           |
| Q09666               | 2             | 4.5998           | K.VEGEIKAPDVIKGP.K.V              | 1            | AHnk_HUMAN           |
| Q09666               | 2             | 4.1712           | K.VDVSAPDVEAHGPEWNLK.M            | 3            | AHnk_HUMAN           |
| Q09666               | 2             | 2.9306           | K.VDVEVPDVSLEGPEGK.L              | 1            | AHnk_HUMAN           |
| Q09666               | 2             | 3.8827           | K.VDTNAPDLSLEGPEGK.L              | 3            | AHnk_HUMAN           |
| Q09666               | 2             | 2.7311           | K.VKVPEVDVR.G                     | 1            | AHnk_HUMAN           |

| <i>Accession No*</i> | <i>Charge</i> | <i>XC(Max)**</i> | <i>Peptide*</i>                  | <i>TC***</i> | <i>Reference No*</i> |
|----------------------|---------------|------------------|----------------------------------|--------------|----------------------|
| Q09666               | 3             | 3.7483           | K.FSM#PGFKGEGPEVDM#NLPK.A        | 1            | AHNK_HUMAN           |
| Q09666               | 2             | 3.0688           | K.GEGPEVDVKLPK.A                 | 1            | AHNK_HUMAN           |
| Q09666               | 2             | 3.355            | K.GEGPDVHMTLPK.G                 | 3            | AHNK_HUMAN           |
| Q09666               | 2             | 2.9015           | K.GDVDVSPK.V                     | 1            | AHNK_HUMAN           |
| Q09666               | 2             | 2.7537           | K.GDISISGPK.V                    | 2            | AHNK_HUMAN           |
| Q09666               | 3             | 4.7967           | K.FSVSGAKGEETGIDVTLPTGEVTPGVSGDV | 2            | AHNK_HUMAN           |
| Q09666               | 2             | 3.6106           | K.FSMPGFKGEGPEVDVK.L             | 3            | AHNK_HUMAN           |
| Q09666               | 2             | 3.196            | K.FSMPGFKGEGPEVDMNLPK.A          | 1            | AHNK_HUMAN           |
| Q09666               | 2             | 3.6809           | K.FSMPGFKGEGPEVDM#NLPK.A         | 3            | AHNK_HUMAN           |
| Q09666               | 2             | 5.4794           | K.FSMPGFKAEGPEVDVNLPK.A          | 8            | AHNK_HUMAN           |
| Q09666               | 2             | 3.0542           | K.FSM#PSLKGEGPEVDVNLPK.A         | 1            | AHNK_HUMAN           |
| Q09666               | 2             | 3.7803           | K.FSM#PSLKGEGPEFDVNLK.A          | 3            | AHNK_HUMAN           |
| Q09666               | 2             | 3.0757           | K.FSM#PGFKGEGR.E                 | 1            | AHNK_HUMAN           |
| Q09666               | 2             | 2.728            | K.GEYDVTMPK.V                    | 1            | AHNK_HUMAN           |
| Q09666               | 2             | 3.8978           | K.FSM#PGFKGEGPEVDMNLPK.A         | 2            | AHNK_HUMAN           |
| Q09666               | 2             | 2.8663           | K.FKMPSMNIQTHK.I                 | 2            | AHNK_HUMAN           |
| Q09666               | 2             | 3.9041           | K.FSM#PGFKAEGPEVDVNLPK.A         | 5            | AHNK_HUMAN           |
| Q09666               | 3             | 3.8536           | K.FKMPEMNIKVPK.I                 | 1            | AHNK_HUMAN           |
| Q09666               | 3             | 3.716            | K.FKM#PDMHFK.A                   | 1            | AHNK_HUMAN           |
| Q09666               | 1             | 2.3114           | K.FGVSTGR.E                      | 2            | AHNK_HUMAN           |
| Q09666               | 1             | 2.3206           | K.FGTFGGLGSK.S                   | 2            | AHNK_HUMAN           |
| Q09666               | 3             | 4.4118           | K.ASLGSLEGEAEAEASSPK.G           | 3            | AHNK_HUMAN           |
| Q09666               | 1             | 3.594            | K.ANVDISAPK.V                    | 4            | AHNK_HUMAN           |
| Q09666               | 3             | 4.2456           | K.AEASIQAGAGDGEWESEVKLK.K        | 1            | AHNK_HUMAN           |
| Q09666               | 3             | 4.3783           | K.ADVDSGPKM#DAEVPDVNIEGPKA.L     | 1            | AHNK_HUMAN           |
| Q09666               | 2             | 3.055            | K.ADLGVSVPK.V                    | 8            | AHNK_HUMAN           |
| Q09666               | 2             | 4.6346           | K.ADIVSGPSVTDAPDLIDIEGPEGK.L     | 2            | AHNK_HUMAN           |
| Q09666               | 2             | 4.142            | R.ISMSEVDLNVAAPK.V               | 2            | AHNK_HUMAN           |
| Q09666               | 3             | 4.0962           | K.LKGEIDASVPELEGDLRGPQVDVK.G     | 1            | AHNK_HUMAN           |
| Q09666               | 2             | 3.2475           | K.FSM#PGFKGEGPEVDVK.L            | 2            | AHNK_HUMAN           |
| Q09666               | 2             | 4.0107           | K.IEGEMQVPDVIDIRGPK.V            | 2            | AHNK_HUMAN           |
| Q09666               | 3             | 5.4454           | K.LKGDVDVSLPEVEGEMKVPDVIK.G      | 3            | AHNK_HUMAN           |
| Q09666               | 2             | 4.8471           | K.ISMQDVLDSLGSPL.L               | 3            | AHNK_HUMAN           |
| Q09666               | 2             | 3.321            | K.ISMPDVGLNLKAPK.L               | 1            | AHNK_HUMAN           |
| Q09666               | 2             | 3.2335           | K.ISMPDVGLNLK.A                  | 2            | AHNK_HUMAN           |
| Q09666               | 2             | 3.0554           | K.ISMPDVLNLKGP.L                 | 2            | AHNK_HUMAN           |

| <i>Accession No*</i>                                                          | <i>Charge</i> | <i>XC(Max)**</i> | <i>Peptide*</i>                   | <i>TC***</i> | <i>Reference No*</i> |
|-------------------------------------------------------------------------------|---------------|------------------|-----------------------------------|--------------|----------------------|
| Q09666                                                                        | 2             | 3.1966           | K.ISMPDVDLNLK.G                   | 2            | AHnk_HUMAN           |
| Q09666                                                                        | 2             | 2.7923           | K.ISMPDVDLHMK.G                   | 1            | AHnk_HUMAN           |
| Q09666                                                                        | 2             | 2.7395           | K.ISMPDVDLHLKGPVVK.G              | 1            | AHnk_HUMAN           |
| Q09666                                                                        | 2             | 5.2217           | K.ISM#QDVDLSLGSFK.L               | 5            | AHnk_HUMAN           |
| Q09666                                                                        | 2             | 3.7047           | K.ISM#PDVDLNLKGPV.L               | 3            | AHnk_HUMAN           |
| Q09666                                                                        | 3             | 3.9836           | K.FKM#PEMNIKVPK.I                 | 1            | AHnk_HUMAN           |
| Q09666                                                                        | 3             | 3.9311           | K.ISM#PDVDLHVK.G                  | 1            | AHnk_HUMAN           |
| Q09666                                                                        | 2             | 5.144            | K.GGKPGTLIQAPQLEVSVPANIEGLEK.L    | 2            | AHnk_HUMAN           |
| Q09666                                                                        | 2             | 3.1046           | K.ISIPDVGLHLK.G                   | 1            | AHnk_HUMAN           |
| Q09666                                                                        | 1             | 2.1227           | K.GNVDISAPK.I                     | 2            | AHnk_HUMAN           |
| Q09666                                                                        | 2             | 3.4972           | K.GGVDVTLPR.V                     | 4            | AHnk_HUMAN           |
| Q09666                                                                        | 2             | 4.203            | K.GGVTGSPEASISGSK.G               | 3            | AHnk_HUMAN           |
| Q09666                                                                        | 2             | 4.5483           | K.GGVTGSPEASISGSKGDLK.S           | 5            | AHnk_HUMAN           |
| Q09666                                                                        | 3             | 5.4713           | K.GHYEVTGSDDDETGKLQSGVSLASK.K     | 2            | AHnk_HUMAN           |
| Q09666                                                                        | 2             | 3.4866           | K.LKGEIDASVPELEGLR.G              | 1            | AHnk_HUMAN           |
| Q09666                                                                        | 2             | 5.1951           | K.GKGGVTGSPEASISGSK.G             | 1            | AHnk_HUMAN           |
| Q09666                                                                        | 2             | 5.6308           | K.GPQITGPSLEGDLGLK.G              | 9            | AHnk_HUMAN           |
| Q09666                                                                        | 3             | 6.7492           | K.GSLGATGEIKGPTVGGGLPGIGVQGLEGNLQ | 3            | AHnk_HUMAN           |
| Q09666                                                                        | 2             | 5.9544           | K.GSRVDIETPNLEGLTGTGPR.L          | 3            | AHnk_HUMAN           |
| Q09666                                                                        | 2             | 3.2444           | K.IDVTAPDVSIEEPEK.L               | 1            | AHnk_HUMAN           |
| Q09666                                                                        | 2             | 3.9389           | K.IEGEM#QVPDVIDR.G                | 5            | AHnk_HUMAN           |
| Q09666                                                                        | 2             | 3.412            | K.IEGEM#QVPDVIDRGPV.V             | 2            | AHnk_HUMAN           |
| Q09666                                                                        | 2             | 4.1346           | K.IEGEMQVPDVIDR.G                 | 6            | AHnk_HUMAN           |
| Q09666                                                                        | 3             | 5.2579           | K.GHYEVTGSDDDETGKLQSGVSLASKK.S    | 4            | AHnk_HUMAN           |
| <b><i>Neuroblastoma breakpoint family member 7 - Homo sapiens (Human)</i></b> |               |                  |                                   |              |                      |
| P0C2Y1                                                                        | 2             | 2.9025           | K.QKFLVTQMGFLANQQNKYK.Y           | 1            | NBPF7_HUMAN          |
| P0C2Y1                                                                        | 2             | 2.9415           | R.EQLAEGC*RLAR.H                  | 2            | NBPF7_HUMAN          |
| <b><i>Neurogranin - Homo sapiens (Human)</i></b>                              |               |                  |                                   |              |                      |
| Q92686                                                                        | 2             | 4.9901           | R.KGPGPGGGAGVAR.G                 | 6            | NEUG_HUMAN           |
| <b><i>Neuromodulin - Homo sapiens (Human)</i></b>                             |               |                  |                                   |              |                      |
| P17677                                                                        | 3             | 5.3386           | K.ESARQDEGKEEPEADQEHA.-           | 1            | NEUM_HUMAN           |
| <b><i>Neutral alpha-glucosidase AB precursor - Homo sapiens (Human)</i></b>   |               |                  |                                   |              |                      |
| Q14697                                                                        | 2             | 4.6439           | K.DPAEGDGAQEETPR.D                | 2            | GANAB_HUMAN          |
| Q14697                                                                        | 2             | 3.3194           | K.MMDYLQSGGETPQTDVR.W             | 3            | GANAB_HUMAN          |
| Q14697                                                                        | 3             | 3.8442           | R.QYASLTGTQALPPLFSLGYHQR.W        | 1            | GANAB_HUMAN          |



| <i>Accession No*</i>                                                                     | <i>Charge</i> | <i>XC(Max)**</i> | <i>Peptide*</i>                    | <i>TC***</i> | <i>Reference No*</i> |
|------------------------------------------------------------------------------------------|---------------|------------------|------------------------------------|--------------|----------------------|
| Q14697                                                                                   | 3             | 5.5698           | R.VSQGSKDPAEGDGAQPEETPR.D          | 3            | GANAB_HUMAN          |
| <b><i>Neutral amino acid transporter A - Homo sapiens (Human)</i></b>                    |               |                  |                                    |              |                      |
| P43007                                                                                   | 3             | 4.2563           | K.SEEETSPLVTHQNPAGPVASAPELESK.E    | 1            | SATT_HUMAN           |
| P43007                                                                                   | 3             | 4.8905           | K.SEEETSPLVTHQNPAGPVASAPELESKESVL. | 1            | SATT_HUMAN           |
| <b><i>Neutral and basic amino acid transport protein rBAT - Homo sapiens (Human)</i></b> |               |                  |                                    |              |                      |
| Q07837                                                                                   | 3             | 4.2311           | R.GILGSQEPDFKGVQPYAGMPK.E          | 1            | SLC31_HUMAN          |
| <b><i>NEXN protein - Homo sapiens (Human)</i></b>                                        |               |                  |                                    |              |                      |
| Q7Z2X0                                                                                   | 2             | 2.8267           | K.RAEQEGDSSLITVVPVK.S              | 1            | Q7Z2X0_HUMAN         |
| <b><i>NFATC2-interacting protein - Homo sapiens (Human)</i></b>                          |               |                  |                                    |              |                      |
| Q8NCF5                                                                                   | 2             | 4.2809           | R.LVLDPGEAPLVPVYSGK.V              | 4            | NF2IP_HUMAN          |
| Q8NCF5                                                                                   | 2             | 2.746            | R.RLVLDPGEAPLVPVYSGK.V             | 1            | NF2IP_HUMAN          |
| Q8NCF5                                                                                   | 2             | 3.0395           | R.GAADEVEVEPEPPGPVSR.D             | 2            | NF2IP_HUMAN          |
| <b><i>NHS-like protein 1. - Homo sapiens (Human)</i></b>                                 |               |                  |                                    |              |                      |
| Q5SYE7                                                                                   | 2             | 4.1304           | K.DFAVEPAENVSEALR.A                | 1            | Q5SYE7_HUMA          |
| Q5SYE7                                                                                   | 3             | 3.8091           | R.SPGAPSAGEAEARSPSTTLPDSSPSR.K     | 1            | Q5SYE7_HUMA          |
| <b><i>Nibrin - Homo sapiens (Human)</i></b>                                              |               |                  |                                    |              |                      |
| O60934                                                                                   | 2             | 3.2835           | K.VQKQEEDVNVR.K                    | 1            | NBN_HUMAN            |
| O60934                                                                                   | 1             | 2.3331           | R.NYFQPSTK.K                       | 1            | NBN_HUMAN            |
| O60934                                                                                   | 2             | 2.8575           | R.ASQQQQTNSIR.N                    | 1            | NBN_HUMAN            |
| O60934                                                                                   | 2             | 2.7532           | K.TICALICGRPIVK.P                  | 1            | NBN_HUMAN            |
| O60934                                                                                   | 2             | 3.9893           | R.MDIETNDTFSDEAVPESSK.I            | 4            | NBN_HUMAN            |
| O60934                                                                                   | 2             | 3.9237           | K.TSSNNNSM#VSNTLAK.M               | 2            | NBN_HUMAN            |
| <b><i>Nicastrin precursor - Homo sapiens (Human)</i></b>                                 |               |                  |                                    |              |                      |
| Q92542                                                                                   | 1             | 2.1668           | R.LPRC*VRSTAR.L                    | 1            | NICA_HUMAN           |
| <b><i>Nidogen-1 precursor - Homo sapiens (Human)</i></b>                                 |               |                  |                                    |              |                      |
| P14543                                                                                   | 2             | 3.7326           | R.RVLFETDLVNPR.G                   | 1            | NID1_HUMAN           |
| P14543                                                                                   | 2             | 3.2945           | R.VLFETDLVNPR.G                    | 2            | NID1_HUMAN           |
| <b><i>Nipped-B-like protein - Homo sapiens (Human)</i></b>                               |               |                  |                                    |              |                      |
| Q6KC79                                                                                   | 2             | 3.0767           | R.LSSDDGDSSTM#R.N                  | 2            | NIPBL_HUMAN          |
| Q6KC79                                                                                   | 2             | 3.2227           | R.DKDGNTQETK.K                     | 3            | NIPBL_HUMAN          |
| <b><i>Nitric oxide synthase-interacting protein - Homo sapiens (Human)</i></b>           |               |                  |                                    |              |                      |
| Q9Y314                                                                                   | 2             | 2.8526           | K.ESAIVSRPLNPFTAK.A                | 1            | NOSIP_HUMAN          |
| Q9Y314                                                                                   | 2             | 3.4165           | K.VLPSFWIPSLTPEAK.A                | 3            | NOSIP_HUMAN          |
| <b><i>NK-tumor recognition protein - Homo sapiens (Human)</i></b>                        |               |                  |                                    |              |                      |
| P30414                                                                                   | 2             | 3.207            | R.DM#PVVTAEEPEPK.I                 | 2            | NKTR_HUMAN           |

| <i>Accession No*</i>                                                                   | <i>Charge</i> | <i>XC(Max)**</i> | <i>Peptide*</i>                | <i>TC***</i> | <i>Reference No*</i> |
|----------------------------------------------------------------------------------------|---------------|------------------|--------------------------------|--------------|----------------------|
| <b><i>NMDA receptor-regulated protein 2 - Homo sapiens (Human)</i></b>                 |               |                  |                                |              |                      |
| Q659A1                                                                                 | 2             | 2.7205           | K.M#QDELLKPISRK.V              | 1            | NARG2_HUMAN          |
| <b><i>Nonhistone chromosomal protein HMG-14 - Homo sapiens (Human)</i></b>             |               |                  |                                |              |                      |
| P05114                                                                                 | 2             | 4.4512           | K.TEESPASDEAGEKEAKSD.-         | 6            | HMG1_HUMAN           |
| P05114                                                                                 | 2             | 4.0671           | K.GKQAEVANQETK.E               | 2            | HMG1_HUMAN           |
| P05114                                                                                 | 2             | 4.5696           | R.KVSSAEGAAKEEPK.R             | 3            | HMG1_HUMAN           |
| P05114                                                                                 | 2             | 4.0621           | K.VSSAEGAAKEEPK.R              | 1            | HMG1_HUMAN           |
| P05114                                                                                 | 2             | 3.9322           | K.VSSAEGAAKEEPK.R              | 9            | HMG1_HUMAN           |
| P05114                                                                                 | 2             | 3.5734           | K.TEESPASDEAGEK.E              | 3            | HMG1_HUMAN           |
| P05114                                                                                 | 3             | 4.4948           | K.EDLPAENGETKTEESPASDEAGEK.E   | 1            | HMG1_HUMAN           |
| P05114                                                                                 | 3             | 6.0189           | K.GKQAEVANQETKEDLPAENGETK.T    | 1            | HMG1_HUMAN           |
| P05114                                                                                 | 2             | 3.2386           | K.QAEVANQETKEDLPAENGETK.T      | 1            | HMG1_HUMAN           |
| P05114                                                                                 | 2             | 4.2309           | K.TEESPASDEAGEKEAK.S           | 2            | HMG1_HUMAN           |
| <b><i>Nonhistone chromosomal protein HMG-17 - Homo sapiens (Human)</i></b>             |               |                  |                                |              |                      |
| P05204                                                                                 | 2             | 5.3446           | K.TDQAQKAEGAGDAK.-             | 39           | HMG2_HUMAN           |
| P05204                                                                                 | 2             | 4.551            | K.ADAGKEGNNPAENGDAK.T          | 7            | HMG2_HUMAN           |
| P05204                                                                                 | 3             | 6.2044           | K.ADAGKEGNNPAENGDAKTDQAQK.A    | 2            | HMG2_HUMAN           |
| P05204                                                                                 | 2             | 3.1626           | K.EGNNPAENGDAK.T               | 8            | HMG2_HUMAN           |
| P05204                                                                                 | 2             | 4.2786           | K.EGNNPAENGDAKTDQAQK.A         | 6            | HMG2_HUMAN           |
| P05204                                                                                 | 3             | 4.075            | K.EGNNPAENGDAKTDQAQKAEGAGDAK.- | 2            | HMG2_HUMAN           |
| P05204                                                                                 | 3             | 4.8284           | K.GKADAGKEGNNPAENGDAK.T        | 9            | HMG2_HUMAN           |
| <b><i>Non-POU domain-containing octamer-binding protein - Homo sapiens (Human)</i></b> |               |                  |                                |              |                      |
| Q15233                                                                                 | 2             | 3.1605           | R.RQQEEMMR.R                   | 3            | NONO_HUMAN           |
| Q15233                                                                                 | 2             | 3.6674           | R.MGQMAMGGAMGINNR.G            | 2            | NONO_HUMAN           |
| Q15233                                                                                 | 2             | 3.5019           | R.MGQM#AMGGAMGINNR.G           | 1            | NONO_HUMAN           |
| Q15233                                                                                 | 2             | 3.5928           | R.FGQAATMEGIGAIGGTPPAFNR.A     | 1            | NONO_HUMAN           |
| Q15233                                                                                 | 2             | 5.0353           | K.ALIEMEKQQDQVDR.N             | 4            | NONO_HUMAN           |
| Q15233                                                                                 | 2             | 3.3429           | R.FAQPGSFYEYAMR.W              | 3            | NONO_HUMAN           |
| <b><i>Nonsecretory ribonuclease precursor - Homo sapiens (Human)</i></b>               |               |                  |                                |              |                      |
| P10153                                                                                 | 3             | 4.4237           | R.RDPPQYPVVPVHLDR.I            | 1            | RNAS2_HUMAN          |
| <b><i>Nonspecific lipid-transfer protein - Homo sapiens (Human)</i></b>                |               |                  |                                |              |                      |
| P22307                                                                                 | 2             | 2.8075           | K.IGGIFAFK.V                   | 1            | NLTP_HUMAN           |
| P22307                                                                                 | 3             | 4.0944           | K.KLEEEGEQFVKK.I               | 1            | NLTP_HUMAN           |
| P22307                                                                                 | 2             | 4.3514           | K.LQNLQLQPGNAKL.-              | 4            | NLTP_HUMAN           |
| P22307                                                                                 | 2             | 3.3793           | K.M#NPQSAFFQGL.L               | 2            | NLTP_HUMAN           |

| <i>Accession No*</i>                                                                                            | <i>Charge</i> | <i>XC(Max)**</i> | <i>Peptide*</i>              | <i>TC***</i> | <i>Reference No*</i> |
|-----------------------------------------------------------------------------------------------------------------|---------------|------------------|------------------------------|--------------|----------------------|
| <b><i>Novel protein - Homo sapiens (Human)</i></b>                                                              |               |                  |                              |              |                      |
| Q5T992                                                                                                          | 2             | 3.7859           | K.WQNVSLESWNQPR.K            | 1            | Q5T992_HUMAN         |
| Q5T377                                                                                                          | 2             | 3.4734           | K.LLGSENDTGSPDFYTPR.T        | 3            | Q5T377_HUMAN         |
| Q5T992                                                                                                          | 3             | 4.0232           | K.KPVWEEELR.M                | 4            | Q5T992_HUMAN         |
| Q5T992                                                                                                          | 2             | 4.0672           | R.GGADSSDSQDSQQM#DAYVPR.H    | 3            | Q5T992_HUMAN         |
| <b><i>Novel protein similar to multidomain presynaptic cytomatrix protein Piccolo; piccolo - Homo sapie</i></b> |               |                  |                              |              |                      |
| Q5HYW2                                                                                                          | 2             | 3.292            | R.ISLQSQEEAEK.K              | 2            | Q5HYW2_HUMA          |
| <b><i>NSFL1 cofactor p47 - Homo sapiens (Human)</i></b>                                                         |               |                  |                              |              |                      |
| Q9UNZ2                                                                                                          | 2             | 3.7988           | K.SPNELVDDLK.G               | 5            | NSF1C_HUMAN          |
| Q9UNZ2                                                                                                          | 2             | 4.098            | R.DLIHDQDEDEEEEEGQR.F        | 2            | NSF1C_HUMAN          |
| Q9UNZ2                                                                                                          | 1             | 2.2232           | R.FYAGGSER.S                 | 1            | NSF1C_HUMAN          |
| Q9UNZ2                                                                                                          | 2             | 3.0233           | R.SGQQIVGPPR.K               | 1            | NSF1C_HUMAN          |
| <b><i>Nuclear autoantigen Sp-100 - Homo sapiens (Human)</i></b>                                                 |               |                  |                              |              |                      |
| P23497                                                                                                          | 3             | 4.5492           | R.VIGQDHFSESEEEEAPEASSGALR.S | 1            | SP100_HUMAN          |
| P23497                                                                                                          | 2             | 3.2943           | R.VVYNVLSELEK.T              | 1            | SP100_HUMAN          |
| P23497                                                                                                          | 2             | 5.3889           | R.SGLQLSLEQGTGENSFR.S        | 4            | SP100_HUMAN          |
| P23497                                                                                                          | 2             | 2.7176           | R.LLYDIVFK.H                 | 1            | SP100_HUMAN          |
| P23497                                                                                                          | 2             | 2.8716           | K.TFPFLEGLR.D                | 2            | SP100_HUMAN          |
| P23497                                                                                                          | 3             | 5.0445           | K.GFENVIHDKLPLQESEEEEREER.S  | 2            | SP100_HUMAN          |
| P23497                                                                                                          | 3             | 4.7169           | R.NKVEISNAIKK.T              | 4            | SP100_HUMAN          |
| <b><i>Nuclear factor 1 - Homo sapiens (Human)</i></b>                                                           |               |                  |                              |              |                      |
| Q8TA97                                                                                                          | 3             | 4.4433           | K.VAASHHPDRPPDPFSTL.-        | 1            | Q8TA97_HUMAN         |
| <b><i>Nuclear factor NF-kappa-B p100 subunit - Homo sapiens (Human)</i></b>                                     |               |                  |                              |              |                      |
| Q00653                                                                                                          | 2             | 3.2093           | R.DSGEEAAEPSAPSR.T           | 2            | NFKB2_HUMAN          |
| <b><i>Nuclear factor of activated T-cells, cytoplasmic 2 - Homo sapiens (Human)</i></b>                         |               |                  |                              |              |                      |
| Q13469                                                                                                          | 2             | 3.0216           | R.LSPGSYPTVIQQNATSQR.A       | 1            | NFAC2_HUMAN          |
| Q13469                                                                                                          | 3             | 3.942            | R.IEITPSHELIQAVGPLR.M        | 1            | NFAC2_HUMAN          |
| <b><i>Nuclear factor of activated T-cells, cytoplasmic 3 - Homo sapiens (Human)</i></b>                         |               |                  |                              |              |                      |
| Q12968                                                                                                          | 2             | 4.7342           | R.DM#SQISVSQGAGVSR.Q         | 3            | NFAC3_HUMAN          |
| Q12968                                                                                                          | 2             | 2.8067           | R.DMSQISVSQGAGVSR.Q          | 1            | NFAC3_HUMAN          |
| <b><i>Nuclear fragile X mental retardation-interacting protein 2 - Homo sapiens (Human)</i></b>                 |               |                  |                              |              |                      |
| Q7Z417                                                                                                          | 2             | 2.7381           | R.VDGSKPIWK.Y                | 1            | NUFP2_HUMAN          |
| Q7Z417                                                                                                          | 2             | 4.1395           | R.VLNGNQVVDTSLK.Q            | 2            | NUFP2_HUMAN          |
| Q7Z417                                                                                                          | 2             | 2.8726           | R.TSPQVLGSILK.S              | 1            | NUFP2_HUMAN          |
| Q7Z417                                                                                                          | 2             | 2.8691           | K.YETGPGGTSR.G               | 2            | NUFP2_HUMAN          |

| <i>Accession No*</i> | <i>Charge</i> | <i>XC(Max)**</i> | <i>Peptide*</i>                  | <i>TC***</i> | <i>Reference No*</i> |
|----------------------|---------------|------------------|----------------------------------|--------------|----------------------|
| Q7Z417               | 2             | 3.4805           | K.TGYGELNGNAGER.E                | 2            | NUFP2_HUMAN          |
| Q7Z417               | 2             | 2.8453           | K.QGLETFKPDYSEQK.G               | 1            | NUFP2_HUMAN          |
| Q7Z417               | 2             | 4.0703           | K.IMQQETSVPTLK.Q                 | 1            | NUFP2_HUMAN          |
| Q7Z417               | 2             | 3.6001           | K.IM#QQETSVPTLK.Q                | 1            | NUFP2_HUMAN          |
| Q7Z417               | 4             | 6.1227           | K.HASAVASKEDSWTLFKPPVFPVDNSSAK.I | 2            | NUFP2_HUMAN          |
| Q7Z417               | 3             | 4.2341           | K.EDSWTLFKPPVFPVDNSSAK.I         | 2            | NUFP2_HUMAN          |
| Q7Z417               | 2             | 3.4023           | K.GADNDGSGSESGYTTPK.K            | 3            | NUFP2_HUMAN          |
| Q7Z417               | 2             | 4.6162           | K.NLSSDEATNPISR.V                | 5            | NUFP2_HUMAN          |

***Nuclear mitotic apparatus protein 1 - Homo sapiens (Human)***

|        |   |        |                                  |   |             |
|--------|---|--------|----------------------------------|---|-------------|
| Q14980 | 3 | 4.5683 | R.KNSLISSLEEEVSILNR.Q            | 3 | NUMA1_HUMAN |
| Q14980 | 3 | 4.9131 | R.VAQEKDQLQEQLQALKESLK.V         | 2 | NUMA1_HUMAN |
| Q14980 | 2 | 3.1973 | R.QFLEVELDQAR.E                  | 1 | NUMA1_HUMAN |
| Q14980 | 2 | 3.8753 | R.LLQAETASNSAR.A                 | 2 | NUMA1_HUMAN |
| Q14980 | 2 | 2.8162 | R.HREELEQSK.Q                    | 2 | NUMA1_HUMAN |
| Q14980 | 2 | 2.7723 | R.ERKELEEER.A                    | 1 | NUMA1_HUMAN |
| Q14980 | 2 | 3.0174 | R.ELGELIPLR.Q                    | 2 | NUMA1_HUMAN |
| Q14980 | 2 | 4.0892 | R.DSAQTSVTQAQR.E                 | 2 | NUMA1_HUMAN |
| Q14980 | 2 | 4.3734 | R.AALMESQGGQQEER.G               | 3 | NUMA1_HUMAN |
| Q14980 | 2 | 3.806  | R.AALM#ESQGGQQEER.G              | 2 | NUMA1_HUMAN |
| Q14980 | 2 | 3.1947 | K.YVQELAAVR.A                    | 2 | NUMA1_HUMAN |
| Q14980 | 2 | 3.2137 | K.QAQLAQTLLQQEQASQGLR.H          | 1 | NUMA1_HUMAN |
| Q14980 | 2 | 3.8518 | K.LADDLSTLQEK.M                  | 3 | NUMA1_HUMAN |
| Q14980 | 3 | 7.8144 | K.EKQAQLAQTLLQQEQASQGLR.H        | 2 | NUMA1_HUMAN |
| Q14980 | 3 | 5.7769 | K.EKEHASGSGAQSEAAGR.T            | 3 | NUMA1_HUMAN |
| Q14980 | 3 | 3.8404 | K.EHASGSGAQSEAAGR.T              | 1 | NUMA1_HUMAN |
| Q14980 | 3 | 3.8942 | R.QELTSQAERAEEELGQELK.A          | 1 | NUMA1_HUMAN |
| Q14980 | 4 | 7.2172 | R.AERDSALETLLGQLEEKQELGHSQSALASA | 1 | NUMA1_HUMAN |

***Nuclear pore complex protein Nup153 - Homo sapiens (Human)***

|        |   |        |                      |   |             |
|--------|---|--------|----------------------|---|-------------|
| P49790 | 2 | 3.627  | K.QLSAQSYGVTSSSTAR.R | 2 | NU153_HUMAN |
| P49790 | 2 | 2.9899 | R.SGIDITDFQAK.R      | 2 | NU153_HUMAN |
| P49790 | 2 | 3.4742 | R.IPSIVSSPLNSPLDR.S  | 1 | NU153_HUMAN |
| P49790 | 3 | 4.4293 | K.RIPSIVSSPLNSPLDR.S | 2 | NU153_HUMAN |
| P49790 | 2 | 3.4796 | K.NVFSSSGTSFSGR.K    | 2 | NU153_HUMAN |
| P49790 | 2 | 3.0853 | K.NTSLPPLWSPEAER.S   | 1 | NU153_HUMAN |
| P49790 | 2 | 3.0188 | K.TSQLGDSPFYPGK.T    | 1 | NU153_HUMAN |

| <i>Accession No*</i>                                                                                       | <i>Charge</i> | <i>XC(Max)**</i> | <i>Peptide*</i>                     | <i>TC***</i> | <i>Reference No*</i> |
|------------------------------------------------------------------------------------------------------------|---------------|------------------|-------------------------------------|--------------|----------------------|
| <b><i>Nuclear pore complex protein Nup205 - Homo sapiens (Human)</i></b>                                   |               |                  |                                     |              |                      |
| Q92621                                                                                                     | 2             | 2.8645           | K.RCIANSLKALIQSR.R                  | 1            | NU205_HUMAN          |
| <b><i>Nuclear pore complex protein Nup93 - Homo sapiens (Human)</i></b>                                    |               |                  |                                     |              |                      |
| Q8N1F7                                                                                                     | 2             | 3.1025           | R.NLQEIQQAGER.L                     | 1            | NUP93_HUMAN          |
| <b><i>Nuclear pore complex protein Nup98-Nup96 precursor [Contains: Nuclear pore complex protein N</i></b> |               |                  |                                     |              |                      |
| P52948                                                                                                     | 2             | 4.2403           | K.NLNNSNLFSPVNR.D                   | 4            | NUP98_HUMAN          |
| P52948                                                                                                     | 2             | 2.918            | K.RISEACSLAQQSGDHR.L                | 1            | NUP98_HUMAN          |
| P52948                                                                                                     | 2             | 2.8518           | K.VGYITIPSMDDLAK.I                  | 1            | NUP98_HUMAN          |
| <b><i>Nuclear protein Hcc-1 - Homo sapiens (Human)</i></b>                                                 |               |                  |                                     |              |                      |
| P82979                                                                                                     | 2             | 3.6658           | K.GLSSDNKPMVNLDK.L                  | 1            | HCC1_HUMAN           |
| P82979                                                                                                     | 2             | 3.0114           | R.FNVPVSLESK.K                      | 1            | HCC1_HUMAN           |
| P82979                                                                                                     | 2             | 3.8764           | R.FNVPVSLESK.A                      | 2            | HCC1_HUMAN           |
| P82979                                                                                                     | 4             | 7.6614           | R.LQAYLEEHAEHEEANEEDVLGDETEEEETKPIE | 1            | HCC1_HUMAN           |
| P82979                                                                                                     | 2             | 2.9793           | K.SEDDEKLLK.K                       | 4            | HCC1_HUMAN           |
| P82979                                                                                                     | 2             | 3.7117           | K.ITSEIPQTER.M                      | 7            | HCC1_HUMAN           |
| P82979                                                                                                     | 2             | 3.8047           | K.LAELKQECLAR.G                     | 4            | HCC1_HUMAN           |
| P82979                                                                                                     | 2             | 2.9574           | K.SEDDEKLLK.R                       | 2            | HCC1_HUMAN           |
| <b><i>Nuclear protein localization protein 4 homolog - Homo sapiens (Human)</i></b>                        |               |                  |                                     |              |                      |
| Q8TAT6                                                                                                     | 2             | 3.2849           | K.TGEITASSNK.S                      | 1            | NPL4_HUMAN           |
| <b><i>Nuclear receptor coactivator 5 - Homo sapiens (Human)</i></b>                                        |               |                  |                                     |              |                      |
| Q9HCD5                                                                                                     | 2             | 2.7234           | R.DPYGFGDSR.D                       | 1            | NCOA5_HUMAN          |
| <b><i>Nuclear receptor coactivator 6 - Homo sapiens (Human)</i></b>                                        |               |                  |                                     |              |                      |
| Q14686                                                                                                     | 2             | 3.123            | R.GFDQQGLNPTTLK.A                   | 2            | NCOA6_HUMAN          |
| Q14686                                                                                                     | 2             | 2.7369           | R.SIVTTLVPSSELISAVPTTK.S            | 1            | NCOA6_HUMAN          |
| Q14686                                                                                                     | 2             | 3.4736           | R.VLSSTSEEDPEGVVK.F                 | 1            | NCOA6_HUMAN          |
| <b><i>Nuclear receptor interacting protein 2 - Homo sapiens (Human)</i></b>                                |               |                  |                                     |              |                      |
| A2RRE3                                                                                                     | 2             | 3.4674           | K.DSADLLPLDSLKR.L                   | 3            | A2RRE3_HUMA          |
| A2RRE3                                                                                                     | 2             | 3.2701           | R.TRGQEAQLR.D                       | 2            | A2RRE3_HUMA          |
| A2RRE3                                                                                                     | 2             | 4.0189           | K.DSADLLPLDSLK.R                    | 4            | A2RRE3_HUMA          |
| <b><i>Nuclear transcription factor Y subunit alpha - Homo sapiens (Human)</i></b>                          |               |                  |                                     |              |                      |
| P23511                                                                                                     | 3             | 6.8179           | K.EKDSPHMQDPNQADEEAM#TQIIR.V        | 2            | NFYA_HUMAN           |
| P23511                                                                                                     | 3             | 5.2707           | K.EKDSPHMQDPNQADEEAMTQIIR.V         | 1            | NFYA_HUMAN           |
| P23511                                                                                                     | 2             | 4.4131           | R.IPLPGAEM#LEEEPLYVNAK.Q            | 4            | NFYA_HUMAN           |
| P23511                                                                                                     | 3             | 5.0637           | K.EKDSPHM#QDPNQADEEAMTQIIR.V        | 1            | NFYA_HUMAN           |
| <b><i>Nuclear ubiquitous casein and cyclin-dependent kinases substrate - Homo sapiens (Human)</i></b>      |               |                  |                                     |              |                      |

| <i>Accession No*</i> | <i>Charge</i> | <i>XC(Max)**</i> | <i>Peptide*</i>                 | <i>TC***</i> | <i>Reference No*</i> |
|----------------------|---------------|------------------|---------------------------------|--------------|----------------------|
| Q9H1E3               | 2             | 2.8698           | K.TSTSPPEKSGDEGSEDEAPSGED.-     | 1            | NUCKS_HUMAN          |
| Q9H1E3               | 3             | 6.5825           | K.VVDYSQFQESDDADEDYGR.D         | 4            | NUCKS_HUMAN          |
| Q9H1E3               | 3             | 5.0403           | R.SGKNSQEDSEDEKDKVK.T           | 4            | NUCKS_HUMAN          |
| Q9H1E3               | 2             | 3.2652           | R.LKATVTPSPVK.G                 | 5            | NUCKS_HUMAN          |
| Q9H1E3               | 4             | 5.6338           | R.KVVDYSQFQESDDADEDYGRDSGPPTK.K | 5            | NUCKS_HUMAN          |
| Q9H1E3               | 2             | 7.6377           | R.KVVDYSQFQESDDADEDYGR.D        | 15           | NUCKS_HUMAN          |
| Q9H1E3               | 3             | 4.2143           | K.VVDYSQFQESDDADEDYGRDSGPPTK.I  | 1            | NUCKS_HUMAN          |
| Q9H1E3               | 3             | 4.9249           | K.TPSPKEEDEEPESPPEKK.T          | 6            | NUCKS_HUMAN          |
| Q9H1E3               | 3             | 4.3859           | K.TPSPKEEDEEPESPPEK.K           | 3            | NUCKS_HUMAN          |
| Q9H1E3               | 2             | 4.4953           | K.NSQEDSEDEKDKVK.T              | 14           | NUCKS_HUMAN          |
| Q9H1E3               | 2             | 2.937            | K.EEDEEPESPPEKK.T               | 1            | NUCKS_HUMAN          |
| Q9H1E3               | 2             | 2.8091           | K.ATVTPSPVKGK.G                 | 1            | NUCKS_HUMAN          |
| Q9H1E3               | 1             | 2.1079           | K.ATVTPSPVK.G                   | 1            | NUCKS_HUMAN          |
| Q9H1E3               | 3             | 5.1118           | K.VVDYSQFQESDDADEDYGRDSGPPTK.K  | 1            | NUCKS_HUMAN          |

***Nucleobindin-1 precursor - Homo sapiens (Human)***

|        |   |        |                           |   |             |
|--------|---|--------|---------------------------|---|-------------|
| Q02818 | 2 | 2.9275 | R.YLESLGEEQR.K            | 1 | NUCB1_HUMAN |
| Q02818 | 2 | 4.0209 | R.DLELLIQTATR.D           | 6 | NUCB1_HUMAN |
| Q02818 | 2 | 3.4614 | R.EKLQAANAEDIK.S          | 2 | NUCB1_HUMAN |
| Q02818 | 3 | 3.9048 | R.EKLQAANAEDIKSGK.L       | 1 | NUCB1_HUMAN |
| Q02818 | 2 | 3.3384 | R.ELDFVSHHVR.T            | 3 | NUCB1_HUMAN |
| Q02818 | 2 | 3.565  | R.ELQQAVLHM#EQR.K         | 2 | NUCB1_HUMAN |
| Q02818 | 2 | 4.5565 | R.ELQQAVLHMEQR.K          | 4 | NUCB1_HUMAN |
| Q02818 | 2 | 3.8842 | R.LPEVEVPQHL.-            | 4 | NUCB1_HUMAN |
| Q02818 | 2 | 3.8534 | R.LSQETEALGR.S            | 4 | NUCB1_HUMAN |
| Q02818 | 2 | 4.437  | R.LVTLEEFLLASTQRK.E       | 3 | NUCB1_HUMAN |
| Q02818 | 2 | 2.9108 | R.YEMLKEHER.R             | 2 | NUCB1_HUMAN |
| Q02818 | 2 | 5.5998 | K.MDAEQDPNVQVDHLNLLK.Q    | 5 | NUCB1_HUMAN |
| Q02818 | 2 | 3.2658 | R.YLESLGEEQRK.E           | 3 | NUCB1_HUMAN |
| Q02818 | 2 | 3.1539 | R.YLESLGEEQRKEAER.K       | 1 | NUCB1_HUMAN |
| Q02818 | 3 | 5.6392 | R.YLQEVIDVLETGDGHFR.E     | 4 | NUCB1_HUMAN |
| Q02818 | 4 | 4.798  | R.YLQEVIDVLETGDGHFREK.L   | 2 | NUCB1_HUMAN |
| Q02818 | 2 | 3.0862 | R.SQGRLEAQKR.E            | 5 | NUCB1_HUMAN |
| Q02818 | 2 | 3.0619 | K.EVWEELDGLDPNR.F         | 2 | NUCB1_HUMAN |
| Q02818 | 2 | 2.8644 | K.VNVPGSQAQLK.E           | 1 | NUCB1_HUMAN |
| Q02818 | 2 | 3.4082 | R.DLAQYDAAHHEEFK.R        | 1 | NUCB1_HUMAN |
| Q02818 | 3 | 4.9275 | K.AKM#DAEQDPNVQVDHLNLLK.Q | 2 | NUCB1_HUMAN |

| <i>Accession No*</i>                                                             | <i>Charge</i> | <i>XC(Max)**</i> | <i>Peptide*</i>                  | <i>TC***</i> | <i>Reference No*</i> |
|----------------------------------------------------------------------------------|---------------|------------------|----------------------------------|--------------|----------------------|
| Q02818                                                                           | 3             | 5.7097           | K.AKMDAEQDPNVQVDHLNLLK.Q         | 5            | NUCB1_HUMAN          |
| Q02818                                                                           | 2             | 3.0801           | K.APAAHPEGQLK.F                  | 2            | NUCB1_HUMAN          |
| Q02818                                                                           | 2             | 3.8278           | K.EVWEELDGLDPNRFNPK.T            | 3            | NUCB1_HUMAN          |
| Q02818                                                                           | 2             | 4.8325           | K.FHPDTPDDVPVPAPAGDQK.E          | 6            | NUCB1_HUMAN          |
| Q02818                                                                           | 3             | 4.6073           | K.FHPDTPDDVPVPAPAGDQKEVDTSEK.K   | 1            | NUCB1_HUMAN          |
| Q02818                                                                           | 3             | 3.8679           | K.KLLERLPEVEVPQHL.-              | 2            | NUCB1_HUMAN          |
| Q02818                                                                           | 2             | 4.1784           | K.LLERLPEVEVPQHL.-               | 8            | NUCB1_HUMAN          |
| Q02818                                                                           | 3             | 5.4003           | K.NVDTNQDRLVTLEEFLLASTQRK.E      | 2            | NUCB1_HUMAN          |
| Q02818                                                                           | 1             | 3.3644           | K.LQAANAEDIK.S                   | 4            | NUCB1_HUMAN          |
| Q02818                                                                           | 4             | 5.018            | K.AKMDAEQDPNVQVDHLNLLKQFEHLDPQNN | 1            | NUCB1_HUMAN          |
| Q02818                                                                           | 2             | 4.6044           | K.LQAANAEDIKSGK.L                | 3            | NUCB1_HUMAN          |
| Q02818                                                                           | 3             | 4.7551           | K.M#DAEQDPNVQVDHLNLLK.Q          | 1            | NUCB1_HUMAN          |
| Q02818                                                                           | 3             | 4.3035           | K.FHPDTPDDVPVPAPAGDQKEVDTSEKK.L  | 2            | NUCB1_HUMAN          |
| <b><i>Nucleobindin-2 precursor - Homo sapiens (Human)</i></b>                    |               |                  |                                  |              |                      |
| P80303                                                                           | 2             | 2.78             | R.LVTLEEFLLK.A                   | 3            | NUCB2_HUMAN          |
| P80303                                                                           | 3             | 4.0327           | R.MREHVM#NEVDTNKDR.L             | 1            | NUCB2_HUMAN          |
| P80303                                                                           | 2             | 5.6741           | R.MREHVMNEVDTNKDR.L              | 4            | NUCB2_HUMAN          |
| <b><i>Nucleolar MIF4G domain-containing protein 1 - Homo sapiens (Human)</i></b> |               |                  |                                  |              |                      |
| Q5C9Z4                                                                           | 3             | 3.9323           | R.SGAEAEASGHRQDTEER.A            | 2            | NOM1_HUMAN           |
| <b><i>Nucleolar phosphoprotein p130 - Homo sapiens (Human)</i></b>               |               |                  |                                  |              |                      |
| Q14978                                                                           | 2             | 2.9439           | R.GAAGDWGER.A                    | 1            | NOLC1_HUMAN          |
| Q14978                                                                           | 3             | 4.3466           | R.VVPSDLYPLVLGFLR.D              | 3            | NOLC1_HUMAN          |
| Q14978                                                                           | 2             | 3.4108           | R.VREEEIEVDSR.V                  | 1            | NOLC1_HUMAN          |
| Q14978                                                                           | 2             | 2.7292           | K.AALSLPAK.Q                     | 1            | NOLC1_HUMAN          |
| Q14978                                                                           | 2             | 3.0967           | R.VADNSFPAKR.G                   | 1            | NOLC1_HUMAN          |
| Q14978                                                                           | 2             | 3.0957           | R.VADNSFPAK.R                    | 5            | NOLC1_HUMAN          |
| Q14978                                                                           | 2             | 3.2419           | K.VAGGAAPSKPASAK.K               | 2            | NOLC1_HUMAN          |
| Q14978                                                                           | 2             | 2.9212           | K.SPAVKPAAAPK.Q                  | 2            | NOLC1_HUMAN          |
| Q14978                                                                           | 2             | 3.3665           | K.RGAAGDWGER.A                   | 2            | NOLC1_HUMAN          |
| Q14978                                                                           | 1             | 2.1375           | K.AAVVSK.S                       | 2            | NOLC1_HUMAN          |
| Q14978                                                                           | 2             | 3.6871           | K.NSSNKPAVTTK.S                  | 4            | NOLC1_HUMAN          |
| Q14978                                                                           | 2             | 2.7806           | R.DNQLSEVANK.F                   | 1            | NOLC1_HUMAN          |
| <b><i>Nucleolar protein 3 - Homo sapiens (Human)</i></b>                         |               |                  |                                  |              |                      |
| O60936                                                                           | 2             | 5.2421           | R.GVLTGPEYEALDALPDAER.R          | 6            | NOL3_HUMAN           |
| O60936                                                                           | 2             | 2.824            | R.LLLLQVGGK.G                    | 5            | NOL3_HUMAN           |

| <i>Accession No*</i>                                                      | <i>Charge</i> | <i>XC(Max)**</i> | <i>Peptide*</i>                   | <i>TC***</i> | <i>Reference No*</i> |
|---------------------------------------------------------------------------|---------------|------------------|-----------------------------------|--------------|----------------------|
| O60936                                                                    | 2             | 2.9245           | K.GEAACQELLR.C                    | 1            | NOL3_HUMAN           |
| O60936                                                                    | 3             | 4.9557           | R.LVETLQADSGLLLDALLAR.G           | 7            | NOL3_HUMAN           |
| <b><i>Nucleolar protein 5 - Homo sapiens (Human)</i></b>                  |               |                  |                                   |              |                      |
| Q9Y2X3                                                                    | 2             | 3.3895           | K.TYDPSGDSTLPTCSK.K               | 1            | NOL5_HUMAN           |
| Q9Y2X3                                                                    | 3             | 6.08             | K.VEEEEEEKVAEEEEETSVK.K           | 1            | NOL5_HUMAN           |
| <b><i>Nucleolar protein 7 - Homo sapiens (Human)</i></b>                  |               |                  |                                   |              |                      |
| Q9UMY1                                                                    | 2             | 3.1498           | R.KLLPDTILEK.L                    | 3            | NOL7_HUMAN           |
| <b><i>Nucleolar RNA helicase 2 - Homo sapiens (Human)</i></b>             |               |                  |                                   |              |                      |
| Q9NR30                                                                    | 3             | 4.0735           | K.KKAEPSEVDMNSPK.S                | 2            | DDX21_HUMAN          |
| Q9NR30                                                                    | 3             | 4.233            | K.KKEEPSQNDISPK.T                 | 1            | DDX21_HUMAN          |
| <b><i>Nucleoporin-like protein RIP - Homo sapiens (Human)</i></b>         |               |                  |                                   |              |                      |
| P52594                                                                    | 2             | 4.4588           | K.SLLGDSAPTLHLNK.G                | 2            | NUPL_HUMAN           |
| P52594                                                                    | 2             | 4.8239           | K.SSSADFGTFNTSQSHQTASAVSK.V       | 2            | NUPL_HUMAN           |
| P52594                                                                    | 3             | 6.7363           | K.AGLQTADKYAALANLDNIFSAAGQGGDQGSF | 2            | NUPL_HUMAN           |
| <b><i>Nucleosome assembly protein 1-like 1 - Homo sapiens (Human)</i></b> |               |                  |                                   |              |                      |
| P55209                                                                    | 2             | 4.7504           | K.NVDLLSDMVQEHDPEILK.H            | 1            | NP1L1_HUMAN          |
| P55209                                                                    | 2             | 3.1703           | K.YAVLYQPLFDK.R                   | 2            | NP1L1_HUMAN          |
| <b><i>Nucleosome assembly protein 1-like 4 - Homo sapiens (Human)</i></b> |               |                  |                                   |              |                      |
| Q99733                                                                    | 2             | 3.6289           | K.AAATAEEDPK.G                    | 3            | NP1L4_HUMAN          |
| Q99733                                                                    | 2             | 3.669            | K.LTDQVM#QNPR.V                   | 2            | NP1L4_HUMAN          |
| Q99733                                                                    | 2             | 4.6234           | K.LTDQVMQNPR.V                    | 3            | NP1L4_HUMAN          |
| Q99733                                                                    | 3             | 4.5151           | K.NASNTEKLTQVMQNPR.V              | 3            | NP1L4_HUMAN          |
| Q99733                                                                    | 2             | 2.746            | K.QVPNESFFNFFNPLK.A               | 1            | NP1L4_HUMAN          |
| Q99733                                                                    | 2             | 3.3538           | R.KYAALYQPLFDK.R                  | 2            | NP1L4_HUMAN          |
| Q99733                                                                    | 3             | 5.0399           | R.LDNPHTPSSYIETLPK.A              | 5            | NP1L4_HUMAN          |
| Q99733                                                                    | 2             | 3.2605           | R.VLAALQER.L                      | 1            | NP1L4_HUMAN          |
| <b><i>Nucleosome assembly protein 1-like 5 - Homo sapiens (Human)</i></b> |               |                  |                                   |              |                      |
| Q96NT1                                                                    | 2             | 4.1063           | K.NDFIESLPNSVK.C                  | 5            | Q96NT1_HUMA          |
| Q96NT1                                                                    | 2             | 3.0825           | K.FDKEFQALEK.K                    | 1            | Q96NT1_HUMA          |
| Q96NT1                                                                    | 3             | 4.8591           | K.FDKEFQALEKK.Y                   | 2            | Q96NT1_HUMA          |
| Q96NT1                                                                    | 3             | 4.1796           | K.HDDAHAEM#PDDAKK.-               | 1            | Q96NT1_HUMA          |
| <b><i>NudC domain-containing protein 2 - Homo sapiens (Human)</i></b>     |               |                  |                                   |              |                      |
| Q8WVJ2                                                                    | 2             | 2.72             | K.GGPDFSNLEK.-                    | 1            | NUDC2_HUMAN          |
| <b><i>OCIA domain-containing protein 2 - Homo sapiens (Human)</i></b>     |               |                  |                                   |              |                      |
| Q56VL3                                                                    | 2             | 3.2722           | K.HGLSEKGDSPAS.-                  | 2            | Q56VL3_HUMAN         |



| <i>Accession No*</i>                                                      | <i>Charge</i> | <i>XC(Max)**</i> | <i>Peptide*</i>                | <i>TC***</i> | <i>Reference No*</i> |
|---------------------------------------------------------------------------|---------------|------------------|--------------------------------|--------------|----------------------|
| <b><i>Opioid growth factor receptor - Homo sapiens (Human)</i></b>        |               |                  |                                |              |                      |
| Q9NZT2                                                                    | 2             | 3.918            | R.DADAGDEDEESEEP.R.A           | 6            | OGFR_HUMAN           |
| <b><i>Optineurin - Homo sapiens (Human)</i></b>                           |               |                  |                                |              |                      |
| Q96CV9                                                                    | 2             | 4.3032           | R.AVLKELSEKLELAEK.A            | 1            | OPTN_HUMAN           |
| Q96CV9                                                                    | 2             | 3.7106           | R.TSDSDQQAYLVQR.G              | 5            | OPTN_HUMAN           |
| Q96CV9                                                                    | 2             | 3.3033           | R.SSEDPTDDSR.L                 | 2            | OPTN_HUMAN           |
| Q96CV9                                                                    | 2             | 2.7295           | R.QSLMEMQSR.H                  | 1            | OPTN_HUMAN           |
| Q96CV9                                                                    | 2             | 4.3396           | R.MAEGEAEGSVKEIK.H             | 2            | OPTN_HUMAN           |
| Q96CV9                                                                    | 1             | 3.5566           | R.MAEGEAEGSVK.E                | 4            | OPTN_HUMAN           |
| Q96CV9                                                                    | 2             | 2.7792           | K.LSEAELM#K.K                  | 1            | OPTN_HUMAN           |
| Q96CV9                                                                    | 2             | 2.9156           | R.M#AEGEAEGSVK.E               | 1            | OPTN_HUMAN           |
| Q96CV9                                                                    | 2             | 4.1926           | R.LQAEKADLLGIVSELQLK.L         | 2            | OPTN_HUMAN           |
| Q96CV9                                                                    | 2             | 3.5469           | R.LMALSHENEKLEELGK.L           | 1            | OPTN_HUMAN           |
| Q96CV9                                                                    | 2             | 3.043            | R.LMALSHENEK.L                 | 1            | OPTN_HUMAN           |
| Q96CV9                                                                    | 3             | 4.8541           | R.KNSAIPSELNEKQELVYTNK.K       | 2            | OPTN_HUMAN           |
| Q96CV9                                                                    | 3             | 3.7669           | R.AQMEVYCSDFAER.A              | 1            | OPTN_HUMAN           |
| Q96CV9                                                                    | 2             | 3.7021           | R.AEAEQEKDQLR.T                | 2            | OPTN_HUMAN           |
| Q96CV9                                                                    | 2             | 2.8432           | K.TIEELTRK.E                   | 1            | OPTN_HUMAN           |
| Q96CV9                                                                    | 3             | 4.0025           | K.QTIKQEEDELETMTILR.A          | 1            | OPTN_HUMAN           |
| Q96CV9                                                                    | 3             | 4.1813           | K.QLQMDQEMKQTIKQEEDELETMTILR.A | 2            | OPTN_HUMAN           |
| Q96CV9                                                                    | 2             | 2.7682           | K.NSAIPSELNEKQELVYTNK.K        | 1            | OPTN_HUMAN           |
| Q96CV9                                                                    | 2             | 2.9576           | K.LSEAELMK.K                   | 1            | OPTN_HUMAN           |
| Q96CV9                                                                    | 2             | 2.7119           | K.LLQEHNNALK.T                 | 1            | OPTN_HUMAN           |
| Q96CV9                                                                    | 2             | 4.7427           | K.GRFEELSAWTEK.Q               | 3            | OPTN_HUMAN           |
| Q96CV9                                                                    | 2             | 3.3656           | K.ELSEKLELAEK.A                | 1            | OPTN_HUMAN           |
| Q96CV9                                                                    | 2             | 3.4721           | K.LTVLQMTTHNK.L                | 2            | OPTN_HUMAN           |
| <b><i>Organic-cation transporter-like 3 - Homo sapiens (Human)</i></b>    |               |                  |                                |              |                      |
| Q9Y226                                                                    | 2             | 2.7593           | R.WLLTRGRMDEAIQLIQK.A          | 1            | ORCT3_HUMAN          |
| <b><i>Origin recognition complex subunit 2 - Homo sapiens (Human)</i></b> |               |                  |                                |              |                      |
| Q13416                                                                    | 2             | 2.909            | R.AQLLVNPK.K                   | 1            | ORC2_HUMAN           |
| <b><i>Osteoclast-stimulating factor 1 - Homo sapiens (Human)</i></b>      |               |                  |                                |              |                      |
| Q92882                                                                    | 2             | 2.866            | R.ALYTFEPR.T                   | 1            | OSTF1_HUMAN          |
| Q92882                                                                    | 2             | 3.8481           | K.GYADIVQLLLAK.G               | 2            | OSTF1_HUMAN          |
| <b><i>Osteopontin precursor - Homo sapiens (Human)</i></b>                |               |                  |                                |              |                      |
| P10451                                                                    | 2             | 2.8706           | R.ISHELDSASSEVN.-              | 1            | OSTP_HUMAN           |

| <i>Accession No*</i>                                                                | <i>Charge</i> | <i>XC(Max)**</i> | <i>Peptide*</i>              | <i>TC***</i> | <i>Reference No*</i> |
|-------------------------------------------------------------------------------------|---------------|------------------|------------------------------|--------------|----------------------|
| P10451                                                                              | 3             | 4.7789           | K.ANDESNEHSDVIDSQELSK.V      | 1            | OSTP_HUMAN           |
| <b><i>OTTHUMP00000017057 - Homo sapiens (Human)</i></b>                             |               |                  |                              |              |                      |
| Q5TFE7                                                                              | 2             | 2.7951           | K.AGQEDAPPSTK.G              | 1            | Q5TFE7_HUMA          |
| <b><i>OTTHUMP00000028696 - Homo sapiens (Human)</i></b>                             |               |                  |                              |              |                      |
| Q5W189                                                                              | 2             | 5.2831           | K.LASSDTGESDQSSTETDSTVK.S    | 10           | Q5W189_HUMA          |
| <b><i>OTU domain-containing protein 4 - Homo sapiens (Human)</i></b>                |               |                  |                              |              |                      |
| Q01804                                                                              | 2             | 4.6438           | K.TAADVVSPGANSVDSR.V         | 2            | OTUD4_HUMAN          |
| Q01804                                                                              | 2             | 3.9571           | R.QHAFSSHSSGSQSQK.F          | 1            | OTUD4_HUMAN          |
| <b><i>Oxidation resistance protein 1 - Homo sapiens (Human)</i></b>                 |               |                  |                              |              |                      |
| Q8N573                                                                              | 2             | 3.6773           | K.FDTPNELVQLNK.L             | 2            | OXR1_HUMAN           |
| Q8N573                                                                              | 2             | 3.4546           | K.MTGSNTEEDSR.I              | 2            | OXR1_HUMAN           |
| Q8N573                                                                              | 2             | 3.7442           | K.SSGASSESQTVNQAEVESLTVK.S   | 1            | OXR1_HUMAN           |
| Q8N573                                                                              | 2             | 4.1777           | R.DAGNDSASTAPR.S             | 3            | OXR1_HUMAN           |
| <b><i>Oxysterol-binding protein-related protein 10 - Homo sapiens (Human)</i></b>   |               |                  |                              |              |                      |
| Q9BXB5                                                                              | 2             | 4.0842           | R.AVQGTGGGGSSNSSR.S          | 5            | OSB10_HUMAN          |
| <b><i>P37 AUF1 - Homo sapiens (Human)</i></b>                                       |               |                  |                              |              |                      |
| Q12771                                                                              | 2             | 4.1864           | K.IDASKNEEDEGK.M             | 4            | Q12771_HUMAN         |
| Q12771                                                                              | 3             | 5.8837           | K.IDASKNEEDEGKMFIGGLSWDTTK.K | 2            | Q12771_HUMAN         |
| <b><i>Palmdelphin - Homo sapiens (Human)</i></b>                                    |               |                  |                              |              |                      |
| Q9NP74                                                                              | 2             | 3.8446           | K.EINEEKEDDEQNR.K            | 1            | PALMD_HUMAN          |
| Q9NP74                                                                              | 2             | 3.3899           | K.EINEEKEDDEQNRK.A           | 2            | PALMD_HUMAN          |
| Q9NP74                                                                              | 2             | 3.3335           | K.IQEEISQKR.L                | 1            | PALMD_HUMAN          |
| Q9NP74                                                                              | 3             | 4.0219           | K.SPTEYHEPVYANPFYRPTTPQR.E   | 2            | PALMD_HUMAN          |
| Q9NP74                                                                              | 2             | 3.0863           | K.TGESTVLSSIPLPSDDFKGTGIK.V  | 1            | PALMD_HUMAN          |
| Q9NP74                                                                              | 2             | 3.6683           | R.AEESIEDIYANIPDLPK.S        | 2            | PALMD_HUMAN          |
| Q9NP74                                                                              | 2             | 2.7265           | R.SVKVEREER.A                | 1            | PALMD_HUMAN          |
| <b><i>Pantothenate kinase 2, mitochondrial precursor - Homo sapiens (Human)</i></b> |               |                  |                              |              |                      |
| Q9BZ23                                                                              | 2             | 4.4517           | R.ASATSVSSAGEQAAGDPEGR.R     | 4            | PANK2_HUMAN          |
| <b><i>Paralemmin - Homo sapiens (Human)</i></b>                                     |               |                  |                              |              |                      |
| O75781                                                                              | 3             | 4.7627           | R.KTEVVMNSQQTPVGTGPK.D       | 2            | PALM_HUMAN           |
| O75781                                                                              | 2             | 3.1189           | R.WLLEGTSSASEGDEDLRR.Q       | 1            | PALM_HUMAN           |
| O75781                                                                              | 2             | 2.8778           | R.APAPSPAKEER.K              | 1            | PALM_HUMAN           |
| O75781                                                                              | 2             | 3.5786           | R.VLSSTLLPR.Q                | 1            | PALM_HUMAN           |
| O75781                                                                              | 3             | 3.9682           | R.LLEDVSRLEKEIEVLER.G        | 2            | PALM_HUMAN           |
| <b><i>Paraspeckle component 1 - Homo sapiens (Human)</i></b>                        |               |                  |                              |              |                      |

| <i>Accession No*</i>                                                   | <i>Charge</i> | <i>XC(Max)**</i> | <i>Peptide*</i>                     | <i>TC***</i> | <i>Reference No*</i> |
|------------------------------------------------------------------------|---------------|------------------|-------------------------------------|--------------|----------------------|
| Q8WXF1                                                                 | 3             | 4.9781           | K.NLSPVVSNELLEQAFSQFGPVEK.A         | 1            | PSPC1_HUMAN          |
| Q8WXF1                                                                 | 2             | 4.4852           | R.FAQPQTFFEFYASR.W                  | 2            | PSPC1_HUMAN          |
| Q8WXF1                                                                 | 3             | 5.0586           | R.TGSETPQAPM#SGVGPVSGGPGGFGR.G      | 2            | PSPC1_HUMAN          |
| <b><i>Parathyrosin - Homo sapiens (Human)</i></b>                      |               |                  |                                     |              |                      |
| P20962                                                                 | 2             | 4.571            | K.SVEAAAELSAKDLK.E                  | 2            | PTMS_HUMAN           |
| P20962                                                                 | 1             | 4.3814           | K.SVEAAAELSAK.D                     | 116          | PTMS_HUMAN           |
| <b><i>Parvalbumin alpha - Homo sapiens (Human)</i></b>                 |               |                  |                                     |              |                      |
| P20472                                                                 | 2             | 2.7407           | K.FFQMVGGLK.K                       | 1            | PRVA_HUMAN           |
| <b><i>PC4 and SFRS1-interacting protein - Homo sapiens (Human)</i></b> |               |                  |                                     |              |                      |
| O75475                                                                 | 2             | 3.6766           | K.NMFLVGEGDSVITQVLNK.S              | 2            | PSIP1_HUMAN          |
| <b><i>PCDH12 protein - Homo sapiens (Human)</i></b>                    |               |                  |                                     |              |                      |
| Q7Z738                                                                 | 2             | 3.0919           | R.NQGNQGAPAESR.E                    | 1            | Q7Z738_HUMAN         |
| <b><i>PDZ and LIM domain protein 1 - Homo sapiens (Human)</i></b>      |               |                  |                                     |              |                      |
| O00151                                                                 | 2             | 4.0535           | R.SAMPFTASPASSTTAR.V                | 7            | PDLI1_HUMAN          |
| O00151                                                                 | 3             | 3.9002           | R.SEHKVWSPLVTEEGK.R                 | 1            | PDLI1_HUMAN          |
| O00151                                                                 | 2             | 4.5448           | R.SAM#PFTASPASSTTAR.V               | 10           | PDLI1_HUMAN          |
| O00151                                                                 | 4             | 6.8904           | K.TAASGVEANSRPLDHAQPPSSLVIDKESEVY   | 4            | PDLI1_HUMAN          |
| O00151                                                                 | 2             | 3.1197           | K.VWSPLVTEEGK.R                     | 3            | PDLI1_HUMAN          |
| O00151                                                                 | 3             | 4.6183           | R.ERVTPPEGYEVVTVFPK.-               | 4            | PDLI1_HUMAN          |
| O00151                                                                 | 2             | 2.7781           | K.VWSPLVTEEGK.R                     | 1            | PDLI1_HUMAN          |
| O00151                                                                 | 2             | 3.7412           | K.VAASIGNAQK.L                      | 5            | PDLI1_HUMAN          |
| O00151                                                                 | 2             | 5.7295           | K.MNLASEPQEVLHIGSAHNR.S             | 2            | PDLI1_HUMAN          |
| O00151                                                                 | 3             | 4.2241           | K.MLQEKQELNEPPK.Q                   | 1            | PDLI1_HUMAN          |
| O00151                                                                 | 3             | 4.1388           | K.M#NLASEPQEVLHIGSAHNR.S            | 1            | PDLI1_HUMAN          |
| O00151                                                                 | 2             | 3.8339           | K.GHFFVEDQIYCEK.H                   | 6            | PDLI1_HUMAN          |
| O00151                                                                 | 2             | 4.2024           | K.DFEQPLAISR.V                      | 4            | PDLI1_HUMAN          |
| O00151                                                                 | 2             | 4.8616           | R.LVGGKDFEQPLAISR.V                 | 7            | PDLI1_HUMAN          |
| O00151                                                                 | 2             | 3.6396           | K.GCTDNLTTLVAR.S                    | 2            | PDLI1_HUMAN          |
| <b><i>PDZ and LIM domain protein 2 - Homo sapiens (Human)</i></b>      |               |                  |                                     |              |                      |
| Q96JY6                                                                 | 4             | 5.0896           | K.AKDADLRPGDIIVAINGESAEGMLHAEAQSK.I | 2            | PDLI2_HUMAN          |
| Q96JY6                                                                 | 3             | 4.5464           | R.AGSPFSPPPSSSLTGEAAISR.S           | 6            | PDLI2_HUMAN          |
| Q96JY6                                                                 | 2             | 4.3791           | R.SFQSLACSPGLPAADR.L                | 2            | PDLI2_HUMAN          |
| Q96JY6                                                                 | 2             | 4.1606           | R.SQATSPGQTNGDSSLEVLATR.F           | 5            | PDLI2_HUMAN          |
| Q96JY6                                                                 | 2             | 3.0813           | R.SSYSSPTSLSPR.A                    | 1            | PDLI2_HUMAN          |
| Q96JY6                                                                 | 2             | 3.4653           | R.TYTESQSSLR.S                      | 3            | PDLI2_HUMAN          |

| <i>Accession No*</i>                                                  | <i>Charge</i> | <i>XC(Max)**</i> | <i>Peptide*</i>                  | <i>TC***</i> | <i>Reference No*</i> |
|-----------------------------------------------------------------------|---------------|------------------|----------------------------------|--------------|----------------------|
| <b><i>PDZ and LIM domain protein 3 - Homo sapiens (Human)</i></b>     |               |                  |                                  |              |                      |
| Q53GG5                                                                | 2             | 3.7291           | R.VLQGMVDDGSDDRPAQTR.S           | 3            | PDLI3_HUMAN          |
| <b><i>PDZ and LIM domain protein 5 - Homo sapiens (Human)</i></b>     |               |                  |                                  |              |                      |
| Q96HC4                                                                | 1             | 2.1572           | K.TAVNVPR.Q                      | 1            | PDLI5_HUMAN          |
| Q96HC4                                                                | 2             | 3.9634           | R.ASAAPKPEPVPVQKGEPK.E           | 2            | PDLI5_HUMAN          |
| Q96HC4                                                                | 2             | 3.3618           | K.VTSTNNM#AYNK.A                 | 2            | PDLI5_HUMAN          |
| Q96HC4                                                                | 2             | 4.0771           | K.EVVKVPITSPAASK.V               | 7            | PDLI5_HUMAN          |
| Q96HC4                                                                | 3             | 3.9587           | K.APRPFGSVSSPK.V                 | 1            | PDLI5_HUMAN          |
| Q96HC4                                                                | 2             | 3.6986           | K.VTSTNNMAYNK.A                  | 4            | PDLI5_HUMAN          |
| <b><i>PDZ and LIM domain protein 7 - Homo sapiens (Human)</i></b>     |               |                  |                                  |              |                      |
| Q9NR12                                                                | 2             | 3.1376           | R.YTFAPSVSLNK.T                  | 3            | PDLI7_HUMAN          |
| Q9NR12                                                                | 2             | 4.065            | K.VVLEGPAPWGFR.L                 | 4            | PDLI7_HUMAN          |
| Q9NR12                                                                | 2             | 2.8357           | R.AQPVQSKPQK.A                   | 1            | PDLI7_HUMAN          |
| Q9NR12                                                                | 2             | 3.8717           | R.HSQPATPTPLQSR.T                | 1            | PDLI7_HUMAN          |
| <b><i>PDZ domain-containing protein 1 - Homo sapiens (Human)</i></b>  |               |                  |                                  |              |                      |
| Q5T2W1                                                                | 2             | 4.8713           | K.KIPIVSSLADPLDTPPSK.E           | 4            | PDZD1_HUMAN          |
| Q5T2W1                                                                | 3             | 5.5399           | R.LAHFSPFLYQSQELPNGSVK.E         | 1            | PDZD1_HUMAN          |
| Q5T2W1                                                                | 3             | 4.8921           | R.KGGDQTSLLVVDKETDNMYR.L         | 2            | PDZD1_HUMAN          |
| Q5T2W1                                                                | 2             | 3.4356           | R.IEKDTEGHLVR.V                  | 2            | PDZD1_HUMAN          |
| Q5T2W1                                                                | 3             | 9.0236           | R.AGVLADDHLIEVNGENVEDASHEEVVEK.V | 1            | PDZD1_HUMAN          |
| Q5T2W1                                                                | 2             | 3.4423           | K.VVDRIQSSGK.N                   | 1            | PDZD1_HUMAN          |
| Q5T2W1                                                                | 3             | 4.4276           | K.LSKQEGQNYGFFLR.I               | 2            | PDZD1_HUMAN          |
| Q5T2W1                                                                | 2             | 5.2963           | K.KGVYMTDITPQGVAMR.A             | 1            | PDZD1_HUMAN          |
| Q5T2W1                                                                | 2             | 2.9916           | K.KAYDYFQAK.K                    | 1            | PDZD1_HUMAN          |
| Q5T2W1                                                                | 2             | 5.4692           | K.GQIIKDIDSGSPAEEAGLK.N          | 3            | PDZD1_HUMAN          |
| Q5T2W1                                                                | 3             | 4.236            | K.GGDQTSLLVVDKETDNMYR.L          | 1            | PDZD1_HUMAN          |
| Q5T2W1                                                                | 2             | 4.3337           | K.DIDSGSPAEEAGLK.N               | 7            | PDZD1_HUMAN          |
| Q5T2W1                                                                | 2             | 2.9871           | K.AGLQDGDR.V                     | 2            | PDZD1_HUMAN          |
| Q5T2W1                                                                | 2             | 2.9445           | K.AYDYFQAK.K                     | 1            | PDZD1_HUMAN          |
| <b><i>PDZ domain-containing protein 11 - Homo sapiens (Human)</i></b> |               |                  |                                  |              |                      |
| Q5EBL8                                                                | 2             | 3.8731           | K.KPPGAQLGFNIR.G                 | 3            | PDZ11_HUMAN          |
| Q5EBL8                                                                | 3             | 5.4635           | R.AGLQEGDQVLAVNDVDFQDIEHSK.A     | 1            | PDZ11_HUMAN          |
| Q5EBL8                                                                | 3             | 3.9778           | R.VHHPDYNNELTQFLPR.T             | 1            | PDZ11_HUMAN          |
| <b><i>PDZ domain-containing protein 2 - Homo sapiens (Human)</i></b>  |               |                  |                                  |              |                      |
| O15018                                                                | 3             | 3.9206           | K.TSVDTGQVSRPENPSQPASPR.V        | 1            | PDZD2_HUMAN          |

| <i>Accession No*</i>                                                                        | <i>Charge</i> | <i>XC(Max)**</i> | <i>Peptide*</i>               | <i>TC***</i> | <i>Reference No*</i> |
|---------------------------------------------------------------------------------------------|---------------|------------------|-------------------------------|--------------|----------------------|
| O15018                                                                                      | 2             | 3.4541           | R.TDTQSPTNTGSPSSPQQK.S        | 2            | PDZD2_HUMAN          |
| <b><i>PDZ domain-containing protein 8 - Homo sapiens (Human)</i></b>                        |               |                  |                               |              |                      |
| Q8NEN9                                                                                      | 3             | 3.9047           | R.AGIEDIETLESLSLDQHSK.K       | 1            | PDZD8_HUMAN          |
| <b><i>PDZ domain-containing protein GIPC1 - Homo sapiens (Human)</i></b>                    |               |                  |                               |              |                      |
| O14908                                                                                      | 2             | 2.7173           | R.DTELAATMVELGKDKR.N          | 1            | GIPC1_HUMAN          |
| O14908                                                                                      | 2             | 4.0998           | R.NPDELAELDER.L               | 1            | GIPC1_HUMAN          |
| O14908                                                                                      | 2             | 4.7185           | R.GPATVEDLPSAFEEK.A           | 2            | GIPC1_HUMAN          |
| <b><i>PDZ domain-containing protein GIPC2 - Homo sapiens (Human)</i></b>                    |               |                  |                               |              |                      |
| Q8TF65                                                                                      | 2             | 3.5763           | K.GPATVEEM#PSETK.A            | 1            | GIPC2_HUMAN          |
| <b><i>PDZK1-interacting protein 1 - Homo sapiens (Human)</i></b>                            |               |                  |                               |              |                      |
| Q13113                                                                                      | 3             | 4.3041           | R.SSEHENAYENVPEEEGKVR.S       | 4            | PDZ1I_HUMAN          |
| Q13113                                                                                      | 2             | 2.8377           | R.YSSM#AASFR.S                | 1            | PDZ1I_HUMAN          |
| Q13113                                                                                      | 2             | 3.2106           | R.YSSMAASFR.S                 | 3            | PDZ1I_HUMAN          |
| <b><i>Pentatricopeptide repeat protein 1 - Homo sapiens (Human)</i></b>                     |               |                  |                               |              |                      |
| O75127                                                                                      | 1             | 2.4557           | K.NFELNLK.T                   | 1            | PTCD1_HUMAN          |
| <b><i>Peptidase inhibitor 16 precursor - Homo sapiens (Human)</i></b>                       |               |                  |                               |              |                      |
| Q6UXB8                                                                                      | 2             | 4.1213           | R.WDEELAAFAK.A                | 3            | PI16_HUMAN           |
| <b><i>Peptidyl-prolyl cis-trans isomerase - Homo sapiens (Human)</i></b>                    |               |                  |                               |              |                      |
| Q6IBH5                                                                                      | 2             | 3.2216           | K.DTNGSQFFITTVK.T             | 2            | Q6IBH5_HUMAN         |
| Q6IBH5                                                                                      | 3             | 4.1141           | R.VIKDFMIQGGDFTR.G            | 2            | Q6IBH5_HUMAN         |
| Q6IBH5                                                                                      | 2             | 2.7131           | R.IGDEDVGR.V                  | 1            | Q6IBH5_HUMAN         |
| Q6IBH5                                                                                      | 2             | 3.2554           | K.VLEGMEVVR.K                 | 4            | Q6IBH5_HUMAN         |
| Q6IBH5                                                                                      | 2             | 2.7184           | K.VLEGM#EVVR.K                | 1            | Q6IBH5_HUMAN         |
| Q6IBH5                                                                                      | 2             | 3.1415           | K.HYGPGWVSMANAGK.D            | 1            | Q6IBH5_HUMAN         |
| Q6IBH5                                                                                      | 2             | 3.9135           | K.TVDNFVALATGEK.G             | 2            | Q6IBH5_HUMAN         |
| <b><i>Peptidyl-prolyl cis-trans isomerase A - Homo sapiens (Human)</i></b>                  |               |                  |                               |              |                      |
| P62937                                                                                      | 2             | 4.1428           | R.VSFELFADKVPK.T              | 7            | PPIA_HUMAN           |
| <b><i>Peptidyl-prolyl cis-trans isomerase G - Homo sapiens (Human)</i></b>                  |               |                  |                               |              |                      |
| Q13427                                                                                      | 2             | 2.9474           | K.NKEDEKIR.S                  | 2            | PPIG_HUMAN           |
| <b><i>Peptidyl-prolyl cis-trans isomerase NIMA-interacting 1 - Homo sapiens (Human)</i></b> |               |                  |                               |              |                      |
| Q13526                                                                                      | 3             | 4.2458           | R.GQMQKPFEDASFALR.T           | 5            | PIN1_HUMAN           |
| Q13526                                                                                      | 2             | 5.5875           | R.TKEEALELINGYIQK.I           | 4            | PIN1_HUMAN           |
| Q13526                                                                                      | 3             | 4.8015           | K.IKSGEEDFESLASQFSDCSSAK.A    | 1            | PIN1_HUMAN           |
| Q13526                                                                                      | 3             | 5.1352           | R.VYYFNHITNASQWERPSGNSSSGGK.N | 2            | PIN1_HUMAN           |
| Q13526                                                                                      | 3             | 4.107            | R.GQM#QKPFEDASFALR.T          | 2            | PIN1_HUMAN           |

| <i>Accession No*</i>                                                            | <i>Charge</i> | <i>XC(Max)**</i> | <i>Peptide*</i>           | <i>TC***</i> | <i>Reference No*</i> |
|---------------------------------------------------------------------------------|---------------|------------------|---------------------------|--------------|----------------------|
| <b><i>Peptidyl-prolyl cis-trans isomerase-like 2 - Homo sapiens (Human)</i></b> |               |                  |                           |              |                      |
| Q13356                                                                          | 2             | 3.8545           | K.SSQPQAGSQGPQTFR.Q       | 2            | PPIL2_HUMAN          |
| Q13356                                                                          | 2             | 3.314            | R.AAEEEEPSTSATVPM#SK.K    | 2            | PPIL2_HUMAN          |
| Q13356                                                                          | 2             | 3.4605           | R.AAEEEEPSTSATVPM#SK.K    | 2            | PPIL2_HUMAN          |
| <b><i>Pericentriolar material 1 protein - Homo sapiens (Human)</i></b>          |               |                  |                           |              |                      |
| Q15154                                                                          | 3             | 4.7073           | K.LLGELHTLRDQHLNNSSSPQR.S | 1            | PCM1_HUMAN           |
| Q15154                                                                          | 2             | 2.7027           | R.INFSDLDQR.S             | 1            | PCM1_HUMAN           |
| Q15154                                                                          | 2             | 3.6466           | R.KASAQASLASK.D           | 3            | PCM1_HUMAN           |
| Q15154                                                                          | 3             | 4.2261           | R.TPWLYEQEVEKPFIK.T       | 1            | PCM1_HUMAN           |
| <b><i>Periphilin-1 - Homo sapiens (Human)</i></b>                               |               |                  |                           |              |                      |
| Q8NEY8                                                                          | 2             | 3.639            | K.MLIEKDPSLEK.S           | 2            | PPHLN_HUMAN          |
| Q8NEY8                                                                          | 2             | 3.8089           | R.DTSPSSGSAVSSSK.V        | 5            | PPHLN_HUMAN          |
| Q8NEY8                                                                          | 2             | 4.23             | R.LTEKELAEAASK.W          | 2            | PPHLN_HUMAN          |
| <b><i>Periplakin - Homo sapiens (Human)</i></b>                                 |               |                  |                           |              |                      |
| O60437                                                                          | 2             | 3.4003           | R.ASQEEQIAR.K             | 2            | PEPL_HUMAN           |
| O60437                                                                          | 3             | 3.9084           | K.LHSEGDQLLAAEHPR.N       | 1            | PEPL_HUMAN           |
| O60437                                                                          | 3             | 4.207            | R.YVNDMSIQELAVLVSGQK.-    | 1            | PEPL_HUMAN           |
| O60437                                                                          | 3             | 4.4602           | R.VVQQEVVRYEEEPGLR.A      | 1            | PEPL_HUMAN           |
| O60437                                                                          | 2             | 2.8709           | R.QLLEGELETLR.R           | 2            | PEPL_HUMAN           |
| O60437                                                                          | 2             | 2.8594           | R.LQSEINMAATETR.D         | 2            | PEPL_HUMAN           |
| O60437                                                                          | 2             | 5.0562           | R.LQNLEFALNLLR.Q          | 4            | PEPL_HUMAN           |
| O60437                                                                          | 2             | 3.1175           | R.KVDSLNLQK.Y             | 3            | PEPL_HUMAN           |
| O60437                                                                          | 2             | 3.1326           | R.DGGQEYVVK.E             | 4            | PEPL_HUMAN           |
| O60437                                                                          | 2             | 3.0848           | K.VPDPVLEESFQQLQR.T       | 1            | PEPL_HUMAN           |
| O60437                                                                          | 2             | 3.1923           | K.TENPGDASDLQGR.Q         | 1            | PEPL_HUMAN           |
| O60437                                                                          | 3             | 3.7679           | K.DKDLEIDELQKR.L          | 1            | PEPL_HUMAN           |
| O60437                                                                          | 2             | 3.0748           | K.NLLDEIASR.E             | 2            | PEPL_HUMAN           |
| O60437                                                                          | 2             | 4.7945           | K.SLLGEVEQNLQAAK.Q        | 2            | PEPL_HUMAN           |
| O60437                                                                          | 3             | 4.4623           | K.KVPDPVLEESFQQLQR.T      | 2            | PEPL_HUMAN           |
| O60437                                                                          | 2             | 2.8166           | K.FTEVYAINR.Q             | 1            | PEPL_HUMAN           |
| O60437                                                                          | 2             | 4.158            | K.VVLQQDPQQR.E            | 4            | PEPL_HUMAN           |
| <b><i>Peroxiredoxin-1 - Homo sapiens (Human)</i></b>                            |               |                  |                           |              |                      |
| Q06830                                                                          | 3             | 4.6745           | K.KQGGGLGPMNIPLVSDPKR.T   | 1            | PRDX1_HUMAN          |
| Q06830                                                                          | 2             | 4.5328           | R.TIAQDYGVLKADREGISFR.G   | 1            | PRDX1_HUMAN          |
| Q06830                                                                          | 2             | 3.789            | R.LVQAFQFTDK.H            | 4            | PRDX1_HUMAN          |

| <i>Accession No*</i>                                                                           | <i>Charge</i> | <i>XC(Max)**</i> | <i>Peptide*</i>                 | <i>TC***</i> | <i>Reference No*</i> |
|------------------------------------------------------------------------------------------------|---------------|------------------|---------------------------------|--------------|----------------------|
| Q06830                                                                                         | 2             | 3.0147           | R.TIAQDYGVLK.A                  | 1            | PRDX1_HUMAN          |
| <b><i>Peroxiredoxin-2 - Homo sapiens (Human)</i></b>                                           |               |                  |                                 |              |                      |
| P32119                                                                                         | 3             | 4.7354           | R.RLSEDYGVLKTDEGIAYR.G          | 2            | PRDX2_HUMAN          |
| P32119                                                                                         | 2             | 3.3545           | K.TDEGIAYR.G                    | 3            | PRDX2_HUMAN          |
| P32119                                                                                         | 1             | 2.5993           | R.GLFIIDGK.G                    | 2            | PRDX2_HUMAN          |
| P32119                                                                                         | 3             | 3.9056           | R.KEGGLGPLNIPLLDVTR.R           | 1            | PRDX2_HUMAN          |
| P32119                                                                                         | 2             | 4.8592           | R.LSEDYGVLKTDEGIAYR.G           | 5            | PRDX2_HUMAN          |
| P32119                                                                                         | 2             | 3.6476           | R.RLSEDYGVLK.T                  | 2            | PRDX2_HUMAN          |
| <b><i>Peroxiredoxin-4 - Homo sapiens (Human)</i></b>                                           |               |                  |                                 |              |                      |
| Q13162                                                                                         | 2             | 3.1954           | R.QITLNDLPVGR.S                 | 4            | PRDX4_HUMAN          |
| Q13162                                                                                         | 3             | 4.2183           | R.QGGLGPIRIPLLSDLTHQISK.D       | 1            | PRDX4_HUMAN          |
| <b><i>Peroxiredoxin-5, mitochondrial precursor - Homo sapiens (Human)</i></b>                  |               |                  |                                 |              |                      |
| P30044                                                                                         | 2             | 3.8597           | K.GVLFGVPGAFTPGCSK.T            | 3            | PRDX5_HUMAN          |
| P30044                                                                                         | 2             | 4.2744           | K.THLPGFVEQAEALK.A              | 4            | PRDX5_HUMAN          |
| P30044                                                                                         | 3             | 4.4934           | K.THLPGFVEQAEALKAK.G            | 2            | PRDX5_HUMAN          |
| P30044                                                                                         | 2             | 3.7852           | K.VGDAIPAVEVFEGEPGNK.V          | 1            | PRDX5_HUMAN          |
| P30044                                                                                         | 3             | 3.9815           | R.LLADPTGAFGKETDLLDDSLVSIFGNR.R | 1            | PRDX5_HUMAN          |
| <b><i>Peroxisomal membrane protein PEX14 - Homo sapiens (Human)</i></b>                        |               |                  |                                 |              |                      |
| O75381                                                                                         | 2             | 3.773            | R.RGGDGQINEQVEK.L               | 1            | PEX14_HUMAN          |
| O75381                                                                                         | 2             | 3.4713           | R.GGGDGQINEQVEK.L               | 3            | PEX14_HUMAN          |
| <b><i>Peroxisomal targeting signal 1 receptor - Homo sapiens (Human)</i></b>                   |               |                  |                                 |              |                      |
| P50542                                                                                         | 2             | 3.5617           | K.LAGHFTQDK.A                   | 2            | PEX5_HUMAN           |
| P50542                                                                                         | 3             | 4.0866           | K.MDDLLEMQQIEQSNFR.Q            | 1            | PEX5_HUMAN           |
| <b><i>PERQ amino acid-rich with GYF domain-containing protein 1 - Homo sapiens (Human)</i></b> |               |                  |                                 |              |                      |
| O75420                                                                                         | 2             | 3.1709           | R.SIEEGDGAFGFR.S                | 2            | PERQ1_HUMAN          |
| <b><i>PERQ amino acid-rich with GYF domain-containing protein 2 - Homo sapiens (Human)</i></b> |               |                  |                                 |              |                      |
| Q6Y7W6                                                                                         | 2             | 4.8269           | K.ALQQQQQQQQK.L                 | 4            | PERQ2_HUMAN          |
| Q6Y7W6                                                                                         | 2             | 3.6202           | K.KVEEEEKLLK.L                  | 2            | PERQ2_HUMAN          |
| Q6Y7W6                                                                                         | 2             | 3.4454           | K.NSNM#GFWDDAVK.E               | 1            | PERQ2_HUMAN          |
| Q6Y7W6                                                                                         | 2             | 3.3233           | K.NSNMGFWDDAVK.E                | 2            | PERQ2_HUMAN          |
| Q6Y7W6                                                                                         | 2             | 4.2194           | K.SLLEIQQEEAR.Q                 | 4            | PERQ2_HUMAN          |
| <b><i>Pescadillo homolog 1 - Homo sapiens (Human)</i></b>                                      |               |                  |                                 |              |                      |
| O00541                                                                                         | 2             | 2.7407           | R.LAQEESEAK.R                   | 1            | PESC_HUMAN           |
| O00541                                                                                         | 2             | 3.6471           | R.LAQEESEAKR.L                  | 1            | PESC_HUMAN           |
| <b><i>PEST proteolytic signal-containing nuclear protein - Homo sapiens (Human)</i></b>        |               |                  |                                 |              |                      |

| <i>Accession No*</i>                                                                              | <i>Charge</i> | <i>XC(Max)**</i> | <i>Peptide*</i>                    | <i>TC***</i> | <i>Reference No*</i> |
|---------------------------------------------------------------------------------------------------|---------------|------------------|------------------------------------|--------------|----------------------|
| Q8WW12                                                                                            | 2             | 4.8273           | R.AGAAGGPEEEAEKPVK.T               | 5            | PCNP_HUMAN           |
| Q8WW12                                                                                            | 2             | 3.5803           | R.DTPTSAGPNSFNK.G                  | 4            | PCNP_HUMAN           |
| Q8WW12                                                                                            | 3             | 3.7893           | K.TLSVAAAFNEDEDESEPEEMPPEAK.M      | 1            | PCNP_HUMAN           |
| Q8WW12                                                                                            | 2             | 3.193            | K.SHLGNVHDQDN.-                    | 2            | PCNP_HUMAN           |
| Q8WW12                                                                                            | 3             | 5.018            | K.RSAEEEEADLPTKPTK.I               | 3            | PCNP_HUMAN           |
| Q8WW12                                                                                            | 2             | 4.879            | K.NIGRDTPTSAGPNSFNK.G              | 2            | PCNP_HUMAN           |
| Q8WW12                                                                                            | 2             | 3.1085           | K.KASAIK.L                         | 3            | PCNP_HUMAN           |
| Q8WW12                                                                                            | 2             | 3.3891           | K.FGFAIGSQTTK.A                    | 2            | PCNP_HUMAN           |
| Q8WW12                                                                                            | 2             | 4.229            | K.FGFAIGSQTTK.K                    | 5            | PCNP_HUMAN           |
| Q8WW12                                                                                            | 2             | 5.1345           | R.SAEEEEADLPTKPTK.I                | 6            | PCNP_HUMAN           |
| <b><i>PH domain leucine-rich repeat-containing protein phosphatase - Homo sapiens (Human)</i></b> |               |                  |                                    |              |                      |
| O60346                                                                                            | 3             | 3.7739           | R.ASAPAAAAAAAAAAAAAAAAALAAAAGGGR.S | 1            | PHLPP_HUMAN          |
| <b><i>PHD finger protein 3 - Homo sapiens (Human)</i></b>                                         |               |                  |                                    |              |                      |
| Q92576                                                                                            | 4             | 5.5189           | K.KTLQDQTLVQIFKPLTHSLSDK.S         | 1            | PHF3_HUMAN           |
| Q92576                                                                                            | 2             | 3.2881           | R.KVEQDSKETVK.L                    | 2            | PHF3_HUMAN           |
| <b><i>PHD finger-like domain-containing protein 5A - Homo sapiens (Human)</i></b>                 |               |                  |                                    |              |                      |
| Q7RTV0                                                                                            | 1             | 2.3886           | K.IVNLGSSK.T                       | 1            | PHF5A_HUMAN          |
| <b><i>Phenylalanyl-tRNA synthetase alpha chain - Homo sapiens (Human)</i></b>                     |               |                  |                                    |              |                      |
| Q9Y285                                                                                            | 2             | 5.2631           | K.SLQALGEVIEAELR.S                 | 4            | SYFA_HUMAN           |
| <b><i>Phosphatase and actin regulator 2 - Homo sapiens (Human)</i></b>                            |               |                  |                                    |              |                      |
| O75167                                                                                            | 2             | 3.2277           | R.TTLYSGTGLSVNR.E                  | 1            | PHAR2_HUMAN          |
| O75167                                                                                            | 3             | 4.2387           | R.LSQRPTTEELEQR.N                  | 2            | PHAR2_HUMAN          |
| <b><i>Phosphatase and actin regulator 4 - Homo sapiens (Human)</i></b>                            |               |                  |                                    |              |                      |
| Q8IZ21                                                                                            | 3             | 4.0001           | R.IQQALTSPLMPTILEGSHR.A            | 1            | PHAR4_HUMAN          |
| Q8IZ21                                                                                            | 3             | 6.1862           | R.AHSLLFENSDFSSEDSSTLGR.T          | 2            | PHAR4_HUMAN          |
| <b><i>Phosphatidylethanolamine-binding protein 1 - Homo sapiens (Human)</i></b>                   |               |                  |                                    |              |                      |
| P30086                                                                                            | 3             | 4.6218           | K.NRPTSISWDGLDSGKLYTLVLTDPDAPSR.K  | 1            | PEBP1_HUMAN          |
| P30086                                                                                            | 2             | 4.3648           | R.YVWLVEYQDRPLK.C                  | 4            | PEBP1_HUMAN          |
| P30086                                                                                            | 3             | 4.8705           | R.APVAGTCYQAEWDDYVPKLYEQLSGK.-     | 1            | PEBP1_HUMAN          |
| P30086                                                                                            | 4             | 7.1379           | K.WSGPLSLQEVEQPQHPLHVYAGAAVDEL     | 7            | PEBP1_HUMAN          |
| P30086                                                                                            | 3             | 4.9374           | K.NRPTSISWDGLDSGK.L                | 6            | PEBP1_HUMAN          |
| P30086                                                                                            | 2             | 3.9985           | K.LYTLVLTDPDAPSRK.D                | 1            | PEBP1_HUMAN          |
| P30086                                                                                            | 2             | 4.024            | K.LYTLVLTDPDAPSR.K                 | 2            | PEBP1_HUMAN          |
| P30086                                                                                            | 1             | 2.8961           | K.LYEQLSGK.-                       | 4            | PEBP1_HUMAN          |
| P30086                                                                                            | 3             | 3.7334           | K.GNDISSGTVLSDYVVGSGPPKGTGLHR.Y    | 1            | PEBP1_HUMAN          |



| <i>Accession No*</i>                                                                                         | <i>Charge</i> | <i>XC(Max)**</i> | <i>Peptide*</i>                     | <i>TC***</i> | <i>Reference No*</i> |
|--------------------------------------------------------------------------------------------------------------|---------------|------------------|-------------------------------------|--------------|----------------------|
| P30086                                                                                                       | 2             | 4.7679           | K.GNDISSGTVLSDYVGSPPK.G             | 2            | PEBP1_HUMAN          |
| P30086                                                                                                       | 2             | 4.4026           | R.APVAGTCYQAEWDDYVPK.L              | 1            | PEBP1_HUMAN          |
| <b><i>Phosphatidylinositol-4-phosphate 3-kinase C2 domain-containing beta polypeptide - Homo sapiens</i></b> |               |                  |                                     |              |                      |
| O00750                                                                                                       | 3             | 4.6756           | K.ISQPSDINTFSLVEQLPGK.L             | 1            | P3C2B_HUMAN          |
| <b><i>Phosphatidylinositol-4-phosphate 5-kinase type-2 alpha - Homo sapiens (Human)</i></b>                  |               |                  |                                     |              |                      |
| P48426                                                                                                       | 2             | 2.8648           | R.FLDFIGHILT.-                      | 2            | PI52A_HUMAN          |
| <b><i>Phosphofurin acidic cluster sorting protein 1 - Homo sapiens (Human)</i></b>                           |               |                  |                                     |              |                      |
| Q6VY07                                                                                                       | 3             | 4.3518           | K.TDLQGSASPSKVEGVHTPR.Q             | 1            | PACS1_HUMAN          |
| Q6VY07                                                                                                       | 3             | 4.53             | R.GSGVAQSPQQPPQPPQPPQPPQPPQPPQPPK.L | 1            | PACS1_HUMAN          |
| Q6VY07                                                                                                       | 2             | 4.3339           | K.VSDEVGFGLEHVS.R.E                 | 2            | PACS1_HUMAN          |
| Q6VY07                                                                                                       | 2             | 3.3464           | K.TDLQGSASPSK.V                     | 2            | PACS1_HUMAN          |
| Q6VY07                                                                                                       | 2             | 4.2921           | K.GSLGKDTTSPMELAALEK.I              | 2            | PACS1_HUMAN          |
| Q6VY07                                                                                                       | 2             | 3.5531           | K.GSLGKDTTSPM#ELAALEK.I             | 1            | PACS1_HUMAN          |
| Q6VY07                                                                                                       | 2             | 3.2824           | K.DTTSPM#ELAALEK.I                  | 3            | PACS1_HUMAN          |
| Q6VY07                                                                                                       | 3             | 4.7964           | R.FKVSDEVGFGLEHVS.R.E               | 2            | PACS1_HUMAN          |
| <b><i>Phosphofurin acidic cluster sorting protein 2 - Homo sapiens (Human)</i></b>                           |               |                  |                                     |              |                      |
| Q86VP3                                                                                                       | 3             | 5.0168           | R.EHPGQPEDSPEAEASTLDVFTER.L         | 1            | PACS2_HUMAN          |
| Q86VP3                                                                                                       | 3             | 3.7912           | R.SHKEPPSPADVPEK.T                  | 1            | PACS2_HUMAN          |
| <b><i>Phosphoglycerate kinase 1 - Homo sapiens (Human)</i></b>                                               |               |                  |                                     |              |                      |
| P00558                                                                                                       | 2             | 3.0315           | K.VLNNMEIGTSLFDEEGAK.I              | 1            | PGK1_HUMAN           |
| P00558                                                                                                       | 1             | 2.1443           | K.YAEAVTR.A                         | 1            | PGK1_HUMAN           |
| P00558                                                                                                       | 2             | 3.4696           | K.NNQITNNQR.I                       | 3            | PGK1_HUMAN           |
| P00558                                                                                                       | 3             | 4.2833           | R.AHSSMVGVNLPQK.A                   | 1            | PGK1_HUMAN           |
| <b><i>Phospholipase C X domain-containing protein 2 - Homo sapiens (Human)</i></b>                           |               |                  |                                     |              |                      |
| Q0VAA5                                                                                                       | 2             | 2.7608           | R.IQEAFGNKLCPCSVESLTLR.T            | 1            | Q0VAA5_HUMA          |
| <b><i>Phospholipase C, beta 4 - Homo sapiens (Human)</i></b>                                                 |               |                  |                                     |              |                      |
| Q5JYT3                                                                                                       | 2             | 3.0854           | R.DGPQTSNSSMK.L                     | 2            | Q5JYT3_HUMAN         |
| <b><i>Phosphoprotein associated with glycosphingolipid-enriched microdomains 1 - Homo sapiens (Hum</i></b>   |               |                  |                                     |              |                      |
| Q9NWQ8                                                                                                       | 2             | 4.1684           | K.SGQSLTVPESTYTSIQGDPQR.S           | 2            | PAG1_HUMAN           |
| Q9NWQ8                                                                                                       | 3             | 5.7476           | K.SREEDPTLTEEEISAMYSSVNKPGQLVNK.S   | 1            | PAG1_HUMAN           |
| <b><i>Pigment epithelium-derived factor precursor - Homo sapiens (Human)</i></b>                             |               |                  |                                     |              |                      |
| P36955                                                                                                       | 2             | 4.4175           | K.LAAAVSNFGYDLYR.V                  | 2            | PEDF_HUMAN           |
| <b><i>Pinin - Homo sapiens (Human)</i></b>                                                                   |               |                  |                                     |              |                      |
| Q9H307                                                                                                       | 2             | 3.1877           | R.DLIQDQNMDEK.G                     | 2            | PININ_HUMAN          |
| Q9H307                                                                                                       | 2             | 3.9011           | R.DLIQDQNMDEKQK.Q                   | 2            | PININ_HUMAN          |

| <i>Accession No*</i>                                                                       | <i>Charge</i> | <i>XC(Max)**</i> | <i>Peptide*</i>                  | <i>TC***</i> | <i>Reference No*</i> |
|--------------------------------------------------------------------------------------------|---------------|------------------|----------------------------------|--------------|----------------------|
| Q9H307                                                                                     | 1             | 2.9817           | R.TLQEQLEK.A                     | 3            | PININ_HUMAN          |
| Q9H307                                                                                     | 2             | 2.9585           | R.DLIQDQNM#DEK.G                 | 1            | PININ_HUMAN          |
| <b><i>Pitriylsin metallopeptidase 1 - Homo sapiens (Human)</i></b>                         |               |                  |                                  |              |                      |
| Q5JRW8                                                                                     | 2             | 2.8346           | K.RPVC*GSGDLGLISPR.A             | 2            | Q5JRW8_HUMA          |
| <b><i>Plakophilin-4 - Homo sapiens (Human)</i></b>                                         |               |                  |                                  |              |                      |
| Q99569                                                                                     | 3             | 3.8001           | R.QEAASGPGMEPETTATTILASVKEQELQFQ | 1            | PKP4_HUMAN           |
| <b><i>Plasma membrane calcium-transporting ATPase 4 - Homo sapiens (Human)</i></b>         |               |                  |                                  |              |                      |
| P23634                                                                                     | 3             | 4.5443           | R.TPLLDEEEEEENPDKASK.F           | 2            | AT2B4_HUMAN          |
| <b><i>Plasma serine protease inhibitor precursor - Homo sapiens (Human)</i></b>            |               |                  |                                  |              |                      |
| P05154                                                                                     | 2             | 4.1833           | K.AVVEVDESGTR.A                  | 5            | IPSP_HUMAN           |
| P05154                                                                                     | 2             | 4.1374           | R.AAAATGTIFTFR.S                 | 3            | IPSP_HUMAN           |
| <b><i>Plasmalemma vesicle-associated protein - Homo sapiens (Human)</i></b>                |               |                  |                                  |              |                      |
| Q9BX97                                                                                     | 3             | 4.3288           | R.PMGVPVNPQPIDPASLEEFKR.K        | 2            | PLVAP_HUMAN          |
| <b><i>Plasminogen activator inhibitor 1 RNA-binding protein - Homo sapiens (Human)</i></b> |               |                  |                                  |              |                      |
| Q8NC51                                                                                     | 2             | 3.2375           | R.TDKSSASAPDVDDPEAFPALA.-        | 1            | PAIRB_HUMAN          |
| Q8NC51                                                                                     | 2             | 5.5292           | R.GGSGSHNWGTVKDELTESPK.Y         | 5            | PAIRB_HUMAN          |
| Q8NC51                                                                                     | 3             | 4.4495           | R.KNPLPPSVGVVDKK.E               | 2            | PAIRB_HUMAN          |
| Q8NC51                                                                                     | 2             | 3.5469           | R.KPNEGADGQWK.K                  | 7            | PAIRB_HUMAN          |
| Q8NC51                                                                                     | 2             | 3.5523           | R.PDQQLQGEQK.I                   | 2            | PAIRB_HUMAN          |
| Q8NC51                                                                                     | 2             | 2.9152           | R.RFEKPLEEK.G                    | 1            | PAIRB_HUMAN          |
| Q8NC51                                                                                     | 2             | 2.8973           | R.SFSHYSGLK.H                    | 2            | PAIRB_HUMAN          |
| Q8NC51                                                                                     | 2             | 5.2238           | R.KPANDITSQLEINFGDLGR.P          | 4            | PAIRB_HUMAN          |
| Q8NC51                                                                                     | 2             | 3.1958           | R.FDQLFDDESDPFVVK.A              | 4            | PAIRB_HUMAN          |
| Q8NC51                                                                                     | 2             | 4.1674           | R.RPDQQLQGEQK.I                  | 5            | PAIRB_HUMAN          |
| Q8NC51                                                                                     | 3             | 4.6038           | K.SKSEEHAEDSVM#DHHFR.K           | 2            | PAIRB_HUMAN          |
| Q8NC51                                                                                     | 3             | 5.1206           | K.SEEHAEDSVMDDHHFR.K             | 4            | PAIRB_HUMAN          |
| Q8NC51                                                                                     | 2             | 5.0516           | K.SKSEEHAEDSVMDDHHFR.K           | 4            | PAIRB_HUMAN          |
| Q8NC51                                                                                     | 2             | 5.2163           | K.SAAQAAAQTNNAAGK.Q              | 9            | PAIRB_HUMAN          |
| Q8NC51                                                                                     | 2             | 4.8495           | K.KKEAGGGVGGPGAK.S               | 11           | PAIRB_HUMAN          |
| Q8NC51                                                                                     | 1             | 2.402            | K.KGFVLHK.S                      | 2            | PAIRB_HUMAN          |
| Q8NC51                                                                                     | 3             | 4.0152           | K.KEETQPPVALKK.E                 | 3            | PAIRB_HUMAN          |
| Q8NC51                                                                                     | 1             | 2.3464           | K.EMTLDEWK.A                     | 1            | PAIRB_HUMAN          |
| Q8NC51                                                                                     | 2             | 2.78             | K.EETQPPVALKK.E                  | 1            | PAIRB_HUMAN          |
| Q8NC51                                                                                     | 2             | 3.2895           | K.EAGGGVGGPGAK.S                 | 9            | PAIRB_HUMAN          |
| Q8NC51                                                                                     | 2             | 4.2565           | R.KPNEGADGQWKK.G                 | 5            | PAIRB_HUMAN          |

| <i>Accession No*</i>                                                                            | <i>Charge</i> | <i>XC(Max)**</i> | <i>Peptide*</i>         | <i>TC***</i> | <i>Reference No*</i> |
|-------------------------------------------------------------------------------------------------|---------------|------------------|-------------------------|--------------|----------------------|
| <b><i>Plasminogen precursor - Homo sapiens (Human)</i></b>                                      |               |                  |                         |              |                      |
| P00747                                                                                          | 2             | 3.5964           | K.TPENYPNAGLTM#NYCR.N   | 1            | PLMN_HUMAN           |
| P00747                                                                                          | 2             | 3.5525           | R.NPDGDVGGPWCYTTNPR.K   | 1            | PLMN_HUMAN           |
| P00747                                                                                          | 2             | 4.4977           | K.TPENYPNAGLTMNYCR.N    | 2            | PLMN_HUMAN           |
| P00747                                                                                          | 2             | 3.3955           | R.HSIFTPETNPR.A         | 2            | PLMN_HUMAN           |
| <b><i>Platelet basic protein precursor - Homo sapiens (Human)</i></b>                           |               |                  |                         |              |                      |
| P02775                                                                                          | 2             | 6.0096           | K.GKEESLSDLYAELR.C      | 2            | SCYB7_HUMAN          |
| P02775                                                                                          | 2             | 2.8032           | K.ICLDPDAPR.I           | 2            | SCYB7_HUMAN          |
| P02775                                                                                          | 1             | 3.5889           | K.KLAGDESAD.-           | 12           | SCYB7_HUMAN          |
| P02775                                                                                          | 1             | 2.2146           | K.LAGDESAD.-            | 1            | SCYB7_HUMAN          |
| P02775                                                                                          | 2             | 2.9205           | K.NIQSLEVIGK.G          | 6            | SCYB7_HUMAN          |
| <b><i>Platelet endothelial cell adhesion molecule precursor - Homo sapiens (Human)</i></b>      |               |                  |                         |              |                      |
| P16284                                                                                          | 2             | 4.5588           | K.DTETVYSEVR.K          | 7            | PECA1_HUMAN          |
| P16284                                                                                          | 1             | 2.1448           | R.TEGSLDGT.-            | 1            | PECA1_HUMAN          |
| P16284                                                                                          | 2             | 3.1029           | R.YSRTEGSLDGT.-         | 2            | PECA1_HUMAN          |
| P16284                                                                                          | 2             | 3.3817           | R.KAVPDAVESR.Y          | 4            | PECA1_HUMAN          |
| P16284                                                                                          | 2             | 3.693            | K.DTETVYSEVRK.A         | 3            | PECA1_HUMAN          |
| P16284                                                                                          | 1             | 2.365            | K.AVPDAVESR.Y           | 2            | PECA1_HUMAN          |
| P16284                                                                                          | 2             | 3.2459           | K.STESYFIPEVR.I         | 1            | PECA1_HUMAN          |
| P16284                                                                                          | 3             | 4.4683           | K.KDTETVYSEVRK.A        | 2            | PECA1_HUMAN          |
| <b><i>Platelet-activating factor acetylhydrolase IB subunit beta - Homo sapiens (Human)</i></b> |               |                  |                         |              |                      |
| P68402                                                                                          | 2             | 3.5562           | K.IIVLGLLPR.G           | 4            | PA1B2_HUMAN          |
| P68402                                                                                          | 2             | 3.4179           | R.ELFSPHALNFGIGDTR.H    | 1            | PA1B2_HUMAN          |
| <b><i>Pleckstrin homology domain-containing family A member 1 - Homo sapiens (Human)</i></b>    |               |                  |                         |              |                      |
| Q9HB21                                                                                          | 2             | 3.6511           | K.VTEQALLRPQSK.N        | 2            | PKHA1_HUMAN          |
| Q9HB21                                                                                          | 2             | 3.3335           | R.SNSLVSTFTMEK.R        | 2            | PKHA1_HUMAN          |
| <b><i>Pleckstrin homology domain-containing family A member 2 - Homo sapiens (Human)</i></b>    |               |                  |                         |              |                      |
| Q9HB19                                                                                          | 3             | 4.0423           | K.EKPFM#FNLDDENIRTSDV.- | 1            | PKHA2_HUMAN          |
| <b><i>Pleckstrin homology domain-containing family A member 5 - Homo sapiens (Human)</i></b>    |               |                  |                         |              |                      |
| Q9HAU0                                                                                          | 2             | 4.023            | R.TNSM#QQLEQWIK.I       | 3            | PKHA5_HUMAN          |
| Q9HAU0                                                                                          | 2             | 4.3609           | R.TNSMQQLEQWIK.I        | 4            | PKHA5_HUMAN          |
| Q9HAU0                                                                                          | 2             | 3.7299           | R.GTTEIGM#IGSKPFSTVK.Y  | 2            | PKHA5_HUMAN          |
| Q9HAU0                                                                                          | 2             | 4.4315           | R.GTTEIGMIGSKPFSTVK.Y   | 3            | PKHA5_HUMAN          |
| Q9HAU0                                                                                          | 2             | 2.8122           | R.GVISYQTLPR.N          | 1            | PKHA5_HUMAN          |
| Q9HAU0                                                                                          | 2             | 3.1308           | R.IQDVMGLSK.H           | 1            | PKHA5_HUMAN          |

| <i>Accession No*</i>                                                                         | <i>Charge</i> | <i>XC(Max)**</i> | <i>Peptide*</i>                  | <i>TC***</i> | <i>Reference No*</i> |
|----------------------------------------------------------------------------------------------|---------------|------------------|----------------------------------|--------------|----------------------|
| Q9HAU0                                                                                       | 2             | 2.803            | R.MTVEEQM#ER.I                   | 1            | PKHA5_HUMAN          |
| Q9HAU0                                                                                       | 2             | 4.9841           | R.NQMQEQLDHLGEVQTESAGIQR.A       | 1            | PKHA5_HUMAN          |
| Q9HAU0                                                                                       | 2             | 2.789            | R.SVPAGLTLQSVSPQSLQGK.T          | 1            | PKHA5_HUMAN          |
| Q9HAU0                                                                                       | 3             | 4.3304           | R.GGNRPNTGPLYTEADR.V             | 3            | PKHA5_HUMAN          |
| Q9HAU0                                                                                       | 3             | 4.7779           | R.RSVPAGLTLQSVSPQSLQGK.T         | 2            | PKHA5_HUMAN          |
| Q9HAU0                                                                                       | 2             | 2.894            | K.DGQDRPLTK.I                    | 1            | PKHA5_HUMAN          |
| Q9HAU0                                                                                       | 2             | 2.7699           | R.GNQTM#AVK.S                    | 1            | PKHA5_HUMAN          |
| Q9HAU0                                                                                       | 2             | 2.9571           | R.GNQTM#AVK.S                    | 2            | PKHA5_HUMAN          |
| Q9HAU0                                                                                       | 2             | 3.0235           | K.GLNVIGASDQSPQLQSPSNLR.D        | 1            | PKHA5_HUMAN          |
| Q9HAU0                                                                                       | 2             | 4.5746           | K.IVNVSLADLR.G                   | 2            | PKHA5_HUMAN          |
| Q9HAU0                                                                                       | 3             | 3.7218           | K.KGLNVIGASDQSPQLQSPSNLR.D       | 1            | PKHA5_HUMAN          |
| Q9HAU0                                                                                       | 3             | 4.8278           | K.KKGLNVIGASDQSPQLQSPSNLR.D      | 1            | PKHA5_HUMAN          |
| Q9HAU0                                                                                       | 2             | 3.5576           | K.TLSQDEGRGTYK.Y                 | 2            | PKHA5_HUMAN          |
| Q9HAU0                                                                                       | 3             | 5.9007           | K.TMVNISDQTMHSIPTSPSHGSIAYQGYSPQ | 2            | PKHA5_HUMAN          |
| Q9HAU0                                                                                       | 3             | 3.842            | K.TRPESICSVTPSTHDK.T             | 2            | PKHA5_HUMAN          |
| Q9HAU0                                                                                       | 2             | 3.2871           | K.YRPEEVDIDAK.L                  | 2            | PKHA5_HUMAN          |
| <b><i>Pleckstrin homology domain-containing family A member 7 - Homo sapiens (Human)</i></b> |               |                  |                                  |              |                      |
| Q6IQ23                                                                                       | 2             | 3.7361           | R.VFFINDQLR.C                    | 2            | PKHA7_HUMAN          |
| Q6IQ23                                                                                       | 2             | 3.6128           | R.SPYSPAEEDALFMDLPTGPR.G         | 2            | PKHA7_HUMAN          |
| <b><i>Pleckstrin homology domain-containing family F member 2 - Homo sapiens (Human)</i></b> |               |                  |                                  |              |                      |
| Q9H8W4                                                                                       | 2             | 2.7126           | R.LANSEANTR.R                    | 1            | PKHF2_HUMAN          |
| <b><i>Pleckstrin homology domain-containing family G member 1 - Homo sapiens (Human)</i></b> |               |                  |                                  |              |                      |
| Q9ULL1                                                                                       | 2             | 3.1407           | K.TSETAQDIQK.V                   | 1            | PKHG1_HUMAN          |
| <b><i>Pleckstrin homology-like domain family B member 1 - Homo sapiens (Human)</i></b>       |               |                  |                                  |              |                      |
| Q86UU1                                                                                       | 2             | 5.2747           | R.GLLTDSAPAATVLAEAR.R            | 2            | PHLB1_HUMAN          |
| Q86UU1                                                                                       | 3             | 5.1284           | R.ADGGPEAGELPSIGEATAALALAGR.R    | 3            | PHLB1_HUMAN          |
| Q86UU1                                                                                       | 2             | 3.9208           | R.DKEAELETETK.L                  | 2            | PHLB1_HUMAN          |
| Q86UU1                                                                                       | 4             | 5.0634           | R.DKEAELETETKLFEDLEFQQLER.E      | 1            | PHLB1_HUMAN          |
| <b><i>Pleckstrin homology-like domain family B member 2 - Homo sapiens (Human)</i></b>       |               |                  |                                  |              |                      |
| Q86SQ0                                                                                       | 2             | 3.0886           | R.LQEETSQR.Q                     | 1            | PHLB2_HUMAN          |
| Q86SQ0                                                                                       | 3             | 3.9492           | R.GYNHQQMSEGHR.Q                 | 1            | PHLB2_HUMAN          |
| Q86SQ0                                                                                       | 2             | 2.9245           | K.EGLYLSDTLPR.K                  | 1            | PHLB2_HUMAN          |
| Q86SQ0                                                                                       | 2             | 3.7442           | K.RLQEETSQR.Q                    | 4            | PHLB2_HUMAN          |
| Q86SQ0                                                                                       | 2             | 3.3988           | K.NNLIMMLQR.E                    | 1            | PHLB2_HUMAN          |
| <b><i>Pleiotropic regulator 1 - Homo sapiens (Human)</i></b>                                 |               |                  |                                  |              |                      |

| <i>Accession No*</i>                                                                 | <i>Charge</i> | <i>XC(Max)**</i> | <i>Peptide*</i>                   | <i>TC***</i> | <i>Reference No*</i> |
|--------------------------------------------------------------------------------------|---------------|------------------|-----------------------------------|--------------|----------------------|
| O43660                                                                               | 2             | 3.2206           | K.GPQNATDSYVHK.Q                  | 1            | PLRG1_HUMAN          |
| O43660                                                                               | 3             | 4.7893           | K.LRNEYGPVLHMPTSK.E               | 1            | PLRG1_HUMAN          |
| O43660                                                                               | 2             | 5.0553           | R.MPSESAAQSLAVALPLQTK.A           | 3            | PLRG1_HUMAN          |
| <b><i>PLEKHG2 protein - Homo sapiens (Human)</i></b>                                 |               |                  |                                   |              |                      |
| Q96D18                                                                               | 2             | 4.5905           | R.PGFPEPLILEDSDLGGDSGSGK.A        | 1            | Q96D18_HUMAN         |
| <b><i>Plexin domain-containing protein 2 precursor - Homo sapiens (Human)</i></b>    |               |                  |                                   |              |                      |
| Q6UX71                                                                               | 2             | 2.7294           | R.ASVGQDSPEPR.S                   | 1            | PXDC2_HUMAN          |
| <b><i>Plexin-A2 precursor - Homo sapiens (Human)</i></b>                             |               |                  |                                   |              |                      |
| O75051                                                                               | 2             | 2.8405           | R.RDKC*QQAWEPNR.F                 | 1            | PLXA2_HUMAN          |
| <b><i>PML-RARA-regulated adapter molecule 1 - Homo sapiens (Human)</i></b>           |               |                  |                                   |              |                      |
| Q96QH2                                                                               | 4             | 5.1196           | K.KSVPQPEFSEAAQTPLWKQSSEPK.R      | 1            | PRAM_HUMAN           |
| Q96QH2                                                                               | 3             | 4.1977           | K.KPPQPELGGGLPR.T                 | 1            | PRAM_HUMAN           |
| Q96QH2                                                                               | 2             | 3.1823           | K.FQASQPEPSDLPK.K                 | 2            | PRAM_HUMAN           |
| Q96QH2                                                                               | 3             | 3.9625           | K.KPAQPEFNVYPK.K                  | 2            | PRAM_HUMAN           |
| <b><i>Poliovirus receptor precursor - Homo sapiens (Human)</i></b>                   |               |                  |                                   |              |                      |
| P15151                                                                               | 2             | 4.4826           | R.ENSSSQDPQTEGTR.-                | 2            | PVR_HUMAN            |
| <b><i>Poliovirus receptor-related protein 1 precursor - Homo sapiens (Human)</i></b> |               |                  |                                   |              |                      |
| Q15223                                                                               | 2             | 2.7595           | K.ITQVTWQK.S                      | 1            | PVRL1_HUMAN          |
| Q15223                                                                               | 2             | 2.9871           | K.QNVAIYNPSMGVSVLAPYR.E           | 1            | PVRL1_HUMAN          |
| Q15223                                                                               | 3             | 4.3269           | R.TLGYQYDPEQLDLAENMVSQNDGSFISKK.E | 1            | PVRL1_HUMAN          |
| <b><i>Poly [ADP-ribose] polymerase 1 - Homo sapiens (Human)</i></b>                  |               |                  |                                   |              |                      |
| P09874                                                                               | 2             | 2.8839           | K.GQVKEEGINK.S                    | 1            | PARP1_HUMAN          |
| P09874                                                                               | 2             | 3.2138           | K.TLGDFAAEYAK.S                   | 2            | PARP1_HUMAN          |
| P09874                                                                               | 3             | 4.1562           | K.GQVKEEGINKSEK.R                 | 2            | PARP1_HUMAN          |
| <b><i>Poly [ADP-ribose] polymerase 14 - Homo sapiens (Human)</i></b>                 |               |                  |                                   |              |                      |
| Q460N5                                                                               | 2             | 2.8605           | K.ATLPDTAAPPGLPPAAAGPGKTSWEK.G    | 1            | PAR14_HUMAN          |
| Q460N5                                                                               | 2             | 3.3359           | R.FLVFFYPEDVR.Q                   | 2            | PAR14_HUMAN          |
| <b><i>Poly(A) polymerase alpha - Homo sapiens (Human)</i></b>                        |               |                  |                                   |              |                      |
| P51003                                                                               | 3             | 3.7942           | K.TSSTDLSIPALPANPIPIV.N           | 2            | PAPOA_HUMAN          |
| <b><i>Poly(rC)-binding protein 1 - Homo sapiens (Human)</i></b>                      |               |                  |                                   |              |                      |
| Q15365                                                                               | 2             | 3.4647           | K.IANPVEGSSGR.Q                   | 4            | PCBP1_HUMAN          |
| <b><i>Polyadenylate-binding protein 1 - Homo sapiens (Human)</i></b>                 |               |                  |                                   |              |                      |
| P11940                                                                               | 3             | 4.4359           | R.VANTSTQTM#GPRPAAAAAATPAVR.T     | 4            | PABP1_HUMAN          |
| P11940                                                                               | 3             | 4.9289           | R.VANTSTQTMGPRPAAAAAATPAVR.T      | 2            | PABP1_HUMAN          |
| <b><i>Polyadenylate-binding protein 2 - Homo sapiens (Human)</i></b>                 |               |                  |                                   |              |                      |

| <i>Accession No*</i>                                                            | <i>Charge</i> | <i>XC(Max)**</i> | <i>Peptide*</i>                    | <i>TC***</i> | <i>Reference No*</i> |
|---------------------------------------------------------------------------------|---------------|------------------|------------------------------------|--------------|----------------------|
| Q86U42                                                                          | 2             | 3.5612           | K.GFAYIEFSDKESVR.T                 | 2            | PABP2_HUMAN          |
| Q86U42                                                                          | 4             | 6.7798           | R.HLVPGAGGEAGEGAPGGAGDYGNGLSEEL    | 1            | PABP2_HUMAN          |
| Q86U42                                                                          | 2             | 3.9254           | R.TSLALDESLFR.G                    | 1            | PABP2_HUMAN          |
| Q86U42                                                                          | 2             | 3.9245           | R.VREMEEEAEK.L                     | 4            | PABP2_HUMAN          |
| <b><i>Polycystin-2 - Homo sapiens (Human)</i></b>                               |               |                  |                                    |              |                      |
| Q13563                                                                          | 2             | 3.5263           | R.SAASSAVSSVGAR.S                  | 2            | PKD2_HUMAN           |
| Q13563                                                                          | 2             | 4.9797           | R.DPPAGAAASPSPLSSCSR.Q             | 4            | PKD2_HUMAN           |
| <b><i>Polyglutamine-binding protein 1 - Homo sapiens (Human)</i></b>            |               |                  |                                    |              |                      |
| O60828                                                                          | 2             | 2.7093           | R.REELAPYPK.S                      | 1            | PQBP1_HUMAN          |
| O60828                                                                          | 3             | 4.4934           | R.KDEELDPM#DPSSYS DAPR.G           | 2            | PQBP1_HUMAN          |
| O60828                                                                          | 3             | 5.561            | R.KDEELDPMDPSSYS DAPR.G            | 5            | PQBP1_HUMAN          |
| <b><i>Polymerase I and transcript release factor - Homo sapiens (Human)</i></b> |               |                  |                                    |              |                      |
| Q6NZ12                                                                          | 3             | 4.5346           | K.TAVYKVPPTFHVK.K                  | 7            | PTRF_HUMAN           |
| Q6NZ12                                                                          | 2             | 3.5285           | R.KSFTPDHVVYAR.S                   | 2            | PTRF_HUMAN           |
| Q6NZ12                                                                          | 1             | 2.8196           | R.EGQVEVLK.A                       | 8            | PTRF_HUMAN           |
| Q6NZ12                                                                          | 2             | 5.4266           | K.ATEMVEVGADDDEGGAER.G             | 5            | PTRF_HUMAN           |
| Q6NZ12                                                                          | 1             | 2.135            | K.VSVNVK.T                         | 1            | PTRF_HUMAN           |
| Q6NZ12                                                                          | 2             | 3.0589           | R.LKTENLEK.T                       | 3            | PTRF_HUMAN           |
| Q6NZ12                                                                          | 2             | 2.9962           | K.VPPPTFHVK.K                      | 3            | PTRF_HUMAN           |
| Q6NZ12                                                                          | 2             | 4.6556           | K.VMIYQDEVKLPK.L                   | 5            | PTRF_HUMAN           |
| Q6NZ12                                                                          | 2             | 2.8766           | K.VMIYQDEVK.L                      | 3            | PTRF_HUMAN           |
| Q6NZ12                                                                          | 2             | 4.2932           | K.VM#IYQDEVKLPK.L                  | 6            | PTRF_HUMAN           |
| Q6NZ12                                                                          | 2             | 3.8069           | K.TAVYKVPPTFHVKK.I                 | 2            | PTRF_HUMAN           |
| Q6NZ12                                                                          | 2             | 2.9744           | K.SFTPDHVVYAR.S                    | 1            | PTRF_HUMAN           |
| Q6NZ12                                                                          | 2             | 4.2205           | K.LGKAHATTSNTVSK.L                 | 1            | PTRF_HUMAN           |
| Q6NZ12                                                                          | 2             | 3.9811           | K.LEVNEAELLR.R                     | 4            | PTRF_HUMAN           |
| Q6NZ12                                                                          | 2             | 3.2166           | K.KLEVNEAELLRR.R                   | 1            | PTRF_HUMAN           |
| Q6NZ12                                                                          | 2             | 4.5524           | K.KLEVNEAELLR.R                    | 7            | PTRF_HUMAN           |
| Q6NZ12                                                                          | 3             | 4.1257           | K.IREGQVEVLK.A                     | 4            | PTRF_HUMAN           |
| Q6NZ12                                                                          | 3             | 6.7875           | K.IIGAVDQIQLTQAQLEERQAEM#EGAVQSIQG | 1            | PTRF_HUMAN           |
| Q6NZ12                                                                          | 3             | 5.4037           | K.ATEMVEVGADDDEGGAERGEAGDLR.R      | 39           | PTRF_HUMAN           |
| Q6NZ12                                                                          | 3             | 4.2967           | K.ATEM#VEVGADDDEGGAERGEAGDLR.R     | 6            | PTRF_HUMAN           |
| Q6NZ12                                                                          | 2             | 4.7552           | K.ATEM#VEVGADDDEGGAER.G            | 9            | PTRF_HUMAN           |
| Q6NZ12                                                                          | 2             | 5.0631           | R.QAEMEGAVQSIQGELSK.L              | 2            | PTRF_HUMAN           |
| Q6NZ12                                                                          | 3             | 5.4839           | K.IIGAVDQIQLTQAQLEER.Q             | 2            | PTRF_HUMAN           |

| <i>Accession No*</i>                                                                 | <i>Charge</i> | <i>XC(Max)**</i> | <i>Peptide*</i>             | <i>TC***</i> | <i>Reference No*</i> |
|--------------------------------------------------------------------------------------|---------------|------------------|-----------------------------|--------------|----------------------|
| <b><i>Polymeric-immunoglobulin receptor precursor - Homo sapiens (Human)</i></b>     |               |                  |                             |              |                      |
| P01833                                                                               | 2             | 5.0782           | R.ASVDSGSSEEQGGSSR.A        | 1            | PIGR_HUMAN           |
| <b><i>Polypeptide N-acetylgalactosaminyltransferase 6 - Homo sapiens (Human)</i></b> |               |                  |                             |              |                      |
| Q8NCL4                                                                               | 3             | 4.0119           | R.VWQCGGQLEIIPC*SVVGHVFRK.S | 1            | GALT6_HUMAN          |
| <b><i>Porphobilinogen deaminase - Homo sapiens (Human)</i></b>                       |               |                  |                             |              |                      |
| P08397                                                                               | 3             | 5.1212           | R.GPQLAAQNGLISLANLLLSK.G    | 1            | HEM3_HUMAN           |
| <b><i>Potassium channel modulatory factor 1 - Homo sapiens (Human)</i></b>           |               |                  |                             |              |                      |
| Q9BWK2                                                                               | 2             | 2.8758           | R.DLDESSGVR.H               | 1            | Q9BWK2_HUMA          |
| <b><i>PRA1 family protein 3 - Homo sapiens (Human)</i></b>                           |               |                  |                             |              |                      |
| O75915                                                                               | 2             | 4.2875           | R.TPMGIVLDALEQQEEGINR.L     | 2            | PRAF3_HUMAN          |
| <b><i>Prefoldin subunit 1 - Homo sapiens (Human)</i></b>                             |               |                  |                             |              |                      |
| O60925                                                                               | 1             | 2.4843           | K.AFTELQAK.V                | 3            | PFD1_HUMAN           |
| O60925                                                                               | 1             | 3.1085           | K.EAIHSQLEK.Q               | 6            | PFD1_HUMAN           |
| O60925                                                                               | 2             | 3.0407           | K.IAEEKIKELEQK.K            | 1            | PFD1_HUMAN           |
| O60925                                                                               | 2             | 4.0963           | K.LADIQIEQLNR.T             | 5            | PFD1_HUMAN           |
| O60925                                                                               | 3             | 4.993            | K.VKLADIQIEQLNR.T           | 2            | PFD1_HUMAN           |
| O60925                                                                               | 2             | 2.9078           | R.MFILQSK.E                 | 1            | PFD1_HUMAN           |
| <b><i>Prefoldin subunit 2 - Homo sapiens (Human)</i></b>                             |               |                  |                             |              |                      |
| Q9UHV9                                                                               | 3             | 4.2081           | R.LMGEDEKPAAKENSEGAGAK.A    | 1            | PFD2_HUMAN           |
| Q9UHV9                                                                               | 2             | 3.0704           | R.M#VGGV LVER.T             | 3            | PFD2_HUMAN           |
| Q9UHV9                                                                               | 2             | 3.7487           | R.LMGEDEKPAAK.E             | 2            | PFD2_HUMAN           |
| Q9UHV9                                                                               | 2             | 3.0183           | R.LM#GEDEKPAAK.E            | 2            | PFD2_HUMAN           |
| Q9UHV9                                                                               | 2             | 3.0574           | K.GKELNEFREK.H              | 2            | PFD2_HUMAN           |
| Q9UHV9                                                                               | 2             | 4.0385           | K.EVLPALENNKEQIQK.I         | 3            | PFD2_HUMAN           |
| Q9UHV9                                                                               | 2             | 4.3255           | K.GAVSAEQVIAGFNR.L          | 6            | PFD2_HUMAN           |
| Q9UHV9                                                                               | 2             | 3.9362           | R.MVGGV LVER.T              | 6            | PFD2_HUMAN           |
| Q9UHV9                                                                               | 2             | 5.1111           | K.IIETLTQQLQAK.G            | 4            | PFD2_HUMAN           |
| <b><i>Prefoldin subunit 3 - Homo sapiens (Human)</i></b>                             |               |                  |                             |              |                      |
| P61758                                                                               | 2             | 3.2343           | K.KKESTNSMETR.F             | 1            | PFD3_HUMAN           |
| P61758                                                                               | 2             | 3.4271           | K.KLDEQYQK.Y                | 4            | PFD3_HUMAN           |
| <b><i>Prefoldin subunit 4 - Homo sapiens (Human)</i></b>                             |               |                  |                             |              |                      |
| Q9NQP4                                                                               | 2             | 4.2864           | K.NLQEEIDALESR.V            | 6            | PFD4_HUMAN           |
| Q9NQP4                                                                               | 2             | 3.8811           | R.ITELKEEIEVK.K             | 3            | PFD4_HUMAN           |
| Q9NQP4                                                                               | 2             | 3.7169           | K.NLQEEIDALESRVESIQR.V      | 2            | PFD4_HUMAN           |
| Q9NQP4                                                                               | 2             | 5.1032           | K.KAAAEDVNVTFEDQQK.I        | 2            | PFD4_HUMAN           |

| <i>Accession No*</i>                                                                           | <i>Charge</i> | <i>XC(Max)**</i> | <i>Peptide*</i>         | <i>TC***</i> | <i>Reference No*</i> |
|------------------------------------------------------------------------------------------------|---------------|------------------|-------------------------|--------------|----------------------|
| Q9NQP4                                                                                         | 2             | 4.351            | K.AAAEDVNVTFFEDQQKINK.F | 1            | PFD4_HUMAN           |
| Q9NQP4                                                                                         | 2             | 4.5229           | K.AAAEDVNVTFFEDQQK.I    | 5            | PFD4_HUMAN           |
| Q9NQP4                                                                                         | 1             | 2.1625           | K.VQLYAK.F              | 1            | PFD4_HUMAN           |
| <b><i>Prefoldin subunit 6 - Homo sapiens (Human)</i></b>                                       |               |                  |                         |              |                      |
| O15212                                                                                         | 2             | 2.969            | K.RLDYITAEIK.R          | 3            | PFD6_HUMAN           |
| O15212                                                                                         | 3             | 4.5308           | K.RLDYITAEIKR.Y         | 1            | PFD6_HUMAN           |
| O15212                                                                                         | 2             | 2.7495           | K.RYESQLR.D             | 1            | PFD6_HUMAN           |
| O15212                                                                                         | 3             | 4.6625           | R.ETLAQLQQEFQR.A        | 5            | PFD6_HUMAN           |
| O15212                                                                                         | 3             | 4.2521           | R.QSEQQRETLAQLQQEFQR.A  | 3            | PFD6_HUMAN           |
| <b><i>Pre-mRNA 3'-end-processing factor FIP1 - Homo sapiens (Human)</i></b>                    |               |                  |                         |              |                      |
| Q6UN15                                                                                         | 3             | 4.3583           | R.KPGADLSDFNYGFNEDTWK.A | 1            | FIP1_HUMAN           |
| Q6UN15                                                                                         | 2             | 3.5849           | R.M#GLEVIPVTSTTNK.I     | 2            | FIP1_HUMAN           |
| Q6UN15                                                                                         | 2             | 5.002            | R.TGNSEKETALPSTK.A      | 4            | FIP1_HUMAN           |
| Q6UN15                                                                                         | 2             | 5.0189           | K.TGAPQYGSYGTAPVNLNIK.T | 5            | FIP1_HUMAN           |
| Q6UN15                                                                                         | 2             | 3.3572           | K.AEFTSPPSLFK.T         | 2            | FIP1_HUMAN           |
| Q6UN15                                                                                         | 2             | 3.7736           | R.ANENSNIQVLSER.S       | 3            | FIP1_HUMAN           |
| <b><i>Pre-mRNA cleavage complex 2 protein Pcf11 - Homo sapiens (Human)</i></b>                 |               |                  |                         |              |                      |
| O94913                                                                                         | 1             | 2.3766           | K.ELDQLDSK.S            | 2            | PCF11_HUMAN          |
| O94913                                                                                         | 3             | 4.4069           | K.TEEERPQETTNQHSTK.S    | 1            | PCF11_HUMAN          |
| <b><i>Pre-mRNA-processing factor 40 homolog A - Homo sapiens (Human)</i></b>                   |               |                  |                         |              |                      |
| O75400                                                                                         | 3             | 4.3363           | R.ALEKEEEEEKQK.S        | 2            | PRP40_HUMAN          |
| <b><i>Pre-mRNA-processing factor 6 - Homo sapiens (Human)</i></b>                              |               |                  |                         |              |                      |
| O94906                                                                                         | 2             | 2.7882           | R.DANDPVDDR.H           | 3            | PRP6_HUMAN           |
| <b><i>Pre-mRNA-splicing factor ATP-dependent RNA helicase PRP16 - Homo sapiens (Human)</i></b> |               |                  |                         |              |                      |
| Q92620                                                                                         | 2             | 3.2492           | R.RNEPESPR.H            | 5            | PRP16_HUMAN          |
| Q92620                                                                                         | 3             | 4.1005           | R.VETPSHPGGVSEEFWER.S   | 1            | PRP16_HUMAN          |
| Q92620                                                                                         | 2             | 4.2506           | R.SQWESPSPTPSYR.D       | 2            | PRP16_HUMAN          |
| Q92620                                                                                         | 2             | 2.8489           | K.SAASEQHVFK.A          | 2            | PRP16_HUMAN          |
| Q92620                                                                                         | 3             | 5.2109           | K.APAPRPSLLGLDLLASLK.R  | 5            | PRP16_HUMAN          |
| Q92620                                                                                         | 2             | 3.433            | R.STWEEEDSGYGSSR.R      | 1            | PRP16_HUMAN          |
| <b><i>Pre-mRNA-splicing factor ISY1 homolog - Homo sapiens (Human)</i></b>                     |               |                  |                         |              |                      |
| Q9ULR0                                                                                         | 2             | 4.5216           | K.VAQIQNAGLGEFR.I       | 3            | ISY1_HUMAN           |
| <b><i>Pre-mRNA-splicing factor RBM22 - Homo sapiens (Human)</i></b>                            |               |                  |                         |              |                      |
| Q9NW64                                                                                         | 2             | 3.2855           | R.EISNSDGTRPVGMLGK.A    | 1            | RBM22_HUMAN          |
| <b><i>Pre-mRNA-splicing factor SLU7 - Homo sapiens (Human)</i></b>                             |               |                  |                         |              |                      |



| <i>Accession No*</i>                                                                               | <i>Charge</i> | <i>XC(Max)**</i> | <i>Peptide*</i>                    | <i>TC***</i> | <i>Reference No*</i> |
|----------------------------------------------------------------------------------------------------|---------------|------------------|------------------------------------|--------------|----------------------|
| O95391                                                                                             | 2             | 3.6087           | R.QRPDDPMASFLGQ.-                  | 1            | SLU7_HUMAN           |
| <b><i>Pre-mRNA-splicing factor SYF2 - Homo sapiens (Human)</i></b>                                 |               |                  |                                    |              |                      |
| O95926                                                                                             | 3             | 4.0565           | R.KLNHQEVVEEDKR.L                  | 1            | SYF2_HUMAN           |
| O95926                                                                                             | 3             | 3.7961           | R.LKLPANWEAK.K                     | 1            | SYF2_HUMAN           |
| O95926                                                                                             | 3             | 3.8473           | R.RRPYNDDADIDYINER.N               | 1            | SYF2_HUMAN           |
| <b><i>Pre-rRNA-processing protein TSR2 homolog - Homo sapiens (Human)</i></b>                      |               |                  |                                    |              |                      |
| Q969E8                                                                                             | 1             | 2.1247           | K.VTATALK.T                        | 1            | TSR2_HUMAN           |
| Q969E8                                                                                             | 2             | 4.245            | K.WLGGAVEDYFMR.N                   | 5            | TSR2_HUMAN           |
| Q969E8                                                                                             | 2             | 4.0959           | K.WLGGAVEDYFM#R.N                  | 3            | TSR2_HUMAN           |
| <b><i>PRKC apoptosis WTI regulator protein - Homo sapiens (Human)</i></b>                          |               |                  |                                    |              |                      |
| Q96IZ0                                                                                             | 2             | 4.3774           | R.LMQDKEEMIGK.L                    | 2            | PAWR_HUMAN           |
| Q96IZ0                                                                                             | 3             | 4.361            | R.YNRDANVSGTLVSSSTLEK.K            | 1            | PAWR_HUMAN           |
| Q96IZ0                                                                                             | 2             | 4.9138           | R.YKSTTSVSEEDVSSR.Y                | 1            | PAWR_HUMAN           |
| Q96IZ0                                                                                             | 3             | 4.8855           | R.RSEDEPPAASASAAPPPQRDEEEPDGVPEK.  | 1            | PAWR_HUMAN           |
| Q96IZ0                                                                                             | 2             | 3.5967           | R.LMQDKEEM#IGK.L                   | 1            | PAWR_HUMAN           |
| Q96IZ0                                                                                             | 2             | 3.7833           | R.LM#QDKEEMIGK.L                   | 1            | PAWR_HUMAN           |
| Q96IZ0                                                                                             | 3             | 5.2555           | R.KREDAITQQNTIQNEAVNLLDPGSSYLLQEPP | 2            | PAWR_HUMAN           |
| Q96IZ0                                                                                             | 2             | 3.6562           | R.DLDDIEDENEQLKQENK.T              | 2            | PAWR_HUMAN           |
| Q96IZ0                                                                                             | 2             | 5.8277           | R.DANVSGTLVSSSTLEK.K               | 10           | PAWR_HUMAN           |
| Q96IZ0                                                                                             | 2             | 3.5072           | K.STTSVSEEDVSSR.Y                  | 3            | PAWR_HUMAN           |
| Q96IZ0                                                                                             | 2             | 3.8135           | K.KIEDLEKEVVR.E                    | 2            | PAWR_HUMAN           |
| Q96IZ0                                                                                             | 3             | 4.1994           | R.SEDEPPAASASAAPPPQRDEEEPDGVPEK.G  | 2            | PAWR_HUMAN           |
| <b><i>PRKR interacting protein 1 - Homo sapiens (Human)</i></b>                                    |               |                  |                                    |              |                      |
| Q96CF8                                                                                             | 2             | 2.9049           | K.IAAEEQTAK.R                      | 1            | Q96CF8_HUMA          |
| Q96CF8                                                                                             | 2             | 3.5825           | K.IAAEEQTAKR.R                     | 2            | Q96CF8_HUMA          |
| <b><i>Probable asparaginyl-tRNA synthetase, mitochondrial precursor - Homo sapiens (Human)</i></b> |               |                  |                                    |              |                      |
| Q96I59                                                                                             | 2             | 3.5497           | R.DALGAQNASGER.I                   | 2            | SYNM_HUMAN           |
| <b><i>Probable ATP-dependent RNA helicase DDX10 - Homo sapiens (Human)</i></b>                     |               |                  |                                    |              |                      |
| Q13206                                                                                             | 2             | 3.8248           | R.SNSEVEDVGPTSHNR.K                | 1            | DDX10_HUMAN          |
| <b><i>Probable ATP-dependent RNA helicase DDX17 - Homo sapiens (Human)</i></b>                     |               |                  |                                    |              |                      |
| Q92841                                                                                             | 2             | 3.3893           | K.GTAYTFFTPGNLK.Q                  | 2            | DDX17_HUMAN          |
| Q92841                                                                                             | 2             | 3.4446           | K.VLEEANQAINPK.L                   | 1            | DDX17_HUMAN          |
| <b><i>Probable ATP-dependent RNA helicase DDX27 - Homo sapiens (Human)</i></b>                     |               |                  |                                    |              |                      |
| Q96GQ7                                                                                             | 2             | 2.9744           | R.AATTLDEKIEK.V                    | 1            | DDX27_HUMAN          |
| <b><i>Probable ATP-dependent RNA helicase DDX49 - Homo sapiens (Human)</i></b>                     |               |                  |                                    |              |                      |

| <i>Accession No*</i>                                                                   | <i>Charge</i> | <i>XC(Max)**</i> | <i>Peptide*</i>                      | <i>TC***</i> | <i>Reference No*</i> |
|----------------------------------------------------------------------------------------|---------------|------------------|--------------------------------------|--------------|----------------------|
| Q9Y6V7                                                                                 | 2             | 3.0602           | R.TPSGSHSGPVPSQGLV.-                 | 2            | DDX49_HUMAN          |
| <b><i>Probable ATP-dependent RNA helicase DDX6 - Homo sapiens (Human)</i></b>          |               |                  |                                      |              |                      |
| P26196                                                                                 | 3             | 6.2287           | R.GPVKPTGGPGGGGTQTQQQM#NQLK.N        | 2            | DDX6_HUMAN           |
| P26196                                                                                 | 3             | 5.2788           | R.GPVKPTGGPGGGGTQTQQQM#NQLK.N        | 1            | DDX6_HUMAN           |
| P26196                                                                                 | 2             | 4.2345           | R.TENPVIM#GLSSQNGQLR.G               | 1            | DDX6_HUMAN           |
| P26196                                                                                 | 2             | 4.8853           | R.TENPVIMGLSSQNGQLR.G                | 3            | DDX6_HUMAN           |
| P26196                                                                                 | 4             | 5.2081           | K.NTNTINNGTQQQAQSM#TTTTIKPGDDWKK.T   | 1            | DDX6_HUMAN           |
| <b><i>Probable D-tyrosyl-tRNA(Tyr) deacylase 1 - Homo sapiens (Human)</i></b>          |               |                  |                                      |              |                      |
| Q8TEA8                                                                                 | 2             | 4.4577           | R.SASSGAEGDVSSEREP.-                 | 7            | DTD1_HUMAN           |
| <b><i>Probable G-protein coupled receptor 124 precursor - Homo sapiens (Human)</i></b> |               |                  |                                      |              |                      |
| Q96PE1                                                                                 | 1             | 2.4217           | R.DSLKGGGALEK.E                      | 2            | GP124_HUMAN          |
| <b><i>Probable helicase senataxin - Homo sapiens (Human)</i></b>                       |               |                  |                                      |              |                      |
| Q7Z333                                                                                 | 2             | 2.7859           | R.SLDYVAQLR.D                        | 1            | SETX_HUMAN           |
| Q7Z333                                                                                 | 2             | 3.3382           | K.SLETSSALSPSLK.N                    | 1            | SETX_HUMAN           |
| Q7Z333                                                                                 | 2             | 3.24             | R.LLTDSSSTDALEK.V                    | 1            | SETX_HUMAN           |
| <b><i>Probable helicase with zinc finger domain - Homo sapiens (Human)</i></b>         |               |                  |                                      |              |                      |
| P42694                                                                                 | 3             | 3.7146           | R.AIAQPGPILPSHLNSFIDENPSGLPIGEALDR.I | 1            | HELZ_HUMAN           |
| <b><i>Probable histone acetyltransferase MYST1 - Homo sapiens (Human)</i></b>          |               |                  |                                      |              |                      |
| Q9H7Z6                                                                                 | 3             | 4.6512           | R.RPDSTWHSAEVIQSR.V                  | 1            | MYST1_HUMAN          |
| <b><i>Probable palmitoyltransferase ZDHHC5 - Homo sapiens (Human)</i></b>              |               |                  |                                      |              |                      |
| Q9C0B5                                                                                 | 2             | 5.1634           | K.SAQTGFELGQLQSIR.S                  | 4            | ZDHC5_HUMAN          |
| Q9C0B5                                                                                 | 2             | 3.4622           | K.SLGSASPGPGQPPLSSPTR.G              | 2            | ZDHC5_HUMAN          |
| <b><i>Probable RNA-binding protein 25 - Homo sapiens (Human)</i></b>                   |               |                  |                                      |              |                      |
| P49756                                                                                 | 2             | 4.5323           | R.DREEDEEDAYER.R                     | 2            | RBM25_HUMAN          |
| <b><i>Probable rRNA-processing protein EBP2 - Homo sapiens (Human)</i></b>             |               |                  |                                      |              |                      |
| Q99848                                                                                 | 2             | 2.9127           | K.KAVNDVNGLK.Q                       | 1            | EBP2_HUMAN           |
| Q99848                                                                                 | 2             | 3.5584           | R.QAQAAVLAVLPR.L                     | 2            | EBP2_HUMAN           |
| Q99848                                                                                 | 2             | 3.215            | K.KVQTEVLQK.R                        | 2            | EBP2_HUMAN           |
| <b><i>Profilin-1 - Homo sapiens (Human)</i></b>                                        |               |                  |                                      |              |                      |
| P07737                                                                                 | 2             | 2.9204           | K.TLVLLMGK.E                         | 3            | PROF1_HUMAN          |
| P07737                                                                                 | 2             | 4.4214           | R.DSLLQDGEFSM#DLR.T                  | 3            | PROF1_HUMAN          |
| P07737                                                                                 | 2             | 5.3726           | K.TFVNITPAEVGVLVGKDR.S               | 5            | PROF1_HUMAN          |
| P07737                                                                                 | 2             | 4.464            | K.TFVNITPAEVGVLVGK.D                 | 1            | PROF1_HUMAN          |
| P07737                                                                                 | 2             | 4.0807           | K.TDKTLVLLMGK.E                      | 3            | PROF1_HUMAN          |
| P07737                                                                                 | 2             | 3.3027           | K.STGGAPTfnvtvk.T                    | 4            | PROF1_HUMAN          |

| <i>Accession No*</i>                                                                            | <i>Charge</i> | <i>XC(Max)**</i> | <i>Peptide*</i>          | <i>TC***</i> | <i>Reference No*</i> |
|-------------------------------------------------------------------------------------------------|---------------|------------------|--------------------------|--------------|----------------------|
| P07737                                                                                          | 2             | 2.8794           | K.EGVHGGLINKK.C          | 1            | PROF1_HUMAN          |
| P07737                                                                                          | 2             | 3.434            | K.DSPSVWAAVPGK.T         | 2            | PROF1_HUMAN          |
| P07737                                                                                          | 2             | 4.1609           | R.SSFYVNGLTGGQK.C        | 2            | PROF1_HUMAN          |
| <b><i>Programmed cell death protein 10 - Homo sapiens (Human)</i></b>                           |               |                  |                          |              |                      |
| Q9BUL8                                                                                          | 2             | 3.3437           | R.VNLSAAQTLR.A           | 2            | PDC10_HUMAN          |
| <b><i>Programmed cell death protein 5 - Homo sapiens (Human)</i></b>                            |               |                  |                          |              |                      |
| O14737                                                                                          | 2             | 2.9381           | R.KVMDSDEDDDY.-          | 1            | PDCD5_HUMAN          |
| O14737                                                                                          | 2             | 2.7227           | R.RKVMDSDEDDDY.-         | 1            | PDCD5_HUMAN          |
| O14737                                                                                          | 1             | 2.9461           | R.YGQLSEK.V              | 11           | PDCD5_HUMAN          |
| O14737                                                                                          | 3             | 4.6627           | R.YGQLSEKVSEQGLIEILKK.V  | 2            | PDCD5_HUMAN          |
| O14737                                                                                          | 2             | 5.1859           | R.NSILAQVLDQSAR.A        | 7            | PDCD5_HUMAN          |
| O14737                                                                                          | 2             | 3.863            | R.LSNLALVKPEK.T          | 4            | PDCD5_HUMAN          |
| O14737                                                                                          | 2             | 4.2403           | K.VSEQGLIEILKK.V         | 6            | PDCD5_HUMAN          |
| O14737                                                                                          | 2             | 4.2151           | K.VSEQGLIEILK.K          | 4            | PDCD5_HUMAN          |
| O14737                                                                                          | 3             | 4.6124           | K.TKAVENYLIQMAR.Y        | 5            | PDCD5_HUMAN          |
| O14737                                                                                          | 3             | 4.0556           | K.TKAVENYLIQM#AR.Y       | 1            | PDCD5_HUMAN          |
| O14737                                                                                          | 2             | 3.7031           | K.AVENYLIQM#AR.Y         | 4            | PDCD5_HUMAN          |
| O14737                                                                                          | 3             | 5.8287           | R.YGQLSEKVSEQGLIEILK.K   | 3            | PDCD5_HUMAN          |
| O14737                                                                                          | 3             | 4.9532           | R.ARLSNLALVKPEK.T        | 1            | PDCD5_HUMAN          |
| <b><i>Proline-rich acidic protein 1 - Homo sapiens (Human)</i></b>                              |               |                  |                          |              |                      |
| Q5VWY4                                                                                          | 3             | 5.0508           | R.VVEPPEKDDQLVLFVQKPK.L  | 1            | Q5VWY4_HUMA          |
| <b><i>Proline-rich AKT1 substrate 1 - Homo sapiens (Human)</i></b>                              |               |                  |                          |              |                      |
| Q96B36                                                                                          | 2             | 2.817            | K.SLPVSPVWGFK.E          | 1            | AKTS1_HUMAN          |
| <b><i>Proline-rich protein 8 - Homo sapiens (Human)</i></b>                                     |               |                  |                          |              |                      |
| Q9NSV0                                                                                          | 2             | 4.4606           | K.NQDVSISNVQPK.T         | 4            | PRR8_HUMAN           |
| Q9NSV0                                                                                          | 2             | 4.2082           | K.VLPIKPADVEEPAVQTPR.V   | 2            | PRR8_HUMAN           |
| Q9NSV0                                                                                          | 2             | 3.9212           | R.TNSGGGDGPHISSK.V       | 1            | PRR8_HUMAN           |
| <b><i>Proline-rich protein PRCC - Homo sapiens (Human)</i></b>                                  |               |                  |                          |              |                      |
| Q92733                                                                                          | 1             | 2.5582           | K.SAALQVTK.Q             | 2            | PRCC_HUMAN           |
| Q92733                                                                                          | 2             | 2.8579           | K.TILQGSSEGTGLSALLPQPK.N | 2            | PRCC_HUMAN           |
| Q92733                                                                                          | 2             | 4.7075           | K.TSSLAPVVGTTTTTSPSAIK.A | 3            | PRCC_HUMAN           |
| <b><i>Proline-serine-threonine phosphatase-interacting protein 1 - Homo sapiens (Human)</i></b> |               |                  |                          |              |                      |
| O43586                                                                                          | 2             | 3.3717           | R.GFVPGSYLEKL.-          | 3            | PPIP1_HUMAN          |
| <b><i>Prolyl 4-hydroxylase subunit alpha-1 precursor - Homo sapiens (Human)</i></b>             |               |                  |                          |              |                      |
| P13674                                                                                          | 2             | 2.9239           | K.SASDDQSDQKTPK.K        | 2            | P4HA1_HUMAN          |

| <i>Accession No*</i>                                                          | <i>Charge</i> | <i>XC(Max)**</i> | <i>Peptide*</i>                  | <i>TC***</i> | <i>Reference No*</i> |
|-------------------------------------------------------------------------------|---------------|------------------|----------------------------------|--------------|----------------------|
| P13674                                                                        | 2             | 4.0563           | R.LQDTYNLDTDTISK.G               | 1            | P4HA1_HUMAN          |
| <b><i>ProSAAS precursor - Homo sapiens (Human)</i></b>                        |               |                  |                                  |              |                      |
| Q9UHG2                                                                        | 2             | 3.6095           | R.NSDPALGLDDDDPDAPAAQLAR.A       | 1            | PCSK1_HUMAN          |
| <b><i>Prostaglandin E synthase 3 - Homo sapiens (Human)</i></b>               |               |                  |                                  |              |                      |
| Q15185                                                                        | 2             | 3.5907           | K.LTFSCLOGGSDNFK.H               | 2            | TEBP_HUMAN           |
| Q15185                                                                        | 2             | 3.9966           | R.KGESGQSWPR.L                   | 4            | TEBP_HUMAN           |
| Q15185                                                                        | 3             | 4.2652           | K.HLNEIDLFCIDPNSDK.H             | 3            | TEBP_HUMAN           |
| <b><i>Proteasome - Homo sapiens (Human)</i></b>                               |               |                  |                                  |              |                      |
| Q5VWC4                                                                        | 3             | 5.6868           | R.AAAASAAEAGIATTGTEGERDSDDALLK.M | 3            | Q5VWC4_HUMA          |
| <b><i>Proteasome activator complex subunit 1 - Homo sapiens (Human)</i></b>   |               |                  |                                  |              |                      |
| Q06323                                                                        | 4             | 6.9024           | K.KISELDAFLKEPALNEANLSNLK.A      | 3            | PSME1_HUMAN          |
| Q06323                                                                        | 2             | 4.3494           | K.TENLLGSYFPK.K                  | 4            | PSME1_HUMAN          |
| <b><i>Proteasome subunit alpha type 1 - Homo sapiens (Human)</i></b>          |               |                  |                                  |              |                      |
| P25786                                                                        | 2             | 3.0704           | K.AQPAQPADEPAEKADPEM#EH.-        | 1            | PSA1_HUMAN           |
| P25786                                                                        | 2             | 2.8462           | K.AQPAQPADEPAEKADPEMEH.-         | 1            | PSA1_HUMAN           |
| P25786                                                                        | 3             | 5.1459           | R.KAQAQPADEPAEKADPEMEH.-         | 2            | PSA1_HUMAN           |
| <b><i>Proteasome subunit alpha type 5 - Homo sapiens (Human)</i></b>          |               |                  |                                  |              |                      |
| P28066                                                                        | 2             | 3.7823           | R.LFQVEYAIEAIK.L                 | 1            | PSA5_HUMAN           |
| <b><i>Proteasome subunit beta type 4 precursor - Homo sapiens (Human)</i></b> |               |                  |                                  |              |                      |
| P28070                                                                        | 2             | 4.0043           | R.TQNPM#VTGTSVLGVK.F             | 2            | PSB4_HUMAN           |
| P28070                                                                        | 2             | 4.0605           | R.TQNPMVTGTSVLGVK.F              | 1            | PSB4_HUMAN           |
| <b><i>Proteasome subunit beta type 6 precursor - Homo sapiens (Human)</i></b> |               |                  |                                  |              |                      |
| P28072                                                                        | 2             | 2.8957           | R.DGSSGGVIR.L                    | 2            | PSB6_HUMAN           |
| P28072                                                                        | 2             | 3.8654           | R.LAAIAESGVER.Q                  | 1            | PSB6_HUMAN           |
| P28072                                                                        | 2             | 2.7965           | R.TTTGSYIANR.V                   | 1            | PSB6_HUMAN           |
| <b><i>Proteasome subunit beta type 9 precursor - Homo sapiens (Human)</i></b> |               |                  |                                  |              |                      |
| P28065                                                                        | 2             | 3.5296           | R.VILGNELPKFYDE.-                | 2            | PSB9_HUMAN           |
| <b><i>Protein 4.1 - Homo sapiens (Human)</i></b>                              |               |                  |                                  |              |                      |
| P11171                                                                        | 3             | 4.5413           | K.KEDEPPEQAEPEPTEAWKVEK.T        | 1            | 41_HUMAN             |
| P11171                                                                        | 2             | 3.0441           | R.ERLDGENIYIR.H                  | 2            | 41_HUMAN             |
| P11171                                                                        | 3             | 4.8014           | R.HSNLMLEDLDKSQEEIKK.H           | 3            | 41_HUMAN             |
| <b><i>Protein ADRM1 - Homo sapiens (Human)</i></b>                            |               |                  |                                  |              |                      |
| Q16186                                                                        | 2             | 3.1261           | K.AMQNNAKPEQK.E                  | 4            | ADRM1_HUMAN          |
| Q16186                                                                        | 2             | 3.6672           | K.DKKDEEEDMSLD.-                 | 1            | ADRM1_HUMAN          |
| <b><i>Protein AF-9 - Homo sapiens (Human)</i></b>                             |               |                  |                                  |              |                      |

| <i>Accession No*</i>                                              | <i>Charge</i> | <i>XC(Max)**</i> | <i>Peptide*</i>                  | <i>TC***</i> | <i>Reference No*</i> |
|-------------------------------------------------------------------|---------------|------------------|----------------------------------|--------------|----------------------|
| P42568                                                            | 2             | 3.5401           | K.RPPISDSEELSAK.K                | 1            | AF9_HUMAN            |
| <b><i>Protein ALO17 - Homo sapiens (Human)</i></b>                |               |                  |                                  |              |                      |
| Q9HCF4                                                            | 2             | 3.0433           | K.TKDEMAAAEEK.V                  | 1            | ALO17_HUMAN          |
| Q9HCF4                                                            | 2             | 4.623            | R.GLSQEGTGPPTSAGEGHSR.T          | 3            | ALO17_HUMAN          |
| Q9HCF4                                                            | 2             | 2.9632           | K.ASWTVQESK.K                    | 3            | ALO17_HUMAN          |
| Q9HCF4                                                            | 2             | 3.9843           | K.TKDEM#AAAEEK.V                 | 3            | ALO17_HUMAN          |
| <b><i>Protein ARMET precursor - Homo sapiens (Human)</i></b>      |               |                  |                                  |              |                      |
| P55145                                                            | 2             | 4.6232           | K.IINEVSKPLAHHIPVEK.I            | 2            | ARMET_HUMAN          |
| P55145                                                            | 3             | 6.1812           | R.FYQDLKDRDVTFSPATIENELIK.F      | 2            | ARMET_HUMAN          |
| P55145                                                            | 2             | 2.7269           | R.KINELMPK.Y                     | 1            | ARMET_HUMAN          |
| P55145                                                            | 3             | 4.3356           | K.DRDVTFSPATIENELIK.F            | 1            | ARMET_HUMAN          |
| <b><i>Protein Associated with Tlr4 - Homo sapiens (Human)</i></b> |               |                  |                                  |              |                      |
| Q8N129                                                            | 2             | 3.1508           | R.ILDYSVHAER.K                   | 1            | Q8N129_HUMAN         |
| Q8N129                                                            | 3             | 5.7632           | R.SREVLELGQVLDTGKR.K             | 3            | Q8N129_HUMAN         |
| Q8N129                                                            | 2             | 3.3718           | R.EVLELGQVLDTGKR.K               | 2            | Q8N129_HUMAN         |
| Q8N129                                                            | 2             | 3.7234           | R.EVLELGQVLDTGK.R                | 1            | Q8N129_HUMAN         |
| Q8N129                                                            | 2             | 4.9535           | K.LLSTELQAEISR.T                 | 7            | Q8N129_HUMAN         |
| <b><i>Protein bicaudal C homolog 1 - Homo sapiens (Human)</i></b> |               |                  |                                  |              |                      |
| Q9H694                                                            | 2             | 3.628            | R.TPTNTWSGLGFSK.S                | 2            | BICC1_HUMAN          |
| Q9H694                                                            | 3             | 4.8216           | K.VLSANHGDPISQTSQSGSEQTSPK.S     | 2            | BICC1_HUMAN          |
| <b><i>Protein bicaudal D homolog 2 - Homo sapiens (Human)</i></b> |               |                  |                                  |              |                      |
| Q8TD16                                                            | 2             | 4.296            | R.LVMEAQPEWLR.A                  | 1            | BICD2_HUMAN          |
| Q8TD16                                                            | 2             | 3.6357           | R.NVLTNTQSENER.L                 | 3            | BICD2_HUMAN          |
| <b><i>Protein BUD31 homolog - Homo sapiens (Human)</i></b>        |               |                  |                                  |              |                      |
| P41223                                                            | 3             | 3.7428           | R.KAPPDGWELIEPTLDELQK.M          | 1            | BUD31_HUMAN          |
| <b><i>Protein C10 - Homo sapiens (Human)</i></b>                  |               |                  |                                  |              |                      |
| Q99622                                                            | 3             | 5.7773           | K.M#LQFVLPVATQIQQEVK.A           | 1            | C10_HUMAN            |
| Q99622                                                            | 3             | 6.5946           | K.MLQFVLPVATQIQQEVK.A            | 6            | C10_HUMAN            |
| Q99622                                                            | 2             | 4.4381           | K.SYEAQDPEIASLSGK.L              | 3            | C10_HUMAN            |
| <b><i>Protein C20orf11 - Homo sapiens (Human)</i></b>             |               |                  |                                  |              |                      |
| Q9NWU2                                                            | 2             | 3.8443           | K.LLLWAQNELDQK.K                 | 2            | CT011_HUMAN          |
| Q9NWU2                                                            | 3             | 3.8833           | R.TLALLAFDSPEESPFGDLLHTM#QR.Q    | 1            | CT011_HUMAN          |
| Q9NWU2                                                            | 2             | 3.2189           | R.LIMNYLVTEGFK.E                 | 1            | CT011_HUMAN          |
| <b><i>Protein capicua homolog - Homo sapiens (Human)</i></b>      |               |                  |                                  |              |                      |
| Q96RK0                                                            | 3             | 4.8347           | K.AQESGQGSTAGPLRPPPPGAGGPATPSK.A | 2            | CIC_HUMAN            |

| <i>Accession No*</i>                                                          | <i>Charge</i> | <i>XC(Max)**</i> | <i>Peptide*</i>           | <i>TC***</i> | <i>Reference No*</i> |
|-------------------------------------------------------------------------------|---------------|------------------|---------------------------|--------------|----------------------|
| <b><i>Protein CASC3 - Homo sapiens (Human)</i></b>                            |               |                  |                           |              |                      |
| O15234                                                                        | 3             | 5.0607           | R.AGFRPVEAGGQHGG.R.S      | 2            | CASC3_HUMAN          |
| O15234                                                                        | 2             | 3.2706           | R.GQTQEEVVRPK.G           | 1            | CASC3_HUMAN          |
| O15234                                                                        | 2             | 4.0447           | R.QSGDQGESTEPVENK.V       | 3            | CASC3_HUMAN          |
| O15234                                                                        | 3             | 3.7362           | R.RTPQPVTIKPPPPEVSR.G     | 1            | CASC3_HUMAN          |
| O15234                                                                        | 2             | 2.7301           | R.TGALHLR.R               | 1            | CASC3_HUMAN          |
| <b><i>Protein CDV3 homolog - Homo sapiens (Human)</i></b>                     |               |                  |                           |              |                      |
| Q9UKY7                                                                        | 2             | 3.777            | R.GRDEVSKNQALK.L          | 2            | Q9UKY7_HUMA          |
| <b><i>Protein cordon-bleu - Homo sapiens (Human)</i></b>                      |               |                  |                           |              |                      |
| O75128                                                                        | 2             | 3.5757           | R.GPPSTPVPTQTQNPE.S.R.L   | 2            | COBL_HUMAN           |
| <b><i>Protein CutA precursor - Homo sapiens (Human)</i></b>                   |               |                  |                           |              |                      |
| O60888                                                                        | 2             | 5.5726           | K.GKIEEDSEVLMMIK.T        | 4            | CUTA_HUMAN           |
| O60888                                                                        | 2             | 3.0535           | K.TQSSLVPALTD.F.V.R.S     | 1            | CUTA_HUMAN           |
| <b><i>Protein CWC15 homolog - Homo sapiens (Human)</i></b>                    |               |                  |                           |              |                      |
| Q9P013                                                                        | 2             | 3.3598           | K.GEGDLSQLSK.Q            | 2            | CWC15_HUMAN          |
| Q9P013                                                                        | 3             | 4.0822           | R.GKGEGDLSQLSK.Q          | 2            | CWC15_HUMAN          |
| Q9P013                                                                        | 2             | 3.2008           | R.RWDDDVVFK.N             | 3            | CWC15_HUMAN          |
| <b><i>Protein DEK - Homo sapiens (Human)</i></b>                              |               |                  |                           |              |                      |
| P35659                                                                        | 1             | 2.116            | K.SLIVEGK.R               | 1            | DEK_HUMAN            |
| P35659                                                                        | 2             | 2.983            | R.LTMQVSSLQREPFTIAQ.G.K.G | 1            | DEK_HUMAN            |
| P35659                                                                        | 2             | 3.9111           | R.LTMQVSSLQR.E            | 3            | DEK_HUMAN            |
| P35659                                                                        | 2             | 3.4026           | R.LTM#QVSSLQR.E           | 4            | DEK_HUMAN            |
| P35659                                                                        | 2             | 4.357            | K.NVGQFSGFPFEK.G          | 4            | DEK_HUMAN            |
| P35659                                                                        | 2             | 3.4839           | K.LLYNRPGTVSSLK.K         | 1            | DEK_HUMAN            |
| P35659                                                                        | 2             | 4.3044           | K.LLASANLEEVTM#K.Q        | 2            | DEK_HUMAN            |
| P35659                                                                        | 2             | 4.7454           | K.KNVGQFSGFPFEK.G         | 3            | DEK_HUMAN            |
| P35659                                                                        | 2             | 5.2156           | K.KLLASANLEEVTMK.Q        | 1            | DEK_HUMAN            |
| P35659                                                                        | 1             | 2.5155           | R.EPFTIAQGK.G             | 2            | DEK_HUMAN            |
| <b><i>Protein DGCR14 - Homo sapiens (Human)</i></b>                           |               |                  |                           |              |                      |
| Q96DF8                                                                        | 2             | 3.0666           | R.EAGEAGAATSK.Q           | 2            | DGC14_HUMAN          |
| Q96DF8                                                                        | 3             | 5.1437           | R.HAWLYQAEEEFEK.R.Q       | 1            | DGC14_HUMAN          |
| Q96DF8                                                                        | 2             | 3.0782           | K.REAGEAGAATSK.Q          | 1            | DGC14_HUMAN          |
| Q96DF8                                                                        | 2             | 3.1748           | K.GLSPAMSPALQR.L          | 1            | DGC14_HUMAN          |
| Q96DF8                                                                        | 3             | 3.821            | R.VLDEEYIEGLQTVIQR.D      | 1            | DGC14_HUMAN          |
| <b><i>Protein disulfide-isomerase A3 precursor - Homo sapiens (Human)</i></b> |               |                  |                           |              |                      |

| <i>Accession No*</i> | <i>Charge</i> | <i>XC(Max)**</i> | <i>Peptide*</i>                  | <i>TC***</i> | <i>Reference No*</i> |
|----------------------|---------------|------------------|----------------------------------|--------------|----------------------|
| P30101               | 2             | 4.1279           | R.YLKSEPIPESNDGPVK.V             | 3            | PDIA3_HUMAN          |
| P30101               | 2             | 2.8197           | R.FLQDYFDGNLK.R                  | 1            | PDIA3_HUMAN          |
| P30101               | 2             | 4.1158           | R.DGEEAGAYDGPR.T                 | 12           | PDIA3_HUMAN          |
| P30101               | 2             | 3.6687           | R.EATNPPVIQEEKPK.K               | 4            | PDIA3_HUMAN          |
| P30101               | 2             | 2.8583           | R.EATNPPVIQEEKPK.K               | 2            | PDIA3_HUMAN          |
| P30101               | 2             | 3.8483           | R.ELSDFISYLQR.E                  | 3            | PDIA3_HUMAN          |
| P30101               | 2             | 3.8321           | R.FLQDYFDGNLK.R.Y                | 4            | PDIA3_HUMAN          |
| P30101               | 2             | 3.305            | R.GFPTIYFSPANKK.L                | 3            | PDIA3_HUMAN          |
| P30101               | 3             | 4.1765           | R.KTFSHELSDFGLESTAGEIPVVAIR.T    | 2            | PDIA3_HUMAN          |
| P30101               | 2             | 3.6416           | K.YGVSGYPTLK.I                   | 6            | PDIA3_HUMAN          |
| P30101               | 2             | 3.949            | R.TADGIVSHLKK.Q                  | 2            | PDIA3_HUMAN          |
| P30101               | 3             | 4.5321           | K.RLAPEYEEAAATRLK.G              | 2            | PDIA3_HUMAN          |
| P30101               | 2             | 3.2085           | R.LAPEYEEAATR.L                  | 7            | PDIA3_HUMAN          |
| P30101               | 2             | 3.1874           | K.LNFAVASR.K                     | 3            | PDIA3_HUMAN          |
| P30101               | 3             | 5.9548           | K.FISDKDASIVGFFDDSFSEAHSEFLK.A   | 2            | PDIA3_HUMAN          |
| P30101               | 2             | 5.6333           | K.TFSHELSDFGLESTAGEIPVVAIR.T     | 1            | PDIA3_HUMAN          |
| P30101               | 2             | 5.3003           | K.IFRDGEEAGAYDGPR.T              | 9            | PDIA3_HUMAN          |
| P30101               | 2             | 3.4329           | K.VDCTANTNTCNK.Y                 | 2            | PDIA3_HUMAN          |
| P30101               | 2             | 4.469            | K.LSKDPNIVIAK.M                  | 4            | PDIA3_HUMAN          |
| P30101               | 2             | 4.2748           | K.M#DATANDVPSPYEVR.G             | 2            | PDIA3_HUMAN          |
| P30101               | 3             | 4.3602           | K.M#DATANDVPSPYEVRGFPTIYFSPANK.K | 1            | PDIA3_HUMAN          |
| P30101               | 2             | 4.3975           | K.MDATANDVPSPYEVR.G              | 5            | PDIA3_HUMAN          |
| P30101               | 2             | 4.6644           | K.RLAPEYEEAAATR.L                | 4            | PDIA3_HUMAN          |
| P30101               | 2             | 3.2064           | K.SEPIPESNDGPVK.V                | 2            | PDIA3_HUMAN          |
| P30101               | 2             | 3.2204           | K.FVMQEEFSR.D                    | 4            | PDIA3_HUMAN          |

***Protein disulfide-isomerase A4 precursor - Homo sapiens (Human)***

|        |   |        |                         |   |             |
|--------|---|--------|-------------------------|---|-------------|
| P13667 | 2 | 3.6493 | K.M#DATANDVPSDR.Y       | 3 | PDIA4_HUMAN |
| P13667 | 3 | 4.8459 | R.YKVEGFPTIYFAPSGDK.K   | 1 | PDIA4_HUMAN |
| P13667 | 2 | 3.7069 | K.YGIVDYMIEQSGPPSK.E    | 2 | PDIA4_HUMAN |
| P13667 | 2 | 3.1608 | K.VDATAETDLAKR.F        | 2 | PDIA4_HUMAN |
| P13667 | 3 | 5.0038 | R.YKVEGFPTIYFAPSGDKK.N  | 2 | PDIA4_HUMAN |
| P13667 | 2 | 4.0203 | K.VDATAETDLAK.R         | 4 | PDIA4_HUMAN |
| P13667 | 3 | 4.2569 | K.KGQAVDYEGSRTQEEIVAK.V | 1 | PDIA4_HUMAN |
| P13667 | 2 | 3.7675 | K.KGQAVDYEGSR.T         | 2 | PDIA4_HUMAN |
| P13667 | 2 | 4.8611 | K.IDATSASVLASR.F        | 4 | PDIA4_HUMAN |
| P13667 | 2 | 3.3023 | K.RFDVSGYPTLK.I         | 2 | PDIA4_HUMAN |

| <i>Accession No*</i>                                                          | <i>Charge</i> | <i>XC(Max)**</i> | <i>Peptide*</i>                    | <i>TC***</i> | <i>Reference No*</i> |
|-------------------------------------------------------------------------------|---------------|------------------|------------------------------------|--------------|----------------------|
| P13667                                                                        | 2             | 3.5448           | K.MDATANDVPSDRYK.V                 | 1            | PDIA4_HUMAN          |
| <b><i>Protein disulfide-isomerase A6 precursor - Homo sapiens (Human)</i></b> |               |                  |                                    |              |                      |
| Q15084                                                                        | 2             | 3.6757           | K.NRPEDYQGGR.T                     | 2            | PDIA6_HUMAN          |
| Q15084                                                                        | 2             | 2.7821           | R.TRSDIVSR.A                       | 1            | PDIA6_HUMAN          |
| Q15084                                                                        | 3             | 6.1545           | K.VGAVDADKHHSLGGQYGVQGFPTIK.I      | 2            | PDIA6_HUMAN          |
| Q15084                                                                        | 2             | 4.1305           | K.NLEPEWAAAAASEVKEQTK.G            | 1            | PDIA6_HUMAN          |
| Q15084                                                                        | 2             | 3.2492           | K.NLEPEWAAAAASEVK.E                | 2            | PDIA6_HUMAN          |
| Q15084                                                                        | 2             | 5.366            | K.LAAVDATVNQVLASR.Y                | 3            | PDIA6_HUMAN          |
| Q15084                                                                        | 2             | 3.9857           | K.GSFSEQGINEFLR.E                  | 2            | PDIA6_HUMAN          |
| Q15084                                                                        | 2             | 3.33             | K.AATALKDVVK.V                     | 2            | PDIA6_HUMAN          |
| Q15084                                                                        | 2             | 4.6644           | R.TGEAIVDAALSALR.Q                 | 6            | PDIA6_HUMAN          |
| <b><i>Protein disulfide-isomerase precursor - Homo sapiens (Human)</i></b>    |               |                  |                                    |              |                      |
| P07237                                                                        | 2             | 3.9599           | R.NNFEGEVTKENLLDFIK.H              | 1            | PDIA1_HUMAN          |
| P07237                                                                        | 2             | 3.1338           | R.ILEFFGLK.K                       | 2            | PDIA1_HUMAN          |
| P07237                                                                        | 2             | 5.2602           | K.VDATEESDLAQYGVGR.G               | 24           | PDIA1_HUMAN          |
| P07237                                                                        | 3             | 4.0537           | K.VLVGKNFEDVAFDEKK.N               | 1            | PDIA1_HUMAN          |
| P07237                                                                        | 2             | 3.1516           | K.THILLFLPK.S                      | 5            | PDIA1_HUMAN          |
| P07237                                                                        | 3             | 4.5617           | K.YQLDKDGVVLFK.K                   | 9            | PDIA1_HUMAN          |
| P07237                                                                        | 3             | 4.9157           | K.YQLDKDGVVLFKK.F                  | 6            | PDIA1_HUMAN          |
| P07237                                                                        | 2             | 2.8274           | R.EADDIVNWLK.K                     | 4            | PDIA1_HUMAN          |
| P07237                                                                        | 2             | 3.2074           | R.EADDIVNWLKK.R                    | 2            | PDIA1_HUMAN          |
| P07237                                                                        | 2             | 2.9503           | R.ILEFFGLKK.E                      | 1            | PDIA1_HUMAN          |
| P07237                                                                        | 2             | 5.29             | R.KSNFAEALAAHK.Y                   | 7            | PDIA1_HUMAN          |
| P07237                                                                        | 2             | 5.8809           | R.LAKVDATEESDLAQYGVGR.G            | 5            | PDIA1_HUMAN          |
| P07237                                                                        | 2             | 3.6736           | R.LITLEEEM#TK.Y                    | 4            | PDIA1_HUMAN          |
| P07237                                                                        | 2             | 2.9211           | K.TAAESFKGK.I                      | 2            | PDIA1_HUMAN          |
| P07237                                                                        | 2             | 4.3143           | R.NGDTASPKEYTAGR.E                 | 1            | PDIA1_HUMAN          |
| P07237                                                                        | 3             | 3.8313           | K.VDATEESDLAQYGVGRGYPTIK.F         | 1            | PDIA1_HUMAN          |
| P07237                                                                        | 3             | 3.9492           | R.TGPAATTLPDGAAAESLVESSEVAVIGFFKDV | 1            | PDIA1_HUMAN          |
| P07237                                                                        | 1             | 2.4718           | R.TLDGFKK.F                        | 3            | PDIA1_HUMAN          |
| P07237                                                                        | 2             | 2.7984           | R.TVIDYNGER.T                      | 4            | PDIA1_HUMAN          |
| P07237                                                                        | 1             | 3.32             | R.LITLEEEMTK.Y                     | 6            | PDIA1_HUMAN          |
| P07237                                                                        | 3             | 4.0476           | K.IKPHLMSQELPEDWDKQPVK.V           | 1            | PDIA1_HUMAN          |
| P07237                                                                        | 3             | 4.128            | K.YKPESEELTAER.I                   | 3            | PDIA1_HUMAN          |
| P07237                                                                        | 1             | 2.2461           | K.TAAESFK.G                        | 1            | PDIA1_HUMAN          |
| P07237                                                                        | 2             | 3.5457           | K.AAGKLKAESEIR.L                   | 2            | PDIA1_HUMAN          |



| <i>Accession No*</i> | <i>Charge</i> | <i>XC(Max)**</i> | <i>Peptide*</i>                  | <i>TC***</i> | <i>Reference No*</i> |
|----------------------|---------------|------------------|----------------------------------|--------------|----------------------|
| P07237               | 2             | 2.7319           | K.EYTAGREADDIVNWLK.K             | 1            | PDIA1_HUMAN          |
| P07237               | 3             | 5.4606           | K.FDEGRNNFEGETKENLLDFIK.H        | 4            | PDIA1_HUMAN          |
| P07237               | 2             | 3.255            | K.FFPASADRTVIDYNGER.T            | 1            | PDIA1_HUMAN          |
| P07237               | 3             | 4.7608           | K.FLESGGQDGAGDDDDLEDLEEAEPPDMEED | 1            | PDIA1_HUMAN          |
| P07237               | 3             | 3.9634           | K.IKPHLM#SQELPEDWDKQPVK.V        | 1            | PDIA1_HUMAN          |
| P07237               | 2             | 3.3228           | K.ILFIFIDSDHTDNQR.I              | 2            | PDIA1_HUMAN          |
| P07237               | 2             | 3.8417           | K.NFEDVAFDEKK.N                  | 4            | PDIA1_HUMAN          |
| P07237               | 2             | 4.2668           | K.SVSDYDGKLSNFK.T                | 7            | PDIA1_HUMAN          |
| P07237               | 1             | 2.6015           | K.SVSDYDGK.L                     | 6            | PDIA1_HUMAN          |
| P07237               | 3             | 4.8099           | K.HNQLPLVIEFTEQTAPK.I            | 1            | PDIA1_HUMAN          |
| P07237               | 3             | 4.1383           | K.QLAPIWDKLGETYKDHENIVIAK.M      | 1            | PDIA1_HUMAN          |
| P07237               | 2             | 4.3787           | K.LGETYKDHENIVIAK.M              | 3            | PDIA1_HUMAN          |
| P07237               | 2             | 2.7023           | K.NFEDVAFDEK.K                   | 1            | PDIA1_HUMAN          |
| P07237               | 2             | 4.0777           | K.MDSTANEVEAVK.V                 | 8            | PDIA1_HUMAN          |
| P07237               | 2             | 3.9896           | K.M#DSTANEVEAVK.V                | 6            | PDIA1_HUMAN          |
| P07237               | 2             | 2.7893           | K.LKAEGSEIR.L                    | 2            | PDIA1_HUMAN          |
| P07237               | 2             | 4.1626           | K.SNFAEALAAHK.Y                  | 7            | PDIA1_HUMAN          |

***Protein DJ-1 - Homo sapiens (Human)***

|        |   |        |                                |   |             |
|--------|---|--------|--------------------------------|---|-------------|
| Q99497 | 2 | 5.2153 | K.VTVAGLAGKDPVQCSR.D           | 9 | PARK7_HUMAN |
| Q99497 | 1 | 2.231  | K.APLVLKD.-                    | 3 | PARK7_HUMAN |
| Q99497 | 3 | 7.6725 | R.KGLIAAICAGPTALLAHEIGFGSK.V   | 3 | PARK7_HUMAN |
| Q99497 | 3 | 5.6919 | R.GPGTSFEFALAIVEALNGKEVAAQVK.A | 5 | PARK7_HUMAN |
| Q99497 | 3 | 4.3587 | R.GPGTSFEFALAIVEALNGK.E        | 3 | PARK7_HUMAN |
| Q99497 | 2 | 3.9174 | R.DVICPDASLEDAKK.E             | 2 | PARK7_HUMAN |
| Q99497 | 2 | 3.5171 | K.GAEEM#ETVIPVDVM#R.R          | 2 | PARK7_HUMAN |
| Q99497 | 1 | 2.1465 | K.EVAAQVK.A                    | 1 | PARK7_HUMAN |
| Q99497 | 2 | 3.0498 | K.EILKEQENRK.G                 | 3 | PARK7_HUMAN |
| Q99497 | 2 | 3.8921 | K.EGPDYVVVLPGGNLGAQNLSESAVK.E  | 3 | PARK7_HUMAN |
| Q99497 | 2 | 3.3857 | K.DGLILTSR.G                   | 4 | PARK7_HUMAN |
| Q99497 | 2 | 3.4824 | K.GAEEMETVIPVDVMRR.A           | 2 | PARK7_HUMAN |

***Protein ENL - Homo sapiens (Human)***

|        |   |        |                   |   |           |
|--------|---|--------|-------------------|---|-----------|
| Q03111 | 3 | 3.7176 | K.RPATADSPKPSAK.K | 1 | ENL_HUMAN |
|--------|---|--------|-------------------|---|-----------|

***Protein FAM101B - Homo sapiens (Human)***

|        |   |        |                   |   |             |
|--------|---|--------|-------------------|---|-------------|
| Q8N5W9 | 2 | 3.3793 | R.LSLQDVPELVDAK.K | 2 | F101B_HUMAN |
|--------|---|--------|-------------------|---|-------------|

***Protein FAM103A1 - Homo sapiens (Human)***

| <i>Accession No*</i>                                  | <i>Charge</i> | <i>XC(Max)**</i> | <i>Peptide*</i>                   | <i>TC***</i> | <i>Reference No*</i> |
|-------------------------------------------------------|---------------|------------------|-----------------------------------|--------------|----------------------|
| Q9BTL3                                                | 3             | 5.1193           | K.RPPESPPIVEEWNSR.A               | 6            | F103A_HUMAN          |
| Q9BTL3                                                | 2             | 4.7287           | R.FTENDKEYQEYLK.R                 | 4            | F103A_HUMAN          |
| <b><i>Protein FAM110C - Homo sapiens (Human)</i></b>  |               |                  |                                   |              |                      |
| Q1W6H9                                                | 2             | 3.4669           | R.SAAPSSVPAAPPGPEPR.V             | 3            | F110C_HUMAN          |
| Q1W6H9                                                | 3             | 4.8464           | R.TGDEGKAGNPETVPTTPGPAADPATPETPAP | 2            | F110C_HUMAN          |
| <b><i>Protein FAM114A2 - Homo sapiens (Human)</i></b> |               |                  |                                   |              |                      |
| Q9NRY5                                                | 2             | 4.3614           | K.NSESVDQGAKPESK.S                | 3            | F1142_HUMAN          |
| <b><i>Protein FAM122A - Homo sapiens (Human)</i></b>  |               |                  |                                   |              |                      |
| Q96E09                                                | 1             | 2.1738           | R.NSTTFPSR.H                      | 1            | F122A_HUMAN          |
| Q96E09                                                | 2             | 3.3927           | R.HGLLLPASPVR.M                   | 5            | F122A_HUMAN          |
| Q96E09                                                | 3             | 3.9698           | R.LHQIKQEEGMDLINR.E               | 1            | F122A_HUMAN          |
| <b><i>Protein FAM122B - Homo sapiens (Human)</i></b>  |               |                  |                                   |              |                      |
| Q7Z309                                                | 2             | 3.1164           | R.KGEMETESQPK.R                   | 1            | F122B_HUMAN          |
| <b><i>Protein FAM125A - Homo sapiens (Human)</i></b>  |               |                  |                                   |              |                      |
| Q96EY5                                                | 2             | 5.2248           | R.DM#QGLSLDAASQPSK.G              | 6            | F125A_HUMAN          |
| <b><i>Protein FAM126B - Homo sapiens (Human)</i></b>  |               |                  |                                   |              |                      |
| Q8IXS8                                                | 3             | 4.5911           | K.QYVQQPTDLSVDSVELTPMKK.H         | 2            | F126B_HUMAN          |
| Q8IXS8                                                | 3             | 3.9504           | R.KQYVQQPTDLSVDSVELTPMKK.H        | 1            | F126B_HUMAN          |
| <b><i>Protein FAM136A - Homo sapiens (Human)</i></b>  |               |                  |                                   |              |                      |
| Q96C01                                                | 2             | 2.9809           | R.VQEAVESM#VK.S                   | 2            | F136A_HUMAN          |
| <b><i>Protein FAM21C - Homo sapiens (Human)</i></b>   |               |                  |                                   |              |                      |
| Q9Y4E1                                                | 2             | 4.3335           | K.TSLFEEDKEDDLFAIAK.D             | 5            | FA21C_HUMAN          |
| Q9Y4E1                                                | 3             | 6.7097           | R.KVQSTADIFGDEEGDLFKEK.A          | 2            | FA21C_HUMAN          |
| Q9Y4E1                                                | 3             | 4.275            | K.KTSLFEEDKEDDLFAIAK.D            | 1            | FA21C_HUMAN          |
| Q9Y4E1                                                | 2             | 4.5846           | K.KQTLSQLAQREEK.A                 | 1            | FA21C_HUMAN          |
| Q9Y4E1                                                | 4             | 4.8403           | K.IPAGAVSVFLGDTDFVGAASVPSLKEPQKPE | 1            | FA21C_HUMAN          |
| Q9Y4E1                                                | 2             | 3.3206           | K.GLFSDEEDSEDLFSSQSASNLK.G        | 3            | FA21C_HUMAN          |
| <b><i>Protein FAM32A - Homo sapiens (Human)</i></b>   |               |                  |                                   |              |                      |
| Q9Y421                                                | 2             | 2.7728           | K.LLEAM#GTSK.K                    | 1            | FA32A_HUMAN          |
| Q9Y421                                                | 2             | 2.7077           | R.TPAQAAFEK.M                     | 1            | FA32A_HUMAN          |
| Q9Y421                                                | 2             | 3.09             | K.GVAELGVTKR.K                    | 3            | FA32A_HUMAN          |
| <b><i>Protein FAM43A - Homo sapiens (Human)</i></b>   |               |                  |                                   |              |                      |
| Q8N2R8                                                | 2             | 3.6527           | R.QADGASADEPHSG.-                 | 3            | FA43A_HUMAN          |
| <b><i>Protein FAM44A - Homo sapiens (Human)</i></b>   |               |                  |                                   |              |                      |
| Q8NFC6                                                | 2             | 2.8764           | K.DVQQESSEQKNK.S                  | 1            | FA44A_HUMAN          |

| <i>Accession No*</i>                                                 | <i>Charge</i> | <i>XC(Max)**</i> | <i>Peptide*</i>                        | <i>TC***</i> | <i>Reference No*</i> |
|----------------------------------------------------------------------|---------------|------------------|----------------------------------------|--------------|----------------------|
| Q8NFC6                                                               | 3             | 3.7186           | K.KLPSQPTTDTSTDKER.T                   | 1            | FA44A_HUMAN          |
| Q8NFC6                                                               | 2             | 3.5422           | R.TSEDMADKEK.S                         | 3            | FA44A_HUMAN          |
| <b><i>Protein FAM50A - Homo sapiens (Human)</i></b>                  |               |                  |                                        |              |                      |
| Q14320                                                               | 2             | 2.7846           | R.IAEENIM#K.S                          | 1            | FA50A_HUMAN          |
| Q14320                                                               | 2             | 2.9945           | R.IAEENIMK.S                           | 3            | FA50A_HUMAN          |
| Q14320                                                               | 3             | 4.4877           | K.KFSAHYDAVEAELK.S                     | 2            | FA50A_HUMAN          |
| <b><i>Protein FAM65B - Homo sapiens (Human)</i></b>                  |               |                  |                                        |              |                      |
| Q9Y4F9                                                               | 2             | 3.5853           | R.SQSFAGFSGLQER.R                      | 2            | FA65B_HUMAN          |
| <b><i>Protein FAM76B - Homo sapiens (Human)</i></b>                  |               |                  |                                        |              |                      |
| Q5HYJ3                                                               | 2             | 3.3555           | K.ADFQYQESNLR.T                        | 1            | FA76B_HUMAN          |
| Q5HYJ3                                                               | 2             | 2.9679           | K.ISNLSPEEEQGLWK.Q                     | 1            | FA76B_HUMAN          |
| Q5HYJ3                                                               | 2             | 2.804            | K.SSATIQNETPK.K                        | 1            | FA76B_HUMAN          |
| <b><i>Protein FAM83H - Homo sapiens (Human)</i></b>                  |               |                  |                                        |              |                      |
| Q6ZRV2                                                               | 2             | 3.2183           | K.EEASSPGAGEGPAEEGTR.D                 | 2            | Q6ZRV2_HUMA          |
| Q6ZRV2                                                               | 2             | 5.4256           | R.DPGGGAGAITVASHSK.A                   | 4            | Q6ZRV2_HUMA          |
| <b><i>Protein fosB - Homo sapiens (Human)</i></b>                    |               |                  |                                        |              |                      |
| P53539                                                               | 2             | 4.068            | K.IPYEEGPGGPLAEVR.D                    | 1            | FOSB_HUMAN           |
| <b><i>Protein fucU homolog - Homo sapiens (Human)</i></b>            |               |                  |                                        |              |                      |
| A2VDF0                                                               | 2             | 3.9991           | R.ADGLGIPQLLEAVLK.L                    | 1            | CJ125_HUMAN          |
| <b><i>Protein HEG homolog 1 precursor - Homo sapiens (Human)</i></b> |               |                  |                                        |              |                      |
| Q9ULI3                                                               | 2             | 3.2095           | K.SGTASEMGTER.A                        | 1            | HEG1_HUMAN           |
| <b><i>Protein KIAA0284 - Homo sapiens (Human)</i></b>                |               |                  |                                        |              |                      |
| Q9Y4F5                                                               | 2             | 3.1515           | R.SHTSTATQTPR.A                        | 1            | K0284_HUMAN          |
| Q9Y4F5                                                               | 2             | 3.6985           | R.SGPGPELDSEQPSR.L                     | 1            | K0284_HUMAN          |
| Q9Y4F5                                                               | 2             | 3.3008           | R.RKPAAPPPSPAAR.E                      | 1            | K0284_HUMAN          |
| Q9Y4F5                                                               | 2             | 4.345            | R.LGDASDTEAADGER.G                     | 2            | K0284_HUMAN          |
| Q9Y4F5                                                               | 3             | 4.3276           | R.GPVL AHL P SSD VMAS NHET PEAT GAGR.L | 1            | K0284_HUMAN          |
| Q9Y4F5                                                               | 3             | 4.0658           | R.GDRDESDDGGVAQR.M                     | 2            | K0284_HUMAN          |
| Q9Y4F5                                                               | 3             | 3.7418           | K.QLEVINAIVDPGSLDLLTGNR.S              | 1            | K0284_HUMAN          |
| Q9Y4F5                                                               | 2             | 3.7092           | R.APGEPTPASFFIGDQNGDAVLSR.K            | 1            | K0284_HUMAN          |
| <b><i>Protein KIAA1107 - Homo sapiens (Human)</i></b>                |               |                  |                                        |              |                      |
| Q9UPP5                                                               | 2             | 5.0781           | R.SEDYDAGGSQDDDGSNDR.G                 | 1            | Q9UPP5_HUMA          |
| Q9UPP5                                                               | 2             | 3.5942           | K.TQGSQGESPNSVK.S                      | 2            | Q9UPP5_HUMA          |
| <b><i>Protein KIAA1191 - Homo sapiens (Human)</i></b>                |               |                  |                                        |              |                      |
| Q6IA24                                                               | 3             | 3.747            | R.GWFTSGSSTALPGPNPSTMDSGSGDKDR.N       | 1            | Q6IA24_HUMAN         |

| <i>Accession No*</i>                                                                                   | <i>Charge</i> | <i>XC(Max)**</i> | <i>Peptide*</i>              | <i>TC***</i> | <i>Reference No*</i> |
|--------------------------------------------------------------------------------------------------------|---------------|------------------|------------------------------|--------------|----------------------|
| <b><i>Protein KIAA1430 - Homo sapiens (Human)</i></b>                                                  |               |                  |                              |              |                      |
| Q9P2B7                                                                                                 | 2             | 3.8147           | K.STETQPSSTTPK.C             | 2            | Q9P2B7_HUMA          |
| <b><i>Protein KIAA1522 - Homo sapiens (Human)</i></b>                                                  |               |                  |                              |              |                      |
| Q9P206                                                                                                 | 3             | 4.5637           | K.GGGPPREDVGAPLVTPSLLQM#VR.L | 1            | Q9P206_HUMAN         |
| Q9P206                                                                                                 | 3             | 4.4375           | K.GGGPPREDVGAPLVTPSLLQMVR.L  | 1            | Q9P206_HUMAN         |
| Q9P206                                                                                                 | 2             | 3.1618           | R.FSSVSSPQPR.S               | 1            | Q9P206_HUMAN         |
| Q9P206                                                                                                 | 2             | 3.2017           | R.SGPQILTPLGDR.F             | 1            | Q9P206_HUMAN         |
| <b><i>Protein KIAA1967 - Homo sapiens (Human)</i></b>                                                  |               |                  |                              |              |                      |
| Q8N163                                                                                                 | 2             | 3.414            | K.AAYNPGQAVPWNAVK.V          | 2            | K1967_HUMAN          |
| <b><i>Protein kinase C and casein kinase substrate in neurons protein 2 - Homo sapiens (Human)</i></b> |               |                  |                              |              |                      |
| Q9UNF0                                                                                                 | 2             | 2.8764           | R.AADAVEDLR.W                | 1            | PACN2_HUMAN          |
| Q9UNF0                                                                                                 | 2             | 5.2414           | R.ALVDYEGQEHELSFK.A          | 3            | PACN2_HUMAN          |
| Q9UNF0                                                                                                 | 1             | 2.1934           | K.NVSSYEK.T                  | 1            | PACN2_HUMAN          |
| Q9UNF0                                                                                                 | 2             | 3.6374           | K.HLDLSNVAGYK.A              | 2            | PACN2_HUMAN          |
| Q9UNF0                                                                                                 | 3             | 4.7452           | K.AGDELTKMEDEDEQGWCK.G       | 1            | PACN2_HUMAN          |
| <b><i>Protein KR11 homolog - Homo sapiens (Human)</i></b>                                              |               |                  |                              |              |                      |
| Q8N9T8                                                                                                 | 2             | 3.5321           | K.AQEEADYIEWLK.G             | 1            | KR11_HUMAN           |
| <b><i>Protein LAP2 - Homo sapiens (Human)</i></b>                                                      |               |                  |                              |              |                      |
| Q96RT1                                                                                                 | 2             | 3.3743           | K.LITNDTFQPEIM#ER.S          | 1            | LAP2_HUMAN           |
| Q96RT1                                                                                                 | 2             | 2.8081           | K.STEDLSPQK.S                | 1            | LAP2_HUMAN           |
| Q96RT1                                                                                                 | 3             | 3.9796           | R.LKDEETNEDSGR.D             | 1            | LAP2_HUMAN           |
| Q96RT1                                                                                                 | 2             | 2.925            | R.SESENQSYAK.H               | 1            | LAP2_HUMAN           |
| <b><i>Protein LAP4 - Homo sapiens (Human)</i></b>                                                      |               |                  |                              |              |                      |
| Q14160                                                                                                 | 2             | 3.0838           | R.QSPASPPPLGGGAPVR.T         | 1            | LAP4_HUMAN           |
| Q14160                                                                                                 | 2             | 2.9796           | R.VSLVGADDLR.K               | 2            | LAP4_HUMAN           |
| <b><i>Protein LTV1 homolog. - Homo sapiens (Human)</i></b>                                             |               |                  |                              |              |                      |
| Q96GA3                                                                                                 | 3             | 4.7326           | K.LPSSVFASEFEEDVGLLNK.A      | 4            | Q96GA3_HUMA          |
| Q96GA3                                                                                                 | 3             | 4.6523           | R.SQRDPLAADESAPQR.V          | 2            | Q96GA3_HUMA          |
| Q96GA3                                                                                                 | 3             | 4.0677           | R.REEKEETLVIPSTGIK.L         | 2            | Q96GA3_HUMA          |
| Q96GA3                                                                                                 | 2             | 4.5385           | R.DPLAADESAPQR.V             | 4            | Q96GA3_HUMA          |
| Q96GA3                                                                                                 | 2             | 2.7674           | K.TGIPLNVLPK.K               | 1            | Q96GA3_HUMA          |
| <b><i>Protein LYRIC - Homo sapiens (Human)</i></b>                                                     |               |                  |                              |              |                      |
| Q86UE4                                                                                                 | 2             | 3.8526           | K.TISTSDPAEVLVK.N            | 5            | LYRIC_HUMAN          |
| Q86UE4                                                                                                 | 2             | 3.6773           | R.TVEVAEGEAVR.T              | 3            | LYRIC_HUMAN          |
| Q86UE4                                                                                                 | 3             | 4.7878           | R.HDGKEVDEGAWETK.I           | 2            | LYRIC_HUMAN          |

| <i>Accession No*</i>                                                               | <i>Charge</i> | <i>XC(Max)**</i> | <i>Peptide*</i>             | <i>TC***</i> | <i>Reference No*</i> |
|------------------------------------------------------------------------------------|---------------|------------------|-----------------------------|--------------|----------------------|
| Q86UE4                                                                             | 2             | 3.2302           | K.TLPPATSTEPSVILSK.S        | 5            | LYRIC_HUMAN          |
| Q86UE4                                                                             | 2             | 3.067            | K.SETSWESPK.Q               | 6            | LYRIC_HUMAN          |
| Q86UE4                                                                             | 3             | 4.3491           | K.SDSKSSSQVPPILQETDKSK.S    | 1            | LYRIC_HUMAN          |
| Q86UE4                                                                             | 3             | 4.4036           | K.NKGDSLHNVQVSNFK.S         | 2            | LYRIC_HUMAN          |
| Q86UE4                                                                             | 3             | 4.9364           | K.LSSQISAGEEKWNSVSPASAGKR.K | 2            | LYRIC_HUMAN          |
| Q86UE4                                                                             | 3             | 4.0113           | K.LSSQISAGEEKWNSVSPASAGK.R  | 3            | LYRIC_HUMAN          |
| Q86UE4                                                                             | 2             | 3.6284           | K.LSSQISAGEEK.W             | 1            | LYRIC_HUMAN          |
| Q86UE4                                                                             | 2             | 2.8847           | K.WNSVSPASAGK.R             | 1            | LYRIC_HUMAN          |
| <b><i>Protein LZIC - Homo sapiens (Human)</i></b>                                  |               |                  |                             |              |                      |
| Q8WZA0                                                                             | 2             | 4.1835           | R.DLYTQQKVEILTALR.K         | 2            | LZIC_HUMAN           |
| Q8WZA0                                                                             | 2             | 2.9822           | K.ILALASFEVEK.T             | 1            | LZIC_HUMAN           |
| Q8WZA0                                                                             | 3             | 4.5319           | R.LAEMDRDLMVGKLER.D         | 4            | LZIC_HUMAN           |
| Q8WZA0                                                                             | 3             | 4.2924           | R.LAEMDRDLM#VGKLER.D        | 2            | LZIC_HUMAN           |
| Q8WZA0                                                                             | 3             | 4.0552           | R.DLYTQQKVEILTALRK.L        | 1            | LZIC_HUMAN           |
| Q8WZA0                                                                             | 3             | 4.407            | K.VSTDLGSGDKILALASFEVEK.T   | 1            | LZIC_HUMAN           |
| Q8WZA0                                                                             | 1             | 2.8947           | K.VSTDLGSGDK.I              | 2            | LZIC_HUMAN           |
| Q8WZA0                                                                             | 3             | 5.355            | K.LTADDEAFLSANAGAILSQFEK.V  | 13           | LZIC_HUMAN           |
| Q8WZA0                                                                             | 2             | 4.4213           | K.LKQNL EEQLDR.L            | 6            | LZIC_HUMAN           |
| Q8WZA0                                                                             | 2             | 2.8405           | R.DLYTQQK.V                 | 3            | LZIC_HUMAN           |
| <b><i>Protein max - Homo sapiens (Human)</i></b>                                   |               |                  |                             |              |                      |
| P61244                                                                             | 2             | 3.6191           | R.QNALLEQQVR.A              | 5            | MAX_HUMAN            |
| P61244                                                                             | 2             | 4.7194           | R.SSAQLQTNYPSSDNSLYTNAK.G   | 2            | MAX_HUMAN            |
| <b><i>Protein MTO1 homolog, mitochondrial precursor - Homo sapiens (Human)</i></b> |               |                  |                             |              |                      |
| Q9Y2Z2                                                                             | 2             | 3.017            | R.IC*DQSGVHYKVLNRR.K        | 1            | MTO1_HUMAN           |
| <b><i>Protein NDRG1 - Homo sapiens (Human)</i></b>                                 |               |                  |                             |              |                      |
| Q92597                                                                             | 2             | 3.4498           | K.SIIGMTGAGAYILTR.F         | 1            | NDRG1_HUMAN          |
| <b><i>Protein NEDD1 - Homo sapiens (Human)</i></b>                                 |               |                  |                             |              |                      |
| Q8NHV4                                                                             | 2             | 4.3369           | K.LVTSGAESGNLNTSPSSNQTR.N   | 2            | NEDD1_HUMAN          |
| Q8NHV4                                                                             | 2             | 5.0026           | R.SVNVNAASGGVQNSGIVR.E      | 2            | NEDD1_HUMAN          |
| <b><i>Protein NOXP20 - Homo sapiens (Human)</i></b>                                |               |                  |                             |              |                      |
| Q8IWE2                                                                             | 2             | 5.0333           | K.SLLSSASATVGHGLTAVK.E      | 2            | NXP20_HUMAN          |
| <b><i>Protein numb homolog - Homo sapiens (Human)</i></b>                          |               |                  |                             |              |                      |
| P49757                                                                             | 2             | 2.8416           | R.RHAPIQLAR.Q               | 1            | NUMB_HUMAN           |
| P49757                                                                             | 2             | 3.5192           | R.TNPSPTNPFSSDLQK.T         | 5            | NUMB_HUMAN           |
| P49757                                                                             | 3             | 3.8221           | R.TPSEADRWLEEVSK.S          | 1            | NUMB_HUMAN           |

| <i>Accession No*</i>                                                              | <i>Charge</i> | <i>XC(Max)**</i> | <i>Peptide*</i>             | <i>TC***</i> | <i>Reference No*</i> |
|-----------------------------------------------------------------------------------|---------------|------------------|-----------------------------|--------------|----------------------|
| <b><i>Protein OSCP1 - Homo sapiens (Human)</i></b>                                |               |                  |                             |              |                      |
| Q8WVF1                                                                            | 2             | 4.1639           | R.LSTSKGDDLLAMMDEL.-        | 1            | OSCP1_HUMAN          |
| <b><i>Protein phosphatase 1 regulatory subunit 11 - Homo sapiens (Human)</i></b>  |               |                  |                             |              |                      |
| O60927                                                                            | 3             | 5.3918           | K.KVEWTSDTVNEHM#GR.R        | 1            | PP1RB_HUMAN          |
| O60927                                                                            | 3             | 5.808            | K.KVEWTSDTVNEHMGR.R         | 3            | PP1RB_HUMAN          |
| <b><i>Protein phosphatase 1 regulatory subunit 12A - Homo sapiens (Human)</i></b> |               |                  |                             |              |                      |
| O14974                                                                            | 3             | 4.0924           | R.RISEMEEELKMLPDLK.A        | 1            | MYPT1_HUMAN          |
| O14974                                                                            | 2             | 2.9669           | R.KDESPATWR.L               | 1            | MYPT1_HUMAN          |
| O14974                                                                            | 2             | 3.1584           | R.YETSSTSAGDR.Y             | 2            | MYPT1_HUMAN          |
| O14974                                                                            | 2             | 4.7038           | R.KTGSYGALAEITASK.E         | 3            | MYPT1_HUMAN          |
| O14974                                                                            | 2             | 4.3101           | R.LASTSDIEEKENR.D           | 4            | MYPT1_HUMAN          |
| O14974                                                                            | 2             | 3.4761           | R.LAYVAPTIPR.R              | 1            | MYPT1_HUMAN          |
| O14974                                                                            | 2             | 3.3892           | R.LEKDDSTDFKK.L             | 2            | MYPT1_HUMAN          |
| O14974                                                                            | 2             | 3.0158           | R.LSSSLDNKEK.E              | 2            | MYPT1_HUMAN          |
| O14974                                                                            | 2             | 3.8889           | R.LSSSLDNKEKEK.D            | 1            | MYPT1_HUMAN          |
| O14974                                                                            | 3             | 5.5175           | R.RLASTSDIEEKENR.D          | 5            | MYPT1_HUMAN          |
| O14974                                                                            | 3             | 5.1588           | R.RSTQGVTLTDLQEAET.T        | 6            | MYPT1_HUMAN          |
| O14974                                                                            | 3             | 5.6388           | R.RSTQGVTLTDLQEAETIGR.S     | 1            | MYPT1_HUMAN          |
| O14974                                                                            | 2             | 3.7726           | R.SGSYSYLEER.K              | 4            | MYPT1_HUMAN          |
| O14974                                                                            | 2             | 4.6068           | R.STQGVTLTDLQEAET.T         | 4            | MYPT1_HUMAN          |
| O14974                                                                            | 2             | 3.9448           | R.STQGVTLTDLQEAETIGR.S      | 1            | MYPT1_HUMAN          |
| O14974                                                                            | 2             | 2.831            | R.SYLTPVRDEESESQRK.A        | 1            | MYPT1_HUMAN          |
| O14974                                                                            | 3             | 4.7148           | R.ISEMEEELKMLPDLK.A         | 3            | MYPT1_HUMAN          |
| O14974                                                                            | 2             | 3.875            | R.WIGSETDLEPPVVKR.Q         | 2            | MYPT1_HUMAN          |
| O14974                                                                            | 2             | 5.1569           | K.TGSYGALAEITASK.E          | 3            | MYPT1_HUMAN          |
| O14974                                                                            | 2             | 3.1817           | R.YETSSTSAGDRYDSSLGR.S      | 1            | MYPT1_HUMAN          |
| O14974                                                                            | 2             | 3.3468           | R.WIGSETDLEPPVVK.R          | 1            | MYPT1_HUMAN          |
| O14974                                                                            | 2             | 2.755            | K.DTAGVTR.S                 | 1            | MYPT1_HUMAN          |
| O14974                                                                            | 3             | 4.3634           | K.AQLHDTNM#ELTDLKLQLEK.A    | 1            | MYPT1_HUMAN          |
| O14974                                                                            | 2             | 4.2521           | K.AQLHDTNMELTDLK.L          | 4            | MYPT1_HUMAN          |
| O14974                                                                            | 3             | 4.9831           | K.VKFDDGAVFLAACSSGDTDEVLK.L | 2            | MYPT1_HUMAN          |
| O14974                                                                            | 2             | 2.9448           | K.DDSTDFKK.L                | 2            | MYPT1_HUMAN          |
| O14974                                                                            | 2             | 3.1017           | R.ISEMEEELK.M               | 1            | MYPT1_HUMAN          |
| O14974                                                                            | 2             | 2.8286           | K.ESETSREDEYKQK.Y           | 1            | MYPT1_HUMAN          |
| O14974                                                                            | 2             | 2.908            | K.FDDGAVFLAACSSGDTDEVLK.L   | 1            | MYPT1_HUMAN          |

| <i>Accession No*</i>                                                              | <i>Charge</i> | <i>XC(Max)**</i> | <i>Peptide*</i>                   | <i>TC***</i> | <i>Reference No*</i> |
|-----------------------------------------------------------------------------------|---------------|------------------|-----------------------------------|--------------|----------------------|
| O14974                                                                            | 2             | 5.9184           | K.ITTGSSSAGTQSSTSNR.L             | 4            | MYPT1_HUMAN          |
| O14974                                                                            | 2             | 3.0154           | K.KQNLLHSEKR.D                    | 2            | MYPT1_HUMAN          |
| O14974                                                                            | 2             | 3.5917           | K.LYEQILAENEK.L                   | 2            | MYPT1_HUMAN          |
| O14974                                                                            | 2             | 4.6588           | K.LYEQILAENEK.LK.A                | 3            | MYPT1_HUMAN          |
| O14974                                                                            | 2             | 2.7351           | K.MLPDLKADNQR.L                   | 2            | MYPT1_HUMAN          |
| O14974                                                                            | 2             | 4.0002           | K.NKETLIIIEPEK.N                  | 3            | MYPT1_HUMAN          |
| O14974                                                                            | 2             | 4.1005           | K.SGGTALHVAAAK.G                  | 5            | MYPT1_HUMAN          |
| O14974                                                                            | 2             | 3.3778           | K.SLLSSTSTTK.I                    | 2            | MYPT1_HUMAN          |
| O14974                                                                            | 2             | 5.206            | K.SPLIESTANMDNNQSQK.T             | 4            | MYPT1_HUMAN          |
| O14974                                                                            | 3             | 4.2785           | K.VGQTAFDVADEDILGYLEELQKK.Q       | 1            | MYPT1_HUMAN          |
| O14974                                                                            | 2             | 4.2152           | R.ILVNLCMEMVVK.V                  | 10           | MYPT1_HUMAN          |
| O14974                                                                            | 3             | 4.8862           | K.KSPLIESTANMDNNQSQK.T            | 1            | MYPT1_HUMAN          |
| O14974                                                                            | 3             | 5.1975           | K.AQLHDTNMELTDLKLQLEK.A           | 2            | MYPT1_HUMAN          |
| <b><i>Protein phosphatase 1 regulatory subunit 12B - Homo sapiens (Human)</i></b> |               |                  |                                   |              |                      |
| O60237                                                                            | 2             | 3.6542           | K.LYESALTENQK.L                   | 2            | MYPT2_HUMAN          |
| O60237                                                                            | 2             | 3.0845           | R.KMSEMEEEMK.V                    | 1            | MYPT2_HUMAN          |
| O60237                                                                            | 2             | 3.5024           | K.VLTELKSDNQR.L                   | 2            | MYPT2_HUMAN          |
| O60237                                                                            | 2             | 5.1735           | K.TKLQEAQLELADIK.S                | 2            | MYPT2_HUMAN          |
| <b><i>Protein phosphatase 1 regulatory subunit 12C - Homo sapiens (Human)</i></b> |               |                  |                                   |              |                      |
| Q9BZL4                                                                            | 2             | 4.0266           | R.VPGVENS SPAQR.A                 | 3            | Q9BZL4_HUMAN         |
| Q9BZL4                                                                            | 3             | 5.6057           | R.VPGVENS SPAQRAEAPDGQGPQAAR.E    | 2            | Q9BZL4_HUMAN         |
| Q9BZL4                                                                            | 2             | 3.8159           | R.TGASALHVAAAK.G                  | 2            | Q9BZL4_HUMAN         |
| Q9BZL4                                                                            | 2             | 3.6692           | R.TAEGAPGAGLQR.S                  | 2            | Q9BZL4_HUMAN         |
| Q9BZL4                                                                            | 3             | 3.8562           | R.SYQMPVRDEESESQRK.A              | 1            | Q9BZL4_HUMAN         |
| Q9BZL4                                                                            | 2             | 3.0091           | R.SYQMPVRDEESESQR.K               | 1            | Q9BZL4_HUMAN         |
| Q9BZL4                                                                            | 2             | 4.7477           | R.SASSSWLEGTSTQAK.E               | 1            | Q9BZL4_HUMAN         |
| Q9BZL4                                                                            | 3             | 5.0466           | R.RPGGAGGPPIQDEDEGEEGPTPEPPAEPR.T | 2            | Q9BZL4_HUMAN         |
| Q9BZL4                                                                            | 2             | 3.4507           | R.GQEPQAPSSSK.H                   | 2            | Q9BZL4_HUMAN         |
| Q9BZL4                                                                            | 3             | 6.0046           | R.GPAEGEEAEPADRSQESSTLEGGPSAR.R   | 2            | Q9BZL4_HUMAN         |
| Q9BZL4                                                                            | 2             | 3.3608           | R.GPAEGEEAEPADR.S                 | 1            | Q9BZL4_HUMAN         |
| Q9BZL4                                                                            | 3             | 4.087            | R.AVLDSTNADGISALHQACIDENLEVVR.F   | 1            | Q9BZL4_HUMAN         |
| Q9BZL4                                                                            | 2             | 4.7473           | R.AEAPDGQGPQAAR.E                 | 7            | Q9BZL4_HUMAN         |
| Q9BZL4                                                                            | 2             | 2.9882           | K.APESEKPAQSLDPSR.R               | 1            | Q9BZL4_HUMAN         |
| Q9BZL4                                                                            | 2             | 3.9536           | K.SPVQLEEAPFSR.R                  | 2            | Q9BZL4_HUMAN         |
| Q9BZL4                                                                            | 3             | 4.4725           | R.IPEPESPAKPNVPTASTAPPADSR.D      | 2            | Q9BZL4_HUMAN         |

| <i>Accession No*</i>                                                              | <i>Charge</i> | <i>XC(Max)**</i> | <i>Peptide*</i>                   | <i>TC***</i> | <i>Reference No*</i> |
|-----------------------------------------------------------------------------------|---------------|------------------|-----------------------------------|--------------|----------------------|
| <b><i>Protein phosphatase 1 regulatory subunit 14A - Homo sapiens (Human)</i></b> |               |                  |                                   |              |                      |
| Q96A00                                                                            | 2             | 3.0639           | K.WIDGRLEELYR.G                   | 2            | PP14A_HUMAN          |
| Q96A00                                                                            | 2             | 2.7229           | R.GPGGSPGGLQK.R                   | 1            | PP14A_HUMAN          |
| <b><i>Protein phosphatase 1 regulatory subunit 14B - Homo sapiens (Human)</i></b> |               |                  |                                   |              |                      |
| Q96C90                                                                            | 2             | 3.9238           | R.VYFQSPPGAAGEGPGGADDEGPVRR.Q     | 3            | PP14B_HUMAN          |
| <b><i>Protein phosphatase 1 regulatory subunit 14C - Homo sapiens (Human)</i></b> |               |                  |                                   |              |                      |
| Q8TAE6                                                                            | 3             | 5.0058           | R.EDSAPVATAAAAAGQVQQQQQR.R        | 2            | PP14C_HUMAN          |
| Q8TAE6                                                                            | 3             | 7.012            | R.GGAGGSPGSSSGSGSSREDSAPVATAAAAAG | 2            | PP14C_HUMAN          |
| <b><i>Protein phosphatase 1 regulatory subunit 14D - Homo sapiens (Human)</i></b> |               |                  |                                   |              |                      |
| Q9NXH3                                                                            | 3             | 4.968            | R.PTEAFISELLSQLKK.L               | 2            | PP14D_HUMAN          |
| <b><i>Protein phosphatase 1 regulatory subunit 7 - Homo sapiens (Human)</i></b>   |               |                  |                                   |              |                      |
| Q15435                                                                            | 2             | 4.231            | R.GAGQQSQEMMEVDR.R                | 2            | PP1R7_HUMAN          |
| <b><i>Protein phosphatase 1A - Homo sapiens (Human)</i></b>                       |               |                  |                                   |              |                      |
| P35813                                                                            | 2             | 3.4127           | R.NVIEAVYNR.L                     | 2            | PPM1A_HUMAN          |
| <b><i>Protein phosphatase 1G - Homo sapiens (Human)</i></b>                       |               |                  |                                   |              |                      |
| O15355                                                                            | 2             | 3.7977           | R.LPLPYGFSAMQGWV.V                | 4            | PPM1G_HUMAN          |
| O15355                                                                            | 2             | 2.9009           | R.ETPSQENGPTAK.A                  | 1            | PPM1G_HUMAN          |
| O15355                                                                            | 2             | 3.4047           | K.AYTGFSNSER.G                    | 4            | PPM1G_HUMAN          |
| O15355                                                                            | 2             | 2.9675           | K.ALEDAFLAIDAK.L                  | 2            | PPM1G_HUMAN          |
| <b><i>Protein phosphatase methylesterase 1 - Homo sapiens (Human)</i></b>         |               |                  |                                   |              |                      |
| Q9Y570                                                                            | 3             | 3.762            | R.LPSRPPLPGSGGSQSGAK.M            | 1            | PPME1_HUMAN          |
| <b><i>Protein phosphatase Slingshot homolog 2 - Homo sapiens (Human)</i></b>      |               |                  |                                   |              |                      |
| Q76176                                                                            | 3             | 4.0947           | R.SSSLNTPHASEESSMDEEQSK.A         | 1            | SSH2_HUMAN           |
| <b><i>Protein phosphatase Slingshot homolog 3 - Homo sapiens (Human)</i></b>      |               |                  |                                   |              |                      |
| Q8TE77                                                                            | 2             | 2.7422           | R.QASVHDSGEEGEA.-                 | 1            | SSH3_HUMAN           |
| <b><i>Protein Red - Homo sapiens (Human)</i></b>                                  |               |                  |                                   |              |                      |
| Q13123                                                                            | 1             | 3.1079           | K.AAFQYGIK.M                      | 4            | RED_HUMAN            |
| Q13123                                                                            | 2             | 2.8508           | K.KMEADGVEVK.R                    | 2            | RED_HUMAN            |
| Q13123                                                                            | 2             | 4.2053           | R.AVGPTAEADKSAAEK.R               | 2            | RED_HUMAN            |
| Q13123                                                                            | 3             | 3.8125           | R.DGVNKDYEEETELISTTANYR.A         | 1            | RED_HUMAN            |
| <b><i>Protein RMI1 homolog - Homo sapiens (Human)</i></b>                         |               |                  |                                   |              |                      |
| Q9H9A7                                                                            | 2             | 2.8662           | K.AMVLALQDVNM#EHLENLKKR.L         | 1            | RMI1_HUMAN           |
| <b><i>Protein S100-A10 - Homo sapiens (Human)</i></b>                             |               |                  |                                   |              |                      |
| P60903                                                                            | 2             | 3.0954           | K.FAGDKGYLTK.E                    | 1            | S10AA_HUMAN          |
| P60903                                                                            | 3             | 4.876            | R.VLMEKEFFPGFLENQKDPLAVDK.I       | 1            | S10AA_HUMAN          |



| <i>Accession No*</i>                                  | <i>Charge</i> | <i>XC(Max)**</i> | <i>Peptide*</i>                    | <i>TC***</i> | <i>Reference No*</i> |
|-------------------------------------------------------|---------------|------------------|------------------------------------|--------------|----------------------|
| <b><i>Protein S100-A11 - Homo sapiens (Human)</i></b> |               |                  |                                    |              |                      |
| P31949                                                | 1             | 3.5561           | K.DGYNYTLISK.T                     | 7            | S10AB_HUMAN          |
| P31949                                                | 3             | 3.9372           | K.ISSPTETERCIESLIAVFQK.Y           | 1            | S10AB_HUMAN          |
| P31949                                                | 2             | 3.866            | K.YAGKDGYNITLSK.T                  | 2            | S10AB_HUMAN          |
| <b><i>Protein S100-A12 - Homo sapiens (Human)</i></b> |               |                  |                                    |              |                      |
| P80511                                                | 2             | 3.6935           | K.GHFDTLKSGELK.Q                   | 1            | S10AC_HUMAN          |
| <b><i>Protein S100-A13 - Homo sapiens (Human)</i></b> |               |                  |                                    |              |                      |
| Q99584                                                | 2             | 3.3281           | K.DVGSLSDEKMK.S                    | 3            | S10AD_HUMAN          |
| Q99584                                                | 3             | 4.7003           | K.SLDVNQDSELKFNEYWR.L              | 2            | S10AD_HUMAN          |
| Q99584                                                | 1             | 2.2945           | R.LIGELAK.E                        | 2            | S10AD_HUMAN          |
| Q99584                                                | 3             | 4.4271           | R.KDSLVSNEFKELVTQQLPHLLK.D         | 2            | S10AD_HUMAN          |
| Q99584                                                | 2             | 3.1232           | R.KDSLVSNEFK.E                     | 2            | S10AD_HUMAN          |
| Q99584                                                | 1             | 3.0688           | K.DSLVSNEFK.E                      | 2            | S10AD_HUMAN          |
| Q99584                                                | 2             | 3.0479           | K.SLDVNQDSELK.F                    | 2            | S10AD_HUMAN          |
| Q99584                                                | 2             | 3.5111           | K.DVGSLSDEKM#K.S                   | 6            | S10AD_HUMAN          |
| Q99584                                                | 1             | 2.9049           | K.DVGSLSDEK.M                      | 4            | S10AD_HUMAN          |
| Q99584                                                | 4             | 5.446            | K.DSLVSNEFKELVTQQLPHLLKDVGSLSDEK.M | 3            | S10AD_HUMAN          |
| Q99584                                                | 2             | 4.2359           | K.ELVTQQLPHLLK.D                   | 1            | S10AD_HUMAN          |
| <b><i>Protein S100-A4 - Homo sapiens (Human)</i></b>  |               |                  |                                    |              |                      |
| P26447                                                | 2             | 3.3078           | K.RTDEAAFQK.L                      | 2            | S10A4_HUMAN          |
| <b><i>Protein S100-A6 - Homo sapiens (Human)</i></b>  |               |                  |                                    |              |                      |
| P06703                                                | 2             | 3.0948           | K.LQDAEIAR.L                       | 4            | S10A6_HUMAN          |
| <b><i>Protein S100-A8 - Homo sapiens (Human)</i></b>  |               |                  |                                    |              |                      |
| P05109                                                | 2             | 3.492            | K.LLETECPQYIR.K                    | 2            | S10A8_HUMAN          |
| <b><i>Protein S100-A9 - Homo sapiens (Human)</i></b>  |               |                  |                                    |              |                      |
| P06702                                                | 2             | 4.779            | R.NIETIINTFHQYSVK.L                | 6            | S10A9_HUMAN          |
| P06702                                                | 1             | 2.2378           | R.LTWASHEK.M                       | 1            | S10A9_HUMAN          |
| P06702                                                | 2             | 3.0675           | R.KDLQNFLK.K                       | 3            | S10A9_HUMAN          |
| P06702                                                | 2             | 5.1988           | K.VIEHIMEDLDTNADK.Q                | 3            | S10A9_HUMAN          |
| P06702                                                | 2             | 3.6178           | K.MHEGDEGPGHHHKPGLGEGTP.-          | 1            | S10A9_HUMAN          |
| P06702                                                | 2             | 4.5312           | K.LGHPDTLNQGEFKELVRK.D             | 2            | S10A9_HUMAN          |
| P06702                                                | 2             | 4.5322           | K.LGHPDTLNQGEFKELVR.K              | 1            | S10A9_HUMAN          |
| P06702                                                | 2             | 2.8088           | K.DLQNFLK.K                        | 3            | S10A9_HUMAN          |
| P06702                                                | 2             | 4.2145           | K.LGHPDTLNQGEFK.E                  | 13           | S10A9_HUMAN          |
| <b><i>Protein SET - Homo sapiens (Human)</i></b>      |               |                  |                                    |              |                      |

| <i>Accession No*</i>                                                                                 | <i>Charge</i> | <i>XC(Max)**</i> | <i>Peptide*</i>                    | <i>TC***</i> | <i>Reference No*</i> |
|------------------------------------------------------------------------------------------------------|---------------|------------------|------------------------------------|--------------|----------------------|
| Q01105                                                                                               | 3             | 5.7374           | K.KPRPPPALGPEETSASAGLPK.K          | 5            | SET_HUMAN            |
| Q01105                                                                                               | 2             | 2.8056           | K.RQSPLPPQK.K                      | 3            | SET_HUMAN            |
| <b><i>Protein Shroom4 - Homo sapiens (Human)</i></b>                                                 |               |                  |                                    |              |                      |
| Q9ULL8                                                                                               | 2             | 4.994            | R.ASSVDSNPLNEASAELAK.A             | 2            | SHRM4_HUMAN          |
| Q9ULL8                                                                                               | 3             | 3.9637           | K.APSGRPNVAETSGGSR.R               | 1            | SHRM4_HUMAN          |
| <b><i>Protein SLC7A6OS - Homo sapiens (Human)</i></b>                                                |               |                  |                                    |              |                      |
| Q96CW6                                                                                               | 2             | 3.624            | R.SDAVESAAQK.T                     | 3            | S7A6O_HUMAN          |
| <b><i>Protein TMED8 - Homo sapiens (Human)</i></b>                                                   |               |                  |                                    |              |                      |
| Q6PL24                                                                                               | 3             | 4.3218           | K.QDLLPADQAQVLNEM#AK.Y             | 1            | TMED8_HUMAN          |
| Q6PL24                                                                                               | 2             | 4.0834           | K.QDLLPADQAQVLNEMAK.Y              | 3            | TMED8_HUMAN          |
| <b><i>Protein transport protein Sec31A - Homo sapiens (Human)</i></b>                                |               |                  |                                    |              |                      |
| O94979                                                                                               | 3             | 3.7257           | K.KPIPDEHLILK.T                    | 1            | SC31A_HUMAN          |
| O94979                                                                                               | 3             | 3.8192           | K.RLEFLYDKLR.E                     | 2            | SC31A_HUMAN          |
| <b><i>Protein TSSC4 - Homo sapiens (Human)</i></b>                                                   |               |                  |                                    |              |                      |
| Q9Y5U2                                                                                               | 2             | 2.9149           | R.GM#SSTFSQR.S                     | 1            | TSSC4_HUMAN          |
| Q9Y5U2                                                                                               | 2             | 3.3072           | R.SRDIFDCLEGAAR.R                  | 1            | TSSC4_HUMAN          |
| Q9Y5U2                                                                                               | 2             | 3.1516           | R.GMSSTFSQR.S                      | 3            | TSSC4_HUMAN          |
| Q9Y5U2                                                                                               | 2             | 2.9378           | K.RPLAPSGR.S                       | 1            | TSSC4_HUMAN          |
| Q9Y5U2                                                                                               | 2             | 3.4185           | R.NKSSSPEDPGAEV.-                  | 2            | TSSC4_HUMAN          |
| <b><i>Protein tyrosine phosphatase receptor type C-associated protein - Homo sapiens (Human)</i></b> |               |                  |                                    |              |                      |
| Q14761                                                                                               | 2             | 3.4845           | R.AAGGQGLHVTAL.-                   | 2            | PTCA_HUMAN           |
| <b><i>Protein UNQ6126/PRO20091 precursor - Homo sapiens (Human)</i></b>                              |               |                  |                                    |              |                      |
| Q6UXV3                                                                                               | 3             | 3.754            | K.INC*FFYLEKQLC*QLPSPLCLSSLLTLK.L  | 1            | U6126_HUMAN          |
| <b><i>Protein wibg homolog - Homo sapiens (Human)</i></b>                                            |               |                  |                                    |              |                      |
| Q9BRP8                                                                                               | 3             | 4.1151           | R.RQQQEKGEAEALS.R.T                | 2            | WIBG_HUMAN           |
| Q9BRP8                                                                                               | 3             | 4.9031           | R.TLDKVSLEETAQLPSAPQGS.R.A         | 4            | WIBG_HUMAN           |
| Q9BRP8                                                                                               | 2             | 3.9753           | R.IQAGEVSQPSK.E                    | 5            | WIBG_HUMAN           |
| Q9BRP8                                                                                               | 2             | 3.9188           | R.QQQEKGEAEALS.R.T                 | 2            | WIBG_HUMAN           |
| Q9BRP8                                                                                               | 2             | 5.9795           | R.IQAGEVSQPSKEQLEK.L               | 4            | WIBG_HUMAN           |
| Q9BRP8                                                                                               | 2             | 2.7168           | K.YIASTQRPDGTWR.K                  | 1            | WIBG_HUMAN           |
| Q9BRP8                                                                                               | 2             | 4.4481           | K.VSLEETAQLPSAPQGS.R.A             | 2            | WIBG_HUMAN           |
| Q9BRP8                                                                                               | 3             | 3.7385           | K.SKPELPPGLSPEATAPVTPSRPEGGEPGLSK. | 1            | WIBG_HUMAN           |
| Q9BRP8                                                                                               | 3             | 4.1247           | K.LRQVEELQQR.I                     | 4            | WIBG_HUMAN           |
| Q9BRP8                                                                                               | 2             | 3.76             | K.EGYVPQEEVPVYENK.Y                | 2            | WIBG_HUMAN           |
| Q9BRP8                                                                                               | 2             | 4.7976           | R.VKEGYVPQEEVPVYENK.Y              | 3            | WIBG_HUMAN           |

| <i>Accession No*</i>                                                                         | <i>Charge</i> | <i>XC(Max)**</i> | <i>Peptide*</i>                    | <i>TC***</i> | <i>Reference No*</i> |
|----------------------------------------------------------------------------------------------|---------------|------------------|------------------------------------|--------------|----------------------|
| Q9BRP8                                                                                       | 2             | 4.3237           | R.AAPTAASDQPDSAATTEK.A             | 7            | WIBG_HUMAN           |
| <b><i>Protein Z-dependent protease inhibitor precursor - Homo sapiens (Human)</i></b>        |               |                  |                                    |              |                      |
| Q9UK55                                                                                       | 3             | 3.911            | R.GLHLQALKPTKPGLLPSLFK.G           | 2            | ZPI_HUMAN            |
| Q9UK55                                                                                       | 2             | 5.3551           | R.IFSPFADLSELSATGR.N               | 3            | ZPI_HUMAN            |
| <b><i>Protein-L-isoaspartate(D-aspartate) O-methyltransferase - Homo sapiens (Human)</i></b> |               |                  |                                    |              |                      |
| P22061                                                                                       | 4             | 4.7806           | R.M#GYAEEAPYDAIHVGAAAPVVPQALIDQLKP | 1            | PIMT_HUMAN           |
| P22061                                                                                       | 4             | 4.9551           | R.MGYAEEAPYDAIHVGAAAPVVPQALIDQLKP  | 1            | PIMT_HUMAN           |
| P22061                                                                                       | 2             | 2.815            | K.DDPTLLSSGR.V                     | 1            | PIMT_HUMAN           |
| <b><i>Prothrombin precursor - Homo sapiens (Human)</i></b>                                   |               |                  |                                    |              |                      |
| P00734                                                                                       | 3             | 4.909            | K.SLEDKTERELLESYIDGR.I             | 2            | THRB_HUMAN           |
| P00734                                                                                       | 1             | 2.1312           | K.YTACETAR.T                       | 1            | THRB_HUMAN           |
| P00734                                                                                       | 2             | 2.8513           | R.ELLESYIDGR.I                     | 1            | THRB_HUMAN           |
| P00734                                                                                       | 3             | 3.7261           | R.LAVTTHGLPCLAWASQAQAK.A           | 1            | THRB_HUMAN           |
| P00734                                                                                       | 2             | 3.4814           | R.TATSEYQTFNPR.T                   | 4            | THRB_HUMAN           |
| P00734                                                                                       | 3             | 4.4589           | K.HQDFNSAVQLVENFCR.N               | 2            | THRB_HUMAN           |
| <b><i>Prothymosin a14 - Homo sapiens (Human)</i></b>                                         |               |                  |                                    |              |                      |
| Q9UMZ1                                                                                       | 2             | 3.7318           | R.AAEDDEDNDVDTK.K                  | 9            | Q9UMZ1_HUMA          |
| Q9UMZ1                                                                                       | 2             | 3.9524           | R.AAEDDEDNDVDTKK.Q                 | 2            | Q9UMZ1_HUMA          |
| <b><i>Protocadherin Fat 2 precursor - Homo sapiens (Human)</i></b>                           |               |                  |                                    |              |                      |
| Q9NYQ8                                                                                       | 2             | 3.0927           | K.VM#ARDGGGRVAFV*TVK.I             | 1            | FAT2_HUMAN           |
| <b><i>Protocadherin-17 precursor - Homo sapiens (Human)</i></b>                              |               |                  |                                    |              |                      |
| O14917                                                                                       | 2             | 3.6301           | R.DPPFM#ASDQM#AR.V                 | 2            | PCD17_HUMAN          |
| <b><i>Proto-oncogene C-crk - Homo sapiens (Human)</i></b>                                    |               |                  |                                    |              |                      |
| P46108                                                                                       | 3             | 4.6803           | R.VPNAYDKTALALEVGELVK.V            | 1            | CRK_HUMAN            |
| P46108                                                                                       | 2             | 3.2842           | K.TALALEVGELVK.V                   | 2            | CRK_HUMAN            |
| P46108                                                                                       | 3             | 5.687            | K.RVPNAYDKTALALEVGELVK.V           | 1            | CRK_HUMAN            |
| <b><i>Proto-oncogene protein c-fos - Homo sapiens (Human)</i></b>                            |               |                  |                                    |              |                      |
| P01100                                                                                       | 2             | 3.0547           | R.KGSSSNEPSSDSLSSPTLLAL.-          | 1            | FOS_HUMAN            |
| <b><i>Proto-oncogene tyrosine-protein kinase ABL1 - Homo sapiens (Human)</i></b>             |               |                  |                                    |              |                      |
| P00519                                                                                       | 3             | 5.2789           | K.AGGKPSQSPSQEAAGEAVLGAK.T         | 2            | ABL1_HUMAN           |
| P00519                                                                                       | 3             | 5.1031           | K.TKATSLVDVANSDAAKPSQPGEGLK.K      | 1            | ABL1_HUMAN           |
| P00519                                                                                       | 2             | 3.617            | R.LATGEEEEGGSSSK.R                 | 2            | ABL1_HUMAN           |
| <b><i>Pseudouridylate synthase 7 homolog - Homo sapiens (Human)</i></b>                      |               |                  |                                    |              |                      |
| Q96PZ0                                                                                       | 2             | 4.0111           | K.HGLTEADVGITK.F                   | 1            | PUS7_HUMAN           |
| <b><i>Pterin-4-alpha-carbinolamine dehydratase - Homo sapiens (Human)</i></b>                |               |                  |                                    |              |                      |

| <i>Accession No*</i>                                                                                    | <i>Charge</i> | <i>XC(Max)**</i> | <i>Peptide*</i>             | <i>TC***</i> | <i>Reference No*</i> |
|---------------------------------------------------------------------------------------------------------|---------------|------------------|-----------------------------|--------------|----------------------|
| P61457                                                                                                  | 2             | 4.3413           | R.LSAEERDQLLPNLR.A          | 5            | PHS_HUMAN            |
| P61457                                                                                                  | 3             | 4.6366           | R.VALQAEKLDHHPWFNVYNK.V     | 2            | PHS_HUMAN            |
| P61457                                                                                                  | 2             | 3.7272           | R.AVGWNELEGR.D              | 4            | PHS_HUMAN            |
| P61457                                                                                                  | 3             | 3.7412           | K.LDHHPEWFFNVYNK.V          | 1            | PHS_HUMAN            |
| <b><i>PTPN18 protein - Homo sapiens (Human)</i></b>                                                     |               |                  |                             |              |                      |
| Q7Z637                                                                                                  | 2             | 5.2366           | R.GAPAGAGSGTQTGTGTGAR.S     | 5            | Q7Z637_HUMAN         |
| <b><i>Pumilio homolog 2 - Homo sapiens (Human)</i></b>                                                  |               |                  |                             |              |                      |
| Q8TB72                                                                                                  | 2             | 3.7748           | R.DAETDGPKEGDQK.G           | 3            | PUM2_HUMAN           |
| <b><i>Putative adenosylhomocysteinase 2 - Homo sapiens (Human)</i></b>                                  |               |                  |                             |              |                      |
| O43865                                                                                                  | 3             | 4.43             | K.EIEDAEKYSFMATVTK.A        | 2            | SAHH2_HUMAN          |
| O43865                                                                                                  | 2             | 3.3543           | K.KQIQFADDMQEFTK.F          | 1            | SAHH2_HUMAN          |
| O43865                                                                                                  | 3             | 5.2435           | K.KQIQFADDMQEFTKFPTK.T      | 2            | SAHH2_HUMAN          |
| <b><i>Putative adenosylhomocysteinase 3 - Homo sapiens (Human)</i></b>                                  |               |                  |                             |              |                      |
| Q96HN2                                                                                                  | 3             | 4.6001           | R.HRDGGEALVSPDGTVTEAPR.T    | 2            | SAHH3_HUMAN          |
| <b><i>Putative ATP-dependent RNA helicase DHX29 - Homo sapiens (Human)</i></b>                          |               |                  |                             |              |                      |
| Q7Z478                                                                                                  | 2             | 3.8476           | K.SAEAGIAGEAQS.K            | 2            | DHX29_HUMAN          |
| Q7Z478                                                                                                  | 2             | 3.2597           | R.PATAAAAAAGSR.E            | 2            | DHX29_HUMAN          |
| <b><i>Putative ATP-dependent RNA helicase DHX57 - Homo sapiens (Human)</i></b>                          |               |                  |                             |              |                      |
| Q6P158                                                                                                  | 2             | 4.6018           | R.DLQEQDADAGSER.G           | 5            | DHX57_HUMAN          |
| <b><i>Putative GTP-binding protein 9 - Homo sapiens (Human)</i></b>                                     |               |                  |                             |              |                      |
| Q9NTK5                                                                                                  | 2             | 3.1571           | R.NYIVEDGDIFFK.F            | 1            | GTPB9_HUMAN          |
| <b><i>Putative GTP-binding protein Parf - Homo sapiens (Human)</i></b>                                  |               |                  |                             |              |                      |
| Q3YEC7                                                                                                  | 3             | 4.2268           | R.TAADELEAFLGGGAPGGR.H      | 2            | PARF_HUMAN           |
| <b><i>Putative MAPK activating protein - Homo sapiens (Human)</i></b>                                   |               |                  |                             |              |                      |
| Q7Z422                                                                                                  | 1             | 2.1806           | R.EAEYAEAR.K                | 1            | Q7Z422_HUMAN         |
| Q7Z422                                                                                                  | 2             | 4.151            | R.ILGSASPEEEQEKPILDRPTR.I   | 1            | Q7Z422_HUMAN         |
| Q7Z422                                                                                                  | 2             | 3.8593           | R.ISQPEDSRQPNNVIR.Q         | 2            | Q7Z422_HUMAN         |
| Q7Z422                                                                                                  | 3             | 4.8705           | K.SPPKVPIVIQDDSLPAGPPPQIR.I | 3            | Q7Z422_HUMAN         |
| <b><i>Putative pre-mRNA-splicing factor ATP-dependent RNA helicase DHX15 - Homo sapiens (Human)</i></b> |               |                  |                             |              |                      |
| O43143                                                                                                  | 2             | 5.1539           | R.HRLDLGEDYPSGK.K           | 3            | DHX15_HUMAN          |
| <b><i>Putative RNA methyltransferase NOL1 - Homo sapiens (Human)</i></b>                                |               |                  |                             |              |                      |
| P46087                                                                                                  | 2             | 4.7953           | K.TQASSSFQDSSQPAGK.A        | 4            | NOL1_HUMAN           |
| <b><i>Putative RNA-binding protein 15 - Homo sapiens (Human)</i></b>                                    |               |                  |                             |              |                      |
| Q96T37                                                                                                  | 2             | 3.2997           | R.RLPEESGGR.H               | 2            | RBM15_HUMAN          |
| Q96T37                                                                                                  | 2             | 3.2969           | R.SDGSAPSTSTASSK.L          | 2            | RBM15_HUMAN          |

| <i>Accession No*</i>                                                            | <i>Charge</i> | <i>XC(Max)**</i> | <i>Peptide*</i>                    | <i>TC***</i> | <i>Reference No*</i> |
|---------------------------------------------------------------------------------|---------------|------------------|------------------------------------|--------------|----------------------|
| Q96T37                                                                          | 2             | 3.5953           | R.EYDTGGGSSSSR.L                   | 2            | RBM15_HUMAN          |
| Q96T37                                                                          | 2             | 3.3084           | K.ISHLSGSGSGDER.V                  | 2            | RBM15_HUMAN          |
| Q96T37                                                                          | 4             | 5.0129           | K.ISELGSQLSDEAVEDGLFHEFKR.F        | 1            | RBM15_HUMAN          |
| <b><i>Putative RNA-binding protein 3 - Homo sapiens (Human)</i></b>             |               |                  |                                    |              |                      |
| P98179                                                                          | 2             | 3.3399           | R.AM#NGESLDGR.Q                    | 4            | RBM3_HUMAN           |
| P98179                                                                          | 1             | 3.1913           | R.AMNGESLDGR.Q                     | 8            | RBM3_HUMAN           |
| P98179                                                                          | 2             | 5.6466           | R.GFGFITFTNPEHASVAM#R.A            | 2            | RBM3_HUMAN           |
| P98179                                                                          | 2             | 5.6206           | R.GFGFITFTNPEHASVAMR.A             | 13           | RBM3_HUMAN           |
| P98179                                                                          | 2             | 3.8314           | R.PGGYGYGYGR.S                     | 2            | RBM3_HUMAN           |
| P98179                                                                          | 3             | 5.9917           | R.SRFGFITFTNPEHASVAMR.A            | 4            | RBM3_HUMAN           |
| P98179                                                                          | 2             | 4.3163           | R.YSGGNYRDNYDN.-                   | 3            | RBM3_HUMAN           |
| P98179                                                                          | 2             | 3.3525           | R.YYDSRPGGYGYGYGR.S                | 2            | RBM3_HUMAN           |
| P98179                                                                          | 4             | 4.7543           | K.LFVGGLNFNTDEQALEDHFSSFGPISEVVVVK | 3            | RBM3_HUMAN           |
| <b><i>Putative RNA-binding protein Luc7-like 2 - Homo sapiens (Human)</i></b>   |               |                  |                                    |              |                      |
| Q9Y383                                                                          | 2             | 4.0108           | R.AMLDQLMGTSR.D                    | 3            | LC7L2_HUMAN          |
| <b><i>Putative rRNA methyltransferase 3 - Homo sapiens (Human)</i></b>          |               |                  |                                    |              |                      |
| Q8IY81                                                                          | 3             | 4.1656           | R.LTEVQDDKEEEEEENPLLVPLEEK.A       | 1            | RRMJ3_HUMAN          |
| Q8IY81                                                                          | 2             | 3.0158           | K.SDDDGFEIVPIEDPAK.H               | 1            | RRMJ3_HUMAN          |
| Q8IY81                                                                          | 2             | 3.1725           | R.ILDPEGLALGAVIASSK.K              | 1            | RRMJ3_HUMAN          |
| <b><i>Putative thiosulfate sulfurtransferase KAT - Homo sapiens (Human)</i></b> |               |                  |                                    |              |                      |
| Q8NFU3                                                                          | 2             | 3.2216           | K.RGLQATQLAR.S                     | 3            | KAT_HUMAN            |
| Q8NFU3                                                                          | 1             | 3.5255           | R.GLQATQLAR.S                      | 6            | KAT_HUMAN            |
| Q8NFU3                                                                          | 1             | 2.5393           | R.NYAGAYR.E                        | 3            | KAT_HUMAN            |
| Q8NFU3                                                                          | 2             | 4.2408           | R.NYAGAYREWLEK.E                   | 2            | KAT_HUMAN            |
| Q8NFU3                                                                          | 2             | 4.1359           | R.NYAGAYREWLEKES.-                 | 4            | KAT_HUMAN            |
| Q8NFU3                                                                          | 1             | 2.4358           | R.SLGYTGAR.N                       | 2            | KAT_HUMAN            |
| Q8NFU3                                                                          | 1             | 2.5043           | R.SLLASGR.A                        | 4            | KAT_HUMAN            |
| <b><i>Putative uncharacterized protein - Homo sapiens (Human)</i></b>           |               |                  |                                    |              |                      |
| Q9Y520                                                                          | 2             | 4.1236           | R.SVSHGSNHTQKPDEQR.S               | 4            | Q9Y520_HUMAN         |
| Q05CP8                                                                          | 3             | 6.0938           | R.KLMQLQHEKAELEQHLEQEQQEFQVNK.L    | 1            | Q05CP8_HUMA          |
| Q9Y520                                                                          | 2             | 3.0367           | R.MLWGSDPYPHAEPQQATTPK.A           | 1            | Q9Y520_HUMAN         |
| A0JLQ0                                                                          | 2             | 4.6923           | R.YSLTYIYTGLSK.H                   | 7            | A0JLQ0_HUMAN         |
| Q9Y520                                                                          | 2             | 3.0234           | R.PAVLSGYFK.Q                      | 2            | Q9Y520_HUMAN         |
| Q9Y520                                                                          | 2             | 3.2207           | R.DHAISLSEPR.M                     | 2            | Q9Y520_HUMAN         |
| Q05DR4                                                                          | 3             | 4.7844           | R.RSLAALSQIAYQR.N                  | 7            | Q05DR4_HUMA          |

| <i>Accession No*</i>                                                                | <i>Charge</i> | <i>XC(Max)**</i> | <i>Peptide*</i>                 | <i>TC***</i> | <i>Reference No*</i> |
|-------------------------------------------------------------------------------------|---------------|------------------|---------------------------------|--------------|----------------------|
| Q96F87                                                                              | 2             | 4.7183           | R.SFQPLGPGYGISQSSR.L            | 5            | Q96F87_HUMAN         |
| Q05DR4                                                                              | 2             | 4.1898           | R.SLAALSQIAYQR.N                | 7            | Q05DR4_HUMA          |
| Q05DR4                                                                              | 3             | 3.7851           | R.SLAALSQIAYQRNDDDEEEAARER.R    | 1            | Q05DR4_HUMA          |
| Q05DE8                                                                              | 1             | 2.9767           | R.TYAGGTASATK.V                 | 3            | Q05DE8_HUMA          |
| Q05CP8                                                                              | 4             | 5.0215           | R.KLM#QLQHEKAELEQHQEFQVVK.L     | 2            | Q05CP8_HUMA          |
| Q05DR4                                                                              | 2             | 4.0159           | R.SLAALSQIAYQRNDDDEEEAAR.E      | 2            | Q05DR4_HUMA          |
| Q9Y520                                                                              | 3             | 3.7313           | K.EATPVVHETEPESGSQPRPAVLSGYFK.Q | 1            | Q9Y520_HUMAN         |
| Q9Y520                                                                              | 2             | 4.0302           | R.ISAVESQPSR.K                  | 3            | Q9Y520_HUMAN         |
| Q05DE8                                                                              | 2             | 3.801            | K.AASLGSSQSSR.T                 | 11           | Q05DE8_HUMA          |
| Q05DE8                                                                              | 2             | 3.4302           | K.KAASLGSSQSSR.T                | 4            | Q05DE8_HUMA          |
| Q05DE8                                                                              | 2             | 2.8511           | K.SSSM#NPTETK.A                 | 3            | Q05DE8_HUMA          |
| Q05DE8                                                                              | 2             | 3.2385           | K.SSSMNPETK.A                   | 3            | Q05DE8_HUMA          |
| Q05DE8                                                                              | 2             | 3.2215           | K.TSESPSKPGEK.K                 | 13           | Q05DE8_HUMA          |
| A2RQF4                                                                              | 2             | 3.5343           | R.AQQLLDAVEQR.Q                 | 1            | A2RQF4_HUMA          |
| Q9HBR0                                                                              | 3             | 6.2378           | R.DLGLAADLPGGAEGAAAQPQAVLR.Q    | 1            | Q9HBR0_HUMA          |
| Q7Z2U7                                                                              | 2             | 3.3017           | R.FSGSNSGNTATLSISR.V            | 1            | Q7Z2U7_HUMA          |
| A5PL36                                                                              | 2             | 4.6705           | R.GEVGAGAGPGAQAGPSAK.R          | 2            | A5PL36_HUMAN         |
| Q9Y520                                                                              | 2             | 2.7552           | R.ESSEAVQVQK.F                  | 1            | Q9Y520_HUMAN         |
| <b><i>Putative uncharacterized protein CAPG - Homo sapiens (Human)</i></b>          |               |                  |                                 |              |                      |
| Q53SA7                                                                              | 3             | 3.8424           | R.M#QYAPNTQVEILPQGHESPIFK.Q     | 1            | Q53SA7_HUMA          |
| <b><i>Putative uncharacterized protein DKFZp434M1616 - Homo sapiens (Human)</i></b> |               |                  |                                 |              |                      |
| Q9NSM8                                                                              | 2             | 3.0401           | K.M#NSIVYQK.Q                   | 1            | Q9NSM8_HUMA          |
| Q9NSM8                                                                              | 2             | 3.6787           | K.QRAEVLQSTQR.F                 | 1            | Q9NSM8_HUMA          |
| Q9NSM8                                                                              | 2             | 2.7671           | R.AEVLQSTQR.F                   | 1            | Q9NSM8_HUMA          |
| Q9NSM8                                                                              | 2             | 2.9862           | R.FFSEQQSK.Q                    | 1            | Q9NSM8_HUMA          |
| <b><i>Putative uncharacterized protein DKFZp451J0218 - Homo sapiens (Human)</i></b> |               |                  |                                 |              |                      |
| Q86T83                                                                              | 2             | 3.2912           | K.LEEELDLLVDLDHQR.Q             | 1            | Q86T83_HUMAN         |
| <b><i>Putative uncharacterized protein DKFZp564G0422 - Homo sapiens (Human)</i></b> |               |                  |                                 |              |                      |
| Q5JXL8                                                                              | 2             | 2.7828           | K.REQAEER.Y                     | 1            | Q5JXL8_HUMAN         |
| Q5JXL8                                                                              | 1             | 2.2757           | R.EQLAALKK.H                    | 4            | Q5JXL8_HUMAN         |
| Q5JXL8                                                                              | 1             | 2.5194           | R.EQLAALK.K                     | 4            | Q5JXL8_HUMAN         |
| Q5JXL8                                                                              | 2             | 2.9993           | K.REQAEERYFR.R                  | 1            | Q5JXL8_HUMAN         |
| Q5JXL8                                                                              | 1             | 2.2086           | R.EAGGAFGK.R                    | 2            | Q5JXL8_HUMAN         |
| Q5JXL8                                                                              | 1             | 2.1556           | R.EAGGAFGKR.E                   | 1            | Q5JXL8_HUMAN         |
| <b><i>Putative uncharacterized protein DKFZp667I133 - Homo sapiens (Human)</i></b>  |               |                  |                                 |              |                      |

| <i>Accession No*</i>                                                                 | <i>Charge</i> | <i>XC(Max)**</i> | <i>Peptide*</i>                | <i>TC***</i> | <i>Reference No*</i> |
|--------------------------------------------------------------------------------------|---------------|------------------|--------------------------------|--------------|----------------------|
| Q8ND71                                                                               | 2             | 2.9244           | K.NVQEM#SQAEEK.L               | 1            | Q8ND71_HUMA          |
| <b><i>Putative uncharacterized protein DKFZp686I04144 - Homo sapiens (Human)</i></b> |               |                  |                                |              |                      |
| Q5HYK7                                                                               | 2             | 2.9501           | R.ASGEWDSGTENR.L               | 1            | Q5HYK7_HUMA          |
| Q5HYK7                                                                               | 3             | 4.1388           | R.IKVFEQGQTNIEISGLPK.K         | 2            | Q5HYK7_HUMA          |
| <b><i>Putative uncharacterized protein DKFZp686L07201 - Homo sapiens (Human)</i></b> |               |                  |                                |              |                      |
| Q63Z42                                                                               | 3             | 3.8521           | R.WDYPEGTPNGGSTTLPSAPPASAGLK.S | 2            | Q63Z42_HUMAN         |
| <b><i>Putative uncharacterized protein DKFZp761F0123 - Homo sapiens (Human)</i></b>  |               |                  |                                |              |                      |
| Q7L8J4                                                                               | 3             | 4.1655           | R.IQEELEHLNQASEEINQVELQLDEAR.T | 1            | Q7L8J4_HUMAN         |
| Q7L8J4                                                                               | 2             | 3.658            | K.VTELEQQVAQAK.T               | 2            | Q7L8J4_HUMAN         |
| <b><i>Putative uncharacterized protein DKFZp779L1068 - Homo sapiens (Human)</i></b>  |               |                  |                                |              |                      |
| Q629K1                                                                               | 3             | 3.888            | K.DAATIKLPVDQYRK.Q             | 1            | Q629K1_HUMAN         |
| <b><i>Putative uncharacterized protein FLJ20035 - Homo sapiens (Human)</i></b>       |               |                  |                                |              |                      |
| Q8IY21                                                                               | 2             | 3.1084           | R.FYGNLSLETVSSK.I              | 1            | Q8IY21_HUMAN         |
| <b><i>Putative uncharacterized protein FLJ20628 - Homo sapiens (Human)</i></b>       |               |                  |                                |              |                      |
| Q9BVS5                                                                               | 2             | 2.7108           | R.ELEDSSGDQGR.C                | 1            | Q9BVS5_HUMA          |
| <b><i>Putative uncharacterized protein LBH - Homo sapiens (Human)</i></b>            |               |                  |                                |              |                      |
| Q53QV2                                                                               | 2             | 3.5833           | R.KDGLSYQIFPDPDFDR.C           | 2            | Q53QV2_HUMA          |
| <b><i>Putative uncharacterized protein LOC114984 - Homo sapiens (Human)</i></b>      |               |                  |                                |              |                      |
| Q96CP2                                                                               | 2             | 3.4961           | K.ALLQTHPEAQR.A                | 2            | Q96CP2_HUMA          |
| Q96CP2                                                                               | 2             | 4.3216           | K.ASQEPSPKPGTEVIPAAPR.K        | 3            | Q96CP2_HUMA          |
| Q96CP2                                                                               | 2             | 3.5483           | R.AIEAAPQEPEQKR.S              | 1            | Q96CP2_HUMA          |
| <b><i>Putative uncharacterized protein LOC134121 - Homo sapiens (Human)</i></b>      |               |                  |                                |              |                      |
| A4QMS7                                                                               | 1             | 2.3315           | R.LDYDQK.L                     | 3            | A4QMS7_HUMA          |
| <b><i>Putative uncharacterized protein LOC144097 - Homo sapiens (Human)</i></b>      |               |                  |                                |              |                      |
| Q9BUA3                                                                               | 3             | 4.1775           | R.MPAEIVVLLDSEDNPSLPKR.S       | 2            | Q9BUA3_HUMA          |
| <b><i>Putative uncharacterized protein LOC255374 - Homo sapiens (Human)</i></b>      |               |                  |                                |              |                      |
| A4D2B0                                                                               | 2             | 3.8589           | R.GSGGAEAALEEAAAR.G            | 1            | A4D2B0_HUMAN         |
| <b><i>Putative uncharacterized protein LOC388900 - Homo sapiens (Human)</i></b>      |               |                  |                                |              |                      |
| Q5TG08                                                                               | 2             | 2.8359           | K.ANHMFIPPSAVNEESPDKTK.G       | 1            | YV009_HUMAN          |
| <b><i>Putative uncharacterized protein MGC29506 - Homo sapiens (Human)</i></b>       |               |                  |                                |              |                      |
| Q8WU39                                                                               | 2             | 3.9947           | R.AVAYQM#WQNLAK.A              | 8            | Q8WU39_HUMA          |
| Q8WU39                                                                               | 2             | 4.1911           | R.AVAYQM#WQNLAK.A              | 6            | Q8WU39_HUMA          |
| Q8WU39                                                                               | 2             | 4.1903           | R.ELSELVYTDVLDLDR.S            | 4            | Q8WU39_HUMA          |
| Q8WU39                                                                               | 1             | 2.4729           | R.NWQDYGVR.E                   | 2            | Q8WU39_HUMA          |

| <i>Accession No*</i>                                                                               | <i>Charge</i> | <i>XC(Max)**</i> | <i>Peptide*</i>         | <i>TC***</i> | <i>Reference No*</i> |
|----------------------------------------------------------------------------------------------------|---------------|------------------|-------------------------|--------------|----------------------|
| <b><i>Putative uncharacterized protein PTPN18 - Homo sapiens (Human)</i></b>                       |               |                  |                         |              |                      |
| Q53P42                                                                                             | 2             | 3.8034           | R.GAPAGAGSGTQTGTGTGAR.S | 1            | Q53P42_HUMAN         |
| <b><i>PX domain-containing protein kinase-like protein - Homo sapiens (Human)</i></b>              |               |                  |                         |              |                      |
| Q7Z7A4                                                                                             | 3             | 4.7509           | K.RSALENSEEHSK.Y        | 1            | PXK_HUMAN            |
| Q7Z7A4                                                                                             | 2             | 3.9003           | R.GALLSSIQNFQK.G        | 4            | PXK_HUMAN            |
| Q7Z7A4                                                                                             | 2             | 3.2491           | R.SALENSEEHSK.Y         | 1            | PXK_HUMAN            |
| <b><i>Pyridoxal-dependent decarboxylase domain-containing protein 1 - Homo sapiens (Human)</i></b> |               |                  |                         |              |                      |
| Q6P996                                                                                             | 2             | 3.3763           | K.AQGAGVTLPTPSGSR.T     | 1            | PDXD1_HUMAN          |
| Q6P996                                                                                             | 2             | 3.9937           | K.GVPHPEDDHSQVEGPESLR.- | 2            | PDXD1_HUMAN          |
| <b><i>Pyridoxine-5'-phosphate oxidase - Homo sapiens (Human)</i></b>                               |               |                  |                         |              |                      |
| Q9NVS9                                                                                             | 2             | 3.9218           | R.EAFEETHLTSLDPVK.Q     | 3            | PNPO_HUMAN           |
| <b><i>Pyruvate kinase isozymes 2/3 - Homo sapiens (Human)</i></b>                                  |               |                  |                         |              |                      |
| P14618                                                                                             | 2             | 2.8432           | R.NTGIICTGPASR.S        | 1            | KPYM_HUMAN           |
| P14618                                                                                             | 2             | 3.6427           | K.IYVDDGLISLQVK.Q       | 1            | KPYM_HUMAN           |
| P14618                                                                                             | 2             | 3.95             | R.LDIDSPITAR.N          | 5            | KPYM_HUMAN           |
| <b><i>Quinone oxidoreductase - Homo sapiens (Human)</i></b>                                        |               |                  |                         |              |                      |
| Q08257                                                                                             | 2             | 3.0091           | R.VFEFGGPEVLK.L         | 1            | QOR_HUMAN            |
| <b><i>R3H domain-containing protein 1 - Homo sapiens (Human)</i></b>                               |               |                  |                         |              |                      |
| Q15032                                                                                             | 2             | 4.2109           | R.LQDEDASSTQQR.R        | 2            | R3HD1_HUMAN          |
| <b><i>Rab effector MyRIP - Homo sapiens (Human)</i></b>                                            |               |                  |                         |              |                      |
| Q8NFW9                                                                                             | 2             | 2.8299           | K.EEERLSELKQK.L         | 1            | MYRIP_HUMAN          |
| <b><i>Rab GTPase-activating protein 1 - Homo sapiens (Human)</i></b>                               |               |                  |                         |              |                      |
| Q9Y3P9                                                                                             | 2             | 3.3622           | K.IVGNQSEQLQK.E         | 2            | RBGP1_HUMAN          |
| <b><i>Rab GTPase-binding effector protein 1 - Homo sapiens (Human)</i></b>                         |               |                  |                         |              |                      |
| Q15276                                                                                             | 3             | 5.2642           | R.AQASEILLEELQQGLSQAK.R | 2            | RABE1_HUMAN          |
| Q15276                                                                                             | 3             | 4.597            | R.QNAVLQAAQDDLGLHR.T    | 4            | RABE1_HUMAN          |
| Q15276                                                                                             | 2             | 4.5005           | R.TQLWEAQAEEMENIK.A     | 5            | RABE1_HUMAN          |
| Q15276                                                                                             | 2             | 3.2545           | R.MEIVLTSEQLR.Q         | 2            | RABE1_HUMAN          |
| Q15276                                                                                             | 2             | 4.5711           | R.LVSETEWNLLQK.E        | 3            | RABE1_HUMAN          |
| Q15276                                                                                             | 2             | 4.1069           | R.AQQQLEQEFNQK.R        | 1            | RABE1_HUMAN          |
| Q15276                                                                                             | 2             | 3.5248           | K.QLGGIQIEAETR.D        | 2            | RABE1_HUMAN          |
| Q15276                                                                                             | 2             | 2.7563           | K.LSQTLLQVQLER.I        | 1            | RABE1_HUMAN          |
| Q15276                                                                                             | 2             | 3.3209           | K.DQEDDEQQRLNK.R        | 1            | RABE1_HUMAN          |
| Q15276                                                                                             | 2             | 3.5274           | K.ATVEQLMFEEK.N         | 2            | RABE1_HUMAN          |
| Q15276                                                                                             | 2             | 3.2182           | K.ANDQFLESQR.L          | 2            | RABE1_HUMAN          |



| <i>Accession No*</i>                                                       | <i>Charge</i> | <i>XC(Max)**</i> | <i>Peptide*</i>                   | <i>TC***</i> | <i>Reference No*</i> |
|----------------------------------------------------------------------------|---------------|------------------|-----------------------------------|--------------|----------------------|
| Q15276                                                                     | 3             | 3.7896           | K.AIATVSENTKQEAIDEVKR.Q           | 1            | RABE1_HUMAN          |
| Q15276                                                                     | 1             | 2.2645           | K.ALGYNYK.A                       | 1            | RABE1_HUMAN          |
| <b><i>Rab GTPase-binding effector protein 2 - Homo sapiens (Human)</i></b> |               |                  |                                   |              |                      |
| Q9H5N1                                                                     | 2             | 3.0431           | R.LQAQEHGAER.L                    | 1            | RABE2_HUMAN          |
| <b><i>Rab11 family-interacting protein 1 - Homo sapiens (Human)</i></b>    |               |                  |                                   |              |                      |
| Q6WKZ4                                                                     | 2             | 4.0167           | K.TPLSQSMSVLPTSKPEK.V             | 2            | RFIP1_HUMAN          |
| Q6WKZ4                                                                     | 3             | 5.8882           | K.ASDHEGLLSDDLQDLVSDFK.S          | 2            | RFIP1_HUMAN          |
| Q6WKZ4                                                                     | 2             | 3.2061           | K.DTAAVVS.R                       | 2            | RFIP1_HUMAN          |
| Q6WKZ4                                                                     | 3             | 3.776            | K.EGMLMGVKGEDASGPAEDLVR.R         | 1            | RFIP1_HUMAN          |
| <b><i>Rab11 family-interacting protein 3 - Homo sapiens (Human)</i></b>    |               |                  |                                   |              |                      |
| O75154                                                                     | 2             | 3.6494           | R.LQQLEENSELR.S                   | 1            | RFIP3_HUMAN          |
| O75154                                                                     | 2             | 3.6891           | R.ANALLEEQKELR.A                  | 1            | RFIP3_HUMAN          |
| O75154                                                                     | 2             | 3.3916           | K.SIEIENLQTR.L                    | 2            | RFIP3_HUMAN          |
| O75154                                                                     | 2             | 3.8237           | K.LLDEIESLTLR.L                   | 2            | RFIP3_HUMAN          |
| <b><i>Rab11 family-interacting protein 5 - Homo sapiens (Human)</i></b>    |               |                  |                                   |              |                      |
| Q9BXF6                                                                     | 4             | 4.8199           | K.KKYDLESASAILPSSAIEDPDLGSLGK.M   | 2            | RFIP5_HUMAN          |
| Q9BXF6                                                                     | 4             | 5.3533           | K.VLAPGASHPGEIEGARLPEGKPVQVATPIVA | 2            | RFIP5_HUMAN          |
| Q9BXF6                                                                     | 2             | 4.6691           | R.ALLDLQGHLDAAASR.S               | 2            | RFIP5_HUMAN          |
| Q9BXF6                                                                     | 3             | 4.3612           | R.KSSLTQSNTSLGSDSTLSSASGSLAYQGPGA | 1            | RFIP5_HUMAN          |
| Q9BXF6                                                                     | 2             | 3.9384           | R.SSISGSLPSSGSLQAVSSR.F           | 4            | RFIP5_HUMAN          |
| Q9BXF6                                                                     | 2             | 3.534            | R.SSWLSTEGGR.D                    | 3            | RFIP5_HUMAN          |
| <b><i>RAB3A-interacting protein-like 1 - Homo sapiens (Human)</i></b>      |               |                  |                                   |              |                      |
| Q8TBN0                                                                     | 2             | 4.2761           | R.GKIDMLQAEVTALK.T                | 1            | Q8TBN0_HUMA          |
| <b><i>Rabenosyn-5 - Homo sapiens (Human)</i></b>                           |               |                  |                                   |              |                      |
| Q9H1K0                                                                     | 2             | 3.1641           | K.TPSLSSTQPTR.V                   | 2            | RBNS5_HUMAN          |
| Q9H1K0                                                                     | 2             | 2.892            | R.VWSGPPAVGQER.L                  | 2            | RBNS5_HUMAN          |
| <b><i>Rab-interacting lysosomal protein - Homo sapiens (Human)</i></b>     |               |                  |                                   |              |                      |
| Q96NA2                                                                     | 2             | 3.9153           | K.AESSEDETSSPAPSK.L               | 2            | RILP_HUMAN           |
| <b><i>Radixin - Homo sapiens (Human)</i></b>                               |               |                  |                                   |              |                      |
| P35241                                                                     | 2             | 3.2063           | R.AKEEAERLEK.E                    | 1            | RADI_HUMAN           |
| P35241                                                                     | 2             | 3.2644           | R.SEEERVTTETQK.N                  | 2            | RADI_HUMAN           |
| P35241                                                                     | 2             | 4.452            | K.TQNDVLHAENVK.A                  | 1            | RADI_HUMAN           |
| P35241                                                                     | 2             | 4.6018           | K.QLQALSSELAQAR.D                 | 4            | RADI_HUMAN           |
| P35241                                                                     | 2             | 4.6731           | K.KTQNDVLHAENVK.A                 | 1            | RADI_HUMAN           |
| P35241                                                                     | 2             | 3.0082           | K.AQKELEEQTR.K                    | 1            | RADI_HUMAN           |

| <i>Accession No*</i>                                                                                     | <i>Charge</i> | <i>XC(Max)**</i> | <i>Peptide*</i>                   | <i>TC***</i> | <i>Reference No*</i> |
|----------------------------------------------------------------------------------------------------------|---------------|------------------|-----------------------------------|--------------|----------------------|
| P35241                                                                                                   | 2             | 2.8776           | K.QRIDEFEAM.-                     | 1            | RADI_HUMAN           |
| P35241                                                                                                   | 2             | 3.9846           | R.SEEERVTTETQKNER.V               | 4            | RADI_HUMAN           |
| <b><i>Rafilin - Homo sapiens (Human)</i></b>                                                             |               |                  |                                   |              |                      |
| Q14699                                                                                                   | 2             | 2.9032           | K.QPSSPSGEGDGGELSPQGVSK.T         | 2            | RFTN1_HUMAN          |
| <b><i>RalA-binding protein 1 - Homo sapiens (Human)</i></b>                                              |               |                  |                                   |              |                      |
| Q15311                                                                                                   | 2             | 2.9766           | R.RVEHGSGLTR.T                    | 1            | RBP1_HUMAN           |
| <b><i>Ran-binding protein 3 - Homo sapiens (Human)</i></b>                                               |               |                  |                                   |              |                      |
| Q9H6Z4                                                                                                   | 2             | 3.2081           | R.SRVEQEQAEM                      | 1            | RANB3_HUMAN          |
| Q9H6Z4                                                                                                   | 3             | 4.0237           | R.SVLRPAVLQAPQPK.A                | 2            | RANB3_HUMAN          |
| <b><i>Ran-specific GTPase-activating protein - Homo sapiens (Human)</i></b>                              |               |                  |                                   |              |                      |
| P43487                                                                                                   | 2             | 3.9566           | K.TLEEDDEELFK.M                   | 3            | RANG_HUMAN           |
| P43487                                                                                                   | 1             | 3.5914           | R.FLNAENAQK.F                     | 13           | RANG_HUMAN           |
| P43487                                                                                                   | 2             | 4.6548           | R.FASENDLPEWKER.G                 | 3            | RANG_HUMAN           |
| P43487                                                                                                   | 2             | 3.5362           | K.TLEEDDEELFKM#R.A                | 4            | RANG_HUMAN           |
| P43487                                                                                                   | 2             | 3.297            | K.EETKEDAEKQ.-                    | 4            | RANG_HUMAN           |
| P43487                                                                                                   | 2             | 3.0269           | R.FASENDLPEWK.E                   | 2            | RANG_HUMAN           |
| <b><i>Rap guanine nucleotide exchange factor 2 - Homo sapiens (Human)</i></b>                            |               |                  |                                   |              |                      |
| Q9Y4G8                                                                                                   | 2             | 4.4711           | K.ILSLSEEGSLER.H                  | 1            | RPGF2_HUMAN          |
| Q9Y4G8                                                                                                   | 2             | 3.2768           | R.ESLEQAQSR.A                     | 1            | RPGF2_HUMAN          |
| Q9Y4G8                                                                                                   | 2             | 3.1638           | R.KPPDYNVALQR.S                   | 2            | RPGF2_HUMAN          |
| Q9Y4G8                                                                                                   | 3             | 4.7371           | R.YSIDPLAVDVEQVIGLEK.V            | 1            | RPGF2_HUMAN          |
| <b><i>Ras and Rab interactor 2 - Homo sapiens (Human)</i></b>                                            |               |                  |                                   |              |                      |
| Q8WYP3                                                                                                   | 3             | 4.1782           | K.TLSSGRRPGAGPELELGTAGSPGGAPPEAAP | 1            | RIN2_HUMAN           |
| <b><i>Ras association domain-containing protein 8 - Homo sapiens (Human)</i></b>                         |               |                  |                                   |              |                      |
| Q8NHQ8                                                                                                   | 2             | 4.1178           | R.QVNLQQFIQQTGTK.V                | 1            | RASF8_HUMAN          |
| <b><i>Ras GTPase-activating protein-binding protein 1 - Homo sapiens (Human)</i></b>                     |               |                  |                                   |              |                      |
| Q13283                                                                                                   | 2             | 4.2773           | K.SSSPAPADIAQTVQEDLR.T            | 1            | G3BP1_HUMAN          |
| Q13283                                                                                                   | 2             | 3.3808           | R.TFSWASVTSK.N                    | 2            | G3BP1_HUMAN          |
| <b><i>Ras GTPase-activating protein-binding protein 2 - Homo sapiens (Human)</i></b>                     |               |                  |                                   |              |                      |
| Q9UN86                                                                                                   | 3             | 4.4549           | K.GVGGKLPNFGFVVFDSEPVQR.I         | 1            | G3BP2_HUMAN          |
| Q9UN86                                                                                                   | 2             | 3.6836           | R.VEAKPEVQSQPPR.V                 | 2            | G3BP2_HUMAN          |
| <b><i>Ras GTPase-activating-like protein IQGAP1 - Homo sapiens (Human)</i></b>                           |               |                  |                                   |              |                      |
| P46940                                                                                                   | 2             | 2.8142           | K.ATFYGEQVDYYK.S                  | 1            | IQGA1_HUMAN          |
| P46940                                                                                                   | 3             | 4.4763           | K.SVKEDSNLTLQEKK.E                | 1            | IQGA1_HUMAN          |
| <b><i>Ras-associated and pleckstrin homology domains-containing protein 1 - Homo sapiens (Human)</i></b> |               |                  |                                   |              |                      |

| <i>Accession No*</i>                                                                        | <i>Charge</i> | <i>XC(Max)**</i> | <i>Peptide*</i>                  | <i>TC***</i> | <i>Reference No*</i> |
|---------------------------------------------------------------------------------------------|---------------|------------------|----------------------------------|--------------|----------------------|
| Q70E73                                                                                      | 2             | 4.0877           | K.SSLSVQPGFLADLNR.T              | 1            | RAPH1_HUMAN          |
| Q70E73                                                                                      | 2             | 3.4218           | K.SSSGAEHPEPK.R                  | 10           | RAPH1_HUMAN          |
| Q70E73                                                                                      | 2             | 3.0806           | K.RPSVDSLVS.K.F                  | 1            | RAPH1_HUMAN          |
| Q70E73                                                                                      | 3             | 4.7276           | K.KQPAFPASYIPSPPTPPVPVPPPTLPK.Q  | 2            | RAPH1_HUMAN          |
| Q70E73                                                                                      | 3             | 5.113            | K.AGYGGSHISGYATLR.R              | 5            | RAPH1_HUMAN          |
| Q70E73                                                                                      | 3             | 4.5156           | R.LTQAEISEQPTM#ATVVPQVPTSPK.S    | 1            | RAPH1_HUMAN          |
| <b><i>Ras-interacting protein 1 - Homo sapiens (Human)</i></b>                              |               |                  |                                  |              |                      |
| Q5U651                                                                                      | 2             | 4.1828           | K.IFGAGLASGANYK.S                | 2            | RAIN_HUMAN           |
| Q5U651                                                                                      | 2             | 3.9784           | K.KLPELAAGVAPEPPLATR.A           | 2            | RAIN_HUMAN           |
| Q5U651                                                                                      | 3             | 4.6366           | R.AASGGAALASPGPGTGSGAPAGSGGK.E   | 5            | RAIN_HUMAN           |
| Q5U651                                                                                      | 3             | 5.1279           | R.AASGGAALASPGPGTGSGAPAGSGGKER.S | 2            | RAIN_HUMAN           |
| Q5U651                                                                                      | 2             | 5.0149           | R.GSGTGTGSSGAGGPGTPGGAQR.W       | 6            | RAIN_HUMAN           |
| Q5U651                                                                                      | 3             | 6.5914           | R.RLEQEAFGAADSEGTGAPSWRPQK.N     | 1            | RAIN_HUMAN           |
| <b><i>Ras-related protein Rab-10 - Homo sapiens (Human)</i></b>                             |               |                  |                                  |              |                      |
| P61026                                                                                      | 2             | 3.0886           | K.AFLTAEIDLK.R                   | 1            | RAB10_HUMAN          |
| <b><i>Ras-related protein Rab-1A - Homo sapiens (Human)</i></b>                             |               |                  |                                  |              |                      |
| P62820                                                                                      | 2             | 2.9371           | R.MGPGATAGGAEK.S                 | 1            | RAB1A_HUMAN          |
| <b><i>Ras-related protein Rab-7a - Homo sapiens (Human)</i></b>                             |               |                  |                                  |              |                      |
| P51149                                                                                      | 2             | 4.0456           | K.EAINVEQAFQTIAR.N               | 1            | RAB7A_HUMAN          |
| <b><i>RAS-responsive element-binding protein 1 - Homo sapiens (Human)</i></b>               |               |                  |                                  |              |                      |
| Q92766                                                                                      | 2             | 4.2248           | K.LAEGDGEAGAGGAASQEQL            | 2            | RREB1_HUMAN          |
| <b><i>RBMY2FP protein - Homo sapiens (Human)</i></b>                                        |               |                  |                                  |              |                      |
| Q8TC46                                                                                      | 1             | 2.6396           | K.DGTIGLKENK.F                   | 2            | Q8TC46_HUMA          |
| <b><i>Receptor expression-enhancing protein 5 - Homo sapiens (Human)</i></b>                |               |                  |                                  |              |                      |
| Q00765                                                                                      | 2             | 2.9125           | K.KATVNLLGEEK.K                  | 1            | REEP5_HUMAN          |
| <b><i>Receptor-interacting serine/threonine-protein kinase 2 - Homo sapiens (Human)</i></b> |               |                  |                                  |              |                      |
| O43353                                                                                      | 2             | 2.9239           | R.LQPGIAQQWQSK.R                 | 2            | RIPK2_HUMAN          |
| O43353                                                                                      | 2             | 2.9573           | R.SPSSLNLLQNK.S                  | 1            | RIPK2_HUMAN          |
| <b><i>Regulator of G-protein signaling 10 - Homo sapiens (Human)</i></b>                    |               |                  |                                  |              |                      |
| O43665                                                                                      | 2             | 3.2187           | K.MQDKTQMKEK.A                   | 2            | RGS10_HUMAN          |
| O43665                                                                                      | 2             | 3.1938           | R.TEEEEEDLPDAQTAAGR.A            | 1            | RGS10_HUMAN          |
| O43665                                                                                      | 2             | 3.7748           | K.WAASLENLLEDPEGVKR.F            | 2            | RGS10_HUMAN          |
| O43665                                                                                      | 2             | 3.5416           | K.ILEEPHPLMFQK.L                 | 1            | RGS10_HUMAN          |
| O43665                                                                                      | 2             | 2.8035           | K.ASSQVNVVEGQSR.L                | 1            | RGS10_HUMAN          |
| O43665                                                                                      | 2             | 3.9507           | R.TEEEEEDLPDAQTAAGR.R            | 3            | RGS10_HUMAN          |

| <i>Accession No*</i>                                                        | <i>Charge</i> | <i>XC(Max)**</i> | <i>Peptide*</i>                | <i>TC***</i> | <i>Reference No*</i> |
|-----------------------------------------------------------------------------|---------------|------------------|--------------------------------|--------------|----------------------|
| <b><i>Regulator of G-protein signaling 12 - Homo sapiens (Human)</i></b>    |               |                  |                                |              |                      |
| O14924                                                                      | 2             | 5.008            | R.LPPGSTELTLPTPAAVAK.G         | 2            | RGS12_HUMAN          |
| <b><i>Regulator of nonsense transcripts 1 - Homo sapiens (Human)</i></b>    |               |                  |                                |              |                      |
| Q92900                                                                      | 2             | 3.8255           | R.AYQHGGVTGLSQY.-              | 6            | RENT1_HUMAN          |
| <b><i>Regulator of nonsense transcripts 3A - Homo sapiens (Human)</i></b>   |               |                  |                                |              |                      |
| Q9H1J1                                                                      | 2             | 3.2978           | K.AEGSGTGPEKREEAE.-            | 1            | REN3A_HUMAN          |
| Q9H1J1                                                                      | 2             | 3.5905           | K.GSQDSGAPGEAM#ER.L            | 3            | REN3A_HUMAN          |
| Q9H1J1                                                                      | 2             | 2.9526           | R.SQEQESEAQR.Y                 | 1            | REN3A_HUMAN          |
| <b><i>Regulator of nonsense transcripts 3B - Homo sapiens (Human)</i></b>   |               |                  |                                |              |                      |
| Q9BZ17                                                                      | 2             | 4.4868           | K.KAESTESIGSSEK.T              | 2            | REN3B_HUMAN          |
| Q9BZ17                                                                      | 3             | 4.9346           | K.KAESTESIGSSEKTEK.K           | 2            | REN3B_HUMAN          |
| Q9BZ17                                                                      | 2             | 2.9516           | K.FLESYATDNEK.M                | 1            | REN3B_HUMAN          |
| Q9BZ17                                                                      | 2             | 3.8086           | K.NQEDIILFR.D                  | 1            | REN3B_HUMAN          |
| <b><i>Remodeling and spacing factor 1 - Homo sapiens (Human)</i></b>        |               |                  |                                |              |                      |
| Q96T23                                                                      | 2             | 2.9418           | K.DADSSISVLEIHSQK.A            | 1            | RSF1_HUMAN           |
| Q96T23                                                                      | 3             | 4.4045           | R.FDEFDEAIDEAIEDDIKEADGGGVGR.G | 1            | RSF1_HUMAN           |
| <b><i>Replication factor C subunit 1 - Homo sapiens (Human)</i></b>         |               |                  |                                |              |                      |
| P35251                                                                      | 2             | 4.5058           | K.DTEAGETFSSVQANLSK.A          | 2            | RFC1_HUMAN           |
| P35251                                                                      | 2             | 2.9577           | K.ELSQNTDESGLNDEAIAK.Q         | 1            | RFC1_HUMAN           |
| P35251                                                                      | 2             | 2.8645           | K.TKSDEETLK.A                  | 2            | RFC1_HUMAN           |
| <b><i>Replication protein A 14 kDa subunit - Homo sapiens (Human)</i></b>   |               |                  |                                |              |                      |
| P35244                                                                      | 3             | 4.0003           | K.IIHDFPQFYPLGIVQHD.-          | 1            | RFA3_HUMAN           |
| <b><i>Response gene to complement 32 protein - Homo sapiens (Human)</i></b> |               |                  |                                |              |                      |
| Q9H4X1                                                                      | 2             | 2.8122           | K.ELEAFIADLDK.T                | 1            | RGC32_HUMAN          |
| Q9H4X1                                                                      | 2             | 3.1609           | R.SSASVSDSSGFSDESADSLYR.N      | 1            | RGC32_HUMAN          |
| Q9H4X1                                                                      | 3             | 5.1191           | K.LGDTKLEAFIADLDK.T            | 2            | RGC32_HUMAN          |
| Q9H4X1                                                                      | 2             | 3.9118           | K.LNSPTDSTPALLSATVTPQK.A       | 1            | RGC32_HUMAN          |
| <b><i>Reticulocalbin-1 precursor - Homo sapiens (Human)</i></b>             |               |                  |                                |              |                      |
| Q15293                                                                      | 2             | 3.85             | R.EQFNEFRDLNK.D                | 2            | RCN1_HUMAN           |
| Q15293                                                                      | 2             | 3.8577           | K.TFDQLTPDESKER.L              | 3            | RCN1_HUMAN           |
| Q15293                                                                      | 1             | 2.6193           | R.YIFDNVAK.V                   | 5            | RCN1_HUMAN           |
| Q15293                                                                      | 2             | 2.9807           | R.IDNDGDGFVTTEELK.T            | 2            | RCN1_HUMAN           |
| Q15293                                                                      | 3             | 4.2383           | R.HWILPQDYDHAQAEAR.H           | 5            | RCN1_HUMAN           |
| Q15293                                                                      | 2             | 4.7945           | R.HLVYESDKNKDEK.L              | 2            | RCN1_HUMAN           |
| Q15293                                                                      | 2             | 4.8636           | K.AADLNGDLTATR.E               | 2            | RCN1_HUMAN           |

| <i>Accession No*</i>                                                   | <i>Charge</i> | <i>XC(Max)**</i> | <i>Peptide*</i>                   | <i>TC***</i> | <i>Reference No*</i> |
|------------------------------------------------------------------------|---------------|------------------|-----------------------------------|--------------|----------------------|
| Q15293                                                                 | 2             | 2.7805           | K.RYIFDNVAK.V                     | 1            | RCN1_HUMAN           |
| Q15293                                                                 | 4             | 6.1303           | K.LTKEEILENWNMFVGSQATNYGEDLTKNHDE | 2            | RCN1_HUMAN           |
| Q15293                                                                 | 2             | 5.0078           | K.IVDRIDNDGDGFVTTEELK.T           | 22           | RCN1_HUMAN           |
| Q15293                                                                 | 2             | 2.8042           | K.DGKLDKDEIR.H                    | 2            | RCN1_HUMAN           |
| Q15293                                                                 | 2             | 4.5175           | R.FKAADLNGDLTATR.E                | 1            | RCN1_HUMAN           |
| <b><i>Reticulocalbin-2 precursor - Homo sapiens (Human)</i></b>        |               |                  |                                   |              |                      |
| Q14257                                                                 | 3             | 4.2843           | R.SDYDREALLGVQEDVDEYVK.L          | 1            | RCN2_HUMAN           |
| Q14257                                                                 | 2             | 3.1295           | K.HYAMQEAK.Q                      | 2            | RCN2_HUMAN           |
| Q14257                                                                 | 2             | 4.6199           | K.LSEEEILENPDLFLTSEATDYGR.Q       | 2            | RCN2_HUMAN           |
| <b><i>Reticulocalbin-3 precursor - Homo sapiens (Human)</i></b>        |               |                  |                                   |              |                      |
| Q96D15                                                                 | 3             | 4.983            | R.VHQAAPLSDAPHDDAHGNFQYDHEAFLGR.E | 2            | RCN3_HUMAN           |
| Q96D15                                                                 | 2             | 3.225            | R.VADQDGDMSMATR.E                 | 1            | RCN3_HUMAN           |
| Q96D15                                                                 | 2             | 3.415            | R.VADQDGDMS#ATR.E                 | 3            | RCN3_HUMAN           |
| Q96D15                                                                 | 2             | 5.115            | R.EVAKEFDQLTPEESQAR.L             | 3            | RCN3_HUMAN           |
| Q96D15                                                                 | 2             | 5.185            | R.DIVIAETLEDLDRNK.D               | 1            | RCN3_HUMAN           |
| Q96D15                                                                 | 2             | 3.7092           | K.EFDQLTPEESQAR.L                 | 1            | RCN3_HUMAN           |
| Q96D15                                                                 | 2             | 4.4691           | R.AGDGDGWVSLAELR.A                | 5            | RCN3_HUMAN           |
| <b><i>Reticulon-1 - Homo sapiens (Human)</i></b>                       |               |                  |                                   |              |                      |
| Q16799                                                                 | 3             | 4.4635           | R.HRGEGENEAVTPK.G                 | 4            | RTN1_HUMAN           |
| Q16799                                                                 | 2             | 3.0756           | R.GLFSSDSGIEM#TPAESTEVENK.I       | 1            | RTN1_HUMAN           |
| Q16799                                                                 | 2             | 2.9982           | R.RAPQITTPVK.I                    | 1            | RTN1_HUMAN           |
| Q16799                                                                 | 3             | 3.8561           | K.GLSYETAENPRPVGQLADRPEVK.A       | 1            | RTN1_HUMAN           |
| Q16799                                                                 | 2             | 3.5409           | K.GATPAPQAGEPSPGLGAR.A            | 2            | RTN1_HUMAN           |
| Q16799                                                                 | 2             | 4.2664           | K.ILADPLDQMKAEAYK.Y               | 2            | RTN1_HUMAN           |
| <b><i>Retinal dehydrogenase 1 - Homo sapiens (Human)</i></b>           |               |                  |                                   |              |                      |
| P00352                                                                 | 2             | 4.5062           | K.GYFVQPTVFSNVTDEMR.I             | 2            | AL1A1_HUMAN          |
| <b><i>Retinoblastoma-associated protein - Homo sapiens (Human)</i></b> |               |                  |                                   |              |                      |
| P06400                                                                 | 2             | 3.134            | K.ISEGLPTPTK.M                    | 2            | RB_HUMAN             |
| <b><i>Retinoblastoma-binding protein 6 - Homo sapiens (Human)</i></b>  |               |                  |                                   |              |                      |
| Q7Z6E9                                                                 | 3             | 4.2431           | K.DVSHEIIQHEVK.S                  | 2            | RBBP6_HUMAN          |
| Q7Z6E9                                                                 | 2             | 3.458            | K.EHQETKPVKEEK.V                  | 2            | RBBP6_HUMAN          |
| <b><i>Rho GDP-dissociation inhibitor 1 - Homo sapiens (Human)</i></b>  |               |                  |                                   |              |                      |
| P52565                                                                 | 2             | 4.8268           | K.SIQEIQLDKDDESLR.K               | 1            | GDIR_HUMAN           |
| P52565                                                                 | 3             | 3.9063           | K.SIQEIQLDKDDESLRK.Y              | 3            | GDIR_HUMAN           |
| <b><i>Rho GDP-dissociation inhibitor 2 - Homo sapiens (Human)</i></b>  |               |                  |                                   |              |                      |

| <i>Accession No*</i>                                                  | <i>Charge</i> | <i>XC(Max)**</i> | <i>Peptide*</i>                   | <i>TC***</i> | <i>Reference No*</i> |
|-----------------------------------------------------------------------|---------------|------------------|-----------------------------------|--------------|----------------------|
| P52566                                                                | 3             | 4.2295           | K.ATFMVGSYGPRPEEYFLTPVEEAPK.G     | 1            | GDIS_HUMAN           |
| P52566                                                                | 2             | 4.0339           | K.TLLGDGPVVTDPK.A                 | 4            | GDIS_HUMAN           |
| P52566                                                                | 2             | 5.3977           | K.SLKELQEMDKDDESLIK.Y             | 7            | GDIS_HUMAN           |
| P52566                                                                | 2             | 4.7325           | K.ELQEMDKDDESLIK.Y                | 4            | GDIS_HUMAN           |
| P52566                                                                | 3             | 3.9669           | K.SLKELQEM#DKDDESLIK.Y            | 2            | GDIS_HUMAN           |
| <b><i>Rho GTPase-activating protein 17 - Homo sapiens (Human)</i></b> |               |                  |                                   |              |                      |
| Q68EM7                                                                | 2             | 4.3144           | K.DPVSAAVPAPGR.N                  | 3            | RHG17_HUMAN          |
| Q68EM7                                                                | 2             | 2.8883           | K.TEVLSDLLQIER.R                  | 1            | RHG17_HUMAN          |
| Q68EM7                                                                | 3             | 4.4925           | R.KHISPAFQPPLPPTDGSTVVPAGPEPPPQSS | 2            | RHG17_HUMAN          |
| Q68EM7                                                                | 3             | 5.3472           | R.NRPSVPPPPQPPGVHSAGDSSLTNTAPTASK | 1            | RHG17_HUMAN          |
| Q68EM7                                                                | 3             | 5.3913           | R.SPSPPTQHTGQPPGQPSAPSQLSAPR.R    | 3            | RHG17_HUMAN          |
| <b><i>Rho GTPase-activating protein 18 - Homo sapiens (Human)</i></b> |               |                  |                                   |              |                      |
| Q8N392                                                                | 2             | 3.3415           | K.STNDADVPPQGVIR.V                | 2            | RHG18_HUMAN          |
| Q8N392                                                                | 2             | 3.1589           | R.YGQYTMNQESTTIK.V                | 2            | RHG18_HUMAN          |
| Q8N392                                                                | 2             | 3.715            | K.RVETVSQTLR.K                    | 3            | RHG18_HUMAN          |
| Q8N392                                                                | 2             | 3.9275           | R.FLSQESGVAQTLK.K                 | 2            | RHG18_HUMAN          |
| Q8N392                                                                | 2             | 4.2011           | R.DDEASNLVGEEK.L                  | 3            | RHG18_HUMAN          |
| <b><i>Rho GTPase-activating protein 21 - Homo sapiens (Human)</i></b> |               |                  |                                   |              |                      |
| Q5T5U3                                                                | 2             | 2.7674           | R.TDSAPDQQVETGK.S                 | 1            | Q5T5U3_HUMA          |
| <b><i>Rho GTPase-activating protein 23 - Homo sapiens (Human)</i></b> |               |                  |                                   |              |                      |
| Q9P227                                                                | 2             | 2.7824           | R.WQDLNVISSLLKSFFRK.L             | 1            | RHG23_HUMAN          |
| <b><i>Rho GTPase-activating protein 24 - Homo sapiens (Human)</i></b> |               |                  |                                   |              |                      |
| Q8N264                                                                | 2             | 3.1412           | R.M#GILNSDTLGNPTNVR.N             | 1            | RHG24_HUMAN          |
| <b><i>Rho GTPase-activating protein 25 - Homo sapiens (Human)</i></b> |               |                  |                                   |              |                      |
| P42331                                                                | 2             | 2.8492           | K.SAALEISLR.N                     | 1            | RHG25_HUMAN          |
| P42331                                                                | 3             | 4.9976           | R.TDSFSSMTSDSDTTSPTGQQPSDAFPEDSSK | 2            | RHG25_HUMAN          |
| P42331                                                                | 2             | 4.5051           | K.NSGEEEIDSLQR.M                  | 3            | RHG25_HUMAN          |
| P42331                                                                | 3             | 4.6959           | K.MEIFKNEFWSPSEAK.A               | 2            | RHG25_HUMAN          |
| P42331                                                                | 2             | 3.936            | K.ALEEEVKEFVK.S                   | 3            | RHG25_HUMAN          |
| <b><i>Rho GTPase-activating protein 29 - Homo sapiens (Human)</i></b> |               |                  |                                   |              |                      |
| O15463                                                                | 3             | 5.618            | K.GVTTSLQISGDHSINATQPSKPYAEPVR.S  | 1            | O15463_HUMAN         |
| O15463                                                                | 3             | 3.9967           | K.IQDKQYEQNSLTAK.T                | 1            | O15463_HUMAN         |
| O15463                                                                | 2             | 3.0111           | K.FNGFDQQTQK.I                    | 2            | O15463_HUMAN         |
| <b><i>Rho GTPase-activating protein 30 - Homo sapiens (Human)</i></b> |               |                  |                                   |              |                      |
| Q7Z616                                                                | 3             | 4.1749           | K.ASEDRGEAGGSQETK.V               | 9            | RHG30_HUMAN          |

| <i>Accession No*</i>                                                           | <i>Charge</i> | <i>XC(Max)**</i> | <i>Peptide*</i>                  | <i>TC***</i> | <i>Reference No*</i> |
|--------------------------------------------------------------------------------|---------------|------------------|----------------------------------|--------------|----------------------|
| Q7Z6I6                                                                         | 2             | 3.4455           | R.ESGDGEAEGDQR.A                 | 6            | RHG30_HUMAN          |
| Q7Z6I6                                                                         | 2             | 3.5554           | R.LASTLVQVQQVR.S                 | 1            | RHG30_HUMAN          |
| Q7Z6I6                                                                         | 2             | 3.0596           | R.SYAFETQANPGKGEGL.-             | 1            | RHG30_HUMAN          |
| <b><i>Rho GTPase-activating protein 6 - Homo sapiens (Human)</i></b>           |               |                  |                                  |              |                      |
| O43182                                                                         | 2             | 3.423            | R.LGDAGWLDWQR.E                  | 1            | RHG06_HUMAN          |
| <b><i>Rho guanine nucleotide exchange factor 12 - Homo sapiens (Human)</i></b> |               |                  |                                  |              |                      |
| Q9NZN5                                                                         | 3             | 3.7319           | R.TDCSSGDASRPSSDNADSPK.S         | 1            | ARHGC_HUMAN          |
| Q9NZN5                                                                         | 3             | 4.5634           | R.QSGLANEGTDAGYLPANSMSSVASGASFSQ | 1            | ARHGC_HUMAN          |
| Q9NZN5                                                                         | 2             | 3.1405           | K.QLLVQQLGLTEK.S                 | 2            | ARHGC_HUMAN          |
| Q9NZN5                                                                         | 2             | 3.0556           | K.QVGETSAPGDTLDGTPR.T            | 1            | ARHGC_HUMAN          |
| Q9NZN5                                                                         | 2             | 2.9048           | R.GFPSILGPPR.R                   | 1            | ARHGC_HUMAN          |
| <b><i>Rho guanine nucleotide exchange factor 15 - Homo sapiens (Human)</i></b> |               |                  |                                  |              |                      |
| O94989                                                                         | 2             | 4.389            | R.AQDADAPEPGLQAR.A               | 2            | ARHGF_HUMAN          |
| <b><i>Rho guanine nucleotide exchange factor 16 - Homo sapiens (Human)</i></b> |               |                  |                                  |              |                      |
| Q5VV41                                                                         | 2             | 5.202            | R.LDAGGNPASGLPMVR.G              | 4            | ARHGG_HUMAN          |
| Q5VV41                                                                         | 3             | 4.2382           | K.GLGKPGGQGDALSPK.L              | 1            | ARHGG_HUMAN          |
| Q5VV41                                                                         | 1             | 2.7479           | K.SLAVASK.A                      | 2            | ARHGG_HUMAN          |
| Q5VV41                                                                         | 2             | 3.632            | R.LDAGGNPASGLPM#VR.G             | 3            | ARHGG_HUMAN          |
| <b><i>Rho guanine nucleotide exchange factor 17 - Homo sapiens (Human)</i></b> |               |                  |                                  |              |                      |
| Q96PE2                                                                         | 2             | 5.2818           | R.MGAQQDDGSDAPPSPDWAGDVTR.G      | 7            | ARHGH_HUMAN          |
| Q96PE2                                                                         | 2             | 5.117            | R.RDEGSQDQTGSLSR.A               | 2            | ARHGH_HUMAN          |
| Q96PE2                                                                         | 3             | 4.5559           | R.RPSADSESPGTPSPDGAWEPPAR.E      | 2            | ARHGH_HUMAN          |
| Q96PE2                                                                         | 2             | 3.4809           | R.SARPLTGPETEGR.L                | 3            | ARHGH_HUMAN          |
| Q96PE2                                                                         | 2             | 2.9213           | R.SLSDPIPQR.H                    | 1            | ARHGH_HUMAN          |
| Q96PE2                                                                         | 2             | 3.0758           | R.LDDGSAGTR.D                    | 2            | ARHGH_HUMAN          |
| Q96PE2                                                                         | 2             | 3.9011           | R.YSSTETLKDDDLWSSR.G             | 2            | ARHGH_HUMAN          |
| Q96PE2                                                                         | 3             | 4.2859           | R.ALRDGGFEPEK.S                  | 1            | ARHGH_HUMAN          |
| Q96PE2                                                                         | 2             | 4.5922           | R.SPSFGAGEGLLR.S                 | 5            | ARHGH_HUMAN          |
| Q96PE2                                                                         | 2             | 3.0786           | R.GSGGWGVYR.S                    | 2            | ARHGH_HUMAN          |
| Q96PE2                                                                         | 2             | 5.412            | R.DGGVLPAAAEAAEGPAR.G            | 3            | ARHGH_HUMAN          |
| Q96PE2                                                                         | 3             | 3.778            | R.AQRPADGLHSHWIFSQPQAGAR.A       | 1            | ARHGH_HUMAN          |
| Q96PE2                                                                         | 2             | 3.1816           | R.ALPEALPPPATAHR.N               | 1            | ARHGH_HUMAN          |
| Q96PE2                                                                         | 3             | 4.4907           | R.AATSEPTGFSVDSNLLGSLSPK.T       | 3            | ARHGH_HUMAN          |
| Q96PE2                                                                         | 2             | 4.1082           | K.VSFPSYLASPAGSR.G               | 3            | ARHGH_HUMAN          |
| Q96PE2                                                                         | 2             | 3.8137           | K.SLSNPDIASETLLLSFLR.S           | 3            | ARHGH_HUMAN          |

| <i>Accession No*</i>                                                                    | <i>Charge</i> | <i>XC(Max)**</i> | <i>Peptide*</i>             | <i>TC***</i> | <i>Reference No*</i> |
|-----------------------------------------------------------------------------------------|---------------|------------------|-----------------------------|--------------|----------------------|
| Q96PE2                                                                                  | 2             | 3.594            | K.LADILSPR.L                | 2            | ARHGH_HUMAN          |
| Q96PE2                                                                                  | 2             | 5.3118           | R.DEGSQDQTGSLSR.A           | 10           | ARHGH_HUMAN          |
| <b><i>Rho-associated protein kinase 2 - Homo sapiens (Human)</i></b>                    |               |                  |                             |              |                      |
| O75116                                                                                  | 2             | 2.9636           | K.IQQNQSIR.R                | 2            | ROCK2_HUMAN          |
| <b><i>Ribonucleases P/MRP protein subunit POP1 - Homo sapiens (Human)</i></b>           |               |                  |                             |              |                      |
| Q99575                                                                                  | 2             | 3.7055           | K.AGPEGTSQEIPK.Y            | 1            | POP1_HUMAN           |
| Q99575                                                                                  | 3             | 4.2387           | R.VNPHSLPDPEVNEQSSSK.G      | 2            | POP1_HUMAN           |
| Q99575                                                                                  | 2             | 2.7887           | K.YITASTFAQAR.A             | 1            | POP1_HUMAN           |
| <b><i>Ribonucleoprotein PTB-binding 2 - Homo sapiens (Human)</i></b>                    |               |                  |                             |              |                      |
| Q9HCJ3                                                                                  | 3             | 4.5265           | K.TGIASSILDAISQGSSEQHALEK.C | 2            | RAVR2_HUMAN          |
| <b><i>Ribosomal L1 domain-containing protein 1 - Homo sapiens (Human)</i></b>           |               |                  |                             |              |                      |
| O76021                                                                                  | 3             | 3.744            | K.IKEEAVKEK.S               | 4            | RL1D1_HUMAN          |
| <b><i>Ribosomal protein S6 kinase alpha-3 - Homo sapiens (Human)</i></b>                |               |                  |                             |              |                      |
| P51812                                                                                  | 2             | 2.8136           | R.NQSPVLEPVGR.S             | 1            | KS6A3_HUMAN          |
| <b><i>Ribosome biogenesis protein BMS1 homolog - Homo sapiens (Human)</i></b>           |               |                  |                             |              |                      |
| Q14692                                                                                  | 3             | 3.9646           | R.FLVEAPHDWDLEEVMSIR.D      | 1            | BMS1_HUMAN           |
| <b><i>Ribosome biogenesis regulatory protein homolog - Homo sapiens (Human)</i></b>     |               |                  |                             |              |                      |
| Q15050                                                                                  | 2             | 3.6029           | K.AEQDEAEKLR.I              | 1            | RRS1_HUMAN           |
| <b><i>Ribosome production factor 1 - Homo sapiens (Human)</i></b>                       |               |                  |                             |              |                      |
| Q9H9Y2                                                                                  | 2             | 2.9316           | K.VGIQELGPR.F               | 2            | RPF1_HUMAN           |
| <b><i>Ribosome recycling factor, mitochondrial precursor - Homo sapiens (Human)</i></b> |               |                  |                             |              |                      |
| Q96E11                                                                                  | 2             | 2.8824           | K.SKDTVSEDTIR.L             | 1            | RRFM_HUMAN           |
| <b><i>Ribosome-binding protein 1 - Homo sapiens (Human)</i></b>                         |               |                  |                             |              |                      |
| Q9P2E9                                                                                  | 2             | 4.7139           | K.LLATEQEDAATAVAK.S         | 5            | RRBP1_HUMAN          |
| Q9P2E9                                                                                  | 2             | 3.7587           | K.LKGELESSDQVR.E            | 3            | RRBP1_HUMAN          |
| Q9P2E9                                                                                  | 2             | 3.3004           | K.KTESASVQGR.N              | 6            | RRBP1_HUMAN          |
| Q9P2E9                                                                                  | 2             | 5.1691           | K.KLQEQLKAEDGSSSK.E         | 4            | RRBP1_HUMAN          |
| Q9P2E9                                                                                  | 2             | 2.8706           | K.LQEQLK.A                  | 1            | RRBP1_HUMAN          |
| Q9P2E9                                                                                  | 3             | 5.8756           | K.KKGEPGPPDADGPLYLPYK.T     | 3            | RRBP1_HUMAN          |
| Q9P2E9                                                                                  | 2             | 3.4093           | K.QVLQLQASHR.E              | 4            | RRBP1_HUMAN          |
| Q9P2E9                                                                                  | 2             | 4.4949           | K.KGEPGPPDADGPLYLPYK.T      | 5            | RRBP1_HUMAN          |
| Q9P2E9                                                                                  | 2             | 2.8688           | K.KLQEQLK.A                 | 1            | RRBP1_HUMAN          |
| Q9P2E9                                                                                  | 2             | 5.2276           | K.LQEQLKAEDGSSSK.E          | 4            | RRBP1_HUMAN          |
| Q9P2E9                                                                                  | 3             | 4.8723           | K.LQEQLKAEDGSSSKGEGTSV.-    | 4            | RRBP1_HUMAN          |
| Q9P2E9                                                                                  | 2             | 3.115            | K.LQSSEAEVR.S               | 4            | RRBP1_HUMAN          |



| <i>Accession No*</i> | <i>Charge</i> | <i>XC(Max)**</i> | <i>Peptide*</i>                  | <i>TC***</i> | <i>Reference No*</i> |
|----------------------|---------------|------------------|----------------------------------|--------------|----------------------|
| Q9P2E9               | 3             | 4.2068           | K.LRELNKEMAAEK.A                 | 1            | RRBP1_HUMAN          |
| Q9P2E9               | 2             | 3.4767           | K.RLDEVS.R.E                     | 3            | RRBP1_HUMAN          |
| Q9P2E9               | 2             | 3.7553           | K.SVEEEEQVWR.A                   | 5            | RRBP1_HUMAN          |
| Q9P2E9               | 3             | 4.8214           | K.SEAQKQSDDELALVR.Q              | 3            | RRBP1_HUMAN          |
| Q9P2E9               | 2             | 5.8657           | K.ADSVANQGTKVEGITNQGK.K          | 5            | RRBP1_HUMAN          |
| Q9P2E9               | 3             | 4.9646           | K.KGEGAPIQGK.K.A                 | 4            | RRBP1_HUMAN          |
| Q9P2E9               | 2             | 5.8066           | K.LREAEETQSTLQAECdqYR.S          | 3            | RRBP1_HUMAN          |
| Q9P2E9               | 2             | 3.621            | K.EAIELREAVEQQK.V                | 1            | RRBP1_HUMAN          |
| Q9P2E9               | 3             | 4.8767           | K.SHVEDGDIAGAPASSPEAPAEQDPVQLK.T | 2            | RRBP1_HUMAN          |
| Q9P2E9               | 2             | 4.6947           | K.AEDGSSSKEGTSV.-                | 10           | RRBP1_HUMAN          |
| Q9P2E9               | 3             | 4.1348           | K.AEGAQNQGQKGEQAQNQGK.K.T        | 2            | RRBP1_HUMAN          |
| Q9P2E9               | 2             | 3.009            | K.AGIIQDTPWHK.A                  | 2            | RRBP1_HUMAN          |
| Q9P2E9               | 2             | 4.0884           | K.AM#EALATAEQACK.E               | 2            | RRBP1_HUMAN          |
| Q9P2E9               | 2             | 4.8176           | K.AMEALATAEQACK.E                | 5            | RRBP1_HUMAN          |
| Q9P2E9               | 2             | 4.9097           | K.AQEQQQQMAELHSK.L               | 5            | RRBP1_HUMAN          |
| Q9P2E9               | 3             | 4.9002           | K.AEGAQNQGQKGEQAQNQGK.K          | 2            | RRBP1_HUMAN          |
| Q9P2E9               | 3             | 4.1534           | K.ATQKGDVPAILKR.Q                | 1            | RRBP1_HUMAN          |
| Q9P2E9               | 2             | 3.7446           | K.KGEGAPIQGK.K                   | 9            | RRBP1_HUMAN          |
| Q9P2E9               | 2             | 2.7969           | K.GDPVAILKR.Q                    | 1            | RRBP1_HUMAN          |
| Q9P2E9               | 1             | 2.2766           | K.GEGAPIQGK.K                    | 1            | RRBP1_HUMAN          |
| Q9P2E9               | 2             | 2.773            | K.GEPGPPDADGPLYLPYK.T            | 1            | RRBP1_HUMAN          |
| Q9P2E9               | 4             | 5.4076           | K.HLEEIVEKLGEESSDQVR.E           | 1            | RRBP1_HUMAN          |
| Q9P2E9               | 2             | 2.8972           | K.HPPAPAEPSSDLASK.L              | 1            | RRBP1_HUMAN          |
| Q9P2E9               | 3             | 4.2515           | K.IRTLQEQLNGPNTQLAR.L            | 1            | RRBP1_HUMAN          |
| Q9P2E9               | 3             | 5.5276           | K.KADSVANQGTKVEGITNQGK.K         | 3            | RRBP1_HUMAN          |
| Q9P2E9               | 3             | 7.0508           | K.KAEGAQNQGQKGEQAQNQGK.K         | 11           | RRBP1_HUMAN          |
| Q9P2E9               | 2             | 3.1332           | K.ATQKGDVPAILKR.R                | 2            | RRBP1_HUMAN          |
| Q9P2E9               | 2             | 4.15             | R.SIEALLEAGQAR.D                 | 5            | RRBP1_HUMAN          |
| Q9P2E9               | 2             | 3.1278           | R.LIEILSEK.A                     | 1            | RRBP1_HUMAN          |
| Q9P2E9               | 2             | 3.1649           | K.SEAVRQDEQQR.K                  | 3            | RRBP1_HUMAN          |
| Q9P2E9               | 3             | 5.9689           | R.LQQENSILRDALNQATSQVESK.Q       | 3            | RRBP1_HUMAN          |
| Q9P2E9               | 2             | 3.5477           | R.NTDVAQSPEAPK.Q                 | 2            | RRBP1_HUMAN          |
| Q9P2E9               | 2             | 5.61             | R.NTDVAQSPEAPKQEAPAK.K           | 8            | RRBP1_HUMAN          |
| Q9P2E9               | 3             | 4.1279           | R.QKLTAEFEEAQTSAQR.L             | 1            | RRBP1_HUMAN          |
| Q9P2E9               | 2             | 3.0203           | R.EQEITAVQAR.M                   | 2            | RRBP1_HUMAN          |
| Q9P2E9               | 3             | 4.4082           | R.QLLLESQSQLDAAKSEAQK.Q          | 2            | RRBP1_HUMAN          |

| <i>Accession No*</i>                                                | <i>Charge</i> | <i>XC(Max)**</i> | <i>Peptide*</i>          | <i>TC***</i> | <i>Reference No*</i> |
|---------------------------------------------------------------------|---------------|------------------|--------------------------|--------------|----------------------|
| Q9P2E9                                                              | 1             | 2.6921           | R.ESEELQK.R              | 4            | RRBP1_HUMAN          |
| Q9P2E9                                                              | 2             | 3.1711           | R.SILAETEGM#LR.D         | 1            | RRBP1_HUMAN          |
| Q9P2E9                                                              | 2             | 4.2053           | R.SILAETEGMLR.D          | 8            | RRBP1_HUMAN          |
| Q9P2E9                                                              | 2             | 4.8326           | R.SILAETEGMLRDLQK.S      | 2            | RRBP1_HUMAN          |
| Q9P2E9                                                              | 3             | 4.3331           | R.SKCEELSGLHGQLQEAR.A    | 2            | RRBP1_HUMAN          |
| Q9P2E9                                                              | 2             | 4.9255           | R.TAGPLESSETEEASQLKER.L  | 6            | RRBP1_HUMAN          |
| Q9P2E9                                                              | 2             | 5.3428           | R.TLQEQLENGPNQLAR.L      | 3            | RRBP1_HUMAN          |
| Q9P2E9                                                              | 2             | 4.253            | R.QLLLESQSQLDAAK.S       | 1            | RRBP1_HUMAN          |
| Q9P2E9                                                              | 2             | 4.0812           | K.VGAAEEELQK.S           | 7            | RRBP1_HUMAN          |
| Q9P2E9                                                              | 2             | 2.976            | K.TESASVQGR.N            | 3            | RRBP1_HUMAN          |
| Q9P2E9                                                              | 3             | 5.7604           | K.TLVSTVGSMS#VFNEGEAQR.L | 1            | RRBP1_HUMAN          |
| Q9P2E9                                                              | 3             | 6.6944           | K.TLVSTVGSMSVFNEGEAQR.L  | 12           | RRBP1_HUMAN          |
| Q9P2E9                                                              | 3             | 5.2303           | K.TQLEWTEAILEDQEQTQR.Q   | 6            | RRBP1_HUMAN          |
| Q9P2E9                                                              | 2             | 4.8454           | R.LKELESQVSGLEK.E        | 3            | RRBP1_HUMAN          |
| Q9P2E9                                                              | 2             | 2.8938           | K.VEGITNQGK.K            | 1            | RRBP1_HUMAN          |
| Q9P2E9                                                              | 2             | 3.0709           | R.ELNKEMAAEK.A           | 3            | RRBP1_HUMAN          |
| Q9P2E9                                                              | 3             | 6.1335           | R.ADAEKAQEQQQM#AELHSK.L  | 2            | RRBP1_HUMAN          |
| Q9P2E9                                                              | 2             | 6.2753           | R.ADAEKAQEQQQMAELHSK.L   | 4            | RRBP1_HUMAN          |
| Q9P2E9                                                              | 2             | 3.1755           | R.AENSQLTER.I            | 3            | RRBP1_HUMAN          |
| Q9P2E9                                                              | 2             | 4.9917           | R.AKVGAEEELQK.S          | 8            | RRBP1_HUMAN          |
| Q9P2E9                                                              | 2             | 4.5325           | R.DALNQATSQVESK.Q        | 4            | RRBP1_HUMAN          |
| Q9P2E9                                                              | 2             | 5.6586           | R.DAQDVQASQAEADQQQTR.L   | 12           | RRBP1_HUMAN          |
| Q9P2E9                                                              | 3             | 4.1742           | R.EAEETQSTLQAECQYR.S     | 2            | RRBP1_HUMAN          |
| Q9P2E9                                                              | 2             | 4.0864           | R.EHVKEVQQLQGK.I         | 5            | RRBP1_HUMAN          |
| Q9P2E9                                                              | 1             | 2.8763           | K.TTQEQLAR.E             | 3            | RRBP1_HUMAN          |
| <b><i>Ribulose-phosphate 3-epimerase - Homo sapiens (Human)</i></b> |               |                  |                          |              |                      |
| Q96AT9                                                              | 2             | 3.6845           | K.IGPSILNSDLANLGAECLR.M  | 2            | RPE_HUMAN            |
| <b><i>RING finger protein 10 - Homo sapiens (Human)</i></b>         |               |                  |                          |              |                      |
| Q8N5U6                                                              | 2             | 3.0275           | R.SASAGPAGESKPK.S        | 2            | RNF10_HUMAN          |
| <b><i>RING finger protein 113A - Homo sapiens (Human)</i></b>       |               |                  |                          |              |                      |
| O15541                                                              | 2             | 3.1139           | K.AVDQVCTFLFK.K          | 1            | R113A_HUMAN          |
| <b><i>RING finger protein 214 - Homo sapiens (Human)</i></b>        |               |                  |                          |              |                      |
| Q8ND24                                                              | 2             | 3.4142           | R.VDQDDDQDSSSLK.L        | 2            | RN214_HUMAN          |
| <b><i>RING finger protein C13orf7 - Homo sapiens (Human)</i></b>    |               |                  |                          |              |                      |
| Q5W0B1                                                              | 2             | 2.8665           | K.EYEDEIDC*LQKEVEELK.S   | 1            | CM007_HUMAN          |

| <i>Accession No*</i>                                                                | <i>Charge</i> | <i>XC(Max)**</i> | <i>Peptide*</i>                | <i>TC***</i> | <i>Reference No*</i> |
|-------------------------------------------------------------------------------------|---------------|------------------|--------------------------------|--------------|----------------------|
| <b><i>RING finger protein C14orf4 - Homo sapiens (Human)</i></b>                    |               |                  |                                |              |                      |
| Q9H1B7                                                                              | 2             | 3.3521           | K.DGSSVHSTTASAR.R              | 1            | CN004_HUMAN          |
| <b><i>RING1 and YY1-binding protein - Homo sapiens (Human)</i></b>                  |               |                  |                                |              |                      |
| Q8N488                                                                              | 3             | 3.707            | K.DKEISPSVTKK.N                | 1            | RYBP_HUMAN           |
| Q8N488                                                                              | 3             | 5.0456           | K.SDILKDPPEANSIQSANATTK.T      | 1            | RYBP_HUMAN           |
| Q8N488                                                                              | 3             | 3.9134           | R.INSQLVAQQVAQQYATPPPKK.E      | 1            | RYBP_HUMAN           |
| Q8N488                                                                              | 3             | 4.5116           | R.SSSTSSTVTSSAGSEQNQSSSGSESTDK | 1            | RYBP_HUMAN           |
| <b><i>RNA 3'-terminal phosphate cyclase-like protein - Homo sapiens (Human)</i></b> |               |                  |                                |              |                      |
| Q9Y2P8                                                                              | 2             | 2.8738           | K.QFGIDGESFELK.I               | 1            | RCL1_HUMAN           |
| <b><i>RNA polymerase II-associated protein 1 - Homo sapiens (Human)</i></b>         |               |                  |                                |              |                      |
| Q9BWH6                                                                              | 2             | 3.2179           | R.LLAQLDPSLVAFLR.S             | 1            | RPAP1_HUMAN          |
| <b><i>RNA polymerase-associated protein LEO1 - Homo sapiens (Human)</i></b>         |               |                  |                                |              |                      |
| Q8WVC0                                                                              | 2             | 3.6821           | K.LTSDEEGEPSGK.R               | 4            | LEO1_HUMAN           |
| Q8WVC0                                                                              | 2             | 3.4493           | R.TEMIKKEER.L                  | 1            | LEO1_HUMAN           |
| Q8WVC0                                                                              | 3             | 4.1148           | R.RDEEGNEIKESNAR.I             | 2            | LEO1_HUMAN           |
| Q8WVC0                                                                              | 3             | 4.2632           | R.IEVEIPKVNTDLGNDLYFVK.L       | 1            | LEO1_HUMAN           |
| Q8WVC0                                                                              | 2             | 4.1491           | K.VNTDLGNDLYFVK.L              | 3            | LEO1_HUMAN           |
| Q8WVC0                                                                              | 3             | 4.3518           | K.KLTSDEEGEPSGKR.K             | 2            | LEO1_HUMAN           |
| Q8WVC0                                                                              | 2             | 4.5798           | R.DEEGNEIKESNAR.I              | 2            | LEO1_HUMAN           |
| <b><i>RNA polymerase-associated protein RTF1 homolog - Homo sapiens (Human)</i></b> |               |                  |                                |              |                      |
| Q92541                                                                              | 2             | 2.7205           | K.YGSGVLPDAPK.E                | 1            | RTF1_HUMAN           |
| <b><i>RNA U small nuclear RNA export adapter protein - Homo sapiens (Human)</i></b> |               |                  |                                |              |                      |
| Q9H814                                                                              | 2             | 2.7175           | R.QSETYNYLLAK.K                | 1            | RNUXA_HUMAN          |
| Q9H814                                                                              | 2             | 4.4398           | R.TPGGVFLNLLK.N                | 4            | RNUXA_HUMAN          |
| <b><i>RNA-binding motif protein, X-linked 2 - Homo sapiens (Human)</i></b>          |               |                  |                                |              |                      |
| Q9Y388                                                                              | 2             | 2.7159           | R.TAYSGGAEDLER.E               | 1            | RBMX2_HUMAN          |
| <b><i>RNA-binding protein 14 - Homo sapiens (Human)</i></b>                         |               |                  |                                |              |                      |
| Q96PK6                                                                              | 2             | 3.7099           | R.LSESQLSFR.R                  | 5            | RBM14_HUMAN          |
| Q96PK6                                                                              | 2             | 3.1429           | R.RLPDAHSDYAR.Y                | 1            | RBM14_HUMAN          |
| Q96PK6                                                                              | 2             | 2.7793           | R.YSGSYNDYLR.A                 | 1            | RBM14_HUMAN          |
| <b><i>RNA-binding protein 26 - Homo sapiens (Human)</i></b>                         |               |                  |                                |              |                      |
| Q5T8P6                                                                              | 3             | 5.0806           | K.TRAEAEAAAVHGAR.F             | 3            | RBM26_HUMAN          |
| Q5T8P6                                                                              | 2             | 3.6002           | R.AEAEAAAVHGAR.F               | 2            | RBM26_HUMAN          |
| <b><i>RNA-binding protein 27 - Homo sapiens (Human)</i></b>                         |               |                  |                                |              |                      |
| Q9P2N5                                                                              | 2             | 3.2744           | K.LSQLQVEAAR.L                 | 1            | RBM27_HUMAN          |

| <i>Accession No*</i>                                                               | <i>Charge</i> | <i>XC(Max)**</i> | <i>Peptide*</i>             | <i>TC***</i> | <i>Reference No*</i> |
|------------------------------------------------------------------------------------|---------------|------------------|-----------------------------|--------------|----------------------|
| Q9P2N5                                                                             | 2             | 3.1865           | K.TSSAVSTPSK.V              | 1            | RBM27_HUMAN          |
| Q9P2N5                                                                             | 2             | 3.3019           | R.DQPGTSAVPNLASVGTR.L       | 2            | RBM27_HUMAN          |
| Q9P2N5                                                                             | 2             | 2.7802           | R.LQLGTPPPLLAAR.L           | 1            | RBM27_HUMAN          |
| <b><i>RNA-binding protein 28 - Homo sapiens (Human)</i></b>                        |               |                  |                             |              |                      |
| Q9NW13                                                                             | 2             | 3.1812           | R.FNQLVEQYK.Q               | 2            | RBM28_HUMAN          |
| <b><i>RNA-binding protein 35B - Homo sapiens (Human)</i></b>                       |               |                  |                             |              |                      |
| Q9H6T0                                                                             | 2             | 2.8653           | R.PTGDFAFALFAC*EELAQAALRR.H | 1            | RB35B_HUMAN          |
| <b><i>RNA-binding protein 8A - Homo sapiens (Human)</i></b>                        |               |                  |                             |              |                      |
| Q9Y5S9                                                                             | 3             | 5.5181           | R.MREDYDSVEQDGDDEPGPQR.S    | 12           | RBM8A_HUMAN          |
| Q9Y5S9                                                                             | 2             | 5.1125           | R.M#REDYDSVEQDGDDEPGPQR.S   | 6            | RBM8A_HUMAN          |
| Q9Y5S9                                                                             | 2             | 3.7555           | R.EDYDSVEQDGDDEPGPQR.S      | 3            | RBM8A_HUMAN          |
| Q9Y5S9                                                                             | 2             | 2.7379           | K.NIHLNLDLRR.T              | 1            | RBM8A_HUMAN          |
| Q9Y5S9                                                                             | 2             | 3.2181           | K.GRFGFSEEGSR.A             | 2            | RBM8A_HUMAN          |
| Q9Y5S9                                                                             | 2             | 3.4034           | K.GYTLVEYETYK.E             | 1            | RBM8A_HUMAN          |
| <b><i>RNA-binding protein MEX3C - Homo sapiens (Human)</i></b>                     |               |                  |                             |              |                      |
| Q5U5Q3                                                                             | 2             | 3.7741           | R.APAAAAQGGAR.R             | 1            | MEX3C_HUMAN          |
| <b><i>RNA-binding protein NOB1 - Homo sapiens (Human)</i></b>                      |               |                  |                             |              |                      |
| Q9ULX3                                                                             | 2             | 2.8065           | R.RLNPNASR.K                | 1            | NOB1_HUMAN           |
| <b><i>RNA-binding protein with multiple splicing - Homo sapiens (Human)</i></b>    |               |                  |                             |              |                      |
| Q93062                                                                             | 2             | 3.3412           | R.TLFVSGPLPLDIKPR.E         | 1            | RBPMS_HUMAN          |
| Q93062                                                                             | 3             | 4.4772           | K.NKLVGTPNPSTPLPNTVPQFIAR.E | 2            | RBPMS_HUMAN          |
| Q93062                                                                             | 3             | 4.0019           | K.NALNGIRFDPEIPQTLR.L       | 1            | RBPMS_HUMAN          |
| <b><i>RNA-binding protein with serine-rich domain 1 - Homo sapiens (Human)</i></b> |               |                  |                             |              |                      |
| Q15287                                                                             | 3             | 4.2261           | R.NVTKDHIMEIFSTYGK.I        | 2            | RNPS1_HUMAN          |
| Q15287                                                                             | 2             | 4.3374           | K.GYAYVEFENPDEAEK.A         | 2            | RNPS1_HUMAN          |
| <b><i>Round spermatid basic protein 1. - Homo sapiens (Human)</i></b>              |               |                  |                             |              |                      |
| Q5VWQ0                                                                             | 2             | 3.9406           | R.AVAAQEEPDKEGK.E           | 2            | Q5VWQ0_HUMA          |
| <b><i>RPL14 protein - Homo sapiens (Human)</i></b>                                 |               |                  |                             |              |                      |
| Q6IPH7                                                                             | 2             | 6.313            | K.GTAAAAAAAAAAAAAAK.V       | 7            | Q6IPH7_HUMAN         |
| <b><i>RRP15-like protein - Homo sapiens (Human)</i></b>                            |               |                  |                             |              |                      |
| Q9Y3B9                                                                             | 2             | 2.7208           | K.KDFISVLR.G                | 1            | RRP15_HUMAN          |
| Q9Y3B9                                                                             | 2             | 3.1051           | K.SEEGPGWTILR.D             | 2            | RRP15_HUMAN          |
| Q9Y3B9                                                                             | 2             | 3.7725           | R.GM#DGSTNETASSR.K          | 6            | RRP15_HUMAN          |
| Q9Y3B9                                                                             | 2             | 4.0858           | R.GMDGSTNETASSR.K           | 4            | RRP15_HUMAN          |
| <b><i>RRP1-like protein - Homo sapiens (Human)</i></b>                             |               |                  |                             |              |                      |

| <i>Accession No*</i>                                                               | <i>Charge</i> | <i>XC(Max)**</i> | <i>Peptide*</i>                   | <i>TC***</i> | <i>Reference No*</i> |
|------------------------------------------------------------------------------------|---------------|------------------|-----------------------------------|--------------|----------------------|
| P56182                                                                             | 2             | 3.0773           | K.AANVQEPEKK.K                    | 2            | RRP1_HUMAN           |
| P56182                                                                             | 2             | 4.5761           | R.AEAGEQPGETAER.A                 | 4            | RRP1_HUMAN           |
| <b><i>RRP1-like protein B - Homo sapiens (Human)</i></b>                           |               |                  |                                   |              |                      |
| Q14684                                                                             | 2             | 3.3454           | K.TPTSSPASSPLVAK.K                | 1            | RRP1B_HUMAN          |
| <b><i>RUN and FYVE domain-containing protein 1 - Homo sapiens (Human)</i></b>      |               |                  |                                   |              |                      |
| Q96T51                                                                             | 3             | 5.3577           | R.GRELEPELEPGPGPSALEPGEEFEIVDR.S  | 2            | RUFY1_HUMAN          |
| <b><i>RUN and FYVE domain-containing protein 4 - Homo sapiens (Human)</i></b>      |               |                  |                                   |              |                      |
| Q6ZNE9                                                                             | 2             | 2.709            | R.APWIEIFLGNSTPSTQGGK.G           | 1            | RUFY4_HUMAN          |
| <b><i>RUN domain-containing protein 2A - Homo sapiens (Human)</i></b>              |               |                  |                                   |              |                      |
| Q9HA26                                                                             | 2             | 4.0181           | K.TPGAGESSEDNSDR.S                | 2            | RUN2A_HUMAN          |
| <b><i>RWD domain-containing protein 1 - Homo sapiens (Human)</i></b>               |               |                  |                                   |              |                      |
| Q9H446                                                                             | 2             | 4.1995           | K.AKFDAELLEIK.K                   | 4            | RWDD1_HUMAN          |
| Q9H446                                                                             | 3             | 4.0123           | K.AKFDAELLEIKK.K                  | 4            | RWDD1_HUMAN          |
| Q9H446                                                                             | 3             | 4.3179           | K.QLFHGTPVTIENFLNWK.A             | 3            | RWDD1_HUMAN          |
| Q9H446                                                                             | 2             | 3.0725           | K.RMKEEEEQAGK.N                   | 1            | RWDD1_HUMAN          |
| <b><i>RWD domain-containing protein 4A - Homo sapiens (Human)</i></b>              |               |                  |                                   |              |                      |
| Q6NW29                                                                             | 2             | 3.0674           | R.GWNWVDVVK.H                     | 1            | RWDD4_HUMAN          |
| <b><i>SAM and SH3 domain-containing protein 1 - Homo sapiens (Human)</i></b>       |               |                  |                                   |              |                      |
| O94885                                                                             | 2             | 3.5768           | R.NQLGNYPTLPLMK.S                 | 2            | SASH1_HUMAN          |
| <b><i>SAM domain and HD domain-containing protein 1 - Homo sapiens (Human)</i></b> |               |                  |                                   |              |                      |
| Q9Y3Z3                                                                             | 3             | 4.3931           | R.NFTKPDGDVIAPLITPQKK.E           | 2            | SAMH1_HUMAN          |
| Q9Y3Z3                                                                             | 2             | 2.8142           | R.GGFEEPVLK.N                     | 1            | SAMH1_HUMAN          |
| <b><i>SAM domain-containing protein SAMSN-1 - Homo sapiens (Human)</i></b>         |               |                  |                                   |              |                      |
| Q9NSI8                                                                             | 2             | 4.3078           | K.TPMGMWTGMLNNK.V                 | 2            | SAMN1_HUMAN          |
| <b><i>SAP30-binding protein - Homo sapiens (Human)</i></b>                         |               |                  |                                   |              |                      |
| Q9UHR5                                                                             | 2             | 4.9212           | K.GGLVSDAYGEDDFSR.L               | 5            | S30BP_HUMAN          |
| Q9UHR5                                                                             | 2             | 3.1674           | K.TTVISAVGTIVKK.A                 | 1            | S30BP_HUMAN          |
| <b><i>SAPK substrate protein 1 - Homo sapiens (Human)</i></b>                      |               |                  |                                   |              |                      |
| Q04323                                                                             | 2             | 4.0277           | R.RQGQELSAAR.Q                    | 4            | SAKS1_HUMAN          |
| Q04323                                                                             | 3             | 3.8098           | K.YGGSVGSQPPVPEPVPSSPSQEPPTK      | 1            | SAKS1_HUMAN          |
| Q04323                                                                             | 2             | 3.293            | R.LPDGTSLTQTFR.A                  | 2            | SAKS1_HUMAN          |
| Q04323                                                                             | 1             | 3.7992           | R.MLELVAQK.Q                      | 5            | SAKS1_HUMAN          |
| <b><i>SAPS domain family member 3 - Homo sapiens (Human)</i></b>                   |               |                  |                                   |              |                      |
| Q5H9R7                                                                             | 4             | 5.6916           | R.IQQFDDGGSDDEEDIWEEKHIAFTPESQR.R | 1            | SAPS3_HUMAN          |
| Q5H9R7                                                                             | 2             | 3.4258           | K.DAECEPETAEAK.C                  | 2            | SAPS3_HUMAN          |

| <i>Accession No*</i>                                                                                         | <i>Charge</i> | <i>XC(Max)**</i> | <i>Peptide*</i>                   | <i>TC***</i> | <i>Reference No*</i> |
|--------------------------------------------------------------------------------------------------------------|---------------|------------------|-----------------------------------|--------------|----------------------|
| Q5H9R7                                                                                                       | 2             | 3.9097           | K.ETGWASFSEFTSSLSTK.D             | 1            | SAPS3_HUMAN          |
| <b><i>SAPS1 protein - Homo sapiens (Human)</i></b>                                                           |               |                  |                                   |              |                      |
| Q2M2H3                                                                                                       | 2             | 3.0882           | R.SQDPTPPSAPQEATEGSK.V            | 1            | Q2M2H3_HUMA          |
| <b><i>Sarcomeric tropomyosin kappa - Homo sapiens (Human)</i></b>                                            |               |                  |                                   |              |                      |
| Q6DV90                                                                                                       | 2             | 4.0273           | K.C*AELEELKTVTNDLK.S              | 1            | Q6DV90_HUMA          |
| <b><i>Sarcoplasmic reticulum histidine-rich calcium-binding protein precursor - Homo sapiens (Human)</i></b> |               |                  |                                   |              |                      |
| P23327                                                                                                       | 3             | 4.2824           | K.VGDEGVSGEEVFAEHGGQAR.G          | 1            | SRCH_HUMAN           |
| P23327                                                                                                       | 4             | 5.9609           | R.SQDHKVGDEGVSGEEVFAEHGGQAR.G     | 1            | SRCH_HUMAN           |
| <b><i>Scaffold attachment factor B2 - Homo sapiens (Human)</i></b>                                           |               |                  |                                   |              |                      |
| Q14151                                                                                                       | 3             | 5.63             | K.AVKEEGQDPDEIGIELEATSKK.S        | 2            | SAFB2_HUMAN          |
| Q14151                                                                                                       | 2             | 4.0149           | R.NLWVSGLSSTTR.A                  | 4            | SAFB2_HUMAN          |
| Q14151                                                                                                       | 2             | 3.5725           | R.AWQGAMDAGAASR.E                 | 2            | SAFB2_HUMAN          |
| Q14151                                                                                                       | 2             | 3.214            | K.NTLETSSLNFK.V                   | 1            | SAFB2_HUMAN          |
| Q14151                                                                                                       | 3             | 5.7331           | K.AVKEEGQDPDEIGIELEATSK.K         | 2            | SAFB2_HUMAN          |
| Q14151                                                                                                       | 1             | 2.1553           | K.EYVAAQLR.Q                      | 1            | SAFB2_HUMAN          |
| <b><i>Scavenger receptor class F member 2 precursor - Homo sapiens (Human)</i></b>                           |               |                  |                                   |              |                      |
| Q96GP6                                                                                                       | 2             | 3.2161           | K.SAHTVEHGSPR.T                   | 2            | SREC2_HUMAN          |
| Q96GP6                                                                                                       | 3             | 3.9247           | R.GRGPGLLEPTDAGGPPR.S             | 2            | SREC2_HUMAN          |
| Q96GP6                                                                                                       | 2             | 3.5161           | R.SAPEAASMLAAELR.G                | 2            | SREC2_HUMAN          |
| <b><i>Scavenger receptor cysteine-rich type 1 protein M130 precursor - Homo sapiens (Human)</i></b>          |               |                  |                                   |              |                      |
| Q86VB7                                                                                                       | 2             | 3.9655           | K.EAEFGQGTGPIWLNEVK.C             | 2            | C163A_HUMAN          |
| <b><i>SEC16 homolog A - Homo sapiens (Human)</i></b>                                                         |               |                  |                                   |              |                      |
| O15027                                                                                                       | 3             | 4.5608           | K.NEHRPASALVNPLAR.G               | 2            | SC16A_HUMAN          |
| O15027                                                                                                       | 2             | 3.1516           | R.YGPLPGPAVPR.H                   | 3            | SC16A_HUMAN          |
| O15027                                                                                                       | 2             | 4.0158           | R.NPSSAAPVQSR.G                   | 3            | SC16A_HUMAN          |
| O15027                                                                                                       | 3             | 6.4898           | R.LSGSARPQELVGTFIQQEVGKPEDEASGSFF | 2            | SC16A_HUMAN          |
| O15027                                                                                                       | 2             | 3.4744           | R.IVNHWASPELR.Q                   | 1            | SC16A_HUMAN          |
| O15027                                                                                                       | 3             | 5.8407           | R.GSVSQPSTPSPKPTGIFQTSANSSFEVVK.S | 2            | SC16A_HUMAN          |
| O15027                                                                                                       | 2             | 4.2222           | K.QIDSSPVGGETDETTVSQNYR.G         | 3            | SC16A_HUMAN          |
| O15027                                                                                                       | 2             | 3.562            | K.DAQQQPGLER.A                    | 5            | SC16A_HUMAN          |
| O15027                                                                                                       | 2             | 3.4614           | R.GGIGASENLENPPK.M                | 2            | SC16A_HUMAN          |
| <b><i>SEC6-like protein C14orf73 - Homo sapiens (Human)</i></b>                                              |               |                  |                                   |              |                      |
| Q17RC7                                                                                                       | 2             | 3.7228           | K.EAEEPQTPAQGSR.R                 | 2            | CN073_HUMAN          |
| <b><i>Secretory carrier membrane protein 3 - Homo sapiens (Human)</i></b>                                    |               |                  |                                   |              |                      |
| Q4VX17                                                                                                       | 2             | 3.381            | R.QYATLDVYNPFETR.E                | 1            | Q4VX17_HUMAN         |

| <i>Accession No*</i>                                                                    | <i>Charge</i> | <i>XC(Max)**</i> | <i>Peptide*</i>                  | <i>TC***</i> | <i>Reference No*</i> |
|-----------------------------------------------------------------------------------------|---------------|------------------|----------------------------------|--------------|----------------------|
| <b><i>Segment polarity protein dishevelled homolog DVL-2 - Homo sapiens (Human)</i></b> |               |                  |                                  |              |                      |
| O14641                                                                                  | 2             | 4.6548           | R.GGEASGTSDDGGPPPSR.G            | 2            | DVL2_HUMAN           |
| O14641                                                                                  | 3             | 4.9464           | R.VVSWLVSSDNPQPEMAPPVHEPR.A      | 2            | DVL2_HUMAN           |
| <b><i>Selenium-binding protein 1 - Homo sapiens (Human)</i></b>                         |               |                  |                                  |              |                      |
| Q13228                                                                                  | 4             | 5.9362           | K.GGLKLNPNFLVDFGKEPLGPAHAHEL.R.Y | 1            | SBP1_HUMAN           |
| Q13228                                                                                  | 3             | 3.7114           | K.SPQYQCQVIHR.L                  | 1            | SBP1_HUMAN           |
| Q13228                                                                                  | 2             | 4.1082           | R.NTGTEAPDYLATVDVDPK.S           | 3            | SBP1_HUMAN           |
| <b><i>Selenoprotein H - Homo sapiens (Human)</i></b>                                    |               |                  |                                  |              |                      |
| Q8IZQ5                                                                                  | 2             | 2.8012           | K.AEAAVVAVAEK.R                  | 1            | SELH_HUMAN           |
| Q8IZQ5                                                                                  | 3             | 4.6444           | K.FPEPQEVVEELKK.Y                | 1            | SELH_HUMAN           |
| Q8IZQ5                                                                                  | 3             | 4.3506           | R.KAEAAVVAVAEK.R.E               | 2            | SELH_HUMAN           |
| Q8IZQ5                                                                                  | 2             | 4.259            | R.NAAALSQALR.L                   | 4            | SELH_HUMAN           |
| Q8IZQ5                                                                                  | 2             | 3.243            | R.NAAALSQALRLEAPELPVK.V          | 2            | SELH_HUMAN           |
| <b><i>Selenoprotein P precursor - Homo sapiens (Human)</i></b>                          |               |                  |                                  |              |                      |
| P49908                                                                                  | 2             | 3.6825           | R.DM#PASEDLQDLQK.K               | 7            | SEPP1_HUMAN          |
| <b><i>Semaphorin-4D precursor - Homo sapiens (Human)</i></b>                            |               |                  |                                  |              |                      |
| Q92854                                                                                  | 1             | 2.1286           | K.FADSDADGD.-                    | 1            | SEM4D_HUMAN          |
| <b><i>Semaphorin-6B precursor - Homo sapiens (Human)</i></b>                            |               |                  |                                  |              |                      |
| Q9H3T3                                                                                  | 2             | 3.0676           | R.APEQPPAPGEPTDGR.L              | 2            | SEM6B_HUMAN          |
| <b><i>Sentrin-specific protease 6 - Homo sapiens (Human)</i></b>                        |               |                  |                                  |              |                      |
| Q9GZR1                                                                                  | 2             | 4.8118           | K.SGGSAGEITFLEALAR.S             | 2            | SENP6_HUMAN          |
| <b><i>Septin-11 - Homo sapiens (Human)</i></b>                                          |               |                  |                                  |              |                      |
| Q9NVA2                                                                                  | 2             | 4.6059           | K.AAAQLLQSQAQQSGAQQTK.K          | 1            | SEP11_HUMAN          |
| <b><i>Septin-2 - Homo sapiens (Human)</i></b>                                           |               |                  |                                  |              |                      |
| Q15019                                                                                  | 2             | 3.3268           | R.RMQEMIAR.M                     | 2            | SEPT2_HUMAN          |
| <b><i>Septin-5 - Homo sapiens (Human)</i></b>                                           |               |                  |                                  |              |                      |
| Q99719                                                                                  | 2             | 2.7817           | K.LATPEDKQDIDK.Q                 | 1            | SEPT5_HUMAN          |
| <b><i>Septin-7 - Homo sapiens (Human)</i></b>                                           |               |                  |                                  |              |                      |
| Q16181                                                                                  | 2             | 4.2087           | K.LKDSEAEELQR.R                  | 4            | SEPT7_HUMAN          |
| Q16181                                                                                  | 2             | 2.7519           | K.DSEAEELQR.R                    | 1            | SEPT7_HUMAN          |
| <b><i>Septin-9 - Homo sapiens (Human)</i></b>                                           |               |                  |                                  |              |                      |
| Q9UHD8                                                                                  | 2             | 2.7013           | R.SFEVEEVETPNSTPPRR.V            | 1            | SEPT9_HUMAN          |
| Q9UHD8                                                                                  | 2             | 2.9851           | R.SFEVEEVETPNSTPPRR.R            | 1            | SEPT9_HUMAN          |
| Q9UHD8                                                                                  | 2             | 3.1054           | R.LGDSSGPALKR.S                  | 2            | SEPT9_HUMAN          |
| Q9UHD8                                                                                  | 3             | 3.7133           | R.RLGDSSGPALKR.S                 | 1            | SEPT9_HUMAN          |

| <i>Accession No*</i>                                                                     | <i>Charge</i> | <i>XC(Max)**</i> | <i>Peptide*</i>                 | <i>TC***</i> | <i>Reference No*</i> |
|------------------------------------------------------------------------------------------|---------------|------------------|---------------------------------|--------------|----------------------|
| Q9UHD8                                                                                   | 2             | 2.8537           | R.RLGDSSGPALK.R                 | 1            | SEPT9_HUMAN          |
| <b><i>Sequestosome-1 - Homo sapiens (Human)</i></b>                                      |               |                  |                                 |              |                      |
| Q13501                                                                                   | 2             | 3.2365           | R.LTPVSPESSSTEEK.S              | 1            | SQSTM_HUMAN          |
| <b><i>Serine arginine-rich pre-mRNA splicing factor SR-A1 - Homo sapiens (Human)</i></b> |               |                  |                                 |              |                      |
| Q7Z5V7                                                                                   | 2             | 2.7559           | K.DAASAGLGSIGVK.F               | 1            | Q7Z5V7_HUMAN         |
| Q7Z5V7                                                                                   | 3             | 4.8939           | R.AARPPPAASATPTAQPLPQPPAPR.A    | 4            | Q7Z5V7_HUMAN         |
| Q7Z5V7                                                                                   | 3             | 4.3197           | R.FDIYDPFHPTDEAYSPPPAPEQK.Y     | 1            | Q7Z5V7_HUMAN         |
| <b><i>Serine hydroxymethyltransferase, cytosolic - Homo sapiens (Human)</i></b>          |               |                  |                                 |              |                      |
| P34896                                                                                   | 3             | 4.9006           | K.MLAQPLKDSDEVYNIKK.E           | 1            | GLYC_HUMAN           |
| <b><i>Serine/arginine repetitive matrix protein 2 - Homo sapiens (Human)</i></b>         |               |                  |                                 |              |                      |
| Q9UQ35                                                                                   | 2             | 2.9012           | R.TSVPENHAQSR.I                 | 1            | SRRM2_HUMAN          |
| Q9UQ35                                                                                   | 2             | 3.5131           | R.SSTGPEPPAPTPLLAER.H           | 2            | SRRM2_HUMAN          |
| Q9UQ35                                                                                   | 2             | 3.1422           | R.TAAALAPASLTSAR.M              | 2            | SRRM2_HUMAN          |
| Q9UQ35                                                                                   | 2             | 3.5521           | R.TPAAAAAM#NLASPR.T             | 2            | SRRM2_HUMAN          |
| Q9UQ35                                                                                   | 2             | 3.9728           | R.TPAAAAAMNLASPR.T              | 3            | SRRM2_HUMAN          |
| Q9UQ35                                                                                   | 3             | 4.465            | R.TPAALAALSLTGSPTAANYPSSSR.T    | 1            | SRRM2_HUMAN          |
| Q9UQ35                                                                                   | 2             | 3.8946           | R.TPAIPTAVNLADSR.T              | 4            | SRRM2_HUMAN          |
| Q9UQ35                                                                                   | 2             | 2.8156           | R.SAHATAPVNIAGSR.T              | 1            | SRRM2_HUMAN          |
| Q9UQ35                                                                                   | 2             | 3.2952           | R.TPTAPAVNLAGAR.T               | 3            | SRRM2_HUMAN          |
| Q9UQ35                                                                                   | 2             | 3.2515           | R.MAPALSGANLTSR.V               | 4            | SRRM2_HUMAN          |
| Q9UQ35                                                                                   | 2             | 3.6629           | R.TPQAPASANLVGPR.S              | 6            | SRRM2_HUMAN          |
| Q9UQ35                                                                                   | 2             | 3.995            | K.SSTPPGESYFGVSSLQLK.G          | 3            | SRRM2_HUMAN          |
| Q9UQ35                                                                                   | 2             | 2.8929           | R.SPVPSAFSDQSR.C                | 2            | SRRM2_HUMAN          |
| Q9UQ35                                                                                   | 2             | 2.727            | K.AGMSSNQSISSPVLDAVPR.T         | 1            | SRRM2_HUMAN          |
| Q9UQ35                                                                                   | 2             | 2.711            | R.AQSGSDSSPEPK.A                | 1            | SRRM2_HUMAN          |
| Q9UQ35                                                                                   | 2             | 4.9153           | R.FQSDSSSYPTVDSNLLGQSR.L        | 3            | SRRM2_HUMAN          |
| Q9UQ35                                                                                   | 2             | 3.1115           | R.GEFSASPMLK.S                  | 2            | SRRM2_HUMAN          |
| Q9UQ35                                                                                   | 2             | 2.8041           | R.HSLSGSSPGMK.D                 | 1            | SRRM2_HUMAN          |
| Q9UQ35                                                                                   | 2             | 5.2694           | R.IPAASAAAM#NLASAR.T            | 4            | SRRM2_HUMAN          |
| Q9UQ35                                                                                   | 2             | 5.07             | R.IPAASAAAMNLASAR.T             | 2            | SRRM2_HUMAN          |
| Q9UQ35                                                                                   | 2             | 2.7798           | R.LETAESKEK.M                   | 2            | SRRM2_HUMAN          |
| Q9UQ35                                                                                   | 2             | 2.864            | K.AGM#SSNQSISSPVLDAVPR.T        | 1            | SRRM2_HUMAN          |
| <b><i>Serine/threonine protein kinase kkiatre-like 1 - Homo sapiens (Human)</i></b>      |               |                  |                                 |              |                      |
| Q8WXQ5                                                                                   | 2             | 2.8038           | K.IPDPEMDSLCLSVTLTEGGLLASGAVK.R | 1            | Q8WXQ5_HUMA          |
| <b><i>Serine/threonine-protein kinase 3 - Homo sapiens (Human)</i></b>                   |               |                  |                                 |              |                      |



| <i>Accession No*</i>                                                                 | <i>Charge</i> | <i>XC(Max)**</i> | <i>Peptide*</i>                    | <i>TC***</i> | <i>Reference No*</i> |
|--------------------------------------------------------------------------------------|---------------|------------------|------------------------------------|--------------|----------------------|
| Q13188                                                                               | 2             | 3.0904           | K.NLSLEELQM#R.L                    | 1            | STK3_HUMAN           |
| Q13188                                                                               | 2             | 3.2185           | K.NLSLEELQMR.L                     | 2            | STK3_HUMAN           |
| Q13188                                                                               | 3             | 4.0922           | K.VPQDGDGDFLKNLSLEELQMR.L          | 1            | STK3_HUMAN           |
| <b><i>Serine/threonine-protein kinase 32C - Homo sapiens (Human)</i></b>             |               |                  |                                    |              |                      |
| Q86UX6                                                                               | 2             | 2.8399           | R.DAAEPVEDEAER.S                   | 1            | ST32C_HUMAN          |
| <b><i>Serine/threonine-protein kinase 36 - Homo sapiens (Human)</i></b>              |               |                  |                                    |              |                      |
| Q9NRP7                                                                               | 1             | 2.1125           | K.EAALIALR.S                       | 1            | STK36_HUMAN          |
| <b><i>Serine/threonine-protein kinase 4 - Homo sapiens (Human)</i></b>               |               |                  |                                    |              |                      |
| Q13043                                                                               | 2             | 3.0629           | K.RQPILDAIEAK.K                    | 2            | STK4_HUMAN           |
| <b><i>Serine/threonine-protein kinase DCLK2 - Homo sapiens (Human)</i></b>           |               |                  |                                    |              |                      |
| Q8N568                                                                               | 2             | 3.2586           | R.GAPSSSGGSSSSGPK.G                | 3            | DCLK2_HUMAN          |
| <b><i>Serine/threonine-protein kinase Duet - Homo sapiens (Human)</i></b>            |               |                  |                                    |              |                      |
| Q9Y2A5                                                                               | 2             | 2.914            | K.ATAAESSDGSIK.K                   | 1            | DUET_HUMAN           |
| <b><i>Serine/threonine-protein kinase LMTK2 precursor - Homo sapiens (Human)</i></b> |               |                  |                                    |              |                      |
| Q8IWU2                                                                               | 3             | 5.0521           | K.IFDLM#ELNGVQADFKPATLSSSLDNPKE    | 1            | LMTK2_HUMAN          |
| Q8IWU2                                                                               | 2             | 4.6359           | K.NLEAVETLNQLNSK.D                 | 2            | LMTK2_HUMAN          |
| Q8IWU2                                                                               | 3             | 3.7245           | R.SLLKPTAANAPDPLPEDWKK.E           | 1            | LMTK2_HUMAN          |
| Q8IWU2                                                                               | 2             | 3.4455           | R.SQDSPGESEETLR.L                  | 2            | LMTK2_HUMAN          |
| Q8IWU2                                                                               | 3             | 4.8749           | R.SQDSPGESEETLRLTESDSVLADDILASR.V  | 1            | LMTK2_HUMAN          |
| Q8IWU2                                                                               | 2             | 3.5339           | R.TGPELSQLTALR.S                   | 3            | LMTK2_HUMAN          |
| <b><i>Serine/threonine-protein kinase MARK2 - Homo sapiens (Human)</i></b>           |               |                  |                                    |              |                      |
| Q7KZI7                                                                               | 3             | 3.9041           | R.KKTTPTPSTNSVLSTSTNR.S            | 1            | MARK2_HUMAN          |
| Q7KZI7                                                                               | 2             | 6.1953           | R.VPVASPSAHNISSSGGAPDR.T           | 6            | MARK2_HUMAN          |
| Q7KZI7                                                                               | 2             | 3.0302           | K.VPASPLPLGLER.K                   | 2            | MARK2_HUMAN          |
| <b><i>Serine/threonine-protein kinase MRCK beta - Homo sapiens (Human)</i></b>       |               |                  |                                    |              |                      |
| Q9Y5S2                                                                               | 2             | 3.713            | R.SM#SDPDQDFDKEPDSSTK.H            | 2            | MRCKB_HUMAN          |
| Q9Y5S2                                                                               | 2             | 2.9334           | R.SMSDPDQDFDKEPDSSTK.H             | 1            | MRCKB_HUMAN          |
| Q9Y5S2                                                                               | 2             | 5.8241           | R.NKPYISWPSSGGSEPSVTVPLR.S         | 7            | MRCKB_HUMAN          |
| <b><i>Serine/threonine-protein kinase Nek9 - Homo sapiens (Human)</i></b>            |               |                  |                                    |              |                      |
| Q8TD19                                                                               | 3             | 4.1966           | K.ELENAEFIPMPDSPSPLSAAFSESEKDTLPYE | 1            | NEK9_HUMAN           |
| Q8TD19                                                                               | 3             | 3.7786           | K.KLEGGQQVGMHSK.G                  | 1            | NEK9_HUMAN           |
| <b><i>Serine/threonine-protein kinase OSR1 - Homo sapiens (Human)</i></b>            |               |                  |                                    |              |                      |
| O95747                                                                               | 2             | 2.9004           | K.IPISLVLR.L                       | 2            | OSR1_HUMAN           |
| O95747                                                                               | 2             | 5.0645           | K.TAQUALSSGSGSQETK.I               | 6            | OSR1_HUMAN           |
| O95747                                                                               | 2             | 5.6241           | K.TAQUALSSGSGSQETKIPISLVLR.L       | 6            | OSR1_HUMAN           |

| <i>Accession No*</i>                                                                                           | <i>Charge</i> | <i>XC(Max)**</i> | <i>Peptide*</i>              | <i>TC***</i> | <i>Reference No*</i> |
|----------------------------------------------------------------------------------------------------------------|---------------|------------------|------------------------------|--------------|----------------------|
| <b><i>Serine/threonine-protein kinase PAK 1 - Homo sapiens (Human)</i></b>                                     |               |                  |                              |              |                      |
| Q13153                                                                                                         | 3             | 4.3114           | K.DAGTLNHGSKPLPPNPEEK.K      | 4            | PAK1_HUMAN           |
| Q13153                                                                                                         | 2             | 2.9494           | R.NTSTMIGAGSK.D              | 4            | PAK1_HUMAN           |
| Q13153                                                                                                         | 2             | 3.2792           | R.NTSTM#IGAGSK.D             | 2            | PAK1_HUMAN           |
| <b><i>Serine/threonine-protein kinase PAK 4 - Homo sapiens (Human)</i></b>                                     |               |                  |                              |              |                      |
| O96013                                                                                                         | 3             | 3.9989           | K.RVEISAPSNFEHR.V            | 1            | PAK4_HUMAN           |
| O96013                                                                                                         | 2             | 4.1039           | R.ARQENGMPEEPATTAR.G         | 1            | PAK4_HUMAN           |
| O96013                                                                                                         | 3             | 4.6808           | R.DKRPLSGPDVGTQPAGLASGAK.L   | 3            | PAK4_HUMAN           |
| O96013                                                                                                         | 2             | 4.98             | R.FAGHSEAGGGSGDR.R           | 3            | PAK4_HUMAN           |
| O96013                                                                                                         | 2             | 2.9488           | R.QWQSLIEESAR.R              | 2            | PAK4_HUMAN           |
| <b><i>Serine/threonine-protein kinase PRP4 homolog - Homo sapiens (Human)</i></b>                              |               |                  |                              |              |                      |
| Q13523                                                                                                         | 3             | 4.2441           | R.TKLDLALLEDEKQR.A           | 2            | PRP4B_HUMAN          |
| <b><i>Serine/threonine-protein kinase RIO2 - Homo sapiens (Human)</i></b>                                      |               |                  |                              |              |                      |
| Q9BVS4                                                                                                         | 3             | 5.2706           | R.SSGDPEQIKEDSLSEESADAR.S    | 1            | RIOK2_HUMAN          |
| <b><i>Serine/threonine-protein kinase TAO1 - Homo sapiens (Human)</i></b>                                      |               |                  |                              |              |                      |
| Q7L7X3                                                                                                         | 2             | 2.8046           | R.ASDPQSPQVSR.H              | 1            | TAOK1_HUMAN          |
| <b><i>Serine/threonine-protein kinase TAO3 - Homo sapiens (Human)</i></b>                                      |               |                  |                              |              |                      |
| Q9H2K8                                                                                                         | 3             | 3.8828           | R.MGFGNLVTLDFPKEDYR.-        | 1            | TAOK3_HUMAN          |
| <b><i>Serine/threonine-protein kinase tousled-like 2 - Homo sapiens (Human)</i></b>                            |               |                  |                              |              |                      |
| Q86UE8                                                                                                         | 2             | 3.1738           | R.KAEPYETSQGK.G              | 1            | TLK2_HUMAN           |
| <b><i>Serine/threonine-protein kinase WNK1 - Homo sapiens (Human)</i></b>                                      |               |                  |                              |              |                      |
| Q9H4A3                                                                                                         | 3             | 4.2844           | K.EGPVASPPFM#DLEQAVLPAVIPK.K | 1            | WNK1_HUMAN           |
| Q9H4A3                                                                                                         | 2             | 3.7245           | K.EGPVASPPFMDLEQAVLPAVIPK.K  | 2            | WNK1_HUMAN           |
| Q9H4A3                                                                                                         | 2             | 4.8461           | K.LGAAAADAVTGR.T             | 2            | WNK1_HUMAN           |
| <b><i>Serine/threonine-protein phosphatase 1 regulatory subunit 10 - Homo sapiens (Human)</i></b>              |               |                  |                              |              |                      |
| Q96QC0                                                                                                         | 2             | 3.4907           | K.GILQELFLNK.E               | 1            | PP1RA_HUMAN          |
| Q96QC0                                                                                                         | 2             | 4.2854           | R.STGLELETPSLVPVKK.N         | 2            | PP1RA_HUMAN          |
| <b><i>Serine/threonine-protein phosphatase 2A 56 kDa regulatory subunit delta isoform - Homo sapiens (</i></b> |               |                  |                              |              |                      |
| Q14738                                                                                                         | 2             | 3.3434           | K.RAEEFLTASQEAL.-            | 2            | 2A5D_HUMAN           |
| <b><i>Serine/threonine-protein phosphatase 2B catalytic subunit alpha isoform - Homo sapiens (Human)</i></b>   |               |                  |                              |              |                      |
| Q08209                                                                                                         | 2             | 3.7233           | R.DAM#PSDANLNSINK.A          | 5            | PP2BA_HUMAN          |
| <b><i>Serine/threonine-protein phosphatase 5 - Homo sapiens (Human)</i></b>                                    |               |                  |                              |              |                      |
| P53041                                                                                                         | 2             | 3.7022           | R.AALRDYETVVK.V              | 3            | PPP5_HUMAN           |
| P53041                                                                                                         | 1             | 2.7218           | K.TQANDYFK.A                 | 3            | PPP5_HUMAN           |
| P53041                                                                                                         | 3             | 5.3824           | K.FYSQAIELNPSNAIYYGNR.S      | 2            | PPP5_HUMAN           |

| <i>Accession No*</i>                                                              | <i>Charge</i> | <i>XC(Max)**</i> | <i>Peptide*</i>                    | <i>TC***</i> | <i>Reference No*</i> |
|-----------------------------------------------------------------------------------|---------------|------------------|------------------------------------|--------------|----------------------|
| <b><i>Serologically defined colon cancer antigen 1 - Homo sapiens (Human)</i></b> |               |                  |                                    |              |                      |
| O60524                                                                            | 2             | 3.3203           | K.LLGSAGSNKEEK.G                   | 2            | SDCG1_HUMAN          |
| O60524                                                                            | 2             | 2.7641           | K.NVAAVQPM#KR.G                    | 1            | SDCG1_HUMAN          |
| O60524                                                                            | 2             | 3.1851           | K.TALNSFMHSE.E                     | 3            | SDCG1_HUMAN          |
| O60524                                                                            | 2             | 3.3659           | K.VSAPNLLNVK.R                     | 3            | SDCG1_HUMAN          |
| <b><i>Serologically defined colon cancer antigen 8 - Homo sapiens (Human)</i></b> |               |                  |                                    |              |                      |
| Q86SQ7                                                                            | 2             | 4.6012           | K.SPENSTLEEILGQYQR.S               | 2            | SDCG8_HUMAN          |
| <b><i>Serpin H1 precursor - Homo sapiens (Human)</i></b>                          |               |                  |                                    |              |                      |
| P50454                                                                            | 3             | 5.0429           | K.HLAGLGLTEAIDKNK.A                | 2            | SERPH_HUMAN          |
| P50454                                                                            | 2             | 3.4835           | K.GVVEVTHDLQK.H                    | 2            | SERPH_HUMAN          |
| <b><i>SERPINC1 protein - Homo sapiens (Human)</i></b>                             |               |                  |                                    |              |                      |
| Q8TCE1                                                                            | 3             | 4.3561           | K.KATEDEGSEQKIPEATNR.R             | 1            | Q8TCE1_HUMA          |
| Q8TCE1                                                                            | 2             | 4.2096           | K.ATEDEGSEQKIPEATNR.R              | 11           | Q8TCE1_HUMA          |
| Q8TCE1                                                                            | 1             | 2.3169           | K.IPEATNR.R                        | 1            | Q8TCE1_HUMA          |
| <b><i>Serum amyloid A-4 protein precursor - Homo sapiens (Human)</i></b>          |               |                  |                                    |              |                      |
| P35542                                                                            | 2             | 3.0795           | R.GPGGVWAAK.L                      | 2            | SAA4_HUMAN           |
| <b><i>Serum deprivation-response protein - Homo sapiens (Human)</i></b>           |               |                  |                                    |              |                      |
| O95810                                                                            | 3             | 4.7211           | K.VRYEGSYALTSEEAEERSDGDVPVQPAVLQVH | 1            | SDPR_HUMAN           |
| O95810                                                                            | 1             | 2.2567           | K.VSPLTFGR.K                       | 1            | SDPR_HUMAN           |
| O95810                                                                            | 3             | 6.8573           | R.YEGSYALTSEEAEERSDGDVPVQPAVLQVHQT | 7            | SDPR_HUMAN           |
| O95810                                                                            | 2             | 4.5129           | R.YEGSYALTSEEAEER.S                | 2            | SDPR_HUMAN           |
| O95810                                                                            | 1             | 2.883            | K.YQASTSNTVSK.L                    | 2            | SDPR_HUMAN           |
| O95810                                                                            | 3             | 3.7597           | K.VREGESHAENETK.S                  | 2            | SDPR_HUMAN           |
| O95810                                                                            | 1             | 2.2389           | K.GIQNDLTK.L                       | 1            | SDPR_HUMAN           |
| O95810                                                                            | 2             | 4.017            | K.VLIFQEENEIPASVFK.Q               | 6            | SDPR_HUMAN           |
| O95810                                                                            | 1             | 2.2762           | R.QISLEGSVK.G                      | 2            | SDPR_HUMAN           |
| O95810                                                                            | 2             | 3.913            | K.RLENNHAQLLR.R                    | 4            | SDPR_HUMAN           |
| O95810                                                                            | 2             | 4.9938           | K.LVNMLDAVQENQHK.M                 | 2            | SDPR_HUMAN           |
| O95810                                                                            | 2             | 4.8529           | K.VRYEGSYALTSEEAEER.S              | 2            | SDPR_HUMAN           |
| <b><i>Serum response factor binding protein 1 - Homo sapiens (Human)</i></b>      |               |                  |                                    |              |                      |
| Q8NEF9                                                                            | 3             | 4.3436           | K.AVTIANSPSPKPEKDSVVSLESQK.T       | 1            | Q8NEF9_HUMA          |
| Q8NEF9                                                                            | 2             | 2.9192           | R.SLDFPQNEPQIK.N                   | 1            | Q8NEF9_HUMA          |
| <b><i>SET domain-containing protein 3 - Homo sapiens (Human)</i></b>              |               |                  |                                    |              |                      |
| Q86TU7                                                                            | 2             | 3.4846           | R.SENESLNQESKR.A                   | 2            | SETD3_HUMAN          |
| Q86TU7                                                                            | 2             | 3.4611           | K.GSSSDSTAGVKE.-                   | 3            | SETD3_HUMAN          |

| <i>Accession No*</i>                                                                    | <i>Charge</i> | <i>XC(Max)**</i> | <i>Peptide*</i>                   | <i>TC***</i> | <i>Reference No*</i> |
|-----------------------------------------------------------------------------------------|---------------|------------------|-----------------------------------|--------------|----------------------|
| Q86TU7                                                                                  | 2             | 4.6724           | R.AVEDAKGSSSDSTAGVKE.-            | 1            | SETD3_HUMAN          |
| <b><i>Seven transmembrane helix receptor - Homo sapiens (Human)</i></b>                 |               |                  |                                   |              |                      |
| Q8IXE5                                                                                  | 2             | 3.0854           | R.GANQERAEKVK.L                   | 2            | Q8IXE5_HUMAN         |
| <b><i>SF3A2 protein - Homo sapiens (Human)</i></b>                                      |               |                  |                                   |              |                      |
| Q05DF2                                                                                  | 2             | 3.7679           | K.TGSGGVASSSESNR.D                | 2            | Q05DF2_HUMA          |
| <b><i>SFRS2-interacting protein - Homo sapiens (Human)</i></b>                          |               |                  |                                   |              |                      |
| Q99590                                                                                  | 2             | 3.4021           | R.KPLSGNSNSSGSESFK.F              | 1            | SFRIP_HUMAN          |
| <b><i>SH2 domain-containing adapter protein B - Homo sapiens (Human)</i></b>            |               |                  |                                   |              |                      |
| Q15464                                                                                  | 3             | 4.9288           | K.DKVTIADDYSDPFDKNDLK.S           | 1            | SHB_HUMAN            |
| <b><i>SH2 domain-containing adapter protein E - Homo sapiens (Human)</i></b>            |               |                  |                                   |              |                      |
| Q5VZ18                                                                                  | 2             | 3.6497           | R.DSLQGLIQAAAGK.G                 | 2            | SHE_HUMAN            |
| <b><i>SH2B adapter protein 3 - Homo sapiens (Human)</i></b>                             |               |                  |                                   |              |                      |
| Q9UQQ2                                                                                  | 2             | 2.8295           | R.DSDYEM#DSSSR.S                  | 1            | SH2B3_HUMAN          |
| <b><i>SH3 and multiple ankyrin repeat domains protein 2 - Homo sapiens (Human)</i></b>  |               |                  |                                   |              |                      |
| Q9UPX8                                                                                  | 2             | 3.9285           | K.ANVISELNSILQQMNR.E              | 3            | SHAN2_HUMAN          |
| Q9UPX8                                                                                  | 3             | 4.3759           | K.AQGPESSPAVPSASSGTAGPGNYVHPLTGR. | 1            | SHAN2_HUMAN          |
| <b><i>SH3 and multiple ankyrin repeat domains protein 3 - Homo sapiens (Human)</i></b>  |               |                  |                                   |              |                      |
| Q9BYB0                                                                                  | 2             | 4.0169           | R.LFSSLGELSSISAQR.S               | 3            | SHAN3_HUMAN          |
| Q9BYB0                                                                                  | 2             | 4.7342           | R.SASDINLKGEAQPAASPGPSLR.S        | 1            | SHAN3_HUMAN          |
| Q9BYB0                                                                                  | 3             | 4.177            | R.SRSPSPSPASPASGPGGAPGPR.R        | 1            | SHAN3_HUMAN          |
| Q9BYB0                                                                                  | 3             | 3.9137           | R.LGAGAAGLYEPGAALGPLPYPER.Q       | 1            | SHAN3_HUMAN          |
| Q9BYB0                                                                                  | 2             | 3.7302           | R.GSLASPAFSPR.S                   | 4            | SHAN3_HUMAN          |
| Q9BYB0                                                                                  | 3             | 6.8728           | R.GPRPGGLDYGAGDGPGLAFGGGPAK.D     | 2            | SHAN3_HUMAN          |
| Q9BYB0                                                                                  | 2             | 2.8219           | K.QLQVEDAQER.A                    | 1            | SHAN3_HUMAN          |
| Q9BYB0                                                                                  | 2             | 4.4621           | R.AALAVGSPGPGGGSFAR.E             | 3            | SHAN3_HUMAN          |
| Q9BYB0                                                                                  | 2             | 4.1057           | R.ITPAEISSLFER.Q                  | 2            | SHAN3_HUMAN          |
| <b><i>SH3 and PX domain containing 3 - Homo sapiens (Human)</i></b>                     |               |                  |                                   |              |                      |
| Q8WV41                                                                                  | 2             | 3.9558           | R.GETGLFPASYVEIVR.S               | 4            | Q8WV41_HUMA          |
| Q8WV41                                                                                  | 3             | 6.743            | R.SGISTNHADYSSSPAGSPGAQVSLYNPSVA  | 4            | Q8WV41_HUMA          |
| <b><i>SH3 and PX domain-containing protein 2A - Homo sapiens (Human)</i></b>            |               |                  |                                   |              |                      |
| Q5TCZ1                                                                                  | 2             | 2.8726           | K.EAEEGPTGASESQDSPR.K             | 1            | SPD2A_HUMAN          |
| Q5TCZ1                                                                                  | 2             | 3.082            | R.AASQGSDSPLLPAQR.N               | 1            | SPD2A_HUMAN          |
| <b><i>SH3 domain GRB2-like protein B1 - Homo sapiens (Human)</i></b>                    |               |                  |                                   |              |                      |
| Q9Y371                                                                                  | 2             | 4.2013           | K.GKVPITYLELLN.-                  | 8            | SHLB1_HUMAN          |
| <b><i>SH3 domain-binding glutamic acid-rich-like protein - Homo sapiens (Human)</i></b> |               |                  |                                   |              |                      |

| <i>Accession No*</i>                                                                | <i>Charge</i> | <i>XC(Max)**</i> | <i>Peptide*</i>                | <i>TC***</i> | <i>Reference No*</i> |
|-------------------------------------------------------------------------------------|---------------|------------------|--------------------------------|--------------|----------------------|
| O75368                                                                              | 3             | 5.3474           | K.KQQDVLGFLEANK.I              | 4            | SH3L1_HUMAN          |
| O75368                                                                              | 1             | 4.764            | R.VYIASSSGSTAIAK.K             | 11           | SH3L1_HUMAN          |
| O75368                                                                              | 2             | 3.0391           | R.GDYDAFFEAR.E                 | 4            | SH3L1_HUMAN          |
| O75368                                                                              | 3             | 5.6174           | R.ENVPENSRPATGYPLPPQIFNESQYR.G | 5            | SH3L1_HUMAN          |
| O75368                                                                              | 2             | 3.7519           | R.ENNAVYAFLGLTAPPGSK.E         | 5            | SH3L1_HUMAN          |
| O75368                                                                              | 2             | 3.8222           | R.VYIASSSGSTAIAKK.K            | 4            | SH3L1_HUMAN          |
| O75368                                                                              | 3             | 5.0853           | K.KQQDVLGFLEANKIGFEEK.D        | 1            | SH3L1_HUMAN          |
| O75368                                                                              | 3             | 4.7804           | K.IGFEEKDIAANEENRK.W           | 8            | SH3L1_HUMAN          |
| O75368                                                                              | 3             | 5.0746           | K.IGFEEKDIAANEENR.K            | 3            | SH3L1_HUMAN          |
| O75368                                                                              | 2             | 2.8739           | K.EAEVQAKQQA.-                 | 1            | SH3L1_HUMAN          |
| O75368                                                                              | 2             | 3.0498           | K.DIAANEENRK.W                 | 5            | SH3L1_HUMAN          |
| O75368                                                                              | 2             | 3.4418           | K.DIAANEENR.K                  | 3            | SH3L1_HUMAN          |
| O75368                                                                              | 2             | 3.4356           | K.QQDVLGFLEANK.I               | 6            | SH3L1_HUMAN          |
| O75368                                                                              | 3             | 5.8226           | K.KKQQDVLGFLEANK.I             | 6            | SH3L1_HUMAN          |
| <b><i>SH3 domain-binding protein 1 - Homo sapiens (Human)</i></b>                   |               |                  |                                |              |                      |
| Q9Y3L3                                                                              | 2             | 2.7971           | R.RLVGSSLR.A                   | 1            | 3BP1_HUMAN           |
| <b><i>SH3 domain-containing RING finger protein 1 - Homo sapiens (Human)</i></b>    |               |                  |                                |              |                      |
| Q7Z6J0                                                                              | 2             | 3.2814           | K.DLQSSQGGQQPR.V               | 4            | Q7Z6J0_HUMAN         |
| <b><i>SH3-containing GRB2-like protein 1 - Homo sapiens (Human)</i></b>             |               |                  |                                |              |                      |
| Q99961                                                                              | 3             | 4.335            | K.VGGAEGTKLDDDFKEMEK.K         | 2            | SH3G1_HUMAN          |
| <b><i>Shootin-1 - Homo sapiens (Human)</i></b>                                      |               |                  |                                |              |                      |
| A0MZ66                                                                              | 3             | 4.6804           | R.RKVTAEADSSSPTGILATSESK.S     | 1            | SHOT1_HUMAN          |
| A0MZ66                                                                              | 2             | 4.0344           | K.SLDPENSETELER.I              | 1            | SHOT1_HUMAN          |
| A0MZ66                                                                              | 2             | 3.8183           | K.SM#PVLGSSVSSVTK.T            | 3            | SHOT1_HUMAN          |
| A0MZ66                                                                              | 2             | 4.5619           | K.SMPVLGSSVSSVTK.T             | 2            | SHOT1_HUMAN          |
| A0MZ66                                                                              | 2             | 4.2465           | K.TLEAEFNPSPTPEPGEPR.K         | 3            | SHOT1_HUMAN          |
| A0MZ66                                                                              | 2             | 5.2529           | K.VTAEADSSSPTGILATSESK.S       | 3            | SHOT1_HUMAN          |
| A0MZ66                                                                              | 2             | 6.3417           | R.KVTAEADSSSPTGILATSESK.S      | 3            | SHOT1_HUMAN          |
| <b><i>Sialate O-acetyltransferase precursor - Homo sapiens (Human)</i></b>          |               |                  |                                |              |                      |
| Q9HAT2                                                                              | 2             | 5.1969           | R.FFPFGLVQLSSDLK.K             | 2            | SIAE_HUMAN           |
| <b><i>Sialic acid-binding Ig-like lectin 9 precursor - Homo sapiens (Human)</i></b> |               |                  |                                |              |                      |
| Q9Y336                                                                              | 2             | 3.6519           | R.EGANTDQDAPVATNNPAR.A         | 1            | SIGL9_HUMAN          |
| <b><i>Sickle tail protein homolog - Homo sapiens (Human)</i></b>                    |               |                  |                                |              |                      |
| Q5T5P2                                                                              | 2             | 3.4237           | K.QLENTISEMSPK.A               | 3            | SKT_HUMAN            |
| Q5T5P2                                                                              | 2             | 3.7721           | R.TLDSLEQTIK.Q                 | 2            | SKT_HUMAN            |

| <i>Accession No*</i>                                                                    | <i>Charge</i> | <i>XC(Max)**</i> | <i>Peptide*</i>                | <i>TC***</i> | <i>Reference No*</i> |
|-----------------------------------------------------------------------------------------|---------------|------------------|--------------------------------|--------------|----------------------|
| Q5T5P2                                                                                  | 2             | 5.4868           | R.RREQPSIESTSPISR.T            | 3            | SKT_HUMAN            |
| Q5T5P2                                                                                  | 3             | 3.8917           | R.PLLVPDEGPTALEPPTSIPSASR.K    | 1            | SKT_HUMAN            |
| Q5T5P2                                                                                  | 2             | 3.9726           | R.NPGGQEMNRTELNK.F             | 2            | SKT_HUMAN            |
| Q5T5P2                                                                                  | 2             | 3.1341           | R.NPGGQEMNR.T                  | 2            | SKT_HUMAN            |
| Q5T5P2                                                                                  | 2             | 2.7511           | K.RFEIAR.S                     | 1            | SKT_HUMAN            |
| Q5T5P2                                                                                  | 3             | 4.5695           | R.TLDSLEQTIKQLENTISEM#SPK.A    | 1            | SKT_HUMAN            |
| Q5T5P2                                                                                  | 2             | 2.8522           | K.QLAALTQAIR.T                 | 1            | SKT_HUMAN            |
| Q5T5P2                                                                                  | 2             | 3.2759           | K.KQLAALTQAIR.T                | 1            | SKT_HUMAN            |
| Q5T5P2                                                                                  | 3             | 3.8282           | K.KPVIIIFDEPMDIR.S             | 1            | SKT_HUMAN            |
| Q5T5P2                                                                                  | 2             | 2.7583           | K.ENSISNMSLLR.D                | 1            | SKT_HUMAN            |
| Q5T5P2                                                                                  | 2             | 3.6667           | K.ASFGFSGISPLEDEINK.G          | 2            | SKT_HUMAN            |
| Q5T5P2                                                                                  | 3             | 4.2799           | R.KSDVEYENGPQMEFQK.V           | 1            | SKT_HUMAN            |
| <b><i>Sideroflexin-1 - Homo sapiens (Human)</i></b>                                     |               |                  |                                |              |                      |
| Q9H9B4                                                                                  | 2             | 3.2483           | K.SSMSVTSLEAELQAK.I            | 1            | SFXN1_HUMAN          |
| Q9H9B4                                                                                  | 2             | 3.1347           | K.SSM#SVTSLEAELQAK.I           | 1            | SFXN1_HUMAN          |
| <b><i>Signal recognition particle 14 kDa protein - Homo sapiens (Human)</i></b>         |               |                  |                                |              |                      |
| P37108                                                                                  | 2             | 3.1251           | K.EVNKFQMAYSNLLR.A             | 2            | SRP14_HUMAN          |
| P37108                                                                                  | 2             | 2.8976           | K.FQM#AYSNNLLR.A               | 2            | SRP14_HUMAN          |
| P37108                                                                                  | 2             | 3.4166           | K.FQMAYSNLLR.A                 | 2            | SRP14_HUMAN          |
| P37108                                                                                  | 2             | 4.1402           | K.KGTVEGFEPADNK.C              | 3            | SRP14_HUMAN          |
| <b><i>Signal recognition particle 19 kDa protein - Homo sapiens (Human)</i></b>         |               |                  |                                |              |                      |
| P09132                                                                                  | 2             | 4.3765           | K.TGGADQSLQQGEGSKK.G           | 2            | SRP19_HUMAN          |
| P09132                                                                                  | 2             | 3.6318           | K.TGGADQSLQQGEGSK.K            | 1            | SRP19_HUMAN          |
| <b><i>Signal recognition particle 54 kDa protein - Homo sapiens (Human)</i></b>         |               |                  |                                |              |                      |
| P61011                                                                                  | 2             | 2.8853           | R.QFQQGAAGNM#K.G               | 2            | SRP54_HUMAN          |
| <b><i>Signal recognition particle 68 kDa protein - Homo sapiens (Human)</i></b>         |               |                  |                                |              |                      |
| Q9UHB9                                                                                  | 3             | 4.2403           | K.QVPGGGGGGGSGGGGGSGGGGSGGGR.G | 2            | SRP68_HUMAN          |
| <b><i>Signal recognition particle 72 kDa protein - Homo sapiens (Human)</i></b>         |               |                  |                                |              |                      |
| O76094                                                                                  | 2             | 3.8583           | R.HQKPAGAPATK.K                | 4            | SRP72_HUMAN          |
| O76094                                                                                  | 2             | 3.0723           | R.HQKPAGAPATKK.K               | 1            | SRP72_HUMAN          |
| <b><i>Signal recognition particle receptor subunit alpha - Homo sapiens (Human)</i></b> |               |                  |                                |              |                      |
| P08240                                                                                  | 3             | 4.2011           | K.KEGSDGPLATSKPVPAEK.S         | 1            | SRPR_HUMAN           |
| P08240                                                                                  | 1             | 2.1108           | K.SDAPKEKGK.K                  | 1            | SRPR_HUMAN           |
| P08240                                                                                  | 2             | 4.1583           | K.SGLPVGPENGVELSKEELIR.R       | 1            | SRPR_HUMAN           |
| <b><i>Signal recognition particle receptor subunit beta - Homo sapiens (Human)</i></b>  |               |                  |                                |              |                      |

| <i>Accession No*</i>                                                                                  | <i>Charge</i> | <i>XC(Max)**</i> | <i>Peptide*</i>             | <i>TC***</i> | <i>Reference No*</i> |
|-------------------------------------------------------------------------------------------------------|---------------|------------------|-----------------------------|--------------|----------------------|
| Q9Y5M8                                                                                                | 2             | 3.5663           | R.GDVGSADIQDLEK.W           | 1            | SRPRB_HUMAN          |
| <b><i>Signal transducer and activator of transcription 1-alpha/beta - Homo sapiens (Human)</i></b>    |               |                  |                             |              |                      |
| P42224                                                                                                | 2             | 3.6303           | K.ELSAVTFPDIIR.N            | 2            | STAT1_HUMAN          |
| P42224                                                                                                | 2             | 3.5623           | K.VMAAENIPENPLK.Y           | 1            | STAT1_HUMAN          |
| <b><i>Signal transducer and activator of transcription 2 - Homo sapiens (Human)</i></b>               |               |                  |                             |              |                      |
| P52630                                                                                                | 2             | 3.036            | R.HLNTEPMEIFR.N             | 1            | STAT2_HUMAN          |
| P52630                                                                                                | 2             | 3.4178           | R.PSHFYTDGPLMPSDF.-         | 1            | STAT2_HUMAN          |
| <b><i>Signal transducing adapter molecule 2 - Homo sapiens (Human)</i></b>                            |               |                  |                             |              |                      |
| O75886                                                                                                | 2             | 2.8064           | K.VLEALELYNK.L              | 1            | STAM2_HUMAN          |
| <b><i>Signal-induced proliferation-associated 1-like protein 1 - Homo sapiens (Human)</i></b>         |               |                  |                             |              |                      |
| O43166                                                                                                | 2             | 3.7801           | R.LQEESQNASDK.L             | 3            | SI1L1_HUMAN          |
| O43166                                                                                                | 2             | 4.507            | K.LIDLESPTPESQK.S           | 4            | SI1L1_HUMAN          |
| O43166                                                                                                | 2             | 3.367            | K.QGTSGESFFDLLK.G           | 2            | SI1L1_HUMAN          |
| O43166                                                                                                | 2             | 2.9868           | R.FLMPEAYPSSPR.K            | 1            | SI1L1_HUMAN          |
| <b><i>Signal-induced proliferation-associated 1-like protein 3 - Homo sapiens (Human)</i></b>         |               |                  |                             |              |                      |
| O60292                                                                                                | 2             | 3.2514           | K.VVLQSEVASLR.Q             | 2            | SI1L3_HUMAN          |
| <b><i>Signal-induced proliferation-associated protein 1 - Homo sapiens (Human)</i></b>                |               |                  |                             |              |                      |
| Q96FS4                                                                                                | 2             | 3.0256           | R.LQAESESAATR.L             | 1            | SIPA1_HUMAN          |
| Q96FS4                                                                                                | 2             | 4.5057           | R.RLQAESESAATR.L            | 3            | SIPA1_HUMAN          |
| Q96FS4                                                                                                | 2             | 3.7799           | K.SDAEPEPGNLSEK.V           | 2            | SIPA1_HUMAN          |
| <b><i>Signaling threshold-regulating transmembrane adapter 1 precursor - Homo sapiens (Human)</i></b> |               |                  |                             |              |                      |
| Q9Y3P8                                                                                                | 3             | 3.9404           | R.LSQDPEPDQQDPTLGGPAR.A     | 3            | SIT1_HUMAN           |
| <b><i>Single Ig IL-1-related receptor - Homo sapiens (Human)</i></b>                                  |               |                  |                             |              |                      |
| Q6IA17                                                                                                | 2             | 2.9111           | R.ALDSEVDPDPEGDLGVR.G       | 1            | SIGIR_HUMAN          |
| <b><i>Single-stranded DNA-binding protein, mitochondrial precursor - Homo sapiens (Human)</i></b>     |               |                  |                             |              |                      |
| Q04837                                                                                                | 2             | 4.365            | K.NPVTIFSLATNEMWR.S         | 1            | SSB_HUMAN            |
| <b><i>Sister chromatid cohesion protein PDS5 homolog A - Homo sapiens (Human)</i></b>                 |               |                  |                             |              |                      |
| Q29RF7                                                                                                | 3             | 4.3719           | K.TDEKVDGSGPPAPSKPR.R       | 1            | PDS5A_HUMAN          |
| Q29RF7                                                                                                | 2             | 3.9811           | R.STGTETGSNINVNSELNPSTGNR.S | 1            | PDS5A_HUMAN          |
| Q29RF7                                                                                                | 2             | 3.4359           | K.NDDLNKPK.G                | 2            | PDS5A_HUMAN          |
| Q29RF7                                                                                                | 3             | 4.0493           | R.SREQSSEAAETGVSENEENPVR.I  | 2            | PDS5A_HUMAN          |
| Q29RF7                                                                                                | 2             | 3.4046           | R.EQSSEAAETGVSENEENPVR.I    | 1            | PDS5A_HUMAN          |
| <b><i>Sjogren syndrome/scleroderma autoantigen 1 - Homo sapiens (Human)</i></b>                       |               |                  |                             |              |                      |
| O60232                                                                                                | 2             | 3.2808           | R.LMGDYLLR.G                | 2            | SSA27_HUMAN          |
| <b><i>Ski oncogene - Homo sapiens (Human)</i></b>                                                     |               |                  |                             |              |                      |

| <i>Accession No*</i>                                                                                    | <i>Charge</i> | <i>XC(Max)**</i> | <i>Peptide*</i>              | <i>TC***</i> | <i>Reference No*</i> |
|---------------------------------------------------------------------------------------------------------|---------------|------------------|------------------------------|--------------|----------------------|
| P12755                                                                                                  | 2             | 3.8512           | R.ARPEAAGSEGAAELEP.-         | 1            | SKI_HUMAN            |
| <b><i>SLAIN motif family member 2 - Homo sapiens (Human)</i></b>                                        |               |                  |                              |              |                      |
| Q9P270                                                                                                  | 2             | 5.6645           | R.SGAVQGAGSLGPGSPVR.A        | 4            | Q9P270_HUMAN         |
| Q9P270                                                                                                  | 2             | 3.0773           | R.AGASIPSSGAASPR.G           | 1            | Q9P270_HUMAN         |
| Q9P270                                                                                                  | 2             | 3.1521           | R.KLQELVK.K                  | 1            | Q9P270_HUMAN         |
| <b><i>SLAM family member 5 precursor - Homo sapiens (Human)</i></b>                                     |               |                  |                              |              |                      |
| Q9UIB8                                                                                                  | 2             | 2.9              | R.IYDEILQSK.V                | 1            | SLAF5_HUMAN          |
| <b><i>SLIT and NTRK-like protein 3 precursor - Homo sapiens (Human)</i></b>                             |               |                  |                              |              |                      |
| O94933                                                                                                  | 2             | 2.7856           | K.QWIETISSVSVVGDVLC*R.S      | 1            | SLIK3_HUMAN          |
| <b><i>SLIT-ROBO Rho GTPase-activating protein 1 - Homo sapiens (Human)</i></b>                          |               |                  |                              |              |                      |
| Q7Z6B7                                                                                                  | 2             | 4.4974           | K.HAPDVVLDLTLEQVK.N          | 1            | SRGP1_HUMAN          |
| Q7Z6B7                                                                                                  | 2             | 2.7092           | K.TNPTIGPAPPPQGPTDK.S        | 1            | SRGP1_HUMAN          |
| <b><i>SLIT-ROBO Rho GTPase-activating protein 2 - Homo sapiens (Human)</i></b>                          |               |                  |                              |              |                      |
| O75044                                                                                                  | 2             | 3.9011           | K.TNATSPGVNSSTSPQSTDK.S      | 2            | FNBP2_HUMAN          |
| <b><i>Smad nuclear-interacting protein 1 - Homo sapiens (Human)</i></b>                                 |               |                  |                              |              |                      |
| Q8TAD8                                                                                                  | 2             | 3.502            | R.DGDVVLPAVVVK.Q             | 4            | SNIP1_HUMAN          |
| <b><i>Small acidic protein - Homo sapiens (Human)</i></b>                                               |               |                  |                              |              |                      |
| O00193                                                                                                  | 2             | 2.8148           | R.LVIGDHK.S                  | 1            | SMAP_HUMAN           |
| O00193                                                                                                  | 2             | 5.178            | R.SASPDDDLGSSNWEAADLGNEER.K  | 10           | SMAP_HUMAN           |
| O00193                                                                                                  | 3             | 6.0527           | R.TGEEDKKINEELESQYQQSM#DSK.L | 9            | SMAP_HUMAN           |
| O00193                                                                                                  | 2             | 3.2172           | K.INEELESQYQQSM#DSK.L        | 1            | SMAP_HUMAN           |
| O00193                                                                                                  | 2             | 4.6263           | K.INEELESQYQQSMDSK.L         | 3            | SMAP_HUMAN           |
| O00193                                                                                                  | 1             | 2.1873           | R.LMGAGK.K                   | 1            | SMAP_HUMAN           |
| O00193                                                                                                  | 3             | 6.0967           | R.TGEEDKKINEELESQYQQSMDSK.L  | 11           | SMAP_HUMAN           |
| <b><i>Small EDRK-rich factor 2 - Homo sapiens (Human)</i></b>                                           |               |                  |                              |              |                      |
| P84101                                                                                                  | 2             | 3.6354           | R.DDGLSAAAR.K                | 3            | SERF2_HUMAN          |
| P84101                                                                                                  | 2             | 3.599            | R.DSEIM#QQK.Q                | 9            | SERF2_HUMAN          |
| P84101                                                                                                  | 2             | 3.3778           | R.DSEIMQQK.Q                 | 12           | SERF2_HUMAN          |
| <b><i>Small glutamine-rich tetratricopeptide repeat-containing protein A - Homo sapiens (Human)</i></b> |               |                  |                              |              |                      |
| O43765                                                                                                  | 2             | 3.6405           | R.TPPSEEDSAEAER.L            | 1            | SGTA_HUMAN           |
| O43765                                                                                                  | 2             | 3.5426           | R.SRTPSASNDQQE.-             | 2            | SGTA_HUMAN           |
| <b><i>Small nuclear ribonucleoprotein F - Homo sapiens (Human)</i></b>                                  |               |                  |                              |              |                      |
| P62306                                                                                                  | 2             | 3.0286           | R.GVEEEEEEDGEM#RE.-          | 2            | RUXF_HUMAN           |
| P62306                                                                                                  | 2             | 3.2982           | R.GVEEEEEEDGEMRE.-           | 5            | RUXF_HUMAN           |
| <b><i>Small nuclear ribonucleoprotein polypeptide C - Homo sapiens (Human)</i></b>                      |               |                  |                              |              |                      |



| <i>Accession No*</i>                                                                                   | <i>Charge</i> | <i>XC(Max)**</i> | <i>Peptide*</i>              | <i>TC***</i> | <i>Reference No*</i> |
|--------------------------------------------------------------------------------------------------------|---------------|------------------|------------------------------|--------------|----------------------|
| Q5TAL2                                                                                                 | 3             | 4.1974           | -.M#EEQAQSLIDKTTAAFQQGK.I    | 1            | Q5TAL2_HUMAN         |
| <b><i>Small nuclear ribonucleoprotein Sm D2 - Homo sapiens (Human)</i></b>                             |               |                  |                              |              |                      |
| P62316                                                                                                 | 1             | 2.3005           | R.NPLIAGK.-                  | 2            | SMD2_HUMAN           |
| <b><i>Small nuclear ribonucleoprotein Sm D3 - Homo sapiens (Human)</i></b>                             |               |                  |                              |              |                      |
| P62318                                                                                                 | 2             | 3.199            | R.VAQLQVYIR.G                | 2            | SMD3_HUMAN           |
| <b><i>Small ubiquitin-related modifier 1 precursor - Homo sapiens (Human)</i></b>                      |               |                  |                              |              |                      |
| P63165                                                                                                 | 2             | 3.039            | R.IADNHTPK.E                 | 3            | SUMO1_HUMAN          |
| <b><i>Small ubiquitin-related modifier 2 precursor - Homo sapiens (Human)</i></b>                      |               |                  |                              |              |                      |
| P61956                                                                                                 | 2             | 3.3412           | K.EGVKTENNDHINLK.V           | 4            | SUMO2_HUMAN          |
| P61956                                                                                                 | 2             | 3.4024           | K.TENNDHINLK.V               | 5            | SUMO2_HUMAN          |
| <b><i>Small ubiquitin-related modifier 3 precursor - Homo sapiens (Human)</i></b>                      |               |                  |                              |              |                      |
| P55854                                                                                                 | 2             | 3.5713           | K.EGVKTENDHINLK.V            | 4            | SUMO3_HUMAN          |
| P55854                                                                                                 | 2             | 2.7369           | K.TENDHINLK.V                | 1            | SUMO3_HUMAN          |
| <b><i>SNARE-associated protein Snapin - Homo sapiens (Human)</i></b>                                   |               |                  |                              |              |                      |
| O95295                                                                                                 | 2             | 4.4392           | R.AMLDSGIYPPGSPGK.-          | 1            | S25BP_HUMAN          |
| <b><i>SNW domain-containing protein 1 - Homo sapiens (Human)</i></b>                                   |               |                  |                              |              |                      |
| Q13573                                                                                                 | 2             | 3.5815           | K.THVEKEDGEAR.E              | 3            | SNW1_HUMAN           |
| Q13573                                                                                                 | 2             | 2.938            | R.YTPSQQGVAFNSGAK.Q          | 1            | SNW1_HUMAN           |
| <b><i>Solute carrier family 12 member 2 - Homo sapiens (Human)</i></b>                                 |               |                  |                              |              |                      |
| P55011                                                                                                 | 2             | 3.0467           | K.QTPADGEASGESEPAK.G         | 2            | S12A2_HUMAN          |
| P55011                                                                                                 | 2             | 6.2418           | R.AAAAAAAAAAAAAAGAGAGAK.Q    | 4            | S12A2_HUMAN          |
| P55011                                                                                                 | 2             | 2.7307           | R.VELPGTAVPSVPEDAAPASR.D     | 1            | S12A2_HUMAN          |
| <b><i>Solute carrier family 2, facilitated glucose transporter member 1 - Homo sapiens (Human)</i></b> |               |                  |                              |              |                      |
| P11166                                                                                                 | 3             | 3.7186           | R.QGGASQSDKTPEELFHPLGADSQV.- | 1            | GTR1_HUMAN           |
| <b><i>Something about silencing protein 10 - Homo sapiens (Human)</i></b>                              |               |                  |                              |              |                      |
| Q9NQZ2                                                                                                 | 2             | 2.943            | R.YSGELSGIR.A                | 1            | SAS10_HUMAN          |
| <b><i>Son of sevenless homolog 1 - Homo sapiens (Human)</i></b>                                        |               |                  |                              |              |                      |
| Q07889                                                                                                 | 2             | 4.2651           | R.DGPPLLENAHSS.-             | 4            | SOS1_HUMAN           |
| <b><i>Son of sevenless homolog 2 - Homo sapiens (Human)</i></b>                                        |               |                  |                              |              |                      |
| Q07890                                                                                                 | 2             | 2.9596           | R.DISTCPNSPSTPPSTPSPR.V      | 1            | SOS2_HUMAN           |
| <b><i>SON protein - Homo sapiens (Human)</i></b>                                                       |               |                  |                              |              |                      |
| P18583                                                                                                 | 3             | 4.3328           | K.RLTDLDKAQLLEIAK.A          | 1            | SON_HUMAN            |
| P18583                                                                                                 | 2             | 3.5389           | K.SVESTSPEPSK.I              | 3            | SON_HUMAN            |
| <b><i>Sorbin and SH3 domain-containing protein 2 - Homo sapiens (Human)</i></b>                        |               |                  |                              |              |                      |

| <i>Accession No*</i>                                                | <i>Charge</i> | <i>XC(Max)**</i> | <i>Peptide*</i>                    | <i>TC***</i> | <i>Reference No*</i> |
|---------------------------------------------------------------------|---------------|------------------|------------------------------------|--------------|----------------------|
| O94875                                                              | 3             | 4.3406           | K.SSILQHERPASLYQSSIDR.S            | 3            | O94875_HUMAN         |
| <b><i>Sorting nexin-11 - Homo sapiens (Human)</i></b>               |               |                  |                                    |              |                      |
| Q9Y5W9                                                              | 3             | 4.698            | R.AVGGDHAVPLDPGQLETVLEK.-          | 1            | SNX11_HUMAN          |
| <b><i>Sorting nexin-2 - Homo sapiens (Human)</i></b>                |               |                  |                                    |              |                      |
| O60749                                                              | 2             | 4.3423           | R.AVNTQALSGAGILR.M                 | 2            | SNX2_HUMAN           |
| O60749                                                              | 2             | 3.0632           | K.SMSAPVIFDR.S                     | 2            | SNX2_HUMAN           |
| <b><i>Sorting nexin-3 - Homo sapiens (Human)</i></b>                |               |                  |                                    |              |                      |
| O60493                                                              | 2             | 2.9652           | R.YSDFEWLR.S                       | 1            | SNX3_HUMAN           |
| O60493                                                              | 3             | 4.2365           | R.LITKPQNLNDAYGPPSNFLEIDVSNPQTVGVG | 1            | SNX3_HUMAN           |
| O60493                                                              | 3             | 3.8615           | R.KQGLEQFINK.V                     | 7            | SNX3_HUMAN           |
| O60493                                                              | 3             | 3.7191           | K.VAGHPLAQNER.C                    | 1            | SNX3_HUMAN           |
| <b><i>Sorting nexin-5 - Homo sapiens (Human)</i></b>                |               |                  |                                    |              |                      |
| Q9Y5X3                                                              | 2             | 3.9893           | R.NNVSLQLQSCIDLFK.N                | 2            | SNX5_HUMAN           |
| <b><i>Sorting nexin-9 - Homo sapiens (Human)</i></b>                |               |                  |                                    |              |                      |
| Q9Y5X1                                                              | 2             | 4.2299           | K.SGNWESSEGWGAQPEGAGAQR.N          | 5            | SNX9_HUMAN           |
| <b><i>SOX-12 protein - Homo sapiens (Human)</i></b>                 |               |                  |                                    |              |                      |
| O15370                                                              | 2             | 3.6483           | R.DGGPPPPGPGPAEEGAR.E              | 2            | SOX12_HUMAN          |
| <b><i>SPARC precursor - Homo sapiens (Human)</i></b>                |               |                  |                                    |              |                      |
| P09486                                                              | 2             | 4.9179           | K.NVLVLTLYERDEDNLLTEK.Q            | 2            | SPRC_HUMAN           |
| P09486                                                              | 2             | 4.0778           | R.LEAGDHPVELLAR.D                  | 1            | SPRC_HUMAN           |
| <b><i>SPARC-like protein 1 precursor - Homo sapiens (Human)</i></b> |               |                  |                                    |              |                      |
| Q14515                                                              | 3             | 3.7948           | K.TVSEALLM#EPTDDGNTTPR.N           | 2            | SPRL1_HUMAN          |
| Q14515                                                              | 3             | 5.2104           | K.VHENENIGTTEPGEHQEAK.K            | 3            | SPRL1_HUMAN          |
| Q14515                                                              | 4             | 5.3811           | R.DQGNQEQDPNISNGEEEEKEPGEVGTND     | 1            | SPRL1_HUMAN          |
| Q14515                                                              | 2             | 3.8758           | R.LLAGDHPIDLLLR.D                  | 1            | SPRL1_HUMAN          |
| <b><i>Spartin - Homo sapiens (Human)</i></b>                        |               |                  |                                    |              |                      |
| Q8N0X7                                                              | 2             | 3.6961           | R.IQPEEKPVEVSPAVTK.G               | 4            | SPG20_HUMAN          |
| <b><i>Spastin - Homo sapiens (Human)</i></b>                        |               |                  |                                    |              |                      |
| Q9UBP0                                                              | 2             | 2.8314           | K.TGSAGLSGHHR.A                    | 3            | SPAST_HUMAN          |
| Q9UBP0                                                              | 2             | 4.0507           | R.APSYSGLSMVSGVK.Q                 | 2            | SPAST_HUMAN          |
| <b><i>Spectrin alpha chain, brain - Homo sapiens (Human)</i></b>    |               |                  |                                    |              |                      |
| Q13813                                                              | 2             | 3.2528           | R.ELPTAFDYVEFTR.S                  | 2            | SPTA2_HUMAN          |
| Q13813                                                              | 2             | 3.7956           | R.DVEDEETWIR.E                     | 3            | SPTA2_HUMAN          |
| Q13813                                                              | 3             | 4.1329           | R.DVEDEETWIREKEPIAASTNR.G          | 1            | SPTA2_HUMAN          |
| Q13813                                                              | 2             | 5.2294           | R.LIQSHPESAEDLQEK.C                | 3            | SPTA2_HUMAN          |

| <i>Accession No*</i> | <i>Charge</i> | <i>XC(Max)**</i> | <i>Peptide*</i>                  | <i>TC***</i> | <i>Reference No*</i> |
|----------------------|---------------|------------------|----------------------------------|--------------|----------------------|
| Q13813               | 3             | 4.7177           | R.EAFLNTEDKGDSDLDSVEALIK.K       | 2            | SPTA2_HUMAN          |
| Q13813               | 3             | 5.7781           | R.DLAALGDKVNSLGETAER.L           | 3            | SPTA2_HUMAN          |
| Q13813               | 2             | 3.9969           | R.EANELQQWINEK.E                 | 4            | SPTA2_HUMAN          |
| Q13813               | 2             | 2.9207           | R.EANQQQQFNR.N                   | 1            | SPTA2_HUMAN          |
| Q13813               | 2             | 3.9796           | R.EELITNWEQIR.T                  | 1            | SPTA2_HUMAN          |
| Q13813               | 2             | 2.7631           | R.EKEPIAASTNR.G                  | 1            | SPTA2_HUMAN          |
| Q13813               | 3             | 4.3841           | R.FLADFRDLTSWVTEMK.A             | 2            | SPTA2_HUMAN          |
| Q13813               | 2             | 3.7387           | R.FNRDVEDETISWIK.E               | 2            | SPTA2_HUMAN          |
| Q13813               | 2             | 4.3182           | R.GKDLIGVQNLLK.K                 | 4            | SPTA2_HUMAN          |
| Q13813               | 3             | 4.1333           | R.GLVSSDELAKDVTGAEALLER.H        | 1            | SPTA2_HUMAN          |
| Q13813               | 2             | 3.9786           | R.GVIDMGNSLIER.G                 | 3            | SPTA2_HUMAN          |
| Q13813               | 3             | 4.3234           | R.MKQVEELYHSLLELGEK.R            | 2            | SPTA2_HUMAN          |
| Q13813               | 2             | 3.3208           | R.SLQQLAEER.S                    | 1            | SPTA2_HUMAN          |
| Q13813               | 2             | 4.1985           | R.SQLLGSAAHEVQR.F                | 2            | SPTA2_HUMAN          |
| Q13813               | 2             | 3.4433           | R.DLAALEDKVK.A                   | 2            | SPTA2_HUMAN          |
| Q13813               | 2             | 3.7063           | R.YEALKEPMVAR.K                  | 3            | SPTA2_HUMAN          |
| Q13813               | 3             | 3.92             | K.KHQALQAEIAGHEPR.I              | 1            | SPTA2_HUMAN          |
| Q13813               | 2             | 4.3985           | R.DAEELEKWIQEK.L                 | 1            | SPTA2_HUMAN          |
| Q13813               | 3             | 3.7223           | R.NTTGVTEEALKEFSMMFK.H           | 1            | SPTA2_HUMAN          |
| Q13813               | 2             | 5.4529           | K.EAALTSEEVGADLEQVEVLQK.K        | 7            | SPTA2_HUMAN          |
| Q13813               | 3             | 3.7077           | K.GNAMVEEGHFAAEDVK.A             | 1            | SPTA2_HUMAN          |
| Q13813               | 3             | 3.8793           | K.IAALQAFADQLIAAGHYAK.G          | 1            | SPTA2_HUMAN          |
| Q13813               | 4             | 4.7375           | K.KFEFQTDMAAHEERVNEVNQFAAK.L     | 1            | SPTA2_HUMAN          |
| Q13813               | 3             | 4.7983           | K.KHEALMSDLSAYGSSIQALR.E         | 3            | SPTA2_HUMAN          |
| Q13813               | 2             | 4.096            | K.LFGAAEVQR.F                    | 3            | SPTA2_HUMAN          |
| Q13813               | 2             | 4.2205           | K.LGESQTLQQFSR.D                 | 3            | SPTA2_HUMAN          |
| Q13813               | 2             | 3.2925           | K.LHELNQKWEALK.A                 | 1            | SPTA2_HUMAN          |
| Q13813               | 2             | 3.7511           | K.SSEIESAFR.A                    | 3            | SPTA2_HUMAN          |
| Q13813               | 4             | 5.3289           | R.DAETKEWIEEKNQALNTDNYGHDLASVQAL | 1            | SPTA2_HUMAN          |
| Q13813               | 3             | 4.6564           | K.KGDILLLLSTNKDWWK.V             | 5            | SPTA2_HUMAN          |
| Q13813               | 2             | 3.9555           | K.VLETAEDIQER.R                  | 4            | SPTA2_HUMAN          |
| Q13813               | 2             | 3.9686           | K.LIQEQHPPEELIK.T                | 2            | SPTA2_HUMAN          |
| Q13813               | 3             | 4.2074           | K.SADESGQALLAAGHYASDEVREK.L      | 1            | SPTA2_HUMAN          |
| Q13813               | 4             | 5.0247           | K.RLEAEAAHEPAIQGVLDTGKK.L        | 1            | SPTA2_HUMAN          |
| Q13813               | 2             | 4.3793           | K.REELITNWEQIR.T                 | 1            | SPTA2_HUMAN          |
| Q13813               | 3             | 4.3838           | K.NQALNTDNYGHDLASVQALQR.K        | 2            | SPTA2_HUMAN          |

| <i>Accession No*</i>                                                                                | <i>Charge</i> | <i>XC(Max)**</i> | <i>Peptide*</i>                | <i>TC***</i> | <i>Reference No*</i> |
|-----------------------------------------------------------------------------------------------------|---------------|------------------|--------------------------------|--------------|----------------------|
| Q13813                                                                                              | 3             | 4.1638           | K.LSDDNTIGKEEIQQR.L            | 4            | SPTA2_HUMAN          |
| Q13813                                                                                              | 2             | 3.4343           | K.VLETAEDIQERR.Q               | 2            | SPTA2_HUMAN          |
| <b><i>Spectrin beta chain, brain 1 - Homo sapiens (Human)</i></b>                                   |               |                  |                                |              |                      |
| Q01082                                                                                              | 2             | 3.3785           | R.DQNTVETLQR.M                 | 2            | SPTB2_HUMAN          |
| Q01082                                                                                              | 2             | 3.8555           | K.FM#ELLEPLNER.K               | 3            | SPTB2_HUMAN          |
| Q01082                                                                                              | 2             | 3.817            | R.TQETPSAQMEGFLNR.K            | 5            | SPTB2_HUMAN          |
| Q01082                                                                                              | 2             | 4.1245           | R.LTTLELLEVR.R                 | 2            | SPTB2_HUMAN          |
| Q01082                                                                                              | 3             | 4.8631           | R.KKEIEELQSQAQALSQEGK.S        | 2            | SPTB2_HUMAN          |
| Q01082                                                                                              | 3             | 4.7994           | R.EVVAGSHELGGDYEHVTMLQER.F     | 1            | SPTB2_HUMAN          |
| Q01082                                                                                              | 2             | 3.1626           | R.EVDDLEQWIAER.E               | 1            | SPTB2_HUMAN          |
| Q01082                                                                                              | 2             | 2.8328           | R.ETASELLMRLKDNR.D             | 1            | SPTB2_HUMAN          |
| Q01082                                                                                              | 2             | 4.7956           | R.AQTLPTS SVVTITSESSPGKR.E     | 4            | SPTB2_HUMAN          |
| Q01082                                                                                              | 2             | 5.1109           | R.AQTLPTS SVVTITSESSPGK.R      | 3            | SPTB2_HUMAN          |
| Q01082                                                                                              | 2             | 4.3484           | K.TALPAQSAATL PAR.T            | 4            | SPTB2_HUMAN          |
| Q01082                                                                                              | 2             | 3.4846           | K.MWEVLESTTQTK.A               | 2            | SPTB2_HUMAN          |
| Q01082                                                                                              | 2             | 3.7139           | K.FMELLEPLNER.K                | 2            | SPTB2_HUMAN          |
| Q01082                                                                                              | 3             | 6.1888           | R.DASVAEAWLLGQEPYLSSR.E        | 1            | SPTB2_HUMAN          |
| Q01082                                                                                              | 3             | 6.9194           | K.HQILEQAVEDYAETVHQLSK.T       | 2            | SPTB2_HUMAN          |
| <b><i>Spectrin beta chain, erythrocyte - Homo sapiens (Human)</i></b>                               |               |                  |                                |              |                      |
| P11277                                                                                              | 2             | 4.1607           | R.LLSGEDVGGDEGATR.A            | 2            | SPTB1_HUMAN          |
| <b><i>Sperm antigen with calponin homology and coiled-coil domains 1 - Homo sapiens (Human)</i></b> |               |                  |                                |              |                      |
| Q5M775                                                                                              | 2             | 3.8934           | K.SVSSPTSSNTPTPTK.H            | 3            | SPEC1_HUMAN          |
| Q5M775                                                                                              | 2             | 4.3437           | R.ASSEDTLNKP GSTAASGVVR.L      | 4            | SPEC1_HUMAN          |
| Q5M775                                                                                              | 3             | 4.1762           | R.GVTQRDLPLDPLSDILK.G          | 2            | SPEC1_HUMAN          |
| Q5M775                                                                                              | 2             | 5.0494           | R.KSVSSPTSSNTPTPTK.H           | 2            | SPEC1_HUMAN          |
| Q5M775                                                                                              | 2             | 2.7923           | R.LDLPLDPLSDILK.G              | 1            | SPEC1_HUMAN          |
| Q5M775                                                                                              | 2             | 4.0111           | R.VKNEEPTTQEGK.I               | 3            | SPEC1_HUMAN          |
| Q5M775                                                                                              | 3             | 4.0526           | R.AEQLSQENEKLMNLLQER.V         | 1            | SPEC1_HUMAN          |
| Q5M775                                                                                              | 3             | 4.6925           | R.LKEENEKLNFELELER.H           | 1            | SPEC1_HUMAN          |
| Q5M775                                                                                              | 2             | 3.7071           | K.TATAGAISELTESR.L             | 2            | SPEC1_HUMAN          |
| Q5M775                                                                                              | 2             | 3.7781           | R.AEQLSQENEK.L                 | 3            | SPEC1_HUMAN          |
| Q5M775                                                                                              | 2             | 2.9038           | K.LMNLQER.V                    | 1            | SPEC1_HUMAN          |
| Q5M775                                                                                              | 2             | 4.5078           | K.LLNIQQQLTCSLR.K              | 1            | SPEC1_HUMAN          |
| Q5M775                                                                                              | 4             | 5.0931           | K.LHNNQLISELESSVIKLEEQK.S      | 1            | SPEC1_HUMAN          |
| Q5M775                                                                                              | 4             | 4.7421           | K.ASESDAEIKDMKETIFELEDQVEQHR.A | 1            | SPEC1_HUMAN          |

| <i>Accession No*</i>                                                                   | <i>Charge</i> | <i>XC(Max)**</i> | <i>Peptide*</i>                    | <i>TC***</i> | <i>Reference No*</i> |
|----------------------------------------------------------------------------------------|---------------|------------------|------------------------------------|--------------|----------------------|
| Q5M775                                                                                 | 3             | 3.8083           | R.AEQLSQENEKLM#NLLQER.V            | 1            | SPEC1_HUMAN          |
| <b><i>Sperm-associated antigen 1 - Homo sapiens (Human)</i></b>                        |               |                  |                                    |              |                      |
| Q07617                                                                                 | 2             | 2.7536           | K.C*SDVKHLEKILC*VLR.S              | 1            | SPAG1_HUMAN          |
| Q07617                                                                                 | 2             | 3.0007           | R.SISALPTVVAYNNR.A                 | 1            | SPAG1_HUMAN          |
| <b><i>Sperm-associated antigen 7 - Homo sapiens (Human)</i></b>                        |               |                  |                                    |              |                      |
| O75391                                                                                 | 2             | 3.0574           | K.DAAHM#LQANK.T                    | 2            | SPAG7_HUMAN          |
| O75391                                                                                 | 2             | 3.5325           | R.SIEEAMNEIR.A                     | 2            | SPAG7_HUMAN          |
| O75391                                                                                 | 2             | 2.8602           | R.SIEEAM#NEIR.A                    | 1            | SPAG7_HUMAN          |
| O75391                                                                                 | 2             | 3.8915           | K.DAAHMLQANK.T                     | 3            | SPAG7_HUMAN          |
| O75391                                                                                 | 2             | 3.644            | K.EVSDFIQDSGQIK.K                  | 1            | SPAG7_HUMAN          |
| <b><i>Spermatogenesis-associated serine-rich protein 2. - Homo sapiens (Human)</i></b> |               |                  |                                    |              |                      |
| Q86XZ4                                                                                 | 2             | 2.9136           | K.SVSIQEEQSAPSSEK.G                | 1            | Q86XZ4_HUMAN         |
| Q86XZ4                                                                                 | 2             | 2.8758           | R.ELEDPEESAM#LDTLDR.T              | 1            | Q86XZ4_HUMAN         |
| Q86XZ4                                                                                 | 1             | 2.1424           | R.TSQTEAVNS.-                      | 1            | Q86XZ4_HUMAN         |
| Q86XZ4                                                                                 | 2             | 3.65             | R.YQSAPSQAPGNTIER.G                | 3            | Q86XZ4_HUMAN         |
| <b><i>Sperm-specific antigen 2 - Homo sapiens (Human)</i></b>                          |               |                  |                                    |              |                      |
| P28290                                                                                 | 2             | 2.911            | R.ASVALTPTAPSR.T                   | 1            | SSFA2_HUMAN          |
| P28290                                                                                 | 2             | 4.8764           | R.EIVSGLLAAVSSSK.A                 | 3            | SSFA2_HUMAN          |
| P28290                                                                                 | 3             | 4.2914           | R.IGSMSSVTSNKETDPPPLTR.S           | 1            | SSFA2_HUMAN          |
| P28290                                                                                 | 2             | 3.2673           | K.NVEQDELQQVIR.E                   | 2            | SSFA2_HUMAN          |
| <b><i>S-phase kinase-associated protein 1A - Homo sapiens (Human)</i></b>              |               |                  |                                    |              |                      |
| P63208                                                                                 | 2             | 2.769            | K.GKTPEEIRK.T                      | 1            | SKP1_HUMAN           |
| P63208                                                                                 | 2             | 3.3999           | K.NDFTEEEEAQVR.K                   | 3            | SKP1_HUMAN           |
| P63208                                                                                 | 2             | 4.8563           | K.TFNIKNDFTEEEEEAQVR.K             | 4            | SKP1_HUMAN           |
| P63208                                                                                 | 3             | 5.4507           | K.TFNIKNDFTEEEEEAQVRK.E            | 2            | SKP1_HUMAN           |
| P63208                                                                                 | 3             | 5.1981           | K.TM#LEDLGM#DDEGDDDPVPLPNVNAAILKK. | 2            | SKP1_HUMAN           |
| P63208                                                                                 | 3             | 4.3129           | K.TMLEDLGMDDDEGDDDPVPLPNVNAAILKK.V | 1            | SKP1_HUMAN           |
| <b><i>Splicing factor 1 - Homo sapiens (Human)</i></b>                                 |               |                  |                                    |              |                      |
| Q15637                                                                                 | 3             | 4.3037           | K.VMIPQDEYPEINFVGLLIGPR.G          | 3            | SF01_HUMAN           |
| Q15637                                                                                 | 3             | 4.0312           | R.VSDKVM#IPQDEYPEINFVGLLIGPR.G     | 1            | SF01_HUMAN           |
| Q15637                                                                                 | 4             | 6.1131           | R.HNLITEMVALNPDFKPPADYKPPATR.V     | 2            | SF01_HUMAN           |
| Q15637                                                                                 | 3             | 4.0294           | K.DGQM#LPGEDEPLHALVTANTMENVK.K     | 1            | SF01_HUMAN           |
| Q15637                                                                                 | 2             | 3.8284           | R.ILRPWQSSETR.S                    | 3            | SF01_HUMAN           |
| <b><i>Splicing factor 3B subunit 1 - Homo sapiens (Human)</i></b>                      |               |                  |                                    |              |                      |
| O75533                                                                                 | 2             | 3.5116           | K.THEDIEAQIR.E                     | 4            | SF3B1_HUMAN          |

| <i>Accession No*</i>                                                         | <i>Charge</i> | <i>XC(Max)**</i> | <i>Peptide*</i>                    | <i>TC***</i> | <i>Reference No*</i> |
|------------------------------------------------------------------------------|---------------|------------------|------------------------------------|--------------|----------------------|
| O75533                                                                       | 3             | 3.9052           | R.NRPLSDEELDAMFPEGYK.V             | 1            | SF3B1_HUMAN          |
| O75533                                                                       | 2             | 2.7949           | R.LDPFADGGKTPDPK.M                 | 1            | SF3B1_HUMAN          |
| O75533                                                                       | 2             | 3.4381           | R.GGDSIGETPTPGASK.R                | 2            | SF3B1_HUMAN          |
| O75533                                                                       | 3             | 4.0008           | R.GDTPGHATPGHGGATSSAR.K            | 1            | SF3B1_HUMAN          |
| O75533                                                                       | 2             | 3.7213           | R.AKGSETPGATPGSK.I                 | 2            | SF3B1_HUMAN          |
| O75533                                                                       | 2             | 4.9528           | R.WDQTADQTPGATPK.K                 | 3            | SF3B1_HUMAN          |
| O75533                                                                       | 3             | 5.2516           | K.KPGYHAPVALLNDIPQSTEQYDPFAEHRPPK. | 2            | SF3B1_HUMAN          |
| O75533                                                                       | 3             | 4.994            | K.KLSSWDQAETPGHTPSLR.W             | 2            | SF3B1_HUMAN          |
| O75533                                                                       | 3             | 5.1268           | K.KAALDEAQGVGLDSTGYDQEIYGGSDSR.F   | 1            | SF3B1_HUMAN          |
| O75533                                                                       | 3             | 3.9224           | K.IADREDEYKK.H                     | 1            | SF3B1_HUMAN          |
| O75533                                                                       | 2             | 3.0252           | K.GSETPGATPGSK.I                   | 3            | SF3B1_HUMAN          |
| O75533                                                                       | 2             | 2.8894           | K.AALDEAQGVGLDSTGYDQEIYGGSDSR.F    | 1            | SF3B1_HUMAN          |
| O75533                                                                       | 2             | 3.4875           | K.VVNGAAASQPPSK.R                  | 2            | SF3B1_HUMAN          |
| O75533                                                                       | 2             | 3.5849           | K.VVNGAAASQPPSKR.K                 | 1            | SF3B1_HUMAN          |
| <b><i>Splicing factor 3B subunit 2 - Homo sapiens (Human)</i></b>            |               |                  |                                    |              |                      |
| Q13435                                                                       | 3             | 7.4529           | K.ESRQEEMNSQEEEEEMTDAR.S           | 3            | SF3B2_HUMAN          |
| Q13435                                                                       | 3             | 4.7143           | R.QEEMNSQEEEEEMTDAR.S              | 3            | SF3B2_HUMAN          |
| Q13435                                                                       | 3             | 5.3215           | R.QEEMNSQEEEEEM#ETDAR.S            | 1            | SF3B2_HUMAN          |
| Q13435                                                                       | 2             | 3.1736           | R.QEEM#NSQEEEEEMTDAR.S             | 1            | SF3B2_HUMAN          |
| Q13435                                                                       | 2             | 3.5694           | R.GVSSSESGDREKDSTR.S               | 2            | SF3B2_HUMAN          |
| Q13435                                                                       | 2             | 2.8722           | R.GPPPPPGDENREMDDPVSGPK.I          | 1            | SF3B2_HUMAN          |
| Q13435                                                                       | 2             | 4.4223           | R.AAVLLEQERQEIAK.M                 | 4            | SF3B2_HUMAN          |
| Q13435                                                                       | 1             | 2.3795           | K.IPQALEK.I                        | 1            | SF3B2_HUMAN          |
| Q13435                                                                       | 3             | 5.8383           | K.ESRQEEMNSQEEEEEM#ETDAR.S         | 1            | SF3B2_HUMAN          |
| Q13435                                                                       | 3             | 6.8698           | K.ESRQEEM#NSQEEEEEMTDAR.S          | 2            | SF3B2_HUMAN          |
| Q13435                                                                       | 2             | 3.0171           | K.MGTPVPRPPQDMGQIGVR.T             | 2            | SF3B2_HUMAN          |
| <b><i>Splicing factor 4 - Homo sapiens (Human)</i></b>                       |               |                  |                                    |              |                      |
| Q8IWZ8                                                                       | 2             | 4.0987           | R.DVDASPSPLSVQDLK.G                | 4            | SF04_HUMAN           |
| Q8IWZ8                                                                       | 3             | 3.8481           | K.AQTSTDAPTSAPSAPPSTPTPSAGKR.S     | 1            | SF04_HUMAN           |
| Q8IWZ8                                                                       | 3             | 3.8165           | K.MNMNILHQEELIAQK.K                | 1            | SF04_HUMAN           |
| <b><i>Splicing factor U2AF 35 kDa subunit - Homo sapiens (Human)</i></b>     |               |                  |                                    |              |                      |
| Q01081                                                                       | 2             | 3.9628           | R.NPQNSSQSADGLR.C                  | 2            | U2AF1_HUMAN          |
| <b><i>Splicing factor, arginine/serine-rich 1 - Homo sapiens (Human)</i></b> |               |                  |                                    |              |                      |
| Q07955                                                                       | 2             | 4.17             | R.IYVGNLPPDIR.T                    | 26           | SFRS1_HUMAN          |
| Q07955                                                                       | 3             | 4.3374           | R.TKDIEDVFK.Y                      | 5            | SFRS1_HUMAN          |

| <i>Accession No*</i>                                                          | <i>Charge</i> | <i>XC(Max)**</i> | <i>Peptide*</i>                  | <i>TC***</i> | <i>Reference No*</i> |
|-------------------------------------------------------------------------------|---------------|------------------|----------------------------------|--------------|----------------------|
| Q07955                                                                        | 2             | 3.3102           | R.SHEGETAYIR.V                   | 8            | SFRS1_HUMAN          |
| Q07955                                                                        | 4             | 5.1012           | R.RGGPPFAFVEFEDPRDAEDAVYGR.D     | 2            | SFRS1_HUMAN          |
| Q07955                                                                        | 3             | 3.9028           | R.KEDMTYAVRK.L                   | 3            | SFRS1_HUMAN          |
| Q07955                                                                        | 1             | 3.3108           | K.DIEDVIFYK.Y                    | 2            | SFRS1_HUMAN          |
| Q07955                                                                        | 2             | 2.9623           | R.KEDM#TYAVR.K                   | 3            | SFRS1_HUMAN          |
| Q07955                                                                        | 2             | 2.8106           | R.GGPPFAFVEFEDPR.D               | 1            | SFRS1_HUMAN          |
| Q07955                                                                        | 2             | 3.6863           | R.EAGDVCYADVYR.D                 | 3            | SFRS1_HUMAN          |
| Q07955                                                                        | 2             | 3.7299           | R.DGYDYDGYR.L                    | 10           | SFRS1_HUMAN          |
| Q07955                                                                        | 2             | 2.9126           | R.DGTGVVEFVRK.E                  | 4            | SFRS1_HUMAN          |
| Q07955                                                                        | 2             | 3.2492           | R.DGTGVVEFVR.K                   | 6            | SFRS1_HUMAN          |
| Q07955                                                                        | 3             | 4.1168           | R.DAEDAVYGRDGYDYDGYR.L           | 3            | SFRS1_HUMAN          |
| Q07955                                                                        | 2             | 3.0342           | R.DAEDAVYGR.D                    | 2            | SFRS1_HUMAN          |
| Q07955                                                                        | 3             | 4.3416           | K.FRSHEGETAYIR.V                 | 4            | SFRS1_HUMAN          |
| Q07955                                                                        | 2             | 3.2764           | R.KEDMTYAVR.K                    | 7            | SFRS1_HUMAN          |
| <b><i>Splicing factor, arginine/serine-rich 15 - Homo sapiens (Human)</i></b> |               |                  |                                  |              |                      |
| O95104                                                                        | 3             | 5.9037           | K.GVSEAAVLKPEELPAEATSSVEPEKDSGSA | 2            | SFR15_HUMAN          |
| O95104                                                                        | 2             | 6.1165           | K.TVEPPISQVGNVDTASELEK.G         | 5            | SFR15_HUMAN          |
| <b><i>Splicing factor, arginine/serine-rich 16 - Homo sapiens (Human)</i></b> |               |                  |                                  |              |                      |
| Q8N2M8                                                                        | 2             | 3.1285           | K.QATTYGMADGDFVR.M               | 1            | SFR16_HUMAN          |
| Q8N2M8                                                                        | 3             | 3.7281           | K.LTRPAASPAVGEK.L                | 1            | SFR16_HUMAN          |
| <b><i>Splicing factor, arginine/serine-rich 2 - Homo sapiens (Human)</i></b>  |               |                  |                                  |              |                      |
| Q01130                                                                        | 2             | 3.2472           | R.YGRPPDSHHSR.R                  | 4            | SFRS2_HUMAN          |
| Q01130                                                                        | 1             | 2.5722           | R.YGGGGYGR.R                     | 4            | SFRS2_HUMAN          |
| Q01130                                                                        | 2             | 3.3558           | R.RYGGGGYGR.R                    | 6            | SFRS2_HUMAN          |
| <b><i>Splicing factor, arginine/serine-rich 2B - Homo sapiens (Human)</i></b> |               |                  |                                  |              |                      |
| Q9BRL6                                                                        | 2             | 3.3748           | R.DAQDAEAAM#DGAELDGR.E           | 2            | Q9BRL6_HUMA          |
| Q9BRL6                                                                        | 2             | 4.3278           | R.DAQDAEAAMDGAELDGR.E            | 1            | Q9BRL6_HUMA          |
| <b><i>Splicing factor, arginine/serine-rich 3 - Homo sapiens (Human)</i></b>  |               |                  |                                  |              |                      |
| P84103                                                                        | 3             | 4.8896           | R.VRVELSNGEKR.S                  | 1            | SFRS3_HUMAN          |
| P84103                                                                        | 2             | 3.9218           | K.VYVGNLGNNGNK.T                 | 4            | SFRS3_HUMAN          |
| P84103                                                                        | 2             | 4.2894           | K.VYVGNLGNNGNKTELER.A            | 2            | SFRS3_HUMAN          |
| P84103                                                                        | 2             | 2.9265           | R.AFGYYGPLR.S                    | 2            | SFRS3_HUMAN          |
| P84103                                                                        | 1             | 2.5805           | R.DAADAVR.E                      | 2            | SFRS3_HUMAN          |
| P84103                                                                        | 2             | 2.9116           | R.VELSNGEKR.S                    | 1            | SFRS3_HUMAN          |
| <b><i>Splicing factor, arginine/serine-rich 4 - Homo sapiens (Human)</i></b>  |               |                  |                                  |              |                      |

| <i>Accession No*</i>                                                              | <i>Charge</i> | <i>XC(Max)**</i> | <i>Peptide*</i>             | <i>TC***</i> | <i>Reference No*</i> |
|-----------------------------------------------------------------------------------|---------------|------------------|-----------------------------|--------------|----------------------|
| Q08170                                                                            | 2             | 3.0446           | R.LVEDKPGSR.R               | 2            | SFRS4_HUMAN          |
| Q08170                                                                            | 3             | 5.1471           | R.KNEGVIEFVSYSMDMKR.A       | 2            | SFRS4_HUMAN          |
| Q08170                                                                            | 2             | 3.7071           | R.GESENAGTNQETR.S           | 3            | SFRS4_HUMAN          |
| Q08170                                                                            | 2             | 4.2698           | R.EGRGESENAGTNQETR.S        | 7            | SFRS4_HUMAN          |
| Q08170                                                                            | 3             | 4.1394           | R.ALEKLDGTEVNGR.I           | 1            | SFRS4_HUMAN          |
| Q08170                                                                            | 2             | 3.2458           | R.ALEKLDGTEVNGR.K           | 1            | SFRS4_HUMAN          |
| Q08170                                                                            | 2             | 2.7106           | K.SKPNLPSES.R               | 1            | SFRS4_HUMAN          |
| Q08170                                                                            | 2             | 4.5623           | K.NEGVIEFVSYSMDMKR.A        | 3            | SFRS4_HUMAN          |
| Q08170                                                                            | 2             | 3.7471           | K.IQNNDNVGKPK.S             | 2            | SFRS4_HUMAN          |
| Q08170                                                                            | 2             | 3.0211           | K.LDGTEVNGR.K               | 2            | SFRS4_HUMAN          |
| <b><i>Splicing factor, arginine/serine-rich 5 - Homo sapiens (Human)</i></b>      |               |                  |                             |              |                      |
| Q13243                                                                            | 2             | 2.9234           | R.VSWQDLK.D                 | 2            | SFRS5_HUMAN          |
| Q13243                                                                            | 2             | 3.4644           | R.VSWQDLKDFMR.Q             | 3            | SFRS5_HUMAN          |
| <b><i>Splicing factor, arginine/serine-rich 7 - Homo sapiens (Human)</i></b>      |               |                  |                             |              |                      |
| Q16629                                                                            | 2             | 3.1237           | R.AFSYYGPLR.T               | 2            | SFRS7_HUMAN          |
| Q16629                                                                            | 2             | 2.7671           | R.RPFPDNR.C                 | 2            | SFRS7_HUMAN          |
| Q16629                                                                            | 2             | 2.8333           | R.VELSTGMPR.R               | 1            | SFRS7_HUMAN          |
| Q16629                                                                            | 2             | 3.321            | R.VRVELSTGMPR.R             | 2            | SFRS7_HUMAN          |
| Q16629                                                                            | 3             | 4.2283           | R.VRVELSTGMPRR.S            | 1            | SFRS7_HUMAN          |
| Q16629                                                                            | 2             | 4.6135           | K.VYVGNLGTGAGKGELE.R        | 2            | SFRS7_HUMAN          |
| <b><i>Splicing factor, arginine/serine-rich 9 - Homo sapiens (Human)</i></b>      |               |                  |                             |              |                      |
| Q13242                                                                            | 2             | 3.3133           | R.HGLVPFAFVR.F              | 3            | SFRS9_HUMAN          |
| Q13242                                                                            | 2             | 3.1654           | R.SHEGETSYIR.V              | 2            | SFRS9_HUMAN          |
| Q13242                                                                            | 2             | 3.9973           | R.IYVGNLPTDVR.E             | 5            | SFRS9_HUMAN          |
| Q13242                                                                            | 3             | 3.7001           | R.FEDPRDAEDAIYGR.N          | 1            | SFRS9_HUMAN          |
| Q13242                                                                            | 2             | 3.3371           | R.EKDLEDLFYK.Y              | 1            | SFRS9_HUMAN          |
| Q13242                                                                            | 2             | 3.1992           | R.KEDMEYALR.K               | 2            | SFRS9_HUMAN          |
| <b><i>Splicing factor, proline- and glutamine-rich - Homo sapiens (Human)</i></b> |               |                  |                             |              |                      |
| P23246                                                                            | 2             | 2.8816           | R.GM#GPGTPAGYGR.G           | 1            | SFPQ_HUMAN           |
| P23246                                                                            | 3             | 3.7387           | R.RMEELHNQEM#QK.R           | 1            | SFPQ_HUMAN           |
| P23246                                                                            | 2             | 3.6881           | R.RMEELHNQEMQK.R            | 1            | SFPQ_HUMAN           |
| P23246                                                                            | 3             | 4.352            | R.PVIVEPLEQLDDEDGLPEKLAQK.N | 1            | SFPQ_HUMAN           |
| P23246                                                                            | 3             | 4.6089           | R.NLSPYVSNELLEAFSQFGPIER.A  | 2            | SFPQ_HUMAN           |
| P23246                                                                            | 2             | 3.2479           | R.MGGGGAMNMGDPYGGGQK.F      | 2            | SFPQ_HUMAN           |
| P23246                                                                            | 2             | 2.9167           | R.MGGGGAMNM#GDPYGGGQK.F     | 1            | SFPQ_HUMAN           |



| <i>Accession No*</i>                                                                                        | <i>Charge</i> | <i>XC(Max)**</i> | <i>Peptide*</i>                   | <i>TC***</i> | <i>Reference No*</i> |
|-------------------------------------------------------------------------------------------------------------|---------------|------------------|-----------------------------------|--------------|----------------------|
| P23246                                                                                                      | 2             | 3.7051           | R.MEELHNQEMQK.R                   | 1            | SFPQ_HUMAN           |
| P23246                                                                                                      | 4             | 5.4671           | K.DAKDKLESEMEDAYHEHQANLLR.Q       | 2            | SFPQ_HUMAN           |
| P23246                                                                                                      | 2             | 5.1842           | R.FAQHGTFEYEYSQR.W                | 6            | SFPQ_HUMAN           |
| P23246                                                                                                      | 2             | 2.8853           | R.EEYEGPNKKPR.F                   | 1            | SFPQ_HUMAN           |
| P23246                                                                                                      | 2             | 3.163            | K.SLDEMEKQQR.E                    | 2            | SFPQ_HUMAN           |
| P23246                                                                                                      | 3             | 4.8149           | K.MPGGPKPGGGPGLSTPGGHPKPPHR.G     | 2            | SFPQ_HUMAN           |
| P23246                                                                                                      | 3             | 3.8415           | K.M#PGGPKPGGGPGLSTPGGHPKPPHR.G    | 2            | SFPQ_HUMAN           |
| P23246                                                                                                      | 2             | 2.7168           | R.SPPPGMGLNQNR.G                  | 1            | SFPQ_HUMAN           |
| P23246                                                                                                      | 2             | 3.5324           | K.LAQKNPMYQK.E                    | 2            | SFPQ_HUMAN           |
| P23246                                                                                                      | 2             | 4.451            | R.FGQGGAGPVGGQGPR.G               | 3            | SFPQ_HUMAN           |
| <b><i>Squamous cell carcinoma antigen recognized by T-cells 3 - Homo sapiens (Human)</i></b>                |               |                  |                                   |              |                      |
| Q15020                                                                                                      | 1             | 2.4191           | K.MSNADFAK.L                      | 1            | SART3_HUMAN          |
| Q15020                                                                                                      | 3             | 6.7294           | R.ALQRPSAAAPQAENGPAAAPAVAAPAATEAP | 1            | SART3_HUMAN          |
| <b><i>SRA stem-loop-interacting RNA-binding protein, mitochondrial precursor - Homo sapiens (Human)</i></b> |               |                  |                                   |              |                      |
| Q9GZT3                                                                                                      | 2             | 4.1138           | K.LPQTSDEKKDF.-                   | 4            | SLIRP_HUMAN          |
| Q9GZT3                                                                                                      | 2             | 4.3128           | R.GLGWVQFSSEGLR.N                 | 2            | SLIRP_HUMAN          |
| Q9GZT3                                                                                                      | 2             | 4.5824           | R.NALQQENHIIDGVK.V                | 3            | SLIRP_HUMAN          |
| Q9GZT3                                                                                                      | 2             | 3.1593           | R.SINQPVAFVR.R                    | 2            | SLIRP_HUMAN          |
| <b><i>Src substrate cortactin - Homo sapiens (Human)</i></b>                                                |               |                  |                                   |              |                      |
| Q14247                                                                                                      | 3             | 3.7775           | R.QDSAAVGFQDYKEK.L                | 7            | SRC8_HUMAN           |
| Q14247                                                                                                      | 3             | 5.0284           | K.FGVQSERQDSAAGVGFQDYKEK.L        | 1            | SRC8_HUMAN           |
| Q14247                                                                                                      | 3             | 5.1925           | K.LAKHESQQDYSK.G                  | 9            | SRC8_HUMAN           |
| Q14247                                                                                                      | 2             | 3.979            | K.LQLHESQKDYK.T                   | 3            | SRC8_HUMAN           |
| <b><i>StAR-related lipid transfer protein 13 - Homo sapiens (Human)</i></b>                                 |               |                  |                                   |              |                      |
| Q9Y3M8                                                                                                      | 2             | 5.7019           | R.TGGLVISGPMLQQEPESFK.A           | 1            | STA13_HUMAN          |
| <b><i>Stathmin - Homo sapiens (Human)</i></b>                                                               |               |                  |                                   |              |                      |
| P16949                                                                                                      | 2             | 3.7078           | K.LTHKMEANKENR.E                  | 2            | STMN1_HUMAN          |
| P16949                                                                                                      | 2             | 2.9235           | K.M#AEEKLTHK.M                    | 1            | STMN1_HUMAN          |
| P16949                                                                                                      | 2             | 3.3655           | K.MAEEKLTHK.M                     | 4            | STMN1_HUMAN          |
| P16949                                                                                                      | 2             | 3.5602           | K.NKESKDPADETead.-                | 3            | STMN1_HUMAN          |
| P16949                                                                                                      | 2             | 3.3766           | K.ESKDPADETead.-                  | 3            | STMN1_HUMAN          |
| <b><i>Stathmin-3 - Homo sapiens (Human)</i></b>                                                             |               |                  |                                   |              |                      |
| Q9NZ72                                                                                                      | 2             | 2.9259           | K.ALEENNNFSR.Q                    | 1            | STMN3_HUMAN          |
| Q9NZ72                                                                                                      | 2             | 2.8112           | K.SPSDLSPESPMLSSPPK.K             | 1            | STMN3_HUMAN          |
| <b><i>STE20-like serine/threonine-protein kinase - Homo sapiens (Human)</i></b>                             |               |                  |                                   |              |                      |

| <i>Accession No*</i>                                                                  | <i>Charge</i> | <i>XC(Max)**</i> | <i>Peptide*</i>            | <i>TC***</i> | <i>Reference No*</i> |
|---------------------------------------------------------------------------------------|---------------|------------------|----------------------------|--------------|----------------------|
| Q9H2G2                                                                                | 1             | 3.7344           | K.ALGSEVQDASK.V            | 6            | SLK_HUMAN            |
| Q9H2G2                                                                                | 1             | 2.3509           | R.SVADTDQK.A               | 1            | SLK_HUMAN            |
| Q9H2G2                                                                                | 2             | 4.1509           | R.KLQEQEVFFK.M             | 4            | SLK_HUMAN            |
| Q9H2G2                                                                                | 2             | 3.1646           | R.INSTATPDQDRDKI.Q         | 1            | SLK_HUMAN            |
| Q9H2G2                                                                                | 2             | 3.7791           | R.INSTATPDQDRDK.I          | 2            | SLK_HUMAN            |
| Q9H2G2                                                                                | 2             | 3.0929           | R.EAAIWELEER.H             | 1            | SLK_HUMAN            |
| Q9H2G2                                                                                | 2             | 2.7141           | K.VTTQIDKEK.K              | 1            | SLK_HUMAN            |
| Q9H2G2                                                                                | 2             | 4.0979           | K.MTGESECLNPSTQSR.I        | 4            | SLK_HUMAN            |
| Q9H2G2                                                                                | 2             | 3.6532           | K.DSGSISLQETR.R            | 2            | SLK_HUMAN            |
| Q9H2G2                                                                                | 3             | 4.2359           | K.LKELDEEHSQELKEWR.E       | 1            | SLK_HUMAN            |
| <b><i>Sterile alpha motif domain-containing protein 14 - Homo sapiens (Human)</i></b> |               |                  |                            |              |                      |
| Q8IZD0                                                                                | 2             | 3.0548           | K.SASQESTLSDDSTPPSSSPK.I   | 1            | SAM14_HUMAN          |
| Q8IZD0                                                                                | 2             | 2.7              | R.DSASSAEDGEGSDGPGGK.V     | 1            | SAM14_HUMAN          |
| <b><i>Sterile alpha motif domain-containing protein 9 - Homo sapiens (Human)</i></b>  |               |                  |                            |              |                      |
| Q5K651                                                                                | 3             | 4.1748           | K.EHLVDMGITHGPAIQIEELFK.E  | 2            | SAMD9_HUMAN          |
| Q5K651                                                                                | 3             | 4.6187           | K.HREILTEQDVNGAVLK.W       | 2            | SAMD9_HUMAN          |
| Q5K651                                                                                | 2             | 3.3854           | K.TAIEDSIQTSK.M            | 3            | SAMD9_HUMAN          |
| <b><i>Steroid receptor RNA activator 1 - Homo sapiens (Human)</i></b>                 |               |                  |                            |              |                      |
| Q9HD15                                                                                | 2             | 2.9548           | K.RVAAPQDGSPR.V            | 2            | SRA1_HUMAN           |
| Q9HD15                                                                                | 2             | 3.2296           | R.SLFSEEAAANEEK.S          | 2            | SRA1_HUMAN           |
| Q9HD15                                                                                | 3             | 4.7907           | R.VPASETSPGPPPM#GPPPPSSK.A | 2            | SRA1_HUMAN           |
| Q9HD15                                                                                | 2             | 4.739            | R.VPASETSPGPPPMGPPPPSSK.A  | 3            | SRA1_HUMAN           |
| <b><i>STIP1 homology and U box-containing protein 1 - Homo sapiens (Human)</i></b>    |               |                  |                            |              |                      |
| Q9UNE7                                                                                | 2             | 2.7757           | R.LGAGGGSPEK.S             | 2            | STUB1_HUMAN          |
| Q9UNE7                                                                                | 3             | 3.8601           | R.NHEGDEDDSHVR.A           | 3            | STUB1_HUMAN          |
| <b><i>Stomatin-like protein 2 - Homo sapiens (Human)</i></b>                          |               |                  |                            |              |                      |
| Q9UJZ1                                                                                | 2             | 2.9265           | R.DVQGTASLDEELDRVK.M       | 1            | STML2_HUMAN          |
| <b><i>Stress-70 protein, mitochondrial precursor - Homo sapiens (Human)</i></b>       |               |                  |                            |              |                      |
| P38646                                                                                | 2             | 3.2762           | K.DSETGENIR.Q              | 1            | GRP75_HUMAN          |
| P38646                                                                                | 2             | 3.1976           | K.VLENAEGAR.T              | 2            | GRP75_HUMAN          |
| P38646                                                                                | 2             | 3.2353           | K.VQQTVDLDFGR.A            | 2            | GRP75_HUMAN          |
| P38646                                                                                | 2             | 3.4594           | R.AQFEGIVTDLIR.R           | 1            | GRP75_HUMAN          |
| P38646                                                                                | 2             | 3.165            | R.KDSETGENIR.Q             | 2            | GRP75_HUMAN          |
| P38646                                                                                | 2             | 2.8627           | R.RYDDPEVQK.D              | 1            | GRP75_HUMAN          |
| P38646                                                                                | 2             | 3.0178           | R.TTPSVVAFTADGER.L         | 1            | GRP75_HUMAN          |

| <i>Accession No*</i>                                                                                          | <i>Charge</i> | <i>XC(Max)**</i> | <i>Peptide*</i>                     | <i>TC***</i> | <i>Reference No*</i> |
|---------------------------------------------------------------------------------------------------------------|---------------|------------------|-------------------------------------|--------------|----------------------|
| <b><i>Stress-induced-phosphoprotein 1 - Homo sapiens (Human)</i></b>                                          |               |                  |                                     |              |                      |
| P31948                                                                                                        | 2             | 3.6668           | K.AAALEFLNR.F                       | 2            | STIP1_HUMAN          |
| P31948                                                                                                        | 2             | 3.4672           | K.AAALEFLNRFEEAK.R                  | 1            | STIP1_HUMAN          |
| <b><i>Stromal interaction molecule 1 precursor - Homo sapiens (Human)</i></b>                                 |               |                  |                                     |              |                      |
| Q13586                                                                                                        | 3             | 3.7472           | R.DLTHSDSESSLHMSDR.Q                | 1            | STIM1_HUMAN          |
| Q13586                                                                                                        | 3             | 5.116            | R.LIEGVHPGSLVEKLPDSPALAK.K          | 1            | STIM1_HUMAN          |
| Q13586                                                                                                        | 2             | 4.3127           | R.SHSPSPDPDTPSPVGDSR.A              | 4            | STIM1_HUMAN          |
| Q13586                                                                                                        | 3             | 4.2892           | K.KAVAEEDNGSIGEETDSSPGR.K           | 2            | STIM1_HUMAN          |
| <b><i>Structural maintenance of chromosomes protein 1A - Homo sapiens (Human)</i></b>                         |               |                  |                                     |              |                      |
| Q14683                                                                                                        | 2             | 3.3034           | R.MEEESQSQGR.D                      | 2            | SMC1A_HUMAN          |
| <b><i>Structural maintenance of chromosomes protein 5 - Homo sapiens (Human)</i></b>                          |               |                  |                                     |              |                      |
| Q8IY18                                                                                                        | 2             | 2.7658           | R.DPSSEVPSK.R                       | 1            | SMC5_HUMAN           |
| <b><i>Succinyl-CoA ligase [ADP-forming] beta-chain, mitochondrial precursor - Homo sapiens (Human)</i></b>    |               |                  |                                     |              |                      |
| Q9P2R7                                                                                                        | 2             | 3.1193           | K.SPDEAYAIK.K                       | 1            | SUCB1_HUMAN          |
| <b><i>Succinyl-CoA ligase [GDP-forming] beta-chain, mitochondrial precursor - Homo sapiens (Human)</i></b>    |               |                  |                                     |              |                      |
| Q96199                                                                                                        | 2             | 4.5516           | R.FFVADTANEALEAAK.R                 | 3            | SUCB2_HUMAN          |
| <b><i>Succinyl-CoA ligase [GDP-forming] subunit alpha, mitochondrial precursor - Homo sapiens (Human)</i></b> |               |                  |                                     |              |                      |
| P53597                                                                                                        | 3             | 3.8978           | K.ISALQSAGVVSM#SPAQLGTTIYKEFEK.R    | 1            | SUCA_HUMAN           |
| <b><i>Sulfatase-modifying factor 2 precursor - Homo sapiens (Human)</i></b>                                   |               |                  |                                     |              |                      |
| Q8NBJ7                                                                                                        | 2             | 3.2593           | R.MGNTPDSASDNLGFR.C                 | 1            | SUMF2_HUMAN          |
| Q8NBJ7                                                                                                        | 2             | 3.2354           | K.SVLWWLPVEK.A                      | 1            | SUMF2_HUMAN          |
| Q8NBJ7                                                                                                        | 2             | 3.8624           | R.LPTEEEWEFAAR.G                    | 2            | SUMF2_HUMAN          |
| <b><i>Superoxide dismutase [Cu-Zn] - Homo sapiens (Human)</i></b>                                             |               |                  |                                     |              |                      |
| P00441                                                                                                        | 3             | 9.3334           | K.GLTEGLHGFHVHEFGDNTAGCTSAGPHFNPL   | 60           | SODC_HUMAN           |
| P00441                                                                                                        | 3             | 6.8109           | R.TLVVHEKADDLGKGGNEESTK.T           | 7            | SODC_HUMAN           |
| P00441                                                                                                        | 2             | 4.8468           | R.TLVVHEKADDLGK.G                   | 5            | SODC_HUMAN           |
| P00441                                                                                                        | 1             | 2.7661           | R.LACGVIGIAQ.-                      | 9            | SODC_HUMAN           |
| P00441                                                                                                        | 1             | 2.2613           | K.VWGSIK.G                          | 5            | SODC_HUMAN           |
| P00441                                                                                                        | 2             | 3.7954           | R.HVGD LGNVTADK.D                   | 2            | SODC_HUMAN           |
| P00441                                                                                                        | 3             | 5.164            | K.GLTEGLHGFHVHEFGDNTAGCTSAGPHFNPL   | 1            | SODC_HUMAN           |
| P00441                                                                                                        | 3             | 5.2402           | K.ADDLGKGGNEESTKTGNAGSR.L           | 4            | SODC_HUMAN           |
| P00441                                                                                                        | 4             | 7.9798           | R.HVGD LGNVTADKDG VADVSIEDSVISLSGDH | 4            | SODC_HUMAN           |
| P00441                                                                                                        | 2             | 4.3014           | K.ADDLGKGGNEESTK.T                  | 28           | SODC_HUMAN           |
| P00441                                                                                                        | 3             | 6.2233           | K.AVCVLKGDGPVQGIINFEQK.E            | 54           | SODC_HUMAN           |
| P00441                                                                                                        | 4             | 5.4549           | K.AVCVLKGDGPVQGIINFEQKESNGPVK.V     | 4            | SODC_HUMAN           |

| <i>Accession No*</i>                                                                                           | <i>Charge</i> | <i>XC(Max)**</i> | <i>Peptide*</i>                   | <i>TC***</i> | <i>Reference No*</i> |
|----------------------------------------------------------------------------------------------------------------|---------------|------------------|-----------------------------------|--------------|----------------------|
| P00441                                                                                                         | 2             | 3.4697           | K.ESNGPVKVGWGSIK.G                | 5            | SODC_HUMAN           |
| P00441                                                                                                         | 3             | 7.7668           | K.GLTEGLHGFHVHEFGDNTAGC*TSAGPHFNP | 4            | SODC_HUMAN           |
| P00441                                                                                                         | 2             | 4.6622           | K.GDGPVQGGIINFEQK.E               | 11           | SODC_HUMAN           |
| P00441                                                                                                         | 2             | 4.7785           | K.GDGPVQGGIINFEQKESNGPVK.V        | 3            | SODC_HUMAN           |
| <b><i>Supervillin - Homo sapiens (Human)</i></b>                                                               |               |                  |                                   |              |                      |
| O95425                                                                                                         | 2             | 3.5785           | R.RGQELSATR.Q                     | 5            | SVIL_HUMAN           |
| O95425                                                                                                         | 2             | 3.7804           | K.TPTGEGLLDPSK.T                  | 2            | SVIL_HUMAN           |
| O95425                                                                                                         | 2             | 4.7138           | R.SNEEEETSDDSLEK.Q                | 9            | SVIL_HUMAN           |
| O95425                                                                                                         | 2             | 3.5417           | R.NSPELASESVTQR.R                 | 2            | SVIL_HUMAN           |
| O95425                                                                                                         | 2             | 3.5949           | R.DASSLYPGTETMGLR.T               | 3            | SVIL_HUMAN           |
| O95425                                                                                                         | 2             | 3.5401           | R.DASSLYPGTETM#GLR.T              | 1            | SVIL_HUMAN           |
| O95425                                                                                                         | 2             | 4.4822           | R.YQTQPVTLGEVEQVQSGK.L            | 3            | SVIL_HUMAN           |
| O95425                                                                                                         | 2             | 4.1783           | K.SQAWQPLVEGSENK.G                | 2            | SVIL_HUMAN           |
| O95425                                                                                                         | 2             | 2.7524           | K.SFDEQNVPK.R                     | 1            | SVIL_HUMAN           |
| O95425                                                                                                         | 2             | 2.9382           | K.MNAQGNLDR.D                     | 2            | SVIL_HUMAN           |
| O95425                                                                                                         | 2             | 2.791            | R.SPVEDDFVIFDPYAPK.L              | 1            | SVIL_HUMAN           |
| O95425                                                                                                         | 3             | 4.0562           | K.HAHSSSLQQAASR.S                 | 3            | SVIL_HUMAN           |
| O95425                                                                                                         | 2             | 3.651            | K.FSSSIENS DSPVR.S                | 2            | SVIL_HUMAN           |
| O95425                                                                                                         | 3             | 5.088            | K.DQTNEGKELAEQGEPDSSSTLSLAEK.L    | 1            | SVIL_HUMAN           |
| O95425                                                                                                         | 2             | 3.2456           | K.TLLALEGDGLVR.S                  | 1            | SVIL_HUMAN           |
| <b><i>Suppressor of hairy wing homolog 4 - Homo sapiens (Human)</i></b>                                        |               |                  |                                   |              |                      |
| Q6N043                                                                                                         | 2             | 2.9254           | K.SNTSKPNTIKSNASK.P               | 4            | SUHW4_HUMAN          |
| <b><i>Surfeit locus protein 6 - Homo sapiens (Human)</i></b>                                                   |               |                  |                                   |              |                      |
| O75683                                                                                                         | 2             | 3.5977           | K.TQGSETAGPPK.K                   | 3            | SURF6_HUMAN          |
| <b><i>Survival motor neuron protein - Homo sapiens (Human)</i></b>                                             |               |                  |                                   |              |                      |
| Q16637                                                                                                         | 2             | 3.2179           | R.GTQSQSDSDIWDDTALIK.A            | 1            | SMN_HUMAN            |
| <b><i>Survival of motor neuron-related-splicing factor 30 - Homo sapiens (Human)</i></b>                       |               |                  |                                   |              |                      |
| O75940                                                                                                         | 2             | 4.0709           | K.RSIFASPESVTGK.V                 | 1            | SPF30_HUMAN          |
| O75940                                                                                                         | 2             | 3.0176           | R.SIFASPESVTGK.V                  | 3            | SPF30_HUMAN          |
| O75940                                                                                                         | 2             | 2.9024           | K.KEMIAQQR.E                      | 2            | SPF30_HUMAN          |
| <b><i>SUV3-like protein 1 - Homo sapiens (Human)</i></b>                                                       |               |                  |                                   |              |                      |
| O43630                                                                                                         | 2             | 2.8646           | R.LVQQGLLTPDMLK.Q                 | 1            | O43630_HUMAN         |
| <b><i>SWI/SNF-related matrix-associated actin-dependent regulator of chromatin subfamily A containin</i></b>   |               |                  |                                   |              |                      |
| Q9H4L7                                                                                                         | 3             | 6.4181           | R.RNDDISELEDLSELEDLKDAK.L         | 2            | SMRCD_HUMAN          |
| <b><i>SWI/SNF-related matrix-associated actin-dependent regulator of chromatin subfamily A-like protei</i></b> |               |                  |                                   |              |                      |

| <i>Accession No*</i>                                                    | <i>Charge</i> | <i>XC(Max)**</i> | <i>Peptide*</i>                    | <i>TC***</i> | <i>Reference No*</i> |
|-------------------------------------------------------------------------|---------------|------------------|------------------------------------|--------------|----------------------|
| Q9NZC9                                                                  | 2             | 2.9217           | K.LLAEQHQR.T                       | 2            | SMAL1_HUMAN          |
| Q9NZC9                                                                  | 2             | 4.0084           | R.TSSGTSIAGNPFQAK.Q                | 2            | SMAL1_HUMAN          |
| <b><i>Switch-associated protein 70 - Homo sapiens (Human)</i></b>       |               |                  |                                    |              |                      |
| Q9UH65                                                                  | 2             | 3.1339           | K.SSELEQYLQR.V                     | 1            | SWP70_HUMAN          |
| <b><i>Synaptophysin-like protein 1 - Homo sapiens (Human)</i></b>       |               |                  |                                    |              |                      |
| Q16563                                                                  | 2             | 3.2369           | K.TVTATFGYPFR.L                    | 1            | SYPL1_HUMAN          |
| <b><i>Synaptopodin - Homo sapiens (Human)</i></b>                       |               |                  |                                    |              |                      |
| Q8N3V7                                                                  | 2             | 4.1811           | K.TGILEESMAR.R                     | 4            | SYNPO_HUMAN          |
| Q8N3V7                                                                  | 2             | 4.8741           | R.SPSPYSVLYPSSDPK.S                | 2            | SYNPO_HUMAN          |
| Q8N3V7                                                                  | 3             | 7.4243           | R.QRDQGEVGVVEEPPFALGAEASNFQQEPAPR. | 2            | SYNPO_HUMAN          |
| Q8N3V7                                                                  | 3             | 3.9934           | R.KSMFTFVEKPK.V                    | 3            | SYNPO_HUMAN          |
| Q8N3V7                                                                  | 2             | 4.4658           | R.AASPAKPSLDDLVPNLPK.G             | 5            | SYNPO_HUMAN          |
| Q8N3V7                                                                  | 2             | 4.5654           | K.YVIESSSHTPELAR.C                 | 2            | SYNPO_HUMAN          |
| Q8N3V7                                                                  | 2             | 5.2617           | R.TARPFGIQAPGGTSQMER.S             | 4            | SYNPO_HUMAN          |
| Q8N3V7                                                                  | 2             | 2.7583           | K.TGILEESM#AR.R                    | 1            | SYNPO_HUMAN          |
| Q8N3V7                                                                  | 2             | 2.7258           | K.SMFTFVEKPK.V                     | 1            | SYNPO_HUMAN          |
| Q8N3V7                                                                  | 2             | 3.8796           | K.PKPNQLSEASGK.G                   | 4            | SYNPO_HUMAN          |
| Q8N3V7                                                                  | 2             | 3.9738           | K.ENAALLTANGLHLSQNR.E              | 2            | SYNPO_HUMAN          |
| Q8N3V7                                                                  | 2             | 3.2206           | K.APAPQPPSLPDR.S                   | 2            | SYNPO_HUMAN          |
| Q8N3V7                                                                  | 2             | 2.8541           | K.YPTNAPGAFR.V                     | 2            | SYNPO_HUMAN          |
| Q8N3V7                                                                  | 2             | 3.0536           | K.VASEEEEEVPLVVYLK.E               | 1            | SYNPO_HUMAN          |
| <b><i>Synaptopodin-2 - Homo sapiens (Human)</i></b>                     |               |                  |                                    |              |                      |
| Q9UMS6                                                                  | 2             | 3.2743           | K.VNSALAM#K.Q                      | 2            | SYNP2_HUMAN          |
| Q9UMS6                                                                  | 2             | 3.7618           | R.VIQESEAGDAGLPR.V                 | 1            | SYNP2_HUMAN          |
| Q9UMS6                                                                  | 2             | 3.5867           | R.TGILQEAK.R                       | 1            | SYNP2_HUMAN          |
| Q9UMS6                                                                  | 1             | 2.1811           | R.GAQLFAK.R                        | 2            | SYNP2_HUMAN          |
| Q9UMS6                                                                  | 2             | 3.3979           | R.AQSPTPSLPASWK.Y                  | 1            | SYNP2_HUMAN          |
| Q9UMS6                                                                  | 2             | 4.6411           | R.APPPVAYNPIHSPSYPLAALK.S          | 2            | SYNP2_HUMAN          |
| Q9UMS6                                                                  | 2             | 4.0724           | K.VSPNPELLSLLQNSEGK.R              | 3            | SYNP2_HUMAN          |
| Q9UMS6                                                                  | 1             | 2.1014           | K.VNSALAMK.Q                       | 1            | SYNP2_HUMAN          |
| Q9UMS6                                                                  | 2             | 3.3942           | K.SGVTIQVWKPSVVEE.-                | 1            | SYNP2_HUMAN          |
| Q9UMS6                                                                  | 4             | 6.0951           | K.GPQAAVASQNYTPKPTVSTPTVNAVQPGAV   | 1            | SYNP2_HUMAN          |
| Q9UMS6                                                                  | 2             | 3.146            | K.VSPNPELLSLLQNSEGK.R              | 3            | SYNP2_HUMAN          |
| <b><i>Synaptosomal-associated protein 23 - Homo sapiens (Human)</i></b> |               |                  |                                    |              |                      |
| O00161                                                                  | 2             | 4.6368           | R.ILGLAIESQDAGIK.T                 | 1            | SNP23_HUMAN          |

| <i>Accession No*</i>                                                    | <i>Charge</i> | <i>XC(Max)**</i> | <i>Peptide*</i>           | <i>TC***</i> | <i>Reference No*</i> |
|-------------------------------------------------------------------------|---------------|------------------|---------------------------|--------------|----------------------|
| O00161                                                                  | 3             | 5.8733           | K.DMALNIGNEIDAQNPQIK.R    | 2            | SNP23_HUMAN          |
| O00161                                                                  | 3             | 4.2794           | K.DMALNIGNEIDAQNPQIKR.I   | 1            | SNP23_HUMAN          |
| <b><i>Synaptosomal-associated protein 25 - Homo sapiens (Human)</i></b> |               |                  |                           |              |                      |
| P60880                                                                  | 3             | 4.3084           | R.RADQLADESLESTRR.M       | 2            | SNP25_HUMAN          |
| <b><i>Synaptosomal-associated protein 29 - Homo sapiens (Human)</i></b> |               |                  |                           |              |                      |
| O95721                                                                  | 2             | 3.5302           | K.EAISTSKEQEAQ.Y          | 2            | SNP29_HUMAN          |
| O95721                                                                  | 2             | 3.3089           | K.VGVASSEELAR.Q           | 2            | SNP29_HUMAN          |
| <b><i>Synaptotagmin-like protein 2 - Homo sapiens (Human)</i></b>       |               |                  |                           |              |                      |
| Q9HCH5                                                                  | 2             | 3.192            | K.LPEGHSSQQTK.N           | 2            | SYTL2_HUMAN          |
| Q9HCH5                                                                  | 2             | 3.8067           | K.STVADTSIQKLEK.S         | 1            | SYTL2_HUMAN          |
| Q9HCH5                                                                  | 2             | 2.7136           | R.DRQQGSEEEPSVLK.T        | 1            | SYTL2_HUMAN          |
| Q9HCH5                                                                  | 3             | 3.7277           | R.KPSLFHQSTSSPYVSK.S      | 1            | SYTL2_HUMAN          |
| <b><i>Synaptotagmin-like protein 4 - Homo sapiens (Human)</i></b>       |               |                  |                           |              |                      |
| Q96C24                                                                  | 2             | 3.3047           | K.SALEAESESLDSFTADSDSTR.R | 1            | SYTL4_HUMAN          |
| <b><i>Syndecan-1 precursor - Homo sapiens (Human)</i></b>               |               |                  |                           |              |                      |
| P18827                                                                  | 2             | 4.2274           | K.EGEAVVLPEVEPGLTAR.E     | 2            | SDC1_HUMAN           |
| <b><i>Syndecan-4 precursor - Homo sapiens (Human)</i></b>               |               |                  |                           |              |                      |
| P31431                                                                  | 2             | 3.5786           | K.KLEENEVIPK.R            | 5            | SDC4_HUMAN           |
| P31431                                                                  | 2             | 3.4              | R.AGSGSQVPTPEK.K          | 2            | SDC4_HUMAN           |
| P31431                                                                  | 2             | 2.8248           | R.ISPVEESEDVSNK.V         | 1            | SDC4_HUMAN           |
| <b><i>Syntaxin-3 - Homo sapiens (Human)</i></b>                         |               |                  |                           |              |                      |
| Q13277                                                                  | 2             | 2.7569           | K.HIEEDEV.R.S             | 1            | STX3_HUMAN           |
| Q13277                                                                  | 2             | 3.732            | K.LYSIILSAPIPEPK.T        | 3            | STX3_HUMAN           |
| <b><i>Syntaxin-6 - Homo sapiens (Human)</i></b>                         |               |                  |                           |              |                      |
| O43752                                                                  | 2             | 3.216            | K.AVNTAQGLFQR.W           | 2            | STX6_HUMAN           |
| <b><i>Syntaxin-7 - Homo sapiens (Human)</i></b>                         |               |                  |                           |              |                      |
| O15400                                                                  | 2             | 3.2724           | R.VSGSFPEDSSKER.N         | 2            | STX7_HUMAN           |
| O15400                                                                  | 3             | 3.8269           | K.ETDKYIKEFGSLPTTPSEQR.Q  | 1            | STX7_HUMAN           |
| O15400                                                                  | 2             | 3.232            | K.ITQCSVEIQR.T            | 2            | STX7_HUMAN           |
| O15400                                                                  | 1             | 2.3042           | R.ISSNIQK.I               | 3            | STX7_HUMAN           |
| O15400                                                                  | 2             | 4.9416           | R.LVAEFTTSLTNFQK.V        | 5            | STX7_HUMAN           |
| O15400                                                                  | 2             | 2.7772           | R.TLNQLGTPQDSPELR.Q       | 1            | STX7_HUMAN           |
| <b><i>Syntaxin-binding protein 3 - Homo sapiens (Human)</i></b>         |               |                  |                           |              |                      |
| O00186                                                                  | 2             | 3.4457           | K.TLSALTQLMK.K            | 1            | STXB3_HUMAN          |
| <b><i>Talin-1 - Homo sapiens (Human)</i></b>                            |               |                  |                           |              |                      |

| <i>Accession No*</i>                                                                | <i>Charge</i> | <i>XC(Max)**</i> | <i>Peptide*</i>                    | <i>TC***</i> | <i>Reference No*</i> |
|-------------------------------------------------------------------------------------|---------------|------------------|------------------------------------|--------------|----------------------|
| Q9Y490                                                                              | 3             | 4.6592           | R.SGASGPENFQVGSMS#PPAQQQITSGQM#HR. | 1            | TLN1_HUMAN           |
| Q9Y490                                                                              | 2             | 3.8294           | K.ADAEGESDLENSR.K                  | 2            | TLN1_HUMAN           |
| Q9Y490                                                                              | 3             | 5.8393           | R.SGASGPENFQVGSMS#PPAQQQITSGQMHR.  | 2            | TLN1_HUMAN           |
| Q9Y490                                                                              | 2             | 3.5981           | K.TLAESALQLLYTAK.E                 | 1            | TLN1_HUMAN           |
| Q9Y490                                                                              | 3             | 3.9906           | K.QAAASATQTIAAAQHAASTPK.A          | 1            | TLN1_HUMAN           |
| Q9Y490                                                                              | 2             | 3.6933           | K.MVGGIAQIIAAQEEMLR.K              | 1            | TLN1_HUMAN           |
| Q9Y490                                                                              | 2             | 4.3273           | K.KSTVLQQQYNR.V                    | 1            | TLN1_HUMAN           |
| Q9Y490                                                                              | 2             | 3.9715           | K.GAAAHDPDSEEQQQR.L                | 3            | TLN1_HUMAN           |
| Q9Y490                                                                              | 2             | 2.7099           | K.EADESLNFEEQILEAAK.S              | 1            | TLN1_HUMAN           |
| Q9Y490                                                                              | 3             | 4.3426           | R.VGKVEHGSVALPAIMR.S               | 1            | TLN1_HUMAN           |
| <b><i>Target of myb1 - Homo sapiens (Human)</i></b>                                 |               |                  |                                    |              |                      |
| Q86X74                                                                              | 3             | 7.2495           | K.AADRLPNLSSPSAEGPPGPPSPAPR.K      | 4            | Q86X74_HUMAN         |
| Q86X74                                                                              | 3             | 4.4278           | K.EVKYEAPQATDGLAGALDAR.Q           | 6            | Q86X74_HUMAN         |
| Q86X74                                                                              | 2             | 3.1424           | K.TQEKKDDMLFAL.-                   | 2            | Q86X74_HUMAN         |
| Q86X74                                                                              | 2             | 4.0561           | K.YEAPQATDGLAGALDAR.Q              | 3            | Q86X74_HUMAN         |
| Q86X74                                                                              | 2             | 3.188            | R.LEDEFDMFALTR.G                   | 2            | Q86X74_HUMAN         |
| <b><i>TATA element modulatory factor - Homo sapiens (Human)</i></b>                 |               |                  |                                    |              |                      |
| P82094                                                                              | 2             | 2.8381           | K.SPVVSKPPAK.S                     | 1            | TMF1_HUMAN           |
| P82094                                                                              | 2             | 2.8727           | R.TPETTESQVK.D                     | 2            | TMF1_HUMAN           |
| P82094                                                                              | 3             | 4.5651           | R.QIENLQATLGSQTSSWEKLEK.N          | 2            | TMF1_HUMAN           |
| P82094                                                                              | 3             | 3.7053           | R.AKDKENENMVAK.L                   | 1            | TMF1_HUMAN           |
| P82094                                                                              | 2             | 3.2231           | K.IQMSSMESQNSLLR.Q                 | 2            | TMF1_HUMAN           |
| P82094                                                                              | 2             | 3.6341           | K.DSEAQAALSR.E                     | 1            | TMF1_HUMAN           |
| P82094                                                                              | 2             | 3.2515           | K.TLLNSQLEMER.M                    | 2            | TMF1_HUMAN           |
| <b><i>TATA-binding protein-associated factor 2N - Homo sapiens (Human)</i></b>      |               |                  |                                    |              |                      |
| Q92804                                                                              | 2             | 3.7585           | K.AAIDWFDGKEFHGNIK.V               | 2            | RBP56_HUMAN          |
| Q92804                                                                              | 3             | 4.0797           | K.QSSYSQQPYNNQGGQQNM#ESSGSQGGR.    | 1            | RBP56_HUMAN          |
| Q92804                                                                              | 3             | 4.9819           | R.YGEDNRGYGGSQGGGR.G               | 1            | RBP56_HUMAN          |
| <b><i>TATA-binding protein-associated phosphoprotein - Homo sapiens (Human)</i></b> |               |                  |                                    |              |                      |
| Q01658                                                                              | 2             | 2.9413           | R.LENLGIPEEELLRQQQELFAK.A          | 1            | TBAP_HUMAN           |
| <b><i>Tax1-binding protein 3 - Homo sapiens (Human)</i></b>                         |               |                  |                                    |              |                      |
| O14907                                                                              | 2             | 5.0872           | R.VSEGGPAEIALQLQIGDK.I             | 2            | TX1B3_HUMAN          |
| <b><i>TBC1 domain family member 1 - Homo sapiens (Human)</i></b>                    |               |                  |                                    |              |                      |
| Q86TI0                                                                              | 2             | 3.7559           | R.SLTESLESILSR.G                   | 1            | TBCD1_HUMAN          |
| <b><i>TBC1 domain family member 10A - Homo sapiens (Human)</i></b>                  |               |                  |                                    |              |                      |

| <i>Accession No*</i>                                                                         | <i>Charge</i> | <i>XC(Max)**</i> | <i>Peptide*</i>                    | <i>TC***</i> | <i>Reference No*</i> |
|----------------------------------------------------------------------------------------------|---------------|------------------|------------------------------------|--------------|----------------------|
| Q9BXI6                                                                                       | 2             | 2.8166           | R.APAAGESLSGTR.E                   | 2            | TB10A_HUMAN          |
| <b><i>TBC1 domain family member 12 - Homo sapiens (Human)</i></b>                            |               |                  |                                    |              |                      |
| O60347                                                                                       | 3             | 4.6057           | R.LRLEPGDEDEDAGAGSPSDWASPLEDPLR.S  | 1            | TBC12_HUMAN          |
| <b><i>TBC1 domain family member 22B - Homo sapiens (Human)</i></b>                           |               |                  |                                    |              |                      |
| Q9NU19                                                                                       | 2             | 2.7842           | R.SQSTTSVDPANYK.V                  | 1            | TB22B_HUMAN          |
| <b><i>TBC1 domain family member 5 - Homo sapiens (Human)</i></b>                             |               |                  |                                    |              |                      |
| Q92609                                                                                       | 2             | 3.1244           | K.VSNSLINFGR.K                     | 2            | TBCD5_HUMAN          |
| Q92609                                                                                       | 2             | 3.4493           | R.GQGQSVQM#SGAIK.Q                 | 1            | TBCD5_HUMAN          |
| Q92609                                                                                       | 2             | 4.7107           | R.GQGQSVQM#SGAIK.Q                 | 2            | TBCD5_HUMAN          |
| Q92609                                                                                       | 2             | 3.5205           | R.GSFSGQAQPLR.T                    | 5            | TBCD5_HUMAN          |
| Q92609                                                                                       | 3             | 3.9195           | R.KLISPAM#APGSAGGPVPGGNSSSSSSSVVIP | 1            | TBCD5_HUMAN          |
| Q92609                                                                                       | 3             | 4.1952           | R.TSAEAPSHHLQQQQQQQR.L             | 2            | TBCD5_HUMAN          |
| <b><i>T-box transcription factor TBX2 - Homo sapiens (Human)</i></b>                         |               |                  |                                    |              |                      |
| Q13207                                                                                       | 2             | 2.9936           | R.LVSGLESQR.A                      | 2            | TBX2_HUMAN           |
| <b><i>T-cell surface antigen CD2 precursor - Homo sapiens (Human)</i></b>                    |               |                  |                                    |              |                      |
| P06729                                                                                       | 2             | 2.9653           | R.VQPKPPHGAAENSLSPSSN.-            | 1            | CD2_HUMAN            |
| P06729                                                                                       | 3             | 5.1542           | K.RPPAPSGTQVHQQK.G                 | 3            | CD2_HUMAN            |
| <b><i>T-complex protein 1 subunit alpha - Homo sapiens (Human)</i></b>                       |               |                  |                                    |              |                      |
| P17987                                                                                       | 2             | 4.4343           | R.SQNVMAAASIANIVK.S                | 4            | TCPA_HUMAN           |
| <b><i>T-complex protein 1 subunit delta - Homo sapiens (Human)</i></b>                       |               |                  |                                    |              |                      |
| P50991                                                                                       | 1             | 2.5976           | R.FSNISAAK.A                       | 4            | TCPD_HUMAN           |
| <b><i>TDP43 - Homo sapiens (Human)</i></b>                                                   |               |                  |                                    |              |                      |
| A4GUK4                                                                                       | 2             | 4.8251           | R.FGGNPGFGNQGGFGNSR.G              | 2            | A4GUK4_HUMA          |
| <b><i>Telomerase-binding protein EST1A - Homo sapiens (Human)</i></b>                        |               |                  |                                    |              |                      |
| Q86US8                                                                                       | 2             | 3.7779           | R.GILATLAPQAGSR.E                  | 1            | EST1A_HUMAN          |
| <b><i>Telomeric repeat-binding factor 2 - Homo sapiens (Human)</i></b>                       |               |                  |                                    |              |                      |
| Q15554                                                                                       | 2             | 3.3549           | K.YGEGNWA AISK.N                   | 2            | TERF2_HUMAN          |
| <b><i>Telomeric repeat-binding factor 2-interacting protein 1 - Homo sapiens (Human)</i></b> |               |                  |                                    |              |                      |
| Q9NYB0                                                                                       | 2             | 3.1089           | K.FGAQNVAR.R                       | 4            | TE2IP_HUMAN          |
| Q9NYB0                                                                                       | 2             | 4.2083           | R.SPSSVTGNALWK.A                   | 6            | TE2IP_HUMAN          |
| Q9NYB0                                                                                       | 3             | 4.4474           | R.LGPASAAADTGSEAKPGALAEAAEPEPQR.H  | 2            | TE2IP_HUMAN          |
| Q9NYB0                                                                                       | 3             | 4.2286           | R.KAEEDPEAADSGEPQNK.R              | 3            | TE2IP_HUMAN          |
| Q9NYB0                                                                                       | 2             | 2.9105           | R.ADGYPIWSR.Q                      | 1            | TE2IP_HUMAN          |
| Q9NYB0                                                                                       | 2             | 4.9813           | K.FNLDLSTVTQAFK.N                  | 3            | TE2IP_HUMAN          |
| Q9NYB0                                                                                       | 2             | 3.6528           | K.AEEDPEAADSGEPQNK.R               | 1            | TE2IP_HUMAN          |



| <i>Accession No*</i>                                    | <i>Charge</i> | <i>XC(Max)**</i> | <i>Peptide*</i>                  | <i>TC***</i> | <i>Reference No*</i> |
|---------------------------------------------------------|---------------|------------------|----------------------------------|--------------|----------------------|
| Q9NYB0                                                  | 2             | 3.1404           | K.NSGELEATS AFLASGQR.A           | 1            | TE2IP_HUMAN          |
| <b><i>Tenascin precursor - Homo sapiens (Human)</i></b> |               |                  |                                  |              |                      |
| P24821                                                  | 2             | 3.7809           | R.GLEPGQEYNVLLTAEK.G             | 4            | TENA_HUMAN           |
| P24821                                                  | 2             | 3.1783           | R.RPETSYSR.Q                     | 3            | TENA_HUMAN           |
| P24821                                                  | 2             | 3.2424           | R.RGDMSSNPAK.E                   | 10           | TENA_HUMAN           |
| P24821                                                  | 2             | 4.5998           | R.VPGDQTSTIIQELEPGVEYFIR.V       | 3            | TENA_HUMAN           |
| P24821                                                  | 2             | 4.1311           | K.YAPISGGDHAEDVDPK.S             | 3            | TENA_HUMAN           |
| P24821                                                  | 2             | 3.0821           | K.ETFTTGLDAPR.N                  | 1            | TENA_HUMAN           |
| P24821                                                  | 2             | 3.5454           | K.AATPYTVSIYGVIIQGYR.T           | 2            | TENA_HUMAN           |
| P24821                                                  | 2             | 4.155            | R.LEELENLVSSLR.E                 | 2            | TENA_HUMAN           |
| P24821                                                  | 2             | 4.136            | R.NMNKEDEGEITK.S                 | 3            | TENA_HUMAN           |
| <b><i>Teneurin-3 - Homo sapiens (Human)</i></b>         |               |                  |                                  |              |                      |
| Q9P273                                                  | 2             | 3.0563           | R.QDGMFDLVANGGASLTLVFER.S        | 1            | TEN3_HUMAN           |
| <b><i>Tensin-1 - Homo sapiens (Human)</i></b>           |               |                  |                                  |              |                      |
| Q9HBL0                                                  | 2             | 2.7369           | R.SYVESVAR.T                     | 1            | TENS1_HUMAN          |
| Q9HBL0                                                  | 3             | 4.0545           | R.HPGAHQGNLASGLHSNAIASPGSPSLGR.H | 1            | TENS1_HUMAN          |
| Q9HBL0                                                  | 2             | 2.8897           | R.VAGVQAR.E                      | 4            | TENS1_HUMAN          |
| Q9HBL0                                                  | 2             | 3.3156           | R.LLSGFGLER.E                    | 2            | TENS1_HUMAN          |
| Q9HBL0                                                  | 2             | 3.7477           | R.HVAYGGYSTPEDR.R                | 2            | TENS1_HUMAN          |
| Q9HBL0                                                  | 2             | 5.4605           | R.RAASDGQYENQSPEATSPR.S          | 3            | TENS1_HUMAN          |
| Q9HBL0                                                  | 2             | 3.3775           | R.SGSLGQPSAQR.N                  | 3            | TENS1_HUMAN          |
| Q9HBL0                                                  | 2             | 4.6059           | R.SGYIPSGHSLGTPEPAPR.A           | 5            | TENS1_HUMAN          |
| Q9HBL0                                                  | 2             | 3.3804           | R.SRPAGGSAVPSSGR.H               | 6            | TENS1_HUMAN          |
| Q9HBL0                                                  | 3             | 5.032            | R.TPEEEPLNLEGLVAHR.V             | 5            | TENS1_HUMAN          |
| Q9HBL0                                                  | 2             | 3.6088           | R.TPTQPLLESFGR.S                 | 7            | TENS1_HUMAN          |
| Q9HBL0                                                  | 2             | 3.7151           | R.TVGTNTPPSPGFGR.R               | 4            | TENS1_HUMAN          |
| Q9HBL0                                                  | 2             | 5.766            | R.HPAGVYQVSGLHVK.V               | 5            | TENS1_HUMAN          |
| Q9HBL0                                                  | 2             | 4.0433           | R.SQSFSEAEPLPPAPVR.G             | 4            | TENS1_HUMAN          |
| Q9HBL0                                                  | 2             | 2.7023           | K.YSM#PDNSPETR.A                 | 1            | TENS1_HUMAN          |
| Q9HBL0                                                  | 3             | 4.4448           | R.GLNSWQQQQQQQQPRPPR.Q           | 3            | TENS1_HUMAN          |
| Q9HBL0                                                  | 2             | 2.7748           | R.QGSPTPALPEK.R                  | 1            | TENS1_HUMAN          |
| Q9HBL0                                                  | 3             | 5.9155           | K.EATSDPSRTPEEEPLNLEGLVAHR.V     | 2            | TENS1_HUMAN          |
| Q9HBL0                                                  | 2             | 4.6954           | K.SFSAPATQAYGHEIPLR.N            | 3            | TENS1_HUMAN          |
| Q9HBL0                                                  | 2             | 4.2662           | K.SQSVPGAWPGASPLSSQPLSGSSR.Q     | 2            | TENS1_HUMAN          |
| Q9HBL0                                                  | 2             | 2.9296           | K.VATTPGSPSLGR.H                 | 2            | TENS1_HUMAN          |

| <i>Accession No*</i>                                                                                            | <i>Charge</i> | <i>XC(Max)**</i> | <i>Peptide*</i>                     | <i>TC***</i> | <i>Reference No*</i> |
|-----------------------------------------------------------------------------------------------------------------|---------------|------------------|-------------------------------------|--------------|----------------------|
| Q9HBL0                                                                                                          | 2             | 4.5804           | R.AASDGQYENQSPEATSPR.S              | 4            | TENS1_HUMAN          |
| Q9HBL0                                                                                                          | 3             | 5.0611           | R.AASQQEIEQSIETLNMLMLDLEPASAAAPLHK. | 1            | TENS1_HUMAN          |
| Q9HBL0                                                                                                          | 3             | 3.8835           | R.AGPAHAGHTAPM#RPSYSAQEGLAGYQR.E    | 1            | TENS1_HUMAN          |
| Q9HBL0                                                                                                          | 3             | 4.5316           | R.AGPAHAGHTAPMRPSYSAQEGLAGYQR.E     | 3            | TENS1_HUMAN          |
| Q9HBL0                                                                                                          | 2             | 4.3292           | R.AGSLPNYATINGK.V                   | 2            | TENS1_HUMAN          |
| Q9HBL0                                                                                                          | 2             | 4.0502           | R.AQFSVAGVHTVPGSPQAR.H              | 3            | TENS1_HUMAN          |
| Q9HBL0                                                                                                          | 2             | 2.8253           | R.EKQPAEPPAPLR.R                    | 2            | TENS1_HUMAN          |
| Q9HBL0                                                                                                          | 3             | 5.0423           | K.TDKTDEPVPGASSATAALSPQEKR.E        | 2            | TENS1_HUMAN          |
| <b><i>Tensin-3 - Homo sapiens (Human)</i></b>                                                                   |               |                  |                                     |              |                      |
| Q68CZ2                                                                                                          | 3             | 4.1304           | R.QQQM#VVAHQYSFAPDGEAR.L            | 1            | TENS3_HUMAN          |
| Q68CZ2                                                                                                          | 2             | 3.0155           | R.LPDTGEGPSR.A                      | 2            | TENS3_HUMAN          |
| Q68CZ2                                                                                                          | 3             | 3.8097           | R.QQQMVVAHQYSFAPDGEAR.L             | 1            | TENS3_HUMAN          |
| Q68CZ2                                                                                                          | 2             | 3.2434           | K.ETM#TPGYDLDIIDGR.I                | 1            | TENS3_HUMAN          |
| Q68CZ2                                                                                                          | 2             | 3.1811           | K.AELDQLLSGFGLEDPGSSLK.E            | 1            | TENS3_HUMAN          |
| Q68CZ2                                                                                                          | 2             | 3.9925           | R.GVGSPPHPPDTQQPSPSK.A              | 2            | TENS3_HUMAN          |
| <b><i>Tensin-like C1 domain-containing phosphatase - Homo sapiens (Human)</i></b>                               |               |                  |                                     |              |                      |
| Q63HR2                                                                                                          | 2             | 3.0141           | K.LALPTAALYGLR.L                    | 2            | TENC1_HUMAN          |
| Q63HR2                                                                                                          | 3             | 5.2964           | R.HLPGPGQQPGPWGPEQASSPAR.G          | 1            | TENC1_HUMAN          |
| Q63HR2                                                                                                          | 2             | 2.869            | R.SPVPTTLPLGR.H                     | 1            | TENC1_HUMAN          |
| <b><i>Testin - Homo sapiens (Human)</i></b>                                                                     |               |                  |                                     |              |                      |
| Q9UGI8                                                                                                          | 2             | 3.4047           | R.NVMILTNPVAAK.K                    | 2            | TES_HUMAN            |
| <b><i>Testis-expressed sequence 15 protein - Homo sapiens (Human)</i></b>                                       |               |                  |                                     |              |                      |
| Q9BXT5                                                                                                          | 1             | 2.1273           | K.IYDTLSK.D                         | 1            | TEX15_HUMAN          |
| <b><i>Testis-specific Y-encoded-like protein 1 - Homo sapiens (Human)</i></b>                                   |               |                  |                                     |              |                      |
| Q9H0U9                                                                                                          | 3             | 3.7983           | R.SASELTAGAEAEAEVKTGK.C             | 1            | TSYL1_HUMAN          |
| Q9H0U9                                                                                                          | 3             | 3.8041           | K.AGQEEGQPPAEGLAAASVMAADR.S         | 1            | TSYL1_HUMAN          |
| Q9H0U9                                                                                                          | 3             | 5.2694           | R.MDPLEAIQLELDTVNAQADR.A            | 1            | TSYL1_HUMAN          |
| <b><i>Tetratricopeptide repeat protein 1 - Homo sapiens (Human)</i></b>                                         |               |                  |                                     |              |                      |
| Q99614                                                                                                          | 2             | 3.7369           | K.AIQLNPSYIR.A                      | 2            | TTC1_HUMAN           |
| Q99614                                                                                                          | 4             | 4.9454           | K.LLRDDEAHLQEDQGEEECFHDCSASFEEEPG   | 1            | TTC1_HUMAN           |
| <b><i>Tetratricopeptide repeat, ankyrin repeat and coiled-coil-containing protein 1 - Homo sapiens (Hum</i></b> |               |                  |                                     |              |                      |
| Q9C0D5                                                                                                          | 2             | 3.6263           | K.SLREPVAQPGLLLQPSK.Q               | 2            | Q9C0D5_HUMA          |
| Q9C0D5                                                                                                          | 2             | 3.3585           | K.TVSHLYQESISK.Q                    | 1            | Q9C0D5_HUMA          |
| Q9C0D5                                                                                                          | 2             | 3.7865           | R.FQQQSNPPSR.S                      | 2            | Q9C0D5_HUMA          |
| <b><i>Thiamine-triphosphatase - Homo sapiens (Human)</i></b>                                                    |               |                  |                                     |              |                      |

| <i>Accession No*</i>                                                                    | <i>Charge</i> | <i>XC(Max)**</i> | <i>Peptide*</i>                | <i>TC***</i> | <i>Reference No*</i> |
|-----------------------------------------------------------------------------------------|---------------|------------------|--------------------------------|--------------|----------------------|
| Q9BU02                                                                                  | 2             | 3.3446           | R.LSSMLGVPAQETAPAK.L           | 1            | THTPA_HUMAN          |
| <b><i>Thioredoxin - Homo sapiens (Human)</i></b>                                        |               |                  |                                |              |                      |
| P10599                                                                                  | 2             | 3.8921           | K.M#IKPFFHSLSEK.Y              | 4            | THIO_HUMAN           |
| P10599                                                                                  | 2             | 3.8878           | K.MIKPFFHSLSEK.Y               | 4            | THIO_HUMAN           |
| <b><i>Thioredoxin domain-containing protein 1 precursor - Homo sapiens (Human)</i></b>  |               |                  |                                |              |                      |
| Q9H3N1                                                                                  | 2             | 3.4118           | K.VEEEEQEADEEDVSEEEAESK.E      | 1            | TXND1_HUMAN          |
| <b><i>Thioredoxin domain-containing protein 12 precursor - Homo sapiens (Human)</i></b> |               |                  |                                |              |                      |
| O95881                                                                                  | 3             | 4.0432           | K.YFYVSAEQVVQGMKEAQR.L         | 1            | TXD12_HUMAN          |
| O95881                                                                                  | 3             | 4.2726           | R.IFLDPSGKVVHPEIINENGNPSYK.Y   | 1            | TXD12_HUMAN          |
| O95881                                                                                  | 2             | 2.7315           | K.YFYVSAEQVVQGM#K.E            | 1            | TXD12_HUMAN          |
| O95881                                                                                  | 2             | 4.266            | K.EAAASGLPLMVIHK.S             | 4            | TXD12_HUMAN          |
| O95881                                                                                  | 2             | 3.2382           | K.YFYVSAEQVVQGMK.E             | 2            | TXD12_HUMAN          |
| <b><i>Thioredoxin domain-containing protein 4 precursor - Homo sapiens (Human)</i></b>  |               |                  |                                |              |                      |
| Q9BS26                                                                                  | 3             | 4.0482           | K.SDPIQEIRDLAEITTLDR.S         | 1            | TXND4_HUMAN          |
| Q9BS26                                                                                  | 3             | 4.9402           | R.HMYVFGDFKDVLPKG.L            | 2            | TXND4_HUMAN          |
| <b><i>Thioredoxin domain-containing protein 6 - Homo sapiens (Human)</i></b>            |               |                  |                                |              |                      |
| Q86XW9                                                                                  | 1             | 2.2724           | K.AGEEAFEK.L                   | 2            | TXND6_HUMAN          |
| <b><i>Thioredoxin, mitochondrial precursor - Homo sapiens (Human)</i></b>               |               |                  |                                |              |                      |
| Q99757                                                                                  | 3             | 4.8131           | K.NGDVVDFKVGIKDEEDQLEAFLK.K    | 2            | THIOM_HUMAN          |
| <b><i>Thioredoxin-like protein 5 - Homo sapiens (Human)</i></b>                         |               |                  |                                |              |                      |
| Q9BRA2                                                                                  | 2             | 3.5401           | K.NLKVTAVPTLLK.Y               | 2            | TXNL5_HUMAN          |
| Q9BRA2                                                                                  | 2             | 3.3374           | K.TIFAYFTGSK.D                 | 3            | TXNL5_HUMAN          |
| <b><i>Thioredoxin-like selenoprotein M precursor - Homo sapiens (Human)</i></b>         |               |                  |                                |              |                      |
| Q8WWX9                                                                                  | 2             | 2.7666           | K.AFVTQDIPFYHNLVMK.H           | 1            | SELM_HUMAN           |
| <b><i>THO complex subunit 4 - Homo sapiens (Human)</i></b>                              |               |                  |                                |              |                      |
| Q86V81                                                                                  | 2             | 4.2235           | R.SLGTADVHFER.K                | 6            | THOC4_HUMAN          |
| Q86V81                                                                                  | 2             | 3.2251           | R.PMNIQLVTSQIDAQR.R            | 1            | THOC4_HUMAN          |
| Q86V81                                                                                  | 2             | 3.3778           | R.GAGGFGGGGGTR.R               | 4            | THOC4_HUMAN          |
| Q86V81                                                                                  | 3             | 5.2282           | K.WQHDLFDSGFGGGAGVETGGK.L      | 3            | THOC4_HUMAN          |
| Q86V81                                                                                  | 2             | 5.4065           | K.QQLSAEELDAQLDAYNAR.M         | 4            | THOC4_HUMAN          |
| Q86V81                                                                                  | 2             | 2.7593           | K.KAAVHYDR.S                   | 1            | THOC4_HUMAN          |
| Q86V81                                                                                  | 3             | 5.0388           | K.QLPDKWQHDLFDSGFGGGAGVETGGK.L | 4            | THOC4_HUMAN          |
| <b><i>Thrombomodulin precursor - Homo sapiens (Human)</i></b>                           |               |                  |                                |              |                      |
| P07204                                                                                  | 2             | 3.0232           | R.SSVAADVISLLLNGDGGVGR.R       | 1            | TRBM_HUMAN           |
| <b><i>Thrombospondin-1 precursor - Homo sapiens (Human)</i></b>                         |               |                  |                                |              |                      |

| <i>Accession No*</i>                                                               | <i>Charge</i> | <i>XC(Max)**</i> | <i>Peptide*</i>                    | <i>TC***</i> | <i>Reference No*</i> |
|------------------------------------------------------------------------------------|---------------|------------------|------------------------------------|--------------|----------------------|
| P07996                                                                             | 2             | 4.3285           | R.FTGSQPFQGGVEHATANK.Q             | 3            | TSP1_HUMAN           |
| P07996                                                                             | 2             | 2.7392           | R.TNYIGHK.T                        | 1            | TSP1_HUMAN           |
| P07996                                                                             | 2             | 4.6897           | R.KVTEENKELANELR.R                 | 3            | TSP1_HUMAN           |
| P07996                                                                             | 2             | 2.887            | K.GTSQNDPNWVVR.H                   | 2            | TSP1_HUMAN           |
| P07996                                                                             | 2             | 2.9915           | K.GGVNDNFQGVLQNVF.F                | 2            | TSP1_HUMAN           |
| P07996                                                                             | 2             | 3.7019           | R.TIVTTLQDSIR.K                    | 4            | TSP1_HUMAN           |
| P07996                                                                             | 3             | 3.8242           | R.DTDMDGVGDQCDCNCPLEHNPDQLDSDSDR.I | 1            | TSP1_HUMAN           |
| <b><i>Thymocyte nuclear protein 1 - Homo sapiens (Human)</i></b>                   |               |                  |                                    |              |                      |
| Q9P016                                                                             | 2             | 2.8972           | K.TENSGEALAK.V                     | 1            | THYN1_HUMAN          |
| Q9P016                                                                             | 3             | 3.8485           | K.TENSGEALAKVEDSNPQK.T             | 1            | THYN1_HUMAN          |
| Q9P016                                                                             | 3             | 4.0496           | R.TKTENSGEALAK.V                   | 4            | THYN1_HUMAN          |
| <b><i>Thymosin beta-10 - Homo sapiens (Human)</i></b>                              |               |                  |                                    |              |                      |
| P63313                                                                             | 2             | 4.0279           | K.NTLPTKETIEQEK.R.S                | 13           | TYB10_HUMAN          |
| P63313                                                                             | 2             | 4.0896           | K.TETQEKNLPTK.E                    | 4            | TYB10_HUMAN          |
| P63313                                                                             | 2             | 4.0701           | K.NTLPTKETIEQEK.R                  | 10           | TYB10_HUMAN          |
| P63313                                                                             | 1             | 2.4055           | K.NTLPTK.E                         | 7            | TYB10_HUMAN          |
| P63313                                                                             | 2             | 4.7269           | K.KTETQEKNLPTK.E                   | 4            | TYB10_HUMAN          |
| P63313                                                                             | 2             | 5.1986           | K.TETQEKNLPTKETIEQEK.R             | 3            | TYB10_HUMAN          |
| <b><i>Thyroid hormone receptor-associated protein 3 - Homo sapiens (Human)</i></b> |               |                  |                                    |              |                      |
| Q9Y2W1                                                                             | 2             | 3.0496           | K.SDSFAPK.T                        | 2            | TR150_HUMAN          |
| Q9Y2W1                                                                             | 3             | 5.1046           | R.KTEELEEEESFPER.S                 | 5            | TR150_HUMAN          |
| Q9Y2W1                                                                             | 2             | 3.2107           | R.ASAVSELSR.E                      | 2            | TR150_HUMAN          |
| Q9Y2W1                                                                             | 2             | 3.1115           | K.EESAASGGAAYTKR.Y                 | 2            | TR150_HUMAN          |
| Q9Y2W1                                                                             | 2             | 3.5392           | K.WEGLVYAPPGK.E                    | 1            | TR150_HUMAN          |
| Q9Y2W1                                                                             | 2             | 3.571            | R.NREEEWDPEYTPK.S                  | 4            | TR150_HUMAN          |
| Q9Y2W1                                                                             | 2             | 2.8352           | K.TDSEKPF.R.G                      | 2            | TR150_HUMAN          |
| Q9Y2W1                                                                             | 3             | 5.2379           | K.SPPSTGSTYGSSQKEESAASGGAAYTKR.Y   | 1            | TR150_HUMAN          |
| Q9Y2W1                                                                             | 3             | 4.4033           | K.SPPSTGSTYGSSQKEESAASGGAAYTK.R    | 1            | TR150_HUMAN          |
| Q9Y2W1                                                                             | 2             | 3.4196           | K.SPLQSVVVR.R                      | 4            | TR150_HUMAN          |
| Q9Y2W1                                                                             | 2             | 3.0088           | K.MKSDSFAPK.T                      | 4            | TR150_HUMAN          |
| Q9Y2W1                                                                             | 2             | 3.0538           | K.M#KSDSFAPK.T                     | 2            | TR150_HUMAN          |
| Q9Y2W1                                                                             | 2             | 2.9928           | K.GSFSDTGLGDGK.M                   | 5            | TR150_HUMAN          |
| Q9Y2W1                                                                             | 2             | 3.125            | K.GRKESEFDDEPK.F                   | 1            | TR150_HUMAN          |
| Q9Y2W1                                                                             | 3             | 4.3883           | K.FSGEEGEIEDDESGTENREEKDNIQPTTE.-  | 2            | TR150_HUMAN          |
| Q9Y2W1                                                                             | 2             | 3.3783           | K.EQTFSGGTSQDTK.A                  | 2            | TR150_HUMAN          |

| <i>Accession No*</i>                                                                      | <i>Charge</i> | <i>XC(Max)**</i> | <i>Peptide*</i>                     | <i>TC***</i> | <i>Reference No*</i> |
|-------------------------------------------------------------------------------------------|---------------|------------------|-------------------------------------|--------------|----------------------|
| Q9Y2W1                                                                                    | 2             | 3.022            | K.EESAASGGAAYTK.R                   | 1            | TR150_HUMAN          |
| Q9Y2W1                                                                                    | 3             | 4.9453           | K.ASESSKPWPDATYGTGSASR.A            | 6            | TR150_HUMAN          |
| Q9Y2W1                                                                                    | 2             | 3.2451           | K.ESEFDDEPKFMSK.V                   | 1            | TR150_HUMAN          |
| <b><i>Thyroid receptor-interacting protein 11 - Homo sapiens (Human)</i></b>              |               |                  |                                     |              |                      |
| Q15643                                                                                    | 2             | 2.957            | K.IIEDQNQSK.M                       | 3            | TRIPB_HUMAN          |
| Q15643                                                                                    | 2             | 3.8482           | R.ILAQASASVEEVFR.L                  | 2            | TRIPB_HUMAN          |
| <b><i>Thyroid transcription factor 1-associated protein 26 - Homo sapiens (Human)</i></b> |               |                  |                                     |              |                      |
| Q9P031                                                                                    | 2             | 3.536            | K.AQEEYEIQAK.R                      | 2            | TAP26_HUMAN          |
| Q9P031                                                                                    | 2             | 3.0225           | K.HLYLAEER.H                        | 1            | TAP26_HUMAN          |
| <b><i>Tight junction protein ZO-1 - Homo sapiens (Human)</i></b>                          |               |                  |                                     |              |                      |
| Q07157                                                                                    | 2             | 3.8488           | R.LEEPTPAPSTSYSPQADSLR.T            | 2            | ZO1_HUMAN            |
| Q07157                                                                                    | 4             | 5.716            | R.SFENKPPAHIAASHLSEPAKPAHSQNQSNFS   | 1            | ZO1_HUMAN            |
| <b><i>Tight junction protein ZO-2 - Homo sapiens (Human)</i></b>                          |               |                  |                                     |              |                      |
| Q9UDY2                                                                                    | 2             | 4.3832           | R.MQELQEAQNAR.I                     | 4            | ZO2_HUMAN            |
| Q9UDY2                                                                                    | 2             | 3.0787           | R.RAASSDQLR.D                       | 1            | ZO2_HUMAN            |
| Q9UDY2                                                                                    | 3             | 3.9578           | R.SILKPSTPIPPQEGEEVGESSEEQDNAPK.S   | 1            | ZO2_HUMAN            |
| Q9UDY2                                                                                    | 2             | 4.315            | K.SNPSAVAGNETPGASTK.G               | 4            | ZO2_HUMAN            |
| Q9UDY2                                                                                    | 3             | 4.3943           | R.IEIAQKHPDIYAVPIK.T                | 2            | ZO2_HUMAN            |
| Q9UDY2                                                                                    | 2             | 4.3584           | R.M#QELQEAQNAR.I                    | 2            | ZO2_HUMAN            |
| <b><i>Tight junction-associated protein 1 - Homo sapiens (Human)</i></b>                  |               |                  |                                     |              |                      |
| Q5JTD0                                                                                    | 2             | 3.8353           | R.GTEEGPGTSHTEGR.A                  | 2            | TJAP1_HUMAN          |
| Q5JTD0                                                                                    | 3             | 4.6961           | R.KHLHSGQEAAASPGPAPSLAPGAVVPTSVIAR. | 2            | TJAP1_HUMAN          |
| Q5JTD0                                                                                    | 2             | 3.9198           | R.LEIPGSRLEQEEPLTDAER.M             | 2            | TJAP1_HUMAN          |
| Q5JTD0                                                                                    | 2             | 3.422            | R.QAISLSLVEEGSER.A                  | 1            | TJAP1_HUMAN          |
| Q5JTD0                                                                                    | 3             | 4.5383           | R.RVIEFSEDKVR.I                     | 2            | TJAP1_HUMAN          |
| <b><i>TOM1-like protein 2 - Homo sapiens (Human)</i></b>                                  |               |                  |                                     |              |                      |
| Q6ZVM7                                                                                    | 2             | 3.0944           | R.DGFDMFAQTR.G                      | 1            | TM1L2_HUMAN          |
| Q6ZVM7                                                                                    | 3             | 4.9893           | R.KVTYEDPQAVGGLASALDNRK.Q           | 2            | TM1L2_HUMAN          |
| Q6ZVM7                                                                                    | 2             | 3.6166           | R.DGFDM#FAQTR.G                     | 3            | TM1L2_HUMAN          |
| Q6ZVM7                                                                                    | 3             | 4.9761           | K.TVTYEDPQAVGGLASALDNR.K            | 4            | TM1L2_HUMAN          |
| <b><i>Torsin family protein C9orf167 - Homo sapiens (Human)</i></b>                       |               |                  |                                     |              |                      |
| Q9NXH8                                                                                    | 2             | 3.1411           | R.GQPSLEPAAAAPR.A                   | 2            | C1167_HUMAN          |
| <b><i>Torsin-1A-interacting protein 1 - Homo sapiens (Human)</i></b>                      |               |                  |                                     |              |                      |
| Q5JTV8                                                                                    | 3             | 5.1439           | K.VNFSEEGETEEDDQDSSHSSVTTVK.A       | 1            | TOIP1_HUMAN          |
| Q5JTV8                                                                                    | 3             | 3.9671           | R.LQQQHSEQPPLQPSPVM#TR.R            | 1            | TOIP1_HUMAN          |

| <i>Accession No*</i>                                                                    | <i>Charge</i> | <i>XC(Max)**</i> | <i>Peptide*</i>                  | <i>TC***</i> | <i>Reference No*</i> |
|-----------------------------------------------------------------------------------------|---------------|------------------|----------------------------------|--------------|----------------------|
| Q5JTV8                                                                                  | 2             | 3.5843           | R.SIQEAPVSEDLVIR.L               | 1            | TOIP1_HUMAN          |
| <b><i>Torsin-1A-interacting protein 2 - Homo sapiens (Human)</i></b>                    |               |                  |                                  |              |                      |
| Q8NFAQ8                                                                                 | 3             | 5.1253           | K.EASDGTGASQEPPTTDSQEAQSPGHSSAGQ | 2            | TOIP2_HUMAN          |
| <b><i>TRAF family member-associated NF-kappa-B activator - Homo sapiens (Human)</i></b> |               |                  |                                  |              |                      |
| Q92844                                                                                  | 2             | 2.851            | R.RQEVSSPR.K                     | 2            | TANK_HUMAN           |
| <b><i>TRAF2 and NCK-interacting protein kinase - Homo sapiens (Human)</i></b>           |               |                  |                                  |              |                      |
| Q9UKE5                                                                                  | 3             | 4.207            | R.VSTHSQEMDSGTEYGMGSSTK.A        | 1            | TNIK_HUMAN           |
| <b><i>TRAF-type zinc finger domain-containing protein 1 - Homo sapiens (Human)</i></b>  |               |                  |                                  |              |                      |
| O14545                                                                                  | 2             | 3.8226           | K.LSNSDSQDIQGR.N                 | 3            | TRAD1_HUMAN          |
| <b><i>Transcription elongation factor A protein 1 - Homo sapiens (Human)</i></b>        |               |                  |                                  |              |                      |
| P23193                                                                                  | 3             | 4.1411           | R.MTAEEMASDELKEMR.K              | 2            | TCEA1_HUMAN          |
| P23193                                                                                  | 2             | 3.5176           | K.NAAGALDLLK.E                   | 1            | TCEA1_HUMAN          |
| P23193                                                                                  | 2             | 3.911            | K.LLDGPSTEKDLDEK.K               | 3            | TCEA1_HUMAN          |
| P23193                                                                                  | 2             | 3.3521           | R.EESTSSGNVSNR.K                 | 5            | TCEA1_HUMAN          |
| P23193                                                                                  | 2             | 2.7342           | K.NIPM#TLELLQSTR.I               | 2            | TCEA1_HUMAN          |
| <b><i>Transcription elongation factor A protein 3 - Homo sapiens (Human)</i></b>        |               |                  |                                  |              |                      |
| O75764                                                                                  | 2             | 3.2914           | K.MASEIEDHIYQELK.S               | 1            | TCEA3_HUMAN          |
| O75764                                                                                  | 2             | 3.2631           | K.MTAEEMASDELRELR.N              | 1            | TCEA3_HUMAN          |
| O75764                                                                                  | 2             | 3.3807           | R.NVLSGAISAGLIAK.M               | 2            | TCEA3_HUMAN          |
| <b><i>Transcription elongation factor A protein-like 3 - Homo sapiens (Human)</i></b>   |               |                  |                                  |              |                      |
| Q969E4                                                                                  | 3             | 4.4628           | K.REDEGEPGDEGQLEDEGSQEK.Q        | 2            | TCAL3_HUMAN          |
| Q969E4                                                                                  | 2             | 2.9662           | R.EDEGEPGDEGQLEDEGSQEK.Q         | 2            | TCAL3_HUMAN          |
| <b><i>Transcription elongation factor A protein-like 4 - Homo sapiens (Human)</i></b>   |               |                  |                                  |              |                      |
| Q96EI5                                                                                  | 2             | 3.2119           | R.EGESEMEGGSER.E                 | 3            | TCAL4_HUMAN          |
| Q96EI5                                                                                  | 3             | 4.2316           | R.EGKPEIEGKPESEGEPSGSETR.A       | 1            | TCAL4_HUMAN          |
| Q96EI5                                                                                  | 2             | 2.7906           | R.EGESEM#EGGSER.E                | 1            | TCAL4_HUMAN          |
| <b><i>Transcription elongation factor A protein-like 8 - Homo sapiens (Human)</i></b>   |               |                  |                                  |              |                      |
| Q8IYN2                                                                                  | 3             | 6.2997           | K.AEEDRPLEDVPQEAEGNPQPSEEGVSQAE  | 1            | TCAL8_HUMAN          |
| <b><i>Transcription elongation factor B polypeptide 3 - Homo sapiens (Human)</i></b>    |               |                  |                                  |              |                      |
| Q14241                                                                                  | 2             | 2.9255           | K.LSTLPITVDILAETGVGK.T           | 1            | ELOA1_HUMAN          |
| Q14241                                                                                  | 3             | 3.8669           | K.SEKPAGADLAK.L                  | 1            | ELOA1_HUMAN          |
| Q14241                                                                                  | 2             | 2.7039           | K.TSATALGDK.G                    | 1            | ELOA1_HUMAN          |
| Q14241                                                                                  | 3             | 5.6707           | R.DALQKEEEMEGDYQETWK.A           | 3            | ELOA1_HUMAN          |
| Q14241                                                                                  | 2             | 2.7223           | R.HLGEPHGK.G                     | 1            | ELOA1_HUMAN          |
| <b><i>Transcription elongation factor SPT5 - Homo sapiens (Human)</i></b>               |               |                  |                                  |              |                      |

| <i>Accession No*</i>                                                                 | <i>Charge</i> | <i>XC(Max)**</i> | <i>Peptide*</i>                   | <i>TC***</i> | <i>Reference No*</i> |
|--------------------------------------------------------------------------------------|---------------|------------------|-----------------------------------|--------------|----------------------|
| O00267                                                                               | 2             | 3.8238           | R.TPMYGSQTPLQDGSR.T               | 2            | SPT5H_HUMAN          |
| O00267                                                                               | 2             | 3.0946           | R.RPGGMTSTYGR.T                   | 1            | SPT5H_HUMAN          |
| O00267                                                                               | 2             | 3.639            | R.TPM#YGSQTPLQDGSR.T              | 1            | SPT5H_HUMAN          |
| <b><i>Transcription elongation factor SPT6 - Homo sapiens (Human)</i></b>            |               |                  |                                   |              |                      |
| Q7KZ85                                                                               | 2             | 3.2119           | K.MAEQWLQEK.E                     | 2            | SPT6H_HUMAN          |
| <b><i>Transcription elongation regulator 1 - Homo sapiens (Human)</i></b>            |               |                  |                                   |              |                      |
| O14776                                                                               | 3             | 5.6825           | R.RGPPPTASEPTRR.S                 | 2            | TCRG1_HUMAN          |
| O14776                                                                               | 2             | 3.2715           | R.EALFNEFVAAAR.K                  | 2            | TCRG1_HUMAN          |
| <b><i>Transcription factor 20 - Homo sapiens (Human)</i></b>                         |               |                  |                                   |              |                      |
| Q9UGU0                                                                               | 2             | 2.7759           | K.QINLTDYPIPR.K                   | 1            | TCF20_HUMAN          |
| Q9UGU0                                                                               | 2             | 2.8861           | R.KSSSTAPEMK.Q                    | 1            | TCF20_HUMAN          |
| <b><i>Transcription factor 4 - Homo sapiens (Human)</i></b>                          |               |                  |                                   |              |                      |
| P15884                                                                               | 2             | 3.532            | R.GSGAAGSSQTGDALGK.A              | 2            | ITF2_HUMAN           |
| <b><i>Transcription factor A, mitochondrial precursor - Homo sapiens (Human)</i></b> |               |                  |                                   |              |                      |
| Q00059                                                                               | 3             | 4.0993           | R.FKEQLTPSQIM#SLEK.E              | 2            | TFAM_HUMAN           |
| Q00059                                                                               | 2             | 4.0727           | R.SAYNVVVAER.F                    | 1            | TFAM_HUMAN           |
| Q00059                                                                               | 2             | 3.8017           | R.FQEAKGDSPQEK.L                  | 4            | TFAM_HUMAN           |
| Q00059                                                                               | 3             | 3.7599           | R.FKEQLTPSQIMSLEK.E               | 1            | TFAM_HUMAN           |
| Q00059                                                                               | 2             | 2.8023           | K.SWEEQMIEVGRK.D                  | 1            | TFAM_HUMAN           |
| Q00059                                                                               | 2             | 3.1967           | K.SWEEQMIEVGR.K                   | 3            | TFAM_HUMAN           |
| Q00059                                                                               | 3             | 3.8376           | K.NLSDSEKELYIQHAKEDETR.Y          | 1            | TFAM_HUMAN           |
| Q00059                                                                               | 3             | 5.507            | R.FKEQLTPSQIMSLEKEIMDK.H          | 2            | TFAM_HUMAN           |
| <b><i>Transcription factor AP-1 - Homo sapiens (Human)</i></b>                       |               |                  |                                   |              |                      |
| P05412                                                                               | 2             | 4.6625           | K.AQNSELASTANMLR.E                | 2            | JUN_HUMAN            |
| P05412                                                                               | 2             | 3.5778           | K.NVTDEQEGFAEGFVR.A               | 2            | JUN_HUMAN            |
| <b><i>Transcription factor BTF3 - Homo sapiens (Human)</i></b>                       |               |                  |                                   |              |                      |
| P20290                                                                               | 4             | 4.7882           | K.LGVNNSIGIEEVNMFTNQGTVIHFNNPK.V  | 1            | BTF3_HUMAN           |
| P20290                                                                               | 2             | 3.5125           | R.TGAPAQADSR.G                    | 2            | BTF3_HUMAN           |
| P20290                                                                               | 2             | 4.0784           | R.GQEPQMKETIMNQEK.L               | 1            | BTF3_HUMAN           |
| P20290                                                                               | 2             | 3.6051           | R.GQEPQMKETIM#NQEK.L              | 1            | BTF3_HUMAN           |
| P20290                                                                               | 3             | 4.151            | R.GQEPQM#KETIMNQEK.L              | 2            | BTF3_HUMAN           |
| P20290                                                                               | 3             | 4.1099           | K.QLTEMLPSILNQLGADSLTSLR.R        | 1            | BTF3_HUMAN           |
| P20290                                                                               | 2             | 5.6521           | K.VQASLAANTFTITGHAETK.Q           | 2            | BTF3_HUMAN           |
| P20290                                                                               | 3             | 5.013            | K.LGVNNSIGIEEVNM#FTNQGTVIHFNNPK.V | 1            | BTF3_HUMAN           |
| P20290                                                                               | 2             | 3.2275           | R.GGCPGGEATLSQPPPR.G              | 1            | BTF3_HUMAN           |

| <i>Accession No*</i>                                                                   | <i>Charge</i> | <i>XC(Max)**</i> | <i>Peptide*</i>                   | <i>TC***</i> | <i>Reference No*</i> |
|----------------------------------------------------------------------------------------|---------------|------------------|-----------------------------------|--------------|----------------------|
| <b><i>Transcription factor BTF3 homolog 2 - Homo sapiens (Human)</i></b>               |               |                  |                                   |              |                      |
| Q13891                                                                                 | 2             | 2.8295           | -.M#KETIM#NQEK.L                  | 1            | BT3L2_HUMAN          |
| Q13891                                                                                 | 2             | 3.5621           | -.M#KETIMNQEK.L                   | 1            | BT3L2_HUMAN          |
| Q13891                                                                                 | 2             | 3.2376           | -.MKETIM#NQEK.L                   | 1            | BT3L2_HUMAN          |
| <b><i>Transcription factor E3 - Homo sapiens (Human)</i></b>                           |               |                  |                                   |              |                      |
| P19532                                                                                 | 2             | 2.7228           | R.TPAMSSSSSR.V                    | 1            | TFE3_HUMAN           |
| <b><i>Transcription factor EB - Homo sapiens (Human)</i></b>                           |               |                  |                                   |              |                      |
| P19484                                                                                 | 2             | 3.3682           | K.SRELENHSR.R                     | 4            | TFEB_HUMAN           |
| P19484                                                                                 | 3             | 4.6454           | R.VHGLPTTSPSGMMAELAQQVVK.Q        | 2            | TFEB_HUMAN           |
| <b><i>Transcription factor HES-3 - Homo sapiens (Human)</i></b>                        |               |                  |                                   |              |                      |
| Q5TGS1                                                                                 | 2             | 3.0218           | R.KLEKADILELSVK.Y                 | 1            | HES3_HUMAN           |
| <b><i>Transcription factor jun-B - Homo sapiens (Human)</i></b>                        |               |                  |                                   |              |                      |
| P17275                                                                                 | 2             | 4.4565           | R.GGGSGGGAGGAGGGVTEEQEGFADGFVK.A  | 2            | JUNB_HUMAN           |
| <b><i>Transcription factor jun-D - Homo sapiens (Human)</i></b>                        |               |                  |                                   |              |                      |
| P17535                                                                                 | 2             | 4.1196           | K.VAASEEQEFAEGFVK.A               | 2            | JUND_HUMAN           |
| P17535                                                                                 | 2             | 4.4036           | K.SQNTELASTASLLR.E                | 2            | JUND_HUMAN           |
| <b><i>Transcription factor MafF - Homo sapiens (Human)</i></b>                         |               |                  |                                   |              |                      |
| Q9ULX9                                                                                 | 2             | 4.6253           | R.GPATLVAPASVITIVK.S              | 4            | MAFF_HUMAN           |
| <b><i>Transcription factor PU.1 - Homo sapiens (Human)</i></b>                         |               |                  |                                   |              |                      |
| P17947                                                                                 | 2             | 2.8309           | K.LTYQFSGEVLGRGGLAER.R            | 1            | SPI1_HUMAN           |
| <b><i>Transcription factor SOX-17 - Homo sapiens (Human)</i></b>                       |               |                  |                                   |              |                      |
| Q9H612                                                                                 | 3             | 4.3103           | R.LGPEPAGPSIPGLLAPPSALHVYYGAMGSPG | 1            | SOX17_HUMAN          |
| <b><i>Transcription factor Sp3 - Homo sapiens (Human)</i></b>                          |               |                  |                                   |              |                      |
| Q02447                                                                                 | 3             | 5.7026           | R.IKEEPPDPEEWQLSGDSTLNTNDLTHLR.V  | 1            | SP3_HUMAN            |
| <b><i>Transcription initiation factor IIE subunit beta - Homo sapiens (Human)</i></b>  |               |                  |                                   |              |                      |
| P29084                                                                                 | 2             | 2.9436           | K.DYSDITSSK.-                     | 1            | T2EB_HUMAN           |
| <b><i>Transcription initiation factor IIF subunit alpha - Homo sapiens (Human)</i></b> |               |                  |                                   |              |                      |
| P35269                                                                                 | 3             | 5.3829           | R.GNSRPGTPSAEGGSTSSTLR.A          | 1            | T2FA_HUMAN           |
| P35269                                                                                 | 2             | 4.0508           | R.TLTAEAEWEEWER.R                 | 1            | T2FA_HUMAN           |
| P35269                                                                                 | 3             | 5.0703           | R.LKDQDQDEDEEKEK.R                | 2            | T2FA_HUMAN           |
| P35269                                                                                 | 2             | 2.8133           | R.LDTGPGQSLSGK.S                  | 1            | T2FA_HUMAN           |
| P35269                                                                                 | 2             | 3.8659           | K.VNFATWNQAR.L                    | 3            | T2FA_HUMAN           |
| P35269                                                                                 | 2             | 3.2656           | K.VLNHFSIMQQR.R                   | 1            | T2FA_HUMAN           |
| P35269                                                                                 | 3             | 4.5105           | K.KTGLSSEQTVNVLAQILK.R            | 2            | T2FA_HUMAN           |
| P35269                                                                                 | 2             | 3.1152           | K.TTPNSGDVQVTEDAVR.R              | 1            | T2FA_HUMAN           |



| <i>Accession No*</i>                                                                  | <i>Charge</i> | <i>XC(Max)**</i> | <i>Peptide*</i>                  | <i>TC***</i> | <i>Reference No*</i> |
|---------------------------------------------------------------------------------------|---------------|------------------|----------------------------------|--------------|----------------------|
| <b><i>Transcription initiation factor IIF subunit beta - Homo sapiens (Human)</i></b> |               |                  |                                  |              |                      |
| P13984                                                                                | 2             | 3.106            | K.NTWELKPEYR.H                   | 2            | T2FB_HUMAN           |
| P13984                                                                                | 2             | 3.2164           | K.RLQIEESSKPVR.L                 | 1            | T2FB_HUMAN           |
| P13984                                                                                | 2             | 2.7159           | R.LSQQLDK.V                      | 1            | T2FB_HUMAN           |
| <b><i>Transcription initiation factor TFIID subunit 10 - Homo sapiens (Human)</i></b> |               |                  |                                  |              |                      |
| Q12962                                                                                | 2             | 4.8712           | K.ASPAGTAGGPGAGAAAGGTGPLAAR.A    | 2            | TAF10_HUMAN          |
| <b><i>Transcription initiation factor TFIID subunit 7 - Homo sapiens (Human)</i></b>  |               |                  |                                  |              |                      |
| Q15545                                                                                | 3             | 4.3931           | K.SKDDAPHELESQFILR.L             | 1            | TAF7_HUMAN           |
| Q15545                                                                                | 3             | 6.0464           | R.EKEQLSSLQEELESLEK.-            | 1            | TAF7_HUMAN           |
| <b><i>Transcription initiation factor TFIID subunit 9 - Homo sapiens (Human)</i></b>  |               |                  |                                  |              |                      |
| Q16594                                                                                | 3             | 4.017            | R.LSVGSVTSRPTPTLGTPTQTM#SVSTK.V  | 1            | TAF9_HUMAN           |
| <b><i>Transcription intermediary factor 1-beta - Homo sapiens (Human)</i></b>         |               |                  |                                  |              |                      |
| Q13263                                                                                | 2             | 3.3813           | K.DIVENYFMR.D                    | 1            | TIF1B_HUMAN          |
| <b><i>Transcriptional activator protein Pur-alpha - Homo sapiens (Human)</i></b>      |               |                  |                                  |              |                      |
| Q00577                                                                                | 2             | 2.8652           | K.IAEVGAGGNK.S                   | 1            | PURA_HUMAN           |
| Q00577                                                                                | 2             | 2.7351           | R.FFFDVGSNK.Y                    | 1            | PURA_HUMAN           |
| <b><i>Transcriptional adapter 3-like - Homo sapiens (Human)</i></b>                   |               |                  |                                  |              |                      |
| O75528                                                                                | 2             | 2.7782           | K.ESGADGASTSPR.N                 | 1            | TAD3L_HUMAN          |
| <b><i>Transcriptional regulator ERG - Homo sapiens (Human)</i></b>                    |               |                  |                                  |              |                      |
| P11308                                                                                | 2             | 3.6344           | R.VPQQDWLSQPPAR.V                | 1            | ERG_HUMAN            |
| P11308                                                                                | 2             | 3.6229           | K.TEM#TASSSSDYGQTSK.M            | 3            | ERG_HUMAN            |
| <b><i>Transcriptional repressor CTCF - Homo sapiens (Human)</i></b>                   |               |                  |                                  |              |                      |
| P49711                                                                                | 3             | 3.8756           | R.YTEEGKDVDVSVYDFEEEQEGLLSEVNAEK | 1            | CTCF_HUMAN           |
| <b><i>Transcriptional repressor p66 alpha - Homo sapiens (Human)</i></b>              |               |                  |                                  |              |                      |
| Q86YP4                                                                                | 2             | 4.2871           | R.ALERDPTEDDVESK.K               | 2            | P66A_HUMAN           |
| Q86YP4                                                                                | 2             | 3.3207           | R.ATEATAM#AM#GR.G                | 1            | P66A_HUMAN           |
| Q86YP4                                                                                | 2             | 3.1819           | R.GEGLVGDGPVDMR.T                | 1            | P66A_HUMAN           |
| Q86YP4                                                                                | 2             | 3.9485           | R.GLLASDLNTDGDMDR.V              | 1            | P66A_HUMAN           |
| <b><i>Transcriptional repressor p66 beta - Homo sapiens (Human)</i></b>               |               |                  |                                  |              |                      |
| Q8WXI9                                                                                | 3             | 3.9985           | K.LPSRPGAQGVEPQNL.R.T            | 1            | P66B_HUMAN           |
| Q8WXI9                                                                                | 2             | 3.2689           | R.VIAPNPAQLQGQR.G                | 2            | P66B_HUMAN           |
| <b><i>Transcriptional repressor protein YY1 - Homo sapiens (Human)</i></b>            |               |                  |                                  |              |                      |
| P25490                                                                                | 1             | 2.8009           | K.SHILTHAK.A                     | 1            | YY1_HUMAN            |
| P25490                                                                                | 2             | 3.0709           | R.KIKEDDAPR.T                    | 4            | YY1_HUMAN            |
| P25490                                                                                | 2             | 4.3198           | K.SYLSGGAGAAGGGGADPGNK.K         | 2            | YY1_HUMAN            |

| <i>Accession No*</i>                                                                                 | <i>Charge</i> | <i>XC(Max)**</i> | <i>Peptide*</i>                  | <i>TC***</i> | <i>Reference No*</i> |
|------------------------------------------------------------------------------------------------------|---------------|------------------|----------------------------------|--------------|----------------------|
| P25490                                                                                               | 3             | 4.3028           | K.KSYLSGGAGAAGGGGADPGNKK.W       | 2            | TTY1_HUMAN           |
| P25490                                                                                               | 2             | 4.1255           | K.SYLSGGAGAAGGGGADPGNKK.W        | 3            | TTY1_HUMAN           |
| <b><i>Transducin-like enhancer protein 1 - Homo sapiens (Human)</i></b>                              |               |                  |                                  |              |                      |
| Q04724                                                                                               | 2             | 3.5233           | K.DASSPASTASSASSTSLK.S           | 1            | TLE1_HUMAN           |
| <b><i>Transducin-like enhancer protein 3 - Homo sapiens (Human)</i></b>                              |               |                  |                                  |              |                      |
| Q04726                                                                                               | 2             | 4.6382           | K.DAPTSPASVASSSTPSSK.T           | 3            | TLE3_HUMAN           |
| Q04726                                                                                               | 2             | 3.4277           | R.NDAPTPGTSTTPGLR.S              | 2            | TLE3_HUMAN           |
| <b><i>Transformer-2 protein homolog - Homo sapiens (Human)</i></b>                                   |               |                  |                                  |              |                      |
| Q13595                                                                                               | 2             | 3.4154           | R.YGPLSGVNVVYDQR.T               | 2            | TRA2A_HUMAN          |
| <b><i>Transforming acidic coiled-coil-containing protein 1 - Homo sapiens (Human)</i></b>            |               |                  |                                  |              |                      |
| O75410                                                                                               | 3             | 7.0383           | K.SPPDLKETPGLTSSDTNDSGVELGEESR.S | 2            | TACC1_HUMAN          |
| O75410                                                                                               | 2             | 3.5472           | K.AIGGEFSDTNAAVEGTPLPK.A         | 2            | TACC1_HUMAN          |
| O75410                                                                                               | 2             | 4.1136           | R.GGAAGEDEAGGPEGDPEEEDSQAETK.S   | 3            | TACC1_HUMAN          |
| O75410                                                                                               | 2             | 2.751            | R.KLGSTLTPK.I                    | 1            | TACC1_HUMAN          |
| O75410                                                                                               | 2             | 4.6517           | K.ETPGTLSSDTNDSGVELGEESR.S       | 2            | TACC1_HUMAN          |
| O75410                                                                                               | 2             | 5.7422           | K.ASYHFSPEELDENTSPLLGDAR.F       | 1            | TACC1_HUMAN          |
| O75410                                                                                               | 3             | 4.3493           | K.NFREEPEHDFSK.I                 | 2            | TACC1_HUMAN          |
| O75410                                                                                               | 2             | 3.4533           | K.DSTDISAVLGTK.A                 | 2            | TACC1_HUMAN          |
| <b><i>Transforming acidic coiled-coil-containing protein 3 - Homo sapiens (Human)</i></b>            |               |                  |                                  |              |                      |
| Q9Y6A5                                                                                               | 3             | 4.6403           | K.APQVEVEDDGRSGAGEDPPM#PASR.G    | 1            | TACC3_HUMAN          |
| Q9Y6A5                                                                                               | 3             | 4.7475           | K.APQVEVEDDGRSGAGEDPPMPASR.G     | 1            | TACC3_HUMAN          |
| Q9Y6A5                                                                                               | 4             | 4.7399           | R.DSPGRPVVATETSSMHGANETPSGRPR.E  | 1            | TACC3_HUMAN          |
| <b><i>Transforming growth factor beta-1-induced transcript 1 protein - Homo sapiens (Human)</i></b>  |               |                  |                                  |              |                      |
| O43294                                                                                               | 3             | 4.8303           | K.ASATLLELDRLMASLSDFR.V          | 2            | TGFI1_HUMAN          |
| O43294                                                                                               | 3             | 5.2324           | R.VQNHLPASGPTQPPVVSSTNEGSPSPPEPT | 2            | TGFI1_HUMAN          |
| O43294                                                                                               | 2             | 2.7108           | R.RGVPTQAK.G                     | 1            | TGFI1_HUMAN          |
| O43294                                                                                               | 2             | 5.6843           | K.GSLDTMLGLLQSDLSR.R             | 10           | TGFI1_HUMAN          |
| O43294                                                                                               | 2             | 4.1516           | K.VASGEQKEDQSEDK.K               | 3            | TGFI1_HUMAN          |
| <b><i>Transforming growth factor-beta-induced protein ig-h3 precursor - Homo sapiens (Human)</i></b> |               |                  |                                  |              |                      |
| Q15582                                                                                               | 2             | 4.5781           | R.GDELADSALEIFK.Q                | 3            | BGH3_HUMAN           |
| <b><i>Transgelin - Homo sapiens (Human)</i></b>                                                      |               |                  |                                  |              |                      |
| Q01995                                                                                               | 2             | 2.7037           | K.HVIGLQM#GSNR.G                 | 1            | TAGL_HUMAN           |
| Q01995                                                                                               | 2             | 3.053            | R.GASQAGMTGYGRPR.Q               | 1            | TAGL_HUMAN           |
| Q01995                                                                                               | 2             | 3.5277           | R.GASQAGMTGYGR.P                 | 2            | TAGL_HUMAN           |
| Q01995                                                                                               | 2             | 3.8224           | K.KYDEELEER.L                    | 3            | TAGL_HUMAN           |

| <i>Accession No*</i>                                                                                  | <i>Charge</i> | <i>XC(Max)**</i> | <i>Peptide*</i>              | <i>TC***</i> | <i>Reference No*</i> |
|-------------------------------------------------------------------------------------------------------|---------------|------------------|------------------------------|--------------|----------------------|
| Q01995                                                                                                | 2             | 3.4222           | R.GASQAGM#TG YGR.P           | 1            | TAGL_HUMAN           |
| Q01995                                                                                                | 2             | 3.29             | R.EFTESQLQEGK.H              | 5            | TAGL_HUMAN           |
| <b><i>Transgelin-2 - Homo sapiens (Human)</i></b>                                                     |               |                  |                              |              |                      |
| P37802                                                                                                | 2             | 4.5822           | R.GASQAGM#TG YGM#PR.Q        | 3            | TAGL2_HUMAN          |
| P37802                                                                                                | 2             | 3.8573           | R.YGINTTDIFQTVDLWEGK.N       | 1            | TAGL2_HUMAN          |
| P37802                                                                                                | 1             | 4.2771           | R.TLMNLGGLAVAR.D             | 5            | TAGL2_HUMAN          |
| P37802                                                                                                | 2             | 3.0103           | R.TLM#NLGGLAVAR.D            | 1            | TAGL2_HUMAN          |
| P37802                                                                                                | 2             | 3.9846           | R.NFSDNQLQEGK.N              | 4            | TAGL2_HUMAN          |
| P37802                                                                                                | 2             | 3.0957           | R.GASQAGMTG YGM#PR.Q         | 2            | TAGL2_HUMAN          |
| P37802                                                                                                | 2             | 3.8165           | R.DDGLFSGDPNWFPPK.S          | 3            | TAGL2_HUMAN          |
| P37802                                                                                                | 2             | 4.0579           | R.DDGLFSGDPNWFPPK.K          | 2            | TAGL2_HUMAN          |
| P37802                                                                                                | 2             | 3.2591           | K.QM#EQISQFLQAAER.Y          | 2            | TAGL2_HUMAN          |
| P37802                                                                                                | 2             | 4.1534           | K.NVIGLQMGTNR.G              | 8            | TAGL2_HUMAN          |
| P37802                                                                                                | 2             | 3.8337           | K.NVIGLQM#GTNR.G             | 3            | TAGL2_HUMAN          |
| P37802                                                                                                | 2             | 4.1042           | R.GASQAGMTG YGMPR.Q          | 4            | TAGL2_HUMAN          |
| <b><i>Trans-Golgi network integral membrane protein 2 precursor - Homo sapiens (Human)</i></b>        |               |                  |                              |              |                      |
| O43493                                                                                                | 2             | 3.9202           | K.SGAEDQTPKDVPNK.S           | 2            | TGON2_HUMAN          |
| O43493                                                                                                | 2             | 4.3446           | K.SGAEEQGPIDGPSK.S           | 2            | TGON2_HUMAN          |
| O43493                                                                                                | 2             | 3.9433           | K.SSAEAQTPE DTPNK.S          | 3            | TGON2_HUMAN          |
| O43493                                                                                                | 2             | 2.7465           | K.DVPNKSGADGQTPK.D           | 2            | TGON2_HUMAN          |
| O43493                                                                                                | 2             | 4.1916           | K.DGSNKS GAEEQGPIDGPSK.S     | 2            | TGON2_HUMAN          |
| O43493                                                                                                | 2             | 3.3781           | K.ADTNQLADK GK.L             | 2            | TGON2_HUMAN          |
| O43493                                                                                                | 2             | 4.0751           | K.SGAEEQTSKDSPNK.V           | 2            | TGON2_HUMAN          |
| <b><i>Transient receptor potential cation channel subfamily V member 4 - Homo sapiens (Human)</i></b> |               |                  |                              |              |                      |
| Q9HBA0                                                                                                | 2             | 3.8952           | K.GVPNPIDLLESTLYESSVVP GPK.K | 2            | TRPV4_HUMAN          |
| Q9HBA0                                                                                                | 2             | 2.9328           | K.NSNPDEVVPLDSM#GNPR.C       | 1            | TRPV4_HUMAN          |
| <b><i>Transitional endoplasmic reticulum ATPase - Homo sapiens (Human)</i></b>                        |               |                  |                              |              |                      |
| P55072                                                                                                | 2             | 3.2474           | R.GGNIGDGGGAADR.V            | 1            | TERA_HUMAN           |
| P55072                                                                                                | 2             | 3.7776           | R.WALSQSNPSALR.E             | 7            | TERA_HUMAN           |
| P55072                                                                                                | 3             | 4.7546           | R.LIVDEAINEDNSVVSLSQPK.M     | 1            | TERA_HUMAN           |
| P55072                                                                                                | 3             | 5.2952           | R.KYEMFAQTLQQSR.G            | 6            | TERA_HUMAN           |
| P55072                                                                                                | 2             | 3.2473           | K.YEMFAQTLQQSR.G             | 1            | TERA_HUMAN           |
| P55072                                                                                                | 2             | 2.9607           | K.NAPAIIFIDELDAIPK.R         | 1            | TERA_HUMAN           |
| P55072                                                                                                | 2             | 3.2027           | K.MDELQLFR.G                 | 1            | TERA_HUMAN           |
| P55072                                                                                                | 2             | 3.606            | R.LDQLIYIPLPDEK.S            | 2            | TERA_HUMAN           |

| <i>Accession No*</i>                                                                            | <i>Charge</i> | <i>XC(Max)**</i> | <i>Peptide*</i>                  | <i>TC***</i> | <i>Reference No*</i> |
|-------------------------------------------------------------------------------------------------|---------------|------------------|----------------------------------|--------------|----------------------|
| <b><i>Translocated promoter region - Homo sapiens (Human)</i></b>                               |               |                  |                                  |              |                      |
| Q5SWY0                                                                                          | 3             | 5.5495           | R.VELLERELQELQDSLNAER.E          | 1            | Q5SWY0_HUMA          |
| <b><i>Translocation protein SEC62 - Homo sapiens (Human)</i></b>                                |               |                  |                                  |              |                      |
| Q99442                                                                                          | 2             | 3.6957           | R.IQEVGEPKKEEK.A                 | 2            | SEC62_HUMAN          |
| <b><i>Transmembrane and coiled-coil domains protein 3 - Homo sapiens (Human)</i></b>            |               |                  |                                  |              |                      |
| Q9ULS5                                                                                          | 2             | 4.0007           | K.LVNNADKQQAGR.I                 | 2            | TMCC3_HUMAN          |
| Q9ULS5                                                                                          | 2             | 4.1822           | K.SGM#PGVSLTPPVFVFNK.S           | 1            | TMCC3_HUMAN          |
| Q9ULS5                                                                                          | 2             | 2.8415           | K.SGM#PGVSLTPPVFVFNK.S           | 1            | TMCC3_HUMAN          |
| <b><i>Transmembrane emp24 domain-containing protein 10 precursor - Homo sapiens (Human)</i></b> |               |                  |                                  |              |                      |
| P49755                                                                                          | 2             | 3.4539           | R.IPDQLVILDMK.H                  | 1            | TMEDA_HUMAN          |
| <b><i>Transmembrane glycoprotein NMB precursor - Homo sapiens (Human)</i></b>                   |               |                  |                                  |              |                      |
| Q14956                                                                                          | 2             | 4.9204           | K.DVYVVTQIPVFTM#FQK.N            | 3            | GNMB_HUMAN           |
| <b><i>Transmembrane protein 126B - Homo sapiens (Human)</i></b>                                 |               |                  |                                  |              |                      |
| Q8IUX1                                                                                          | 2             | 2.8274           | R.DSGVVPVGTTEEAPK.V              | 1            | T126B_HUMAN          |
| <b><i>Transmembrane protein 131 - Homo sapiens (Human)</i></b>                                  |               |                  |                                  |              |                      |
| Q92545                                                                                          | 2             | 3.6833           | K.LSLQTLNADIFLK.Q                | 2            | TM131_HUMAN          |
| Q92545                                                                                          | 2             | 3.4411           | R.TSAQAASSQSANK.T                | 1            | TM131_HUMAN          |
| <b><i>Transmembrane protein 132E precursor - Homo sapiens (Human)</i></b>                       |               |                  |                                  |              |                      |
| Q6IEE7                                                                                          | 2             | 3.4701           | R.DQAEDPASSPTSK.R                | 3            | T132E_HUMAN          |
| <b><i>Transmembrane protein 81 precursor - Homo sapiens (Human)</i></b>                         |               |                  |                                  |              |                      |
| Q6P7N7                                                                                          | 1             | 2.3566           | R.C*DVQLVK.N                     | 2            | TMM81_HUMAN          |
| <b><i>Transthyretin precursor - Homo sapiens (Human)</i></b>                                    |               |                  |                                  |              |                      |
| P02766                                                                                          | 3             | 4.2695           | K.TSESGELHGLTTEEEFVEGIYKVEIDTK.S | 3            | TTHY_HUMAN           |
| P02766                                                                                          | 2             | 4.2418           | R.YTIAALLSPYSYSTTAVVTNPKE.-      | 8            | TTHY_HUMAN           |
| P02766                                                                                          | 2             | 4.4002           | R.YTIAALLSPYSYSTTAVVTNPKE.E      | 6            | TTHY_HUMAN           |
| P02766                                                                                          | 3             | 5.8443           | R.RYTIAALLSPYSYSTTAVVTNPKE.-     | 6            | TTHY_HUMAN           |
| P02766                                                                                          | 2             | 5.0226           | R.RYTIAALLSPYSYSTTAVVTNPKE.E     | 1            | TTHY_HUMAN           |
| P02766                                                                                          | 2             | 4.62             | R.KAADDTWEPFASGK.T               | 4            | TTHY_HUMAN           |
| P02766                                                                                          | 2             | 4.0128           | R.GSPAINVAVHVFRK.A               | 2            | TTHY_HUMAN           |
| P02766                                                                                          | 2             | 4.188            | R.GSPAINVAVHVFRK.K               | 4            | TTHY_HUMAN           |
| P02766                                                                                          | 3             | 5.5826           | K.VLDAVRGSPAINVAVHVFRK.K         | 2            | TTHY_HUMAN           |
| P02766                                                                                          | 3             | 6.9259           | K.TSESGELHGLTTEEEFVEGIYK.V       | 6            | TTHY_HUMAN           |
| P02766                                                                                          | 3             | 5.4644           | K.ALGISPFHEHAEEVFTANDSGPR.R      | 7            | TTHY_HUMAN           |
| P02766                                                                                          | 2             | 4.1108           | K.AADDTWEPFASGK.T                | 4            | TTHY_HUMAN           |
| P02766                                                                                          | 3             | 4.6646           | K.VLDAVRGSPAINVAVHVFRK.A         | 1            | TTHY_HUMAN           |

| <i>Accession No*</i>                                                            | <i>Charge</i> | <i>XC(Max)**</i> | <i>Peptide*</i>                    | <i>TC***</i> | <i>Reference No*</i> |
|---------------------------------------------------------------------------------|---------------|------------------|------------------------------------|--------------|----------------------|
| <b><i>Treacle protein - Homo sapiens (Human)</i></b>                            |               |                  |                                    |              |                      |
| Q13428                                                                          | 2             | 3.6941           | K.KNPASLPLTQAALK.V                 | 4            | TCOF_HUMAN           |
| Q13428                                                                          | 3             | 5.0813           | R.ISDGKKQEGPATQVSK.K               | 3            | TCOF_HUMAN           |
| Q13428                                                                          | 2             | 3.7846           | K.KQEGPATQVSK.K                    | 5            | TCOF_HUMAN           |
| <b><i>Trichohyalin - Homo sapiens (Human)</i></b>                               |               |                  |                                    |              |                      |
| Q07283                                                                          | 2             | 2.9147           | R.KFREEELLHQEQGR.K                 | 1            | TRHY_HUMAN           |
| <b><i>Trinucleotide repeat containing 5 - Homo sapiens (Human)</i></b>          |               |                  |                                    |              |                      |
| Q9BT09                                                                          | 2             | 2.8554           | K.ASPLTHSPPDEL.-                   | 4            | Q9BT09_HUMAN         |
| Q9BT09                                                                          | 3             | 4.3262           | K.ELGGLEGDPSPPEEDEIQK.A            | 3            | Q9BT09_HUMAN         |
| <b><i>Trinucleotide repeat-containing 6B protein - Homo sapiens (Human)</i></b> |               |                  |                                    |              |                      |
| Q9UPQ9                                                                          | 2             | 3.5558           | K.GMPFGMGLGNTSR.S                  | 2            | TNC6B_HUMAN          |
| Q9UPQ9                                                                          | 2             | 3.0091           | R.STDAPSQSTGDR.K                   | 3            | TNC6B_HUMAN          |
| Q9UPQ9                                                                          | 2             | 3.4299           | K.GGNDSWMMNPLAK.Q                  | 1            | TNC6B_HUMAN          |
| Q9UPQ9                                                                          | 2             | 3.4667           | K.DTESSSENTTDNNSASNPGEK.S          | 2            | TNC6B_HUMAN          |
| Q9UPQ9                                                                          | 2             | 3.9842           | K.DMGTTDSGPYFEK.G                  | 2            | TNC6B_HUMAN          |
| Q9UPQ9                                                                          | 2             | 3.8319           | K.DM#GTTDSGPYFEK.G                 | 3            | TNC6B_HUMAN          |
| Q9UPQ9                                                                          | 2             | 3.3609           | R.STDAPSQSTGDRK.T                  | 2            | TNC6B_HUMAN          |
| <b><i>TRIO and F-actin-binding protein - Homo sapiens (Human)</i></b>           |               |                  |                                    |              |                      |
| Q9H2D6                                                                          | 3             | 4.5925           | K.WFEATDSRTPEVPAGEGPR.R            | 1            | TARA_HUMAN           |
| Q9H2D6                                                                          | 2             | 5.0123           | R.QALDYVELSPLTQASPQR.A             | 2            | TARA_HUMAN           |
| Q9H2D6                                                                          | 2             | 2.8578           | R.TPEVPAGEGPR.R                    | 1            | TARA_HUMAN           |
| <b><i>Triosephosphate isomerase - Homo sapiens (Human)</i></b>                  |               |                  |                                    |              |                      |
| P60174                                                                          | 3             | 5.592            | K.QSLGELIGTLNAAKVPADTEVVCPPTAYIDF  | 1            | TPIS_HUMAN           |
| P60174                                                                          | 2             | 5.1433           | K.VPADTEVVCPPTAYIDFAR.Q            | 1            | TPIS_HUMAN           |
| P60174                                                                          | 4             | 4.7429           | K.VAHALAEGLVACIGEKLDEREAGITEK.V    | 1            | TPIS_HUMAN           |
| P60174                                                                          | 3             | 5.1116           | K.VAHALAEGLVACIGEKLDER.E           | 1            | TPIS_HUMAN           |
| P60174                                                                          | 2             | 5.8616           | R.KQSLGELIGTLNAAK.V                | 7            | TPIS_HUMAN           |
| P60174                                                                          | 2             | 5.4677           | K.QSLGELIGTLNAAK.V                 | 5            | TPIS_HUMAN           |
| P60174                                                                          | 3             | 3.7051           | K.ELASQPDVDGFLVGGASLKPEFVDIINAKQ.- | 1            | TPIS_HUMAN           |
| P60174                                                                          | 3             | 3.7866           | K.ELASQPDVDGFLVGGASLKPEFVDIINAK.Q  | 1            | TPIS_HUMAN           |
| P60174                                                                          | 2             | 6.2861           | K.VAHALAEGLVACIGEK.L               | 8            | TPIS_HUMAN           |
| P60174                                                                          | 2             | 3.7995           | K.TATPQQAQEVHEK.L                  | 7            | TPIS_HUMAN           |
| <b><i>TRIP12 protein - Homo sapiens (Human)</i></b>                             |               |                  |                                    |              |                      |
| Q14CA3                                                                          | 3             | 4.2468           | K.ALQHTESPSETNKPFSK.S              | 4            | Q14CA3_HUMA          |
| Q14CA3                                                                          | 2             | 4.2546           | R.NTAGAQPQDDSIGGR.S                | 2            | Q14CA3_HUMA          |

| <i>Accession No*</i>                                                        | <i>Charge</i> | <i>XC(Max)**</i> | <i>Peptide*</i>               | <i>TC***</i> | <i>Reference No*</i> |
|-----------------------------------------------------------------------------|---------------|------------------|-------------------------------|--------------|----------------------|
| <b><i>Tripartite motif-containing protein 25 - Homo sapiens (Human)</i></b> |               |                  |                               |              |                      |
| Q14258                                                                      | 3             | 5.0921           | K.KPPVPALPSKLPFTGAPEQLVDLK.Q  | 2            | TRI25_HUMAN          |
| Q14258                                                                      | 2             | 4.3959           | K.LPFTGAPEQLVDLK.Q            | 3            | TRI25_HUMAN          |
| <b><i>Tripartite motif-containing protein 65 - Homo sapiens (Human)</i></b> |               |                  |                               |              |                      |
| Q6PJ69                                                                      | 2             | 3.3944           | R.DPGPDPGPGPDPAAR.C           | 1            | TRI65_HUMAN          |
| <b><i>Tripartite motif-containing protein 68 - Homo sapiens (Human)</i></b> |               |                  |                               |              |                      |
| Q6AZZ1                                                                      | 1             | 2.1052           | K.EQEEAWK.L                   | 1            | TRI68_HUMAN          |
| <b><i>Tripeptidyl-peptidase 1 precursor - Homo sapiens (Human)</i></b>      |               |                  |                               |              |                      |
| O14773                                                                      | 2             | 3.1097           | R.PSYQEEAVTK.F                | 1            | TPP1_HUMAN           |
| <b><i>Triple functional domain protein - Homo sapiens (Human)</i></b>       |               |                  |                               |              |                      |
| O75962                                                                      | 3             | 3.9003           | K.SADAGSQKSDSDSAATPQDETVEER.G | 2            | TRIO_HUMAN           |
| <b><i>tRNA-dihydrouridine synthase 3-like - Homo sapiens (Human)</i></b>    |               |                  |                               |              |                      |
| Q96G46                                                                      | 3             | 3.8612           | R.LEDGQTADGQTEEAEPGEQLQTQKR.A | 1            | DUS3L_HUMAN          |
| <b><i>Tropomodulin-2 - Homo sapiens (Human)</i></b>                         |               |                  |                               |              |                      |
| Q9NZR1                                                                      | 2             | 2.8299           | K.FDEETANNK.G                 | 1            | TMOD2_HUMAN          |
| Q9NZR1                                                                      | 2             | 2.9535           | K.FGYQFTK.Q                   | 2            | TMOD2_HUMAN          |
| Q9NZR1                                                                      | 3             | 4.2277           | K.VKPVFEEPPNPTNVEISLQQMK.A    | 1            | TMOD2_HUMAN          |
| Q9NZR1                                                                      | 2             | 4.0878           | R.SNDPVAIAFADMLK.V            | 1            | TMOD2_HUMAN          |
| <b><i>Tropomodulin-3 - Homo sapiens (Human)</i></b>                         |               |                  |                               |              |                      |
| Q9NYL9                                                                      | 3             | 5.7276           | K.YKDLDEDELLGNLSETLK.Q        | 2            | TMOD3_HUMAN          |
| Q9NYL9                                                                      | 3             | 3.7751           | K.QLETVLDDLDPENALLPAGFR.Q     | 1            | TMOD3_HUMAN          |
| Q9NYL9                                                                      | 3             | 4.9801           | R.TKENDAHLVEVNLNNIK.N         | 1            | TMOD3_HUMAN          |
| Q9NYL9                                                                      | 2             | 2.9866           | R.SNDPVATAFAEMLK.V            | 1            | TMOD3_HUMAN          |
| Q9NYL9                                                                      | 2             | 4.1386           | K.FGYQFTQQGPR.T               | 6            | TMOD3_HUMAN          |
| Q9NYL9                                                                      | 2             | 3.3055           | K.MLEENTNILK.F                | 2            | TMOD3_HUMAN          |
| Q9NYL9                                                                      | 2             | 3.0793           | K.ILPVFDEPPNPTNVEESLKR.T      | 2            | TMOD3_HUMAN          |
| Q9NYL9                                                                      | 2             | 3.3758           | R.QQLGTAVELEMAK.M             | 2            | TMOD3_HUMAN          |
| <b><i>Tropomyosin 1 alpha variant 6 - Homo sapiens (Human)</i></b>          |               |                  |                               |              |                      |
| Q1ZYL5                                                                      | 2             | 3.0568           | R.SLQEQADAAEERAGTLQR.E        | 1            | Q1ZYL5_HUMAN         |
| Q1ZYL5                                                                      | 3             | 5.4717           | K.IRSLQEQADAAEER.A            | 3            | Q1ZYL5_HUMAN         |
| Q1ZYL5                                                                      | 2             | 5.3891           | K.LRETAEADVASLNR.R            | 6            | Q1ZYL5_HUMAN         |
| Q1ZYL5                                                                      | 2             | 2.9985           | K.LRETAEADVASLNR.R.I          | 2            | Q1ZYL5_HUMAN         |
| Q1ZYL5                                                                      | 2             | 4.4036           | R.ETAADVASLNR.R               | 10           | Q1ZYL5_HUMAN         |
| Q1ZYL5                                                                      | 2             | 4.7687           | R.KLRETAEADVASLNR.R           | 7            | Q1ZYL5_HUMAN         |
| Q1ZYL5                                                                      | 2             | 4.6303           | R.SLQEQADAAEER.A              | 9            | Q1ZYL5_HUMAN         |

| <i>Accession No*</i>                                                           | <i>Charge</i> | <i>XC(Max)**</i> | <i>Peptide*</i>                     | <i>TC***</i> | <i>Reference No*</i> |
|--------------------------------------------------------------------------------|---------------|------------------|-------------------------------------|--------------|----------------------|
| <b><i>Tropomyosin 2 - Homo sapiens (Human)</i></b>                             |               |                  |                                     |              |                      |
| Q5TCU3                                                                         | 3             | 4.6005           | K.TIDDLEETLASAKEENVEIHQTLDQTLLELNNL | 1            | Q5TCU3_HUMA          |
| <b><i>Tropomyosin 3 - Homo sapiens (Human)</i></b>                             |               |                  |                                     |              |                      |
| Q5VU72                                                                         | 3             | 4.2369           | K.TIDDLEERLYSQLER.N                 | 1            | Q5VU72_HUMA          |
| <b><i>Tropomyosin alpha-4 chain - Homo sapiens (Human)</i></b>                 |               |                  |                                     |              |                      |
| P67936                                                                         | 2             | 5.4951           | K.IQALQQQADEAEDR.A                  | 6            | TPM4_HUMAN           |
| P67936                                                                         | 2             | 4.3497           | R.KLVILEGELERAER.A                  | 5            | TPM4_HUMAN           |
| P67936                                                                         | 3             | 5.2425           | R.KIQALQQQADEADRAQGLQR.E            | 9            | TPM4_HUMAN           |
| P67936                                                                         | 2             | 4.8558           | K.YSEKEDKYEEEIK.L                   | 2            | TPM4_HUMAN           |
| P67936                                                                         | 2             | 6.16             | R.KIQALQQQADEAEDR.A                 | 12           | TPM4_HUMAN           |
| P67936                                                                         | 3             | 3.7239           | R.REKAEGDVAALNR.R                   | 1            | TPM4_HUMAN           |
| P67936                                                                         | 2             | 3.6085           | R.EKAEGDVAALNR.R                    | 2            | TPM4_HUMAN           |
| P67936                                                                         | 1             | 2.1192           | R.AQGLQR.E                          | 2            | TPM4_HUMAN           |
| P67936                                                                         | 3             | 6.0048           | R.AEVSELKCGDLEEEELKNVTNNLK.S        | 1            | TPM4_HUMAN           |
| P67936                                                                         | 3             | 4.2417           | R.AEERAIEVSELK.C                    | 4            | TPM4_HUMAN           |
| P67936                                                                         | 2             | 5.2024           | K.TIDDLEEKLAQAK.E                   | 9            | TPM4_HUMAN           |
| P67936                                                                         | 1             | 3.1782           | K.TIDDLEEK.L                        | 4            | TPM4_HUMAN           |
| P67936                                                                         | 1             | 3.0588           | K.SLEAASEK.Y                        | 19           | TPM4_HUMAN           |
| P67936                                                                         | 2             | 3.8135           | K.RKIQALQQQADEAEDR.A                | 4            | TPM4_HUMAN           |
| P67936                                                                         | 2             | 3.608            | K.LVILEGELERAER.A                   | 6            | TPM4_HUMAN           |
| P67936                                                                         | 3             | 4.492            | K.IQALQQQADEADRAQGLQR.E             | 6            | TPM4_HUMAN           |
| P67936                                                                         | 2             | 3.1095           | K.EENVGLHQTLDQTLNELNCI.-            | 1            | TPM4_HUMAN           |
| P67936                                                                         | 1             | 4.1357           | K.AEGDVAALNR.R                      | 7            | TPM4_HUMAN           |
| P67936                                                                         | 2             | 4.1076           | K.LLSDKLKEAETR.A                    | 4            | TPM4_HUMAN           |
| P67936                                                                         | 3             | 5.5484           | K.TIDDLEEKLAQAKEENVGLHQTLDQTLNELNC  | 3            | TPM4_HUMAN           |
| <b><i>Tropomyosin beta chain - Homo sapiens (Human)</i></b>                    |               |                  |                                     |              |                      |
| P07951                                                                         | 2             | 3.6116           | K.TIDDLEDEVYAQK.M                   | 2            | TPM2_HUMAN           |
| P07951                                                                         | 2             | 2.7876           | K.YKAISEELDNALNDITSL.-              | 3            | TPM2_HUMAN           |
| <b><i>Tryptophanyl-tRNA synthetase, cytoplasmic - Homo sapiens (Human)</i></b> |               |                  |                                     |              |                      |
| P23381                                                                         | 2             | 4.6536           | K.AGNASKDEIDSAVK.M                  | 2            | SYWC_HUMAN           |
| <b><i>TSC22 domain family protein 1 - Homo sapiens (Human)</i></b>             |               |                  |                                     |              |                      |
| Q15714                                                                         | 3             | 4.4431           | R.LDNSSSGASVVAIDNKIEQAMDVK.S        | 2            | T22D1_HUMAN          |
| <b><i>TSC22 domain family protein 2 - Homo sapiens (Human)</i></b>             |               |                  |                                     |              |                      |
| O75157                                                                         | 2             | 3.4393           | R.HSSTFDQTAER.D                     | 2            | T22D2_HUMAN          |
| O75157                                                                         | 2             | 3.4024           | R.NSLLERENALLK.S                    | 2            | T22D2_HUMAN          |

| <i>Accession No*</i>                                                                          | <i>Charge</i> | <i>XC(Max)**</i> | <i>Peptide*</i>                | <i>TC***</i> | <i>Reference No*</i> |
|-----------------------------------------------------------------------------------------------|---------------|------------------|--------------------------------|--------------|----------------------|
| <b><i>TSC22 domain family protein 4 - Homo sapiens (Human)</i></b>                            |               |                  |                                |              |                      |
| Q9Y3Q8                                                                                        | 2             | 3.0825           | R.NAALEQENGLLR.A               | 2            | T22D4_HUMAN          |
| Q9Y3Q8                                                                                        | 2             | 3.0484           | R.VEAEAGGSGAR.T                | 2            | T22D4_HUMAN          |
| <b><i>TSC22 domain family, member 3 - Homo sapiens (Human)</i></b>                            |               |                  |                                |              |                      |
| Q5JRI9                                                                                        | 2             | 3.2477           | R.GSSGENNNPGSPTVSNFR.Q         | 1            | Q5JRI9_HUMAN         |
| <b><i>TSPY-like 5 - Homo sapiens (Human)</i></b>                                              |               |                  |                                |              |                      |
| Q86VY4                                                                                        | 3             | 4.1822           | R.AAGDHGQAAARPGPGK.A           | 2            | Q86VY4_HUMA          |
| <b><i>TTD non-photosensitive 1 protein - Homo sapiens (Human)</i></b>                         |               |                  |                                |              |                      |
| Q8TAP9                                                                                        | 3             | 6.0314           | R.SPAGSQQFGYSPGQQQTHPQGSPR.T   | 2            | TTDN1_HUMAN          |
| <b><i>TUBB6 protein - Homo sapiens (Human)</i></b>                                            |               |                  |                                |              |                      |
| Q2NKY5                                                                                        | 2             | 2.7615           | R.AALVDLEPGTMDSVR.S            | 2            | Q2NKY5_HUMA          |
| <b><i>Tubulin alpha-4A chain - Homo sapiens (Human)</i></b>                                   |               |                  |                                |              |                      |
| P68366                                                                                        | 2             | 3.5618           | R.AVFDLEPTVIDEIR.N             | 4            | TBA4A_HUMAN          |
| <b><i>Tubulin beta chain - Homo sapiens (Human)</i></b>                                       |               |                  |                                |              |                      |
| P07437                                                                                        | 3             | 6.3244           | K.FWEVISDEHGIDPTGTYHGDSLQLDR.I | 1            | TBB5_HUMAN           |
| <b><i>Tubulin beta-2C chain - Homo sapiens (Human)</i></b>                                    |               |                  |                                |              |                      |
| P68371                                                                                        | 2             | 3.79             | R.INVYYNEATGGK.Y               | 4            | TBB2C_HUMAN          |
| <b><i>Tubulin folding cofactor B - Homo sapiens (Human)</i></b>                               |               |                  |                                |              |                      |
| Q99426                                                                                        | 2             | 3.2734           | R.AQQEAAEAQR.L                 | 2            | TBCB_HUMAN           |
| <b><i>Tubulin polymerization-promoting protein - Homo sapiens (Human)</i></b>                 |               |                  |                                |              |                      |
| O94811                                                                                        | 3             | 5.4448           | K.AGRVDLVDESGYVSGYK.H          | 2            | TPPP_HUMAN           |
| O94811                                                                                        | 2             | 3.9589           | R.TITFEQFQEALEELAK.K           | 1            | TPPP_HUMAN           |
| O94811                                                                                        | 2             | 4.3348           | R.VDLVDESGYVSGYK.H             | 4            | TPPP_HUMAN           |
| <b><i>Tubulin polymerization-promoting protein family member 3 - Homo sapiens (Human)</i></b> |               |                  |                                |              |                      |
| Q9BW30                                                                                        | 2             | 5.6594           | K.GIAGRQDILDDSGYVSAYK.N        | 6            | TPPP3_HUMAN          |
| Q9BW30                                                                                        | 2             | 2.7648           | K.ALEELATKR.F                  | 1            | TPPP3_HUMAN          |
| Q9BW30                                                                                        | 2             | 4.1436           | K.SVTGTDVDIVFSK.V              | 5            | TPPP3_HUMAN          |
| Q9BW30                                                                                        | 2             | 2.945            | K.TGGAVDRLTDTSR.Y              | 1            | TPPP3_HUMAN          |
| Q9BW30                                                                                        | 2             | 3.9765           | R.QDILDDSGYVSAYK.N             | 4            | TPPP3_HUMAN          |
| Q9BW30                                                                                        | 2             | 3.3888           | R.VINYEEFKK.A                  | 4            | TPPP3_HUMAN          |
| Q9BW30                                                                                        | 3             | 6.8721           | K.SKEEAFDAICQLVAGKEPANVGVTK.A  | 11           | TPPP3_HUMAN          |
| <b><i>Tubulin-specific chaperone A - Homo sapiens (Human)</i></b>                             |               |                  |                                |              |                      |
| O75347                                                                                        | 2             | 4.391            | K.MRAEDGENYDIKK.Q              | 10           | TBCA_HUMAN           |
| O75347                                                                                        | 3             | 4.6429           | R.RLEAAAYLDLQR.I               | 10           | TBCA_HUMAN           |
| O75347                                                                                        | 1             | 3.5868           | R.LVLDSVKLEA.-                 | 9            | TBCA_HUMAN           |



| <i>Accession No*</i>                                                                     | <i>Charge</i> | <i>XC(Max)**</i> | <i>Peptide*</i>                   | <i>TC***</i> | <i>Reference No*</i> |
|------------------------------------------------------------------------------------------|---------------|------------------|-----------------------------------|--------------|----------------------|
| O75347                                                                                   | 2             | 4.0991           | R.LEAAYLDLQR.I                    | 4            | TBCA_HUMAN           |
| O75347                                                                                   | 3             | 6.5155           | R.ILENEKDLEEAEYKEAR.L             | 9            | TBCA_HUMAN           |
| O75347                                                                                   | 3             | 4.4605           | R.ILENEKDLEEAEYK.E                | 2            | TBCA_HUMAN           |
| O75347                                                                                   | 2             | 3.4023           | R.AEDGENYDIK.K                    | 1            | TBCA_HUMAN           |
| O75347                                                                                   | 2             | 2.9606           | K.QAEILQESR.M                     | 2            | TBCA_HUMAN           |
| O75347                                                                                   | 2             | 3.3399           | K.MRAEDGENYDIK.K                  | 1            | TBCA_HUMAN           |
| O75347                                                                                   | 3             | 4.3195           | K.M#RAEDGENYDIKK.Q                | 2            | TBCA_HUMAN           |
| O75347                                                                                   | 2             | 3.7482           | K.KQAEILQESR.M                    | 3            | TBCA_HUMAN           |
| O75347                                                                                   | 2             | 3.0793           | K.EAKQEEKIEK.M                    | 2            | TBCA_HUMAN           |
| O75347                                                                                   | 2             | 2.9807           | K.VMYEKEAK.Q                      | 1            | TBCA_HUMAN           |
| <b><i>Tubulointerstitial nephritis antigen - Homo sapiens (Human)</i></b>                |               |                  |                                   |              |                      |
| Q9UJW2                                                                                   | 2             | 3.5934           | R.HGCNSGSIDR.A                    | 2            | TINAG_HUMAN          |
| <b><i>Tubulointerstitial nephritis antigen-like precursor - Homo sapiens (Human)</i></b> |               |                  |                                   |              |                      |
| Q9GZM7                                                                                   | 2             | 3.6403           | R.IYPVLGTYWDNCNR.C                | 1            | TINAL_HUMAN          |
| <b><i>Tudor domain-containing protein 3 - Homo sapiens (Human)</i></b>                   |               |                  |                                   |              |                      |
| Q9H7E2                                                                                   | 2             | 3.7335           | K.HFNVNTDYQNPVR.S                 | 1            | TDRD3_HUMAN          |
| Q9H7E2                                                                                   | 2             | 3.3391           | R.SNLNM#NAAGNR.N                  | 2            | TDRD3_HUMAN          |
| <b><i>Tuftelin-interacting protein 11 - Homo sapiens (Human)</i></b>                     |               |                  |                                   |              |                      |
| Q9UBB9                                                                                   | 2             | 3.1163           | K.NAQGIINPIEAK.Q                  | 1            | TFP11_HUMAN          |
| Q9UBB9                                                                                   | 2             | 3.1145           | K.TGGNFKPSQK.G                    | 2            | TFP11_HUMAN          |
| <b><i>Tumor suppressor candidate 1 - Homo sapiens (Human)</i></b>                        |               |                  |                                   |              |                      |
| Q2TAM9                                                                                   | 3             | 3.7721           | R.RVPEEASTNRR.A                   | 1            | Q2TAM9_HUMA          |
| <b><i>Tumor suppressor p53-binding protein 1 - Homo sapiens (Human)</i></b>              |               |                  |                                   |              |                      |
| Q12888                                                                                   | 2             | 4.6508           | R.ADDPLRLDQELQQPQTQEK.T           | 3            | TP53B_HUMAN          |
| Q12888                                                                                   | 3             | 5.6684           | R.KVTEETEPIVECQECETEVSPTSQTGGSSGD | 1            | TP53B_HUMAN          |
| Q12888                                                                                   | 2             | 3.8784           | K.TSNSLTEDSK.M                    | 2            | TP53B_HUMAN          |
| Q12888                                                                                   | 2             | 2.9034           | K.SPEPEVLSTQEDLFDQSNK.T           | 1            | TP53B_HUMAN          |
| Q12888                                                                                   | 2             | 3.0621           | K.QDATVQTER.G                     | 1            | TP53B_HUMAN          |
| Q12888                                                                                   | 2             | 3.7941           | K.LMLSTSEYSQSPK.M                 | 2            | TP53B_HUMAN          |
| Q12888                                                                                   | 2             | 3.471            | K.LM#LSTSEYSQSPK.M                | 2            | TP53B_HUMAN          |
| Q12888                                                                                   | 2             | 4.4948           | K.EQLSAQELMESGLQIQK.S             | 2            | TP53B_HUMAN          |
| Q12888                                                                                   | 2             | 3.6938           | R.VPETVSAATQTIK.N                 | 2            | TP53B_HUMAN          |
| <b><i>Twinfilin-1 - Homo sapiens (Human)</i></b>                                         |               |                  |                                   |              |                      |
| Q12792                                                                                   | 1             | 2.1924           | R.GPAETEATTD.-                    | 2            | TWF1_HUMAN           |
| <b><i>Twisted gastrulation protein homolog 1 precursor - Homo sapiens (Human)</i></b>    |               |                  |                                   |              |                      |

| <i>Accession No*</i>                                                                   | <i>Charge</i> | <i>XC(Max)**</i> | <i>Peptide*</i>                  | <i>TC***</i> | <i>Reference No*</i> |
|----------------------------------------------------------------------------------------|---------------|------------------|----------------------------------|--------------|----------------------|
| Q9GZX9                                                                                 | 3             | 3.7687           | K.STVEELHEPIPSLFR.A              | 1            | TWSG1_HUMAN          |
| <b><i>Tyrosine-protein kinase ABL2 - Homo sapiens (Human)</i></b>                      |               |                  |                                  |              |                      |
| P42684                                                                                 | 3             | 6.0797           | R.TPSGDLAITEKDPPGVGVAGVAAAPK.G   | 2            | ABL2_HUMAN           |
| <b><i>Tyrosine-protein kinase receptor - Homo sapiens (Human)</i></b>                  |               |                  |                                  |              |                      |
| Q86W07                                                                                 | 2             | 3.364            | K.GPGQNVAVTR.A                   | 2            | Q86W07_HUMA          |
| Q5VTU6                                                                                 | 2             | 3.0975           | K.TGVSIQVAVKM#LKEK.A             | 2            | Q5VTU6_HUMA          |
| <b><i>Tyrosine-protein kinase SgK269 - Homo sapiens (Human)</i></b>                    |               |                  |                                  |              |                      |
| Q9H792                                                                                 | 2             | 2.7613           | K.SAPTSPTATNISSK.T               | 2            | SG269_HUMAN          |
| Q9H792                                                                                 | 2             | 2.8398           | R.TDQAAVM#EK.G                   | 1            | SG269_HUMAN          |
| Q9H792                                                                                 | 2             | 2.8206           | R.TDQAAVMEK.G                    | 2            | SG269_HUMAN          |
| Q9H792                                                                                 | 2             | 4.978            | K.VPIVINPNAYDNLAIYK.S            | 3            | SG269_HUMAN          |
| Q9H792                                                                                 | 2             | 4.3661           | K.IEGTQESQM#VGSSTR.E             | 3            | SG269_HUMAN          |
| Q9H792                                                                                 | 3             | 4.1718           | K.ASTDVAGQAVTINLVPTEEQAKPYR.V    | 1            | SG269_HUMAN          |
| Q9H792                                                                                 | 2             | 2.8631           | K.GFSNSTEHKR.G                   | 1            | SG269_HUMAN          |
| Q9H792                                                                                 | 3             | 4.8042           | K.NAIKVIVINPNAYDNLAIYK.S         | 1            | SG269_HUMAN          |
| <b><i>Tyrosine-protein phosphatase non-receptor type 11 - Homo sapiens (Human)</i></b> |               |                  |                                  |              |                      |
| Q06124                                                                                 | 2             | 3.3801           | R.VYENVGLMQQK.S                  | 1            | PTN11_HUMAN          |
| <b><i>Tyrosine-protein phosphatase non-receptor type 12 - Homo sapiens (Human)</i></b> |               |                  |                                  |              |                      |
| Q05209                                                                                 | 3             | 5.0656           | R.EQISENPTEATDIGFGR.C            | 3            | PTN12_HUMAN          |
| Q05209                                                                                 | 3             | 4.0423           | R.TPESFVLASEHNTPVRSEWSELQSQR.S   | 1            | PTN12_HUMAN          |
| Q05209                                                                                 | 3             | 4.2451           | R.HNIAGTTHSGAEK.D                | 1            | PTN12_HUMAN          |
| Q05209                                                                                 | 2             | 4.8118           | K.STELPGKNESTIEQIDK.K            | 2            | PTN12_HUMAN          |
| Q05209                                                                                 | 2             | 3.1165           | K.SFDGNTLLNR.G                   | 1            | PTN12_HUMAN          |
| Q05209                                                                                 | 2             | 4.0448           | R.SEWSELQSQR.S                   | 5            | PTN12_HUMAN          |
| <b><i>U1 small nuclear ribonucleoprotein 70 kDa - Homo sapiens (Human)</i></b>         |               |                  |                                  |              |                      |
| P08621                                                                                 | 3             | 5.15             | K.EELRGGGGDMAEPSEAGDAPPDDGPPGELG | 1            | RU17_HUMAN           |
| P08621                                                                                 | 2             | 3.4234           | R.RLGGGLGGTR.R                   | 3            | RU17_HUMAN           |
| P08621                                                                                 | 3             | 3.7949           | R.YDERPGPSPLPHR.D                | 1            | RU17_HUMAN           |
| P08621                                                                                 | 2             | 2.7595           | R.VNYDTTESK.L                    | 2            | RU17_HUMAN           |
| P08621                                                                                 | 2             | 3.2145           | R.RQQEVETELK.M                   | 4            | RU17_HUMAN           |
| P08621                                                                                 | 2             | 3.3945           | R.RGGADVNIH.H                    | 5            | RU17_HUMAN           |
| P08621                                                                                 | 2             | 5.1144           | R.GGGGGQDNGLEGLGNSR.D            | 4            | RU17_HUMAN           |
| P08621                                                                                 | 3             | 5.2015           | R.GGGGDMAEPSEAGDAPPDDGPPGELGPDG  | 2            | RU17_HUMAN           |
| P08621                                                                                 | 3             | 4.6588           | R.GGGGDM#AEPSEAGDAPPDDGPPGELGPD  | 2            | RU17_HUMAN           |
| P08621                                                                                 | 3             | 4.5063           | R.GGGGDM#AEPSEAGDAPPDDGPPGELGPD  | 1            | RU17_HUMAN           |

| <i>Accession No*</i>                                                                        | <i>Charge</i> | <i>XC(Max)**</i> | <i>Peptide*</i>                  | <i>TC***</i> | <i>Reference No*</i> |
|---------------------------------------------------------------------------------------------|---------------|------------------|----------------------------------|--------------|----------------------|
| <b><i>U1 small nuclear ribonucleoprotein A - Homo sapiens (Human)</i></b>                   |               |                  |                                  |              |                      |
| P09012                                                                                      | 3             | 4.2837           | K.KAVQGGGATPVVGAVQGPVPGM#PPM#TQA | 1            | SNRPA_HUMAN          |
| P09012                                                                                      | 3             | 5.7952           | K.KAVQGGGATPVVGAVQGPVPGMPPMTQAP  | 3            | SNRPA_HUMAN          |
| <b><i>U2 small nuclear ribonucleoprotein A' - Homo sapiens (Human)</i></b>                  |               |                  |                                  |              |                      |
| P09661                                                                                      | 3             | 5.3283           | K.GGSPSPGDVEAIKNAIANASTLAEVER.L  | 3            | RU2A_HUMAN           |
| <b><i>U2 small nuclear ribonucleoprotein B'' - Homo sapiens (Human)</i></b>                 |               |                  |                                  |              |                      |
| P08579                                                                                      | 3             | 4.3452           | R.LVPGRHDIAFVEFENDGQAGAAR.D      | 2            | RU2B_HUMAN           |
| P08579                                                                                      | 2             | 3.5147           | K.TVEQTATTTNK.K                  | 4            | RU2B_HUMAN           |
| <b><i>U2-associated protein SR140 - Homo sapiens (Human)</i></b>                            |               |                  |                                  |              |                      |
| O15042                                                                                      | 3             | 7.3452           | R.SSDVHSSGSSDAHMDASGPSDSMDPSR.T  | 1            | SR140_HUMAN          |
| <b><i>U3 small nucleolar ribonucleoprotein protein MPP10 - Homo sapiens (Human)</i></b>     |               |                  |                                  |              |                      |
| O00566                                                                                      | 2             | 3.8584           | K.TAEENPEHVEIQK.M                | 1            | MPP10_HUMAN          |
| <b><i>U3 small nucleolar RNA-associated protein 14 homolog A - Homo sapiens (Human)</i></b> |               |                  |                                  |              |                      |
| Q9BVJ6                                                                                      | 2             | 3.563            | K.DSGSQEVLSELR.V                 | 1            | UT14A_HUMAN          |
| Q9BVJ6                                                                                      | 2             | 3.0059           | K.LVLADLLEPVK.T                  | 2            | UT14A_HUMAN          |
| Q9BVJ6                                                                                      | 3             | 5.7014           | R.KVNPAAALEELEKIEK.A             | 1            | UT14A_HUMAN          |
| Q9BVJ6                                                                                      | 3             | 5.1047           | R.SELSQDAEPAGSQETKDSGSQEVLSELR.V | 1            | UT14A_HUMAN          |
| <b><i>U4/U6 small nuclear ribonucleoprotein Prp31 - Homo sapiens (Human)</i></b>            |               |                  |                                  |              |                      |
| Q8WWY3                                                                                      | 2             | 3.0478           | K.YFSSM#AEFLK.V                  | 4            | PRP31_HUMAN          |
| Q8WWY3                                                                                      | 2             | 2.7358           | K.YFSSMAEFLK.V                   | 1            | PRP31_HUMAN          |
| Q8WWY3                                                                                      | 2             | 3.5333           | R.VRQTQVNEATK.A                  | 2            | PRP31_HUMAN          |
| <b><i>U4/U6.U5 tri-snRNP-associated protein 1 - Homo sapiens (Human)</i></b>                |               |                  |                                  |              |                      |
| O43290                                                                                      | 3             | 4.6876           | R.GEKEAAGTTAAAGTGGATEQPPR.H      | 2            | SNUT1_HUMAN          |
| O43290                                                                                      | 2             | 3.6204           | R.RQDLYSAR.D                     | 2            | SNUT1_HUMAN          |
| O43290                                                                                      | 2             | 3.0692           | R.ADDLLPLGDQTQDGFSGSR.L          | 1            | SNUT1_HUMAN          |
| O43290                                                                                      | 2             | 3.1934           | K.TSSGDASSLSIEETNKLR.A           | 1            | SNUT1_HUMAN          |
| O43290                                                                                      | 2             | 4.0483           | R.DDGYEAAASSK.T                  | 8            | SNUT1_HUMAN          |
| O43290                                                                                      | 3             | 4.1951           | K.KPDYLPYAEDESVDLAQQKPR.S        | 1            | SNUT1_HUMAN          |
| O43290                                                                                      | 2             | 3.3883           | R.DSGEKVVEIVK.K                  | 4            | SNUT1_HUMAN          |
| O43290                                                                                      | 2             | 3.3639           | R.LASEYLTPEEMVTFKK.T             | 1            | SNUT1_HUMAN          |
| O43290                                                                                      | 2             | 3.4209           | R.LEQGGTADGLR.E                  | 1            | SNUT1_HUMAN          |
| O43290                                                                                      | 2             | 3.1479           | R.LEQGGTADGLRER.E                | 2            | SNUT1_HUMAN          |
| O43290                                                                                      | 2             | 3.492            | R.LQAQSLSTVGPR.L                 | 2            | SNUT1_HUMAN          |
| O43290                                                                                      | 2             | 2.9176           | R.QLQLQLLR.D                     | 2            | SNUT1_HUMAN          |
| O43290                                                                                      | 2             | 2.9672           | K.TSSGDASSLSIEETNK.L             | 1            | SNUT1_HUMAN          |

| <i>Accession No*</i>                                                                                          | <i>Charge</i> | <i>XC(Max)**</i> | <i>Peptide*</i>                | <i>TC***</i> | <i>Reference No*</i> |
|---------------------------------------------------------------------------------------------------------------|---------------|------------------|--------------------------------|--------------|----------------------|
| O43290                                                                                                        | 2             | 4.5425           | R.LRQLQQLQQLR.D                | 2            | SNUT1_HUMAN          |
| O43290                                                                                                        | 3             | 4.5346           | K.EAGTKEEPVTADVINPM#ALR.Q      | 1            | SNUT1_HUMAN          |
| O43290                                                                                                        | 3             | 4.9555           | K.LGLKPLEVNAIKK.E              | 3            | SNUT1_HUMAN          |
| O43290                                                                                                        | 2             | 5.2918           | K.EAAGTTAAAGTGGATEQPPR.H       | 5            | SNUT1_HUMAN          |
| O43290                                                                                                        | 2             | 4.9552           | K.EAGTKEEPVTADVINPMALR.Q       | 4            | SNUT1_HUMAN          |
| O43290                                                                                                        | 3             | 5.5724           | K.IKTLGEDDPWLDDTAAWIER.S       | 3            | SNUT1_HUMAN          |
| O43290                                                                                                        | 2             | 3.1764           | K.KLDEEALLK.K                  | 2            | SNUT1_HUMAN          |
| O43290                                                                                                        | 2             | 3.946            | K.TPYIVLSGSGK.S                | 2            | SNUT1_HUMAN          |
| O43290                                                                                                        | 3             | 3.8177           | K.LGLKPLEVNAIK.K               | 1            | SNUT1_HUMAN          |
| O43290                                                                                                        | 2             | 4.3955           | K.RDDGYEAAASSK.T               | 5            | SNUT1_HUMAN          |
| O43290                                                                                                        | 4             | 5.7988           | K.DKGVLQEEEDVLVNVNLVDKER.A     | 4            | SNUT1_HUMAN          |
| O43290                                                                                                        | 2             | 3.0832           | K.SM#NANTITK.-                 | 1            | SNUT1_HUMAN          |
| O43290                                                                                                        | 2             | 2.7696           | K.SM#NANTITK.-                 | 3            | SNUT1_HUMAN          |
| O43290                                                                                                        | 2             | 2.8657           | K.KLDEEALLKK.M                 | 1            | SNUT1_HUMAN          |
| <b><i>U4/U6.U5 tri-snRNP-associated protein 3 - Homo sapiens (Human)</i></b>                                  |               |                  |                                |              |                      |
| Q8WVK2                                                                                                        | 2             | 3.5041           | K.LMGFASFSTK.G                 | 3            | SNUT3_HUMAN          |
| <b><i>U5 small nuclear ribonucleoprotein 200 kDa helicase - Homo sapiens (Human)</i></b>                      |               |                  |                                |              |                      |
| O75643                                                                                                        | 1             | 2.2765           | R.SLQYEQ.A                     | 2            | U520_HUMAN           |
| <b><i>U6 snRNA-associated Sm-like protein LSM3 - Homo sapiens (Human)</i></b>                                 |               |                  |                                |              |                      |
| P62310                                                                                                        | 2             | 3.8902           | R.GDGVVLVAPPLRVG.-             | 7            | LSM3_HUMAN           |
| <b><i>Ubinuclein - Homo sapiens (Human)</i></b>                                                               |               |                  |                                |              |                      |
| Q9NPG3                                                                                                        | 3             | 4.1529           | K.LLTSPSLKPSAVSSVTSSTLSK.G     | 1            | UBN1_HUMAN           |
| <b><i>Ubiquilin-2 - Homo sapiens (Human)</i></b>                                                              |               |                  |                                |              |                      |
| Q9UHD9                                                                                                        | 2             | 5.0493           | R.GPAAAQGSAAAPAEPK.I           | 4            | UBQL2_HUMAN          |
| <b><i>Ubiquinol-cytochrome c reductase complex 11 kDa protein, mitochondrial precursor - Homo sapiens</i></b> |               |                  |                                |              |                      |
| P07919                                                                                                        | 3             | 5.4962           | R.SHTEEDCTEELFDLHAR.D          | 14           | UCRH_HUMAN           |
| P07919                                                                                                        | 1             | 2.2573           | R.EQCEQLEK.C                   | 3            | UCRH_HUMAN           |
| P07919                                                                                                        | 1             | 2.2005           | R.LELCDER.V                    | 1            | UCRH_HUMAN           |
| <b><i>Ubiquinol-cytochrome c reductase complex 14 kDa protein - Homo sapiens (Human)</i></b>                  |               |                  |                                |              |                      |
| P14927                                                                                                        | 2             | 3.5094           | K.WYYNAAGFNK.L                 | 3            | UCR6_HUMAN           |
| P14927                                                                                                        | 3             | 6.3945           | K.LGLMRDDTIYEDEDVKEAIR.R       | 2            | UCR6_HUMAN           |
| P14927                                                                                                        | 3             | 4.5917           | K.LGLM#RDDTIYEDEDVKEAIR.R      | 1            | UCR6_HUMAN           |
| <b><i>Ubiquinol-cytochrome-c reductase complex core protein 2, mitochondrial precursor - Homo sapiens</i></b> |               |                  |                                |              |                      |
| P22695                                                                                                        | 2             | 2.8217           | K.KFVSGQKSM#AASGNLGHTEPFVDEL.- | 1            | UQCR2_HUMAN          |
| P22695                                                                                                        | 2             | 3.5424           | K.SM#AASGNLGHTEPFVDEL.-        | 2            | UQCR2_HUMAN          |

| <i>Accession No*</i>                                                                  | <i>Charge</i> | <i>XC(Max)**</i> | <i>Peptide*</i>                 | <i>TC***</i> | <i>Reference No*</i> |
|---------------------------------------------------------------------------------------|---------------|------------------|---------------------------------|--------------|----------------------|
| <b><i>Ubiquitin carboxyl-terminal hydrolase 14 - Homo sapiens (Human)</i></b>         |               |                  |                                 |              |                      |
| P54578                                                                                | 2             | 3.5293           | K.AQLFALTGVQPAR.Q               | 1            | UBP14_HUMAN          |
| <b><i>Ubiquitin carboxyl-terminal hydrolase 31 - Homo sapiens (Human)</i></b>         |               |                  |                                 |              |                      |
| Q70CQ4                                                                                | 2             | 3.4311           | K.SQDSVSSPSPQK.Q                | 2            | UBP31_HUMAN          |
| <b><i>Ubiquitin carboxyl-terminal hydrolase 8 - Homo sapiens (Human)</i></b>          |               |                  |                                 |              |                      |
| P40818                                                                                | 3             | 4.5816           | K.KKQEAENEITEK.Q                | 1            | UBP8_HUMAN           |
| <b><i>Ubiquitin carboxyl-terminal hydrolase isozyme L1 - Homo sapiens (Human)</i></b> |               |                  |                                 |              |                      |
| P09936                                                                                | 3             | 4.4797           | -.MQLKPMIEINPEMLNK.V            | 3            | UCHL1_HUMAN          |
| <b><i>Ubiquitin domain-containing protein UBFD1 - Homo sapiens (Human)</i></b>        |               |                  |                                 |              |                      |
| O14562                                                                                | 2             | 4.2404           | K.IM#VVGSTINDVLAVENTPK.D        | 3            | UBFD1_HUMAN          |
| O14562                                                                                | 3             | 5.3941           | R.GSLQPAPAQPPGDPAQASVSNGEDAGGGA | 2            | UBFD1_HUMAN          |
| O14562                                                                                | 3             | 3.9023           | K.HDVKFPLDSTGSELK.Q             | 1            | UBFD1_HUMAN          |
| O14562                                                                                | 2             | 3.0981           | R.LPTVPLSGMYNK.S                | 1            | UBFD1_HUMAN          |
| <b><i>Ubiquitin fusion degradation protein 1 homolog - Homo sapiens (Human)</i></b>   |               |                  |                                 |              |                      |
| Q92890                                                                                | 2             | 3.2975           | K.KVEEDEAGGR.F                  | 2            | UFD1_HUMAN           |
| Q92890                                                                                | 2             | 4.4093           | R.FVAFSGEGQSLR.K                | 5            | UFD1_HUMAN           |
| <b><i>Ubiquitin interaction motif-containing protein 1 - Homo sapiens (Human)</i></b> |               |                  |                                 |              |                      |
| Q96RL1                                                                                | 3             | 5.4517           | R.SRPLATGPSSQSHQEK.T            | 2            | UIMC1_HUMAN          |
| <b><i>Ubiquitin-associated protein 1 - Homo sapiens (Human)</i></b>                   |               |                  |                                 |              |                      |
| Q9NZ09                                                                                | 2             | 5.1113           | R.GGSGSVLQDEEVLASLER.A          | 2            | UBAP1_HUMAN          |
| Q9NZ09                                                                                | 3             | 3.9587           | R.NILVGTTGPIMAQLLDNLP.R.G       | 2            | UBAP1_HUMAN          |
| <b><i>Ubiquitin-associated protein 2-like - Homo sapiens (Human)</i></b>              |               |                  |                                 |              |                      |
| Q14157                                                                                | 1             | 2.4376           | K.DLTQAK.N                      | 5            | UBP2L_HUMAN          |
| Q14157                                                                                | 3             | 4.8978           | R.RYPSSISSPQKDLTQAK.N           | 1            | UBP2L_HUMAN          |
| Q14157                                                                                | 2             | 4.0474           | R.RYPSSISSPQK.D                 | 4            | UBP2L_HUMAN          |
| Q14157                                                                                | 3             | 4.402            | K.STSAPQMSPGSSDNQSSSPQPAQQK.L   | 6            | UBP2L_HUMAN          |
| Q14157                                                                                | 2             | 4.0326           | K.GGSTTGSQFLEQFK.T              | 4            | UBP2L_HUMAN          |
| <b><i>Ubiquitin-conjugating enzyme E2 L3 - Homo sapiens (Human)</i></b>               |               |                  |                                 |              |                      |
| P68036                                                                                | 1             | 2.5926           | K.NAEFTK.K                      | 1            | UB2L3_HUMAN          |
| P68036                                                                                | 2             | 2.8682           | K.NAEFTK.Y                      | 2            | UB2L3_HUMAN          |
| <b><i>Ubiquitin-conjugating enzyme E2 Q1 - Homo sapiens (Human)</i></b>               |               |                  |                                 |              |                      |
| Q7Z7E8                                                                                | 1             | 2.3348           | K.ENLAILEKIK.K                  | 1            | UB2Q1_HUMAN          |
| <b><i>UBX domain-containing protein 1 - Homo sapiens (Human)</i></b>                  |               |                  |                                 |              |                      |
| Q9BZV1                                                                                | 2             | 3.6375           | R.QGPTNEAQMAAAAALAR.L           | 3            | UBXD1_HUMAN          |
| <b><i>UBX domain-containing protein 2 - Homo sapiens (Human)</i></b>                  |               |                  |                                 |              |                      |

| <i>Accession No*</i>                                                                          | <i>Charge</i> | <i>XC(Max)**</i> | <i>Peptide*</i>            | <i>TC***</i> | <i>Reference No*</i> |
|-----------------------------------------------------------------------------------------------|---------------|------------------|----------------------------|--------------|----------------------|
| Q92575                                                                                        | 2             | 2.9723           | K.TKEEVEAAK.A              | 1            | UBXD2_HUMAN          |
| <b><i>UBX domain-containing protein 7 - Homo sapiens (Human)</i></b>                          |               |                  |                            |              |                      |
| O94888                                                                                        | 2             | 3.7063           | R.FELLTNFPR.R              | 2            | UBXD7_HUMAN          |
| <b><i>UDP-glucose:glycoprotein glucosyltransferase 1 precursor - Homo sapiens (Human)</i></b> |               |                  |                            |              |                      |
| Q9NYU2                                                                                        | 2             | 4.2041           | R.ILASPVELALVVMK.D         | 2            | UGGG1_HUMAN          |
| Q9NYU2                                                                                        | 3             | 3.724            | R.VEEDVASDLVMKVDALLSAQPK.G | 1            | UGGG1_HUMAN          |
| <b><i>UHRF1-binding protein 1 - Homo sapiens (Human)</i></b>                                  |               |                  |                            |              |                      |
| Q6BDS2                                                                                        | 2             | 3.7614           | K.TDEGVAAPVSGGAAR.L        | 2            | URFB1_HUMAN          |
| <b><i>UMP-CMP kinase - Homo sapiens (Human)</i></b>                                           |               |                  |                            |              |                      |
| P30085                                                                                        | 3             | 3.7752           | -.MKPLVVVFLGGPGAGK.G       | 1            | KCY_HUMAN            |
| P30085                                                                                        | 3             | 5.2408           | K.RIQTYLQSTKPIIDLYEEMGK.V  | 2            | KCY_HUMAN            |
| P30085                                                                                        | 2             | 2.8813           | K.SVDEVFDEVVQIFDKEG.-      | 2            | KCY_HUMAN            |
| P30085                                                                                        | 3             | 5.11             | R.IQTYLQSTKPIIDLYEEM#GK.V  | 2            | KCY_HUMAN            |
| P30085                                                                                        | 3             | 5.1391           | R.IQTYLQSTKPIIDLYEEMGK.V   | 1            | KCY_HUMAN            |
| P30085                                                                                        | 2             | 2.7968           | R.SDDNRESLEK.R             | 2            | KCY_HUMAN            |
| <b><i>Uncharacterized potential DNA-binding protein C17orf49 - Homo sapiens (Human)</i></b>   |               |                  |                            |              |                      |
| Q8IXM2                                                                                        | 2             | 4.4587           | K.VYEDSGIPLPAESPK.K        | 2            | CQ049_HUMAN          |
| Q8IXM2                                                                                        | 2             | 2.9728           | K.VGEIFSAAGAAFTK.L         | 1            | CQ049_HUMAN          |
| <b><i>Uncharacterized protein C10orf118 - Homo sapiens (Human)</i></b>                        |               |                  |                            |              |                      |
| Q7Z3E2                                                                                        | 2             | 2.7579           | K.QLESRIEELNK.E            | 1            | CJ118_HUMAN          |
| <b><i>Uncharacterized protein C10orf32 - Homo sapiens (Human)</i></b>                         |               |                  |                            |              |                      |
| Q96B45                                                                                        | 3             | 4.5739           | K.MAIITTHLQYQQEAIQK.N      | 2            | CJ032_HUMAN          |
| Q96B45                                                                                        | 2             | 3.6581           | R.SSELLGQAAR.N             | 1            | CJ032_HUMAN          |
| <b><i>Uncharacterized protein C11orf52 - Homo sapiens (Human)</i></b>                         |               |                  |                            |              |                      |
| Q96A22                                                                                        | 2             | 3.3749           | K.HVHLENATEYATLR.F         | 1            | CK052_HUMAN          |
| Q96A22                                                                                        | 2             | 4.1645           | R.VLQQQGSQER.S             | 4            | CK052_HUMAN          |
| <b><i>Uncharacterized protein C12orf42 - Homo sapiens (Human)</i></b>                         |               |                  |                            |              |                      |
| Q96LP6                                                                                        | 2             | 2.809            | -.M#STVIC*M#KQRDEEFLLTIR.P | 1            | CL042_HUMAN          |
| <b><i>Uncharacterized protein C12orf43 - Homo sapiens (Human)</i></b>                         |               |                  |                            |              |                      |
| Q96C57                                                                                        | 3             | 3.8998           | K.VALEDGDFRLFFTSVPGGR.E    | 1            | CL043_HUMAN          |
| Q96C57                                                                                        | 2             | 4.1813           | R.AGAANSQLSTSQPSLR.H       | 3            | CL043_HUMAN          |
| <b><i>Uncharacterized protein C12orf45 - Homo sapiens (Human)</i></b>                         |               |                  |                            |              |                      |
| Q8N5I9                                                                                        | 2             | 4.3223           | R.SPILLDQVQTFLPQMAR.A      | 1            | CL045_HUMAN          |
| <b><i>Uncharacterized protein C14orf173 - Homo sapiens (Human)</i></b>                        |               |                  |                            |              |                      |
| Q27J81                                                                                        | 2             | 3.4772           | R.SQEEVPPDSDDNKTK.K        | 1            | Q27J81_HUMAN         |

| <i>Accession No*</i>                                                   | <i>Charge</i> | <i>XC(Max)**</i> | <i>Peptide*</i>         | <i>TC***</i> | <i>Reference No*</i> |
|------------------------------------------------------------------------|---------------|------------------|-------------------------|--------------|----------------------|
| <b><i>Uncharacterized protein C14orf179 - Homo sapiens (Human)</i></b> |               |                  |                         |              |                      |
| Q96FT9                                                                 | 2             | 4.0413           | K.NSSLTLTGETSSAK.L      | 1            | CN179_HUMAN          |
| <b><i>Uncharacterized protein C14orf43 - Homo sapiens (Human)</i></b>  |               |                  |                         |              |                      |
| Q6PJG2                                                                 | 2             | 3.7676           | R.TSAAMLSQQVASVK.W      | 2            | CN043_HUMAN          |
| <b><i>Uncharacterized protein C15orf38 - Homo sapiens (Human)</i></b>  |               |                  |                         |              |                      |
| Q7Z6K5                                                                 | 2             | 3.7944           | K.TGASWTDNIMAQK.C       | 7            | CO038_HUMAN          |
| Q7Z6K5                                                                 | 2             | 4.1717           | K.TRGDGPFLDSLAK.L       | 2            | CO038_HUMAN          |
| Q7Z6K5                                                                 | 3             | 3.813            | R.GDGPFLDSLAKLEAGTVTK.C | 1            | CO038_HUMAN          |
| Q7Z6K5                                                                 | 3             | 3.7693           | R.KVNTGFLM#SSYKVEAK.G   | 1            | CO038_HUMAN          |
| Q7Z6K5                                                                 | 2             | 4.41             | R.KVNTGFLMSSYK.V        | 1            | CO038_HUMAN          |
| Q7Z6K5                                                                 | 3             | 4.3203           | R.KVNTGFLMSSYKVEAK.G    | 1            | CO038_HUMAN          |
| <b><i>Uncharacterized protein C17orf37 - Homo sapiens (Human)</i></b>  |               |                  |                         |              |                      |
| Q9BRT3                                                                 | 2             | 3.024            | R.ASNGETLEK.I           | 1            | CQ037_HUMAN          |
| Q9BRT3                                                                 | 2             | 2.7094           | R.RASNGETLEK.I          | 1            | CQ037_HUMAN          |
| <b><i>Uncharacterized protein C17orf59 - Homo sapiens (Human)</i></b>  |               |                  |                         |              |                      |
| Q96GS4                                                                 | 2             | 3.3346           | R.ATISSPLELEGTVSR.H     | 1            | CQ059_HUMAN          |
| <b><i>Uncharacterized protein C18orf25 - Homo sapiens (Human)</i></b>  |               |                  |                         |              |                      |
| Q96B23                                                                 | 2             | 3.9186           | K.HGSGTQYVSTR.Q         | 4            | CR025_HUMAN          |
| Q96B23                                                                 | 2             | 3.8642           | R.DSSESQLASTESDKPTTGR.V | 2            | CR025_HUMAN          |
| Q96B23                                                                 | 2             | 3.0686           | R.GGVIQSVSSWK.H         | 2            | CR025_HUMAN          |
| Q96B23                                                                 | 2             | 2.8087           | R.SESETSTMAAK.K         | 1            | CR025_HUMAN          |
| <b><i>Uncharacterized protein C18orf34 - Homo sapiens (Human)</i></b>  |               |                  |                         |              |                      |
| Q5BJE1                                                                 | 2             | 2.7279           | K.LTEDNKKLEIDINK.I      | 1            | CR034_HUMAN          |
| <b><i>Uncharacterized protein C19orf43 - Homo sapiens (Human)</i></b>  |               |                  |                         |              |                      |
| Q9BQ61                                                                 | 2             | 3.2405           | K.TEDEVLTSK.G           | 1            | CS043_HUMAN          |
| Q9BQ61                                                                 | 2             | 4.9901           | R.KGGPGSTLSFVGK.R       | 4            | CS043_HUMAN          |
| Q9BQ61                                                                 | 2             | 4.3892           | K.TEDEVLTSKGDAWAK.Y     | 4            | CS043_HUMAN          |
| Q9BQ61                                                                 | 2             | 4.2827           | K.KQKTEDEVLTSK.G        | 2            | CS043_HUMAN          |
| Q9BQ61                                                                 | 2             | 2.8703           | K.GGPGSTLSFVGK.R        | 2            | CS043_HUMAN          |
| Q9BQ61                                                                 | 2             | 2.9131           | K.GGPGSTLSFVGK.R        | 1            | CS043_HUMAN          |
| Q9BQ61                                                                 | 2             | 2.7546           | R.EAPGPAGGGGGSR.W       | 1            | CS043_HUMAN          |
| <b><i>Uncharacterized protein C19orf44 - Homo sapiens (Human)</i></b>  |               |                  |                         |              |                      |
| Q9H6X5                                                                 | 2             | 2.7931           | K.QAPVENISPEAPAGKER.T   | 1            | CS044_HUMAN          |
| <b><i>Uncharacterized protein C19orf58 - Homo sapiens (Human)</i></b>  |               |                  |                         |              |                      |
| Q9BW61                                                                 | 2             | 4.2548           | R.DQEQVELEGESSAPPR.K    | 2            | Q9BW61_HUMA          |

| <i>Accession No*</i>                                                  | <i>Charge</i> | <i>XC(Max)**</i> | <i>Peptide*</i>              | <i>TC***</i> | <i>Reference No*</i> |
|-----------------------------------------------------------------------|---------------|------------------|------------------------------|--------------|----------------------|
| Q9BW61                                                                | 2             | 3.3125           | R.TDSPDMHEDT.-               | 1            | Q9BW61_HUMA          |
| <b><i>Uncharacterized protein C19orf61 - Homo sapiens (Human)</i></b> |               |                  |                              |              |                      |
| Q9H0W8                                                                | 2             | 3.059            | R.DASEETSTSV#QK.T            | 1            | CS061_HUMAN          |
| Q9H0W8                                                                | 2             | 3.4151           | R.DASEETSTSV#QK.T            | 4            | CS061_HUMAN          |
| <b><i>Uncharacterized protein C19orf62 - Homo sapiens (Human)</i></b> |               |                  |                              |              |                      |
| Q9NWW8                                                                | 3             | 4.0922           | R.SEGEGEASADDGSLNTSGAGPK.S   | 1            | CS062_HUMAN          |
| Q9NWW8                                                                | 2             | 3.4264           | R.AVGAQASVGS.R               | 2            | CS062_HUMAN          |
| <b><i>Uncharacterized protein Clorf174 - Homo sapiens (Human)</i></b> |               |                  |                              |              |                      |
| Q8IYL3                                                                | 2             | 2.898            | R.AKDDDDDDDDAEM.-            | 1            | CA174_HUMAN          |
| Q8IYL3                                                                | 2             | 5.8666           | K.HSAGSGAEESNSSSTVQK.Q       | 3            | CA174_HUMAN          |
| Q8IYL3                                                                | 2             | 3.4672           | R.AKDDDDDDDDAEM#.-           | 3            | CA174_HUMAN          |
| <b><i>Uncharacterized protein Clorf198 - Homo sapiens (Human)</i></b> |               |                  |                              |              |                      |
| Q9H425                                                                | 2             | 2.8138           | R.QEQRPLPNVSTER.E            | 1            | CA198_HUMAN          |
| Q9H425                                                                | 3             | 4.5378           | R.SRGEPEAEFQSLTPSQIK.S       | 2            | CA198_HUMAN          |
| Q9H425                                                                | 2             | 3.9479           | R.LPPAQQDEIIDR.C             | 3            | CA198_HUMAN          |
| Q9H425                                                                | 3             | 4.2669           | R.FGDEDLTWQDEHSAPFSWETK.S    | 1            | CA198_HUMAN          |
| Q9H425                                                                | 3             | 5.0807           | R.ERPQPVQAFSSALHEAAPSQLEGK.L | 1            | CA198_HUMAN          |
| Q9H425                                                                | 2             | 3.6513           | R.DPGDSEELTR.F               | 4            | CA198_HUMAN          |
| Q9H425                                                                | 2             | 2.7806           | K.TGFDFLDNW.-                | 1            | CA198_HUMAN          |
| Q9H425                                                                | 3             | 3.847            | K.LPSPDVQRDDGEDTLFSEPK.F     | 1            | CA198_HUMAN          |
| Q9H425                                                                | 2             | 4.2895           | K.FAQVSSSNVVLK.T             | 4            | CA198_HUMAN          |
| <b><i>Uncharacterized protein Clorf31 - Homo sapiens (Human)</i></b>  |               |                  |                              |              |                      |
| Q5JTJ3                                                                | 2             | 3.4635           | K.EKFEAGQFEPSETTAKS.-        | 2            | CA031_HUMAN          |
| Q5JTJ3                                                                | 2             | 4.8937           | K.FEAGQFEPSETTAK.S           | 5            | CA031_HUMAN          |
| Q5JTJ3                                                                | 2             | 3.6708           | K.FEAGQFEPSETTAKS.-          | 4            | CA031_HUMAN          |
| Q5JTJ3                                                                | 3             | 4.7809           | K.FKEKFEAGQFEPSETTAK.S       | 1            | CA031_HUMAN          |
| Q5JTJ3                                                                | 2             | 3.7451           | R.SSFESSCPQQWIK.Y            | 3            | CA031_HUMAN          |
| Q5JTJ3                                                                | 2             | 4.8047           | K.EKFEAGQFEPSETTAK.S         | 2            | CA031_HUMAN          |
| <b><i>Uncharacterized protein Clorf50 - Homo sapiens (Human)</i></b>  |               |                  |                              |              |                      |
| Q9BV19                                                                | 3             | 5.2839           | R.AGDPLDLVALAEQVQK.A         | 1            | CA050_HUMAN          |
| Q9BV19                                                                | 2             | 3.6              | R.ESGQQYFSIISPKE             | 3            | CA050_HUMAN          |
| <b><i>Uncharacterized protein Clorf55 - Homo sapiens (Human)</i></b>  |               |                  |                              |              |                      |
| Q6IQ49                                                                | 2             | 4.2027           | R.VAEVAPEERENAVAK.L          | 2            | CA055_HUMAN          |
| Q6IQ49                                                                | 2             | 3.5866           | R.MVTETEETQEK.K              | 4            | CA055_HUMAN          |
| Q6IQ49                                                                | 2             | 3.2283           | R.M#VTETEETQEK.K             | 1            | CA055_HUMAN          |



| <i>Accession No*</i>                                                             | <i>Charge</i> | <i>XC(Max)**</i> | <i>Peptide*</i>                  | <i>TC***</i> | <i>Reference No*</i> |
|----------------------------------------------------------------------------------|---------------|------------------|----------------------------------|--------------|----------------------|
| Q6IQ49                                                                           | 3             | 4.639            | R.VVNTDHGSPEQLQIPVTDGR.H         | 2            | CA055_HUMAN          |
| <b><i>Uncharacterized protein C1orf71 - Homo sapiens (Human)</i></b>             |               |                  |                                  |              |                      |
| Q6PJW8                                                                           | 2             | 3.4652           | K.LVLQSLFSLIR.G                  | 2            | CA071_HUMAN          |
| <b><i>Uncharacterized protein C1orf96 - Homo sapiens (Human)</i></b>             |               |                  |                                  |              |                      |
| Q6IQ19                                                                           | 2             | 2.7521           | R.C*APPSPPPPVEPATQEEAERR.A       | 1            | CA096_HUMAN          |
| <b><i>Uncharacterized protein C20orf116 precursor - Homo sapiens (Human)</i></b> |               |                  |                                  |              |                      |
| Q96HY6                                                                           | 4             | 5.7994           | R.TQDTINRIQDLLAEGTITGVDDRGRK.F   | 1            | CT116_HUMAN          |
| <b><i>Uncharacterized protein C20orf43 - Homo sapiens (Human)</i></b>            |               |                  |                                  |              |                      |
| Q9BY42                                                                           | 2             | 4.3819           | R.SIADSESEAYK.S                  | 1            | CT043_HUMAN          |
| <b><i>Uncharacterized protein C21orf25 precursor - Homo sapiens (Human)</i></b>  |               |                  |                                  |              |                      |
| Q9Y426                                                                           | 3             | 4.1388           | K.DPGMSQSHNDLVFLEQPEGSR.R        | 1            | CU025_HUMAN          |
| <b><i>Uncharacterized protein C2orf33 - Homo sapiens (Human)</i></b>             |               |                  |                                  |              |                      |
| Q9GZY8                                                                           | 3             | 4.4044           | K.VAPPNADLEQGFQEGVNPASVIMQVPER.I | 1            | CB033_HUMAN          |
| <b><i>Uncharacterized protein C2orf55 - Homo sapiens (Human)</i></b>             |               |                  |                                  |              |                      |
| Q6NV74                                                                           | 2             | 2.7211           | R.EAAEGLGEDSTGK.K                | 1            | CB055_HUMAN          |
| <b><i>Uncharacterized protein C3orf19 - Homo sapiens (Human)</i></b>             |               |                  |                                  |              |                      |
| Q6PII3                                                                           | 2             | 2.73             | R.QLGVGYFAFAR.D                  | 1            | CC019_HUMAN          |
| <b><i>Uncharacterized protein C4orf8 - Homo sapiens (Human)</i></b>              |               |                  |                                  |              |                      |
| P78312                                                                           | 3             | 4.9621           | R.RVEDLLQFINSETKPVSTR.A          | 2            | CD008_HUMAN          |
| <b><i>Uncharacterized protein C6orf203 - Homo sapiens (Human)</i></b>            |               |                  |                                  |              |                      |
| Q9P0P8                                                                           | 3             | 5.3288           | K.VGDTLDLLIGEDKEAGTETVM#R.I      | 1            | CF203_HUMAN          |
| Q9P0P8                                                                           | 3             | 5.6429           | K.VGDTLDLLIGEDKEAGTETVMR.I       | 2            | CF203_HUMAN          |
| <b><i>Uncharacterized protein C7orf28 - Homo sapiens (Human)</i></b>             |               |                  |                                  |              |                      |
| O95766                                                                           | 2             | 3.0046           | K.AMEDGGVKKLLKER.L               | 1            | CG028_HUMAN          |
| <b><i>Uncharacterized protein C8orf42 - Homo sapiens (Human)</i></b>             |               |                  |                                  |              |                      |
| Q86YL5                                                                           | 2             | 3.0364           | K.GHLTDSPEEAE.-                  | 2            | Q86YL5_HUMAN         |
| Q86YL5                                                                           | 2             | 3.52             | K.KSGFWDNLVLK.Q                  | 2            | Q86YL5_HUMAN         |
| Q86YL5                                                                           | 2             | 2.7987           | K.SGFWDNLVLK.Q                   | 1            | Q86YL5_HUMAN         |
| Q86YL5                                                                           | 2             | 3.2668           | K.YTSLASSANSSR.W                 | 1            | Q86YL5_HUMAN         |
| Q86YL5                                                                           | 3             | 5.6948           | R.VLLDEPPEEEDGLRGGPPPAQAAQAVQ    | 2            | Q86YL5_HUMAN         |
| <b><i>Uncharacterized protein C8orf45 - Homo sapiens (Human)</i></b>             |               |                  |                                  |              |                      |
| Q4G0Z9                                                                           | 2             | 2.8605           | R.FYM#MQGIVIAM#TTITK.Y           | 1            | CH045_HUMAN          |
| <b><i>Uncharacterized protein C8orf47 - Homo sapiens (Human)</i></b>             |               |                  |                                  |              |                      |
| Q6P6B1                                                                           | 3             | 6.92             | K.DAGAGTEAESLKGNAEAQPLGPEAK.G    | 4            | CH047_HUMAN          |

| <i>Accession No*</i>                                                  | <i>Charge</i> | <i>XC(Max)**</i> | <i>Peptide*</i>              | <i>TC***</i> | <i>Reference No*</i> |
|-----------------------------------------------------------------------|---------------|------------------|------------------------------|--------------|----------------------|
| Q6P6B1                                                                | 2             | 2.8794           | R.NVEAGAYVEMIR.N             | 1            | CH047_HUMAN          |
| Q6P6B1                                                                | 2             | 2.9491           | R.ESTVDGNVQR.E               | 1            | CH047_HUMAN          |
| Q6P6B1                                                                | 3             | 6.1315           | K.TPEGPGNMEIQPEGIVGSMEHPAR.N | 2            | CH047_HUMAN          |
| <b><i>Uncharacterized protein C9orf142 - Homo sapiens (Human)</i></b> |               |                  |                              |              |                      |
| Q9BUH6                                                                | 2             | 3.608            | K.SKKPAGGVDFDET.-            | 1            | CI142_HUMAN          |
| Q9BUH6                                                                | 2             | 3.508            | R.FGLSAAEDITPR.F             | 2            | CI142_HUMAN          |
| <b><i>Uncharacterized protein C9orf40 - Homo sapiens (Human)</i></b>  |               |                  |                              |              |                      |
| Q8IXQ3                                                                | 2             | 3.794            | R.LPGGGGDDGAGR.A             | 13           | CI040_HUMAN          |
| <b><i>Uncharacterized protein C9orf78 - Homo sapiens (Human)</i></b>  |               |                  |                              |              |                      |
| Q9NZ63                                                                | 2             | 3.4762           | R.GDSESEEDEQDSEEV.R.L        | 1            | CI078_HUMAN          |
| <b><i>Uncharacterized protein C9orf80 - Homo sapiens (Human)</i></b>  |               |                  |                              |              |                      |
| Q9NRY2                                                                | 2             | 3.8104           | R.VAILAELDKEK.R              | 1            | CI080_HUMAN          |
| <b><i>Uncharacterized protein C9orf82 - Homo sapiens (Human)</i></b>  |               |                  |                              |              |                      |
| Q9H8G2                                                                | 2             | 3.5266           | K.SVNEILGLAESSPNEPK.A        | 1            | CI082_HUMAN          |
| Q9H8G2                                                                | 2             | 4.3491           | R.STDSSSVSGSLQQETK.Y         | 1            | CI082_HUMAN          |
| <b><i>Uncharacterized protein KIAA0157 - Homo sapiens (Human)</i></b> |               |                  |                              |              |                      |
| Q15018                                                                | 2             | 3.3689           | R.M#PSSGFAAEGR.S             | 1            | K0157_HUMAN          |
| <b><i>Uncharacterized protein KIAA0256 - Homo sapiens (Human)</i></b> |               |                  |                              |              |                      |
| Q93073                                                                | 3             | 4.6284           | K.NKTPVQLDLGDMMLAALEK.Q      | 1            | K0256_HUMAN          |
| Q93073                                                                | 2             | 3.2049           | K.SLSETTATMLWK.S             | 2            | K0256_HUMAN          |
| <b><i>Uncharacterized protein KIAA0460 - Homo sapiens (Human)</i></b> |               |                  |                              |              |                      |
| Q5VT52                                                                | 2             | 3.5159           | R.APQFQESVGSFR.S             | 3            | K0460_HUMAN          |
| Q5VT52                                                                | 3             | 4.2307           | R.DAPTHLPSVDLSNPFTK.E        | 1            | K0460_HUMAN          |
| Q5VT52                                                                | 2             | 3.8414           | R.LSSSPGLFGAFSVR.G           | 2            | K0460_HUMAN          |
| <b><i>Uncharacterized protein KIAA0515 - Homo sapiens (Human)</i></b> |               |                  |                              |              |                      |
| Q5JSZ5                                                                | 2             | 3.2247           | K.LQEAPSAASQM#K.R            | 2            | K0515_HUMAN          |
| Q5JSZ5                                                                | 2             | 3.737            | K.SSQGDSGVDLAESR.E           | 1            | K0515_HUMAN          |
| Q5JSZ5                                                                | 2             | 2.8174           | R.AGEQGEAMK.Q                | 1            | K0515_HUMAN          |
| Q5JSZ5                                                                | 2             | 3.6136           | R.AIGLSPMSFPTADLTLK.M        | 2            | K0515_HUMAN          |
| Q5JSZ5                                                                | 2             | 3.5517           | R.LLSFSPEEFPTLK.A            | 4            | K0515_HUMAN          |
| <b><i>Uncharacterized protein KIAA0802 - Homo sapiens (Human)</i></b> |               |                  |                              |              |                      |
| Q9Y4B5                                                                | 2             | 2.8181           | K.AGGGATPVSSPSR.S            | 1            | K0802_HUMAN          |
| Q9Y4B5                                                                | 2             | 2.7938           | K.APPSPGSLAAPGR.L            | 2            | K0802_HUMAN          |
| <b><i>Uncharacterized protein KIAA0819 - Homo sapiens (Human)</i></b> |               |                  |                              |              |                      |
| O94909                                                                | 2             | 3.0161           | R.TYTEEELNAK.L               | 2            | K0819_HUMAN          |

| <i>Accession No*</i>                                                  | <i>Charge</i> | <i>XC(Max)**</i> | <i>Peptide*</i>                    | <i>TC***</i> | <i>Reference No*</i> |
|-----------------------------------------------------------------------|---------------|------------------|------------------------------------|--------------|----------------------|
| O94909                                                                | 2             | 3.8483           | K.GKSEEELEASK.S                    | 2            | K0819_HUMAN          |
| O94909                                                                | 2             | 2.7001           | K.LMQEWFK.L                        | 1            | K0819_HUMAN          |
| O94909                                                                | 3             | 3.7895           | K.SPQDEGLHLLKPLSIPK.R              | 1            | K0819_HUMAN          |
| O94909                                                                | 2             | 3.7232           | R.DSLVALLEEQR.L                    | 2            | K0819_HUMAN          |
| O94909                                                                | 3             | 5.0258           | R.EREEDKDLEAAMLSK.G                | 1            | K0819_HUMAN          |
| O94909                                                                | 2             | 2.9071           | R.GPSQATSPIR.S                     | 2            | K0819_HUMAN          |
| O94909                                                                | 2             | 3.5523           | R.SDLVEEFWMK.S                     | 2            | K0819_HUMAN          |
| <b><i>Uncharacterized protein KIAA1143 - Homo sapiens (Human)</i></b> |               |                  |                                    |              |                      |
| Q96AT1                                                                | 2             | 3.7212           | R.NQVSYVRPAEPAFLAR.F               | 1            | K1143_HUMAN          |
| Q96AT1                                                                | 3             | 4.5972           | K.KPNEDEVNQDSVKK.N                 | 2            | K1143_HUMAN          |
| Q96AT1                                                                | 3             | 4.5003           | K.KKPNEDEVNQDSVK.K                 | 1            | K1143_HUMAN          |
| Q96AT1                                                                | 2             | 3.5947           | K.KGDLSVEEVMK.I                    | 2            | K1143_HUMAN          |
| Q96AT1                                                                | 2             | 3.7413           | K.KGDLSVEEVM#K.I                   | 2            | K1143_HUMAN          |
| Q96AT1                                                                | 2             | 4.0066           | K.AAKADEEPTPADGR.I                 | 2            | K1143_HUMAN          |
| Q96AT1                                                                | 2             | 3.3412           | K.ADEEPTPADGR.I                    | 7            | K1143_HUMAN          |
| <b><i>Uncharacterized protein KIAA1543 - Homo sapiens (Human)</i></b> |               |                  |                                    |              |                      |
| Q9P1Y5                                                                | 2             | 3.7642           | R.APAEEEVGPR.K                     | 2            | K1543_HUMAN          |
| Q9P1Y5                                                                | 2             | 3.2797           | K.LSAALSSLQR.D                     | 2            | K1543_HUMAN          |
| Q9P1Y5                                                                | 2             | 3.6486           | K.AVASSPAATNSEVK.M                 | 4            | K1543_HUMAN          |
| Q9P1Y5                                                                | 3             | 4.5781           | K.AEAEAGAGSPTSTPAPPEALSSEMSELSAR.L | 1            | K1543_HUMAN          |
| Q9P1Y5                                                                | 3             | 4.1209           | R.LAQEEAPGPAPLVSAPVPM#ATPAPAAR.A   | 1            | K1543_HUMAN          |
| <b><i>Uncharacterized protein KIAA1671 - Homo sapiens (Human)</i></b> |               |                  |                                    |              |                      |
| Q9BY89                                                                | 2             | 3.0407           | R.EGDGPAQVPQPAVR.M                 | 1            | K1671_HUMAN          |
| Q9BY89                                                                | 2             | 4.0054           | R.VETQEVNPGASR.D                   | 2            | K1671_HUMAN          |
| Q9BY89                                                                | 2             | 2.7512           | R.VADGEEAAGGEWASR.R                | 1            | K1671_HUMAN          |
| Q9BY89                                                                | 2             | 4.021            | R.SPLEDETNTWMFK.D                  | 1            | K1671_HUMAN          |
| Q9BY89                                                                | 3             | 3.8616           | R.SAPLSQDTKPPVQEEAGQDHPPSK.A       | 2            | K1671_HUMAN          |
| Q9BY89                                                                | 2             | 2.7682           | R.RSGPFVDQLK.Q                     | 1            | K1671_HUMAN          |
| Q9BY89                                                                | 2             | 3.4061           | R.MPAFPGMDPAVLK.A                  | 1            | K1671_HUMAN          |
| Q9BY89                                                                | 2             | 3.3656           | R.DLEKEDAPQEK.E                    | 2            | K1671_HUMAN          |
| Q9BY89                                                                | 3             | 3.8152           | K.SPVPSLRPSSTGSPSPGGLSEEPAAK.D     | 1            | K1671_HUMAN          |
| Q9BY89                                                                | 2             | 2.8386           | K.SPFQPGVLGSR.V                    | 2            | K1671_HUMAN          |
| Q9BY89                                                                | 2             | 3.4526           | K.MSPSGGAPQTTPTLR.S                | 2            | K1671_HUMAN          |
| Q9BY89                                                                | 3             | 4.4372           | K.ERPLQQVSPVASVPWR.S               | 2            | K1671_HUMAN          |
| Q9BY89                                                                | 3             | 5.7429           | K.DLDNRMPGLVGQEVGSGEGPR.T          | 2            | K1671_HUMAN          |

| <i>Accession No*</i>                                                           | <i>Charge</i> | <i>XC(Max)**</i> | <i>Peptide*</i>                | <i>TC***</i> | <i>Reference No*</i> |
|--------------------------------------------------------------------------------|---------------|------------------|--------------------------------|--------------|----------------------|
| Q9BY89                                                                         | 2             | 3.6961           | R.MPGLVGQEVGSGEGPR.T           | 2            | K1671_HUMAN          |
| <b><i>Uncharacterized protein KIAA1704 - Homo sapiens (Human)</i></b>          |               |                  |                                |              |                      |
| Q8IXQ4                                                                         | 2             | 4.2209           | R.LAEQVSSYNESK.R               | 3            | K1704_HUMAN          |
| Q8IXQ4                                                                         | 2             | 4.0383           | R.LAEQVSSYNESKR.S              | 2            | K1704_HUMAN          |
| Q8IXQ4                                                                         | 3             | 5.5688           | K.RLAEQVSSYNESKR.S             | 2            | K1704_HUMAN          |
| Q8IXQ4                                                                         | 2             | 3.5306           | R.DLIGPALPPGFK.A               | 2            | K1704_HUMAN          |
| Q8IXQ4                                                                         | 2             | 3.374            | K.KDEEHILSGR.D                 | 2            | K1704_HUMAN          |
| Q8IXQ4                                                                         | 3             | 4.0093           | K.GPVNYNVTFEFKR.A              | 2            | K1704_HUMAN          |
| Q8IXQ4                                                                         | 2             | 4.406            | K.GPVNYNVTFEFK.R               | 3            | K1704_HUMAN          |
| Q8IXQ4                                                                         | 2             | 2.8936           | K.GDDDSSKPIVR.E                | 2            | K1704_HUMAN          |
| Q8IXQ4                                                                         | 3             | 3.8574           | K.LTKGDDDSSKPIVR.E             | 1            | K1704_HUMAN          |
| <b><i>Uncharacterized protein KIAA1712 - Homo sapiens (Human)</i></b>          |               |                  |                                |              |                      |
| Q9C0F1                                                                         | 2             | 3.2189           | K.VMVDENTWTNLLSR.V             | 1            | K1712_HUMAN          |
| <b><i>Uncharacterized protein RUNDC2B - Homo sapiens (Human)</i></b>           |               |                  |                                |              |                      |
| Q8IUI4                                                                         | 2             | 3.0736           | K.SIDDEDVDENEDDVYGNSSGR.K      | 2            | RUN2B_HUMAN          |
| <b><i>UPF0235 protein C15orf40 - Homo sapiens (Human)</i></b>                  |               |                  |                                |              |                      |
| Q8WUR7                                                                         | 2             | 3.9897           | K.LLASTTPEEILEK.L              | 8            | CO040_HUMAN          |
| <b><i>UPF0318 protein FAM120A - Homo sapiens (Human)</i></b>                   |               |                  |                                |              |                      |
| Q9NZB2                                                                         | 2             | 4.5377           | K.SQGGVQPIPSQGGK.L             | 2            | F120A_HUMAN          |
| Q9NZB2                                                                         | 2             | 3.8893           | K.AEGSSTASSGSQLAEGK.G          | 2            | F120A_HUMAN          |
| Q9NZB2                                                                         | 2             | 5.9787           | K.NQAAIQGRPPYAASAEVAK.E        | 3            | F120A_HUMAN          |
| <b><i>UPF0361 protein DC12 - Homo sapiens (Human)</i></b>                      |               |                  |                                |              |                      |
| Q96FZ2                                                                         | 2             | 3.0327           | R.GTAGLLEQWLK.R                | 1            | DC12_HUMAN           |
| <b><i>UPF0366 protein C11orf67 - Homo sapiens (Human)</i></b>                  |               |                  |                                |              |                      |
| Q9H7C9                                                                         | 2             | 2.8853           | R.ETGTEHSPGVQPADVK.E           | 1            | CK067_HUMAN          |
| Q9H7C9                                                                         | 3             | 4.1244           | R.ETGTEHSPGVQPADVKEVVEK.G      | 1            | CK067_HUMAN          |
| Q9H7C9                                                                         | 2             | 4.967            | R.VLQTEQAVKEYNALVAQGVR.V       | 3            | CK067_HUMAN          |
| Q9H7C9                                                                         | 2             | 4.0039           | K.EYNALVAQGVR.V                | 3            | CK067_HUMAN          |
| <b><i>UPF0368 protein Cxorf26 - Homo sapiens (Human)</i></b>                   |               |                  |                                |              |                      |
| Q9BVG4                                                                         | 2             | 3.3821           | K.FNGIVEDFNYPVTK.L             | 2            | CX026_HUMAN          |
| <b><i>UPF0369 protein C6orf57 precursor - Homo sapiens (Human)</i></b>         |               |                  |                                |              |                      |
| Q5VUM1                                                                         | 2             | 3.379            | K.TSSSQGGKSELVK.Q              | 2            | CF057_HUMAN          |
| Q5VUM1                                                                         | 3             | 3.8065           | R.FDAPEDSHLEKEPLEKFPDDVNPVTK.E | 1            | CF057_HUMAN          |
| <b><i>UPF0378 family protein KIAA0100 precursor - Homo sapiens (Human)</i></b> |               |                  |                                |              |                      |
| Q14667                                                                         | 2             | 2.9704           | R.QLIATDDAVPLGPGK.G            | 1            | K0100_HUMAN          |

| <i>Accession No*</i>                                                    | <i>Charge</i> | <i>XC(Max)**</i> | <i>Peptide*</i>                | <i>TC***</i> | <i>Reference No*</i> |
|-------------------------------------------------------------------------|---------------|------------------|--------------------------------|--------------|----------------------|
| <b><i>UPF0384 protein CGI-117 - Homo sapiens (Human)</i></b>            |               |                  |                                |              |                      |
| Q9Y3C1                                                                  | 3             | 4.1826           | K.RFYPAEWQDFLDSLQKR.K          | 1            | U384_HUMAN           |
| Q9Y3C1                                                                  | 2             | 3.5522           | R.DEKNYYQDTPK.Q                | 3            | U384_HUMAN           |
| <b><i>UPF0404 protein C11orf59 - Homo sapiens (Human)</i></b>           |               |                  |                                |              |                      |
| Q6IAA8                                                                  | 2             | 4.4291           | R.TDEQALLSSILAK.T              | 2            | CK059_HUMAN          |
| <b><i>UPF0418 protein C8orf70 - Homo sapiens (Human)</i></b>            |               |                  |                                |              |                      |
| Q96GY0                                                                  | 2             | 3.2307           | R.RFNENAADR.H                  | 3            | CH070_HUMAN          |
| <b><i>UPF0428 protein CXorf56 - Homo sapiens (Human)</i></b>            |               |                  |                                |              |                      |
| Q9H5V9                                                                  | 2             | 2.8537           | R.RLQELAELEAK.K                | 1            | CX056_HUMAN          |
| <b><i>UPF0430 protein - Homo sapiens (Human)</i></b>                    |               |                  |                                |              |                      |
| Q9NWB6                                                                  | 3             | 4.8947           | K.IRQQEIEEKLIEETAR.R           | 2            | U430_HUMAN           |
| Q9NWB6                                                                  | 2             | 3.2999           | R.RVEELVAK.R                   | 4            | U430_HUMAN           |
| <b><i>UPF0444 protein C12orf23 - Homo sapiens (Human)</i></b>           |               |                  |                                |              |                      |
| Q8WUH6                                                                  | 2             | 5.1868           | K.GAVGATIGGVAWIGGK.S           | 1            | CL023_HUMAN          |
| Q8WUH6                                                                  | 2             | 6.0266           | K.GGVSAVAGGVTAVGSAVVNK.V       | 5            | CL023_HUMAN          |
| Q8WUH6                                                                  | 2             | 6.1657           | K.GGVSAVAGGVTAVGSAVVNKVPLTGK.K | 1            | CL023_HUMAN          |
| Q8WUH6                                                                  | 2             | 3.6173           | K.TAVTTPSM#GIGLVK.G            | 1            | CL023_HUMAN          |
| Q8WUH6                                                                  | 2             | 3.7755           | K.TAVTTPSMGIGLVK.G             | 2            | CL023_HUMAN          |
| Q8WUH6                                                                  | 2             | 3.3867           | R.VTGGIFSVTK.G                 | 2            | CL023_HUMAN          |
| <b><i>UPF0446 protein C12orf31 - Homo sapiens (Human)</i></b>           |               |                  |                                |              |                      |
| Q9BRT6                                                                  | 3             | 4.3595           | K.TLLDQHGQYPIWM#NQR.Q          | 1            | CL031_HUMAN          |
| <b><i>UPF0448 protein C10orf104 - Homo sapiens (Human)</i></b>          |               |                  |                                |              |                      |
| Q96DE5                                                                  | 2             | 3.3024           | K.LAGLVEELEADEWR.F             | 1            | CJ104_HUMAN          |
| <b><i>UPF0449 protein C19orf25 - Homo sapiens (Human)</i></b>           |               |                  |                                |              |                      |
| Q9UFG5                                                                  | 3             | 4.4557           | R.VLLPTRPAPPTVEQILEDVR.G       | 2            | CS025_HUMAN          |
| Q9UFG5                                                                  | 3             | 4.3358           | R.MMEDAEAPGEQLYQQSR.A          | 4            | CS025_HUMAN          |
| Q9UFG5                                                                  | 2             | 3.155            | R.LQQAGNVL.R.Q                 | 1            | CS025_HUMAN          |
| Q9UFG5                                                                  | 2             | 3.2861           | R.AGEDLEREVAQMK.Q              | 3            | CS025_HUMAN          |
| Q9UFG5                                                                  | 3             | 3.9442           | R.GAPAEDPVFTILAPEDPPVPR.M      | 2            | CS025_HUMAN          |
| <b><i>UPF0451 protein C17orf61 precursor - Homo sapiens (Human)</i></b> |               |                  |                                |              |                      |
| Q8N2U0                                                                  | 1             | 2.7042           | K.ELFDKANK.H                   | 2            | CQ061_HUMAN          |
| <b><i>Upstream stimulatory factor 2 - Homo sapiens (Human)</i></b>      |               |                  |                                |              |                      |
| Q15853                                                                  | 2             | 3.1942           | R.TETNGGQVTYR.V                | 2            | USF2_HUMAN           |
| <b><i>Uromodulin precursor - Homo sapiens (Human)</i></b>               |               |                  |                                |              |                      |
| P07911                                                                  | 2             | 3.1223           | K.TALQPMVSALNIR.V              | 2            | UROM_HUMAN           |

| <i>Accession No*</i>                                                                                | <i>Charge</i> | <i>XC(Max)**</i> | <i>Peptide*</i>                    | <i>TC***</i> | <i>Reference No*</i> |
|-----------------------------------------------------------------------------------------------------|---------------|------------------|------------------------------------|--------------|----------------------|
| P07911                                                                                              | 2             | 4.5408           | R.DSTIQVVENGESSQGR.F               | 5            | UROM_HUMAN           |
| P07911                                                                                              | 1             | 3.193            | R.FVGGQGGAR.M                      | 2            | UROM_HUMAN           |
| <b><i>USP6 N-terminal-like protein - Homo sapiens (Human)</i></b>                                   |               |                  |                                    |              |                      |
| Q92738                                                                                              | 2             | 2.7384           | K.LKDEADFQR.K                      | 1            | US6NL_HUMAN          |
| Q92738                                                                                              | 2             | 3.0198           | R.IEVLPVDTGAGGYSGNSGSPK.N          | 1            | US6NL_HUMAN          |
| <b><i>UV excision repair protein RAD23 homolog A - Homo sapiens (Human)</i></b>                     |               |                  |                                    |              |                      |
| P54725                                                                                              | 3             | 4.128            | K.AGQGTSAPPEASPTAAPESSTSFPPAPTSGM  | 6            | RD23A_HUMAN          |
| P54725                                                                                              | 2             | 3.4457           | K.IRMEPDETVK.V                     | 1            | RD23A_HUMAN          |
| P54725                                                                                              | 2             | 2.8567           | R.ASYNNPHR.A                       | 4            | RD23A_HUMAN          |
| P54725                                                                                              | 3             | 5.011            | R.EDKSPSEESAPTTSPESVSGSVPSSGSSGR.  | 1            | RD23A_HUMAN          |
| P54725                                                                                              | 3             | 8.229            | R.QVIQQNPALLPALLQQLGQENPQLLQQISR.H | 4            | RD23A_HUMAN          |
| P54725                                                                                              | 3             | 4.3269           | K.AGQGTSAPPEASPTAAPESSTSFPPAPTSGM  | 2            | RD23A_HUMAN          |
| <b><i>UV excision repair protein RAD23 homolog B - Homo sapiens (Human)</i></b>                     |               |                  |                                    |              |                      |
| P54727                                                                                              | 2             | 2.8911           | R.AVEYLLMGIPGDR.E                  | 1            | RD23B_HUMAN          |
| P54727                                                                                              | 1             | 3.0716           | R.NQPQFQQMR.Q                      | 4            | RD23B_HUMAN          |
| P54727                                                                                              | 2             | 4.854            | R.QIIQQNPSELLPALLQQIGR.E           | 1            | RD23B_HUMAN          |
| <b><i>UV radiation resistance-associated gene protein - Homo sapiens (Human)</i></b>                |               |                  |                                    |              |                      |
| Q9P2Y5                                                                                              | 2             | 3.6049           | R.IYALNENVSSFR.R                   | 2            | UVRAG_HUMAN          |
| <b><i>Uveal autoantigen with coiled-coil domains and ankyrin repeats - Homo sapiens (Human)</i></b> |               |                  |                                    |              |                      |
| Q9BZF9                                                                                              | 2             | 3.5774           | K.LAQHVKPEEHEQVK.S                 | 1            | UACA_HUMAN           |
| Q9BZF9                                                                                              | 2             | 2.8504           | R.NLENTQNQIK.A                     | 2            | UACA_HUMAN           |
| Q9BZF9                                                                                              | 3             | 4.329            | K.SHDAIIDLNRK.L                    | 2            | UACA_HUMAN           |
| Q9BZF9                                                                                              | 2             | 3.8542           | K.QTSEILAVQNLLQK.Q                 | 1            | UACA_HUMAN           |
| Q9BZF9                                                                                              | 3             | 3.7306           | K.KKFEDINQEFVK.I                   | 1            | UACA_HUMAN           |
| Q9BZF9                                                                                              | 2             | 4.2805           | K.DNKITELLNDVER.L                  | 1            | UACA_HUMAN           |
| Q9BZF9                                                                                              | 2             | 3.5849           | K.SDLETQISSLNEK.L                  | 1            | UACA_HUMAN           |
| <b><i>Vacuolar ATP synthase catalytic subunit A - Homo sapiens (Human)</i></b>                      |               |                  |                                    |              |                      |
| P38606                                                                                              | 3             | 5.5379           | K.IKSDYAQLLEDMQNAFR.S              | 3            | VATA_HUMAN           |
| <b><i>Vacuolar ATP synthase subunit E 1 - Homo sapiens (Human)</i></b>                              |               |                  |                                    |              |                      |
| P36543                                                                                              | 2             | 2.8022           | R.GALFGANANR.K                     | 1            | VATE1_HUMAN          |
| P36543                                                                                              | 2             | 3.5635           | R.LDLIAQQMMPEVR.G                  | 2            | VATE1_HUMAN          |
| <b><i>Vacuolar ATP synthase subunit F - Homo sapiens (Human)</i></b>                                |               |                  |                                    |              |                      |
| Q16864                                                                                              | 3             | 6.5824           | R.HALDAHQQSIPAVLEIPSKEHPYDAAK.D    | 3            | VATF_HUMAN           |
| Q16864                                                                                              | 2             | 3.2208           | R.GM#FTAEDLR.-                     | 1            | VATF_HUMAN           |
| Q16864                                                                                              | 2             | 3.312            | R.GMFTAEDLR.-                      | 2            | VATF_HUMAN           |

| <i>Accession No*</i>                                                                         | <i>Charge</i> | <i>XC(Max)**</i> | <i>Peptide*</i>            | <i>TC***</i> | <i>Reference No*</i> |
|----------------------------------------------------------------------------------------------|---------------|------------------|----------------------------|--------------|----------------------|
| <b><i>Vacuolar ATP synthase subunit G 1 - Homo sapiens (Human)</i></b>                       |               |                  |                            |              |                      |
| O75348                                                                                       | 2             | 4.7754           | K.QAKEEAQAEIEQYR.L         | 4            | VATG1_HUMAN          |
| O75348                                                                                       | 3             | 5.0231           | R.LKQAKEEAQAEIEQYR.L       | 2            | VATG1_HUMAN          |
| O75348                                                                                       | 2             | 4.2552           | R.GSCSTEVEKETQEK.M         | 2            | VATG1_HUMAN          |
| O75348                                                                                       | 2             | 3.4933           | K.M#TILQTYFR.Q             | 2            | VATG1_HUMAN          |
| O75348                                                                                       | 2             | 3.5784           | K.AKEAAALGSR.G             | 3            | VATG1_HUMAN          |
| O75348                                                                                       | 2             | 3.6114           | K.MTILQTYFR.Q              | 3            | VATG1_HUMAN          |
| <b><i>Vacuolar protein sorting 37 homolog C - Homo sapiens (Human)</i></b>                   |               |                  |                            |              |                      |
| A5D8V6                                                                                       | 3             | 4.3412           | K.FLEGEVPLETFLENFSSM#R.M   | 1            | A5D8V6_HUMAN         |
| <b><i>Vacuolar protein sorting-associated protein 13C - Homo sapiens (Human)</i></b>         |               |                  |                            |              |                      |
| Q709C8                                                                                       | 2             | 4.6707           | R.GVVGGVTGIITKPVEGAK.K     | 2            | VP13C_HUMAN          |
| <b><i>Vacuolar protein sorting-associated protein 54 - Homo sapiens (Human)</i></b>          |               |                  |                            |              |                      |
| Q9P1Q0                                                                                       | 2             | 2.7228           | R.KSTSLLGALQSQAIF          | 1            | VPS54_HUMAN          |
| <b><i>Vacuolar protein sorting-associated protein 72 homolog - Homo sapiens (Human)</i></b>  |               |                  |                            |              |                      |
| Q15906                                                                                       | 2             | 3.5478           | R.KVNTPAGSSQK.A            | 8            | VPS72_HUMAN          |
| <b><i>Vascular cell adhesion protein 1 precursor - Homo sapiens (Human)</i></b>              |               |                  |                            |              |                      |
| P19320                                                                                       | 2             | 4.7374           | K.SLEVTFTPVIEDIGK.V        | 2            | VCAM1_HUMAN          |
| P19320                                                                                       | 2             | 3.536            | K.SQEFLEDADRK.S            | 1            | VCAM1_HUMAN          |
| P19320                                                                                       | 1             | 2.9966           | K.NTVISVNPSTK.L            | 3            | VCAM1_HUMAN          |
| P19320                                                                                       | 3             | 4.6982           | K.EVELIVQEKPFVTEISPGPR.I   | 1            | VCAM1_HUMAN          |
| P19320                                                                                       | 2             | 3.3776           | R.QSTQTLVNVNAPR.D          | 2            | VCAM1_HUMAN          |
| <b><i>Vascular endothelial growth factor receptor 2 precursor - Homo sapiens (Human)</i></b> |               |                  |                            |              |                      |
| P35968                                                                                       | 2             | 3.1033           | K.TFEDIPLLEEPEVK.V         | 1            | VGFR2_HUMAN          |
| <b><i>Vasodilator-stimulated phosphoprotein - Homo sapiens (Human)</i></b>                   |               |                  |                            |              |                      |
| P50552                                                                                       | 2             | 3.6974           | R.SGGGGLM#EEMNAMLAR.R      | 6            | VASP_HUMAN           |
| P50552                                                                                       | 2             | 3.005            | K.QEEASGGPTAPK.A           | 1            | VASP_HUMAN           |
| P50552                                                                                       | 2             | 3.2625           | R.WLPAGTGPAQAFSR.V         | 2            | VASP_HUMAN           |
| P50552                                                                                       | 2             | 2.705            | R.VPAQSESVR.R              | 2            | VASP_HUMAN           |
| P50552                                                                                       | 3             | 3.7227           | R.VKQELLEEVKK.E            | 1            | VASP_HUMAN           |
| P50552                                                                                       | 2             | 3.4735           | R.SGGGGLMEEMNAM#LAR.R      | 5            | VASP_HUMAN           |
| P50552                                                                                       | 2             | 3.3875           | R.SGGGGLMEEM#NAM#LAR.R     | 2            | VASP_HUMAN           |
| P50552                                                                                       | 2             | 4.8727           | R.KVSKQEEASGGPTAPK.A       | 2            | VASP_HUMAN           |
| P50552                                                                                       | 3             | 5.7431           | K.VSKQEEASGGPTAPK.A        | 6            | VASP_HUMAN           |
| P50552                                                                                       | 3             | 5.6284           | K.ATQVGEKTPKDESANQEEPEAR.V | 2            | VASP_HUMAN           |
| P50552                                                                                       | 3             | 4.5728           | K.TPKDESANQEEPEAR.V        | 9            | VASP_HUMAN           |

| <i>Accession No*</i>                                                                                | <i>Charge</i> | <i>XC(Max)**</i> | <i>Peptide*</i>                 | <i>TC***</i> | <i>Reference No*</i> |
|-----------------------------------------------------------------------------------------------------|---------------|------------------|---------------------------------|--------------|----------------------|
| P50552                                                                                              | 3             | 4.9247           | K.VKEEIIEAFVQELR.K              | 3            | VASP_HUMAN           |
| P50552                                                                                              | 2             | 3.7395           | K.DESANQEEPEAR.V                | 5            | VASP_HUMAN           |
| P50552                                                                                              | 2             | 3.6053           | R.SGGGGLM#EEMNAM#LAR.R          | 1            | VASP_HUMAN           |
| <b><i>Vasohibin-1 - Homo sapiens (Human)</i></b>                                                    |               |                  |                                 |              |                      |
| Q7L8A9                                                                                              | 2             | 3.4201           | K.VAGGGSSGATPTSAAATAPSGVR.R     | 1            | VASH1_HUMAN          |
| <b><i>Vasorin precursor - Homo sapiens (Human)</i></b>                                              |               |                  |                                 |              |                      |
| Q6EMK4                                                                                              | 2             | 2.7073           | R.YLQGSVQLR.S                   | 1            | VASN_HUMAN           |
| <b><i>Versican core protein precursor - Homo sapiens (Human)</i></b>                                |               |                  |                                 |              |                      |
| P13611                                                                                              | 2             | 2.7458           | R.RTWDAER.E                     | 1            | CSPG2_HUMAN          |
| P13611                                                                                              | 3             | 3.8157           | R.SPQETYDVYCYVDHLDGDFHFLTVPSK.F | 1            | CSPG2_HUMAN          |
| P13611                                                                                              | 2             | 2.8252           | R.STDGSFQDR.F                   | 1            | CSPG2_HUMAN          |
| P13611                                                                                              | 2             | 3.2135           | R.TQEEYEDKK.H                   | 5            | CSPG2_HUMAN          |
| P13611                                                                                              | 1             | 2.5671           | R.TWDAER.E                      | 1            | CSPG2_HUMAN          |
| P13611                                                                                              | 2             | 4.1177           | R.VGHDYQWIGLNDK.M               | 2            | CSPG2_HUMAN          |
| P13611                                                                                              | 2             | 2.9294           | R.YEINSLIR.Y                    | 2            | CSPG2_HUMAN          |
| P13611                                                                                              | 2             | 3.6995           | R.LGEPNYGAEIR.G                 | 4            | CSPG2_HUMAN          |
| P13611                                                                                              | 2             | 3.6954           | R.YTLNFEAAQK.A                  | 3            | CSPG2_HUMAN          |
| P13611                                                                                              | 2             | 3.2699           | R.VSVPTHEAVGDASLTVVK.L          | 1            | CSPG2_HUMAN          |
| P13611                                                                                              | 2             | 2.7053           | K.IEVDKNGK.D                    | 1            | CSPG2_HUMAN          |
| P13611                                                                                              | 3             | 6.3061           | R.LQGAHLTSILSHEEQMFVNR.V        | 3            | CSPG2_HUMAN          |
| P13611                                                                                              | 2             | 2.8262           | K.DNSINTSK.H                    | 1            | CSPG2_HUMAN          |
| P13611                                                                                              | 3             | 5.3537           | R.LQGAHLTSILSHEEQM#FVNR.V       | 2            | CSPG2_HUMAN          |
| P13611                                                                                              | 2             | 2.7926           | K.IGQDYKGR.V                    | 2            | CSPG2_HUMAN          |
| P13611                                                                                              | 2             | 3.324            | K.ITCMNPSAYQR.T                 | 4            | CSPG2_HUMAN          |
| P13611                                                                                              | 2             | 4.9334           | K.KGTVACGQPPVVENAK.T            | 2            | CSPG2_HUMAN          |
| P13611                                                                                              | 2             | 3.8793           | K.LLASDAGLYR.C                  | 7            | CSPG2_HUMAN          |
| P13611                                                                                              | 2             | 4.5728           | R.AATSRYTLNFEAAQK.A             | 3            | CSPG2_HUMAN          |
| P13611                                                                                              | 2             | 3.6093           | R.AQCGGLLGVR.T                  | 5            | CSPG2_HUMAN          |
| P13611                                                                                              | 2             | 4.115            | R.LATVGELQAAWR.N                | 9            | CSPG2_HUMAN          |
| <b><i>Vesicle transport through interaction with t-SNAREs homolog 1B - Homo sapiens (Human)</i></b> |               |                  |                                 |              |                      |
| Q9UEU0                                                                                              | 3             | 4.0653           | K.LIRDFDEKQQEANETLAEMEEELR.Y    | 1            | VTI1B_HUMAN          |
| Q9UEU0                                                                                              | 2             | 3.2904           | R.LLGTAGTEEK.K                  | 1            | VTI1B_HUMAN          |
| <b><i>Vesicle-associated membrane protein 2 - Homo sapiens (Human)</i></b>                          |               |                  |                                 |              |                      |
| P63027                                                                                              | 3             | 4.9147           | R.LQQTQAQVDEVVDIMR.V            | 1            | VAMP2_HUMAN          |
| <b><i>Vesicle-associated membrane protein 3 - Homo sapiens (Human)</i></b>                          |               |                  |                                 |              |                      |



| <i>Accession No*</i>                                                                            | <i>Charge</i> | <i>XC(Max)**</i> | <i>Peptide*</i>                     | <i>TC***</i> | <i>Reference No*</i> |
|-------------------------------------------------------------------------------------------------|---------------|------------------|-------------------------------------|--------------|----------------------|
| Q15836                                                                                          | 2             | 5.1901           | R.LQQTQNVQDEVVDIM#R.V               | 3            | VAMP3_HUMAN          |
| Q15836                                                                                          | 2             | 4.0892           | R.LQQTQNVQDEVVDIMR.V                | 5            | VAMP3_HUMAN          |
| Q15836                                                                                          | 3             | 4.5014           | R.RLQQTQNVQDEVVDIMR.V               | 5            | VAMP3_HUMAN          |
| <b><i>Vesicle-associated membrane protein 8 - Homo sapiens (Human)</i></b>                      |               |                  |                                     |              |                      |
| Q9BV40                                                                                          | 3             | 5.1015           | R.NLQSEVEGVKNIMTQNVER.I             | 3            | VAMP8_HUMAN          |
| Q9BV40                                                                                          | 2             | 3.1137           | R.NLQSEVEGVK.N                      | 4            | VAMP8_HUMAN          |
| Q9BV40                                                                                          | 3             | 3.879            | R.NKTEDLEATSEHFK.T                  | 1            | VAMP8_HUMAN          |
| Q9BV40                                                                                          | 2             | 2.7064           | R.GENLEHLR.N                        | 1            | VAMP8_HUMAN          |
| Q9BV40                                                                                          | 2             | 3.2659           | K.NIMTQNVER.I                       | 2            | VAMP8_HUMAN          |
| <b><i>Vesicle-associated membrane protein-associated protein A - Homo sapiens (Human)</i></b>   |               |                  |                                     |              |                      |
| Q9P0L0                                                                                          | 2             | 4.6618           | K.FKGPFTDVVTTNLK.L                  | 4            | VAPA_HUMAN           |
| Q9P0L0                                                                                          | 3             | 3.9019           | K.HEQILVLDPPPTDLKFK.G               | 2            | VAPA_HUMAN           |
| Q9P0L0                                                                                          | 2             | 4.8815           | K.HEQILVLDPPPTDLK.F                 | 4            | VAPA_HUMAN           |
| <b><i>Vesicle-associated membrane protein-associated protein B/C - Homo sapiens (Human)</i></b> |               |                  |                                     |              |                      |
| O95292                                                                                          | 2             | 4.9818           | K.FRGPFTDVVTTNLK.L                  | 2            | VAPB_HUMAN           |
| O95292                                                                                          | 2             | 4.9873           | K.VEQVLSLEPQHELK.F                  | 5            | VAPB_HUMAN           |
| <b><i>Vesicle-trafficking protein SEC22b - Homo sapiens (Human)</i></b>                         |               |                  |                                     |              |                      |
| O75396                                                                                          | 3             | 4.8216           | R.IMVANIEEVLQRGEALSALDSK.A          | 2            | SC22B_HUMAN          |
| <b><i>Vesicular integral-membrane protein VIP36 precursor - Homo sapiens (Human)</i></b>        |               |                  |                                     |              |                      |
| Q12907                                                                                          | 2             | 3.2467           | K.DNVDDPTGNFR.S                     | 1            | LMAN2_HUMAN          |
| <b><i>Vimentin - Homo sapiens (Human)</i></b>                                                   |               |                  |                                     |              |                      |
| P08670                                                                                          | 2             | 4.1528           | R.ISLPLPNFSSLNLR.E                  | 39           | VIME_HUMAN           |
| P08670                                                                                          | 3             | 3.9417           | R.ISLPLPNFSSLNLRRETNLDSLPLVDTHSKR.T | 1            | VIME_HUMAN           |
| P08670                                                                                          | 2             | 3.7195           | R.LGDLYEEEM#R.E                     | 5            | VIME_HUMAN           |
| P08670                                                                                          | 2             | 3.8633           | R.LGDLYEEEMR.E                      | 5            | VIME_HUMAN           |
| P08670                                                                                          | 2             | 3.0715           | R.LGDLYEEEMREL.R                    | 5            | VIME_HUMAN           |
| P08670                                                                                          | 3             | 6.0651           | R.LLQDSVDFSLADAINTEFK.N             | 241          | VIME_HUMAN           |
| P08670                                                                                          | 3             | 3.9249           | R.LLQDSVDFSLADAINTEFKNTR.T          | 3            | VIME_HUMAN           |
| P08670                                                                                          | 2             | 3.5699           | R.M#FGGPGTASR.P                     | 3            | VIME_HUMAN           |
| P08670                                                                                          | 1             | 3.0482           | R.MFGGPGTASR.P                      | 4            | VIME_HUMAN           |
| P08670                                                                                          | 2             | 3.2642           | R.MFGGPGTASRPSSSR.S                 | 2            | VIME_HUMAN           |
| P08670                                                                                          | 1             | 2.1599           | R.QVDQLTNDKAR.V                     | 1            | VIME_HUMAN           |
| P08670                                                                                          | 2             | 5.6444           | R.RQVDQLTNDKAR.V                    | 6            | VIME_HUMAN           |
| P08670                                                                                          | 2             | 3.0015           | R.RMFGGPGTASRPSSSR.S                | 1            | VIME_HUMAN           |
| P08670                                                                                          | 2             | 4.6721           | R.VEVERDNLAEDIMR.L                  | 18           | VIME_HUMAN           |

| <i>Accession No*</i>                                                                 | <i>Charge</i> | <i>XC(Max)**</i> | <i>Peptide*</i>            | <i>TC***</i> | <i>Reference No*</i> |
|--------------------------------------------------------------------------------------|---------------|------------------|----------------------------|--------------|----------------------|
| P08670                                                                               | 2             | 3.6188           | R.RQVDQLTNDK.A             | 5            | VIME_HUMAN           |
| P08670                                                                               | 1             | 2.4845           | R.SVSSSSYR.R               | 8            | VIME_HUMAN           |
| P08670                                                                               | 4             | 4.7792           | R.TNEKVELQELNDRFANYIDK.V   | 4            | VIME_HUMAN           |
| P08670                                                                               | 2             | 2.932            | R.TYSLGSALRPSTSR.S         | 6            | VIME_HUMAN           |
| P08670                                                                               | 3             | 5.1779           | R.VEVERDNLAEDIM#R.L        | 6            | VIME_HUMAN           |
| P08670                                                                               | 2             | 3.6559           | R.RMFGGPGTASR.P            | 1            | VIME_HUMAN           |
| P08670                                                                               | 2             | 4.1684           | K.VELQELNDRFANYIDK.V       | 2            | VIME_HUMAN           |
| P08670                                                                               | 2             | 4.5624           | R.SLYASSPGGVYATR.S         | 23           | VIME_HUMAN           |
| P08670                                                                               | 2             | 4.5089           | K.ILLAELEQLK.G             | 10           | VIME_HUMAN           |
| P08670                                                                               | 2             | 5.1085           | K.ILLAELEQLKGQGK.S         | 19           | VIME_HUMAN           |
| P08670                                                                               | 2             | 4.4037           | K.SRLGDLYEEEM#R.E          | 4            | VIME_HUMAN           |
| P08670                                                                               | 2             | 4.3908           | K.SRLGDLYEEEMR.E           | 11           | VIME_HUMAN           |
| P08670                                                                               | 3             | 6.9492           | R.FLEQQNKILLAELEQLKGQGK.S  | 5            | VIME_HUMAN           |
| P08670                                                                               | 3             | 5.6405           | K.TVETRDGQVINETSQHDDLE.-   | 19           | VIME_HUMAN           |
| P08670                                                                               | 2             | 4.1579           | R.DGQVINETSQHDDLE.-        | 14           | VIME_HUMAN           |
| P08670                                                                               | 2             | 3.0847           | R.DNLAEDIM#R.L             | 2            | VIME_HUMAN           |
| P08670                                                                               | 2             | 2.7384           | R.FANYIDK.V                | 1            | VIME_HUMAN           |
| P08670                                                                               | 2             | 3.0152           | K.SRLGDLYEEEMREL.R         | 1            | VIME_HUMAN           |
| P08670                                                                               | 2             | 3.6905           | R.FANYIDKVR.F              | 6            | VIME_HUMAN           |
| P08670                                                                               | 2             | 3.3028           | R.DNLAEDIMR.L              | 3            | VIME_HUMAN           |
| P08670                                                                               | 2             | 3.6814           | R.ETNLDLPLVDTHSKR.T        | 5            | VIME_HUMAN           |
| P08670                                                                               | 2             | 3.5986           | R.ETNLDLPLVDTHSK.R         | 6            | VIME_HUMAN           |
| P08670                                                                               | 2             | 4.5237           | R.EKLQEEMLQREEAENTLQSFR.Q  | 4            | VIME_HUMAN           |
| P08670                                                                               | 2             | 3.1379           | R.EKLQEEMLQR.E             | 4            | VIME_HUMAN           |
| P08670                                                                               | 3             | 4.3743           | R.EKLQEEM#LQREEAENTLQSFR.Q | 1            | VIME_HUMAN           |
| P08670                                                                               | 2             | 2.9464           | R.EKLQEEM#LQR.E            | 1            | VIME_HUMAN           |
| P08670                                                                               | 3             | 4.3204           | R.FLEQQNKILLAELEQLK.G      | 1            | VIME_HUMAN           |
| <b><i>Vimentin-type IF-associated coiled-coil protein - Homo sapiens (Human)</i></b> |               |                  |                            |              |                      |
| Q2NL98                                                                               | 3             | 3.815            | R.RPPLAGLLDALAEAER.L       | 1            | Q2NL98_HUMAN         |
| Q2NL98                                                                               | 3             | 4.2427           | R.RRPPLAGLLDALAEAER.L      | 3            | Q2NL98_HUMAN         |
| <b><i>Vinculin - Homo sapiens (Human)</i></b>                                        |               |                  |                            |              |                      |
| P18206                                                                               | 3             | 4.1783           | K.AIPDLTAPVAAVQAASNLVR.V   | 1            | VINC_HUMAN           |
| P18206                                                                               | 2             | 3.9881           | R.DPSASPGDAGEQAIR.Q        | 4            | VINC_HUMAN           |
| <b><i>Vinexin - Homo sapiens (Human)</i></b>                                         |               |                  |                            |              |                      |
| O60504                                                                               | 3             | 4.8803           | K.KPLVDDPGEKPSQPIEVLLER.E  | 1            | VINEX_HUMAN          |

| <i>Accession No*</i>                                                                   | <i>Charge</i> | <i>XC(Max)**</i> | <i>Peptide*</i>                   | <i>TC***</i> | <i>Reference No*</i> |
|----------------------------------------------------------------------------------------|---------------|------------------|-----------------------------------|--------------|----------------------|
| O60504                                                                                 | 2             | 2.8544           | R.PAHRPGPATSSSGR.S                | 1            | VINEX_HUMAN          |
| O60504                                                                                 | 2             | 5.0382           | R.SPADPTDLGGQTSR.R                | 5            | VINEX_HUMAN          |
| <b><i>Vitamin D-binding protein variant - Homo sapiens (Human)</i></b>                 |               |                  |                                   |              |                      |
| Q53F31                                                                                 | 2             | 3.2422           | K.AKLPEATPTELAK.L                 | 2            | Q53F31_HUMAN         |
| Q53F31                                                                                 | 2             | 3.6917           | K.LPEATPTELAK.L                   | 2            | Q53F31_HUMAN         |
| <b><i>Vitronectin precursor - Homo sapiens (Human)</i></b>                             |               |                  |                                   |              |                      |
| P04004                                                                                 | 2             | 3.353            | R.SIAQYWLGCAPAGHL.-               | 1            | VTNC_HUMAN           |
| P04004                                                                                 | 3             | 4.9391           | K.LIRDVWVWIEGPIDAAFTR.I           | 1            | VTNC_HUMAN           |
| P04004                                                                                 | 2             | 4.3322           | R.DVWVWVWIEGPIDAAFTR.I            | 6            | VTNC_HUMAN           |
| P04004                                                                                 | 3             | 6.0197           | R.DWHGVPGQVDAAM#AGR.I             | 3            | VTNC_HUMAN           |
| P04004                                                                                 | 3             | 4.4682           | R.DWHGVPGQVDAAMAGR.I              | 4            | VTNC_HUMAN           |
| P04004                                                                                 | 2             | 3.994            | R.FEDGVLPDPYPR.N                  | 4            | VTNC_HUMAN           |
| P04004                                                                                 | 2             | 3.2102           | R.GQYCYELDEK.A                    | 1            | VTNC_HUMAN           |
| P04004                                                                                 | 2             | 3.614            | R.IYISGMAPR.P                     | 2            | VTNC_HUMAN           |
| <b><i>Von Willebrand factor A domain containing 1 - Homo sapiens (Human)</i></b>       |               |                  |                                   |              |                      |
| Q6PCB0                                                                                 | 2             | 4.7355           | R.EFVQQLVAPLPLGTGALR.A            | 2            | Q6PCB0_HUMA          |
| <b><i>von Willebrand factor precursor - Homo sapiens (Human)</i></b>                   |               |                  |                                   |              |                      |
| P04275                                                                                 | 2             | 2.9915           | R.VEDFGNAWK.L                     | 2            | VWF_HUMAN            |
| P04275                                                                                 | 2             | 3.2308           | R.ILAGPAGDSNVVK.L                 | 2            | VWF_HUMAN            |
| <b><i>VPS10 domain-containing receptor SorCS1 precursor - Homo sapiens (Human)</i></b> |               |                  |                                   |              |                      |
| Q8WY21                                                                                 | 2             | 2.9222           | R.ARGTGASM#AVAAR.S                | 1            | SORC1_HUMAN          |
| <b><i>WAS/WASL-interacting protein family member 2 - Homo sapiens (Human)</i></b>      |               |                  |                                   |              |                      |
| Q8TF74                                                                                 | 2             | 2.8465           | K.KVTNINDR.S                      | 1            | WIPF2_HUMAN          |
| Q8TF74                                                                                 | 2             | 4.7721           | R.TGPSGQSLAPPPPPYR.Q              | 3            | WIPF2_HUMAN          |
| Q8TF74                                                                                 | 2             | 3.1501           | K.GGLFQGGVLK.L                    | 1            | WIPF2_HUMAN          |
| Q8TF74                                                                                 | 4             | 5.6925           | R.SFLDDFESKYSFHPVEDFPAPEEYKHFQR.I | 1            | WIPF2_HUMAN          |
| Q8TF74                                                                                 | 2             | 3.0373           | R.TPAGPPPPPPPLR.N                 | 2            | WIPF2_HUMAN          |
| Q8TF74                                                                                 | 3             | 4.147            | K.HSSSAPPPPPGRR.A                 | 1            | WIPF2_HUMAN          |
| Q8TF74                                                                                 | 2             | 3.0903           | K.GSSGGYGSAGGALQPK.G              | 2            | WIPF2_HUMAN          |
| Q8TF74                                                                                 | 3             | 4.5587           | K.DGSENLAGKPALQIPSSR.A            | 5            | WIPF2_HUMAN          |
| Q8TF74                                                                                 | 2             | 3.1439           | K.HSSSAPPPPPGRR.R                 | 2            | WIPF2_HUMAN          |
| <b><i>WD repeat and HMG-box DNA-binding protein 1 - Homo sapiens (Human)</i></b>       |               |                  |                                   |              |                      |
| O75717                                                                                 | 2             | 3.1693           | R.VVDESDETENQEEK.A                | 2            | WDHD1_HUMAN          |
| <b><i>WD repeat protein 22 - Homo sapiens (Human)</i></b>                              |               |                  |                                   |              |                      |
| Q96JK2                                                                                 | 2             | 3.7041           | R.EDPTDTPATDSSR.A                 | 1            | WDR22_HUMAN          |

| <i>Accession No*</i>                                                                  | <i>Charge</i> | <i>XC(Max)**</i> | <i>Peptide*</i>                    | <i>TC***</i> | <i>Reference No*</i> |
|---------------------------------------------------------------------------------------|---------------|------------------|------------------------------------|--------------|----------------------|
| <b><i>WD repeat protein 33 - Homo sapiens (Human)</i></b>                             |               |                  |                                    |              |                      |
| Q9C0J8                                                                                | 2             | 2.7335           | K.TPLLGDGPR.A                      | 1            | WDR33_HUMAN          |
| Q9C0J8                                                                                | 3             | 6.1863           | R.GRDGFPGPEDFGPEENFDASEEAAR.G      | 2            | WDR33_HUMAN          |
| Q9C0J8                                                                                | 3             | 4.1777           | R.HEQSGGPEHGPER.G                  | 1            | WDR33_HUMAN          |
| <b><i>WD repeat protein 44 - Homo sapiens (Human)</i></b>                             |               |                  |                                    |              |                      |
| Q5JSH3                                                                                | 2             | 3.8753           | K.IIESIIEESQK.V                    | 5            | WDR44_HUMAN          |
| Q5JSH3                                                                                | 3             | 6.113            | K.VLQLEDDSLDSKKGKELSDQATASPIVAR.T  | 2            | WDR44_HUMAN          |
| Q5JSH3                                                                                | 2             | 3.4226           | K.VLQLEDDSLDSK.G                   | 2            | WDR44_HUMAN          |
| Q5JSH3                                                                                | 2             | 5.0723           | K.KIIESIIEESQK.V                   | 2            | WDR44_HUMAN          |
| Q5JSH3                                                                                | 2             | 4.8105           | K.ELSDQATASPIVAR.T                 | 3            | WDR44_HUMAN          |
| Q5JSH3                                                                                | 2             | 3.0133           | K.VGNESPVQELK.Q                    | 2            | WDR44_HUMAN          |
| <b><i>WD repeat protein 91 - Homo sapiens (Human)</i></b>                             |               |                  |                                    |              |                      |
| A4D1P6                                                                                | 2             | 2.7589           | K.KESFGGQGTK.G                     | 2            | WDR91_HUMAN          |
| A4D1P6                                                                                | 2             | 4.1036           | R.LSPAQGPQPQSSAK.K                 | 6            | WDR91_HUMAN          |
| <b><i>Wilms tumor 1-associating protein - Homo sapiens (Human)</i></b>                |               |                  |                                    |              |                      |
| Q15007                                                                                | 2             | 3.6076           | R.STMVDPAINLFFLK.M                 | 2            | WTAP_HUMAN           |
| Q15007                                                                                | 2             | 3.9064           | R.TTASEPVEQSEATSK.D                | 2            | WTAP_HUMAN           |
| <b><i>Wings apart-like protein homolog - Homo sapiens (Human)</i></b>                 |               |                  |                                    |              |                      |
| Q7Z5K2                                                                                | 3             | 3.8246           | K.RPNFKPDIQEIPK.K                  | 2            | WAPL_HUMAN           |
| Q7Z5K2                                                                                | 3             | 4.434            | K.SSQGASNFDKLMDGTSQALAK.A          | 1            | WAPL_HUMAN           |
| Q7Z5K2                                                                                | 2             | 2.9845           | K.WGETTFMAK.L                      | 1            | WAPL_HUMAN           |
| Q7Z5K2                                                                                | 2             | 3.7709           | R.IVEDDASISSCNK.L                  | 2            | WAPL_HUMAN           |
| Q7Z5K2                                                                                | 2             | 3.3539           | R.SM#DEFTASTPADLGEAGR.L            | 1            | WAPL_HUMAN           |
| <b><i>Wiskott-Aldrich syndrome protein - Homo sapiens (Human)</i></b>                 |               |                  |                                    |              |                      |
| P42768                                                                                | 3             | 4.916            | K.LIYDFIEDQGGLEAVR.Q               | 1            | WASP_HUMAN           |
| P42768                                                                                | 2             | 4.9624           | R.AGISEAQLTDAETSK.L                | 3            | WASP_HUMAN           |
| P42768                                                                                | 3             | 4.6966           | K.HVSHVGVDPQNGFDVNNLDPDLR.S        | 2            | WASP_HUMAN           |
| P42768                                                                                | 3             | 3.8638           | R.AGISEAQLTDAETSKLIYDFIEDQGGLEAVRQ | 1            | WASP_HUMAN           |
| <b><i>Wiskott-Aldrich syndrome protein family member 2 - Homo sapiens (Human)</i></b> |               |                  |                                    |              |                      |
| Q9Y6W5                                                                                | 3             | 4.1263           | K.VTQLDPKEEEVSLQGINTR.K            | 2            | WASF2_HUMAN          |
| Q9Y6W5                                                                                | 2             | 5.405            | R.DVVGNDVATILSR.R                  | 3            | WASF2_HUMAN          |
| Q9Y6W5                                                                                | 2             | 3.2867           | R.SDLLSAIR.Q                       | 3            | WASF2_HUMAN          |
| <b><i>Wolframin - Homo sapiens (Human)</i></b>                                        |               |                  |                                    |              |                      |
| O76024                                                                                | 2             | 3.3975           | R.DAAAPAEPQAQHTR.S                 | 2            | WFS1_HUMAN           |
| <b><i>WW domain-binding protein 11 - Homo sapiens (Human)</i></b>                     |               |                  |                                    |              |                      |

| <i>Accession No*</i>                                                                        | <i>Charge</i> | <i>XC(Max)**</i> | <i>Peptide*</i>                   | <i>TC***</i> | <i>Reference No*</i> |
|---------------------------------------------------------------------------------------------|---------------|------------------|-----------------------------------|--------------|----------------------|
| Q9Y2W2                                                                                      | 2             | 4.0544           | K.ATATISAKPQITNPK.A               | 3            | WBP11_HUMAN          |
| Q9Y2W2                                                                                      | 2             | 3.6159           | R.AVSILPLLGHGVPR.L                | 2            | WBP11_HUMAN          |
| Q9Y2W2                                                                                      | 2             | 2.8043           | R.RRDEDMLYSPELAQR.G               | 2            | WBP11_HUMAN          |
| Q9Y2W2                                                                                      | 3             | 4.2651           | R.LYEKENPDIYKELR.K                | 2            | WBP11_HUMAN          |
| Q9Y2W2                                                                                      | 2             | 2.8487           | R.KSEDDSAVPLAK.A                  | 1            | WBP11_HUMAN          |
| Q9Y2W2                                                                                      | 3             | 5.8852           | R.KPPGPPPGPPPPQVVQMYGR.K          | 2            | WBP11_HUMAN          |
| Q9Y2W2                                                                                      | 3             | 3.9047           | R.DM#EKLDEMEFNPVQQPQLNEK.V        | 1            | WBP11_HUMAN          |
| Q9Y2W2                                                                                      | 2             | 2.7207           | R.DEDM#LYSPELAQR.G                | 1            | WBP11_HUMAN          |
| Q9Y2W2                                                                                      | 2             | 3.6573           | K.SEDDSAVPLAK.A                   | 3            | WBP11_HUMAN          |
| Q9Y2W2                                                                                      | 2             | 3.6325           | K.RAQLSQYFDAVK.N                  | 2            | WBP11_HUMAN          |
| Q9Y2W2                                                                                      | 3             | 4.838            | K.QIIRDMEKLEMEFNPVQQPQLNEK.V      | 1            | WBP11_HUMAN          |
| Q9Y2W2                                                                                      | 2             | 3.3535           | K.ADDTSAATIEK.K                   | 2            | WBP11_HUMAN          |
| Q9Y2W2                                                                                      | 2             | 2.9576           | K.ELTPLQAMMLR.M                   | 2            | WBP11_HUMAN          |
| Q9Y2W2                                                                                      | 4             | 7.4373           | K.NAQHVEVESIPLDMPHAPSNIHQDIPLPGAQ | 1            | WBP11_HUMAN          |
| Q9Y2W2                                                                                      | 2             | 3.0979           | K.ADDTSAATIEKK.A                  | 2            | WBP11_HUMAN          |
| Q9Y2W2                                                                                      | 2             | 3.6228           | R.AQLSQYFDAVK.N                   | 3            | WBP11_HUMAN          |
| <b><i>WW domain-binding protein 4 - Homo sapiens (Human)</i></b>                            |               |                  |                                   |              |                      |
| O75554                                                                                      | 2             | 2.9677           | K.NSDGGSDPETQKEK.S                | 1            | WBP4_HUMAN           |
| O75554                                                                                      | 2             | 3.3107           | K.SLDKAKEEEK.A                    | 2            | WBP4_HUMAN           |
| O75554                                                                                      | 2             | 4.0613           | K.TVTSLGVMDAGVAPVFK.K             | 2            | WBP4_HUMAN           |
| <b><i>WW domain-containing adapter protein with coiled-coil - Homo sapiens (Human)</i></b>  |               |                  |                                   |              |                      |
| Q9BTA9                                                                                      | 2             | 3.4633           | R.RGDSQPQYQALK.Y                  | 2            | WAC_HUMAN            |
| <b><i>WW domain-containing transcription regulator protein 1 - Homo sapiens (Human)</i></b> |               |                  |                                   |              |                      |
| Q9GZV5                                                                                      | 3             | 3.864            | R.SHSSPASLQLGTGAGAAGSPAQQHAHLR.Q  | 1            | WWTR1_HUMA           |
| <b><i>XPA-binding protein 1 - Homo sapiens (Human)</i></b>                                  |               |                  |                                   |              |                      |
| Q9HCN4                                                                                      | 2             | 4.1201           | K.DM#GSVALDAGTAK.D                | 2            | XAB1_HUMAN           |
| <b><i>YLP motif-containing protein 1 - Homo sapiens (Human)</i></b>                         |               |                  |                                   |              |                      |
| P49750                                                                                      | 3             | 3.7968           | K.AQAVTQPVLANKPVPVPAQSTFPSK.T     | 1            | YLPM1_HUMAN          |
| P49750                                                                                      | 2             | 3.0533           | R.YEGHPAEGTK.S                    | 2            | YLPM1_HUMAN          |
| P49750                                                                                      | 2             | 3.4082           | R.VGFQYQGIMQK.H                   | 2            | YLPM1_HUMAN          |
| P49750                                                                                      | 2             | 2.7323           | R.RFEDLGSR.C                      | 1            | YLPM1_HUMAN          |
| P49750                                                                                      | 2             | 3.4663           | R.STFETE HAGQR.D                  | 3            | YLPM1_HUMAN          |
| P49750                                                                                      | 2             | 4.319            | R.DISTNKVEQIPYGER.I               | 4            | YLPM1_HUMAN          |
| P49750                                                                                      | 3             | 4.6324           | R.AIGFVVGQTDWEKITDESGHLAEK.A      | 1            | YLPM1_HUMAN          |
| P49750                                                                                      | 2             | 4.4686           | K.GPKPAFGQQHQQPK.S                | 3            | YLPM1_HUMAN          |

| <i>Accession No*</i>                                                                   | <i>Charge</i> | <i>XC(Max)**</i> | <i>Peptide*</i>              | <i>TC***</i> | <i>Reference No*</i> |
|----------------------------------------------------------------------------------------|---------------|------------------|------------------------------|--------------|----------------------|
| P49750                                                                                 | 2             | 5.6858           | K.SQAEPLSGNKEPLADTSSNQK.N    | 6            | YLPM1_HUMAN          |
| P49750                                                                                 | 2             | 3.2037           | R.HFDQFWSAAK.T               | 1            | YLPM1_HUMAN          |
| <b><i>YTH domain family protein 1 - Homo sapiens (Human)</i></b>                       |               |                  |                              |              |                      |
| Q9BYJ9                                                                                 | 2             | 4.9921           | K.APGMNSLEQGMVGLK.I          | 3            | YTHD1_HUMAN          |
| Q9BYJ9                                                                                 | 3             | 4.598            | K.HNMDIGTWDNKGVPVK.A         | 2            | YTHD1_HUMAN          |
| Q9BYJ9                                                                                 | 2             | 3.0509           | K.IGDVSSSAVK.T               | 1            | YTHD1_HUMAN          |
| Q9BYJ9                                                                                 | 2             | 3.0302           | K.SGPVMGGGLPPPIK.H           | 1            | YTHD1_HUMAN          |
| <b><i>YTH domain family protein 2 - Homo sapiens (Human)</i></b>                       |               |                  |                              |              |                      |
| Q9Y5A9                                                                                 | 2             | 2.8072           | K.DGLNDDDFEPYLSPQAR.P        | 2            | YTHD2_HUMAN          |
| Q9Y5A9                                                                                 | 2             | 3.3654           | K.LGSTEVASNVPK.V             | 2            | YTHD2_HUMAN          |
| <b><i>YTH domain family protein 3 - Homo sapiens (Human)</i></b>                       |               |                  |                              |              |                      |
| Q7Z739                                                                                 | 3             | 4.0872           | K.HNM#NIGTWDEKGSVVK.A        | 1            | YTHD3_HUMAN          |
| Q7Z739                                                                                 | 2             | 3.0457           | K.HNMNIGTWDEK.G              | 2            | YTHD3_HUMAN          |
| Q7Z739                                                                                 | 3             | 4.5669           | K.HNMNIGTWDEKGSVVK.A         | 1            | YTHD3_HUMAN          |
| Q7Z739                                                                                 | 2             | 3.2184           | K.VPGISSIEQGM#TGLK.I         | 1            | YTHD3_HUMAN          |
| Q7Z739                                                                                 | 2             | 4.6054           | K.VPGISSIEQGMTGLK.I          | 5            | YTHD3_HUMAN          |
| Q7Z739                                                                                 | 2             | 3.7061           | K.GNVGIGGSAVPPPIK.H          | 2            | YTHD3_HUMAN          |
| <b><i>YTH domain-containing protein 1 - Homo sapiens (Human)</i></b>                   |               |                  |                              |              |                      |
| Q96MU7                                                                                 | 2             | 3.633            | R.RTQAVVSGR.R                | 2            | YTDC1_HUMAN          |
| Q96MU7                                                                                 | 2             | 4.0305           | K.SATEYKNEEYQR.S             | 3            | YTDC1_HUMAN          |
| Q96MU7                                                                                 | 2             | 3.5372           | R.QLVSKPLSSSVSNK.R           | 1            | YTDC1_HUMAN          |
| <b><i>YY1-associated factor 2 - Homo sapiens (Human)</i></b>                           |               |                  |                              |              |                      |
| Q8IY57                                                                                 | 2             | 3.0156           | R.GEASSLNGESH.-              | 1            | YAF2_HUMAN           |
| Q8IY57                                                                                 | 3             | 5.6065           | K.SPPASSAASADQHSQSGSSDNTER.G | 3            | YAF2_HUMAN           |
| <b><i>Zinc finger and BTB domain-containing protein 11 - Homo sapiens (Human)</i></b>  |               |                  |                              |              |                      |
| O95625                                                                                 | 3             | 4.3867           | K.DAPSSSSNSTSNEASGTSSEK.G    | 1            | ZBT11_HUMAN          |
| <b><i>Zinc finger and SCAN domain-containing protein 16 - Homo sapiens (Human)</i></b> |               |                  |                              |              |                      |
| Q9H4T2                                                                                 | 2             | 3.0432           | R.TKNEELFQKEDMPK.D           | 1            | ZSC16_HUMAN          |
| <b><i>Zinc finger and SCAN domain-containing protein 18 - Homo sapiens (Human)</i></b> |               |                  |                              |              |                      |
| Q8TBC5                                                                                 | 2             | 3.1588           | K.TEEDGPANTEQK.L             | 2            | ZSC18_HUMAN          |
| <b><i>Zinc finger CCCH domain-containing protein 11A - Homo sapiens (Human)</i></b>    |               |                  |                              |              |                      |
| O75152                                                                                 | 2             | 2.866            | K.AAVAVVPLVSEDK.S            | 1            | ZC11A_HUMAN          |
| O75152                                                                                 | 2             | 2.9573           | K.EASGETTGVDITK.I            | 1            | ZC11A_HUMAN          |
| O75152                                                                                 | 2             | 4.4555           | K.NLQEGNEVDSQSSIR.T          | 2            | ZC11A_HUMAN          |
| O75152                                                                                 | 3             | 4.1254           | R.VQQSSESSTSSPSQHEATPGAR.R   | 2            | ZC11A_HUMAN          |

| <i>Accession No*</i>                                                                    | <i>Charge</i> | <i>XC(Max)**</i> | <i>Peptide*</i>                   | <i>TC***</i> | <i>Reference No*</i> |
|-----------------------------------------------------------------------------------------|---------------|------------------|-----------------------------------|--------------|----------------------|
| <b><i>Zinc finger CCCH domain-containing protein 13 - Homo sapiens (Human)</i></b>      |               |                  |                                   |              |                      |
| Q5T200                                                                                  | 3             | 4.2372           | K.KKEDDVGIER.G                    | 1            | ZC313_HUMAN          |
| Q5T200                                                                                  | 2             | 3.066            | R.NTEESSSPVRK.E                   | 2            | ZC313_HUMAN          |
| <b><i>Zinc finger CCCH domain-containing protein 5 - Homo sapiens (Human)</i></b>       |               |                  |                                   |              |                      |
| Q9C0B0                                                                                  | 2             | 3.0568           | R.WQETAYVLGNYK.T                  | 1            | ZC3H5_HUMAN          |
| Q9C0B0                                                                                  | 3             | 3.959            | R.KPPNLEGIVFPGESGLAPGSYK.K        | 1            | ZC3H5_HUMAN          |
| <b><i>Zinc finger CCCH domain-containing protein C19orf7 - Homo sapiens (Human)</i></b> |               |                  |                                   |              |                      |
| Q9UPT8                                                                                  | 2             | 3.6899           | K.TGSGSPFAGNSPAR.E                | 3            | CS007_HUMAN          |
| Q9UPT8                                                                                  | 2             | 3.3242           | R.TVLWNPEDLIPLPIPK.Q              | 2            | CS007_HUMAN          |
| Q9UPT8                                                                                  | 3             | 4.2053           | R.QRPGASTDSSTQGANLPDFELLSR.I      | 1            | CS007_HUMAN          |
| Q9UPT8                                                                                  | 2             | 2.9895           | R.LQKPTDSTASSR.A                  | 1            | CS007_HUMAN          |
| Q9UPT8                                                                                  | 3             | 6.0338           | R.LPLPDDREDGELEEGELEDDGAEETQDTSG  | 1            | CS007_HUMAN          |
| Q9UPT8                                                                                  | 3             | 5.3045           | R.VLAAGGLGQGGGGGQSSVLSGISLYDPR.T  | 1            | CS007_HUMAN          |
| Q9UPT8                                                                                  | 2             | 4.2512           | R.HVEASGGSGPGDSGSPDPR.L           | 1            | CS007_HUMAN          |
| Q9UPT8                                                                                  | 3             | 4.1448           | R.AAKPGPAEAPSPTASPSGDASPPATAPYDPR | 1            | CS007_HUMAN          |
| Q9UPT8                                                                                  | 3             | 4.5535           | K.SALEQPETGKAGADGGTPTDR.Y         | 2            | CS007_HUMAN          |
| Q9UPT8                                                                                  | 2             | 4.0392           | K.GGMNDDDFYDEDMGDGGGGSYR.S        | 1            | CS007_HUMAN          |
| Q9UPT8                                                                                  | 2             | 2.818            | K.ATEPAADTGAQPK.G                 | 1            | CS007_HUMAN          |
| Q9UPT8                                                                                  | 2             | 3.2861           | K.AGADGGTPTDR.Y                   | 4            | CS007_HUMAN          |
| Q9UPT8                                                                                  | 2             | 2.7731           | R.AATAGPPNAR.Q                    | 1            | CS007_HUMAN          |
| Q9UPT8                                                                                  | 2             | 3.4787           | R.EGEQDAASLKDVFK.G                | 1            | CS007_HUMAN          |
| <b><i>Zinc finger CCCH type antiviral protein 1 - Homo sapiens (Human)</i></b>          |               |                  |                                   |              |                      |
| Q7Z2W4                                                                                  | 2             | 3.5655           | R.ASLEDAPVDDLTR.K                 | 4            | ZCC2_HUMAN           |
| Q7Z2W4                                                                                  | 2             | 3.9401           | R.SSLGSLQTPEAVTTR.K               | 2            | ZCC2_HUMAN           |
| Q7Z2W4                                                                                  | 2             | 2.7347           | R.FFQGSQEFLASASASAER.S            | 1            | ZCC2_HUMAN           |
| Q7Z2W4                                                                                  | 2             | 3.5893           | K.SLTSWTNDQGAR.R                  | 5            | ZCC2_HUMAN           |
| Q7Z2W4                                                                                  | 2             | 5.2311           | K.ATDLGGTSQAGTSQR.F               | 5            | ZCC2_HUMAN           |
| Q7Z2W4                                                                                  | 3             | 4.3261           | R.FLENGSQEDLLHGNGPSTYLASNSTSAPNW  | 1            | ZCC2_HUMAN           |
| <b><i>Zinc finger CCHC domain-containing protein 6 - Homo sapiens (Human)</i></b>       |               |                  |                                   |              |                      |
| Q5VYS8                                                                                  | 1             | 2.4946           | R.YPENKEK.R                       | 1            | ZCHC6_HUMAN          |
| <b><i>Zinc finger FYVE domain-containing protein 16 - Homo sapiens (Human)</i></b>      |               |                  |                                   |              |                      |
| Q7Z3T8                                                                                  | 3             | 7.6449           | K.DVGLVKEEVDVAVITAAECLKEEGK.T     | 3            | ZFY16_HUMAN          |
| Q7Z3T8                                                                                  | 2             | 2.8466           | K.GLTSIQNEK.N                     | 1            | ZFY16_HUMAN          |
| Q7Z3T8                                                                                  | 2             | 3.4528           | R.EQQNDTSSSELQNR.E                | 2            | ZFY16_HUMAN          |
| <b><i>Zinc finger homeobox protein 4 - Homo sapiens (Human)</i></b>                     |               |                  |                                   |              |                      |

| <i>Accession No*</i>                                                   | <i>Charge</i> | <i>XC(Max)**</i> | <i>Peptide*</i>                    | <i>TC***</i> | <i>Reference No*</i> |
|------------------------------------------------------------------------|---------------|------------------|------------------------------------|--------------|----------------------|
| Q86UP3                                                                 | 2             | 2.8626           | K.DYLAPTTVRQLMAQQELDRIK.K          | 1            | ZFHx4_HUMAN          |
| <b><i>Zinc finger matrin-type protein 2 - Homo sapiens (Human)</i></b> |               |                  |                                    |              |                      |
| Q96NC0                                                                 | 1             | 2.226            | R.STLDQVK.K                        | 1            | ZMAT2_HUMAN          |
| Q96NC0                                                                 | 2             | 3.1058           | R.STLDQVKK.R                       | 1            | ZMAT2_HUMAN          |
| <b><i>Zinc finger protein 148 - Homo sapiens (Human)</i></b>           |               |                  |                                    |              |                      |
| Q9UQR1                                                                 | 2             | 2.8795           | K.FLQQALDR.T                       | 1            | ZN148_HUMAN          |
| <b><i>Zinc finger protein 161 homolog - Homo sapiens (Human)</i></b>   |               |                  |                                    |              |                      |
| O43829                                                                 | 2             | 2.9223           | R.DVSSPDENNGQSK.S                  | 1            | ZF161_HUMAN          |
| <b><i>Zinc finger protein 185 - Homo sapiens (Human)</i></b>           |               |                  |                                    |              |                      |
| A4FTV3                                                                 | 2             | 3.7406           | K.STGPTQETQAPPIAK.R                | 2            | A4FTV3_HUMAN         |
| O15231                                                                 | 2             | 4.4248           | K.STGPTQETQAPPIAK.R                | 4            | ZN185_HUMAN          |
| A4FTV3                                                                 | 3             | 4.0673           | R.DLAGEEAFRAPNTDAAR.S              | 1            | A4FTV3_HUMAN         |
| A4FTV3                                                                 | 2             | 3.0621           | R.GSSSATSVSAPVADR.K                | 2            | A4FTV3_HUMAN         |
| A4FTV3                                                                 | 2             | 3.1893           | R.GSSSATSVSAPVADR.K                | 2            | A4FTV3_HUMAN         |
| A4FTV3                                                                 | 2             | 4.3176           | R.GVFTKPIDSSSQPQQQFPK.A            | 2            | A4FTV3_HUMAN         |
| A4FTV3                                                                 | 3             | 5.0417           | R.SSAQLSDGNVGSATGSRPEGLAAVDIGSER   | 1            | A4FTV3_HUMAN         |
| A4FTV3                                                                 | 2             | 4.3765           | R.TANAGPPRPSSSGYK.M                | 2            | A4FTV3_HUMAN         |
| <b><i>Zinc finger protein 22 - Homo sapiens (Human)</i></b>            |               |                  |                                    |              |                      |
| P17026                                                                 | 2             | 3.591            | K.SFFQSSNLIQHR.R                   | 1            | ZNF22_HUMAN          |
| P17026                                                                 | 2             | 3.807            | K.SFSQSSTLFQHQB.I                  | 2            | ZNF22_HUMAN          |
| <b><i>Zinc finger protein 318 - Homo sapiens (Human)</i></b>           |               |                  |                                    |              |                      |
| Q5VUA4                                                                 | 2             | 3.0936           | R.GSIPAAQVPVQVSIPLIR.Y             | 1            | ZN318_HUMAN          |
| <b><i>Zinc finger protein 330 - Homo sapiens (Human)</i></b>           |               |                  |                                    |              |                      |
| Q9Y3S2                                                                 | 2             | 3.3118           | R.QTGGEEDGASGYDAYWK.N              | 1            | ZN330_HUMAN          |
| Q9Y3S2                                                                 | 2             | 3.276            | R.TYASGYAHYEEQEN.-                 | 3            | ZN330_HUMAN          |
| <b><i>Zinc finger protein 346 - Homo sapiens (Human)</i></b>           |               |                  |                                    |              |                      |
| Q9UL40                                                                 | 2             | 3.6913           | K.TVASSLGQIPM#QR.Q                 | 2            | ZN346_HUMAN          |
| Q9UL40                                                                 | 2             | 3.8403           | K.TVASSLGQIPMQR.Q                  | 3            | ZN346_HUMAN          |
| Q9UL40                                                                 | 2             | 3.3617           | R.LADPAVTDFPAGK.G                  | 2            | ZN346_HUMAN          |
| <b><i>Zinc finger protein 37 homolog - Homo sapiens (Human)</i></b>    |               |                  |                                    |              |                      |
| A0AVJ9                                                                 | 2             | 3.3481           | K.DDDQLENIQK.S                     | 2            | A0AVJ9_HUMAN         |
| <b><i>Zinc finger protein 395 - Homo sapiens (Human)</i></b>           |               |                  |                                    |              |                      |
| Q9H8N7                                                                 | 3             | 5.5216           | K.YLGDAFGSPQTDHGFETDPDPFLLDEPAPR.K | 1            | ZN395_HUMAN          |
| <b><i>Zinc finger protein 428 - Homo sapiens (Human)</i></b>           |               |                  |                                    |              |                      |
| Q96B54                                                                 | 2             | 3.3538           | R.SPLGEAPPGTTPPCR.L                | 1            | Q96B54_HUMAN         |



| <i>Accession No*</i>                                          | <i>Charge</i> | <i>XC(Max)**</i> | <i>Peptide*</i>                  | <i>TC***</i> | <i>Reference No*</i> |
|---------------------------------------------------------------|---------------|------------------|----------------------------------|--------------|----------------------|
| Q96B54                                                        | 2             | 3.0395           | R.ALGEEEEPPR.A                   | 2            | Q96B54_HUMAN         |
| <b><i>Zinc finger protein 512B - Homo sapiens (Human)</i></b> |               |                  |                                  |              |                      |
| Q96KM6                                                        | 3             | 3.7727           | K.KQEGPGPEDARK.K                 | 1            | Z512B_HUMAN          |
| <b><i>Zinc finger protein 513 - Homo sapiens (Human)</i></b>  |               |                  |                                  |              |                      |
| Q86UZ3                                                        | 3             | 4.3368           | R.DSEGDSL GARPGLPYGLSDDES GGGR.A | 2            | Q86UZ3_HUMA          |
| <b><i>Zinc finger protein 518 - Homo sapiens (Human)</i></b>  |               |                  |                                  |              |                      |
| Q6AHZ1                                                        | 2             | 2.7989           | K.C*VM#PNKTELLKPK.L              | 1            | ZN518_HUMAN          |
| <b><i>Zinc finger protein 581 - Homo sapiens (Human)</i></b>  |               |                  |                                  |              |                      |
| Q9P0T4                                                        | 2             | 3.269            | R.DAGELAQHSR.V                   | 2            | ZN581_HUMAN          |
| <b><i>Zinc finger protein 598 - Homo sapiens (Human)</i></b>  |               |                  |                                  |              |                      |
| Q86UK7                                                        | 3             | 3.9675           | K.KVAQPPLSAQATGSGQPTR.K          | 1            | ZN598_HUMAN          |
| Q86UK7                                                        | 2             | 3.8848           | R.ASVAAQQQEEAR.R                 | 4            | ZN598_HUMAN          |
| Q86UK7                                                        | 3             | 3.9837           | R.RSEDQEEGGRPK.K                 | 2            | ZN598_HUMAN          |
| <b><i>Zinc finger protein 616 - Homo sapiens (Human)</i></b>  |               |                  |                                  |              |                      |
| Q08AN1                                                        | 2             | 2.8507           | R.LAELQKVQTEGRLYEENETEK.T        | 1            | ZN616_HUMAN          |
| <b><i>Zinc finger protein 622 - Homo sapiens (Human)</i></b>  |               |                  |                                  |              |                      |
| Q969S3                                                        | 3             | 4.4025           | K.GLGVDSVDK DAMNAAIQQAIA.A       | 1            | ZN622_HUMAN          |
| Q969S3                                                        | 3             | 5.1723           | K.KFASFNAYENHLK.S                | 1            | ZN622_HUMAN          |
| <b><i>Zinc finger protein 638 - Homo sapiens (Human)</i></b>  |               |                  |                                  |              |                      |
| Q14966                                                        | 2             | 4.0359           | K.AILQLDSPESAQSMYSFLK.Q          | 2            | ZN638_HUMAN          |
| Q14966                                                        | 2             | 2.9636           | R.RLPNLPQSR.N                    | 1            | ZN638_HUMAN          |
| Q14966                                                        | 2             | 3.5081           | K.YGYTEDPLEVR.I                  | 2            | ZN638_HUMAN          |
| Q14966                                                        | 3             | 4.4732           | K.TKLESLSQVGPVNENVM EEDLK.T      | 1            | ZN638_HUMAN          |
| Q14966                                                        | 2             | 3.0088           | K.QSSVTQVTEQSPK.V                | 2            | ZN638_HUMAN          |
| Q14966                                                        | 3             | 6.2584           | K.AVVTEPAKGEEAFQMSEVDEESGLKDSEPE | 2            | ZN638_HUMAN          |
| Q14966                                                        | 2             | 2.9284           | K.NYQSQADIPIR.S                  | 2            | ZN638_HUMAN          |
| <b><i>Zinc finger protein 691 - Homo sapiens (Human)</i></b>  |               |                  |                                  |              |                      |
| Q5VV50                                                        | 2             | 2.9535           | K.THLGEQAGKDSS.-                 | 2            | Q5VV50_HUMA          |
| <b><i>Zinc finger protein 703 - Homo sapiens (Human)</i></b>  |               |                  |                                  |              |                      |
| Q9H7S9                                                        | 2             | 3.8035           | K.DSGSSSVSTSSSSSSSPGDK.A         | 1            | ZN703_HUMAN          |
| <b><i>Zinc finger protein 717 - Homo sapiens (Human)</i></b>  |               |                  |                                  |              |                      |
| Q9BY31                                                        | 2             | 2.7184           | R.NHTLLYIRTR.A                   | 1            | Q9BY31_HUMA          |
| <b><i>Zinc finger protein 781 - Homo sapiens (Human)</i></b>  |               |                  |                                  |              |                      |
| Q8N8C0                                                        | 2             | 2.9384           | R.NLMNVRNVKR.L                   | 2            | ZN781_HUMAN          |
| <b><i>Zinc finger protein 787 - Homo sapiens (Human)</i></b>  |               |                  |                                  |              |                      |

| <i>Accession No*</i>                                                                     | <i>Charge</i> | <i>XC(Max)**</i> | <i>Peptide*</i>                 | <i>TC***</i> | <i>Reference No*</i> |
|------------------------------------------------------------------------------------------|---------------|------------------|---------------------------------|--------------|----------------------|
| Q6DD87                                                                                   | 2             | 2.9672           | R.LHPELSGPGVAAK.V               | 2            | ZN787_HUMAN          |
| Q6DD87                                                                                   | 2             | 3.8015           | R.AGGEEDDDDEAAGGR.C             | 4            | ZN787_HUMAN          |
| Q6DD87                                                                                   | 2             | 3.8559           | K.TFSQSSHLVQHR.R                | 1            | ZN787_HUMAN          |
| Q6DD87                                                                                   | 2             | 3.9974           | K.GFGHGAGLLAHQR.A               | 2            | ZN787_HUMAN          |
| <b><i>Zinc finger protein 8 - Homo sapiens (Human)</i></b>                               |               |                  |                                 |              |                      |
| P17098                                                                                   | 2             | 2.7443           | R.DSSQAIPITELTK.S               | 1            | ZNF8_HUMAN           |
| <b><i>Zinc finger protein 91 homolog - Homo sapiens (Human)</i></b>                      |               |                  |                                 |              |                      |
| Q96JP5                                                                                   | 3             | 5.4619           | K.AAPEEPQQRPEAVAAAPAGTTSSR.V    | 5            | ZFP91_HUMAN          |
| <b><i>Zinc finger protein KIAA1802 - Homo sapiens (Human)</i></b>                        |               |                  |                                 |              |                      |
| Q96JM3                                                                                   | 2             | 3.3803           | K.MDM#TSPEQSR.N                 | 2            | K1802_HUMAN          |
| Q96JM3                                                                                   | 3             | 4.4253           | K.SSFFIEPQKPVFPETR.K            | 4            | K1802_HUMAN          |
| Q96JM3                                                                                   | 2             | 2.9918           | R.KPGPSGSPSEPK.A                | 2            | K1802_HUMAN          |
| <b><i>Zinc finger protein ubi-d4 - Homo sapiens (Human)</i></b>                          |               |                  |                                 |              |                      |
| Q92785                                                                                   | 2             | 4.2635           | R.GPGLASGQLYSYPAR.R             | 1            | REQU_HUMAN           |
| Q92785                                                                                   | 3             | 3.8596           | R.GAPDPRVDDDSLGEFPVTNSR.A       | 1            | REQU_HUMAN           |
| <b><i>Zinc finger protein with KRAB and SCAN domains 1 - Homo sapiens (Human)</i></b>    |               |                  |                                 |              |                      |
| P17029                                                                                   | 2             | 3.0863           | R.SFSLSSNFTTPEEVPTGTK.S         | 1            | ZKSC1_HUMAN          |
| <b><i>Zinc finger Ran-binding domain-containing protein 2 - Homo sapiens (Human)</i></b> |               |                  |                                 |              |                      |
| O95218                                                                                   | 2             | 2.8916           | R.TGYGGGFNER.E                  | 2            | ZRAB2_HUMAN          |
| O95218                                                                                   | 1             | 2.1925           | K.AVGPASILK.E                   | 1            | ZRAB2_HUMAN          |
| <b><i>Zinc finger RNA-binding protein - Homo sapiens (Human)</i></b>                     |               |                  |                                 |              |                      |
| Q96KR1                                                                                   | 2             | 4.6102           | K.GLTTTGNSSLNSTSNTK.V           | 2            | Q96KR1_HUMA          |
| <b><i>Zinc transporter ZIP10 precursor - Homo sapiens (Human)</i></b>                    |               |                  |                                 |              |                      |
| Q9ULF5                                                                                   | 2             | 2.9417           | K.LLTNLGLGER.K                  | 1            | ZIP10_HUMAN          |
| <b><i>Zyxin - Homo sapiens (Human)</i></b>                                               |               |                  |                                 |              |                      |
| Q15942                                                                                   | 2             | 5.4847           | R.PSPAISVSVSAPAFYAPQKK.F        | 3            | ZYX_HUMAN            |
| Q15942                                                                                   | 2             | 3.6513           | K.FGPVVAPKPK.V                  | 5            | ZYX_HUMAN            |
| Q15942                                                                                   | 2             | 3.7649           | K.VNPFRRPGDSEPPAPGAQR.A         | 4            | ZYX_HUMAN            |
| Q15942                                                                                   | 3             | 4.8796           | R.EKVSSIDLEISLSSLLDDM#TKNDPFK.A | 1            | ZYX_HUMAN            |
| Q15942                                                                                   | 2             | 4.1548           | R.PSPAISVSVSAPAFYAPQK.K         | 4            | ZYX_HUMAN            |
