# Supplementary material
Source: PubMed Central journal article supplement (PMC3251958)
Supplement: NIHMS175878-supplement-4_si_004.pdf [file NIHMS175878-supplement-4_si_004.pdf]

## Table S-1b

**A list of 1,275 proteins identified in tumor by at least 2 protein-specific peptides, sorted by protein name.**

*\*MS/MS spectra were searched against the UniProt Human proteomic database; release 09/07.*

| <i>Accession No*</i> | <i>Protein Name*</i>                                                           | <i>Reference No*</i> |
|----------------------|--------------------------------------------------------------------------------|----------------------|
| P61604               | 10 kDa heat shock protein, mitochondrial - Homo sapiens (Human)                | CH10_HUMAN           |
| Q9ULH1               | 130 kDa phosphatidylinositol 4,5-biphosphate-dependent ARF1 GTPase-activating  | DDEF1_HUMAN          |
| Q9NRX4               | 14 kDa phosphohistidine phosphatase - Homo sapiens (Human)                     | PHP14_HUMAN          |
| P62258               | 14-3-3 protein epsilon - Homo sapiens (Human)                                  | 1433E_HUMAN          |
| P31947               | 14-3-3 protein sigma - Homo sapiens (Human)                                    | 1433S_HUMAN          |
| P63104               | 14-3-3 protein zeta/delta - Homo sapiens (Human)                               | 1433Z_HUMAN          |
| Q9C0C2               | 182 kDa tankyrase 1-binding protein - Homo sapiens (Human)                     | TB182_HUMAN          |
| O00233               | 26S proteasome non-ATPase regulatory subunit 9 - Homo sapiens (Human)          | PSMD9_HUMAN          |
| Q13442               | 28 kDa heat- and acid-stable phosphoprotein - Homo sapiens (Human)             | HAP28_HUMAN          |
| Q92665               | 28S ribosomal protein S31, mitochondrial precursor - Homo sapiens (Human)      | RT31_HUMAN           |
| P52815               | 39S ribosomal protein L12, mitochondrial precursor - Homo sapiens (Human)      | RM12_HUMAN           |
| Q86TS9               | 39S ribosomal protein L52, mitochondrial precursor - Homo sapiens (Human)      | RM52_HUMAN           |
| P31937               | 3-hydroxyisobutyrate dehydrogenase, mitochondrial precursor - Homo sapiens (Hu | 3HIDH_HUMAN          |
| Q9H1C6               | 4.1G protein - Homo sapiens (Human)                                            | Q9H1C6_HUMAN         |
| P62280               | 40S ribosomal protein S11 - Homo sapiens (Human)                               | RS11_HUMAN           |
| P62277               | 40S ribosomal protein S13 - Homo sapiens (Human)                               | RS13_HUMAN           |
| P62263               | 40S ribosomal protein S14 - Homo sapiens (Human)                               | RS14_HUMAN           |
| P08708               | 40S ribosomal protein S17 - Homo sapiens (Human)                               | RS17_HUMAN           |
| P62269               | 40S ribosomal protein S18 - Homo sapiens (Human)                               | RS18_HUMAN           |
| P39019               | 40S ribosomal protein S19 - Homo sapiens (Human)                               | RS19_HUMAN           |
| P15880               | 40S ribosomal protein S2 - Homo sapiens (Human)                                | RS2_HUMAN            |
| P60866               | 40S ribosomal protein S20 - Homo sapiens (Human)                               | RS20_HUMAN           |
| P63220               | 40S ribosomal protein S21 - Homo sapiens (Human)                               | RS21_HUMAN           |
| P62266               | 40S ribosomal protein S23 - Homo sapiens (Human)                               | RS23_HUMAN           |
| P62847               | 40S ribosomal protein S24 - Homo sapiens (Human)                               | RS24_HUMAN           |
| P62851               | 40S ribosomal protein S25 - Homo sapiens (Human)                               | RS25_HUMAN           |
| P62857               | 40S ribosomal protein S28 - Homo sapiens (Human)                               | RS28_HUMAN           |
| P23396               | 40S ribosomal protein S3 - Homo sapiens (Human)                                | RS3_HUMAN            |
| P62861               | 40S ribosomal protein S30 - Homo sapiens (Human)                               | RS30_HUMAN           |
| P61247               | 40S ribosomal protein S3a - Homo sapiens (Human)                               | RS3A_HUMAN           |

| <i>Accession No*</i> | <i>Protein Name*</i>                                   | <i>Reference No*</i> |
|----------------------|--------------------------------------------------------|----------------------|
| P62081               | 40S ribosomal protein S7 - Homo sapiens (Human)        | RS7_HUMAN            |
| P46781               | 40S ribosomal protein S9 - Homo sapiens (Human)        | RS9_HUMAN            |
| Q9H0D6               | 5'-3' exoribonuclease 2 - Homo sapiens (Human)         | XRN2_HUMAN           |
| Q9UPN4               | 5-azacytidine-induced protein 1 - Homo sapiens (Human) | AZI1_HUMAN           |
| P05387               | 60S acidic ribosomal protein P2 - Homo sapiens (Human) | RLA2_HUMAN           |
| P62913               | 60S ribosomal protein L11 - Homo sapiens (Human)       | RL11_HUMAN           |
| P26373               | 60S ribosomal protein L13 - Homo sapiens (Human)       | RL13_HUMAN           |
| P18621               | 60S ribosomal protein L17 - Homo sapiens (Human)       | RL17_HUMAN           |
| Q07020               | 60S ribosomal protein L18 - Homo sapiens (Human)       | RL18_HUMAN           |
| P84098               | 60S ribosomal protein L19 - Homo sapiens (Human)       | RL19_HUMAN           |
| P35268               | 60S ribosomal protein L22 - Homo sapiens (Human)       | RL22_HUMAN           |
| P62829               | 60S ribosomal protein L23 - Homo sapiens (Human)       | RL23_HUMAN           |
| P62750               | 60S ribosomal protein L23a - Homo sapiens (Human)      | RL23A_HUMAN          |
| P83731               | 60S ribosomal protein L24 - Homo sapiens (Human)       | RL24_HUMAN           |
| P61254               | 60S ribosomal protein L26 - Homo sapiens (Human)       | RL26_HUMAN           |
| P46776               | 60S ribosomal protein L27a - Homo sapiens (Human)      | RL27A_HUMAN          |
| P47914               | 60S ribosomal protein L29 - Homo sapiens (Human)       | RL29_HUMAN           |
| P62899               | 60S ribosomal protein L31 - Homo sapiens (Human)       | RL31_HUMAN           |
| P49207               | 60S ribosomal protein L34 - Homo sapiens (Human)       | RL34_HUMAN           |
| P42766               | 60S ribosomal protein L35 - Homo sapiens (Human)       | RL35_HUMAN           |
| Q9Y3U8               | 60S ribosomal protein L36 - Homo sapiens (Human)       | RL36_HUMAN           |
| P83881               | 60S ribosomal protein L36a - Homo sapiens (Human)      | RL36A_HUMAN          |
| Q969Q0               | 60S ribosomal protein L36a-like - Homo sapiens (Human) | RL36L_HUMAN          |
| P61513               | 60S ribosomal protein L37a - Homo sapiens (Human)      | RL37A_HUMAN          |
| P63173               | 60S ribosomal protein L38 - Homo sapiens (Human)       | RL38_HUMAN           |
| P36578               | 60S ribosomal protein L4 - Homo sapiens (Human)        | RL4_HUMAN            |
| P46777               | 60S ribosomal protein L5 - Homo sapiens (Human)        | RL5_HUMAN            |
| P62917               | 60S ribosomal protein L8 - Homo sapiens (Human)        | RL8_HUMAN            |
| P32969               | 60S ribosomal protein L9 - Homo sapiens (Human)        | RL9_HUMAN            |
| Q5T721               | A kinase - Homo sapiens (Human)                        | Q5T721_HUMAN         |
| Q9P2A4               | ABI gene family member 3 - Homo sapiens (Human)        | ABI3_HUMAN           |
| Q8IZP0               | Abl interactor 1 - Homo sapiens (Human)                | ABI1_HUMAN           |
| Q9NYB9               | Abl interactor 2 - Homo sapiens (Human)                | ABI2_HUMAN           |

| <i>Accession No*</i> | <i>Protein Name*</i>                                                             | <i>Reference No*</i> |
|----------------------|----------------------------------------------------------------------------------|----------------------|
| Q9Y4K1               | Absent in melanoma 1 protein - Homo sapiens (Human)                              | AIM1_HUMAN           |
| P39687               | Acidic leucine-rich nuclear phosphoprotein 32 family member A - Homo sapiens (Hu | AN32A_HUMAN          |
| Q92688               | Acidic leucine-rich nuclear phosphoprotein 32 family member B - Homo sapiens (Hu | AN32B_HUMAN          |
| Q8N4X5               | Actin filament-associated protein 1-like 2 - Homo sapiens (Human)                | AF1L2_HUMAN          |
| Q765P7               | Actin-bundling protein with BAIAP2 homology - Homo sapiens (Human)               | Q765P7_HUMAN         |
| O15143               | Actin-related protein 2/3 complex subunit 1B - Homo sapiens (Human)              | ARC1B_HUMAN          |
| O15145               | Actin-related protein 2/3 complex subunit 3 - Homo sapiens (Human)               | ARPC3_HUMAN          |
| P53999               | Activated RNA polymerase II transcriptional coactivator p15 - Homo sapiens (Huma | TCP4_HUMAN           |
| Q9H2P0               | Activity-dependent neuroprotector - Homo sapiens (Human)                         | ADNP_HUMAN           |
| O14561               | Acyl carrier protein, mitochondrial precursor - Homo sapiens (Human)             | ACPM_HUMAN           |
| A1X283               | Adaptor protein HOF1 - Homo sapiens (Human)                                      | A1X283_HUMAN         |
| P25054               | Adenomatous polyposis coli protein - Homo sapiens (Human)                        | APC_HUMAN            |
| P54819               | Adenylate kinase isoenzyme 2, mitochondrial - Homo sapiens (Human)               | KAD2_HUMAN           |
| Q8N142               | Adenylosuccinate synthetase isozyme 1 - Homo sapiens (Human)                     | PURA1_HUMAN          |
| Q99541               | Adipophilin - Homo sapiens (Human)                                               | ADFP_HUMAN           |
| Q15847               | Adipose most abundant gene transcript 2 - Homo sapiens (Human)                   | APM2_HUMAN           |
| Q9BW91               | ADP-ribose pyrophosphatase, mitochondrial precursor - Homo sapiens (Human)       | NUDT9_HUMAN          |
| Q9NP61               | ADP-ribosylation factor GTPase-activating protein 3 - Homo sapiens (Human)       | ARFG3_HUMAN          |
| P10109               | Adrenodoxin, mitochondrial precursor - Homo sapiens (Human)                      | ADX_HUMAN            |
| Q9UHB7               | AF4/FMR2 family member 4 - Homo sapiens (Human)                                  | AFF4_HUMAN           |
| P55196               | Afadin - Homo sapiens (Human)                                                    | AFAD_HUMAN           |
| Q6ULP2               | Aftiphilin - Homo sapiens (Human)                                                | AFTIN_HUMAN          |
| P16112               | Aggrecan core protein precursor - Homo sapiens (Human)                           | PGCA_HUMAN           |
| O00468               | Agrin precursor - Homo sapiens (Human)                                           | AGRIN_HUMAN          |
| Q9BVU3               | AHNAK protein - Homo sapiens (Human)                                             | Q9BVU3_HUMAN         |
| Q5BKX7               | AHNAK2 protein - Homo sapiens (Human)                                            | Q5BKX7_HUMAN         |
| Q12802               | A-kinase anchor protein 13 - Homo sapiens (Human)                                | AKP13_HUMAN          |
| P02763               | Alpha-1-acid glycoprotein 1 precursor - Homo sapiens (Human)                     | A1AG1_HUMAN          |
| P19652               | Alpha-1-acid glycoprotein 2 precursor - Homo sapiens (Human)                     | A1AG2_HUMAN          |
| P01011               | Alpha-1-antichymotrypsin precursor - Homo sapiens (Human)                        | AACT_HUMAN           |
| P01009               | Alpha-1-antitrypsin precursor - Homo sapiens (Human)                             | A1AT_HUMAN           |
| Q5XKQ4               | Alpha-2-glycoprotein 1, zinc-binding - Homo sapiens (Human)                      | Q5XKQ4_HUMAN         |
| P02765               | Alpha-2-HS-glycoprotein precursor - Homo sapiens (Human)                         | FETUA_HUMAN          |

| <i>Accession No*</i> | <i>Protein Name*</i>                                                                | <i>Reference No*</i> |
|----------------------|-------------------------------------------------------------------------------------|----------------------|
| P01023               | Alpha-2-macroglobulin precursor - Homo sapiens (Human)                              | A2MG_HUMAN           |
| P30533               | Alpha-2-macroglobulin receptor-associated protein precursor - Homo sapiens (Hum     | AMRP_HUMAN           |
| P02511               | Alpha-crystallin B chain - Homo sapiens (Human)                                     | CRYAB_HUMAN          |
| P06733               | Alpha-enolase - Homo sapiens (Human)                                                | ENOA_HUMAN           |
| Q9NZD4               | Alpha-hemoglobin-stabilizing protein - Homo sapiens (Human)                         | AHSP_HUMAN           |
| Q86TB3               | Alpha-protein kinase 2 - Homo sapiens (Human)                                       | ALPK2_HUMAN          |
| P37840               | Alpha-synuclein - Homo sapiens (Human)                                              | SYUA_HUMAN           |
| P40222               | Alpha-taxilin - Homo sapiens (Human)                                                | TXLNA_HUMAN          |
| P02760               | AMBP protein precursor [Contains: Alpha-1-microglobulin - Homo sapiens (Human)      | AMBP_HUMAN           |
| Q7Z5R6               | Amyloid beta A4 precursor protein-binding family B member 1-interacting protein - H | AB1IP_HUMAN          |
| Q92870               | Amyloid beta A4 precursor protein-binding family B member 2 - Homo sapiens (Hu      | APBB2_HUMAN          |
| P05067               | Amyloid beta A4 protein precursor - Homo sapiens (Human)                            | A4_HUMAN             |
| Q8NHZ8               | Anaphase-promoting complex subunit CDC26 - Homo sapiens (Human)                     | CDC26_HUMAN          |
| Q9Y2J4               | Angiomotin-like protein 2 - Homo sapiens (Human)                                    | AMOL2_HUMAN          |
| Q92625               | Ankyrin repeat and SAM domain-containing protein 1A - Homo sapiens (Human)          | ANKS1_HUMAN          |
| Q6NY19               | Ankyrin repeat domain-containing protein 47 - Homo sapiens (Human)                  | ANR47_HUMAN          |
| P16157               | Ankyrin-1 - Homo sapiens (Human)                                                    | ANK1_HUMAN           |
| P04083               | Annexin A1 - Homo sapiens (Human)                                                   | ANXA1_HUMAN          |
| P08758               | Annexin A5 - Homo sapiens (Human)                                                   | ANXA5_HUMAN          |
| Q9UMZ2               | AP1 subunit gamma-binding protein 1 - Homo sapiens (Human)                          | SYNG_HUMAN           |
| Q2M2I8               | AP2-associated protein kinase 1 - Homo sapiens (Human)                              | AAK1_HUMAN           |
| O14617               | AP-3 complex subunit delta-1 - Homo sapiens (Human)                                 | AP3D1_HUMAN          |
| P02647               | Apolipoprotein A-I precursor - Homo sapiens (Human)                                 | APOA1_HUMAN          |
| P02652               | Apolipoprotein A-II precursor - Homo sapiens (Human)                                | APOA2_HUMAN          |
| P06727               | Apolipoprotein A-IV precursor - Homo sapiens (Human)                                | APOA4_HUMAN          |
| Q0VD83               | Apolipoprotein B48 receptor - Homo sapiens (Human)                                  | Q0VD83_HUMAN         |
| P02656               | Apolipoprotein C-III precursor - Homo sapiens (Human)                               | APOC3_HUMAN          |
| P02649               | Apolipoprotein E precursor - Homo sapiens (Human)                                   | APOE_HUMAN           |
| Q9BZZ5               | Apoptosis inhibitor 5 - Homo sapiens (Human)                                        | API5_HUMAN           |
| Q9ULZ3               | Apoptosis-associated speck-like protein containing a CARD - Homo sapiens (Huma      | ASC_HUMAN            |
| Q13625               | Apoptosis-stimulating of p53 protein 2 - Homo sapiens (Human)                       | ASPP2_HUMAN          |
| Q9UKV3               | Apoptotic chromatin condensation inducer in the nucleus - Homo sapiens (Human)      | ACINU_HUMAN          |
| P53367               | Arfaptin-1 - Homo sapiens (Human)                                                   | ARFP1_HUMAN          |

| <i>Accession No*</i> | <i>Protein Name*</i>                                                               | <i>Reference No*</i> |
|----------------------|------------------------------------------------------------------------------------|----------------------|
| Q05BE8               | ARHGAP5 protein - Homo sapiens (Human)                                             | Q05BE8_HUMAN         |
| O00192               | Armadillo repeat protein deleted in velo-cardio-facial syndrome - Homo sapiens (Hu | ARVC_HUMAN           |
| Q9BVC5               | Ashwin - Homo sapiens (Human)                                                      | ASHWN_HUMAN          |
| Q7L266               | Asparaginase-like protein 1 - Homo sapiens (Human)                                 | Q7L266_HUMAN         |
| Q5TGY3               | AT hook DNA-binding motif-containing protein 1 - Homo sapiens (Human)              | Q5TGY3_HUMAN         |
| Q8WWM7               | Ataxin-2-like protein - Homo sapiens (Human)                                       | ATX2L_HUMAN          |
| Q8WYP5               | AT-hook-containing transcription factor 1 - Homo sapiens (Human)                   | AHTF1_HUMAN          |
| O75947               | ATP synthase D chain, mitochondrial - Homo sapiens (Human)                         | ATP5H_HUMAN          |
| P30049               | ATP synthase delta chain, mitochondrial precursor - Homo sapiens (Human)           | ATPD_HUMAN           |
| P56385               | ATP synthase e chain, mitochondrial - Homo sapiens (Human)                         | ATP5I_HUMAN          |
| P25705               | ATP synthase subunit alpha, mitochondrial precursor - Homo sapiens (Human)         | ATPA_HUMAN           |
| P06576               | ATP synthase subunit beta, mitochondrial precursor - Homo sapiens (Human)          | ATPB_HUMAN           |
| P18859               | ATP synthase-coupling factor 6, mitochondrial precursor - Homo sapiens (Human)     | ATP5J_HUMAN          |
| Q9NUQ8               | ATP-binding cassette sub-family F member 3 - Homo sapiens (Human)                  | ABCF3_HUMAN          |
| P12956               | ATP-dependent DNA helicase 2 subunit 1 - Homo sapiens (Human)                      | KU70_HUMAN           |
| P46063               | ATP-dependent DNA helicase Q1 - Homo sapiens (Human)                               | RECQ1_HUMAN          |
| Q86XP3               | ATP-dependent RNA helicase DDX42 - Homo sapiens (Human)                            | DDX42_HUMAN          |
| O14497               | AT-rich interactive domain-containing protein 1A - Homo sapiens (Human)            | ARI1A_HUMAN          |
| Q8NFD5               | AT-rich interactive domain-containing protein 1B - Homo sapiens (Human)            | ARI1B_HUMAN          |
| O95817               | BAG family molecular chaperone regulator 3 - Homo sapiens (Human)                  | BAG3_HUMAN           |
| O95429               | BAG family molecular chaperone regulator 4 - Homo sapiens (Human)                  | BAG4_HUMAN           |
| Q9H4G0               | Band 4.1-like protein 1 - Homo sapiens (Human)                                     | E41L1_HUMAN          |
| Q9Y2J2               | Band 4.1-like protein 3 - Homo sapiens (Human)                                     | E41L3_HUMAN          |
| O75531               | Barrier-to-autointegration factor - Homo sapiens (Human)                           | BAF_HUMAN            |
| P98160               | Basement membrane-specific heparan sulfate proteoglycan core protein precursor -   | PGBM_HUMAN           |
| P35613               | Basigin precursor - Homo sapiens (Human)                                           | BASI_HUMAN           |
| Q4VC05               | B-cell CLL/lymphoma 7 protein family member A - Homo sapiens (Human)               | BCL7A_HUMAN          |
| Q9NYF8               | Bcl-2-associated transcription factor 1 - Homo sapiens (Human)                     | BCLF1_HUMAN          |
| P02749               | Beta-2-glycoprotein 1 precursor - Homo sapiens (Human)                             | APOH_HUMAN           |
| P35612               | Beta-adducin - Homo sapiens (Human)                                                | ADDB_HUMAN           |
| Q9NSA3               | Beta-catenin-interacting protein 1 - Homo sapiens (Human)                          | CNBP1_HUMAN          |
| Q93088               | Betaine--homocysteine S-methyltransferase 1 - Homo sapiens (Human)                 | BHMT1_HUMAN          |
| Q7L2J0               | BIN3 domain-containing protein 1 - Homo sapiens (Human)                            | BN3D1_HUMAN          |

| <i>Accession No*</i> | <i>Protein Name*</i>                                                       | <i>Reference No*</i> |
|----------------------|----------------------------------------------------------------------------|----------------------|
| Q9NSY1               | BMP-2-inducible protein kinase - Homo sapiens (Human)                      | BMP2K_HUMAN          |
| Q9Y3E2               | BolA-like protein 1 - Homo sapiens (Human)                                 | BOLA1_HUMAN          |
| P80723               | Brain acid soluble protein 1 - Homo sapiens (Human)                        | BASP_HUMAN           |
| Q9UBW5               | Bridging integrator 2 - Homo sapiens (Human)                               | BIN2_HUMAN           |
| O60885               | Bromodomain-containing protein 4 - Homo sapiens (Human)                    | BRD4_HUMAN           |
| Q9BRD0               | BUD13 homolog - Homo sapiens (Human)                                       | BUD13_HUMAN          |
| P04003               | C4b-binding protein alpha chain precursor - Homo sapiens (Human)           | C4BP_HUMAN           |
| P20851               | C4b-binding protein beta chain precursor - Homo sapiens (Human)            | C4BB_HUMAN           |
| P55287               | Cadherin-11 precursor - Homo sapiens (Human)                               | CAD11_HUMAN          |
| P55290               | Cadherin-13 precursor - Homo sapiens (Human)                               | CAD13_HUMAN          |
| O75309               | Cadherin-16 precursor - Homo sapiens (Human)                               | CAD16_HUMAN          |
| P19022               | Cadherin-2 precursor - Homo sapiens (Human)                                | CADH2_HUMAN          |
| P33151               | Cadherin-5 precursor - Homo sapiens (Human)                                | CADH5_HUMAN          |
| P55285               | Cadherin-6 precursor - Homo sapiens (Human)                                | CADH6_HUMAN          |
| P05937               | Calbindin - Homo sapiens (Human)                                           | CALB1_HUMAN          |
| Q9Y2V2               | Calcium-regulated heat stable protein 1 - Homo sapiens (Human)             | CHSP1_HUMAN          |
| Q05682               | Caldesmon - Homo sapiens (Human)                                           | CALD1_HUMAN          |
| Q96JQ2               | Calmin - Homo sapiens (Human)                                              | CLMN_HUMAN           |
| P62158               | Calmodulin - Homo sapiens (Human)                                          | CALM_HUMAN           |
| P27482               | Calmodulin-like protein 3 - Homo sapiens (Human)                           | CALL3_HUMAN          |
| Q5T5Y3               | Calmodulin-regulated spectrin-associated protein 1. - Homo sapiens (Human) | Q5T5Y3_HUMAN         |
| P20810               | Calpastatin - Homo sapiens (Human)                                         | ICAL_HUMAN           |
| P51911               | Calponin-1 - Homo sapiens (Human)                                          | CNN1_HUMAN           |
| Q99439               | Calponin-2 - Homo sapiens (Human)                                          | CNN2_HUMAN           |
| Q15417               | Calponin-3 - Homo sapiens (Human)                                          | CNN3_HUMAN           |
| P27797               | Calreticulin precursor - Homo sapiens (Human)                              | CALR_HUMAN           |
| O43852               | Calumenin precursor - Homo sapiens (Human)                                 | CALU_HUMAN           |
| P16220               | cAMP response element-binding protein - Homo sapiens (Human)               | CREB1_HUMAN          |
| P56211               | cAMP-regulated phosphoprotein 19 - Homo sapiens (Human)                    | ARP19_HUMAN          |
| Q9UDT6               | CAP-Gly domain-containing linker protein 2 - Homo sapiens (Human)          | CLIP2_HUMAN          |
| P00915               | Carbonic anhydrase 1 - Homo sapiens (Human)                                | CAH1_HUMAN           |
| P00918               | Carbonic anhydrase 2 - Homo sapiens (Human)                                | CAH2_HUMAN           |
| Q16790               | Carbonic anhydrase 9 precursor - Homo sapiens (Human)                      | CAH9_HUMAN           |

| <i>Accession No*</i> | <i>Protein Name*</i>                                                           | <i>Reference No*</i> |
|----------------------|--------------------------------------------------------------------------------|----------------------|
| P49674               | Casein kinase I isoform epsilon - Homo sapiens (Human)                         | KC1E_HUMAN           |
| Q8WXE0               | Caskin-2 - Homo sapiens (Human)                                                | CSKI2_HUMAN          |
| P04040               | Catalase - Homo sapiens (Human)                                                | CATA_HUMAN           |
| P35221               | Catenin alpha-1 - Homo sapiens (Human)                                         | CTNA1_HUMAN          |
| P07858               | Cathepsin B precursor - Homo sapiens (Human)                                   | CATB_HUMAN           |
| P07339               | Cathepsin D precursor - Homo sapiens (Human)                                   | CATD_HUMAN           |
| P08311               | Cathepsin G precursor - Homo sapiens (Human)                                   | CATG_HUMAN           |
| Q9NZN8               | CCR4-NOT transcription complex subunit 2 - Homo sapiens (Human)                | CNOT2_HUMAN          |
| O95400               | CD2 antigen cytoplasmic tail-binding protein 2 - Homo sapiens (Human)          | CD2B2_HUMAN          |
| Q9Y5K6               | CD2-associated protein - Homo sapiens (Human)                                  | CD2AP_HUMAN          |
| P16070               | CD44 antigen precursor - Homo sapiens (Human)                                  | CD44_HUMAN           |
| P48960               | CD97 antigen precursor - Homo sapiens (Human)                                  | CD97_HUMAN           |
| Q00587               | Cdc42 effector protein 1 - Homo sapiens (Human)                                | BORG5_HUMAN          |
| Q9H3Q1               | Cdc42 effector protein 4 - Homo sapiens (Human)                                | BORG4_HUMAN          |
| Q15642               | Cdc42-interacting protein 4 - Homo sapiens (Human)                             | CIP4_HUMAN           |
| Q9NW82               | CDNA FLJ10233 fis, clone HEMBB1000266 - Homo sapiens (Human)                   | Q9NW82_HUMAN         |
| Q9NXV6               | CDNA FLJ20036 fis, clone COL00219 - Homo sapiens (Human)                       | Q9NXV6_HUMAN         |
| Q96ND2               | CDNA FLJ31051 fis, clone HSYRA2000605, weakly similar to MYOSIN HEAVY CH       | Q96ND2_HUMAN         |
| Q8N9N8               | CDNA FLJ36810 fis, clone ASTRO2001249 - Homo sapiens (Human)                   | Q8N9N8_HUMAN         |
| Q6ZSR9               | CDNA FLJ45252 fis, clone BRHIP2011199 - Homo sapiens (Human)                   | Q6ZSR9_HUMAN         |
| Q6ZSI4               | CDNA FLJ45505 fis, clone BRTHA2020642, weakly similar to DRR1 protein - Homo   | Q6ZSI4_HUMAN         |
| Q6ZQN2               | CDNA FLJ46846 fis, clone UTERU3004635, moderately similar to Neuroblast differ | Q6ZQN2_HUMAN         |
| Q9H6G0               | CDNA: FLJ22312 fis, clone HRC05210. - Homo sapiens (Human)                     | Q9H6G0_HUMAN         |
| Q9H698               | CDNA: FLJ22461 fis, clone HRC10107 - Homo sapiens (Human)                      | Q9H698_HUMAN         |
| Q9BV09               | Cell cycle associated protein 1 - Homo sapiens (Human)                         | Q9BV09_HUMAN         |
| Q9NYV4               | Cell division cycle 2-related protein kinase 7 - Homo sapiens (Human)          | CD2L7_HUMAN          |
| Q99459               | Cell division cycle 5-like protein - Homo sapiens (Human)                      | CDC5L_HUMAN          |
| Q8IX12               | Cell division cycle and apoptosis regulator protein 1 - Homo sapiens (Human)   | CCAR1_HUMAN          |
| Q9NX58               | Cell growth-regulating nucleolar protein - Homo sapiens (Human)                | LYAR_HUMAN           |
| P43121               | Cell surface glycoprotein MUC18 precursor - Homo sapiens (Human)               | MUC18_HUMAN          |
| P41208               | Centrin-2 - Homo sapiens (Human)                                               | CETN2_HUMAN          |
| Q03188               | Centromere protein C 1 - Homo sapiens (Human)                                  | CENPC_HUMAN          |
| Q5SW79               | Centrosomal protein of 170 kDa - Homo sapiens (Human)                          | CE170_HUMAN          |

| <i>Accession No*</i> | <i>Protein Name*</i>                                                           | <i>Reference No*</i> |
|----------------------|--------------------------------------------------------------------------------|----------------------|
| P00450               | Ceruloplasmin precursor - Homo sapiens (Human)                                 | CERU_HUMAN           |
| Q9UFW8               | CGG triplet repeat-binding protein 1 - Homo sapiens (Human)                    | CGBP1_HUMAN          |
| Q14432               | cGMP-inhibited 3',5'-cyclic phosphodiesterase A - Homo sapiens (Human)         | PDE3A_HUMAN          |
| Q9HD42               | Charged multivesicular body protein 1a - Homo sapiens (Human)                  | CHM1A_HUMAN          |
| Q7LBR1               | Charged multivesicular body protein 1b - Homo sapiens (Human)                  | CHM1B_HUMAN          |
| O43633               | Charged multivesicular body protein 2a - Homo sapiens (Human)                  | CHM2A_HUMAN          |
| Q9UQN3               | Charged multivesicular body protein 2b - Homo sapiens (Human)                  | CHM2B_HUMAN          |
| Q9H444               | Charged multivesicular body protein 4b - Homo sapiens (Human)                  | CHM4B_HUMAN          |
| Q9NZZ3               | Charged multivesicular body protein 5 - Homo sapiens (Human)                   | CHMP5_HUMAN          |
| Q96S66               | Chloride channel CLIC-like protein 1 precursor - Homo sapiens (Human)          | CLCC1_HUMAN          |
| Q6UVK1               | Chondroitin sulfate proteoglycan 4 precursor - Homo sapiens (Human)            | CSPG4_HUMAN          |
| Q14D22               | Chromatin modifying protein 4A - Homo sapiens (Human)                          | Q14D22_HUMAN         |
| P83916               | Chromobox protein homolog 1 - Homo sapiens (Human)                             | CBX1_HUMAN           |
| Q13185               | Chromobox protein homolog 3 - Homo sapiens (Human)                             | CBX3_HUMAN           |
| P45973               | Chromobox protein homolog 5 - Homo sapiens (Human)                             | CBX5_HUMAN           |
| Q9Y232               | Chromodomain Y-like protein - Homo sapiens (Human)                             | CDYL1_HUMAN          |
| Q0VF96               | Cingulin-like protein 1 - Homo sapiens (Human)                                 | Q0VF96_HUMAN         |
| O60271               | C-jun-amino-terminal kinase-interacting protein 4 - Homo sapiens (Human)       | JIP4_HUMAN           |
| Q14677               | Clathrin interactor 1 - Homo sapiens (Human)                                   | EPN4_HUMAN           |
| P09496               | Clathrin light chain A - Homo sapiens (Human)                                  | CLCA_HUMAN           |
| P09497               | Clathrin light chain B - Homo sapiens (Human)                                  | CLCB_HUMAN           |
| Q16630               | Cleavage and polyadenylation specificity factor 6 - Homo sapiens (Human)       | CPSF6_HUMAN          |
| Q9H0L4               | Cleavage stimulation factor 64 kDa subunit, tau variant - Homo sapiens (Human) | CSTFT_HUMAN          |
| Q7Z460               | CLIP-associating protein 1 - Homo sapiens (Human)                              | CLAP1_HUMAN          |
| P10909               | Clusterin precursor - Homo sapiens (Human)                                     | CLUS_HUMAN           |
| O43598               | c-Myc-responsive protein Rcl - Homo sapiens (Human)                            | RCL_HUMAN            |
| P23528               | Cofilin-1 - Homo sapiens (Human)                                               | COF1_HUMAN           |
| Q6P1N0               | Coiled-coil and C2 domain-containing protein 1A - Homo sapiens (Human)         | C2D1A_HUMAN          |
| Q96A19               | Coiled-coil domain-containing protein 102A - Homo sapiens (Human)              | C102A_HUMAN          |
| Q96G28               | Coiled-coil domain-containing protein 104 - Homo sapiens (Human)               | CC104_HUMAN          |
| Q96CT7               | Coiled-coil domain-containing protein 124 - Homo sapiens (Human)               | CC124_HUMAN          |
| Q6PK04               | Coiled-coil domain-containing protein 137 - Homo sapiens (Human)               | CC137_HUMAN          |
| Q96NB3               | Coiled-coil domain-containing protein 16 - Homo sapiens (Human)                | CCD16_HUMAN          |



| <i>Accession No*</i> | <i>Protein Name*</i>                                                                | <i>Reference No*</i> |
|----------------------|-------------------------------------------------------------------------------------|----------------------|
| Q8IWP9               | Coiled-coil domain-containing protein 28A - Homo sapiens (Human)                    | CC28A_HUMAN          |
| Q8IVM0               | Coiled-coil domain-containing protein 50 - Homo sapiens (Human)                     | CCD50_HUMAN          |
| Q9Y3C0               | Coiled-coil domain-containing protein 53 - Homo sapiens (Human)                     | CCD53_HUMAN          |
| Q9H0G5               | Coiled-coil domain-containing protein 55 - Homo sapiens (Human)                     | CCD55_HUMAN          |
| Q4VC31               | Coiled-coil domain-containing protein 58 - Homo sapiens (Human)                     | CCD58_HUMAN          |
| Q9Y2S6               | Coiled-coil domain-containing protein 72 - Homo sapiens (Human)                     | CCD72_HUMAN          |
| Q9H6F5               | Coiled-coil domain-containing protein 86 - Homo sapiens (Human)                     | CCD86_HUMAN          |
| Q9Y3X0               | Coiled-coil domain-containing protein 9 - Homo sapiens (Human)                      | CCDC9_HUMAN          |
| Q7Z6B0               | Coiled-coil domain-containing protein 91 - Homo sapiens (Human)                     | CCD91_HUMAN          |
| Q9NX63               | Coiled-coil-helix-coiled-coil-helix domain-containing protein 3 - Homo sapiens (Hum | CHCH3_HUMAN          |
| Q9NYJ1               | Coiled-coil-helix-coiled-coil-helix domain-containing protein 8 - Homo sapiens (Hum | Q9NYJ1_HUMAN         |
| Q14011               | Cold-inducible RNA-binding protein - Homo sapiens (Human)                           | CIRBP_HUMAN          |
| P02452               | Collagen alpha-1(I) chain precursor - Homo sapiens (Human)                          | CO1A1_HUMAN          |
| P02461               | Collagen alpha-1(III) chain precursor - Homo sapiens (Human)                        | CO3A1_HUMAN          |
| P20908               | Collagen alpha-1(V) chain precursor - Homo sapiens (Human)                          | CO5A1_HUMAN          |
| P12109               | Collagen alpha-1(VI) chain precursor - Homo sapiens (Human)                         | CO6A1_HUMAN          |
| P39059               | Collagen alpha-1(XV) chain precursor [Contains: Endostatin - Homo sapiens (Huma     | COFA1_HUMAN          |
| Q07092               | Collagen alpha-1(XVI) chain precursor - Homo sapiens (Human)                        | COGA1_HUMAN          |
| P39060               | Collagen alpha-1(XVIII) chain precursor [Contains: Endostatin] - Homo sapiens (Hu   | COIA1_HUMAN          |
| P08123               | Collagen alpha-2(I) chain precursor - Homo sapiens (Human)                          | CO1A2_HUMAN          |
| P08572               | Collagen alpha-2(IV) chain precursor [Contains: Canstatin] - Homo sapiens (Human)   | CO4A2_HUMAN          |
| P12110               | Collagen alpha-2(VI) chain precursor - Homo sapiens (Human)                         | CO6A2_HUMAN          |
| P25940               | Collagen alpha-3(V) chain precursor - Homo sapiens (Human)                          | CO5A3_HUMAN          |
| P12111               | Collagen alpha-3(VI) chain precursor - Homo sapiens (Human)                         | CO6A3_HUMAN          |
| P01024               | Complement C3 precursor [Contains: Complement C3 beta chain; Complement C3          | CO3_HUMAN            |
| Q07021               | Complement component 1 Q subcomponent-binding protein, mitochondrial precursor      | C1QBP_HUMAN          |
| P08603               | Complement factor H precursor - Homo sapiens (Human)                                | CFAH_HUMAN           |
| Q86VM9               | Conserved nuclear protein NHN1 - Homo sapiens (Human)                               | Q86VM9_HUMAN         |
| Q9UN52               | COP9 signalosome complex subunit 3 - Homo sapiens (Human)                           | CSN3_HUMAN           |
| O14618               | Copper chaperone for superoxide dismutase - Homo sapiens (Human)                    | CCS_HUMAN            |
| O00244               | Copper transport protein ATOX1 - Homo sapiens (Human)                               | ATOX1_HUMAN          |
| Q53SF7               | Cordon-bleu protein-like 1 - Homo sapiens (Human)                                   | COBL1_HUMAN          |
| P31146               | Coronin-1A - Homo sapiens (Human)                                                   | COR1A_HUMAN          |

| <i>Accession No*</i> | <i>Protein Name*</i>                                                              | <i>Reference No*</i> |
|----------------------|-----------------------------------------------------------------------------------|----------------------|
| Q9BR76               | Coronin-1B - Homo sapiens (Human)                                                 | COR1B_HUMAN          |
| Q9ULV4               | Coronin-1C - Homo sapiens (Human)                                                 | COR1C_HUMAN          |
| Q9UEE9               | Craniofacial development protein 1 - Homo sapiens (Human)                         | CFDP1_HUMAN          |
| P46109               | Crk-like protein - Homo sapiens (Human)                                           | CRKL_HUMAN           |
| O95402               | CRSP complex subunit 7 - Homo sapiens (Human)                                     | CRSP7_HUMAN          |
| Q9P2B4               | CTTNBP2 N-terminal-like protein - Homo sapiens (Human)                            | CT2NL_HUMAN          |
| O60494               | Cubilin precursor - Homo sapiens (Human)                                          | CUBN_HUMAN           |
| P46527               | Cyclin-dependent kinase inhibitor 1B - Homo sapiens (Human)                       | CDN1B_HUMAN          |
| O60563               | Cyclin-T1 - Homo sapiens (Human)                                                  | CCNT1_HUMAN          |
| P04080               | Cystatin-B - Homo sapiens (Human)                                                 | CYTB_HUMAN           |
| P21291               | Cysteine and glycine-rich protein 1 - Homo sapiens (Human)                        | CSRP1_HUMAN          |
| Q16527               | Cysteine and glycine-rich protein 2 - Homo sapiens (Human)                        | CSRP2_HUMAN          |
| P50238               | Cysteine-rich protein 1 - Homo sapiens (Human)                                    | CRIP1_HUMAN          |
| P52943               | Cysteine-rich protein 2 - Homo sapiens (Human)                                    | CRIP2_HUMAN          |
| Q6UXH1               | Cysteine-rich with EGF-like domain protein 2 precursor - Homo sapiens (Human)     | CREL2_HUMAN          |
| P00167               | Cytochrome b5 - Homo sapiens (Human)                                              | CYB5_HUMAN           |
| P99999               | Cytochrome c - Homo sapiens (Human)                                               | CYC_HUMAN            |
| Q49B96               | Cytochrome c oxidase assembly protein COX19 - Homo sapiens (Human)                | COX19_HUMAN          |
| P20674               | Cytochrome c oxidase subunit 5A, mitochondrial precursor - Homo sapiens (Human)   | COX5A_HUMAN          |
| P10606               | Cytochrome c oxidase subunit 5B, mitochondrial precursor - Homo sapiens (Human)   | COX5B_HUMAN          |
| P14854               | Cytochrome c oxidase subunit VIb isoform 1 - Homo sapiens (Human)                 | CX6B1_HUMAN          |
| Q13409               | Cytoplasmic dynein 1 intermediate chain 2 - Homo sapiens (Human)                  | DC1I2_HUMAN          |
| Q9Y6G9               | Cytoplasmic dynein 1 light intermediate chain 1 - Homo sapiens (Human)            | DC1L1_HUMAN          |
| O43237               | Cytoplasmic dynein 1 light intermediate chain 2 - Homo sapiens (Human)            | DC1L2_HUMAN          |
| O43639               | Cytoplasmic protein NCK2 - Homo sapiens (Human)                                   | NCK2_HUMAN           |
| P28838               | Cytosol aminopeptidase - Homo sapiens (Human)                                     | AMPL_HUMAN           |
| Q5TDH0               | DDI1 homolog 2 - Homo sapiens (Human)                                             | DDI2_HUMAN           |
| P51397               | Death-associated protein 1 - Homo sapiens (Human)                                 | DAP1_HUMAN           |
| Q9BTC0               | Death-inducer obliterator 1 - Homo sapiens (Human)                                | DIDO1_HUMAN          |
| Q14185               | Dedicator of cytokinesis protein 1 - Homo sapiens (Human)                         | DOCK1_HUMAN          |
| Q9H7D0               | Dedicator of cytokinesis protein 5 - Homo sapiens (Human)                         | DOCK5_HUMAN          |
| P30038               | Delta-1-pyrroline-5-carboxylate dehydrogenase, mitochondrial precursor - Homo sap | AL4A1_HUMAN          |
| Q08495               | Dematin - Homo sapiens (Human)                                                    | DEMA_HUMAN           |

| <i>Accession No*</i> | <i>Protein Name*</i>                                                               | <i>Reference No*</i> |
|----------------------|------------------------------------------------------------------------------------|----------------------|
| Q43583               | Density-regulated protein - Homo sapiens (Human)                                   | DENR_HUMAN           |
| Q9BU89               | Deoxyhypusine hydroxylase - Homo sapiens (Human)                                   | DOHH_HUMAN           |
| Q5TFJ4               | Deoxynucleotidyltransferase terminal-interacting protein 2 - Homo sapiens (Human)  | Q5TFJ4_HUMAN         |
| O00115               | Deoxyribonuclease-2-alpha precursor - Homo sapiens (Human)                         | DNS2A_HUMAN          |
| Q71E72               | DERPC - Homo sapiens (Human)                                                       | Q71E72_HUMAN         |
| P17661               | Desmin - Homo sapiens (Human)                                                      | DESM_HUMAN           |
| Q14126               | Desmoglein-2 precursor - Homo sapiens (Human)                                      | DSG2_HUMAN           |
| O15061               | Desmuslin - Homo sapiens (Human)                                                   | DMN_HUMAN            |
| Q96JH7               | Deubiquitinating protein VCIP135 - Homo sapiens (Human)                            | VCIP1_HUMAN          |
| O43150               | Development and differentiation-enhancing factor 2 - Homo sapiens (Human)          | DDEF2_HUMAN          |
| Q9H4E7               | Differentially expressed in FDCP 6 - Homo sapiens (Human)                          | DEFI6_HUMAN          |
| Q14117               | Dihydropyrimidinase - Homo sapiens (Human)                                         | DPYS_HUMAN           |
| Q86U75               | Dihydropyrimidinase-like 2 - Homo sapiens (Human)                                  | Q86U75_HUMAN         |
| Q16555               | Dihydropyrimidinase-related protein 2 - Homo sapiens (Human)                       | DPYL2_HUMAN          |
| Q6B011               | DIP2B protein - Homo sapiens (Human)                                               | Q6B011_HUMAN         |
| P98082               | Disabled homolog 2 - Homo sapiens (Human)                                          | DAB2_HUMAN           |
| Q5VWQ8               | Disabled homolog 2-interacting protein - Homo sapiens (Human)                      | DAB2P_HUMAN          |
| P26358               | DNA - Homo sapiens (Human)                                                         | DNMT1_HUMAN          |
| O00273               | DNA fragmentation factor subunit alpha - Homo sapiens (Human)                      | DDFA_HUMAN           |
| Q15054               | DNA polymerase subunit delta 3 - Homo sapiens (Human)                              | DPOD3_HUMAN          |
| P11387               | DNA topoisomerase 1 - Homo sapiens (Human)                                         | TOP1_HUMAN           |
| P27695               | DNA-(apurinic or apyrimidinic site) lyase - Homo sapiens (Human)                   | APEX1_HUMAN          |
| P16989               | DNA-binding protein A - Homo sapiens (Human)                                       | DBPA_HUMAN           |
| O15446               | DNA-directed RNA polymerase I subunit RPA34 - Homo sapiens (Human)                 | RPA34_HUMAN          |
| P25685               | DnaJ homolog subfamily B member 1 - Homo sapiens (Human)                           | DNJB1_HUMAN          |
| P25686               | DnaJ homolog subfamily B member 2 - Homo sapiens (Human)                           | DNJB2_HUMAN          |
| Q96KC8               | DnaJ homolog subfamily C member 1 - Homo sapiens (Human)                           | DNJC1_HUMAN          |
| Q9NVM6               | DnaJ homolog subfamily C member 17 - Homo sapiens (Human)                          | DJC17_HUMAN          |
| O75937               | DnaJ homolog subfamily C member 8 - Homo sapiens (Human)                           | DNJC8_HUMAN          |
| Q8WXX5               | DnaJ homolog subfamily C member 9 - Homo sapiens (Human)                           | DNJC9_HUMAN          |
| P18887               | DNA-repair protein XRCC1 - Homo sapiens (Human)                                    | XRCC1_HUMAN          |
| Q99704               | Docking protein 1 - Homo sapiens (Human)                                           | DOK1_HUMAN           |
| P04843               | Dolichyl-diphosphooligosaccharide--protein glycosyltransferase 67 kDa subunit prec | RIB1_HUMAN           |

| <i>Accession No*</i> | <i>Protein Name*</i>                                                                      | <i>Reference No*</i> |
|----------------------|-------------------------------------------------------------------------------------------|----------------------|
| Q9UHG0               | Doublecortin domain-containing protein 2 - Homo sapiens (Human)                           | DCDC2_HUMAN          |
| P49959               | Double-strand break repair protein MRE11A - Homo sapiens (Human)                          | MRE11_HUMAN          |
| P55265               | Double-stranded RNA-specific adenosine deaminase - Homo sapiens (Human)                   | DSRAD_HUMAN          |
| Q9C005               | Dpy-30-like protein - Homo sapiens (Human)                                                | DPY30_HUMAN          |
| Q6DEN2               | DPYSL3 protein - Homo sapiens (Human)                                                     | Q6DEN2_HUMAN         |
| Q9UJU6               | Drebrin-like protein - Homo sapiens (Human)                                               | DBNL_HUMAN           |
| Q53H88               | Dynactin 2 variant - Homo sapiens (Human)                                                 | Q53H88_HUMAN         |
| Q14118               | Dystroglycan precursor - Homo sapiens (Human)                                             | DAG1_HUMAN           |
| P49792               | E3 SUMO-protein ligase RanBP2 - Homo sapiens (Human)                                      | RBP2_HUMAN           |
| O43164               | E3 ubiquitin-protein ligase Praja2 - Homo sapiens (Human)                                 | PJA2_HUMAN           |
| Q15075               | Early endosome antigen 1 - Homo sapiens (Human)                                           | EEA1_HUMAN           |
| O00423               | Echinoderm microtubule-associated protein-like 1 - Homo sapiens (Human)                   | EMAL1_HUMAN          |
| Q9HC35               | Echinoderm microtubule-associated protein-like 4 - Homo sapiens (Human)                   | EMAL4_HUMAN          |
| Q8N3D4               | EH domain-binding protein 1-like protein 1 - Homo sapiens (Human)                         | EH1L1_HUMAN          |
| Q9H4M9               | EH domain-containing protein 1 - Homo sapiens (Human)                                     | EHD1_HUMAN           |
| Q9NZN4               | EH domain-containing protein 2 - Homo sapiens (Human)                                     | EHD2_HUMAN           |
| Q4LE58               | EIF4G1 variant protein - Homo sapiens (Human)                                             | Q4LE58_HUMAN         |
| P38117               | Electron transfer flavoprotein subunit beta - Homo sapiens (Human)                        | ETFB_HUMAN           |
| Q8IUUD2              | ELKS/RAB6-interacting/CAST family member 1 - Homo sapiens (Human)                         | RB6I2_HUMAN          |
| P24534               | Elongation factor 1-beta - Homo sapiens (Human)                                           | EF1B_HUMAN           |
| Q9Y6C2               | EMILIN-1 precursor - Homo sapiens (Human)                                                 | EMIL1_HUMAN          |
| Q9BXX0               | EMILIN-2 precursor - Homo sapiens (Human)                                                 | EMIL2_HUMAN          |
| Q9UI08               | Ena/VASP-like protein - Homo sapiens (Human)                                              | EVL_HUMAN            |
| P17813               | Endoglin precursor - Homo sapiens (Human)                                                 | EGLN_HUMAN           |
| P30040               | Endoplasmic reticulum protein ERp29 precursor - Homo sapiens (Human)                      | ERP29_HUMAN          |
| P14625               | Endoplasmin precursor - Homo sapiens (Human)                                              | ENPL_HUMAN           |
| Q96AP7               | Endothelial cell-selective adhesion molecule precursor - Homo sapiens (Human)             | ESAM_HUMAN           |
| O60869               | Endothelial differentiation-related factor 1 - Homo sapiens (Human)                       | EDF1_HUMAN           |
| Q14244               | Ensconsin - Homo sapiens (Human)                                                          | MAP7_HUMAN           |
| P52799               | Ephrin-B2 precursor - Homo sapiens (Human)                                                | EFNB2_HUMAN          |
| Q12929               | Epidermal growth factor receptor kinase substrate 8 - Homo sapiens (Human)                | EPS8_HUMAN           |
| Q9H6S3               | Epidermal growth factor receptor kinase substrate 8-like protein 2 - Homo sapiens (Human) | ES8L2_HUMAN          |
| P00533               | Epidermal growth factor receptor precursor - Homo sapiens (Human)                         | EGFR_HUMAN           |

| <i>Accession No*</i> | <i>Protein Name*</i>                                                                 | <i>Reference No*</i> |
|----------------------|--------------------------------------------------------------------------------------|----------------------|
| A0AVA9               | EPRS protein - Homo sapiens (Human)                                                  | A0AVA9_HUMAN         |
| Q9Y6I3               | Epsin-1 - Homo sapiens (Human)                                                       | EPN1_HUMAN           |
| Q5T8W7               | Espin. - Homo sapiens (Human)                                                        | Q5T8W7_HUMAN         |
| P05198               | Eukaryotic translation initiation factor 2 subunit 1 - Homo sapiens (Human)          | IF2A_HUMAN           |
| P20042               | Eukaryotic translation initiation factor 2 subunit 2 - Homo sapiens (Human)          | IF2B_HUMAN           |
| Q9BY44               | Eukaryotic translation initiation factor 2A - Homo sapiens (Human)                   | EIF2A_HUMAN          |
| Q14152               | Eukaryotic translation initiation factor 3 subunit 10 - Homo sapiens (Human)         | IF3A_HUMAN           |
| O75821               | Eukaryotic translation initiation factor 3 subunit 4 - Homo sapiens (Human)          | IF34_HUMAN           |
| O15371               | Eukaryotic translation initiation factor 3 subunit 7 - Homo sapiens (Human)          | IF37_HUMAN           |
| P78344               | Eukaryotic translation initiation factor 4 gamma 2 - Homo sapiens (Human)            | IF4G2_HUMAN          |
| Q4G0E3               | Eukaryotic translation initiation factor 4B - Homo sapiens (Human)                   | Q4G0E3_HUMAN         |
| Q13541               | Eukaryotic translation initiation factor 4E-binding protein 1 - Homo sapiens (Human) | 4EBP1_HUMAN          |
| Q13542               | Eukaryotic translation initiation factor 4E-binding protein 2 - Homo sapiens (Human) | 4EBP2_HUMAN          |
| Q15056               | Eukaryotic translation initiation factor 4H - Homo sapiens (Human)                   | IF4H_HUMAN           |
| P63241               | Eukaryotic translation initiation factor 5A-1 - Homo sapiens (Human)                 | IF5A1_HUMAN          |
| O60841               | Eukaryotic translation initiation factor 5B - Homo sapiens (Human)                   | IF2P_HUMAN           |
| Q9NZI9               | EVH1 domain binding protein - Homo sapiens (Human)                                   | Q9NZI9_HUMAN         |
| O14745               | Ezrin-radixin-moesin-binding phosphoprotein 50 - Homo sapiens (Human)                | NHERF_HUMAN          |
| Q05CP7               | FABP1 protein - Homo sapiens (Human)                                                 | Q05CP7_HUMAN         |
| Q08945               | FACT complex subunit SSRP1 - Homo sapiens (Human)                                    | SSRP1_HUMAN          |
| P52907               | F-actin-capping protein subunit alpha-1 - Homo sapiens (Human)                       | CAZA1_HUMAN          |
| Q96AL1               | FAM44A protein - Homo sapiens (Human)                                                | Q96AL1_HUMAN         |
| Q96AE4               | Far upstream element-binding protein 1 - Homo sapiens (Human)                        | FUBP1_HUMAN          |
| Q92945               | Far upstream element-binding protein 2 - Homo sapiens (Human)                        | FUBP2_HUMAN          |
| Q01469               | Fatty acid-binding protein, epidermal - Homo sapiens (Human)                         | FABPE_HUMAN          |
| P05413               | Fatty acid-binding protein, heart - Homo sapiens (Human)                             | FABPH_HUMAN          |
| Q9Y4F1               | FERM, RhoGEF and pleckstrin domain-containing protein 1 - Homo sapiens (Huma         | FARP1_HUMAN          |
| P02794               | Ferritin heavy chain - Homo sapiens (Human)                                          | FRIH_HUMAN           |
| Q9NVK5               | FGFR1 oncogene partner 2 - Homo sapiens (Human)                                      | FGOP2_HUMAN          |
| Q9Y6I3               | FH1/FH2 domain-containing protein 1 - Homo sapiens (Human)                           | FHOD1_HUMAN          |
| P35555               | Fibrillin-1 precursor - Homo sapiens (Human)                                         | FBN1_HUMAN           |
| P02671               | Fibrinogen alpha chain precursor [Contains: Fibrinopeptide A] - Homo sapiens (Hum    | FIBA_HUMAN           |
| P02675               | Fibrinogen beta chain precursor [Contains: Fibrinopeptide B] - Homo sapiens (Huma    | FIBB_HUMAN           |

| <i>Accession No*</i> | <i>Protein Name*</i>                                                           | <i>Reference No*</i> |
|----------------------|--------------------------------------------------------------------------------|----------------------|
| P02679               | Fibrinogen gamma chain precursor - Homo sapiens (Human)                        | FIBG_HUMAN           |
| P02751               | Fibronectin precursor - Homo sapiens (Human)                                   | FINC_HUMAN           |
| P23142               | Fibulin-1 precursor - Homo sapiens (Human)                                     | FBLN1_HUMAN          |
| Q5T1M5               | FK506-binding protein 15 - Homo sapiens (Human)                                | Q5T1M5_HUMAN         |
| P26885               | FK506-binding protein 2 precursor - Homo sapiens (Human)                       | FKBP2_HUMAN          |
| Q00688               | FK506-binding protein 3 - Homo sapiens (Human)                                 | FKBP3_HUMAN          |
| Q02790               | FK506-binding protein 4 - Homo sapiens (Human)                                 | FKBP4_HUMAN          |
| Q9Y680               | FK506-binding protein 7 precursor - Homo sapiens (Human)                       | FKBP7_HUMAN          |
| A5YM69               | FLJ43692 protein - Homo sapiens (Human)                                        | A5YM69_HUMAN         |
| Q12841               | Follistatin-related protein 1 precursor - Homo sapiens (Human)                 | FSTL1_HUMAN          |
| Q96QD9               | Forty-two-three domain-containing protein 1 - Homo sapiens (Human)             | FYTD1_HUMAN          |
| P51114               | Fragile X mental retardation syndrome-related protein 1 - Homo sapiens (Human) | FXR1_HUMAN           |
| Q16595               | Frataxin, mitochondrial precursor - Homo sapiens (Human)                       | FRDA_HUMAN           |
| O60353               | Frizzled-6 precursor - Homo sapiens (Human)                                    | FZD6_HUMAN           |
| P09467               | Fructose-1,6-bisphosphatase 1 - Homo sapiens (Human)                           | F16P1_HUMAN          |
| P04075               | Fructose-bisphosphate aldolase A - Homo sapiens (Human)                        | ALDOA_HUMAN          |
| P09972               | Fructose-bisphosphate aldolase C - Homo sapiens (Human)                        | ALDOC_HUMAN          |
| Q9BQS8               | FYVE and coiled-coil domain-containing protein 1 - Homo sapiens (Human)        | FYCO1_HUMAN          |
| Q6ZNL6               | FYVE, RhoGEF and PH domain-containing protein 5 - Homo sapiens (Human)         | FGD5_HUMAN           |
| Q92917               | G patch domain and KOW motifs-containing protein - Homo sapiens (Human)        | GPKOW_HUMAN          |
| Q9BRR8               | G patch domain-containing protein 1 - Homo sapiens (Human)                     | GPTC1_HUMAN          |
| Q6ZVF9               | G protein-regulated inducer of neurite outgrowth 3 - Homo sapiens (Human)      | GRIN3_HUMAN          |
| P09382               | Galectin-1 - Homo sapiens (Human)                                              | LEG1_HUMAN           |
| P05162               | Galectin-2 - Homo sapiens (Human)                                              | LEG2_HUMAN           |
| Q08380               | Galectin-3-binding protein precursor - Homo sapiens (Human)                    | LG3BP_HUMAN          |
| Q9UEY8               | Gamma-adducin - Homo sapiens (Human)                                           | ADDG_HUMAN           |
| Q92820               | Gamma-glutamyl hydrolase precursor - Homo sapiens (Human)                      | GGH_HUMAN            |
| P19440               | Gamma-glutamyltranspeptidase 1 precursor - Homo sapiens (Human)                | GGT1_HUMAN           |
| Q16666               | Gamma-interferon-inducible protein I $\gamma$ 16 - Homo sapiens (Human)        | IF16_HUMAN           |
| O76070               | Gamma-synuclein - Homo sapiens (Human)                                         | SYUG_HUMAN           |
| Q86XJ1               | GAS2-like protein 3 - Homo sapiens (Human)                                     | GA2L3_HUMAN          |
| O43716               | GatC-like protein - Homo sapiens (Human)                                       | GATCL_HUMAN          |
| Q9H751               | GC-rich promoter-binding protein 1-like 1 - Homo sapiens (Human)               | Q9H751_HUMAN         |

| <i>Accession No*</i> | <i>Protein Name*</i>                                                                | <i>Reference No*</i> |
|----------------------|-------------------------------------------------------------------------------------|----------------------|
| Q3V6T2               | Girdin - Homo sapiens (Human)                                                       | GRDN_HUMAN           |
| P14136               | Glial fibrillary acidic protein - Homo sapiens (Human)                              | GFAP_HUMAN           |
| P04150               | Glucocorticoid receptor - Homo sapiens (Human)                                      | GCR_HUMAN            |
| Q9NRY4               | Glucocorticoid receptor DNA-binding factor 1 - Homo sapiens (Human)                 | GRLF1_HUMAN          |
| Q86VQ1               | Glucocorticoid-induced transcript 1 protein - Homo sapiens (Human)                  | GLCI1_HUMAN          |
| P14314               | Glucosidase 2 subunit beta precursor - Homo sapiens (Human)                         | GLU2B_HUMAN          |
| Q07075               | Glutamyl aminopeptidase - Homo sapiens (Human)                                      | AMPE_HUMAN           |
| P35754               | Glutaredoxin-1 - Homo sapiens (Human)                                               | GLRX1_HUMAN          |
| Q86SX6               | Glutaredoxin-related protein 5 - Homo sapiens (Human)                               | GLRX5_HUMAN          |
| P04406               | Glyceraldehyde-3-phosphate dehydrogenase - Homo sapiens (Human)                     | G3P_HUMAN            |
| P23434               | Glycine cleavage system H protein, mitochondrial precursor - Homo sapiens (Huma     | GCSH_HUMAN           |
| P46976               | Glycogenin-1 - Homo sapiens (Human)                                                 | GLYG_HUMAN           |
| P30419               | Glycylpeptide N-tetradecanoyltransferase 1 - Homo sapiens (Human)                   | NMT1_HUMAN           |
| O00461               | Golgi phosphoprotein 4 - Homo sapiens (Human)                                       | GOLP4_HUMAN          |
| Q9H8Y8               | Golgi reassembly-stacking protein 2 - Homo sapiens (Human)                          | GORS2_HUMAN          |
| Q92805               | Golgin subfamily A member 1 - Homo sapiens (Human)                                  | GOGA1_HUMAN          |
| Q08379               | Golgin subfamily A member 2 - Homo sapiens (Human)                                  | GOGA2_HUMAN          |
| Q08378               | Golgin subfamily A member 3 - Homo sapiens (Human)                                  | GOGA3_HUMAN          |
| Q8TBA6               | Golgin subfamily A member 5 - Homo sapiens (Human)                                  | GOGA5_HUMAN          |
| Q14789               | Golgin subfamily B member 1 - Homo sapiens (Human)                                  | GOGB1_HUMAN          |
| Q13480               | GRB2-associated-binding protein 1 - Homo sapiens (Human)                            | GAB1_HUMAN           |
| P62993               | Growth factor receptor-bound protein 2 - Homo sapiens (Human)                       | GRB2_HUMAN           |
| Q8N6H7               | GTPase-activating protein ZNF289 - Homo sapiens (Human)                             | ZN289_HUMAN          |
| Q9UBI6               | Guanine nucleotide-binding protein G(I)/G(S)/G(O) gamma-12 subunit precursor - H    | GBG12_HUMAN          |
| O60832               | H/ACA ribonucleoprotein complex subunit 4 - Homo sapiens (Human)                    | DKC1_HUMAN           |
| P00738               | Haptoglobin precursor [Contains: Haptoglobin alpha chain; Haptoglobin beta chain] - | HPT_HUMAN            |
| Q9Y450               | HBS1-like protein - Homo sapiens (Human)                                            | HBS1L_HUMAN          |
| P34932               | Heat shock 70 kDa protein 4 - Homo sapiens (Human)                                  | HSP74_HUMAN          |
| P11142               | Heat shock cognate 71 kDa protein - Homo sapiens (Human)                            | HSP7C_HUMAN          |
| O75506               | Heat shock factor-binding protein 1 - Homo sapiens (Human)                          | HSBP1_HUMAN          |
| P04792               | Heat shock protein beta-1 - Homo sapiens (Human)                                    | HSPB1_HUMAN          |
| O14558               | Heat shock protein beta-6 - Homo sapiens (Human)                                    | HSPB6_HUMAN          |
| P08238               | Heat shock protein HSP 90-beta - Homo sapiens (Human)                               | HS90B_HUMAN          |

| <i>Accession No*</i> | <i>Protein Name*</i>                                                                      | <i>Reference No*</i> |
|----------------------|-------------------------------------------------------------------------------------------|----------------------|
| Q9UK76               | Hematological and neurological expressed 1 protein - Homo sapiens (Human)                 | HN1_HUMAN            |
| Q9H910               | Hematological and neurological expressed 1-like protein - Homo sapiens (Human)            | HN1L_HUMAN           |
| P14317               | Hematopoietic lineage cell-specific protein - Homo sapiens (Human)                        | HCLS1_HUMAN          |
| Q9NRV9               | Heme-binding protein 1 - Homo sapiens (Human)                                             | HEBP1_HUMAN          |
| P02042               | Hemoglobin subunit delta - Homo sapiens (Human)                                           | HBD_HUMAN            |
| P02790               | Hemopexin precursor - Homo sapiens (Human)                                                | HEMO_HUMAN           |
| O43504               | Hepatitis B virus X-interacting protein - Homo sapiens (Human)                            | XIP_HUMAN            |
| P20823               | Hepatocyte nuclear factor 1-alpha - Homo sapiens (Human)                                  | HNF1A_HUMAN          |
| P35680               | Hepatocyte nuclear factor 1-beta - Homo sapiens (Human)                                   | HNF1B_HUMAN          |
| P51858               | Hepatoma-derived growth factor - Homo sapiens (Human)                                     | HDGF_HUMAN           |
| Q9Y3E1               | Hepatoma-derived growth factor-related protein 3 - Homo sapiens (Human)                   | HDGR3_HUMAN          |
| Q99729               | Heterogeneous nuclear ribonucleoprotein A/B - Homo sapiens (Human)                        | ROAA_HUMAN           |
| Q13151               | Heterogeneous nuclear ribonucleoprotein A0 - Homo sapiens (Human)                         | ROA0_HUMAN           |
| Q14103               | Heterogeneous nuclear ribonucleoprotein D0 - Homo sapiens (Human)                         | HNRPD_HUMAN          |
| O14979               | Heterogeneous nuclear ribonucleoprotein D-like - Homo sapiens (Human)                     | HNRDL_HUMAN          |
| P52597               | Heterogeneous nuclear ribonucleoprotein F - Homo sapiens (Human)                          | HNRPF_HUMAN          |
| P31942               | Heterogeneous nuclear ribonucleoprotein H3 - Homo sapiens (Human)                         | HNRH3_HUMAN          |
| P52272               | Heterogeneous nuclear ribonucleoprotein M - Homo sapiens (Human)                          | HNRPM_HUMAN          |
| O60506               | Heterogeneous nuclear ribonucleoprotein Q - Homo sapiens (Human)                          | HNRPQ_HUMAN          |
| Q00839               | Heterogeneous nuclear ribonucleoprotein U - Homo sapiens (Human)                          | HNRPU_HUMAN          |
| Q9BUJ2               | Heterogeneous nuclear ribonucleoprotein U-like protein 1 - Homo sapiens (Human)           | HNRL1_HUMAN          |
| Q1KMD3               | Heterogeneous nuclear ribonucleoprotein U-like protein 2 - Homo sapiens (Human)           | HNRL2_HUMAN          |
| P22626               | Heterogeneous nuclear ribonucleoproteins A2/B1 - Homo sapiens (Human)                     | ROA2_HUMAN           |
| P07910               | Heterogeneous nuclear ribonucleoproteins C1/C2 - Homo sapiens (Human)                     | HNRPC_HUMAN          |
| O94992               | Hexamethylene bis-acetamide-inducible protein 1. - Homo sapiens (Human)                   | O94992_HUMAN         |
| Q15651               | High mobility group nucleosome-binding domain-containing protein 3 - Homo sapiens (Human) | HMG3_HUMAN           |
| O00479               | High mobility group nucleosome-binding domain-containing protein 4 - Homo sapiens (Human) | HMG4_HUMAN           |
| P26583               | High mobility group protein B2 - Homo sapiens (Human)                                     | HMGB2_HUMAN          |
| O15347               | High mobility group protein B3 - Homo sapiens (Human)                                     | HMGB3_HUMAN          |
| P17096               | High mobility group protein HMG-I/HMG-Y - Homo sapiens (Human)                            | HMG1_HUMAN           |
| Q9BW71               | HIRA-interacting protein 3 - Homo sapiens (Human)                                         | HIRP3_HUMAN          |
| P49773               | Histidine triad nucleotide-binding protein 1 - Homo sapiens (Human)                       | HINT1_HUMAN          |
| Q9BX68               | Histidine triad nucleotide-binding protein 2 - Homo sapiens (Human)                       | HINT2_HUMAN          |



| <i>Accession No*</i> | <i>Protein Name*</i>                                                              | <i>Reference No*</i> |
|----------------------|-----------------------------------------------------------------------------------|----------------------|
| P04196               | Histidine-rich glycoprotein precursor - Homo sapiens (Human)                      | HRG_HUMAN            |
| Q6P189               | Histocompatibility - Homo sapiens (Human)                                         | Q6P189_HUMAN         |
| P07305               | Histone H1.0 - Homo sapiens (Human)                                               | H10_HUMAN            |
| Q02539               | Histone H1.1 - Homo sapiens (Human)                                               | H11_HUMAN            |
| P16403               | Histone H1.2 - Homo sapiens (Human)                                               | H12_HUMAN            |
| P16402               | Histone H1.3 - Homo sapiens (Human)                                               | H13_HUMAN            |
| P16401               | Histone H1.5 - Homo sapiens (Human)                                               | H15_HUMAN            |
| Q92522               | Histone H1x - Homo sapiens (Human)                                                | H1X_HUMAN            |
| P16104               | Histone H2A.x - Homo sapiens (Human)                                              | H2AX_HUMAN           |
| P62805               | Histone H4 - Homo sapiens (Human)                                                 | H4_HUMAN             |
| Q8WTS6               | Histone-lysine N-methyltransferase, H3 lysine-4 specific SET7 - Homo sapiens (Hu) | SETD7_HUMAN          |
| O43719               | HIV Tat-specific factor 1 - Homo sapiens (Human)                                  | HTSF1_HUMAN          |
| Q86VS8               | Hook homolog 3 - Homo sapiens (Human)                                             | HOOK3_HUMAN          |
| Q86YZ3               | Hornerin - Homo sapiens (Human)                                                   | HORN_HUMAN           |
| P51610               | Host cell factor - Homo sapiens (Human)                                           | HCFC1_HUMAN          |
| Q16543               | Hsp90 co-chaperone Cdc37 - Homo sapiens (Human)                                   | CDC37_HUMAN          |
| Q2KHP4               | HSPA5 protein - Homo sapiens (Human)                                              | Q2KHP4_HUMAN         |
| Q969G5               | HSRBC protein - Homo sapiens (Human)                                              | Q969G5_HUMAN         |
| Q9NX55               | Huntingtin-interacting protein HYPK - Homo sapiens (Human)                        | HYPK_HUMAN           |
| Q9Y4L1               | Hypoxia up-regulated protein 1 precursor - Homo sapiens (Human)                   | HYOU1_HUMAN          |
| P01611               | Ig kappa chain V-I region Wes - Homo sapiens (Human)                              | KV119_HUMAN          |
| P01591               | Immunoglobulin J chain - Homo sapiens (Human)                                     | IGJ_HUMAN            |
| P78318               | Immunoglobulin-binding protein 1 - Homo sapiens (Human)                           | IGBP1_HUMAN          |
| Q9UPR0               | Inactive phospholipase C-like protein 2 - Homo sapiens (Human)                    | PLCL2_HUMAN          |
| Q9Y2U8               | Inner nuclear membrane protein Man1 - Homo sapiens (Human)                        | MAN1_HUMAN           |
| O15357               | Inositol polyphosphate phosphatase-like protein 1 - Homo sapiens (Human)          | O15357_HUMAN         |
| P27987               | Inositol-trisphosphate 3-kinase B - Homo sapiens (Human)                          | IP3KB_HUMAN          |
| P24593               | Insulin-like growth factor-binding protein 5 precursor - Homo sapiens (Human)     | IBP5_HUMAN           |
| Q16270               | Insulin-like growth factor-binding protein 7 precursor - Homo sapiens (Human)     | IBP7_HUMAN           |
| P19827               | Inter-alpha-trypsin inhibitor heavy chain H1 precursor - Homo sapiens (Human)     | ITIH1_HUMAN          |
| P05362               | Intercellular adhesion molecule 1 precursor - Homo sapiens (Human)                | ICAM1_HUMAN          |
| Q12906               | Interleukin enhancer-binding factor 3 - Homo sapiens (Human)                      | ILF3_HUMAN           |
| Q5JVS0               | Intracellular hyaluronan-binding protein 4 - Homo sapiens (Human)                 | HABP4_HUMAN          |

| <i>Accession No*</i> | <i>Protein Name*</i>                                                                | <i>Reference No*</i> |
|----------------------|-------------------------------------------------------------------------------------|----------------------|
| Q86U28               | Iron-sulfur cluster assembly 2 homolog, mitochondrial precursor - Homo sapiens (H   | ISCA2_HUMAN          |
| Q96ST2               | IWS1 homolog - Homo sapiens (Human)                                                 | IWS1_HUMAN           |
| Q96IF1               | JUB protein - Homo sapiens (Human)                                                  | Q96IF1_HUMAN         |
| P13645               | Keratin, type I cytoskeletal 10 - Homo sapiens (Human)                              | K1C10_HUMAN          |
| P05783               | Keratin, type I cytoskeletal 18 - Homo sapiens (Human)                              | K1C18_HUMAN          |
| P08727               | Keratin, type I cytoskeletal 19 - Homo sapiens (Human)                              | K1C19_HUMAN          |
| P35527               | Keratin, type I cytoskeletal 9 - Homo sapiens (Human)                               | K1C9_HUMAN           |
| P04264               | Keratin, type II cytoskeletal 1 - Homo sapiens (Human)                              | K2C1_HUMAN           |
| P35908               | Keratin, type II cytoskeletal 2 epidermal - Homo sapiens (Human)                    | K22E_HUMAN           |
| P13647               | Keratin, type II cytoskeletal 5 - Homo sapiens (Human)                              | K2C5_HUMAN           |
| P05787               | Keratin, type II cytoskeletal 8 - Homo sapiens (Human)                              | K2C8_HUMAN           |
| Q07666               | KH domain-containing, RNA-binding, signal transduction-associated protein 1 - Hom   | SAM68_HUMAN          |
| Q86UP2               | Kinectin - Homo sapiens (Human)                                                     | KTN1_HUMAN           |
| P33176               | Kinesin heavy chain - Homo sapiens (Human)                                          | KINH_HUMAN           |
| Q9H0B6               | Kinesin light chain 2 - Homo sapiens (Human)                                        | KLC2_HUMAN           |
| Q9NQ78               | Kinesin-like protein KIF13B - Homo sapiens (Human)                                  | KI13B_HUMAN          |
| Q7Z4S6               | Kinesin-like protein KIF21A - Homo sapiens (Human)                                  | KI21A_HUMAN          |
| Q04760               | Lactoylglutathione lyase - Homo sapiens (Human)                                     | LGUL_HUMAN           |
| P02545               | Lamin-A/C - Homo sapiens (Human)                                                    | LMNA_HUMAN           |
| P42167               | Lamina-associated polypeptide 2, isoforms beta/gamma - Homo sapiens (Human)         | LAP2B_HUMAN          |
| Q14739               | Lamin-B receptor - Homo sapiens (Human)                                             | LBR_HUMAN            |
| P20700               | Lamin-B1 - Homo sapiens (Human)                                                     | LMNB1_HUMAN          |
| Q03252               | Lamin-B2 - Homo sapiens (Human)                                                     | LMNB2_HUMAN          |
| Q16363               | Laminin subunit alpha-4 precursor - Homo sapiens (Human)                            | LAMA4_HUMAN          |
| O15230               | Laminin subunit alpha-5 precursor - Homo sapiens (Human)                            | LAMA5_HUMAN          |
| P07942               | Laminin subunit beta-1 precursor - Homo sapiens (Human)                             | LAMB1_HUMAN          |
| P55268               | Laminin subunit beta-2 precursor - Homo sapiens (Human)                             | LAMB2_HUMAN          |
| P11047               | Laminin subunit gamma-1 precursor - Homo sapiens (Human)                            | LAMC1_HUMAN          |
| Q6PKG0               | La-related protein 1 - Homo sapiens (Human)                                         | LARP1_HUMAN          |
| Q14767               | Latent-transforming growth factor beta-binding protein 2 precursor - Homo sapiens ( | LTBP2_HUMAN          |
| Q9NS15               | Latent-transforming growth factor beta-binding protein 3 precursor - Homo sapiens ( | LTBP3_HUMAN          |
| Q5VUU2               | Leiomodoin 1 - Homo sapiens (Human)                                                 | Q5VUU2_HUMAN         |
| Q86V48               | Leucine zipper protein 1 - Homo sapiens (Human)                                     | LUZP1_HUMAN          |

| <i>Accession No*</i> | <i>Protein Name*</i>                                                                | <i>Reference No*</i> |
|----------------------|-------------------------------------------------------------------------------------|----------------------|
| Q9Y250               | Leucine zipper putative tumor suppressor 1 - Homo sapiens (Human)                   | LZTS1_HUMAN          |
| P02750               | Leucine-rich alpha-2-glycoprotein precursor - Homo sapiens (Human)                  | A2GL_HUMAN           |
| Q32MZ4               | Leucine-rich repeat flightless-interacting protein 1 - Homo sapiens (Human)         | LRRF1_HUMAN          |
| Q9Y608               | Leucine-rich repeat flightless-interacting protein 2 - Homo sapiens (Human)         | LRRF2_HUMAN          |
| Q8N1G4               | Leucine-rich repeat-containing protein 47 - Homo sapiens (Human)                    | LRC47_HUMAN          |
| Q96AG4               | Leucine-rich repeat-containing protein 59 - Homo sapiens (Human)                    | LRC59_HUMAN          |
| Q9UIQ6               | Leucyl-cystinyl aminopeptidase - Homo sapiens (Human)                               | LCAP_HUMAN           |
| Q96BZ8               | Leukocyte receptor cluster member 1 - Homo sapiens (Human)                          | LENG1_HUMAN          |
| Q6GTX8               | Leukocyte-associated immunoglobulin-like receptor 1 precursor - Homo sapiens (Hu    | LAIR1_HUMAN          |
| Q9UNZ5               | Leydig cell tumor 10 kDa protein homolog - Homo sapiens (Human)                     | L10K_HUMAN           |
| Q14847               | LIM and SH3 domain protein 1 - Homo sapiens (Human)                                 | LASP1_HUMAN          |
| Q8WWI1               | LIM domain only protein 7 - Homo sapiens (Human)                                    | LMO7_HUMAN           |
| Q9UGP4               | LIM domain-containing protein 1 - Homo sapiens (Human)                              | LIMD1_HUMAN          |
| Q70I54               | LIM-nebulette - Homo sapiens (Human)                                                | Q70I54_HUMAN         |
| Q92539               | Lipin-2 - Homo sapiens (Human)                                                      | LPIN2_HUMAN          |
| Q86X29               | Lipolysis-stimulated lipoprotein receptor - Homo sapiens (Human)                    | LSR_HUMAN            |
| Q93052               | Lipoma-preferred partner - Homo sapiens (Human)                                     | LPP_HUMAN            |
| Q13136               | Liprin-alpha-1 - Homo sapiens (Human)                                               | LIPA1_HUMAN          |
| Q86W92               | Liprin-beta-1 - Homo sapiens (Human)                                                | LIPB1_HUMAN          |
| Q8ND30               | Liprin-beta-2 - Homo sapiens (Human)                                                | LIPB2_HUMAN          |
| P00338               | L-lactate dehydrogenase A chain - Homo sapiens (Human)                              | LDHA_HUMAN           |
| P07195               | L-lactate dehydrogenase B chain - Homo sapiens (Human)                              | LDHB_HUMAN           |
| Q7Z7L8               | LOC387763 protein - Homo sapiens (Human)                                            | Q7Z7L8_HUMAN         |
| P98164               | Low-density lipoprotein receptor-related protein 2 precursor - Homo sapiens (Human) | LRP2_HUMAN           |
| Q9BSL6               | LRRFIP1 protein - Homo sapiens (Human)                                              | Q9BSL6_HUMAN         |
| Q8ND56               | LSM14 protein homolog A - Homo sapiens (Human)                                      | LS14A_HUMAN          |
| P51884               | Lumican precursor - Homo sapiens (Human)                                            | LUM_HUMAN            |
| P05455               | Lupus La protein - Homo sapiens (Human)                                             | LA_HUMAN             |
| P50895               | Lutheran blood group glycoprotein precursor - Homo sapiens (Human)                  | LU_HUMAN             |
| Q13094               | Lymphocyte cytosolic protein 2 - Homo sapiens (Human)                               | LCP2_HUMAN           |
| P33241               | Lymphocyte-specific protein 1 - Homo sapiens (Human)                                | LSP1_HUMAN           |
| Q8IV50               | LysM and putative peptidoglycan-binding domain-containing protein 2 - Homo sapie    | LYSM2_HUMAN          |
| O00754               | Lysosomal alpha-mannosidase precursor - Homo sapiens (Human)                        | MA2B1_HUMAN          |

| <i>Accession No*</i> | <i>Protein Name*</i>                                                            | <i>Reference No*</i> |
|----------------------|---------------------------------------------------------------------------------|----------------------|
| P61626               | Lysozyme C precursor - Homo sapiens (Human)                                     | LYSC_HUMAN           |
| Q16626               | Male-enhanced antigen 1 - Homo sapiens (Human)                                  | MEA1_HUMAN           |
| O60664               | Mannose-6-phosphate receptor-binding protein 1 - Homo sapiens (Human)           | M6PBP_HUMAN          |
| P49006               | MARCKS-related protein - Homo sapiens (Human)                                   | MRP_HUMAN            |
| P43243               | Matrin-3 - Homo sapiens (Human)                                                 | MATR3_HUMAN          |
| P08493               | Matrix Gla protein precursor - Homo sapiens (Human)                             | MGP_HUMAN            |
| Q9NR99               | Matrix-remodeling-associated protein 5 precursor - Homo sapiens (Human)         | MXRA5_HUMAN          |
| P84157               | Matrix-remodeling-associated protein 7 - Homo sapiens (Human)                   | MXRA7_HUMAN          |
| Q6ZR64               | Matrix-remodelling associated protein 7 - Homo sapiens (Human)                  | Q6ZR64_HUMAN         |
| Q5JRA6               | Melanoma inhibitory activity protein 3 precursor - Homo sapiens (Human)         | MIA3_HUMAN           |
| Q9UNF1               | Melanoma-associated antigen D2 - Homo sapiens (Human)                           | MAGD2_HUMAN          |
| Q96MG7               | Melanoma-associated antigen G1 - Homo sapiens (Human)                           | MAGG1_HUMAN          |
| O00264               | Membrane-associated progesterone receptor component 1 - Homo sapiens (Human)    | PGRC1_HUMAN          |
| Q14696               | Mesoderm development candidate 2 - Homo sapiens (Human)                         | MESD2_HUMAN          |
| O43312               | Metastasis suppressor protein 1 - Homo sapiens (Human)                          | MTSS1_HUMAN          |
| P50579               | Methionine aminopeptidase 2 - Homo sapiens (Human)                              | AMPM2_HUMAN          |
| P56192               | Methionyl-tRNA synthetase, cytoplasmic - Homo sapiens (Human)                   | SYMC_HUMAN           |
| Q9UBB5               | Methyl-CpG-binding domain protein 2 - Homo sapiens (Human)                      | MBD2_HUMAN           |
| P51608               | Methyl-CpG-binding protein 2 - Homo sapiens (Human)                             | MECP2_HUMAN          |
| Q8N3F8               | MICAL-like protein 1 - Homo sapiens (Human)                                     | MILK1_HUMAN          |
| Q8IY33               | MICAL-like protein 2 - Homo sapiens (Human)                                     | MILK2_HUMAN          |
| P55081               | Microfibrillar-associated protein 1 - Homo sapiens (Human)                      | MFAP1_HUMAN          |
| P78559               | Microtubule-associated protein 1A - Homo sapiens (Human)                        | MAP1A_HUMAN          |
| P11137               | Microtubule-associated protein 2 - Homo sapiens (Human)                         | MAP2_HUMAN           |
| Q59FT2               | Microtubule-associated protein 4 isoform 1 variant - Homo sapiens (Human)       | Q59FT2_HUMAN         |
| Q15691               | Microtubule-associated protein RP/EB family member 1 - Homo sapiens (Human)     | MARE1_HUMAN          |
| Q15555               | Microtubule-associated protein RP/EB family member 2 - Homo sapiens (Human)     | MARE2_HUMAN          |
| P10636               | Microtubule-associated protein tau - Homo sapiens (Human)                       | TAU_HUMAN            |
| O15021               | Microtubule-associated serine/threonine-protein kinase 4 - Homo sapiens (Human) | MAST4_HUMAN          |
| Q9Y2B0               | MIR-interacting saposin-like protein precursor - Homo sapiens (Human)           | MSAP_HUMAN           |
| P82909               | Mitochondrial 28S ribosomal protein S36 - Homo sapiens (Human)                  | RT36_HUMAN           |
| Q7Z434               | Mitochondrial antiviral-signaling protein - Homo sapiens (Human)                | MAVS_HUMAN           |
| P62072               | Mitochondrial import inner membrane translocase subunit Tim10 - Homo sapiens (H | TIM10_HUMAN          |

| <i>Accession No*</i> | <i>Protein Name*</i>                                                               | <i>Reference No*</i> |
|----------------------|------------------------------------------------------------------------------------|----------------------|
| Q9Y5L4               | Mitochondrial import inner membrane translocase subunit Tim13 - Homo sapiens (H    | TIM13_HUMAN          |
| O60220               | Mitochondrial import inner membrane translocase subunit Tim8 A - Homo sapiens (    | TIM8A_HUMAN          |
| Q8N4Q1               | Mitochondrial intermembrane space import and assembly protein 40 - Homo sapien     | MIA40_HUMAN          |
| Q9BYG3               | MKI67 FHA domain-interacting nucleolar phosphoprotein - Homo sapiens (Human)       | MK671_HUMAN          |
| P26038               | Moesin - Homo sapiens (Human)                                                      | MOES_HUMAN           |
| P53985               | Monocarboxylate transporter 1 - Homo sapiens (Human)                               | MOT1_HUMAN           |
| Q9Y605               | MORF4 family-associated protein 1 - Homo sapiens (Human)                           | Q9Y605_HUMAN         |
| Q99549               | M-phase phosphoprotein 8 - Homo sapiens (Human)                                    | MPP8_HUMAN           |
| Q9H8L6               | Multimerin-2 precursor - Homo sapiens (Human)                                      | MMRN2_HUMAN          |
| Q8NI22               | Multiple coagulation factor deficiency protein 2 precursor - Homo sapiens (Human)  | MCFD2_HUMAN          |
| O00499               | Myc box-dependent-interacting protein 1 - Homo sapiens (Human)                     | BIN1_HUMAN           |
| P41218               | Myeloid cell nuclear differentiation antigen - Homo sapiens (Human)                | MNDA_HUMAN           |
| Q15746               | Myosin light chain kinase, smooth muscle - Homo sapiens (Human)                    | MYLK_HUMAN           |
| P12829               | Myosin light polypeptide 4 - Homo sapiens (Human)                                  | MYL4_HUMAN           |
| P60660               | Myosin light polypeptide 6 - Homo sapiens (Human)                                  | MYL6_HUMAN           |
| P14649               | Myosin light polypeptide 6B - Homo sapiens (Human)                                 | MYL6B_HUMAN          |
| Q6WCQ1               | Myosin phosphatase Rho-interacting protein - Homo sapiens (Human)                  | MRIP_HUMAN           |
| P35580               | Myosin-10 - Homo sapiens (Human)                                                   | MYH10_HUMAN          |
| P35579               | Myosin-9 - Homo sapiens (Human)                                                    | MYH9_HUMAN           |
| Q12965               | Myosin-Ie - Homo sapiens (Human)                                                   | MYO1E_HUMAN          |
| O00160               | Myosin-Ig - Homo sapiens (Human)                                                   | MYO1F_HUMAN          |
| Q96JP2               | Myosin-XVB - Homo sapiens (Human)                                                  | MO15B_HUMAN          |
| Q92614               | Myosin-XVIIIa - Homo sapiens (Human)                                               | MY18A_HUMAN          |
| P58546               | Myotrophin - Homo sapiens (Human)                                                  | MTPN_HUMAN           |
| P29966               | Myristoylated alanine-rich C-kinase substrate - Homo sapiens (Human)               | MARCS_HUMAN          |
| O94760               | N(G),N(G)-dimethylarginine dimethylaminohydrolase 1 - Homo sapiens (Human)         | DDAH1_HUMAN          |
| P15586               | N-acetylglucosamine-6-sulfatase precursor - Homo sapiens (Human)                   | GNS_HUMAN            |
| Q8WU60               | NADH dehydrogenase - Homo sapiens (Human)                                          | Q8WU60_HUMAN         |
| O43678               | NADH dehydrogenase [ubiquinone] 1 alpha subcomplex subunit 2 - Homo sapiens (      | NDUA2_HUMAN          |
| O95182               | NADH dehydrogenase [ubiquinone] 1 alpha subcomplex subunit 7 - Homo sapiens (      | NDUA7_HUMAN          |
| P19404               | NADH dehydrogenase [ubiquinone] flavoprotein 2, mitochondrial precursor - Homo s   | NDUV2_HUMAN          |
| O43181               | NADH dehydrogenase [ubiquinone] iron-sulfur protein 4, mitochondrial precursor - H | NDUS4_HUMAN          |
| O75380               | NADH dehydrogenase [ubiquinone] iron-sulfur protein 6, mitochondrial precursor - H | NDUS6_HUMAN          |

| <i>Accession No*</i> | <i>Protein Name*</i>                                                              | <i>Reference No*</i> |
|----------------------|-----------------------------------------------------------------------------------|----------------------|
| Q6T4R5               | Nance-Horan syndrome protein - Homo sapiens (Human)                               | NHS_HUMAN            |
| Q13765               | Nascent polypeptide-associated complex subunit alpha - Homo sapiens (Human)       | NACA_HUMAN           |
| Q15843               | NEDD8 precursor - Homo sapiens (Human)                                            | NEDD8_HUMAN          |
| P48681               | Nestin - Homo sapiens (Human)                                                     | NEST_HUMAN           |
| Q9UMX5               | Neudesin precursor - Homo sapiens (Human)                                         | NENF_HUMAN           |
| Q96SB3               | Neurabin-2 - Homo sapiens (Human)                                                 | NEB2_HUMAN           |
| O00401               | Neural Wiskott-Aldrich syndrome protein - Homo sapiens (Human)                    | WASL_HUMAN           |
| Q09666               | Neuroblast differentiation-associated protein AHNAK - Homo sapiens (Human)        | AHNAK_HUMAN          |
| P0C2Y1               | Neuroblastoma breakpoint family member 7 - Homo sapiens (Human)                   | NBPF7_HUMAN          |
| Q14697               | Neutral alpha-glucosidase AB precursor - Homo sapiens (Human)                     | GANAB_HUMAN          |
| P43007               | Neutral amino acid transporter A - Homo sapiens (Human)                           | SATT_HUMAN           |
| Q8NCF5               | NFATC2-interacting protein - Homo sapiens (Human)                                 | NF2IP_HUMAN          |
| Q5SYE7               | NHS-like protein 1. - Homo sapiens (Human)                                        | Q5SYE7_HUMAN         |
| O60934               | Nibrin - Homo sapiens (Human)                                                     | NBN_HUMAN            |
| P14543               | Nidogen-1 precursor - Homo sapiens (Human)                                        | NID1_HUMAN           |
| Q6KC79               | Nipped-B-like protein - Homo sapiens (Human)                                      | NIPBL_HUMAN          |
| Q9Y314               | Nitric oxide synthase-interacting protein - Homo sapiens (Human)                  | NOSIP_HUMAN          |
| P05114               | Nonhistone chromosomal protein HMG-14 - Homo sapiens (Human)                      | HMG1_HUMAN           |
| P05204               | Nonhistone chromosomal protein HMG-17 - Homo sapiens (Human)                      | HMG2_HUMAN           |
| Q15233               | Non-POU domain-containing octamer-binding protein - Homo sapiens (Human)          | NONO_HUMAN           |
| P22307               | Nonspecific lipid-transfer protein - Homo sapiens (Human)                         | NLTP_HUMAN           |
| Q5T992               | Novel protein - Homo sapiens (Human)                                              | Q5T992_HUMAN         |
| Q9UNZ2               | NSFL1 cofactor p47 - Homo sapiens (Human)                                         | NSF1C_HUMAN          |
| P23497               | Nuclear autoantigen Sp-100 - Homo sapiens (Human)                                 | SP100_HUMAN          |
| Q13469               | Nuclear factor of activated T-cells, cytoplasmic 2 - Homo sapiens (Human)         | NFAC2_HUMAN          |
| Q12968               | Nuclear factor of activated T-cells, cytoplasmic 3 - Homo sapiens (Human)         | NFAC3_HUMAN          |
| Q7Z417               | Nuclear fragile X mental retardation-interacting protein 2 - Homo sapiens (Human) | NUFP2_HUMAN          |
| Q14980               | Nuclear mitotic apparatus protein 1 - Homo sapiens (Human)                        | NUMA1_HUMAN          |
| P49790               | Nuclear pore complex protein Nup153 - Homo sapiens (Human)                        | NU153_HUMAN          |
| P52948               | Nuclear pore complex protein Nup98-Nup96 precursor [Contains: Nuclear pore com    | NUP98_HUMAN          |
| P82979               | Nuclear protein Hcc-1 - Homo sapiens (Human)                                      | HCC1_HUMAN           |
| Q14686               | Nuclear receptor coactivator 6 - Homo sapiens (Human)                             | NCOA6_HUMAN          |
| A2RRE3               | Nuclear receptor interacting protein 2 - Homo sapiens (Human)                     | A2RRE3_HUMAN         |

| <i>Accession No*</i> | <i>Protein Name*</i>                                                                    | <i>Reference No*</i> |
|----------------------|-----------------------------------------------------------------------------------------|----------------------|
| P23511               | Nuclear transcription factor Y subunit alpha - Homo sapiens (Human)                     | NFYA_HUMAN           |
| Q9H1E3               | Nuclear ubiquitous casein and cyclin-dependent kinases substrate - Homo sapiens (Human) | NUCKS_HUMAN          |
| Q02818               | Nucleobindin-1 precursor - Homo sapiens (Human)                                         | NUCB1_HUMAN          |
| P80303               | Nucleobindin-2 precursor - Homo sapiens (Human)                                         | NUCB2_HUMAN          |
| Q14978               | Nucleolar phosphoprotein p130 - Homo sapiens (Human)                                    | NOLC1_HUMAN          |
| O60936               | Nucleolar protein 3 - Homo sapiens (Human)                                              | NOL3_HUMAN           |
| Q9Y2X3               | Nucleolar protein 5 - Homo sapiens (Human)                                              | NOL5_HUMAN           |
| Q9NR30               | Nucleolar RNA helicase 2 - Homo sapiens (Human)                                         | DDX21_HUMAN          |
| P52594               | Nucleoporin-like protein RIP - Homo sapiens (Human)                                     | NUPL_HUMAN           |
| P55209               | Nucleosome assembly protein 1-like 1 - Homo sapiens (Human)                             | NP1L1_HUMAN          |
| Q99733               | Nucleosome assembly protein 1-like 4 - Homo sapiens (Human)                             | NP1L4_HUMAN          |
| Q96NT1               | Nucleosome assembly protein 1-like 5 - Homo sapiens (Human)                             | Q96NT1_HUMAN         |
| Q96CV9               | Optineurin - Homo sapiens (Human)                                                       | OPTN_HUMAN           |
| Q92882               | Osteoclast-stimulating factor 1 - Homo sapiens (Human)                                  | OSTF1_HUMAN          |
| P10451               | Osteopontin precursor - Homo sapiens (Human)                                            | OSTP_HUMAN           |
| Q01804               | OTU domain-containing protein 4 - Homo sapiens (Human)                                  | OTUD4_HUMAN          |
| Q8N573               | Oxidation resistance protein 1 - Homo sapiens (Human)                                   | OXR1_HUMAN           |
| Q12771               | P37 AUF1 - Homo sapiens (Human)                                                         | Q12771_HUMAN         |
| Q9NP74               | Palmdelphin - Homo sapiens (Human)                                                      | PALMD_HUMAN          |
| O75781               | Paralemmin - Homo sapiens (Human)                                                       | PALM_HUMAN           |
| Q8WXF1               | Paraspeckle component 1 - Homo sapiens (Human)                                          | PSPC1_HUMAN          |
| P20962               | Parathyrosin - Homo sapiens (Human)                                                     | PTMS_HUMAN           |
| O00151               | PDZ and LIM domain protein 1 - Homo sapiens (Human)                                     | PDL1_HUMAN           |
| Q96JY6               | PDZ and LIM domain protein 2 - Homo sapiens (Human)                                     | PDLI2_HUMAN          |
| Q96HC4               | PDZ and LIM domain protein 5 - Homo sapiens (Human)                                     | PDLI5_HUMAN          |
| Q9NR12               | PDZ and LIM domain protein 7 - Homo sapiens (Human)                                     | PDLI7_HUMAN          |
| Q5T2W1               | PDZ domain-containing protein 1 - Homo sapiens (Human)                                  | PDZD1_HUMAN          |
| Q5EBL8               | PDZ domain-containing protein 11 - Homo sapiens (Human)                                 | PDZ11_HUMAN          |
| O15018               | PDZ domain-containing protein 2 - Homo sapiens (Human)                                  | PDZD2_HUMAN          |
| O14908               | PDZ domain-containing protein GIPC1 - Homo sapiens (Human)                              | GIPC1_HUMAN          |
| Q13113               | PDZK1-interacting protein 1 - Homo sapiens (Human)                                      | PDZ11_HUMAN          |
| Q6IBH5               | Peptidyl-prolyl cis-trans isomerase - Homo sapiens (Human)                              | Q6IBH5_HUMAN         |
| Q13526               | Peptidyl-prolyl cis-trans isomerase NIMA-interacting 1 - Homo sapiens (Human)           | PIN1_HUMAN           |

| <i>Accession No*</i> | <i>Protein Name*</i>                                                              | <i>Reference No*</i> |
|----------------------|-----------------------------------------------------------------------------------|----------------------|
| Q13356               | Peptidyl-prolyl cis-trans isomerase-like 2 - Homo sapiens (Human)                 | PPIL2_HUMAN          |
| Q15154               | Pericentriolar material 1 protein - Homo sapiens (Human)                          | PCM1_HUMAN           |
| Q8NEY8               | Periphilin-1 - Homo sapiens (Human)                                               | PPHLN_HUMAN          |
| O60437               | Periplakin - Homo sapiens (Human)                                                 | PEPL_HUMAN           |
| Q06830               | Peroxiredoxin-1 - Homo sapiens (Human)                                            | PRDX1_HUMAN          |
| P32119               | Peroxiredoxin-2 - Homo sapiens (Human)                                            | PRDX2_HUMAN          |
| Q13162               | Peroxiredoxin-4 - Homo sapiens (Human)                                            | PRDX4_HUMAN          |
| P30044               | Peroxiredoxin-5, mitochondrial precursor - Homo sapiens (Human)                   | PRDX5_HUMAN          |
| O75381               | Peroxisomal membrane protein PEX14 - Homo sapiens (Human)                         | PEX14_HUMAN          |
| P50542               | Peroxisomal targeting signal 1 receptor - Homo sapiens (Human)                    | PEX5_HUMAN           |
| Q6Y7W6               | PERQ amino acid-rich with GYF domain-containing protein 2 - Homo sapiens (Hum     | PERQ2_HUMAN          |
| O00541               | Pescadillo homolog 1 - Homo sapiens (Human)                                       | PESC_HUMAN           |
| Q8WW12               | PEST proteolytic signal-containing nuclear protein - Homo sapiens (Human)         | PCNP_HUMAN           |
| Q92576               | PHD finger protein 3 - Homo sapiens (Human)                                       | PHF3_HUMAN           |
| O75167               | Phosphatase and actin regulator 2 - Homo sapiens (Human)                          | PHAR2_HUMAN          |
| Q8IZ21               | Phosphatase and actin regulator 4 - Homo sapiens (Human)                          | PHAR4_HUMAN          |
| P30086               | Phosphatidylethanolamine-binding protein 1 - Homo sapiens (Human)                 | PEBP1_HUMAN          |
| Q6VY07               | Phosphofurin acidic cluster sorting protein 1 - Homo sapiens (Human)              | PACS1_HUMAN          |
| Q86VP3               | Phosphofurin acidic cluster sorting protein 2 - Homo sapiens (Human)              | PACS2_HUMAN          |
| P00558               | Phosphoglycerate kinase 1 - Homo sapiens (Human)                                  | PGK1_HUMAN           |
| Q9NWQ8               | Phosphoprotein associated with glycosphingolipid-enriched microdomains 1 - Homo   | PAG1_HUMAN           |
| Q9H307               | Pinin - Homo sapiens (Human)                                                      | PININ_HUMAN          |
| P05154               | Plasma serine protease inhibitor precursor - Homo sapiens (Human)                 | IPSP_HUMAN           |
| Q8NC51               | Plasminogen activator inhibitor 1 RNA-binding protein - Homo sapiens (Human)      | PAIRB_HUMAN          |
| P00747               | Plasminogen precursor - Homo sapiens (Human)                                      | PLMN_HUMAN           |
| P02775               | Platelet basic protein precursor - Homo sapiens (Human)                           | SCYB7_HUMAN          |
| P16284               | Platelet endothelial cell adhesion molecule precursor - Homo sapiens (Human)      | PECA1_HUMAN          |
| P68402               | Platelet-activating factor acetylhydrolase IB subunit beta - Homo sapiens (Human) | PA1B2_HUMAN          |
| Q9HB21               | Pleckstrin homology domain-containing family A member 1 - Homo sapiens (Human)    | PKHA1_HUMAN          |
| Q9HAU0               | Pleckstrin homology domain-containing family A member 5 - Homo sapiens (Human)    | PKHA5_HUMAN          |
| Q6IQ23               | Pleckstrin homology domain-containing family A member 7 - Homo sapiens (Human)    | PKHA7_HUMAN          |
| Q86UU1               | Pleckstrin homology-like domain family B member 1 - Homo sapiens (Human)          | PHLB1_HUMAN          |
| Q86SQ0               | Pleckstrin homology-like domain family B member 2 - Homo sapiens (Human)          | PHLB2_HUMAN          |



| <i>Accession No*</i> | <i>Protein Name*</i>                                                        | <i>Reference No*</i> |
|----------------------|-----------------------------------------------------------------------------|----------------------|
| Q43660               | Pleiotropic regulator 1 - Homo sapiens (Human)                              | PLRG1_HUMAN          |
| Q96QH2               | PML-RARA-regulated adapter molecule 1 - Homo sapiens (Human)                | PRAM_HUMAN           |
| Q15223               | Poliovirus receptor-related protein 1 precursor - Homo sapiens (Human)      | PVRL1_HUMAN          |
| P09874               | Poly [ADP-ribose] polymerase 1 - Homo sapiens (Human)                       | PARP1_HUMAN          |
| Q460N5               | Poly [ADP-ribose] polymerase 14 - Homo sapiens (Human)                      | PAR14_HUMAN          |
| P11940               | Polyadenylate-binding protein 1 - Homo sapiens (Human)                      | PABP1_HUMAN          |
| Q86U42               | Polyadenylate-binding protein 2 - Homo sapiens (Human)                      | PABP2_HUMAN          |
| Q13563               | Polycystin-2 - Homo sapiens (Human)                                         | PKD2_HUMAN           |
| O60828               | Polyglutamine-binding protein 1 - Homo sapiens (Human)                      | PQBP1_HUMAN          |
| Q6NZI2               | Polymerase I and transcript release factor - Homo sapiens (Human)           | PTRF_HUMAN           |
| O60925               | Prefoldin subunit 1 - Homo sapiens (Human)                                  | PFD1_HUMAN           |
| Q9UHV9               | Prefoldin subunit 2 - Homo sapiens (Human)                                  | PFD2_HUMAN           |
| P61758               | Prefoldin subunit 3 - Homo sapiens (Human)                                  | PFD3_HUMAN           |
| Q9NQP4               | Prefoldin subunit 4 - Homo sapiens (Human)                                  | PFD4_HUMAN           |
| O15212               | Prefoldin subunit 6 - Homo sapiens (Human)                                  | PFD6_HUMAN           |
| Q6UN15               | Pre-mRNA 3'-end-processing factor FIP1 - Homo sapiens (Human)               | FIP1_HUMAN           |
| O94913               | Pre-mRNA cleavage complex 2 protein Pcf11 - Homo sapiens (Human)            | PCF11_HUMAN          |
| Q92620               | Pre-mRNA-splicing factor ATP-dependent RNA helicase PRP16 - Homo sapiens (H | PRP16_HUMAN          |
| O95926               | Pre-mRNA-splicing factor SYF2 - Homo sapiens (Human)                        | SYF2_HUMAN           |
| Q969E8               | Pre-rRNA-processing protein TSR2 homolog - Homo sapiens (Human)             | TSR2_HUMAN           |
| Q96IZ0               | PRKC apoptosis WT1 regulator protein - Homo sapiens (Human)                 | PAWR_HUMAN           |
| Q96CF8               | PRKR interacting protein 1 - Homo sapiens (Human)                           | Q96CF8_HUMAN         |
| Q92841               | Probable ATP-dependent RNA helicase DDX17 - Homo sapiens (Human)            | DDX17_HUMAN          |
| Q9BUQ8               | Probable ATP-dependent RNA helicase DDX23 - Homo sapiens (Human)            | DDX23_HUMAN          |
| P26196               | Probable ATP-dependent RNA helicase DDX6 - Homo sapiens (Human)             | DDX6_HUMAN           |
| Q7Z333               | Probable helicase senataxin - Homo sapiens (Human)                          | SETX_HUMAN           |
| Q9C0B5               | Probable palmitoyltransferase ZDHHC5 - Homo sapiens (Human)                 | ZDHC5_HUMAN          |
| Q99848               | Probable rRNA-processing protein EBP2 - Homo sapiens (Human)                | EBP2_HUMAN           |
| P07737               | Profilin-1 - Homo sapiens (Human)                                           | PROF1_HUMAN          |
| O14737               | Programmed cell death protein 5 - Homo sapiens (Human)                      | PDCD5_HUMAN          |
| Q9NSV0               | Proline-rich protein 8 - Homo sapiens (Human)                               | PRR8_HUMAN           |
| Q92733               | Proline-rich protein PRCC - Homo sapiens (Human)                            | PRCC_HUMAN           |
| P13674               | Prolyl 4-hydroxylase subunit alpha-1 precursor - Homo sapiens (Human)       | P4HA1_HUMAN          |

| <i>Accession No*</i> | <i>Protein Name*</i>                                            | <i>Reference No*</i> |
|----------------------|-----------------------------------------------------------------|----------------------|
| Q15185               | Prostaglandin E synthase 3 - Homo sapiens (Human)               | TEBP_HUMAN           |
| Q06323               | Proteasome activator complex subunit 1 - Homo sapiens (Human)   | PSME1_HUMAN          |
| P25786               | Proteasome subunit alpha type 1 - Homo sapiens (Human)          | PSA1_HUMAN           |
| P28070               | Proteasome subunit beta type 4 precursor - Homo sapiens (Human) | PSB4_HUMAN           |
| P28072               | Proteasome subunit beta type 6 precursor - Homo sapiens (Human) | PSB6_HUMAN           |
| P11171               | Protein 4.1 - Homo sapiens (Human)                              | 41_HUMAN             |
| Q16186               | Protein ADRM1 - Homo sapiens (Human)                            | ADRM1_HUMAN          |
| Q9HCF4               | Protein ALO17 - Homo sapiens (Human)                            | ALO17_HUMAN          |
| P55145               | Protein ARMET precursor - Homo sapiens (Human)                  | ARMET_HUMAN          |
| Q8N129               | PRotein Associated with Tlr4 - Homo sapiens (Human)             | Q8N129_HUMAN         |
| Q9H694               | Protein bicaudal C homolog 1 - Homo sapiens (Human)             | BICC1_HUMAN          |
| Q8TD16               | Protein bicaudal D homolog 2 - Homo sapiens (Human)             | BICD2_HUMAN          |
| Q99622               | Protein C10 - Homo sapiens (Human)                              | C10_HUMAN            |
| Q9NWU2               | Protein C20orf11 - Homo sapiens (Human)                         | CT011_HUMAN          |
| O15234               | Protein CASC3 - Homo sapiens (Human)                            | CASC3_HUMAN          |
| O60888               | Protein CutA precursor - Homo sapiens (Human)                   | CUTA_HUMAN           |
| Q9P013               | Protein CWC15 homolog - Homo sapiens (Human)                    | CWC15_HUMAN          |
| P35659               | Protein DEK - Homo sapiens (Human)                              | DEK_HUMAN            |
| Q96DF8               | Protein DGCR14 - Homo sapiens (Human)                           | DGC14_HUMAN          |
| P30101               | Protein disulfide-isomerase A3 precursor - Homo sapiens (Human) | PDIA3_HUMAN          |
| P13667               | Protein disulfide-isomerase A4 precursor - Homo sapiens (Human) | PDIA4_HUMAN          |
| Q15084               | Protein disulfide-isomerase A6 precursor - Homo sapiens (Human) | PDIA6_HUMAN          |
| P07237               | Protein disulfide-isomerase precursor - Homo sapiens (Human)    | PDIA1_HUMAN          |
| Q99497               | Protein DJ-1 - Homo sapiens (Human)                             | PARK7_HUMAN          |
| Q9BTL3               | Protein FAM103A1 - Homo sapiens (Human)                         | F103A_HUMAN          |
| Q1W6H9               | Protein FAM110C - Homo sapiens (Human)                          | F110C_HUMAN          |
| Q96E09               | Protein FAM122A - Homo sapiens (Human)                          | F122A_HUMAN          |
| Q8IXS8               | Protein FAM126B - Homo sapiens (Human)                          | F126B_HUMAN          |
| Q9Y4E1               | Protein FAM21C - Homo sapiens (Human)                           | FA21C_HUMAN          |
| Q9Y421               | Protein FAM32A - Homo sapiens (Human)                           | FA32A_HUMAN          |
| Q8NFC6               | Protein FAM44A - Homo sapiens (Human)                           | FA44A_HUMAN          |
| Q14320               | Protein FAM50A - Homo sapiens (Human)                           | FA50A_HUMAN          |
| Q5HYJ3               | Protein FAM76B - Homo sapiens (Human)                           | FA76B_HUMAN          |

| <i>Accession No*</i> | <i>Protein Name*</i>                                                               | <i>Reference No*</i> |
|----------------------|------------------------------------------------------------------------------------|----------------------|
| Q6ZRV2               | Protein FAM83H - Homo sapiens (Human)                                              | Q6ZRV2_HUMAN         |
| Q9Y4F5               | Protein KIAA0284 - Homo sapiens (Human)                                            | K0284_HUMAN          |
| Q9UPP5               | Protein KIAA1107 - Homo sapiens (Human)                                            | Q9UPP5_HUMAN         |
| Q9P206               | Protein KIAA1522 - Homo sapiens (Human)                                            | Q9P206_HUMAN         |
| Q9UNF0               | Protein kinase C and casein kinase substrate in neurons protein 2 - Homo sapiens ( | PACN2_HUMAN          |
| Q96RT1               | Protein LAP2 - Homo sapiens (Human)                                                | LAP2_HUMAN           |
| Q14160               | Protein LAP4 - Homo sapiens (Human)                                                | LAP4_HUMAN           |
| Q96GA3               | Protein LTV1 homolog. - Homo sapiens (Human)                                       | Q96GA3_HUMAN         |
| Q86UE4               | Protein LYRIC - Homo sapiens (Human)                                               | LYRIC_HUMAN          |
| Q8WZA0               | Protein LZIC - Homo sapiens (Human)                                                | LZIC_HUMAN           |
| P61244               | Protein max - Homo sapiens (Human)                                                 | MAX_HUMAN            |
| Q8NHV4               | Protein NEDD1 - Homo sapiens (Human)                                               | NEDD1_HUMAN          |
| P49757               | Protein numb homolog - Homo sapiens (Human)                                        | NUMB_HUMAN           |
| O60927               | Protein phosphatase 1 regulatory subunit 11 - Homo sapiens (Human)                 | PP1RB_HUMAN          |
| O14974               | Protein phosphatase 1 regulatory subunit 12A - Homo sapiens (Human)                | MYPT1_HUMAN          |
| O60237               | Protein phosphatase 1 regulatory subunit 12B - Homo sapiens (Human)                | MYPT2_HUMAN          |
| Q9BZL4               | Protein phosphatase 1 regulatory subunit 12C - Homo sapiens (Human)                | Q9BZL4_HUMAN         |
| Q96A00               | Protein phosphatase 1 regulatory subunit 14A - Homo sapiens (Human)                | PP14A_HUMAN          |
| Q8TAE6               | Protein phosphatase 1 regulatory subunit 14C - Homo sapiens (Human)                | PP14C_HUMAN          |
| O15355               | Protein phosphatase 1G - Homo sapiens (Human)                                      | PPM1G_HUMAN          |
| Q13123               | Protein Red - Homo sapiens (Human)                                                 | RED_HUMAN            |
| P60903               | Protein S100-A10 - Homo sapiens (Human)                                            | S10AA_HUMAN          |
| P31949               | Protein S100-A11 - Homo sapiens (Human)                                            | S10AB_HUMAN          |
| Q99584               | Protein S100-A13 - Homo sapiens (Human)                                            | S10AD_HUMAN          |
| P06702               | Protein S100-A9 - Homo sapiens (Human)                                             | S10A9_HUMAN          |
| Q01105               | Protein SET - Homo sapiens (Human)                                                 | SET_HUMAN            |
| Q9ULL8               | Protein Shroom4 - Homo sapiens (Human)                                             | SHRM4_HUMAN          |
| Q6PL24               | Protein TMED8 - Homo sapiens (Human)                                               | TMED8_HUMAN          |
| O94979               | Protein transport protein Sec31A - Homo sapiens (Human)                            | SC31A_HUMAN          |
| Q9Y5U2               | Protein TSSC4 - Homo sapiens (Human)                                               | TSSC4_HUMAN          |
| Q9BRP8               | Protein wibg homolog - Homo sapiens (Human)                                        | WIBG_HUMAN           |
| Q9UK55               | Protein Z-dependent protease inhibitor precursor - Homo sapiens (Human)            | ZPI_HUMAN            |
| P22061               | Protein-L-isoaspartate(D-aspartate) O-methyltransferase - Homo sapiens (Human)     | PIMT_HUMAN           |

| <i>Accession No*</i> | <i>Protein Name*</i>                                                            | <i>Reference No*</i> |
|----------------------|---------------------------------------------------------------------------------|----------------------|
| P00734               | Prothrombin precursor - Homo sapiens (Human)                                    | THRB_HUMAN           |
| Q9UMZ1               | Prothymosin a14 - Homo sapiens (Human)                                          | Q9UMZ1_HUMAN         |
| P46108               | Proto-oncogene C-crk - Homo sapiens (Human)                                     | CRK_HUMAN            |
| P00519               | Proto-oncogene tyrosine-protein kinase ABL1 - Homo sapiens (Human)              | ABL1_HUMAN           |
| P61457               | Pterin-4-alpha-carbinolamine dehydratase - Homo sapiens (Human)                 | PHS_HUMAN            |
| O43865               | Putative adenosylhomocysteinase 2 - Homo sapiens (Human)                        | SAHH2_HUMAN          |
| Q7Z478               | Putative ATP-dependent RNA helicase DHX29 - Homo sapiens (Human)                | DHX29_HUMAN          |
| Q7Z422               | Putative MAPK activating protein - Homo sapiens (Human)                         | Q7Z422_HUMAN         |
| Q96T37               | Putative RNA-binding protein 15 - Homo sapiens (Human)                          | RBM15_HUMAN          |
| P98179               | Putative RNA-binding protein 3 - Homo sapiens (Human)                           | RBM3_HUMAN           |
| Q8IY81               | Putative rRNA methyltransferase 3 - Homo sapiens (Human)                        | RRMJ3_HUMAN          |
| Q8NFU3               | Putative thiosulfate sulfurtransferase KAT - Homo sapiens (Human)               | KAT_HUMAN            |
| Q05DR4               | Putative uncharacterized protein - Homo sapiens (Human)                         | Q05DR4_HUMAN         |
| Q05DE8               | Putative uncharacterized protein - Homo sapiens (Human)                         | Q05DE8_HUMAN         |
| Q05CP8               | Putative uncharacterized protein - Homo sapiens (Human)                         | Q05CP8_HUMAN         |
| Q9Y520               | Putative uncharacterized protein - Homo sapiens (Human)                         | Q9Y520_HUMAN         |
| Q9NSM8               | Putative uncharacterized protein DKFZp434M1616 - Homo sapiens (Human)           | Q9NSM8_HUMAN         |
| Q5JXL8               | Putative uncharacterized protein DKFZp564G0422 - Homo sapiens (Human)           | Q5JXL8_HUMAN         |
| Q5HYK7               | Putative uncharacterized protein DKFZp686I04144 - Homo sapiens (Human)          | Q5HYK7_HUMAN         |
| Q7L8J4               | Putative uncharacterized protein DKFZp761F0123 - Homo sapiens (Human)           | Q7L8J4_HUMAN         |
| Q96CP2               | Putative uncharacterized protein LOC114984 - Homo sapiens (Human)               | Q96CP2_HUMAN         |
| Q8WU39               | Putative uncharacterized protein MGC29506 - Homo sapiens (Human)                | Q8WU39_HUMAN         |
| Q7Z7A4               | PX domain-containing protein kinase-like protein - Homo sapiens (Human)         | PXK_HUMAN            |
| Q6P996               | Pyridoxal-dependent decarboxylase domain-containing protein 1 - Homo sapiens (H | PDXD1_HUMAN          |
| P14618               | Pyruvate kinase isozymes M1/M2 - Homo sapiens (Human)                           | KPYM_HUMAN           |
| Q15276               | Rab GTPase-binding effector protein 1 - Homo sapiens (Human)                    | RABE1_HUMAN          |
| Q6WKZ4               | Rab11 family-interacting protein 1 - Homo sapiens (Human)                       | RFIP1_HUMAN          |
| O75154               | Rab11 family-interacting protein 3 - Homo sapiens (Human)                       | RFIP3_HUMAN          |
| Q9BXF6               | Rab11 family-interacting protein 5 - Homo sapiens (Human)                       | RFIP5_HUMAN          |
| Q9H1K0               | Rabenosyn-5 - Homo sapiens (Human)                                              | RBNS5_HUMAN          |
| P35241               | Radixin - Homo sapiens (Human)                                                  | RADI_HUMAN           |
| Q9H6Z4               | Ran-binding protein 3 - Homo sapiens (Human)                                    | RANB3_HUMAN          |
| P43487               | Ran-specific GTPase-activating protein - Homo sapiens (Human)                   | RANG_HUMAN           |

| <i>Accession No*</i> | <i>Protein Name*</i>                                                                       | <i>Reference No*</i> |
|----------------------|--------------------------------------------------------------------------------------------|----------------------|
| Q9Y4G8               | Rap guanine nucleotide exchange factor 2 - Homo sapiens (Human)                            | RPGF2_HUMAN          |
| Q13283               | Ras GTPase-activating protein-binding protein 1 - Homo sapiens (Human)                     | G3BP1_HUMAN          |
| Q9UN86               | Ras GTPase-activating protein-binding protein 2 - Homo sapiens (Human)                     | G3BP2_HUMAN          |
| P46940               | Ras GTPase-activating-like protein IQGAP1 - Homo sapiens (Human)                           | IQGA1_HUMAN          |
| Q70E73               | Ras-associated and pleckstrin homology domains-containing protein 1 - Homo sapiens (Human) | RAPH1_HUMAN          |
| Q5U651               | Ras-interacting protein 1 - Homo sapiens (Human)                                           | RAIN_HUMAN           |
| O43353               | Receptor-interacting serine/threonine-protein kinase 2 - Homo sapiens (Human)              | RIPK2_HUMAN          |
| O43665               | Regulator of G-protein signaling 10 - Homo sapiens (Human)                                 | RGS10_HUMAN          |
| Q9H1J1               | Regulator of nonsense transcripts 3A - Homo sapiens (Human)                                | REN3A_HUMAN          |
| Q9BZI7               | Regulator of nonsense transcripts 3B - Homo sapiens (Human)                                | REN3B_HUMAN          |
| Q96T23               | Remodeling and spacing factor 1 - Homo sapiens (Human)                                     | RSF1_HUMAN           |
| P35251               | Replication factor C subunit 1 - Homo sapiens (Human)                                      | RFC1_HUMAN           |
| Q9H4X1               | Response gene to complement 32 protein - Homo sapiens (Human)                              | RGC32_HUMAN          |
| Q15293               | Reticulocalbin-1 precursor - Homo sapiens (Human)                                          | RCN1_HUMAN           |
| Q14257               | Reticulocalbin-2 precursor - Homo sapiens (Human)                                          | RCN2_HUMAN           |
| Q96D15               | Reticulocalbin-3 precursor - Homo sapiens (Human)                                          | RCN3_HUMAN           |
| Q16799               | Reticulon-1 - Homo sapiens (Human)                                                         | RTN1_HUMAN           |
| Q7Z6E9               | Retinoblastoma-binding protein 6 - Homo sapiens (Human)                                    | RBBP6_HUMAN          |
| P52565               | Rho GDP-dissociation inhibitor 1 - Homo sapiens (Human)                                    | GDIR_HUMAN           |
| P52566               | Rho GDP-dissociation inhibitor 2 - Homo sapiens (Human)                                    | GDIS_HUMAN           |
| Q68EM7               | Rho GTPase-activating protein 17 - Homo sapiens (Human)                                    | RHG17_HUMAN          |
| Q8N392               | Rho GTPase-activating protein 18 - Homo sapiens (Human)                                    | RHG18_HUMAN          |
| P42331               | Rho GTPase-activating protein 25 - Homo sapiens (Human)                                    | RHG25_HUMAN          |
| O15463               | Rho GTPase-activating protein 29 - Homo sapiens (Human)                                    | O15463_HUMAN         |
| Q7Z6I6               | Rho GTPase-activating protein 30 - Homo sapiens (Human)                                    | RHG30_HUMAN          |
| Q9NZN5               | Rho guanine nucleotide exchange factor 12 - Homo sapiens (Human)                           | ARHGC_HUMAN          |
| Q5VV41               | Rho guanine nucleotide exchange factor 16 - Homo sapiens (Human)                           | ARHGG_HUMAN          |
| Q96PE2               | Rho guanine nucleotide exchange factor 17 - Homo sapiens (Human)                           | ARHGH_HUMAN          |
| Q99575               | Ribonucleases P/MRP protein subunit POP1 - Homo sapiens (Human)                            | POP1_HUMAN           |
| Q9P2E9               | Ribosome-binding protein 1 - Homo sapiens (Human)                                          | RRBP1_HUMAN          |
| Q8N488               | RING1 and YY1-binding protein - Homo sapiens (Human)                                       | RYBP_HUMAN           |
| Q8WVC0               | RNA polymerase-associated protein LEO1 - Homo sapiens (Human)                              | LEO1_HUMAN           |
| Q9H814               | RNA U small nuclear RNA export adapter protein - Homo sapiens (Human)                      | RNUXA_HUMAN          |

| <i>Accession No*</i> | <i>Protein Name*</i>                                                                           | <i>Reference No*</i> |
|----------------------|------------------------------------------------------------------------------------------------|----------------------|
| Q96PK6               | RNA-binding protein 14 - Homo sapiens (Human)                                                  | RBM14_HUMAN          |
| Q5T8P6               | RNA-binding protein 26 - Homo sapiens (Human)                                                  | RBM26_HUMAN          |
| Q9P2N5               | RNA-binding protein 27 - Homo sapiens (Human)                                                  | RBM27_HUMAN          |
| Q9Y5S9               | RNA-binding protein 8A - Homo sapiens (Human)                                                  | RBM8A_HUMAN          |
| Q93062               | RNA-binding protein with multiple splicing - Homo sapiens (Human)                              | RBPM5_HUMAN          |
| Q15287               | RNA-binding protein with serine-rich domain 1 - Homo sapiens (Human)                           | RNPS1_HUMAN          |
| Q9Y3B9               | RRP15-like protein - Homo sapiens (Human)                                                      | RRP15_HUMAN          |
| P56182               | RRP1-like protein - Homo sapiens (Human)                                                       | RRP1_HUMAN           |
| Q9H446               | RWD domain-containing protein 1 - Homo sapiens (Human)                                         | RWDD1_HUMAN          |
| Q9Y3Z3               | SAM domain and HD domain-containing protein 1 - Homo sapiens (Human)                           | SAMH1_HUMAN          |
| Q9UHR5               | SAP30-binding protein - Homo sapiens (Human)                                                   | S30BP_HUMAN          |
| Q04323               | SAPK substrate protein 1 - Homo sapiens (Human)                                                | SAKS1_HUMAN          |
| Q5H9R7               | SAPS domain family member 3 - Homo sapiens (Human)                                             | SAPS3_HUMAN          |
| P23327               | Sarcoplasmic reticulum histidine-rich calcium-binding protein precursor - Homo sapiens (Human) | SRCH_HUMAN           |
| Q14151               | Scaffold attachment factor B2 - Homo sapiens (Human)                                           | SAFB2_HUMAN          |
| Q96GP6               | Scavenger receptor class F member 2 precursor - Homo sapiens (Human)                           | SREC2_HUMAN          |
| O15027               | SEC16 homolog A - Homo sapiens (Human)                                                         | SC16A_HUMAN          |
| O14641               | Segment polarity protein dishevelled homolog DVL-2 - Homo sapiens (Human)                      | DVL2_HUMAN           |
| Q13228               | Selenium-binding protein 1 - Homo sapiens (Human)                                              | SBP1_HUMAN           |
| Q8IZQ5               | Selenoprotein H - Homo sapiens (Human)                                                         | SELH_HUMAN           |
| Q16181               | Septin-7 - Homo sapiens (Human)                                                                | SEPT7_HUMAN          |
| Q9UHD8               | Septin-9 - Homo sapiens (Human)                                                                | SEPT9_HUMAN          |
| Q7Z5V7               | Serine arginine-rich pre-mRNA splicing factor SR-A1 - Homo sapiens (Human)                     | Q7Z5V7_HUMAN         |
| Q9UQ35               | Serine/arginine repetitive matrix protein 2 - Homo sapiens (Human)                             | SRRM2_HUMAN          |
| Q13188               | Serine/threonine-protein kinase 3 - Homo sapiens (Human)                                       | STK3_HUMAN           |
| Q8IWU2               | Serine/threonine-protein kinase LMTK2 precursor - Homo sapiens (Human)                         | LMTK2_HUMAN          |
| Q7KZI7               | Serine/threonine-protein kinase MARK2 - Homo sapiens (Human)                                   | MARK2_HUMAN          |
| Q9Y5S2               | Serine/threonine-protein kinase MRCK beta - Homo sapiens (Human)                               | MRCKB_HUMAN          |
| Q8TD19               | Serine/threonine-protein kinase Nek9 - Homo sapiens (Human)                                    | NEK9_HUMAN           |
| O95747               | Serine/threonine-protein kinase OSR1 - Homo sapiens (Human)                                    | OXSR1_HUMAN          |
| Q13153               | Serine/threonine-protein kinase PAK 1 - Homo sapiens (Human)                                   | PAK1_HUMAN           |
| O96013               | Serine/threonine-protein kinase PAK 4 - Homo sapiens (Human)                                   | PAK4_HUMAN           |
| Q9H4A3               | Serine/threonine-protein kinase WNK1 - Homo sapiens (Human)                                    | WNK1_HUMAN           |

| <i>Accession No*</i> | <i>Protein Name*</i>                                                                | <i>Reference No*</i> |
|----------------------|-------------------------------------------------------------------------------------|----------------------|
| Q96QC0               | Serine/threonine-protein phosphatase 1 regulatory subunit 10 - Homo sapiens (Hum    | PP1RA_HUMAN          |
| P53041               | Serine/threonine-protein phosphatase 5 - Homo sapiens (Human)                       | PPP5_HUMAN           |
| O60524               | Serologically defined colon cancer antigen 1 - Homo sapiens (Human)                 | SDCG1_HUMAN          |
| P50454               | Serpin H1 precursor - Homo sapiens (Human)                                          | SERPH_HUMAN          |
| Q8TCE1               | SERPINC1 protein - Homo sapiens (Human)                                             | Q8TCE1_HUMAN         |
| O95810               | Serum deprivation-response protein - Homo sapiens (Human)                           | SDPR_HUMAN           |
| Q8NEF9               | Serum response factor binding protein 1 - Homo sapiens (Human)                      | Q8NEF9_HUMAN         |
| Q86TU7               | SET domain-containing protein 3 - Homo sapiens (Human)                              | SETD3_HUMAN          |
| Q9UPX8               | SH3 and multiple ankyrin repeat domains protein 2 - Homo sapiens (Human)            | SHAN2_HUMAN          |
| Q9BYB0               | SH3 and multiple ankyrin repeat domains protein 3 - Homo sapiens (Human)            | SHAN3_HUMAN          |
| Q8WV41               | SH3 and PX domain containing 3 - Homo sapiens (Human)                               | Q8WV41_HUMAN         |
| Q5TCZ1               | SH3 and PX domain-containing protein 2A - Homo sapiens (Human)                      | SPD2A_HUMAN          |
| O75368               | SH3 domain-binding glutamic acid-rich-like protein - Homo sapiens (Human)           | SH3L1_HUMAN          |
| A0MZ66               | Shootin-1 - Homo sapiens (Human)                                                    | SHOT1_HUMAN          |
| Q5T5P2               | Sickle tail protein homolog - Homo sapiens (Human)                                  | SKT_HUMAN            |
| Q9H9B4               | Sideroflexin-1 - Homo sapiens (Human)                                               | SFXN1_HUMAN          |
| P37108               | Signal recognition particle 14 kDa protein - Homo sapiens (Human)                   | SRP14_HUMAN          |
| P09132               | Signal recognition particle 19 kDa protein - Homo sapiens (Human)                   | SRP19_HUMAN          |
| O76094               | Signal recognition particle 72 kDa protein - Homo sapiens (Human)                   | SRP72_HUMAN          |
| P08240               | Signal recognition particle receptor subunit alpha - Homo sapiens (Human)           | SRPR_HUMAN           |
| P42224               | Signal transducer and activator of transcription 1-alpha/beta - Homo sapiens (Huma  | STAT1_HUMAN          |
| P52630               | Signal transducer and activator of transcription 2 - Homo sapiens (Human)           | STAT2_HUMAN          |
| O43166               | Signal-induced proliferation-associated 1-like protein 1 - Homo sapiens (Human)     | SI1L1_HUMAN          |
| Q96FS4               | Signal-induced proliferation-associated protein 1 - Homo sapiens (Human)            | SIPA1_HUMAN          |
| Q29RF7               | Sister chromatid cohesion protein PDS5 homolog A - Homo sapiens (Human)             | PDS5A_HUMAN          |
| Q9P270               | SLAIN motif family member 2 - Homo sapiens (Human)                                  | Q9P270_HUMAN         |
| Q7Z6B7               | SLIT-ROBO Rho GTPase-activating protein 1 - Homo sapiens (Human)                    | SRGP1_HUMAN          |
| O00193               | Small acidic protein - Homo sapiens (Human)                                         | SMAP_HUMAN           |
| P84101               | Small EDRK-rich factor 2 - Homo sapiens (Human)                                     | SERF2_HUMAN          |
| O43765               | Small glutamine-rich tetratricopeptide repeat-containing protein A - Homo sapiens ( | SGTA_HUMAN           |
| P62306               | Small nuclear ribonucleoprotein F - Homo sapiens (Human)                            | RUXF_HUMAN           |
| P61956               | Small ubiquitin-related modifier 2 precursor - Homo sapiens (Human)                 | SUMO2_HUMAN          |
| P55854               | Small ubiquitin-related modifier 3 precursor - Homo sapiens (Human)                 | SUMO3_HUMAN          |

| <i>Accession No*</i> | <i>Protein Name*</i>                                                             | <i>Reference No*</i> |
|----------------------|----------------------------------------------------------------------------------|----------------------|
| Q13573               | SNW domain-containing protein 1 - Homo sapiens (Human)                           | SNW1_HUMAN           |
| P55011               | Solute carrier family 12 member 2 - Homo sapiens (Human)                         | S12A2_HUMAN          |
| P18583               | SON protein - Homo sapiens (Human)                                               | SON_HUMAN            |
| O60749               | Sorting nexin-2 - Homo sapiens (Human)                                           | SNX2_HUMAN           |
| O60493               | Sorting nexin-3 - Homo sapiens (Human)                                           | SNX3_HUMAN           |
| P09486               | SPARC precursor - Homo sapiens (Human)                                           | SPRC_HUMAN           |
| Q14515               | SPARC-like protein 1 precursor - Homo sapiens (Human)                            | SPRL1_HUMAN          |
| Q9UBP0               | Spastin - Homo sapiens (Human)                                                   | SPAST_HUMAN          |
| Q13813               | Spectrin alpha chain, brain - Homo sapiens (Human)                               | SPTA2_HUMAN          |
| Q01082               | Spectrin beta chain, brain 1 - Homo sapiens (Human)                              | SPTB2_HUMAN          |
| Q5M775               | Sperm antigen with calponin homology and coiled-coil domains 1 - Homo sapiens (  | SPEC1_HUMAN          |
| Q07617               | Sperm-associated antigen 1 - Homo sapiens (Human)                                | SPAG1_HUMAN          |
| O75391               | Sperm-associated antigen 7 - Homo sapiens (Human)                                | SPAG7_HUMAN          |
| Q86XZ4               | Spermatogenesis-associated serine-rich protein 2. - Homo sapiens (Human)         | Q86XZ4_HUMAN         |
| P28290               | Sperm-specific antigen 2 - Homo sapiens (Human)                                  | SSFA2_HUMAN          |
| P63208               | S-phase kinase-associated protein 1A - Homo sapiens (Human)                      | SKP1_HUMAN           |
| Q15637               | Splicing factor 1 - Homo sapiens (Human)                                         | SF01_HUMAN           |
| O75533               | Splicing factor 3B subunit 1 - Homo sapiens (Human)                              | SF3B1_HUMAN          |
| Q13435               | Splicing factor 3B subunit 2 - Homo sapiens (Human)                              | SF3B2_HUMAN          |
| Q8IWZ8               | Splicing factor 4 - Homo sapiens (Human)                                         | SF04_HUMAN           |
| Q07955               | Splicing factor, arginine/serine-rich 1 - Homo sapiens (Human)                   | SFRS1_HUMAN          |
| O95104               | Splicing factor, arginine/serine-rich 15 - Homo sapiens (Human)                  | SFR15_HUMAN          |
| Q8N2M8               | Splicing factor, arginine/serine-rich 16 - Homo sapiens (Human)                  | SFR16_HUMAN          |
| Q01130               | Splicing factor, arginine/serine-rich 2 - Homo sapiens (Human)                   | SFRS2_HUMAN          |
| Q9BRL6               | Splicing factor, arginine/serine-rich 2B - Homo sapiens (Human)                  | Q9BRL6_HUMAN         |
| P84103               | Splicing factor, arginine/serine-rich 3 - Homo sapiens (Human)                   | SFRS3_HUMAN          |
| Q08170               | Splicing factor, arginine/serine-rich 4 - Homo sapiens (Human)                   | SFRS4_HUMAN          |
| Q13243               | Splicing factor, arginine/serine-rich 5 - Homo sapiens (Human)                   | SFRS5_HUMAN          |
| Q16629               | Splicing factor, arginine/serine-rich 7 - Homo sapiens (Human)                   | SFRS7_HUMAN          |
| Q13242               | Splicing factor, arginine/serine-rich 9 - Homo sapiens (Human)                   | SFRS9_HUMAN          |
| P23246               | Splicing factor, proline- and glutamine-rich - Homo sapiens (Human)              | SFPQ_HUMAN           |
| Q15020               | Squamous cell carcinoma antigen recognized by T-cells 3 - Homo sapiens (Human)   | SART3_HUMAN          |
| Q9GZT3               | SRA stem-loop-interacting RNA-binding protein, mitochondrial precursor - Homo sa | SLIRP_HUMAN          |



| <i>Accession No*</i> | <i>Protein Name*</i>                                                              | <i>Reference No*</i> |
|----------------------|-----------------------------------------------------------------------------------|----------------------|
| Q14247               | Src substrate cortactin - Homo sapiens (Human)                                    | SRC8_HUMAN           |
| P16949               | Stathmin - Homo sapiens (Human)                                                   | STMN1_HUMAN          |
| Q9NZ72               | Stathmin-3 - Homo sapiens (Human)                                                 | STMN3_HUMAN          |
| Q9H2G2               | STE20-like serine/threonine-protein kinase - Homo sapiens (Human)                 | SLK_HUMAN            |
| Q8IZD0               | Sterile alpha motif domain-containing protein 14 - Homo sapiens (Human)           | SAM14_HUMAN          |
| Q5K651               | Sterile alpha motif domain-containing protein 9 - Homo sapiens (Human)            | SAMD9_HUMAN          |
| Q9HD15               | Steroid receptor RNA activator 1 - Homo sapiens (Human)                           | SRA1_HUMAN           |
| Q9UNE7               | STIP1 homology and U box-containing protein 1 - Homo sapiens (Human)              | STUB1_HUMAN          |
| P38646               | Stress-70 protein, mitochondrial precursor - Homo sapiens (Human)                 | GRP75_HUMAN          |
| P31948               | Stress-induced-phosphoprotein 1 - Homo sapiens (Human)                            | STIP1_HUMAN          |
| Q13586               | Stromal interaction molecule 1 precursor - Homo sapiens (Human)                   | STIM1_HUMAN          |
| Q8NBJ7               | Sulfatase-modifying factor 2 precursor - Homo sapiens (Human)                     | SUMF2_HUMAN          |
| P00441               | Superoxide dismutase [Cu-Zn] - Homo sapiens (Human)                               | SODC_HUMAN           |
| O95425               | Supervillin - Homo sapiens (Human)                                                | SVIL_HUMAN           |
| O75940               | Survival of motor neuron-related-splicing factor 30 - Homo sapiens (Human)        | SPF30_HUMAN          |
| Q9NZC9               | SWI/SNF-related matrix-associated actin-dependent regulator of chromatin subfamil | SMAL1_HUMAN          |
| Q8N3V7               | Synaptopodin - Homo sapiens (Human)                                               | SYNPO_HUMAN          |
| Q9UMS6               | Synaptopodin-2 - Homo sapiens (Human)                                             | SYNP2_HUMAN          |
| O00161               | Synaptosomal-associated protein 23 - Homo sapiens (Human)                         | SNP23_HUMAN          |
| O95721               | Synaptosomal-associated protein 29 - Homo sapiens (Human)                         | SNP29_HUMAN          |
| Q9HCH5               | Synaptotagmin-like protein 2 - Homo sapiens (Human)                               | SYTL2_HUMAN          |
| P31431               | Syndecan-4 precursor - Homo sapiens (Human)                                       | SDC4_HUMAN           |
| Q13277               | Syntaxin-3 - Homo sapiens (Human)                                                 | STX3_HUMAN           |
| O15400               | Syntaxin-7 - Homo sapiens (Human)                                                 | STX7_HUMAN           |
| Q9Y490               | Talin-1 - Homo sapiens (Human)                                                    | TLN1_HUMAN           |
| Q86X74               | Target of myb1 - Homo sapiens (Human)                                             | Q86X74_HUMAN         |
| P82094               | TATA element modulatory factor - Homo sapiens (Human)                             | TMF1_HUMAN           |
| Q92804               | TATA-binding protein-associated factor 2N - Homo sapiens (Human)                  | RBP56_HUMAN          |
| Q92609               | TBC1 domain family member 5 - Homo sapiens (Human)                                | TBCD5_HUMAN          |
| P06729               | T-cell surface antigen CD2 precursor - Homo sapiens (Human)                       | CD2_HUMAN            |
| Q9NYB0               | Telomeric repeat-binding factor 2-interacting protein 1 - Homo sapiens (Human)    | TE2IP_HUMAN          |
| P24821               | Tenascin precursor - Homo sapiens (Human)                                         | TENA_HUMAN           |
| Q9HBL0               | Tensin-1 - Homo sapiens (Human)                                                   | TENS1_HUMAN          |

| <i>Accession No*</i> | <i>Protein Name*</i>                                                                                 | <i>Reference No*</i> |
|----------------------|------------------------------------------------------------------------------------------------------|----------------------|
| Q68CZ2               | Tensin-3 - Homo sapiens (Human)                                                                      | TENS3_HUMAN          |
| Q63HR2               | Tensin-like C1 domain-containing phosphatase - Homo sapiens (Human)                                  | TENC1_HUMAN          |
| Q9H0U9               | Testis-specific Y-encoded-like protein 1 - Homo sapiens (Human)                                      | TSYL1_HUMAN          |
| Q99614               | Tetratricopeptide repeat protein 1 - Homo sapiens (Human)                                            | TTC1_HUMAN           |
| Q9C0D5               | Tetratricopeptide repeat, ankyrin repeat and coiled-coil-containing protein 1 - Homo sapiens (Human) | Q9C0D5_HUMAN         |
| P10599               | Thioredoxin - Homo sapiens (Human)                                                                   | THIO_HUMAN           |
| O95881               | Thioredoxin domain-containing protein 12 precursor - Homo sapiens (Human)                            | TXD12_HUMAN          |
| Q9BS26               | Thioredoxin domain-containing protein 4 precursor - Homo sapiens (Human)                             | TXND4_HUMAN          |
| Q9BRA2               | Thioredoxin-like protein 5 - Homo sapiens (Human)                                                    | TXNL5_HUMAN          |
| Q86V81               | THO complex subunit 4 - Homo sapiens (Human)                                                         | THOC4_HUMAN          |
| P07996               | Thrombospondin-1 precursor - Homo sapiens (Human)                                                    | TSP1_HUMAN           |
| Q9P016               | Thymocyte nuclear protein 1 - Homo sapiens (Human)                                                   | THYN1_HUMAN          |
| P63313               | Thymosin beta-10 - Homo sapiens (Human)                                                              | TYB10_HUMAN          |
| Q9Y2W1               | Thyroid hormone receptor-associated protein 3 - Homo sapiens (Human)                                 | TR150_HUMAN          |
| Q15643               | Thyroid receptor-interacting protein 11 - Homo sapiens (Human)                                       | TRIPB_HUMAN          |
| Q9P031               | Thyroid transcription factor 1-associated protein 26 - Homo sapiens (Human)                          | TAP26_HUMAN          |
| Q07157               | Tight junction protein ZO-1 - Homo sapiens (Human)                                                   | ZO1_HUMAN            |
| Q9UDY2               | Tight junction protein ZO-2 - Homo sapiens (Human)                                                   | ZO2_HUMAN            |
| Q5JTD0               | Tight junction-associated protein 1 - Homo sapiens (Human)                                           | TJAP1_HUMAN          |
| Q6ZVM7               | TOM1-like protein 2 - Homo sapiens (Human)                                                           | TM1L2_HUMAN          |
| Q5JTV8               | Torsin-1A-interacting protein 1 - Homo sapiens (Human)                                               | TOIP1_HUMAN          |
| P23193               | Transcription elongation factor A protein 1 - Homo sapiens (Human)                                   | TCEA1_HUMAN          |
| O75764               | Transcription elongation factor A protein 3 - Homo sapiens (Human)                                   | TCEA3_HUMAN          |
| Q969E4               | Transcription elongation factor A protein-like 3 - Homo sapiens (Human)                              | TCAL3_HUMAN          |
| Q96EI5               | Transcription elongation factor A protein-like 4 - Homo sapiens (Human)                              | TCAL4_HUMAN          |
| Q14241               | Transcription elongation factor B polypeptide 3 - Homo sapiens (Human)                               | ELOA1_HUMAN          |
| O00267               | Transcription elongation factor SPT5 - Homo sapiens (Human)                                          | SPT5H_HUMAN          |
| O14776               | Transcription elongation regulator 1 - Homo sapiens (Human)                                          | TCRG1_HUMAN          |
| Q9UGU0               | Transcription factor 20 - Homo sapiens (Human)                                                       | TCF20_HUMAN          |
| Q00059               | Transcription factor A, mitochondrial precursor - Homo sapiens (Human)                               | TFAM_HUMAN           |
| P05412               | Transcription factor AP-1 - Homo sapiens (Human)                                                     | JUN_HUMAN            |
| P20290               | Transcription factor BTF3 - Homo sapiens (Human)                                                     | BTF3_HUMAN           |
| Q13891               | Transcription factor BTF3 homolog 2 - Homo sapiens (Human)                                           | BT3L2_HUMAN          |

| <i>Accession No*</i> | <i>Protein Name*</i>                                                              | <i>Reference No*</i> |
|----------------------|-----------------------------------------------------------------------------------|----------------------|
| P19484               | Transcription factor EB - Homo sapiens (Human)                                    | TFEB_HUMAN           |
| P17535               | Transcription factor jun-D - Homo sapiens (Human)                                 | JUND_HUMAN           |
| P35269               | Transcription initiation factor IIF subunit alpha - Homo sapiens (Human)          | T2FA_HUMAN           |
| P13984               | Transcription initiation factor IIF subunit beta - Homo sapiens (Human)           | T2FB_HUMAN           |
| Q15545               | Transcription initiation factor TFIID subunit 7 - Homo sapiens (Human)            | TAF7_HUMAN           |
| Q00577               | Transcriptional activator protein Pur-alpha - Homo sapiens (Human)                | PURA_HUMAN           |
| P11308               | Transcriptional regulator ERG - Homo sapiens (Human)                              | ERG_HUMAN            |
| Q86YP4               | Transcriptional repressor p66 alpha - Homo sapiens (Human)                        | P66A_HUMAN           |
| Q8WX19               | Transcriptional repressor p66 beta - Homo sapiens (Human)                         | P66B_HUMAN           |
| P25490               | Transcriptional repressor protein YY1 - Homo sapiens (Human)                      | YY1_HUMAN            |
| Q04726               | Transducin-like enhancer protein 3 - Homo sapiens (Human)                         | TLE3_HUMAN           |
| O75410               | Transforming acidic coiled-coil-containing protein 1 - Homo sapiens (Human)       | TACC1_HUMAN          |
| Q9Y6A5               | Transforming acidic coiled-coil-containing protein 3 - Homo sapiens (Human)       | TACC3_HUMAN          |
| O43294               | Transforming growth factor beta-1-induced transcript 1 protein - Homo sapiens (Hu | TGFI1_HUMAN          |
| Q01995               | Transgelin - Homo sapiens (Human)                                                 | TAGL_HUMAN           |
| P37802               | Transgelin-2 - Homo sapiens (Human)                                               | TAGL2_HUMAN          |
| O43493               | Trans-Golgi network integral membrane protein 2 precursor - Homo sapiens (Huma    | TGON2_HUMAN          |
| Q9HBA0               | Transient receptor potential cation channel subfamily V member 4 - Homo sapiens ( | TRPV4_HUMAN          |
| P55072               | Transitional endoplasmic reticulum ATPase - Homo sapiens (Human)                  | TERA_HUMAN           |
| Q9ULS5               | Transmembrane and coiled-coil domains protein 3 - Homo sapiens (Human)            | TMCC3_HUMAN          |
| Q92545               | Transmembrane protein 131 - Homo sapiens (Human)                                  | TM131_HUMAN          |
| P02766               | Transthyretin precursor - Homo sapiens (Human)                                    | TTHY_HUMAN           |
| Q13428               | Treacle protein - Homo sapiens (Human)                                            | TCOF_HUMAN           |
| Q9BT09               | Trinucleotide repeat containing 5 - Homo sapiens (Human)                          | Q9BT09_HUMAN         |
| Q9UPQ9               | Trinucleotide repeat-containing 6B protein - Homo sapiens (Human)                 | TNC6B_HUMAN          |
| Q9H2D6               | TRIO and F-actin-binding protein - Homo sapiens (Human)                           | TARA_HUMAN           |
| P60174               | Triosephosphate isomerase - Homo sapiens (Human)                                  | TPIS_HUMAN           |
| Q14CA3               | TRIP12 protein - Homo sapiens (Human)                                             | Q14CA3_HUMAN         |
| Q14258               | Tripartite motif-containing protein 25 - Homo sapiens (Human)                     | TRI25_HUMAN          |
| Q9NZR1               | Tropomodulin-2 - Homo sapiens (Human)                                             | TMOD2_HUMAN          |
| Q9NYL9               | Tropomodulin-3 - Homo sapiens (Human)                                             | TMOD3_HUMAN          |
| Q1ZYL5               | Tropomyosin 1 alpha variant 6 - Homo sapiens (Human)                              | Q1ZYL5_HUMAN         |
| P67936               | Tropomyosin alpha-4 chain - Homo sapiens (Human)                                  | TPM4_HUMAN           |

| <i>Accession No*</i> | <i>Protein Name*</i>                                                               | <i>Reference No*</i> |
|----------------------|------------------------------------------------------------------------------------|----------------------|
| P07951               | Tropomyosin beta chain - Homo sapiens (Human)                                      | TPM2_HUMAN           |
| O75157               | TSC22 domain family protein 2 - Homo sapiens (Human)                               | T22D2_HUMAN          |
| Q9Y3Q8               | TSC22 domain family protein 4 - Homo sapiens (Human)                               | T22D4_HUMAN          |
| O94811               | Tubulin polymerization-promoting protein - Homo sapiens (Human)                    | TPPP_HUMAN           |
| Q9BW30               | Tubulin polymerization-promoting protein family member 3 - Homo sapiens (Human)    | TPPP3_HUMAN          |
| O75347               | Tubulin-specific chaperone A - Homo sapiens (Human)                                | TBCA_HUMAN           |
| Q9H7E2               | Tudor domain-containing protein 3 - Homo sapiens (Human)                           | TDRD3_HUMAN          |
| Q9UBB9               | Tuftelin-interacting protein 11 - Homo sapiens (Human)                             | TFP11_HUMAN          |
| Q12888               | Tumor suppressor p53-binding protein 1 - Homo sapiens (Human)                      | TP53B_HUMAN          |
| Q9H792               | Tyrosine-protein kinase SgK269 - Homo sapiens (Human)                              | SG269_HUMAN          |
| Q05209               | Tyrosine-protein phosphatase non-receptor type 12 - Homo sapiens (Human)           | PTN12_HUMAN          |
| P08621               | U1 small nuclear ribonucleoprotein 70 kDa - Homo sapiens (Human)                   | RU17_HUMAN           |
| P09012               | U1 small nuclear ribonucleoprotein A - Homo sapiens (Human)                        | SNRPA_HUMAN          |
| P08579               | U2 small nuclear ribonucleoprotein B" - Homo sapiens (Human)                       | RU2B_HUMAN           |
| Q9BVJ6               | U3 small nucleolar RNA-associated protein 14 homolog A - Homo sapiens (Human)      | UT14A_HUMAN          |
| Q8WWY3               | U4/U6 small nuclear ribonucleoprotein Prp31 - Homo sapiens (Human)                 | PRP31_HUMAN          |
| O43290               | U4/U6.U5 tri-snRNP-associated protein 1 - Homo sapiens (Human)                     | SNUT1_HUMAN          |
| P07919               | Ubiquinol-cytochrome c reductase complex 11 kDa protein, mitochondrial precursor   | UCRH_HUMAN           |
| P14927               | Ubiquinol-cytochrome c reductase complex 14 kDa protein - Homo sapiens (Human)     | UCR6_HUMAN           |
| P22695               | Ubiquinol-cytochrome-c reductase complex core protein 2, mitochondrial precursor - | UQCR2_HUMAN          |
| O14562               | Ubiquitin domain-containing protein UBF1 - Homo sapiens (Human)                    | UBFD1_HUMAN          |
| Q92890               | Ubiquitin fusion degradation protein 1 homolog - Homo sapiens (Human)              | UFD1_HUMAN           |
| Q9NZ09               | Ubiquitin-associated protein 1 - Homo sapiens (Human)                              | UBAP1_HUMAN          |
| Q14157               | Ubiquitin-associated protein 2-like - Homo sapiens (Human)                         | UBP2L_HUMAN          |
| P68036               | Ubiquitin-conjugating enzyme E2 L3 - Homo sapiens (Human)                          | UB2L3_HUMAN          |
| Q9NYU2               | UDP-glucose:glycoprotein glucosyltransferase 1 precursor - Homo sapiens (Human)    | UGGG1_HUMAN          |
| P30085               | UMP-CMP kinase - Homo sapiens (Human)                                              | KCY_HUMAN            |
| Q8IXM2               | Uncharacterized potential DNA-binding protein C17orf49 - Homo sapiens (Human)      | CQ049_HUMAN          |
| Q96B45               | Uncharacterized protein C10orf32 - Homo sapiens (Human)                            | CJ032_HUMAN          |
| Q96A22               | Uncharacterized protein C11orf52 - Homo sapiens (Human)                            | CK052_HUMAN          |
| Q96C57               | Uncharacterized protein C12orf43 - Homo sapiens (Human)                            | CL043_HUMAN          |
| Q7Z6K5               | Uncharacterized protein C15orf38 - Homo sapiens (Human)                            | CO038_HUMAN          |
| Q9BRT3               | Uncharacterized protein C17orf37 - Homo sapiens (Human)                            | CQ037_HUMAN          |

| <i>Accession No*</i> | <i>Protein Name*</i>                                     | <i>Reference No*</i> |
|----------------------|----------------------------------------------------------|----------------------|
| Q96B23               | Uncharacterized protein C18orf25 - Homo sapiens (Human)  | CR025_HUMAN          |
| Q9BQ61               | Uncharacterized protein C19orf43 - Homo sapiens (Human)  | CS043_HUMAN          |
| Q9BW61               | Uncharacterized protein C19orf58 - Homo sapiens (Human)  | Q9BW61_HUMAN         |
| Q9H0W8               | Uncharacterized protein C19orf61 - Homo sapiens (Human)  | CS061_HUMAN          |
| Q9NWX8               | Uncharacterized protein C19orf62 - Homo sapiens (Human)  | CS062_HUMAN          |
| Q8IYL3               | Uncharacterized protein C1orf174 - Homo sapiens (Human)  | CA174_HUMAN          |
| Q9H425               | Uncharacterized protein C1orf198 - Homo sapiens (Human)  | CA198_HUMAN          |
| Q5JTJ3               | Uncharacterized protein C1orf31 - Homo sapiens (Human)   | CA031_HUMAN          |
| Q9BV19               | Uncharacterized protein C1orf50 - Homo sapiens (Human)   | CA050_HUMAN          |
| Q6IQ49               | Uncharacterized protein C1orf55 - Homo sapiens (Human)   | CA055_HUMAN          |
| Q9P0P8               | Uncharacterized protein C6orf203 - Homo sapiens (Human)  | CF203_HUMAN          |
| Q86YL5               | Uncharacterized protein C8orf42 - Homo sapiens (Human)   | Q86YL5_HUMAN         |
| Q6P6B1               | Uncharacterized protein C8orf47 - Homo sapiens (Human)   | CH047_HUMAN          |
| Q9BUH6               | Uncharacterized protein C9orf142 - Homo sapiens (Human)  | CI142_HUMAN          |
| Q9H8G2               | Uncharacterized protein C9orf82 - Homo sapiens (Human)   | CI082_HUMAN          |
| Q93073               | Uncharacterized protein KIAA0256 - Homo sapiens (Human)  | K0256_HUMAN          |
| Q5VT52               | Uncharacterized protein KIAA0460 - Homo sapiens (Human)  | K0460_HUMAN          |
| Q5JSZ5               | Uncharacterized protein KIAA0515 - Homo sapiens (Human)  | K0515_HUMAN          |
| Q9Y4B5               | Uncharacterized protein KIAA0802 - Homo sapiens (Human)  | K0802_HUMAN          |
| O94909               | Uncharacterized protein KIAA0819 - Homo sapiens (Human)  | K0819_HUMAN          |
| Q96AT1               | Uncharacterized protein KIAA1143 - Homo sapiens (Human)  | K1143_HUMAN          |
| Q9P1Y5               | Uncharacterized protein KIAA1543 - Homo sapiens (Human)  | K1543_HUMAN          |
| Q9BY89               | Uncharacterized protein KIAA1671 - Homo sapiens (Human)  | K1671_HUMAN          |
| Q8IXQ4               | Uncharacterized protein KIAA1704 - Homo sapiens (Human)  | K1704_HUMAN          |
| Q9NZB2               | UPF0318 protein FAM120A - Homo sapiens (Human)           | F120A_HUMAN          |
| Q9H7C9               | UPF0366 protein C11orf67 - Homo sapiens (Human)          | CK067_HUMAN          |
| Q5VUM1               | UPF0369 protein C6orf57 precursor - Homo sapiens (Human) | CF057_HUMAN          |
| Q9Y3C1               | UPF0384 protein CGI-117 - Homo sapiens (Human)           | U384_HUMAN           |
| Q9NWB6               | UPF0430 protein - Homo sapiens (Human)                   | U430_HUMAN           |
| Q8WUH6               | UPF0444 protein C12orf23 - Homo sapiens (Human)          | CL023_HUMAN          |
| Q9UFG5               | UPF0449 protein C19orf25 - Homo sapiens (Human)          | CS025_HUMAN          |
| P07911               | Uromodulin precursor - Homo sapiens (Human)              | UROM_HUMAN           |
| Q92738               | USP6 N-terminal-like protein - Homo sapiens (Human)      | US6NL_HUMAN          |

| <i>Accession No*</i> | <i>Protein Name*</i>                                                              | <i>Reference No*</i> |
|----------------------|-----------------------------------------------------------------------------------|----------------------|
| P54725               | UV excision repair protein RAD23 homolog A - Homo sapiens (Human)                 | RD23A_HUMAN          |
| P54727               | UV excision repair protein RAD23 homolog B - Homo sapiens (Human)                 | RD23B_HUMAN          |
| Q9BZF9               | Uveal autoantigen with coiled-coil domains and ankyrin repeats - Homo sapiens (Hu | UACA_HUMAN           |
| P36543               | Vacuolar ATP synthase subunit E 1 - Homo sapiens (Human)                          | VATE1_HUMAN          |
| Q16864               | Vacuolar ATP synthase subunit F - Homo sapiens (Human)                            | VATF_HUMAN           |
| O75348               | Vacuolar ATP synthase subunit G 1 - Homo sapiens (Human)                          | VATG1_HUMAN          |
| P19320               | Vascular cell adhesion protein 1 precursor - Homo sapiens (Human)                 | VCAM1_HUMAN          |
| P50552               | Vasodilator-stimulated phosphoprotein - Homo sapiens (Human)                      | VASP_HUMAN           |
| P13611               | Versican core protein precursor - Homo sapiens (Human)                            | CSPG2_HUMAN          |
| Q9UEU0               | Vesicle transport through interaction with t-SNAREs homolog 1B - Homo sapiens (H  | VTI1B_HUMAN          |
| Q15836               | Vesicle-associated membrane protein 3 - Homo sapiens (Human)                      | VAMP3_HUMAN          |
| Q9BV40               | Vesicle-associated membrane protein 8 - Homo sapiens (Human)                      | VAMP8_HUMAN          |
| Q9P0L0               | Vesicle-associated membrane protein-associated protein A - Homo sapiens (Human)   | VAPA_HUMAN           |
| O95292               | Vesicle-associated membrane protein-associated protein B/C - Homo sapiens (Hum    | VAPB_HUMAN           |
| P08670               | Vimentin - Homo sapiens (Human)                                                   | VIME_HUMAN           |
| Q2NL98               | Vimentin-type IF-associated coiled-coil protein - Homo sapiens (Human)            | Q2NL98_HUMAN         |
| P18206               | Vinculin - Homo sapiens (Human)                                                   | VINC_HUMAN           |
| O60504               | Vinexin - Homo sapiens (Human)                                                    | VINEX_HUMAN          |
| Q53F31               | Vitamin D-binding protein variant - Homo sapiens (Human)                          | Q53F31_HUMAN         |
| P04004               | Vitronectin precursor - Homo sapiens (Human)                                      | VTNC_HUMAN           |
| P04275               | von Willebrand factor precursor - Homo sapiens (Human)                            | VWF_HUMAN            |
| Q8TF74               | WAS/WASL-interacting protein family member 2 - Homo sapiens (Human)               | WIPF2_HUMAN          |
| Q9C0J8               | WD repeat protein 33 - Homo sapiens (Human)                                       | WDR33_HUMAN          |
| Q5JSH3               | WD repeat protein 44 - Homo sapiens (Human)                                       | WDR44_HUMAN          |
| A4D1P6               | WD repeat protein 91 - Homo sapiens (Human)                                       | WDR91_HUMAN          |
| Q15007               | Wilms tumor 1-associating protein - Homo sapiens (Human)                          | WTAP_HUMAN           |
| Q7Z5K2               | Wings apart-like protein homolog - Homo sapiens (Human)                           | WAPL_HUMAN           |
| P42768               | Wiskott-Aldrich syndrome protein - Homo sapiens (Human)                           | WASP_HUMAN           |
| Q9Y6W5               | Wiskott-Aldrich syndrome protein family member 2 - Homo sapiens (Human)           | WASF2_HUMAN          |
| Q9Y2W2               | WW domain-binding protein 11 - Homo sapiens (Human)                               | WBP11_HUMAN          |
| O75554               | WW domain-binding protein 4 - Homo sapiens (Human)                                | WBP4_HUMAN           |
| P49750               | YLP motif-containing protein 1 - Homo sapiens (Human)                             | YLPM1_HUMAN          |
| Q9BYJ9               | YTH domain family protein 1 - Homo sapiens (Human)                                | YTHD1_HUMAN          |

| <i>Accession No*</i> | <i>Protein Name*</i>                                                       | <i>Reference No*</i> |
|----------------------|----------------------------------------------------------------------------|----------------------|
| Q9Y5A9               | YTH domain family protein 2 - Homo sapiens (Human)                         | YTHD2_HUMAN          |
| Q7Z739               | YTH domain family protein 3 - Homo sapiens (Human)                         | YTHD3_HUMAN          |
| Q96MU7               | YTH domain-containing protein 1 - Homo sapiens (Human)                     | YTDC1_HUMAN          |
| Q8IY57               | YY1-associated factor 2 - Homo sapiens (Human)                             | YAF2_HUMAN           |
| O75152               | Zinc finger CCCH domain-containing protein 11A - Homo sapiens (Human)      | ZC11A_HUMAN          |
| Q5T200               | Zinc finger CCCH domain-containing protein 13 - Homo sapiens (Human)       | ZC313_HUMAN          |
| Q9C0B0               | Zinc finger CCCH domain-containing protein 5 - Homo sapiens (Human)        | ZC3H5_HUMAN          |
| Q9UPT8               | Zinc finger CCCH domain-containing protein C19orf7 - Homo sapiens (Human)  | CS007_HUMAN          |
| Q7Z2W4               | Zinc finger CCCH type antiviral protein 1 - Homo sapiens (Human)           | ZCC2_HUMAN           |
| Q7Z3T8               | Zinc finger FYVE domain-containing protein 16 - Homo sapiens (Human)       | ZFY16_HUMAN          |
| Q96NC0               | Zinc finger matrin-type protein 2 - Homo sapiens (Human)                   | ZMAT2_HUMAN          |
| A4FTV3               | Zinc finger protein 185 - Homo sapiens (Human)                             | A4FTV3_HUMAN         |
| P17026               | Zinc finger protein 22 - Homo sapiens (Human)                              | ZNF22_HUMAN          |
| Q9Y3S2               | Zinc finger protein 330 - Homo sapiens (Human)                             | ZN330_HUMAN          |
| Q9UL40               | Zinc finger protein 346 - Homo sapiens (Human)                             | ZN346_HUMAN          |
| Q96B54               | Zinc finger protein 428 - Homo sapiens (Human)                             | Q96B54_HUMAN         |
| Q86UK7               | Zinc finger protein 598 - Homo sapiens (Human)                             | ZN598_HUMAN          |
| Q969S3               | Zinc finger protein 622 - Homo sapiens (Human)                             | ZN622_HUMAN          |
| Q14966               | Zinc finger protein 638 - Homo sapiens (Human)                             | ZN638_HUMAN          |
| Q6DD87               | Zinc finger protein 787 - Homo sapiens (Human)                             | ZN787_HUMAN          |
| Q96JM3               | Zinc finger protein KIAA1802 - Homo sapiens (Human)                        | K1802_HUMAN          |
| Q92785               | Zinc finger protein ubi-d4 - Homo sapiens (Human)                          | REQU_HUMAN           |
| O95218               | Zinc finger Ran-binding domain-containing protein 2 - Homo sapiens (Human) | ZRAB2_HUMAN          |
| Q15942               | Zyxin - Homo sapiens (Human)                                               | ZYX_HUMAN            |
