# Supplementary material
Source: PubMed Central journal article supplement (PMC3251958)
Supplement: NIHMS175878-supplement-5_si_005.pdf [file NIHMS175878-supplement-5_si_005.pdf]

## Table S-2a

A list of 8,194 unique protein-specific peptides identified in kidney, sorted by protein name.

\*MS/MS spectra were searched against the UniProt Human proteomic database; release 09/07.

\*\* The highest Xcorr observed for identified peptide. \*\*\* Total count of peptide identifications.

| Accession No*                                                                                               | Charge | XC(Max)** | Peptide*                       | TC*** | Reference No* |
|-------------------------------------------------------------------------------------------------------------|--------|-----------|--------------------------------|-------|---------------|
| <b><i>10 kDa heat shock protein, mitochondrial - Homo sapiens (Human)</i></b>                               |        |           |                                |       |               |
| P61604                                                                                                      | 2      | 3.7997    | R.SAAETVTKGGIM#LPEK.S          | 3     | CH10_HUMAN    |
| P61604                                                                                                      | 1      | 2.3826    | K.VLLPEYGGTK.V                 | 3     | CH10_HUMAN    |
| P61604                                                                                                      | 2      | 3.1094    | R.KFLPLFDR.V                   | 6     | CH10_HUMAN    |
| P61604                                                                                                      | 2      | 5.9863    | K.VLQATVAVGSGSK.G              | 109   | CH10_HUMAN    |
| P61604                                                                                                      | 2      | 5.1594    | K.VLQATVAVGSGSKGK.G            | 7     | CH10_HUMAN    |
| P61604                                                                                                      | 3      | 4.3142    | K.VLQATVAVGSGSKGKGGEIQPVSVK.V  | 2     | CH10_HUMAN    |
| P61604                                                                                                      | 2      | 4.3245    | K.VVLDKDYFLFR.D                | 69    | CH10_HUMAN    |
| P61604                                                                                                      | 2      | 3.4466    | K.VVLDKDYFLFRDGDILGK.Y         | 1     | CH10_HUMAN    |
| P61604                                                                                                      | 2      | 3.0086    | R.DGDILGKYVD.-                 | 2     | CH10_HUMAN    |
| P61604                                                                                                      | 3      | 6.2025    | K.SQGKVLQATVAVGSGSKGK.G        | 3     | CH10_HUMAN    |
| P61604                                                                                                      | 1      | 3.0835    | R.SAAETVTK.G                   | 53    | CH10_HUMAN    |
| P61604                                                                                                      | 2      | 4.3276    | R.VLVERSAETVTK.G               | 4     | CH10_HUMAN    |
| P61604                                                                                                      | 1      | 3.1479    | R.DGDILGK.Y                    | 20    | CH10_HUMAN    |
| P61604                                                                                                      | 3      | 5.6214    | K.GGIM#LPEKSQGKVLQATVAVGSGSK.G | 7     | CH10_HUMAN    |
| P61604                                                                                                      | 1      | 2.2758    | K.FLPLFDR.V                    | 3     | CH10_HUMAN    |
| P61604                                                                                                      | 2      | 3.3881    | K.FLPLFDRVLVER.S               | 22    | CH10_HUMAN    |
| P61604                                                                                                      | 1      | 3.6003    | K.GGEIQPVSVK.V                 | 28    | CH10_HUMAN    |
| P61604                                                                                                      | 2      | 3.8249    | R.KFLPLFDRVLVER.S              | 7     | CH10_HUMAN    |
| P61604                                                                                                      | 2      | 3.4311    | K.GGIM#LPEKSQGK.V              | 5     | CH10_HUMAN    |
| P61604                                                                                                      | 2      | 4.4574    | K.VGDKVLLPEYGGTK.V             | 24    | CH10_HUMAN    |
| P61604                                                                                                      | 1      | 2.4851    | K.GGIMLPEK.S                   | 6     | CH10_HUMAN    |
| P61604                                                                                                      | 2      | 3.772     | K.GGIMLPEKSQGK.V               | 4     | CH10_HUMAN    |
| P61604                                                                                                      | 3      | 5.7723    | K.GGIMLPEKSQGKVLQATVAVGSGSK.G  | 7     | CH10_HUMAN    |
| P61604                                                                                                      | 2      | 3.4372    | K.GKGGEIQPVSVK.V               | 2     | CH10_HUMAN    |
| P61604                                                                                                      | 2      | 6.7387    | K.SQGKVLQATVAVGSGSK.G          | 22    | CH10_HUMAN    |
| P61604                                                                                                      | 2      | 3.0219    | K.GGIM#LPEK.S                  | 4     | CH10_HUMAN    |
| <b><i>130 kDa phosphatidylinositol 4,5-bisphosphate-dependent ARF1 GTPase-activating protein - Homo</i></b> |        |           |                                |       |               |
| Q9ULH1                                                                                                      | 2      | 3.4245    | K.SHPLDLSPNVQSR.D              | 1     | DDEF1_HUMAN   |
| Q9ULH1                                                                                                      | 2      | 3.5441    | K.GVFPVSVFHILSD.-              | 3     | DDEF1_HUMAN   |
| Q9ULH1                                                                                                      | 2      | 4.3333    | K.GPTGPPSTLPLSTQTSSGSSTLSK.K   | 2     | DDEF1_HUMAN   |
| <b><i>13kDa differentiation-associated protein variant - Homo sapiens (Human)</i></b>                       |        |           |                                |       |               |

| <i>Accession No*</i>                                                     | <i>Charge</i> | <i>XC(Max)**</i> | <i>Peptide*</i>                   | <i>TC***</i> | <i>Reference No*</i> |
|--------------------------------------------------------------------------|---------------|------------------|-----------------------------------|--------------|----------------------|
| Q53HG1                                                                   | 2             | 3.1245           | K.FNVTGTPEQYVPYSTTR.K             | 1            | Q53HG1_HUMAN         |
| <b><i>14 kDa phosphohistidine phosphatase - Homo sapiens (Human)</i></b> |               |                  |                                   |              |                      |
| Q9NRX4                                                                   | 3             | 5.2878           | K.KIHVYGYSM#AYGPAQHAISTEK.I       | 1            | PHP14_HUMAN          |
| Q9NRX4                                                                   | 3             | 4.4981           | K.IHVYGYSMAYGPAQHAISTEK.I         | 2            | PHP14_HUMAN          |
| Q9NRX4                                                                   | 2             | 5.2283           | K.IHVYGYSM#AYGPAQHAISTEK.I        | 4            | PHP14_HUMAN          |
| Q9NRX4                                                                   | 2             | 3.9298           | K.AKYPDYEVTWANDGY.-               | 9            | PHP14_HUMAN          |
| <b><i>14-3-3 protein beta/alpha - Homo sapiens (Human)</i></b>           |               |                  |                                   |              |                      |
| P31946                                                                   | 2             | 4.5068           | K.QTTVSNSQQAYQEAFEISK.K           | 1            | 1433B_HUMAN          |
| P31946                                                                   | 2             | 3.0707           | R.YLSEVASGDNK.Q                   | 5            | 1433B_HUMAN          |
| P31946                                                                   | 2             | 4.2421           | K.TAFDEAIAELDTLNEESYK.D           | 1            | 1433B_HUMAN          |
| <b><i>14-3-3 protein epsilon - Homo sapiens (Human)</i></b>              |               |                  |                                   |              |                      |
| P62258                                                                   | 2             | 2.7739           | R.YLAEFATGNDR.K                   | 1            | 1433E_HUMAN          |
| P62258                                                                   | 2             | 3.1987           | K.AASDIAMTELPPTHPIR.L             | 1            | 1433E_HUMAN          |
| P62258                                                                   | 2             | 2.8839           | K.EAAENSLVAYK.A                   | 2            | 1433E_HUMAN          |
| P62258                                                                   | 3             | 4.3901           | K.LAEQAERYDEM#VESM#K.K            | 1            | 1433E_HUMAN          |
| P62258                                                                   | 3             | 3.7328           | K.LAEQAERYDEM#VESMCK.V            | 1            | 1433E_HUMAN          |
| P62258                                                                   | 3             | 4.9792           | K.LAEQAERYDEMVESM#K.K             | 2            | 1433E_HUMAN          |
| P62258                                                                   | 3             | 4.5685           | K.LAEQAERYDEMVESMK.K              | 3            | 1433E_HUMAN          |
| P62258                                                                   | 2             | 4.5256           | R.IISSIEQKEENK.G                  | 1            | 1433E_HUMAN          |
| P62258                                                                   | 3             | 5.0568           | K.AAFDDAIAELDTLSEESYKDSLIM#QLLR.D | 1            | 1433E_HUMAN          |
| P62258                                                                   | 2             | 3.57             | R.YLAEFATGNDRK.E                  | 4            | 1433E_HUMAN          |
| P62258                                                                   | 2             | 4.0215           | K.AAFDDAIAELDTLSEESYK.D           | 1            | 1433E_HUMAN          |
| P62258                                                                   | 3             | 6.5064           | K.LAEQAERYDEMVESMCK.V             | 3            | 1433E_HUMAN          |
| <b><i>14-3-3 protein gamma - Homo sapiens (Human)</i></b>                |               |                  |                                   |              |                      |
| P61981                                                                   | 2             | 2.7354           | K.RATVVESSEK.A                    | 1            | 1433G_HUMAN          |
| P61981                                                                   | 2             | 5.6036           | K.NVTELNEPLSNEER.N                | 3            | 1433G_HUMAN          |
| <b><i>14-3-3 protein zeta/delta - Homo sapiens (Human)</i></b>           |               |                  |                                   |              |                      |
| P63104                                                                   | 2             | 3.1722           | R.YLAEVAAGDDKK.G                  | 2            | 1433Z_HUMAN          |
| P63104                                                                   | 3             | 6.2506           | K.KGIVDQSQQAYQEAFEISKK.E          | 2            | 1433Z_HUMAN          |
| <b><i>182 kDa tankyrase 1-binding protein - Homo sapiens (Human)</i></b> |               |                  |                                   |              |                      |
| Q9C0C2                                                                   | 2             | 3.697            | K.ELGVGQM#DWGNLGLR.D              | 2            | TB182_HUMAN          |
| Q9C0C2                                                                   | 2             | 3.1276           | R.EMEEELVPTGSEPGDTR.A             | 2            | TB182_HUMAN          |
| Q9C0C2                                                                   | 2             | 3.61             | R.EM#EEELVPTGSEPGDTR.A            | 1            | TB182_HUMAN          |
| Q9C0C2                                                                   | 3             | 6.0982           | R.EEGVSQQGQAGSAPSGSGSSWVQGDPSM    | 2            | TB182_HUMAN          |

| <i>Accession No*</i> | <i>Charge</i> | <i>XC(Max)**</i> | <i>Peptide*</i>              | <i>TC***</i> | <i>Reference No*</i> |
|----------------------|---------------|------------------|------------------------------|--------------|----------------------|
| Q9C0C2               | 2             | 2.9482           | R.EAAFSPGQQDWSR.D            | 1            | TB182_HUMAN          |
| Q9C0C2               | 2             | 3.3987           | R.DVSLGDWDFGKR.D             | 2            | TB182_HUMAN          |
| Q9C0C2               | 2             | 3.0573           | R.DEDGSTLFR.G                | 3            | TB182_HUMAN          |
| Q9C0C2               | 2             | 3.4518           | R.SQEADVQDWEFR.K             | 2            | TB182_HUMAN          |
| Q9C0C2               | 2             | 3.2468           | R.FSEGVLQSPSQDQEK.L          | 1            | TB182_HUMAN          |
| Q9C0C2               | 2             | 4.0288           | R.PLIEVGELLDLTR.T            | 1            | TB182_HUMAN          |
| Q9C0C2               | 2             | 3.4041           | R.SYQFGIIGNDR.V              | 2            | TB182_HUMAN          |
| Q9C0C2               | 2             | 3.1358           | R.YESQEPLAQESPLPLATR.E       | 2            | TB182_HUMAN          |
| Q9C0C2               | 2             | 2.8252           | R.DSQGTYSR.D                 | 1            | TB182_HUMAN          |
| Q9C0C2               | 3             | 7.9672           | R.SFGTRPLSSGFSPEEAQQDDEEFK.K | 4            | TB182_HUMAN          |
| Q9C0C2               | 3             | 3.8919           | R.ERGVGQADWTPDLGLR.N         | 1            | TB182_HUMAN          |
| Q9C0C2               | 2             | 3.1829           | R.AAEPQEQEFGK.S              | 2            | TB182_HUMAN          |
| Q9C0C2               | 2             | 4.0531           | K.YGQGAGEGSTR.E              | 6            | TB182_HUMAN          |
| Q9C0C2               | 2             | 3.1651           | K.VSAPGVLTAQDR.V             | 1            | TB182_HUMAN          |
| Q9C0C2               | 2             | 3.4609           | K.TTAGSVDWTDQLGLR.N          | 2            | TB182_HUMAN          |
| Q9C0C2               | 2             | 2.9407           | R.QQAGAQQPGSADLEDGEMGK.R     | 1            | TB182_HUMAN          |
| Q9C0C2               | 2             | 3.7133           | K.KIPSVEDSLGEGSR.D           | 3            | TB182_HUMAN          |
| Q9C0C2               | 2             | 4.8634           | R.FAATTVEEILAK.M             | 4            | TB182_HUMAN          |
| Q9C0C2               | 2             | 3.1765           | R.DSLGAYASQDANEQQDGLGKR.D    | 1            | TB182_HUMAN          |
| Q9C0C2               | 2             | 3.1662           | R.GPLAELPSAR.K               | 1            | TB182_HUMAN          |
| Q9C0C2               | 2             | 4.5883           | R.GVGQADWTPDLGLR.N           | 4            | TB182_HUMAN          |
| Q9C0C2               | 3             | 5.2712           | K.SKDLAEVGEVGGGHSQAR.E       | 2            | TB182_HUMAN          |
| Q9C0C2               | 2             | 2.8967           | R.GWSQEGPVK.S                | 2            | TB182_HUMAN          |
| Q9C0C2               | 2             | 6.0852           | R.DSLGAYASQDANEQQDGLGK.R     | 9            | TB182_HUMAN          |
| Q9C0C2               | 2             | 3.8768           | R.GSGGLFSPSTAHVPDGalGQR.D    | 1            | TB182_HUMAN          |
| Q9C0C2               | 2             | 3.5108           | R.DAELQDQDFGKR.D             | 4            | TB182_HUMAN          |

***2,4-dienoyl-CoA reductase, mitochondrial precursor - Homo sapiens (Human)***

|        |   |        |                            |   |            |
|--------|---|--------|----------------------------|---|------------|
| Q16698 | 3 | 3.9137 | K.VAGHPNIVINNAAGNFISPTER.L | 1 | DECR_HUMAN |
| Q16698 | 2 | 2.8507 | K.EQWDTIEELIR.K            | 1 | DECR_HUMAN |
| Q16698 | 2 | 4.3039 | K.ATAEQISSQTGNK.V          | 2 | DECR_HUMAN |

***250 kDa substrate of Akt - Homo sapiens (Human)***

|        |   |        |                         |   |             |
|--------|---|--------|-------------------------|---|-------------|
| Q2PPJ7 | 2 | 3.0889 | K.AENTQNSSSSEPQPIQENK.G | 2 | AS250_HUMAN |
|--------|---|--------|-------------------------|---|-------------|

***26S protease regulatory subunit 4 - Homo sapiens (Human)***

|        |   |        |                 |   |            |
|--------|---|--------|-----------------|---|------------|
| P62191 | 2 | 2.9004 | K.KQEGTPEGLYL.- | 1 | PRS4_HUMAN |
|--------|---|--------|-----------------|---|------------|

***26S protease regulatory subunit 6A - Homo sapiens (Human)***

| <i>Accession No*</i>                                                                | <i>Charge</i> | <i>XC(Max)**</i> | <i>Peptide*</i>                | <i>TC***</i> | <i>Reference No*</i> |
|-------------------------------------------------------------------------------------|---------------|------------------|--------------------------------|--------------|----------------------|
| P17980                                                                              | 2             | 2.8721           | R.QTYFLPVIQLVDAEK.L            | 1            | PRS6A_HUMAN          |
| <b><i>26S protease regulatory subunit 6B - Homo sapiens (Human)</i></b>             |               |                  |                                |              |                      |
| P43686                                                                              | 2             | 2.8748           | K.ENAPAIIFIDEIDAIATK.R         | 1            | PRS6B_HUMAN          |
| <b><i>26S protease regulatory subunit 7 - Homo sapiens (Human)</i></b>              |               |                  |                                |              |                      |
| P35998                                                                              | 2             | 2.7814           | K.TYQQSTYSR.Q                  | 1            | PRS7_HUMAN           |
| P35998                                                                              | 2             | 4.373            | K.FVVDLSQVAPTIDIEEGMR.V        | 1            | PRS7_HUMAN           |
| P35998                                                                              | 2             | 3.1875           | K.QVEDDIQQLLK.K                | 1            | PRS7_HUMAN           |
| <b><i>26S proteasome non-ATPase regulatory subunit 2 - Homo sapiens (Human)</i></b> |               |                  |                                |              |                      |
| Q13200                                                                              | 3             | 5.1684           | K.APVQPQQSPAAAPGGTDEKPSGK.E    | 3            | PSMD2_HUMAN          |
| <b><i>26S proteasome non-ATPase regulatory subunit 4 - Homo sapiens (Human)</i></b> |               |                  |                                |              |                      |
| P55036                                                                              | 3             | 4.9973           | R.RAAAASAAEAGIATTGTEDSDDALLK.M | 1            | PSMD4_HUMAN          |
| <b><i>26S proteasome non-ATPase regulatory subunit 9 - Homo sapiens (Human)</i></b> |               |                  |                                |              |                      |
| O00233                                                                              | 3             | 4.9145           | R.KLGQSESQGPPR.A               | 15           | PSMD9_HUMAN          |
| O00233                                                                              | 2             | 3.3974           | R.SDVLDLYQVR.T                 | 3            | PSMD9_HUMAN          |
| O00233                                                                              | 2             | 3.9598           | R.RKEEIEAQIK.A                 | 2            | PSMD9_HUMAN          |
| O00233                                                                              | 3             | 3.9835           | R.QSGGSSQAGAVTVSDVQELMR.R      | 1            | PSMD9_HUMAN          |
| O00233                                                                              | 2             | 4.5189           | K.LGQSESQGPPR.A                | 5            | PSMD9_HUMAN          |
| O00233                                                                              | 2             | 3.8677           | K.ANYDVLESQK.G                 | 3            | PSMD9_HUMAN          |
| O00233                                                                              | 2             | 2.8138           | R.QSGGSSQAGAVTVSDVQELM#R.R     | 1            | PSMD9_HUMAN          |
| <b><i>28 kDa heat- and acid-stable phosphoprotein - Homo sapiens (Human)</i></b>    |               |                  |                                |              |                      |
| Q13442                                                                              | 2             | 2.9831           | K.VTQLDLDGPK.E                 | 2            | HAP28_HUMAN          |
| Q13442                                                                              | 2             | 4.5              | K.GVEGLIDIENPNR.V              | 6            | HAP28_HUMAN          |
| Q13442                                                                              | 2             | 3.9476           | K.AKDDATLSGKR.M                | 4            | HAP28_HUMAN          |
| Q13442                                                                              | 1             | 2.2763           | K.DDATLSGK.R                   | 2            | HAP28_HUMAN          |
| Q13442                                                                              | 3             | 4.1371           | K.KSLDSDESEDEEDDYQQK.R         | 2            | HAP28_HUMAN          |
| Q13442                                                                              | 2             | 3.8251           | K.KVTQLDLDGPK.E                | 4            | HAP28_HUMAN          |
| Q13442                                                                              | 2             | 3.1524           | K.AKDDATLSGK.R                 | 5            | HAP28_HUMAN          |
| Q13442                                                                              | 3             | 3.9908           | R.EEEEQKEGGDGAAGDPK.K          | 1            | HAP28_HUMAN          |
| Q13442                                                                              | 2             | 4.2165           | R.EEEEQKEGGDGAAGDPK.E          | 2            | HAP28_HUMAN          |
| Q13442                                                                              | 2             | 3.799            | R.KAKDDATLSGK.R                | 3            | HAP28_HUMAN          |
| Q13442                                                                              | 2             | 5.3537           | R.QYTSPEEIDAQLQAEK.Q           | 6            | HAP28_HUMAN          |
| Q13442                                                                              | 2             | 5.1932           | R.KGVEGLIDIENPNR.V             | 8            | HAP28_HUMAN          |
| Q13442                                                                              | 3             | 3.7541           | K.KVTQLDLDGPKELSR.R            | 1            | HAP28_HUMAN          |
| Q13442                                                                              | 2             | 3.9452           | K.SLDSDESEDEEDDYQQK.R          | 6            | HAP28_HUMAN          |

Accession No\* Charge XC(Max)\*\* Peptide\* TC\*\*\* Reference No\*

**28S ribosomal protein S31, mitochondrial precursor - Homo sapiens (Human)**

|        |   |        |                             |   |            |
|--------|---|--------|-----------------------------|---|------------|
| Q92665 | 2 | 4.5838 | K.SELLSQLQQHEESR.A          | 1 | RT31_HUMAN |
| Q92665 | 3 | 6.1899 | R.TEETSKETSESQDSEKENTK.K    | 2 | RT31_HUMAN |
| Q92665 | 3 | 4.0201 | R.IEPLSPELVAAASAVADSLPFDK.Q | 1 | RT31_HUMAN |
| Q92665 | 2 | 3.5863 | K.ISFSNIISDMK.V             | 2 | RT31_HUMAN |
| Q92665 | 2 | 2.8564 | K.ISFSNIISDM#K.V            | 1 | RT31_HUMAN |
| Q92665 | 3 | 4.8661 | R.TEETSKETSESQDSEK.E        | 5 | RT31_HUMAN |

**2-amino-3-carboxymuconate-6-semialdehyde decarboxylase - Homo sapiens (Human)**

|        |   |        |                 |   |             |
|--------|---|--------|-----------------|---|-------------|
| Q8TDX5 | 2 | 3.4932 | K.AGNALAFGLER.K | 1 | ACMSD_HUMAN |
|--------|---|--------|-----------------|---|-------------|

**39S ribosomal protein L12, mitochondrial precursor - Homo sapiens (Human)**

|        |   |        |                        |    |            |
|--------|---|--------|------------------------|----|------------|
| P52815 | 2 | 3.4557 | R.LTEAKPVDKVK.L        | 2  | RM12_HUMAN |
| P52815 | 1 | 2.9727 | R.LTEAKPVDK.V          | 2  | RM12_HUMAN |
| P52815 | 2 | 4.4973 | K.NYIQGINLVQAK.K       | 10 | RM12_HUMAN |
| P52815 | 2 | 3.4414 | K.LVESLPQEIK.A         | 2  | RM12_HUMAN |
| P52815 | 3 | 4.291  | K.LIKEIKNYIQGINLVQAK.K | 1  | RM12_HUMAN |
| P52815 | 2 | 4.3514 | K.KLVESLPQEIK.A        | 5  | RM12_HUMAN |

**39S ribosomal protein L46, mitochondrial precursor - Homo sapiens (Human)**

|        |   |        |                          |   |            |
|--------|---|--------|--------------------------|---|------------|
| Q9H2W6 | 3 | 4.8155 | K.PLTPLQEEMASLLQQIEIER.S | 2 | RM46_HUMAN |
|--------|---|--------|--------------------------|---|------------|

**3-hydroxybutyrate dehydrogenase type 2 - Homo sapiens (Human)**

|        |   |        |                           |   |            |
|--------|---|--------|---------------------------|---|------------|
| Q9BUT1 | 2 | 3.7345 | K.SVAADFIQQGIR.C          | 1 | BDH2_HUMAN |
| Q9BUT1 | 3 | 5.3438 | K.VIILTAAQGGIGQAAALAFAR.E | 1 | BDH2_HUMAN |
| Q9BUT1 | 2 | 3.3283 | K.SGNIINMSSVASSVK.G       | 1 | BDH2_HUMAN |

**3-hydroxyisobutyrate dehydrogenase, mitochondrial precursor - Homo sapiens (Human)**

|        |   |        |                         |   |             |
|--------|---|--------|-------------------------|---|-------------|
| P31937 | 2 | 4.807  | K.DLGLAQDSATSTK.S       | 4 | 3HIDH_HUMAN |
| P31937 | 2 | 3.3125 | K.TPVGFIGLGNM#GNPMAK.N  | 1 | 3HIDH_HUMAN |
| P31937 | 2 | 4.6076 | K.TPVGFIGLGNMGNPM#AK.N  | 2 | 3HIDH_HUMAN |
| P31937 | 2 | 3.6604 | K.MGAVFM#DAPVSGGVGAAR.S | 2 | 3HIDH_HUMAN |
| P31937 | 2 | 5.2753 | K.MGAVFMDAPVSGGVGAAR.S  | 4 | 3HIDH_HUMAN |
| P31937 | 2 | 3.6561 | K.TPVGFIGLGNM#GNPM#AK.N | 1 | 3HIDH_HUMAN |

**3-hydroxyisobutyryl-CoA hydrolase, mitochondrial precursor - Homo sapiens (Human)**

|        |   |        |                  |   |             |
|--------|---|--------|------------------|---|-------------|
| Q6NVY1 | 2 | 2.9208 | K.LGYFLALTGFR.L  | 2 | HIBCH_HUMAN |
| Q6NVY1 | 2 | 3.7437 | K.EVTEEDLNNHFK.S | 3 | HIBCH_HUMAN |
| Q6NVY1 | 2 | 3.6536 | K.HTDAAEEVLLEK.K | 1 | HIBCH_HUMAN |

| <i>Accession No*</i>                                                                | <i>Charge</i> | <i>XC(Max)**</i> | <i>Peptide*</i>                | <i>TC***</i> | <i>Reference No*</i> |
|-------------------------------------------------------------------------------------|---------------|------------------|--------------------------------|--------------|----------------------|
| Q6NVY1                                                                              | 2             | 3.3634           | K.SLGSSDLKF.-                  | 2            | HIBCH_HUMAN          |
| Q6NVY1                                                                              | 2             | 2.9458           | K.TLQEVLTMEYR.L                | 1            | HIBCH_HUMAN          |
| Q6NVY1                                                                              | 2             | 3.3969           | K.FLNALTLNMIR.Q                | 2            | HIBCH_HUMAN          |
| Q6NVY1                                                                              | 2             | 3.3602           | R.AVLIDKDKQSPK.W               | 2            | HIBCH_HUMAN          |
| <b><i>3-ketoacyl-CoA thiolase, mitochondrial - Homo sapiens (Human)</i></b>         |               |                  |                                |              |                      |
| P42765                                                                              | 3             | 6.8381           | K.VSPETVDSVIMGNVLQSSSDAIYLAR.H | 1            | THIM_HUMAN           |
| P42765                                                                              | 2             | 4.2928           | K.AANDAGYFNDEM#APIEVK.T        | 5            | THIM_HUMAN           |
| P42765                                                                              | 2             | 3.7644           | R.TPFGAYGGLLK.D                | 3            | THIM_HUMAN           |
| P42765                                                                              | 2             | 2.8884           | R.SLDLDISK.T                   | 1            | THIM_HUMAN           |
| P42765                                                                              | 2             | 3.1225           | K.RTPFGAYGGLLK.D               | 2            | THIM_HUMAN           |
| P42765                                                                              | 2             | 4.0927           | K.AANDAGYFNDEMAPIEVK.T         | 2            | THIM_HUMAN           |
| P42765                                                                              | 2             | 3.4548           | K.DFTATDLSEFAAK.A              | 1            | THIM_HUMAN           |
| P42765                                                                              | 2             | 2.8879           | K.DMDLVEVNEAFAPQYLAVER.S       | 1            | THIM_HUMAN           |
| <b><i>3-ketoacyl-CoA thiolase, peroxisomal precursor - Homo sapiens (Human)</i></b> |               |                  |                                |              |                      |
| P09110                                                                              | 2             | 3.3309           | K.AEELGLPILGVLR.S              | 1            | THIK_HUMAN           |
| <b><i>3-mercaptopyruvate sulfurtransferase - Homo sapiens (Human)</i></b>           |               |                  |                                |              |                      |
| P25325                                                                              | 2             | 3.8129           | R.ARPEDVISEGR.G                | 2            | THTM_HUMAN           |
| <b><i>4.1G protein - Homo sapiens (Human)</i></b>                                   |               |                  |                                |              |                      |
| Q9H1C6                                                                              | 2             | 3.8905           | K.SSHETLNIVEEK.K               | 2            | Q9H1C6_HUMAN         |
| Q9H1C6                                                                              | 2             | 3.5596           | K.YLMPTIWTVEEK.A               | 2            | Q9H1C6_HUMAN         |
| <b><i>40S ribosomal protein S14 - Homo sapiens (Human)</i></b>                      |               |                  |                                |              |                      |
| P62263                                                                              | 2             | 3.3483           | R.IEDVTPIPSDSTR.R              | 2            | RS14_HUMAN           |
| <b><i>40S ribosomal protein S17 - Homo sapiens (Human)</i></b>                      |               |                  |                                |              |                      |
| P08708                                                                              | 2             | 4.1398           | K.LLDFGSLSNLQVTQPTVGM#NFK.T    | 2            | RS17_HUMAN           |
| <b><i>40S ribosomal protein S18 - Homo sapiens (Human)</i></b>                      |               |                  |                                |              |                      |
| P62269                                                                              | 2             | 2.8728           | R.AGELTEDEVER.V                | 2            | RS18_HUMAN           |
| <b><i>40S ribosomal protein S19 - Homo sapiens (Human)</i></b>                      |               |                  |                                |              |                      |
| P39019                                                                              | 3             | 3.9576           | K.HKELAPYDENWFYTR.A            | 2            | RS19_HUMAN           |
| P39019                                                                              | 2             | 3.8029           | K.LKVPEWVDTVK.L                | 2            | RS19_HUMAN           |
| P39019                                                                              | 2             | 3.8739           | R.IAGQVAAANK.K                 | 6            | RS19_HUMAN           |
| P39019                                                                              | 2             | 3.0025           | R.IAGQVAAANKK.H                | 2            | RS19_HUMAN           |
| P39019                                                                              | 2             | 3.3686           | R.VLQALEGLK.M                  | 2            | RS19_HUMAN           |
| P39019                                                                              | 2             | 3.6306           | K.DVNQQEFVR.A                  | 3            | RS19_HUMAN           |

| <i>Accession No*</i>                                                          | <i>Charge</i> | <i>XC(Max)**</i> | <i>Peptide*</i>        | <i>TC***</i> | <i>Reference No*</i> |
|-------------------------------------------------------------------------------|---------------|------------------|------------------------|--------------|----------------------|
| <b><i>40S ribosomal protein S20 - Homo sapiens (Human)</i></b>                |               |                  |                        |              |                      |
| P60866                                                                        | 2             | 3.3886           | R.LIDLHSPSEIVK.Q       | 4            | RS20_HUMAN           |
| <b><i>40S ribosomal protein S21 - Homo sapiens (Human)</i></b>                |               |                  |                        |              |                      |
| P63220                                                                        | 2             | 3.983            | R.MGESDDSILR.L         | 5            | RS21_HUMAN           |
| P63220                                                                        | 2             | 2.7361           | R.M#GESDDSILR.L        | 2            | RS21_HUMAN           |
| <b><i>40S ribosomal protein S25 - Homo sapiens (Human)</i></b>                |               |                  |                        |              |                      |
| P62851                                                                        | 2             | 3.8413           | R.DKLNNLVLFDK.A        | 3            | RS25_HUMAN           |
| P62851                                                                        | 2             | 3.098            | R.AALQELLSK.G          | 3            | RS25_HUMAN           |
| P62851                                                                        | 2             | 3.581            | K.LNNLVLFDK.A          | 2            | RS25_HUMAN           |
| P62851                                                                        | 1             | 2.3683           | K.GGDAPAAGEDA.-        | 2            | RS25_HUMAN           |
| <b><i>40S ribosomal protein S28 - Homo sapiens (Human)</i></b>                |               |                  |                        |              |                      |
| P62857                                                                        | 2             | 4.527            | K.GPVREGDVLTLLESER.E   | 2            | RS28_HUMAN           |
| P62857                                                                        | 1             | 3.0607           | R.VEFMDDTSR.S          | 4            | RS28_HUMAN           |
| P62857                                                                        | 2             | 3.048            | R.VEFM#DDTSR.S         | 1            | RS28_HUMAN           |
| P62857                                                                        | 2             | 3.3691           | R.EGDVLTLLSESERAR.R    | 1            | RS28_HUMAN           |
| <b><i>40S ribosomal protein S3 - Homo sapiens (Human)</i></b>                 |               |                  |                        |              |                      |
| P23396                                                                        | 2             | 3.4141           | K.DEILPTTPISEQK.G      | 1            | RS3_HUMAN            |
| P23396                                                                        | 2             | 3.5962           | K.GGKPEPPAMPQPVPTA.-   | 2            | RS3_HUMAN            |
| P23396                                                                        | 2             | 3.266            | K.GGKPEPPAM#PQPVPPTA.- | 1            | RS3_HUMAN            |
| <b><i>40S ribosomal protein S30 - Homo sapiens (Human)</i></b>                |               |                  |                        |              |                      |
| P62861                                                                        | 2             | 3.6258           | R.RFVNVVPTFGK.K        | 6            | RS30_HUMAN           |
| P62861                                                                        | 2             | 3.1193           | R.FVNVVPTFGK.K         | 1            | RS30_HUMAN           |
| <b><i>40S ribosomal protein S3a - Homo sapiens (Human)</i></b>                |               |                  |                        |              |                      |
| P61247                                                                        | 2             | 4.261            | K.LMELHGEGSSSGK.A      | 2            | RS3A_HUMAN           |
| P61247                                                                        | 2             | 3.6634           | K.ATGDETGAVER.A        | 2            | RS3A_HUMAN           |
| P61247                                                                        | 2             | 3.4709           | K.LM#ELHGEGSSSGK.A     | 1            | RS3A_HUMAN           |
| <b><i>40S ribosomal protein S9 - Homo sapiens (Human)</i></b>                 |               |                  |                        |              |                      |
| P46781                                                                        | 2             | 3.4501           | R.SPYGGGRPGR.V         | 3            | RS9_HUMAN            |
| P46781                                                                        | 2             | 3.2147           | K.KGQGAGAGDDEED.-      | 2            | RS9_HUMAN            |
| <b><i>45 kDa calcium-binding protein precursor - Homo sapiens (Human)</i></b> |               |                  |                        |              |                      |
| Q9BRK5                                                                        | 1             | 2.2712           | K.YSEFFTGSK.L          | 1            | CAB45_HUMAN          |
| Q9BRK5                                                                        | 1             | 2.1183           | K.LVDYAR.S             | 1            | CAB45_HUMAN          |

Accession No\* Charge XC(Max)\*\* Peptide\* TC\*\*\* Reference No\*

**4-aminobutyrate aminotransferase, mitochondrial precursor - Homo sapiens (Human)**

|        |   |        |                   |   |            |
|--------|---|--------|-------------------|---|------------|
| P80404 | 2 | 4.5025 | K.VDVEFDYDGPLMK.T | 2 | GABT_HUMAN |
| P80404 | 2 | 2.8566 | R.GNYLVDVDGNR.M   | 1 | GABT_HUMAN |

**4F2 cell-surface antigen heavy chain - Homo sapiens (Human)**

|        |   |        |                                    |   |           |
|--------|---|--------|------------------------------------|---|-----------|
| P08195 | 2 | 5.112  | K.IKVAEDEAEAAAAAK.F                | 4 | 4F2_HUMAN |
| P08195 | 2 | 4.8864 | R.IGDLQAFQGHGAGNLAGLK.G            | 5 | 4F2_HUMAN |
| P08195 | 2 | 2.8196 | K.EDFDSLLQSAK.K                    | 1 | 4F2_HUMAN |
| P08195 | 3 | 7.7706 | K.EVELNELEPEKQPMNAASGAAM#SLAGAEK.N | 1 | 4F2_HUMAN |
| P08195 | 3 | 6.1339 | K.ADLLLSTQPGREEGSPLER.L            | 4 | 4F2_HUMAN |
| P08195 | 3 | 5.734  | R.SLLHGDFHAFSAGPGLFSYIR.H          | 5 | 4F2_HUMAN |
| P08195 | 2 | 4.5919 | K.GQSEDPGSLLSLFR.R                 | 6 | 4F2_HUMAN |
| P08195 | 2 | 3.0446 | K.FTGLSKEELLK.V                    | 1 | 4F2_HUMAN |
| P08195 | 2 | 4.547  | R.LLTSFLPAQLLR.L                   | 4 | 4F2_HUMAN |
| P08195 | 2 | 3.5758 | R.VILDLTPTYR.G                     | 2 | 4F2_HUMAN |
| P08195 | 2 | 5.2151 | K.VAEDEAEAAAAAK.F                  | 4 | 4F2_HUMAN |

**4-hydroxyphenylpyruvate dioxygenase - Homo sapiens (Human)**

|        |   |       |                 |   |            |
|--------|---|-------|-----------------|---|------------|
| P32754 | 2 | 3.637 | K.AFEFEEQNL.R.G | 3 | HPPD_HUMAN |
|--------|---|-------|-----------------|---|------------|

**5'-3' exoribonuclease 1 - Homo sapiens (Human)**

|        |   |        |                           |   |            |
|--------|---|--------|---------------------------|---|------------|
| Q8IZH2 | 3 | 4.8956 | K.EAQSSQATPVQTSQPSSNIVK.V | 2 | XRN1_HUMAN |
|--------|---|--------|---------------------------|---|------------|

**55 kDa erythrocyte membrane protein - Homo sapiens (Human)**

|        |   |        |                 |   |            |
|--------|---|--------|-----------------|---|------------|
| Q00013 | 2 | 3.5949 | K.VTEEPMGITLK.L | 2 | EM55_HUMAN |
|--------|---|--------|-----------------|---|------------|

**5-aminolevulinatase synthase, nonspecific, mitochondrial precursor - Homo sapiens (Human)**

|        |   |        |                                    |   |            |
|--------|---|--------|------------------------------------|---|------------|
| P13196 | 3 | 4.0772 | K.VQQTPDGSQQSPDGTQLPSGHPLPATSQGT.A | 1 | HEM1_HUMAN |
|--------|---|--------|------------------------------------|---|------------|

**5-azacytidine-induced protein 1 - Homo sapiens (Human)**

|        |   |        |               |   |            |
|--------|---|--------|---------------|---|------------|
| Q9UPN4 | 2 | 2.7233 | R.QRAELEELR.Q | 1 | AZI1_HUMAN |
|--------|---|--------|---------------|---|------------|

**60 kDa heat shock protein, mitochondrial precursor - Homo sapiens (Human)**

|        |   |        |                                     |   |            |
|--------|---|--------|-------------------------------------|---|------------|
| P10809 | 2 | 2.8315 | K.IGIEIILK.R                        | 2 | CH60_HUMAN |
| P10809 | 3 | 5.8833 | K.RIQEIIQLDVTTSEYEKEK.L             | 2 | CH60_HUMAN |
| P10809 | 2 | 3.0827 | K.VGGTSDVEVNEKKDR.V                 | 1 | CH60_HUMAN |
| P10809 | 2 | 3.5532 | K.LSDGVAVLK.V                       | 6 | CH60_HUMAN |
| P10809 | 3 | 5.0211 | K.DM#AIATGGAVFGEEGLTLNLEDVQPHDLGK.V | 1 | CH60_HUMAN |
| P10809 | 2 | 3.6443 | K.ISSIQSIVPALEIANHR.K               | 1 | CH60_HUMAN |
| P10809 | 3 | 6.0597 | K.KISSIQSIVPALEIANHR.K              | 2 | CH60_HUMAN |



| <i>Accession No*</i>                                                 | <i>Charge</i> | <i>XC(Max)**</i> | <i>Peptide*</i>                   | <i>TC***</i> | <i>Reference No*</i> |
|----------------------------------------------------------------------|---------------|------------------|-----------------------------------|--------------|----------------------|
| P10809                                                               | 3             | 3.8075           | R.TLKIPAMTIK.N                    | 2            | CH60_HUMAN           |
| P10809                                                               | 2             | 4.3329           | K.NAGVEGSLIVEK.I                  | 4            | CH60_HUMAN           |
| P10809                                                               | 2             | 4.7143           | R.IQEIIQLDVTTSEYEK.E              | 3            | CH60_HUMAN           |
| P10809                                                               | 2             | 4.3223           | K.VGGTSDVEVNEK.K                  | 4            | CH60_HUMAN           |
| P10809                                                               | 2             | 3.998            | K.VGGTSDVEVNEKK.D                 | 2            | CH60_HUMAN           |
| P10809                                                               | 2             | 2.761            | K.VGLQVVAVK.A                     | 1            | CH60_HUMAN           |
| <b><i>60S acidic ribosomal protein P1 - Homo sapiens (Human)</i></b> |               |                  |                                   |              |                      |
| P05386                                                               | 2             | 4.2389           | K.AAGVNVEPFWPLFAK.A               | 4            | RLA1_HUMAN           |
| <b><i>60S acidic ribosomal protein P2 - Homo sapiens (Human)</i></b> |               |                  |                                   |              |                      |
| P05387                                                               | 3             | 5.3256           | K.KILDSVGIEADDDRINK.V             | 4            | RLA2_HUMAN           |
| P05387                                                               | 2             | 4.1352           | R.YVASYLLAALGGNSSPSAK.D           | 3            | RLA2_HUMAN           |
| P05387                                                               | 2             | 4.8434           | K.ILDSVGIEADDDRINK.V              | 6            | RLA2_HUMAN           |
| P05387                                                               | 2             | 4.1709           | K.ILDSVGIEADDDR.L                 | 2            | RLA2_HUMAN           |
| P05387                                                               | 3             | 5.164            | K.ILDSVGIEADDDRINKVISELNGK.N      | 1            | RLA2_HUMAN           |
| P05387                                                               | 3             | 5.2911           | K.LASVPAGGAVAVSAAPGSAAPAAGSAPAAEE | 1            | RLA2_HUMAN           |
| P05387                                                               | 3             | 4.0948           | K.LASVPAGGAVAVSAAPGSAAPAAGSAPAAEE | 2            | RLA2_HUMAN           |
| P05387                                                               | 1             | 2.6337           | K.VISELNGK.N                      | 4            | RLA2_HUMAN           |
| P05387                                                               | 2             | 5.2038           | K.NIEDVIAQGIGK.L                  | 11           | RLA2_HUMAN           |
| P05387                                                               | 2             | 5.1188           | K.LASVPAGGAVAVSAAPGSAAPAAGSAPAAEE | 2            | RLA2_HUMAN           |
| <b><i>60S ribosomal protein L13 - Homo sapiens (Human)</i></b>       |               |                  |                                   |              |                      |
| P26373                                                               | 2             | 5.1507           | R.AKEAAEQDVEK.K                   | 8            | RL13_HUMAN           |
| P26373                                                               | 2             | 3.1238           | R.VITEEEKNFK.A                    | 1            | RL13_HUMAN           |
| <b><i>60S ribosomal protein L17 - Homo sapiens (Human)</i></b>       |               |                  |                                   |              |                      |
| P18621                                                               | 2             | 3.3827           | K.EQIVPKPEEEVAQK.K                | 1            | RL17_HUMAN           |
| <b><i>60S ribosomal protein L19 - Homo sapiens (Human)</i></b>       |               |                  |                                   |              |                      |
| P84098                                                               | 2             | 3.0983           | K.TLSKEEETK.K                     | 4            | RL19_HUMAN           |
| P84098                                                               | 2             | 2.8769           | K.TLSKEEETKK.-                    | 1            | RL19_HUMAN           |
| <b><i>60S ribosomal protein L23 - Homo sapiens (Human)</i></b>       |               |                  |                                   |              |                      |
| P62829                                                               | 2             | 3.3494           | K.GSAITGPVAK.E                    | 2            | RL23_HUMAN           |
| P62829                                                               | 1             | 2.3847           | R.IASNAGSIA.-                     | 2            | RL23_HUMAN           |
| <b><i>60S ribosomal protein L23a - Homo sapiens (Human)</i></b>      |               |                  |                                   |              |                      |
| P62750                                                               | 2             | 3.1544           | K.KEAPAPPK.A                      | 3            | RL23A_HUMAN          |
| P62750                                                               | 2             | 4.2231           | K.KEAPAPPKAEAK.A                  | 2            | RL23A_HUMAN          |

| <i>Accession No*</i>                                                                    | <i>Charge</i> | <i>XC(Max)**</i> | <i>Peptide*</i>              | <i>TC***</i> | <i>Reference No*</i> |
|-----------------------------------------------------------------------------------------|---------------|------------------|------------------------------|--------------|----------------------|
| P62750                                                                                  | 2             | 3.6835           | R.LAPDYDALDVANK.I            | 5            | RL23A_HUMAN          |
| <b><i>60S ribosomal protein L24 - Homo sapiens (Human)</i></b>                          |               |                  |                              |              |                      |
| P83731                                                                                  | 2             | 4.6615           | R.AITGASLADIM#AK.R           | 3            | RL24_HUMAN           |
| P83731                                                                                  | 2             | 5.1307           | R.AITGASLADIMAK.R            | 4            | RL24_HUMAN           |
| <b><i>60S ribosomal protein L29 - Homo sapiens (Human)</i></b>                          |               |                  |                              |              |                      |
| P47914                                                                                  | 2             | 4.7695           | K.AQAAAPASVPAQAPK.R          | 8            | RL29_HUMAN           |
| <b><i>60S ribosomal protein L31 - Homo sapiens (Human)</i></b>                          |               |                  |                              |              |                      |
| P62899                                                                                  | 2             | 4.8879           | K.LYTLVTVVPTTFK.N            | 1            | RL31_HUMAN           |
| <b><i>60S ribosomal protein L36a - Homo sapiens (Human)</i></b>                         |               |                  |                              |              |                      |
| P83881                                                                                  | 2             | 3.1433           | K.GKDSLYAQGK.R               | 1            | RL36A_HUMAN          |
| <b><i>60S ribosomal protein L36a-like - Homo sapiens (Human)</i></b>                    |               |                  |                              |              |                      |
| Q969Q0                                                                                  | 2             | 3.1559           | K.GKDSLYAQGR.R               | 2            | RL36L_HUMAN          |
| <b><i>60S ribosomal protein L38 - Homo sapiens (Human)</i></b>                          |               |                  |                              |              |                      |
| P63173                                                                                  | 2             | 3.9969           | R.YLYTLVITDKEK.A             | 2            | RL38_HUMAN           |
| P63173                                                                                  | 2             | 3.8906           | K.IEEIKDFLLTAR.R             | 3            | RL38_HUMAN           |
| P63173                                                                                  | 3             | 4.4092           | R.KIEEIKDFLLTAR.R            | 2            | RL38_HUMAN           |
| <b><i>60S ribosomal protein L4 - Homo sapiens (Human)</i></b>                           |               |                  |                              |              |                      |
| P36578                                                                                  | 2             | 4.7781           | K.AAAAAALQAK.S               | 1            | RL4_HUMAN            |
| P36578                                                                                  | 3             | 4.5575           | K.APIRPDIVNFVHTNLR.K         | 2            | RL4_HUMAN            |
| <b><i>60S ribosomal protein L5 - Homo sapiens (Human)</i></b>                           |               |                  |                              |              |                      |
| P46777                                                                                  | 2             | 3.3206           | K.GAVDGGLSIPHSTK.R           | 2            | RL5_HUMAN            |
| <b><i>65 kDa Yes-associated protein - Homo sapiens (Human)</i></b>                      |               |                  |                              |              |                      |
| P46937                                                                                  | 2             | 2.8152           | R.QVRPQELALR.S               | 1            | YAP1_HUMAN           |
| <b><i>A kinase - Homo sapiens (Human)</i></b>                                           |               |                  |                              |              |                      |
| Q5T721                                                                                  | 2             | 3.5271           | R.AAGVGWENVLLK.E             | 1            | Q5T721_HUMAN         |
| <b><i>A kinase anchor protein 1, mitochondrial precursor - Homo sapiens (Human)</i></b> |               |                  |                              |              |                      |
| Q92667                                                                                  | 2             | 3.9566           | R.KVQPGYPVPAEK.R             | 2            | AKAP1_HUMAN          |
| Q92667                                                                                  | 2             | 4.6511           | R.ARETGGAEGTGDAVLGEK.V       | 1            | AKAP1_HUMAN          |
| Q92667                                                                                  | 2             | 3.7381           | R.ETGGAEGTGDAVLGEK.V         | 2            | AKAP1_HUMAN          |
| Q92667                                                                                  | 3             | 4.9074           | R.KVQPGYPVPAEKR.S            | 2            | AKAP1_HUMAN          |
| Q92667                                                                                  | 2             | 3.1995           | K.DDAAPAPPVADAK.A            | 3            | AKAP1_HUMAN          |
| Q92667                                                                                  | 3             | 4.8637           | R.AAFQIISQVISEATEQVLATTVGK.V | 1            | AKAP1_HUMAN          |

| <i>Accession No*</i>                                                                               | <i>Charge</i> | <i>XC(Max)**</i> | <i>Peptide*</i>              | <i>TC***</i> | <i>Reference No*</i> |
|----------------------------------------------------------------------------------------------------|---------------|------------------|------------------------------|--------------|----------------------|
| Q92667                                                                                             | 3             | 3.853            | R.FIESAHTELAKDDAAPAPPVADAK.A | 1            | AKAP1_HUMAN          |
| <b><i>Abhydrolase domain-containing protein 12 - Homo sapiens (Human)</i></b>                      |               |                  |                              |              |                      |
| Q8N2K0                                                                                             | 3             | 3.842            | K.RTEPVALEHER.C              | 1            | ABD12_HUMAN          |
| <b><i>ABI gene family member 3 - Homo sapiens (Human)</i></b>                                      |               |                  |                              |              |                      |
| Q9P2A4                                                                                             | 2             | 2.9003           | K.VVTLYPYTSQK.D              | 1            | ABI3_HUMAN           |
| <b><i>Abl interactor 1 - Homo sapiens (Human)</i></b>                                              |               |                  |                              |              |                      |
| Q8IZP0                                                                                             | 2             | 3.1568           | R.VTGLFPGNYVESIMHYTD.-       | 1            | ABI1_HUMAN           |
| Q8IZP0                                                                                             | 2             | 3.662            | R.LGSQHSPGR.T                | 4            | ABI1_HUMAN           |
| Q8IZP0                                                                                             | 3             | 5.3509           | R.KPIDYTVLDDVGHGVK.W         | 2            | ABI1_HUMAN           |
| Q8IZP0                                                                                             | 2             | 4.4776           | R.HNSTTSSTSSGGYR.R           | 2            | ABI1_HUMAN           |
| Q8IZP0                                                                                             | 2             | 3.6007           | R.VTGLFPGNYVESIM#HYTD.-      | 4            | ABI1_HUMAN           |
| Q8IZP0                                                                                             | 2             | 3.0724           | R.ALIESYQNLTR.V              | 1            | ABI1_HUMAN           |
| <b><i>Absent in melanoma 1 protein - Homo sapiens (Human)</i></b>                                  |               |                  |                              |              |                      |
| Q9Y4K1                                                                                             | 2             | 3.588            | K.M#PLLELGGETTPPLSTER.S      | 1            | AIM1_HUMAN           |
| Q9Y4K1                                                                                             | 3             | 5.3618           | R.SFVLPVESTQDVSSQVIPESSEVR.E | 4            | AIM1_HUMAN           |
| Q9Y4K1                                                                                             | 2             | 4.7739           | K.MPLLELGGETTPPLSTER.S       | 2            | AIM1_HUMAN           |
| Q9Y4K1                                                                                             | 2             | 4.2592           | K.SLVLENVTDTAQDIPTTVDTK.D    | 2            | AIM1_HUMAN           |
| Q9Y4K1                                                                                             | 2             | 3.5504           | K.STDSPGADAELPESAAR.D        | 1            | AIM1_HUMAN           |
| Q9Y4K1                                                                                             | 2             | 3.9857           | K.VTVSEEEILPATR.G            | 1            | AIM1_HUMAN           |
| Q9Y4K1                                                                                             | 2             | 3.8828           | K.LLEKEDSEAADSK.S            | 3            | AIM1_HUMAN           |
| Q9Y4K1                                                                                             | 2             | 4.576            | R.AALDGGVASAASPESKPSPGTK.G   | 2            | AIM1_HUMAN           |
| Q9Y4K1                                                                                             | 2             | 4.5436           | K.GTAAESGEEAAR.A             | 5            | AIM1_HUMAN           |
| Q9Y4K1                                                                                             | 2             | 3.1429           | R.AAGAPGASDADGLKPR.N         | 1            | AIM1_HUMAN           |
| <b><i>Acetyl-CoA acetyltransferase, mitochondrial precursor - Homo sapiens (Human)</i></b>         |               |                  |                              |              |                      |
| P24752                                                                                             | 2             | 2.9906           | R.IVGHLTHALK.Q               | 1            | THIL_HUMAN           |
| <b><i>Acidic leucine-rich nuclear phosphoprotein 32 family member A - Homo sapiens (Human)</i></b> |               |                  |                              |              |                      |
| P39687                                                                                             | 2             | 4.1652           | R.KREPEDEGEDDD.-             | 37           | AN32A_HUMAN          |
| P39687                                                                                             | 2             | 3.2622           | K.REPEDEGEDDD.-              | 3            | AN32A_HUMAN          |
| <b><i>Actin filament-associated protein 1-like 2 - Homo sapiens (Human)</i></b>                    |               |                  |                              |              |                      |
| Q8N4X5                                                                                             | 2             | 3.159            | K.NRPLSVVTGK.G               | 2            | AF1L2_HUMAN          |
| Q8N4X5                                                                                             | 3             | 4.0545           | K.SSEEMGHWLGLLLSESGSK.T      | 1            | AF1L2_HUMAN          |
| <b><i>Actin-bundling protein with BAIAP2 homology - Homo sapiens (Human)</i></b>                   |               |                  |                              |              |                      |
| Q765P7                                                                                             | 2             | 3.1165           | R.NSNIAQNYR.R                | 2            | Q765P7_HUMAN         |

| <i>Accession No*</i>                                                                             | <i>Charge</i> | <i>XC(Max)**</i> | <i>Peptide*</i>               | <i>TC***</i> | <i>Reference No*</i> |
|--------------------------------------------------------------------------------------------------|---------------|------------------|-------------------------------|--------------|----------------------|
| <b><i>Actin-related protein 2/3 complex subunit 1A - Homo sapiens (Human)</i></b>                |               |                  |                               |              |                      |
| Q92747                                                                                           | 2             | 3.3832           | K.TLESSIQGLR.I                | 1            | ARC1A_HUMAN          |
| <b><i>Actin-related protein 2/3 complex subunit 1B - Homo sapiens (Human)</i></b>                |               |                  |                               |              |                      |
| O15143                                                                                           | 2             | 3.848            | K.ASSEGGTAAGAGLDSLHK.N        | 1            | ARC1B_HUMAN          |
| O15143                                                                                           | 2             | 3.7641           | K.NSVSQISVLSGGK.A             | 2            | ARC1B_HUMAN          |
| <b><i>Actin-related protein 2/3 complex subunit 3 - Homo sapiens (Human)</i></b>                 |               |                  |                               |              |                      |
| O15145                                                                                           | 2             | 2.9721           | K.LIGNMALLPIR.S               | 1            | ARPC3_HUMAN          |
| <b><i>Actin-related protein 2/3 complex subunit 5 - Homo sapiens (Human)</i></b>                 |               |                  |                               |              |                      |
| O15511                                                                                           | 2             | 3.4255           | K.ALAAGGVGSIVR.V              | 1            | ARPC5_HUMAN          |
| <b><i>Actin-related protein 2/3 complex subunit 5-like protein - Homo sapiens (Human)</i></b>    |               |                  |                               |              |                      |
| Q9BPX5                                                                                           | 2             | 3.4642           | K.ALAVGGLGSIIR.V              | 1            | ARP5L_HUMAN          |
| <b><i>Activated RNA polymerase II transcriptional coactivator p15 - Homo sapiens (Human)</i></b> |               |                  |                               |              |                      |
| P53999                                                                                           | 3             | 6.321            | R.KGISLNPEQWSQLKEQISDIDDAVR.K | 1            | TCP4_HUMAN           |
| P53999                                                                                           | 3             | 4.9323           | K.GISLNPEQWSQLKEQISDIDDAVR.K  | 2            | TCP4_HUMAN           |
| P53999                                                                                           | 2             | 4.5822           | K.GISLNPEQWSQLK.E             | 2            | TCP4_HUMAN           |
| P53999                                                                                           | 2             | 3.538            | R.DDNMFQIGK.M                 | 3            | TCP4_HUMAN           |
| <b><i>Activating signal cointegrator 1 - Homo sapiens (Human)</i></b>                            |               |                  |                               |              |                      |
| Q15650                                                                                           | 2             | 2.9686           | K.GQFIEELITK.W                | 1            | TRIP4_HUMAN          |
| Q15650                                                                                           | 2             | 3.3185           | R.NRQEVPAFTEPDTTAEVK.T        | 1            | TRIP4_HUMAN          |
| <b><i>Activity-dependent neuroprotector - Homo sapiens (Human)</i></b>                           |               |                  |                               |              |                      |
| Q9H2P0                                                                                           | 2             | 2.8737           | R.SYGLGSEQR.S                 | 1            | ADNP_HUMAN           |
| Q9H2P0                                                                                           | 2             | 2.8538           | R.IGSLASGNVR.S                | 1            | ADNP_HUMAN           |
| <b><i>Acyl carrier protein, mitochondrial precursor - Homo sapiens (Human)</i></b>               |               |                  |                               |              |                      |
| O14561                                                                                           | 1             | 2.2479           | R.VLYVLK.L                    | 1            | ACPM_HUMAN           |
| O14561                                                                                           | 3             | 4.5507           | K.LYDKIDPEKLSVNSHFM#K.D       | 6            | ACPM_HUMAN           |
| O14561                                                                                           | 2             | 3.4931           | K.LSVNSHFMK.D                 | 10           | ACPM_HUMAN           |
| O14561                                                                                           | 2             | 3.3309           | K.LSVNSHFM#K.D                | 8            | ACPM_HUMAN           |
| O14561                                                                                           | 2             | 3.3876           | K.LYDKIDPEK.L                 | 5            | ACPM_HUMAN           |
| O14561                                                                                           | 2             | 5.3369           | K.LYDKIDPEKLSVNSHFMK.D        | 6            | ACPM_HUMAN           |
| <b><i>Acylamino-acid-releasing enzyme - Homo sapiens (Human)</i></b>                             |               |                  |                               |              |                      |
| P13798                                                                                           | 2             | 4.6752           | R.QVLLSEPEEAAALYR.G           | 2            | ACPH_HUMAN           |
| <b><i>Acyl-CoA synthetase medium-chain family member 3 - Homo sapiens (Human)</i></b>            |               |                  |                               |              |                      |

| <i>Accession No*</i>                                                               | <i>Charge</i> | <i>XC(Max)**</i> | <i>Peptide*</i>                | <i>TC***</i> | <i>Reference No*</i> |
|------------------------------------------------------------------------------------|---------------|------------------|--------------------------------|--------------|----------------------|
| Q53FZ2                                                                             | 2             | 2.8658           | R.KVEFIQELPK.T                 | 2            | Q53FZ2_HUMAN         |
| <b><i>Acyl-CoA-binding domain-containing protein 5 - Homo sapiens (Human)</i></b>  |               |                  |                                |              |                      |
| Q5T8D3                                                                             | 3             | 3.7703           | K.RGGETDEFSNVRR.G              | 1            | ACBD5_HUMAN          |
| <b><i>ADAM 10 precursor - Homo sapiens (Human)</i></b>                             |               |                  |                                |              |                      |
| O14672                                                                             | 3             | 3.7234           | R.RPPQPIQQPQR.Q                | 1            | ADA10_HUMAN          |
| <b><i>ADAMTS-12 precursor - Homo sapiens (Human)</i></b>                           |               |                  |                                |              |                      |
| P58397                                                                             | 1             | 2.1036           | R.NCSGGFKIR.E                  | 1            | ATS12_HUMAN          |
| <b><i>Adaptin ear-binding coat-associated protein 1 - Homo sapiens (Human)</i></b> |               |                  |                                |              |                      |
| Q8NC96                                                                             | 2             | 2.9517           | R.GGGLSLLPPPPGGK.V             | 1            | NECP1_HUMAN          |
| <b><i>Adaptor protein HOF1 - Homo sapiens (Human)</i></b>                          |               |                  |                                |              |                      |
| A1X283                                                                             | 2             | 3.2459           | R.DQDEM#NLER.G                 | 2            | A1X283_HUMAN         |
| <b><i>Adenomatous polyposis coli protein - Homo sapiens (Human)</i></b>            |               |                  |                                |              |                      |
| P25054                                                                             | 2             | 3.1967           | R.SPTGNTPPVIDSVSEK.A           | 1            | APC_HUMAN            |
| P25054                                                                             | 3             | 4.3971           | K.VTSHELTSNQQSANK.T            | 2            | APC_HUMAN            |
| P25054                                                                             | 2             | 3.464            | R.HVDQPIDYSLK.Y                | 2            | APC_HUMAN            |
| P25054                                                                             | 2             | 3.1594           | K.TDSTESSGTQSPK.R              | 3            | APC_HUMAN            |
| <b><i>Adenylate cyclase type 9 - Homo sapiens (Human)</i></b>                      |               |                  |                                |              |                      |
| O60503                                                                             | 2             | 3.8064           | R.SPTDEIANLVPSVQYVVK.T         | 1            | ADCY9_HUMAN          |
| O60503                                                                             | 2             | 3.0938           | K.TSLGSDSSTQAK.D               | 2            | ADCY9_HUMAN          |
| <b><i>Adenylate kinase isoenzyme 2, mitochondrial - Homo sapiens (Human)</i></b>   |               |                  |                                |              |                      |
| P54819                                                                             | 1             | 2.6167           | R.AMVASGSELGK.K                | 1            | KAD2_HUMAN           |
| P54819                                                                             | 3             | 5.6758           | R.SYHEEFNPPKEPMKDDITGEPLIR.R   | 1            | KAD2_HUMAN           |
| P54819                                                                             | 2             | 2.8436           | R.AVLLGPPGAGK.G                | 3            | KAD2_HUMAN           |
| P54819                                                                             | 4             | 5.5478           | K.RGIHSAIDASQTPDVVFASILAAFSK.A | 1            | KAD2_HUMAN           |
| P54819                                                                             | 2             | 4.2163           | K.NGFLLDGFPR.T                 | 6            | KAD2_HUMAN           |
| P54819                                                                             | 2             | 4.6435           | K.LVSDEMVELIEK.N               | 5            | KAD2_HUMAN           |
| P54819                                                                             | 2             | 4.4195           | K.LVSDEM#VVELIEK.N             | 4            | KAD2_HUMAN           |
| P54819                                                                             | 2             | 4.3334           | R.LQAYHTQTTPLEIYYR.K           | 2            | KAD2_HUMAN           |
| <b><i>Adenylate kinase isoenzyme 4, mitochondrial - Homo sapiens (Human)</i></b>   |               |                  |                                |              |                      |
| P27144                                                                             | 2             | 2.8595           | K.IWPYVYTLFSNK.I               | 1            | KAD4_HUMAN           |
| <b><i>Adipophilin - Homo sapiens (Human)</i></b>                                   |               |                  |                                |              |                      |
| Q99541                                                                             | 2             | 3.4027           | K.DAVTTTTVTGAK.D               | 3            | ADFP_HUMAN           |

| <i>Accession No*</i>                                                                     | <i>Charge</i> | <i>XC(Max)**</i> | <i>Peptide*</i>                   | <i>TC***</i> | <i>Reference No*</i> |
|------------------------------------------------------------------------------------------|---------------|------------------|-----------------------------------|--------------|----------------------|
| <b><i>Adipose most abundant gene transcript 2 - Homo sapiens (Human)</i></b>             |               |                  |                                   |              |                      |
| Q15847                                                                                   | 3             | 4.4909           | K.QQVEGTAQEAVSAAGAAAQVVVDQATEAGQK | 5            | APM2_HUMAN           |
| Q15847                                                                                   | 2             | 5.6226           | K.TTQETIDKTANQASDTFSGIGK.K        | 8            | APM2_HUMAN           |
| Q15847                                                                                   | 2             | 3.8052           | K.TANQASDTFSGIGK.K                | 3            | APM2_HUMAN           |
| Q15847                                                                                   | 3             | 6.6056           | K.TTQETIDKTANQASDTFSGIGKK.F       | 13           | APM2_HUMAN           |
| Q15847                                                                                   | 2             | 4.291            | K.TANQASDTFSGIGKK.F               | 3            | APM2_HUMAN           |
| <b><i>Adipose specific 2 - Homo sapiens (Human)</i></b>                                  |               |                  |                                   |              |                      |
| Q5TBU2                                                                                   | 2             | 3.9496           | K.TTQETIDKTAN.-                   | 5            | Q5TBU2_HUMAN         |
| <b><i>ADM precursor [Contains: Adrenomedullin - Homo sapiens (Human)]</i></b>            |               |                  |                                   |              |                      |
| P35318                                                                                   | 2             | 3.6677           | R.SPEDSSPDAAR.I                   | 2            | ADML_HUMAN           |
| <b><i>ADP-ribose pyrophosphatase, mitochondrial precursor - Homo sapiens (Human)</i></b> |               |                  |                                   |              |                      |
| Q9BW91                                                                                   | 2             | 3.5803           | R.WGPNHAADPIITR.W                 | 2            | NUDT9_HUMAN          |
| Q9BW91                                                                                   | 2             | 3.2697           | R.EFGEEALNSLQK.T                  | 1            | NUDT9_HUMAN          |
| Q9BW91                                                                                   | 2             | 2.7633           | K.LYASHSQFIK.L                    | 1            | NUDT9_HUMAN          |
| Q9BW91                                                                                   | 3             | 3.9733           | K.HILQFVAIKR.K                    | 2            | NUDT9_HUMAN          |
| Q9BW91                                                                                   | 2             | 3.8436           | K.LFSQDHLVIYK.G                   | 2            | NUDT9_HUMAN          |
| Q9BW91                                                                                   | 2             | 3.4443           | K.WVDINDKLL.L                     | 3            | NUDT9_HUMAN          |
| Q9BW91                                                                                   | 2             | 3.5655           | K.HILQFVAIK.R                     | 5            | NUDT9_HUMAN          |
| <b><i>ADP-ribosyl cyclase 2 precursor - Homo sapiens (Human)</i></b>                     |               |                  |                                   |              |                      |
| Q10588                                                                                   | 2             | 2.7964           | K.GFFADYEIPNLQK.E                 | 1            | BST1_HUMAN           |
| <b><i>ADP-ribosylation factor GTPase-activating protein 1 - Homo sapiens (Human)</i></b> |               |                  |                                   |              |                      |
| Q8N6T3                                                                                   | 2             | 5.7887           | K.IFDDVSSGSVQLASK.V               | 5            | ARFG1_HUMAN          |
| Q8N6T3                                                                                   | 3             | 4.7951           | K.ASELGHSLNENVLKPAQEK.V           | 2            | ARFG1_HUMAN          |
| <b><i>ADP-ribosylation factor GTPase-activating protein 3 - Homo sapiens (Human)</i></b> |               |                  |                                   |              |                      |
| Q9NP61                                                                                   | 3             | 4.5315           | R.KKYNDSDSDSYFTSSSSYFDEPVELR.S    | 1            | ARFG3_HUMAN          |
| Q9NP61                                                                                   | 2             | 2.8374           | K.ETSKDTETVLK.T                   | 1            | ARFG3_HUMAN          |
| Q9NP61                                                                                   | 3             | 4.5166           | R.RKPDYEPVENTDEAQK.K              | 2            | ARFG3_HUMAN          |
| Q9NP61                                                                                   | 2             | 3.5382           | K.AISSDMYFGR.Q                    | 2            | ARFG3_HUMAN          |
| Q9NP61                                                                                   | 2             | 3.2516           | R.LAYKDLEIQMK.K                   | 1            | ARFG3_HUMAN          |
| <b><i>ADP-ribosylation factor-like protein 3 - Homo sapiens (Human)</i></b>              |               |                  |                                   |              |                      |
| P36405                                                                                   | 2             | 3.8711           | R.ILLLGLDNAGK.T                   | 2            | ARL3_HUMAN           |
| P36405                                                                                   | 2             | 3.0192           | K.LNVWDIGGQR.K                    | 2            | ARL3_HUMAN           |
| <b><i>ADP-sugar pyrophosphatase - Homo sapiens (Human)</i></b>                           |               |                  |                                   |              |                      |

| <i>Accession No*</i>                                                          | <i>Charge</i> | <i>XC(Max)**</i> | <i>Peptide*</i>               | <i>TC***</i> | <i>Reference No*</i> |
|-------------------------------------------------------------------------------|---------------|------------------|-------------------------------|--------------|----------------------|
| Q9UUK9                                                                        | 2             | 3.9959           | K.EQTADGVAVIPVLQR.T           | 1            | NUDT5_HUMAN          |
| Q9UUK9                                                                        | 3             | 5.4516           | K.PKPGDGEFVEVISLPK.N          | 2            | NUDT5_HUMAN          |
| Q9UUK9                                                                        | 2             | 2.8055           | R.VYSYALALK.H                 | 1            | NUDT5_HUMAN          |
| <b><i>Adrenodoxin, mitochondrial precursor - Homo sapiens (Human)</i></b>     |               |                  |                               |              |                      |
| P10109                                                                        | 1             | 3.2477           | R.DGETLTTK.G                  | 14           | ADX_HUMAN            |
| P10109                                                                        | 2             | 4.1914           | R.SSSEDKITVHFINR.D            | 3            | ADX_HUMAN            |
| P10109                                                                        | 2             | 2.9826           | K.ITVHFINR.D                  | 3            | ADX_HUMAN            |
| P10109                                                                        | 3             | 4.6251           | K.SMDNMTVRVPETVADAR.Q         | 1            | ADX_HUMAN            |
| P10109                                                                        | 2             | 3.3673           | R.VPETVADAR.Q                 | 9            | ADX_HUMAN            |
| P10109                                                                        | 2             | 2.8869           | K.SMDNMTVR.V                  | 2            | ADX_HUMAN            |
| P10109                                                                        | 3             | 3.823            | K.SM#DNMTVRVPETVADAR.Q        | 1            | ADX_HUMAN            |
| P10109                                                                        | 2             | 3.2089           | K.LDAITDEENDMLDLAYGLTDR.S     | 4            | ADX_HUMAN            |
| P10109                                                                        | 2             | 2.9829           | K.SM#DNMTVR.V                 | 1            | ADX_HUMAN            |
| <b><i>AF4/FMR2 family member 4 - Homo sapiens (Human)</i></b>                 |               |                  |                               |              |                      |
| Q9UHB7                                                                        | 2             | 2.8243           | K.WQLDNWLNK.V                 | 1            | AFF4_HUMAN           |
| <b><i>Afadin - Homo sapiens (Human)</i></b>                                   |               |                  |                               |              |                      |
| P55196                                                                        | 2             | 4.0891           | R.DYEPPSPSPAPGAPPPPPQR.N      | 6            | AFAD_HUMAN           |
| P55196                                                                        | 2             | 3.5911           | R.RQEEGYYSR.L                 | 5            | AFAD_HUMAN           |
| P55196                                                                        | 3             | 4.4051           | K.RRQEEGYYSR.L                | 2            | AFAD_HUMAN           |
| P55196                                                                        | 2             | 3.244            | K.TQVLSPDSLFTAK.F             | 2            | AFAD_HUMAN           |
| <b><i>Afamin precursor - Homo sapiens (Human)</i></b>                         |               |                  |                               |              |                      |
| P43652                                                                        | 2             | 2.8705           | K.IAPQLSTEELVSLGEK.M          | 1            | AFAM_HUMAN           |
| <b><i>Aflatoxin B1 aldehyde reductase member 3 - Homo sapiens (Human)</i></b> |               |                  |                               |              |                      |
| O95154                                                                        | 2             | 4.724            | R.FYAFNPLAGLLTGK.Y            | 1            | ARK73_HUMAN          |
| <b><i>Aftiphilin - Homo sapiens (Human)</i></b>                               |               |                  |                               |              |                      |
| Q6ULP2                                                                        | 2             | 3.3596           | K.SSGTGTEPVAK.L               | 1            | AFTIN_HUMAN          |
| Q6ULP2                                                                        | 2             | 3.1392           | K.AWSLVDSADNSEAIRR.E          | 1            | AFTIN_HUMAN          |
| Q6ULP2                                                                        | 2             | 4.8511           | K.QGLPTLQQDEFLLQSGVQSK.A      | 2            | AFTIN_HUMAN          |
| Q6ULP2                                                                        | 2             | 3.8227           | R.TNMNVVHQNK.Q                | 4            | AFTIN_HUMAN          |
| Q6ULP2                                                                        | 2             | 3.6553           | K.VLM#FPATLTPSTSSQEKADG.-     | 1            | AFTIN_HUMAN          |
| Q6ULP2                                                                        | 3             | 4.3767           | R.KFTNFQSPNIDPTEENDLDDSLSVK.N | 1            | AFTIN_HUMAN          |
| Q6ULP2                                                                        | 2             | 3.1001           | K.TSDDEVGSPK.E                | 4            | AFTIN_HUMAN          |
| Q6ULP2                                                                        | 2             | 3.2091           | R.TNM#NVVHQNK.Q               | 1            | AFTIN_HUMAN          |
| Q6ULP2                                                                        | 2             | 2.9684           | K.TEEKLDLLTSK.C               | 1            | AFTIN_HUMAN          |

| <i>Accession No*</i>                                                       | <i>Charge</i> | <i>XC(Max)**</i> | <i>Peptide*</i>                    | <i>TC***</i> | <i>Reference No*</i> |
|----------------------------------------------------------------------------|---------------|------------------|------------------------------------|--------------|----------------------|
| Q6ULP2                                                                     | 2             | 3.4547           | K.GQSDVLLSTTSK.E                   | 2            | AFTIN_HUMAN          |
| <b><i>Aggrecan core protein precursor - Homo sapiens (Human)</i></b>       |               |                  |                                    |              |                      |
| P16112                                                                     | 3             | 4.149            | K.VSLPNYPAIPSDATLEVQSLR.S          | 1            | PGCA_HUMAN           |
| <b><i>Agmatinase, mitochondrial precursor - Homo sapiens (Human)</i></b>   |               |                  |                                    |              |                      |
| Q9BSE5                                                                     | 2             | 2.8401           | K.SLVPLMGEVR.Q                     | 2            | SPEB_HUMAN           |
| Q9BSE5                                                                     | 2             | 2.7323           | R.RIQEAYEK.I                       | 2            | SPEB_HUMAN           |
| Q9BSE5                                                                     | 3             | 4.0058           | R.LPVQTSPEGLDAAFIGVPLDTGTSNRPGAR.F | 1            | SPEB_HUMAN           |
| <b><i>Agrin precursor - Homo sapiens (Human)</i></b>                       |               |                  |                                    |              |                      |
| O00468                                                                     | 3             | 4.2697           | R.IFFVNPAPPYLWPAHK.N               | 1            | AGRIN_HUMAN          |
| <b><i>AHNAK protein - Homo sapiens (Human)</i></b>                         |               |                  |                                    |              |                      |
| Q9BVU3                                                                     | 2             | 4.1744           | R.DDGVFVQEVTQNSPAAR.T              | 11           | Q9BVU3_HUMAN         |
| Q9BVU3                                                                     | 2             | 2.9787           | R.SPEPGQWTR.E                      | 2            | Q9BVU3_HUMAN         |
| <b><i>A-kinase anchor protein 11 - Homo sapiens (Human)</i></b>            |               |                  |                                    |              |                      |
| Q9UKA4                                                                     | 2             | 2.7467           | K.ESLPVSGEESQLTPEK.S               | 1            | AKA11_HUMAN          |
| <b><i>A-kinase anchor protein 13 - Homo sapiens (Human)</i></b>            |               |                  |                                    |              |                      |
| Q12802                                                                     | 3             | 3.9931           | R.KGEEVEPAPIVDVSDQDSCQLPDCGVK      | 1            | AKP13_HUMAN          |
| Q12802                                                                     | 3             | 5.9082           | R.SREESADAPVDQNSVVIPAAAK.D         | 3            | AKP13_HUMAN          |
| Q12802                                                                     | 2             | 3.4571           | K.NAVLGLPVALQDK.A                  | 1            | AKP13_HUMAN          |
| Q12802                                                                     | 2             | 2.9857           | K.GLESATFEK.V                      | 1            | AKP13_HUMAN          |
| Q12802                                                                     | 2             | 5.3841           | K.ALQLSNSPGASSAFLK.A               | 2            | AKP13_HUMAN          |
| Q12802                                                                     | 2             | 2.9628           | K.SSGMPTDQESLSSGDAVLQR.D           | 2            | AKP13_HUMAN          |
| <b><i>A-kinase anchor protein 9 - Homo sapiens (Human)</i></b>             |               |                  |                                    |              |                      |
| Q99996                                                                     | 2             | 3.8771           | K.EVEIDQLNEQVTK.L                  | 1            | AKAP9_HUMAN          |
| Q99996                                                                     | 3             | 5.8786           | K.LALEQQVETANEEMTFMK.N             | 4            | AKAP9_HUMAN          |
| Q99996                                                                     | 2             | 2.7092           | K.VTEEGTELSQR.L                    | 1            | AKAP9_HUMAN          |
| Q99996                                                                     | 3             | 4.1683           | R.LQELEQENKLFKDDMEK.L              | 1            | AKAP9_HUMAN          |
| Q99996                                                                     | 2             | 3.2894           | R.NREEEIEQLNEVIEK.L                | 1            | AKAP9_HUMAN          |
| <b><i>Alcohol dehydrogenase [NADP+] - Homo sapiens (Human)</i></b>         |               |                  |                                    |              |                      |
| P14550                                                                     | 2             | 4.1587           | K.GLVQALGLSNFNSR.Q                 | 2            | AK1A1_HUMAN          |
| P14550                                                                     | 2             | 4.0723           | K.VFDFTFSPEEMK.Q                   | 4            | AK1A1_HUMAN          |
| <b><i>Alpha-1-acid glycoprotein 1 precursor - Homo sapiens (Human)</i></b> |               |                  |                                    |              |                      |
| P02763                                                                     | 2             | 3.8661           | K.EQLGEFYEALDCLR.I                 | 2            | A1AG1_HUMAN          |
| P02763                                                                     | 1             | 3.2814           | K.SDVVYTDWK.K                      | 9            | A1AG1_HUMAN          |



| <i>Accession No*</i>                                                       | <i>Charge</i> | <i>XC(Max)**</i> | <i>Peptide*</i>                  | <i>TC***</i> | <i>Reference No*</i> |
|----------------------------------------------------------------------------|---------------|------------------|----------------------------------|--------------|----------------------|
| P02763                                                                     | 1             | 3.3673           | K.SDVVYTDWKK.D                   | 6            | A1AG1_HUMAN          |
| P02763                                                                     | 2             | 5.3764           | R.YVGGQEHFHLLLR.D                | 5            | A1AG1_HUMAN          |
| P02763                                                                     | 3             | 4.6619           | K.TYMLAFDVNDEKNWGLSVYADKPETTK.E  | 1            | A1AG1_HUMAN          |
| P02763                                                                     | 2             | 3.1805           | K.TYMLAFDVNDEK.N                 | 2            | A1AG1_HUMAN          |
| P02763                                                                     | 2             | 2.9346           | K.TYM#LAFDVNDEK.N                | 1            | A1AG1_HUMAN          |
| <b><i>Alpha-1-acid glycoprotein 2 precursor - Homo sapiens (Human)</i></b> |               |                  |                                  |              |                      |
| P19652                                                                     | 2             | 3.1636           | R.SDVMYTDWK.K                    | 4            | A1AG2_HUMAN          |
| P19652                                                                     | 2             | 2.9359           | R.SDVM#YTDWK.K                   | 3            | A1AG2_HUMAN          |
| P19652                                                                     | 2             | 3.119            | R.SDVMYTDWKK.D                   | 1            | A1AG2_HUMAN          |
| P19652                                                                     | 3             | 3.772            | K.TLM#FGSYLDDEKNWGLSFYADKPETTK.E | 1            | A1AG2_HUMAN          |
| P19652                                                                     | 3             | 4.5968           | R.YEGGREHVAHLLFLR.D              | 3            | A1AG2_HUMAN          |
| <b><i>Alpha-1-antichymotrypsin precursor - Homo sapiens (Human)</i></b>    |               |                  |                                  |              |                      |
| P01011                                                                     | 2             | 2.7143           | R.NLAVSQVVK.A                    | 1            | AACT_HUMAN           |
| P01011                                                                     | 2             | 3.4113           | R.LYGSEAFATDFQDSAAAK.K           | 2            | AACT_HUMAN           |
| P01011                                                                     | 2             | 2.9301           | K.ITLLSALVETR.T                  | 1            | AACT_HUMAN           |
| <b><i>Alpha-1-antitrypsin precursor - Homo sapiens (Human)</i></b>         |               |                  |                                  |              |                      |
| P01009                                                                     | 2             | 3.4447           | K.KLSSWVLLMK.Y                   | 1            | A1AT_HUMAN           |
| P01009                                                                     | 3             | 5.2332           | R.TLNQPDSQLQLTTGNGLFLSEGLK.L     | 1            | A1AT_HUMAN           |
| P01009                                                                     | 3             | 4.4851           | K.LYHSEAFVNFQDTEEAQK.Q           | 2            | A1AT_HUMAN           |
| P01009                                                                     | 2             | 4.4276           | K.ITPNLAEFAFSLYR.Q               | 4            | A1AT_HUMAN           |
| <b><i>Alpha-2-antiplasmin precursor - Homo sapiens (Human)</i></b>         |               |                  |                                  |              |                      |
| P08697                                                                     | 3             | 3.7154           | R.GDKLFGPDLK.L                   | 1            | A2AP_HUMAN           |
| P08697                                                                     | 2             | 4.0871           | K.LGNQEPGGQTALK.S                | 3            | A2AP_HUMAN           |
| <b><i>Alpha-2-glycoprotein 1, zinc-binding - Homo sapiens (Human)</i></b>  |               |                  |                                  |              |                      |
| Q5XKQ4                                                                     | 3             | 6.8224           | K.NILDRQDPPSVVVTSHQAPGEK.K       | 6            | Q5XKQ4_HUMAN         |
| <b><i>Alpha-2-HS-glycoprotein precursor - Homo sapiens (Human)</i></b>     |               |                  |                                  |              |                      |
| P02765                                                                     | 1             | 2.4284           | K.FSVVYAK.C                      | 5            | FETUA_HUMAN          |
| P02765                                                                     | 3             | 6.1193           | R.HTFM#GVVSLGSPSGEVSHPR.K        | 4            | FETUA_HUMAN          |
| P02765                                                                     | 2             | 4.0268           | K.HTLNQIDEVK.V                   | 8            | FETUA_HUMAN          |
| P02765                                                                     | 3             | 6.0208           | R.HTFMGVVSLGSPSGEVSHPR.K         | 5            | FETUA_HUMAN          |
| <b><i>Alpha-2-macroglobulin precursor - Homo sapiens (Human)</i></b>       |               |                  |                                  |              |                      |
| P01023                                                                     | 3             | 4.0575           | K.DTVIKPLLVEPEGLEK.E             | 1            | A2MG_HUMAN           |
| P01023                                                                     | 2             | 3.6518           | K.HYDGSYSTFGER.Y                 | 2            | A2MG_HUMAN           |

| <i>Accession No*</i> | <i>Charge</i> | <i>XC(Max)**</i> | <i>Peptide*</i>        | <i>TC***</i> | <i>Reference No*</i> |
|----------------------|---------------|------------------|------------------------|--------------|----------------------|
| P01023               | 3             | 4.3716           | K.LHTEAQIQEETVVELTGR.Q | 2            | A2MG_HUMAN           |
| P01023               | 2             | 3.4089           | K.AIGYLNTGYQR.Q        | 2            | A2MG_HUMAN           |
| P01023               | 2             | 3.6093           | R.IAQWQSFQLEGGLK.Q     | 3            | A2MG_HUMAN           |
| P01023               | 2             | 4.2523           | K.QFSFPLSSEPFQGSYK.V   | 3            | A2MG_HUMAN           |

***Alpha-2-macroglobulin receptor-associated protein precursor - Homo sapiens (Human)***

|        |   |        |                         |    |            |
|--------|---|--------|-------------------------|----|------------|
| P30533 | 1 | 3.0063 | R.NLNVILAK.Y            | 5  | AMRP_HUMAN |
| P30533 | 3 | 5.3674 | R.RVSHQGYSTAEFEPR.V     | 3  | AMRP_HUMAN |
| P30533 | 2 | 5.1999 | K.LKLDGLDEDEGEKEAR.L    | 7  | AMRP_HUMAN |
| P30533 | 2 | 5.1694 | K.VHEYNVLLETLSR.T       | 5  | AMRP_HUMAN |
| P30533 | 2 | 3.6432 | R.HAESVGDGER.V          | 31 | AMRP_HUMAN |
| P30533 | 2 | 3.4158 | R.LAELHADLK.I           | 2  | AMRP_HUMAN |
| P30533 | 2 | 3.1282 | R.QVTSNSLSGTQEDGLDDPR.L | 2  | AMRP_HUMAN |
| P30533 | 2 | 4.0077 | K.LKLDGLDEDEGEK.E       | 2  | AMRP_HUMAN |
| P30533 | 2 | 3.6698 | R.TEEIHENVISPSDLSDIK.G  | 2  | AMRP_HUMAN |
| P30533 | 2 | 5.493  | R.VSHQGYSTAEFEPR.V      | 3  | AMRP_HUMAN |
| P30533 | 2 | 3.1276 | K.LDGLDEDEGEK.E         | 2  | AMRP_HUMAN |
| P30533 | 2 | 4.3474 | K.IQERDELAWKK.L         | 2  | AMRP_HUMAN |
| P30533 | 1 | 3.1644 | K.HLQDLSGR.I            | 5  | AMRP_HUMAN |
| P30533 | 2 | 2.8216 | K.HALLEGR.T             | 5  | AMRP_HUMAN |
| P30533 | 2 | 3.8389 | K.LDGLDEDEGEKEAR.L      | 5  | AMRP_HUMAN |
| P30533 | 1 | 2.9698 | K.LNQLWEK.A             | 5  | AMRP_HUMAN |
| P30533 | 3 | 3.8815 | K.KHLQDLSGR.I           | 2  | AMRP_HUMAN |
| P30533 | 2 | 2.7455 | R.TKELGYTVKK.H          | 1  | AMRP_HUMAN |
| P30533 | 2 | 4.2038 | K.FSGEELDKLWR.E         | 2  | AMRP_HUMAN |

***Alpha-actinin-4 - Homo sapiens (Human)***

|        |   |        |                       |   |             |
|--------|---|--------|-----------------------|---|-------------|
| O43707 | 3 | 3.9906 | K.HRDYETATLSDIK.A     | 1 | ACTN4_HUMAN |
| O43707 | 3 | 5.3178 | R.KDDPVTNLNNAFEVAEK.Y | 2 | ACTN4_HUMAN |
| O43707 | 2 | 4.7584 | K.DDPVTNLNNAFEVAEK.Y  | 1 | ACTN4_HUMAN |

***Alpha-aminoadipic semialdehyde dehydrogenase - Homo sapiens (Human)***

|        |   |        |                      |   |             |
|--------|---|--------|----------------------|---|-------------|
| P49419 | 2 | 3.8059 | -.MSTLLINQPQYAWLK.E  | 2 | AL7A1_HUMAN |
| P49419 | 2 | 4.0158 | -.M#STLLINQPQYAWLK.E | 2 | AL7A1_HUMAN |

***Alpha-crystallin A chain - Homo sapiens (Human)***

|        |   |        |                 |   |             |
|--------|---|--------|-----------------|---|-------------|
| P02489 | 2 | 3.2726 | K.VQDDFVEIHGK.H | 1 | CRYAA_HUMAN |
|--------|---|--------|-----------------|---|-------------|

***Alpha-crystallin B chain - Homo sapiens (Human)***

| <i>Accession No*</i> | <i>Charge</i> | <i>XC(Max)**</i> | <i>Peptide*</i>                 | <i>TC***</i> | <i>Reference No*</i> |
|----------------------|---------------|------------------|---------------------------------|--------------|----------------------|
| P02511               | 2             | 3.9307           | K.VLGDVIEVHGK.H                 | 2            | CRYAB_HUMAN          |
| P02511               | 2             | 4.5121           | R.APSWFDTGLSEMR.L               | 3            | CRYAB_HUMAN          |
| P02511               | 2             | 2.934            | R.KQVSGPER.T                    | 2            | CRYAB_HUMAN          |
| P02511               | 2             | 3.8262           | R.APSWFDTGLSEM#R.L              | 2            | CRYAB_HUMAN          |
| P02511               | 3             | 4.8167           | K.HFSPEELKVK.V                  | 2            | CRYAB_HUMAN          |
| P02511               | 3             | 4.1535           | K.YRIPADVPLTITSSLSSDGVLTVNGPR.K | 3            | CRYAB_HUMAN          |
| P02511               | 1             | 2.1913           | K.HFSPEELK.V                    | 1            | CRYAB_HUMAN          |

***Alpha-enolase - Homo sapiens (Human)***

|        |   |        |                         |   |            |
|--------|---|--------|-------------------------|---|------------|
| P06733 | 2 | 3.864  | K.LAM#QEFM#ILPVGAANFR.E | 1 | ENOA_HUMAN |
| P06733 | 2 | 3.2715 | K.LAMQEFM#ILPVGAANFR.E  | 1 | ENOA_HUMAN |
| P06733 | 3 | 3.9294 | R.SGKYDLDFKSPDDPSR.Y    | 1 | ENOA_HUMAN |

***Alpha-N-acetylgalactosaminide alpha-2,6-sialyltransferase 5 - Homo sapiens (Human)***

|        |   |        |                       |   |             |
|--------|---|--------|-----------------------|---|-------------|
| Q9BVH7 | 2 | 2.7992 | R.M#NDAPTRGYGRDVGNR.T | 1 | SIA7E_HUMAN |
|--------|---|--------|-----------------------|---|-------------|

***Alpha-N-acetylglucosaminidase precursor - Homo sapiens (Human)***

|        |   |        |                     |   |            |
|--------|---|--------|---------------------|---|------------|
| P54802 | 2 | 3.5017 | R.LLGPSPAADFSVSVR.A | 3 | ANAG_HUMAN |
|--------|---|--------|---------------------|---|------------|

***Alpha-protein kinase 1 - Homo sapiens (Human)***

|        |   |        |                      |   |             |
|--------|---|--------|----------------------|---|-------------|
| Q96QP1 | 2 | 3.0449 | K.DAKTGVCITALKTEIK.N | 1 | ALPK1_HUMAN |
|--------|---|--------|----------------------|---|-------------|

***Alpha-synuclein - Homo sapiens (Human)***

|        |   |        |                            |   |            |
|--------|---|--------|----------------------------|---|------------|
| P37840 | 2 | 4.3756 | K.TVEGAGSIAAATGFVKK.D      | 2 | SYUA_HUMAN |
| P37840 | 3 | 5.3605 | K.EQVTNVGGAVVTGVTAVAQK.T   | 2 | SYUA_HUMAN |
| P37840 | 2 | 6.2631 | K.TVEGAGSIAAATGFVK.K       | 3 | SYUA_HUMAN |
| P37840 | 3 | 4.0098 | K.TKEQVTNVGGAVVTGVTAVAQK.T | 1 | SYUA_HUMAN |

***Alpha-taxilin - Homo sapiens (Human)***

|        |   |        |                                   |   |             |
|--------|---|--------|-----------------------------------|---|-------------|
| P40222 | 2 | 3.4114 | R.TAQSGALRDVSEELSR.Q              | 2 | TXLNA_HUMAN |
| P40222 | 2 | 4.3309 | R.VQDLSAGGQGLTDSGPER.R            | 2 | TXLNA_HUMAN |
| P40222 | 3 | 4.641  | K.SSPGQPEAGPEGAQERPSQAAPAVEAEGPGS | 3 | TXLNA_HUMAN |
| P40222 | 2 | 2.9517 | R.SLKEEGVQR.A                     | 1 | TXLNA_HUMAN |
| P40222 | 2 | 2.779  | R.DVSEELSR.Q                      | 1 | TXLNA_HUMAN |

***Alsin - Homo sapiens (Human)***

|        |   |        |                      |   |            |
|--------|---|--------|----------------------|---|------------|
| Q96Q42 | 2 | 2.7703 | R.NIPSYPDTQAVNEYLR.K | 1 | ALS2_HUMAN |
|--------|---|--------|----------------------|---|------------|

***AMBIP protein precursor [Contains: Alpha-1-microglobulin - Homo sapiens (Human)]***

|        |   |        |                         |   |             |
|--------|---|--------|-------------------------|---|-------------|
| P02760 | 2 | 3.1735 | R.ETLLQDFR.V            | 6 | AMBIP_HUMAN |
| P02760 | 2 | 3.1838 | R.VVAQGVGIPEDSIFTMADR.G | 1 | AMBIP_HUMAN |

| <i>Accession No*</i>                                              | <i>Charge</i> | <i>XC(Max)**</i> | <i>Peptide*</i>             | <i>TC***</i> | <i>Reference No*</i> |
|-------------------------------------------------------------------|---------------|------------------|-----------------------------|--------------|----------------------|
| P02760                                                            | 3             | 5.438            | R.VVAQGVGIPEDSIFTM#ADR.G    | 1            | AMBP_HUMAN           |
| P02760                                                            | 2             | 4.2057           | R.AFIQLWAFDAVK.G            | 4            | AMBP_HUMAN           |
| <b><i>Aminoacylase-1 - Homo sapiens (Human)</i></b>               |               |                  |                             |              |                      |
| Q03154                                                            | 2             | 5.2508           | R.AGFALDEGIANPTDAFTVFYSER.S | 3            | ACY1_HUMAN           |
| Q03154                                                            | 2             | 3.6976           | R.AVGVPALGFSPM#NR.T         | 3            | ACY1_HUMAN           |
| Q03154                                                            | 2             | 4.2724           | R.AVGVPALGFSPMNR.T          | 5            | ACY1_HUMAN           |
| Q03154                                                            | 2             | 3.5272           | K.VVNSILAFR.E               | 4            | ACY1_HUMAN           |
| <b><i>Aminopeptidase N - Homo sapiens (Human)</i></b>             |               |                  |                             |              |                      |
| P15144                                                            | 2             | 3.2162           | R.KIQTQLQR.D                | 5            | AMPN_HUMAN           |
| P15144                                                            | 2             | 4.1409           | R.YLSYTLNPDILR.K            | 6            | AMPN_HUMAN           |
| P15144                                                            | 2             | 3.3035           | R.VTLRPLYLTPNDR.G           | 1            | AMPN_HUMAN           |
| P15144                                                            | 2             | 3.41             | K.DLTALSNM#LPK.G            | 2            | AMPN_HUMAN           |
| P15144                                                            | 3             | 4.2633           | K.KQVTPLFIHFR.N             | 1            | AMPN_HUMAN           |
| P15144                                                            | 2             | 3.4998           | R.ENSLFDPLSSSSSNK.E         | 2            | AMPN_HUMAN           |
| P15144                                                            | 2             | 3.0424           | K.DLTALSNMLPK.G             | 2            | AMPN_HUMAN           |
| P15144                                                            | 2             | 3.4264           | K.DNEETGFGSGTR.A            | 2            | AMPN_HUMAN           |
| P15144                                                            | 3             | 4.0562           | R.KVVATTQM#QAADARK.S        | 1            | AMPN_HUMAN           |
| P15144                                                            | 2             | 3.3497           | K.EATDVIIIHSK.K             | 1            | AMPN_HUMAN           |
| P15144                                                            | 2             | 4.2238           | R.MLSSFLSEDFVK.Q            | 2            | AMPN_HUMAN           |
| P15144                                                            | 2             | 4.4255           | R.QYMPWEAALSSLSYFK.L        | 2            | AMPN_HUMAN           |
| P15144                                                            | 2             | 2.9318           | K.DLMVLNDVYR.V              | 2            | AMPN_HUMAN           |
| P15144                                                            | 2             | 4.5851           | R.KVVATTQM#QAADAR.K         | 1            | AMPN_HUMAN           |
| P15144                                                            | 3             | 3.8392           | R.KVVATTQMQAADARK.S         | 1            | AMPN_HUMAN           |
| P15144                                                            | 2             | 2.9316           | R.LPNTLKPDSYR.V             | 1            | AMPN_HUMAN           |
| P15144                                                            | 2             | 3.3588           | R.SEYMEGNVR.K               | 3            | AMPN_HUMAN           |
| P15144                                                            | 2             | 4.637            | K.EVVLQWFTENSK.-            | 3            | AMPN_HUMAN           |
| P15144                                                            | 2             | 4.2678           | R.AQIINDAFNLASAHK.V         | 2            | AMPN_HUMAN           |
| P15144                                                            | 2             | 2.7775           | R.ALEQALEK.T                | 4            | AMPN_HUMAN           |
| P15144                                                            | 2             | 4.9791           | K.VVATTQMQAADAR.K           | 4            | AMPN_HUMAN           |
| P15144                                                            | 2             | 4.4109           | K.VVATTQM#QAADAR.K          | 4            | AMPN_HUMAN           |
| P15144                                                            | 3             | 4                | K.LFNDYGGGFSFSNLIQAVTR.R    | 2            | AMPN_HUMAN           |
| P15144                                                            | 3             | 5.8777           | R.RFSTEYELQQLEQFKK.D        | 2            | AMPN_HUMAN           |
| <b><i>Amnionless protein precursor - Homo sapiens (Human)</i></b> |               |                  |                             |              |                      |
| Q9BXJ7                                                            | 2             | 5.0579           | R.NPVFDVTASEELPLPR.R        | 2            | AMNLS_HUMAN          |
| Q9BXJ7                                                            | 3             | 3.8834           | R.ALLADVAENGEALGVLEATMR.E   | 1            | AMNLS_HUMAN          |

Accession No\* Charge XC(Max)\*\* Peptide\* TC\*\*\* Reference No\*

***Amyloid beta A4 precursor protein-binding family A member 1 - Homo sapiens (Human)***

|        |   |        |                                     |   |             |
|--------|---|--------|-------------------------------------|---|-------------|
| Q02410 | 3 | 4.5553 | R.GEDEPYSEPYADYGGGLQEHVYEEIGDAPELDA | 1 | APBA1_HUMAN |
| Q02410 | 2 | 2.9737 | R.AVGPAAGGGEAGQR.Y                  | 1 | APBA1_HUMAN |

***Amyloid beta A4 precursor protein-binding family B member 2 - Homo sapiens (Human)***

|        |   |        |                    |   |             |
|--------|---|--------|--------------------|---|-------------|
| Q92870 | 2 | 2.8621 | K.SFLNYYADLETSAR.E | 1 | APBB2_HUMAN |
|--------|---|--------|--------------------|---|-------------|

***Amyloid beta A4 protein precursor - Homo sapiens (Human)***

|        |   |        |                            |   |          |
|--------|---|--------|----------------------------|---|----------|
| P05067 | 3 | 6.1315 | K.AVIQHFQEKVESLEQEAAANER.Q | 4 | A4_HUMAN |
|--------|---|--------|----------------------------|---|----------|

***ANI-type zinc finger protein 6 - Homo sapiens (Human)***

|        |   |        |                               |   |             |
|--------|---|--------|-------------------------------|---|-------------|
| Q6FIF0 | 3 | 7.1219 | K.AVPETEDVQASVSDTAQQPSEEQSK.S | 3 | ZFAN6_HUMAN |
|--------|---|--------|-------------------------------|---|-------------|

***Anamorsin - Homo sapiens (Human)***

|        |   |        |                      |   |             |
|--------|---|--------|----------------------|---|-------------|
| Q6FI81 | 2 | 3.1166 | K.SREQMSSQPK.S       | 5 | CPIN1_HUMAN |
| Q6FI81 | 3 | 4.5272 | K.ELQREPLTPEEVQSVR.E | 2 | CPIN1_HUMAN |
| Q6FI81 | 2 | 3.0294 | K.SSPSVKPAVDPAAAK.L  | 3 | CPIN1_HUMAN |
| Q6FI81 | 2 | 3.4348 | K.VLLSDSNLHDA.-      | 4 | CPIN1_HUMAN |

***Anaphase-promoting complex subunit CDC26 - Homo sapiens (Human)***

|        |   |        |                             |   |             |
|--------|---|--------|-----------------------------|---|-------------|
| Q8NHZ8 | 2 | 3.4418 | K.SREQMINDR.I               | 3 | CDC26_HUMAN |
| Q8NHZ8 | 3 | 5.8791 | K.QKEDVEVGGSDGEGAIGLSSDPK.S | 2 | CDC26_HUMAN |

***Androgen-induced proliferation inhibitor - Homo sapiens (Human)***

|        |   |        |                 |   |             |
|--------|---|--------|-----------------|---|-------------|
| Q9NTI5 | 3 | 3.9516 | K.SDKRDDSILVR.S | 1 | APRIN_HUMAN |
|--------|---|--------|-----------------|---|-------------|

***Angiotensinogen precursor - Homo sapiens (Human)***

|        |   |        |                             |   |            |
|--------|---|--------|-----------------------------|---|------------|
| P01019 | 3 | 3.8225 | K.VLSALQAVQGLLVAQGR.A       | 1 | ANGT_HUMAN |
| P01019 | 3 | 4.5913 | R.ADSQAQLLLSTVVGFTAPGLHLK.Q | 2 | ANGT_HUMAN |

***Anion exchange protein 2 - Homo sapiens (Human)***

|        |   |       |                                   |   |            |
|--------|---|-------|-----------------------------------|---|------------|
| P04920 | 3 | 6.249 | K.GAQAGTQVEEAEAEAVAVASGTAGGDDGGAS | 2 | B3A2_HUMAN |
|--------|---|-------|-----------------------------------|---|------------|

***ANK repeat and LEM domain-containing protein KIAA0692 - Homo sapiens (Human)***

|        |   |        |               |   |             |
|--------|---|--------|---------------|---|-------------|
| Q86XL3 | 2 | 3.7227 | R.RTESEMSAR.I | 2 | K0692_HUMAN |
|--------|---|--------|---------------|---|-------------|

***ANK2 protein - Homo sapiens (Human)***

|        |   |        |                               |   |              |
|--------|---|--------|-------------------------------|---|--------------|
| Q08AC8 | 2 | 3.3779 | K.TEGDSSATALFPQTHK.E          | 2 | Q08AC8_HUMAN |
| Q08AC8 | 3 | 4.5464 | K.TEGDSSATALFPQTHKEVQQDFSGK.M | 1 | Q08AC8_HUMAN |

***Ankycorbin - Homo sapiens (Human)***

|        |   |        |               |   |             |
|--------|---|--------|---------------|---|-------------|
| Q9P0K7 | 2 | 3.5814 | K.RLESSEAER.K | 5 | RAI14_HUMAN |
|--------|---|--------|---------------|---|-------------|

| <i>Accession No*</i>                                                                     | <i>Charge</i> | <i>XC(Max)**</i> | <i>Peptide*</i>           | <i>TC***</i> | <i>Reference No*</i> |
|------------------------------------------------------------------------------------------|---------------|------------------|---------------------------|--------------|----------------------|
| Q9P0K7                                                                                   | 2             | 3.5027           | K.LMQLTNVSR.A             | 1            | RAI14_HUMAN          |
| Q9P0K7                                                                                   | 2             | 3.6749           | R.QSQQLEALQQQVK.Q         | 1            | RAI14_HUMAN          |
| Q9P0K7                                                                                   | 2             | 5.7892           | R.IQQLQEILQDLQK.R         | 6            | RAI14_HUMAN          |
| Q9P0K7                                                                                   | 3             | 4.1193           | K.RLESSEAERK.Q            | 2            | RAI14_HUMAN          |
| <b><i>Ankyrin 2 - Homo sapiens (Human)</i></b>                                           |               |                  |                           |              |                      |
| A5XEK0                                                                                   | 2             | 4.2079           | K.HLGDSSLATDLPSAK.D       | 2            | A5XEK0_HUMAN         |
| <b><i>Ankyrin repeat and SAM domain-containing protein 4B - Homo sapiens (Human)</i></b> |               |                  |                           |              |                      |
| Q8N8V4                                                                                   | 2             | 3.1107           | K.LPSELLQR.Q              | 1            | ANS4B_HUMAN          |
| Q8N8V4                                                                                   | 2             | 3.896            | R.SSPSNASAPGTFGSLSK.G     | 1            | ANS4B_HUMAN          |
| Q8N8V4                                                                                   | 2             | 2.8804           | K.DTAEQVGKEGR.S           | 1            | ANS4B_HUMAN          |
| <b><i>Ankyrin repeat and SAM domain-containing protein 6 - Homo sapiens (Human)</i></b>  |               |                  |                           |              |                      |
| Q68DC2                                                                                   | 2             | 3.4927           | R.QQILAAISELNAGK.G        | 2            | ANKS6_HUMAN          |
| Q68DC2                                                                                   | 3             | 3.9351           | K.GHTAESSVSSSSSHR.Q       | 1            | ANKS6_HUMAN          |
| <b><i>Ankyrin repeat domain-containing protein 25 - Homo sapiens (Human)</i></b>         |               |                  |                           |              |                      |
| Q63ZY3                                                                                   | 2             | 3.5962           | K.ALQELQAAQAR.Q           | 2            | ANR25_HUMAN          |
| Q63ZY3                                                                                   | 2             | 5.3745           | R.QAASQESEEAGGTGGPPAGVR.S | 2            | ANR25_HUMAN          |
| <b><i>Ankyrin repeat domain-containing protein 38 - Homo sapiens (Human)</i></b>         |               |                  |                           |              |                      |
| Q5T7N3                                                                                   | 2             | 4.6052           | R.IEEAGTEQEGGPQGGTR.G     | 1            | ANR38_HUMAN          |
| Q5T7N3                                                                                   | 2             | 3.8329           | R.IPELVQEGAEPPEGVVK.V     | 1            | ANR38_HUMAN          |
| <b><i>Ankyrin repeat domain-containing protein 47 - Homo sapiens (Human)</i></b>         |               |                  |                           |              |                      |
| Q6NY19                                                                                   | 2             | 3.2135           | R.RAPGPPTS.R              | 3            | ANR47_HUMAN          |
| Q6NY19                                                                                   | 2             | 2.7067           | R.LRELEDQAR.T             | 1            | ANR47_HUMAN          |
| Q6NY19                                                                                   | 2             | 3.1663           | R.EAGAQAVPETR.E           | 1            | ANR47_HUMAN          |
| Q6NY19                                                                                   | 2             | 4.1932           | R.EVAAEAVPETR.E           | 3            | ANR47_HUMAN          |
| Q6NY19                                                                                   | 2             | 3.2714           | R.EAAEEAAAGAR.A           | 2            | ANR47_HUMAN          |
| <b><i>Ankyrin repeat domain-containing protein 57 - Homo sapiens (Human)</i></b>         |               |                  |                           |              |                      |
| Q53LP3                                                                                   | 2             | 4.1864           | R.DRLPDAAAPESLPGQGR.E     | 2            | ANR57_HUMAN          |
| Q53LP3                                                                                   | 2             | 5.1973           | R.IQVTAEPPEAPDGPAGPEAR.D  | 3            | ANR57_HUMAN          |
| Q53LP3                                                                                   | 2             | 3.117            | R.GEEGVGEERPVK.G          | 1            | ANR57_HUMAN          |
| Q53LP3                                                                                   | 2             | 2.7569           | R.GALGGEPEQR.A            | 1            | ANR57_HUMAN          |
| <b><i>Ankyrin-1 - Homo sapiens (Human)</i></b>                                           |               |                  |                           |              |                      |
| P16157                                                                                   | 3             | 4.021            | R.ITHSPTVSQVTER.S         | 1            | ANK1_HUMAN           |
| P16157                                                                                   | 2             | 3.4687           | R.QQGQEEQVQEAQ.N          | 4            | ANK1_HUMAN           |

*Accession No\* Charge XC(Max)\*\* Peptide\* TC\*\*\* Reference No\**

***Ankyrin-2 - Homo sapiens (Human)***

|        |   |        |                                |   |            |
|--------|---|--------|--------------------------------|---|------------|
| Q01484 | 2 | 3.5842 | K.SESDASSLDSK.T                | 3 | ANK2_HUMAN |
| Q01484 | 2 | 4.3359 | K.DLPTVQTGDIPPLSGVK.Q          | 3 | ANK2_HUMAN |
| Q01484 | 2 | 3.0383 | K.ATSPLIEETPIGSIK.D            | 2 | ANK2_HUMAN |
| Q01484 | 2 | 2.9188 | K.AFQSGQDPSK.H                 | 1 | ANK2_HUMAN |
| Q01484 | 2 | 3.2548 | K.TELLTEVASVR.S                | 1 | ANK2_HUMAN |
| Q01484 | 2 | 3.9419 | R.HAVSTEAE DR.S                | 5 | ANK2_HUMAN |
| Q01484 | 2 | 2.9097 | R.GDDSPDSSPEEQK.S              | 1 | ANK2_HUMAN |
| Q01484 | 3 | 6.5846 | R.ERAELELESEEGATRPK.I          | 2 | ANK2_HUMAN |
| Q01484 | 2 | 4.1198 | R.GATVTEDES TSTESFQK.E         | 2 | ANK2_HUMAN |
| Q01484 | 2 | 4.8204 | R.SKESDASSLDSK.T               | 2 | ANK2_HUMAN |
| Q01484 | 2 | 3.0798 | K.RLPVSPSGR.T                  | 1 | ANK2_HUMAN |
| Q01484 | 3 | 4.6305 | R.VEQQLSDLDTSVQK.T             | 5 | ANK2_HUMAN |
| Q01484 | 2 | 2.7215 | R.SVYSDRGDDSPDSSPEEQK.S        | 1 | ANK2_HUMAN |
| Q01484 | 3 | 5.7714 | R.LLRDPDGS AEDDSLEQTSLMESSGK.S | 1 | ANK2_HUMAN |
| Q01484 | 2 | 3.5452 | K.SPLSPDTPSSEEVSYE VTPK.T      | 3 | ANK2_HUMAN |
| Q01484 | 2 | 4.1181 | R.DSLESSPVEPK.M                | 4 | ANK2_HUMAN |
| Q01484 | 2 | 3.3122 | R.SPQGLELALPSR.D               | 2 | ANK2_HUMAN |
| Q01484 | 2 | 4.3866 | K.TVAPQGQDMASIAPDNR.S          | 2 | ANK2_HUMAN |
| Q01484 | 2 | 3.5577 | K.TDTGTESKPQGVIR.S             | 2 | ANK2_HUMAN |
| Q01484 | 3 | 4.2355 | K.TDVSDSWSEIREDDEAFEAR.V       | 1 | ANK2_HUMAN |
| Q01484 | 2 | 2.9419 | K.GADSGLLPEPVIR.V              | 2 | ANK2_HUMAN |
| Q01484 | 2 | 3.665  | K.TVAPQGQDM#ASIAPDNR.S         | 2 | ANK2_HUMAN |
| Q01484 | 2 | 3.7513 | R.TPTEEGTPTSEQNPF LFQEGK.L     | 1 | ANK2_HUMAN |
| Q01484 | 2 | 2.7575 | R.EAQKTENQTIK.R                | 1 | ANK2_HUMAN |
| Q01484 | 2 | 2.946  | K.TDEFENLPK.D                  | 1 | ANK2_HUMAN |
| Q01484 | 2 | 2.8765 | R.DESSVQSSR.S                  | 2 | ANK2_HUMAN |

***Annexin A2 - Homo sapiens (Human)***

|        |   |        |                       |   |             |
|--------|---|--------|-----------------------|---|-------------|
| P07355 | 3 | 6.0969 | K.TDLEKDIISDTSGDFRK.L | 1 | ANXA2_HUMAN |
|--------|---|--------|-----------------------|---|-------------|

***Annexin A5 - Homo sapiens (Human)***

|        |   |        |                     |   |             |
|--------|---|--------|---------------------|---|-------------|
| P08758 | 2 | 2.9995 | R.ADAETLRK.A        | 1 | ANXA5_HUMAN |
| P08758 | 3 | 3.8285 | K.WGTDEEKFITIFGTR.S | 1 | ANXA5_HUMAN |
| P08758 | 2 | 2.9935 | K.LIVALMKPSR.L      | 1 | ANXA5_HUMAN |
| P08758 | 2 | 4.337  | R.DLLDDLKSELTKG.F   | 3 | ANXA5_HUMAN |
| P08758 | 2 | 2.8841 | R.LYDAYELK.H        | 1 | ANXA5_HUMAN |

| <i>Accession No*</i>                                                     | <i>Charge</i> | <i>XC(Max)**</i> | <i>Peptide*</i>                   | <i>TC***</i> | <i>Reference No*</i> |
|--------------------------------------------------------------------------|---------------|------------------|-----------------------------------|--------------|----------------------|
| P08758                                                                   | 2             | 2.9224           | R.SEIDLFNIRK.E                    | 1            | ANXA5_HUMAN          |
| P08758                                                                   | 2             | 3.2372           | K.GAGTDDHTLIR.V                   | 2            | ANXA5_HUMAN          |
| P08758                                                                   | 2             | 3.0609           | R.GTVTDFPGFDER.A                  | 1            | ANXA5_HUMAN          |
| P08758                                                                   | 2             | 3.5619           | K.NFATSLYSMIK.G                   | 2            | ANXA5_HUMAN          |
| <b><i>Antigen MU-RMS-40.18 - Homo sapiens (Human)</i></b>                |               |                  |                                   |              |                      |
| Q5GHI6                                                                   | 2             | 4.9278           | K.IGHLQEELEEK.K                   | 5            | Q5GHI6_HUMAN         |
| <b><i>API subunit gamma-binding protein 1 - Homo sapiens (Human)</i></b> |               |                  |                                   |              |                      |
| Q9UMZ2                                                                   | 2             | 4.1191           | K.ILETTM#TPTGIDTAK.L              | 3            | SYNG_HUMAN           |
| Q9UMZ2                                                                   | 2             | 3.734            | K.LSPFVLSAGSGSPSATSILQK.K         | 1            | SYNG_HUMAN           |
| Q9UMZ2                                                                   | 2             | 4.3353           | K.LYPILMSSGLPR.E                  | 2            | SYNG_HUMAN           |
| Q9UMZ2                                                                   | 2             | 4.8351           | K.ILETTMTPTGIDTAK.L               | 6            | SYNG_HUMAN           |
| Q9UMZ2                                                                   | 3             | 4.1211           | R.DYKDFTKQDLPTAER.S               | 2            | SYNG_HUMAN           |
| Q9UMZ2                                                                   | 1             | 2.3662           | K.FSSINSDK.S                      | 1            | SYNG_HUMAN           |
| Q9UMZ2                                                                   | 2             | 3.6764           | K.SDDDFADFHSSK.F                  | 1            | SYNG_HUMAN           |
| Q9UMZ2                                                                   | 2             | 5.5061           | R.ELEQTAENKPLGESFAEFR.S           | 4            | SYNG_HUMAN           |
| Q9UMZ2                                                                   | 3             | 4.5833           | R.KLSPFVLSAGSGSPSATSILQK.K        | 2            | SYNG_HUMAN           |
| Q9UMZ2                                                                   | 2             | 3.5505           | K.TADSVSPLEPPTKDK.T               | 1            | SYNG_HUMAN           |
| Q9UMZ2                                                                   | 3             | 4.4959           | R.QLSLEGSGLGVEDLKDNTPSGK.S        | 1            | SYNG_HUMAN           |
| Q9UMZ2                                                                   | 2             | 4.6827           | R.ETLGQIWALANR.T                  | 5            | SYNG_HUMAN           |
| <b><i>AP-2 complex subunit alpha-2 - Homo sapiens (Human)</i></b>        |               |                  |                                   |              |                      |
| O94973                                                                   | 3             | 3.735            | K.KGPSTVTDLEDTKR.D                | 1            | AP2A2_HUMAN          |
| <b><i>AP2-associated protein kinase 1 - Homo sapiens (Human)</i></b>     |               |                  |                                   |              |                      |
| Q2M2I8                                                                   | 3             | 4.3263           | K.QPQAPPTPQQTPSTQAQGLPAQAQATPQHQQ | 1            | AAK1_HUMAN           |
| Q2M2I8                                                                   | 2             | 2.8496           | K.SATTTSPSGSPR.T                  | 2            | AAK1_HUMAN           |
| Q2M2I8                                                                   | 2             | 2.85             | K.VQTTPPPAVQGQK.V                 | 1            | AAK1_HUMAN           |
| Q2M2I8                                                                   | 2             | 2.8482           | K.STQLLQAAAAEASLNK.S              | 1            | AAK1_HUMAN           |
| Q2M2I8                                                                   | 2             | 4.6517           | R.ILSDVTHSAVFGVPASK.S             | 4            | AAK1_HUMAN           |
| Q2M2I8                                                                   | 2             | 4.2068           | K.LTAEELLNKDFAK.L                 | 4            | AAK1_HUMAN           |
| <b><i>AP-3 complex subunit delta-1 - Homo sapiens (Human)</i></b>        |               |                  |                                   |              |                      |
| O14617                                                                   | 3             | 4.6165           | R.ALDIDLKPLADSEKLPQIK.H           | 2            | AP3D1_HUMAN          |
| O14617                                                                   | 2             | 2.8227           | K.VPGLPMSDQYVK.L                  | 1            | AP3D1_HUMAN          |
| O14617                                                                   | 3             | 5.1244           | K.HRPSEADEEELAR.R                 | 1            | AP3D1_HUMAN          |
| O14617                                                                   | 3             | 4.9567           | R.NTETSKSPEKDVPMVEK.K             | 1            | AP3D1_HUMAN          |
| <b><i>Apolipoprotein A-I precursor - Homo sapiens (Human)</i></b>        |               |                  |                                   |              |                      |



| <i>Accession No*</i> | <i>Charge</i> | <i>XC(Max)**</i> | <i>Peptide*</i>                  | <i>TC***</i> | <i>Reference No*</i> |
|----------------------|---------------|------------------|----------------------------------|--------------|----------------------|
| P02647               | 2             | 3.5854           | R.THLAPYSDELRR.L                 | 3            | APOA1_HUMAN          |
| P02647               | 3             | 5.0849           | R.AHVDALRTHLAPYSDELRR.L          | 2            | APOA1_HUMAN          |
| P02647               | 3             | 4.1783           | R.VKDLATVYVDVLDKSGR.D            | 1            | APOA1_HUMAN          |
| P02647               | 2             | 4.9313           | R.VKDLATVYVDVLDK.D               | 10           | APOA1_HUMAN          |
| P02647               | 2             | 3.6222           | K.LLDNWDSVTSTFSK.L               | 7            | APOA1_HUMAN          |
| P02647               | 2             | 4.6002           | R.LAARLEALKENGGAR.L              | 4            | APOA1_HUMAN          |
| P02647               | 2             | 2.8393           | R.EQLGPVTQEFWDNLEK.E             | 2            | APOA1_HUMAN          |
| P02647               | 2             | 3.0432           | K.WQEEM#ELYR.Q                   | 1            | APOA1_HUMAN          |
| P02647               | 2             | 4.7703           | R.DYVSQFEGSALGK.Q                | 4            | APOA1_HUMAN          |
| P02647               | 2             | 5.327            | K.DSGRDYVSQFEGSALGK.Q            | 11           | APOA1_HUMAN          |
| P02647               | 3             | 5.4156           | K.LREQLGPTQEFWDNLEK.E            | 2            | APOA1_HUMAN          |
| P02647               | 4             | 6.2444           | K.LREQLGPTQEFWDNLEKETEGLR.Q      | 2            | APOA1_HUMAN          |
| P02647               | 2             | 3.374            | K.VEPLRAELQEGAR.Q                | 2            | APOA1_HUMAN          |
| P02647               | 2             | 2.9118           | K.VQPYLDDFQKK.W                  | 2            | APOA1_HUMAN          |
| P02647               | 2             | 3.7511           | K.DLATVYVDVLDK.D                 | 3            | APOA1_HUMAN          |
| P02647               | 1             | 2.4599           | K.LHELQEK.L                      | 1            | APOA1_HUMAN          |
| P02647               | 2             | 4.9889           | K.VSFLSALEEYTK.K                 | 15           | APOA1_HUMAN          |
| P02647               | 2             | 3.1321           | K.KWQEEMELYR.Q                   | 2            | APOA1_HUMAN          |
| P02647               | 2             | 3.3798           | K.WQEEMELYR.Q                    | 4            | APOA1_HUMAN          |
| P02647               | 2             | 3.1603           | R.QGLLPVLESFK.V                  | 2            | APOA1_HUMAN          |
| P02647               | 3             | 4.6154           | K.DLATVYVDVLDKSGRDYVSQFEGSALGK.Q | 3            | APOA1_HUMAN          |
| P02647               | 2             | 3.2536           | K.KWQEEM#ELYR.Q                  | 2            | APOA1_HUMAN          |

***Apolipoprotein A-II precursor - Homo sapiens (Human)***

|        |   |        |                            |   |             |
|--------|---|--------|----------------------------|---|-------------|
| P02652 | 3 | 4.0267 | K.VKSPQLQAEAK.S            | 3 | APOA2_HUMAN |
| P02652 | 3 | 4.7949 | K.AGTELVNFLSYFVELGTQPATQ.- | 5 | APOA2_HUMAN |
| P02652 | 2 | 3.151  | K.SPELQAEAK.S              | 4 | APOA2_HUMAN |
| P02652 | 2 | 3.6125 | K.SKEQLTPLIKK.A            | 2 | APOA2_HUMAN |

***Apolipoprotein A-IV precursor - Homo sapiens (Human)***

|        |   |        |                       |   |             |
|--------|---|--------|-----------------------|---|-------------|
| P06727 | 2 | 3.9772 | K.ALVQQMEQLR.Q        | 4 | APOA4_HUMAN |
| P06727 | 2 | 2.995  | K.VNSFFSTFK.E         | 2 | APOA4_HUMAN |
| P06727 | 3 | 5.2337 | K.SLAELGGHLDQQVEEFR.R | 3 | APOA4_HUMAN |
| P06727 | 3 | 4.2243 | K.AKIDQNVEELKGR.L     | 2 | APOA4_HUMAN |
| P06727 | 2 | 4.5555 | K.LGEVNTYAGDLQK.K     | 4 | APOA4_HUMAN |
| P06727 | 2 | 3.2621 | K.ALVQQM#EQLR.Q       | 1 | APOA4_HUMAN |
| P06727 | 2 | 3.7292 | R.DKVNSFFSTFK.E       | 4 | APOA4_HUMAN |
| P06727 | 2 | 3.6192 | R.RVEPYGENFNK.A       | 3 | APOA4_HUMAN |

| <i>Accession No*</i>                                                 | <i>Charge</i> | <i>XC(Max)**</i> | <i>Peptide*</i>                 | <i>TC***</i> | <i>Reference No*</i> |
|----------------------------------------------------------------------|---------------|------------------|---------------------------------|--------------|----------------------|
| P06727                                                               | 2             | 2.7224           | K.LVPFATELHER.L                 | 1            | APOA4_HUMAN          |
| P06727                                                               | 3             | 5.4078           | K.LGPHAGDVEGHLSFLEK.D           | 8            | APOA4_HUMAN          |
| P06727                                                               | 3             | 4.5969           | K.LKEEIGKELEELR.A               | 4            | APOA4_HUMAN          |
| P06727                                                               | 3             | 4.3724           | K.LNHQLEGLTFQMK.K               | 4            | APOA4_HUMAN          |
| P06727                                                               | 2             | 3.8305           | R.ISASAEELR.Q                   | 4            | APOA4_HUMAN          |
| P06727                                                               | 3             | 4.4833           | K.KLVPFATELHER.L                | 3            | APOA4_HUMAN          |
| P06727                                                               | 3             | 4.9924           | K.SELTQQLNALFQDKLGEVNTYAGDLQK.K | 1            | APOA4_HUMAN          |
| <b><i>Apolipoprotein B48 receptor - Homo sapiens (Human)</i></b>     |               |                  |                                 |              |                      |
| Q0VD83                                                               | 2             | 3.6145           | R.TEEAAESQTAGR.E                | 2            | Q0VD83_HUMAN         |
| <b><i>Apolipoprotein C-III precursor - Homo sapiens (Human)</i></b>  |               |                  |                                 |              |                      |
| P02656                                                               | 2             | 5.4953           | K.DALSSVQESQVAQQAR.G            | 14           | APOC3_HUMAN          |
| <b><i>Apolipoprotein D precursor - Homo sapiens (Human)</i></b>      |               |                  |                                 |              |                      |
| P05090                                                               | 2             | 2.7249           | K.NILTSNNIDVK.K                 | 2            | APOD_HUMAN           |
| <b><i>Apolipoprotein E precursor - Homo sapiens (Human)</i></b>      |               |                  |                                 |              |                      |
| P02649                                                               | 2             | 4.4404           | K.AYKSELEEQLTPVAEETR.A          | 1            | APOE_HUMAN           |
| P02649                                                               | 2             | 3.4493           | R.GEVQAMLGQSTEELR.V             | 1            | APOE_HUMAN           |
| P02649                                                               | 2             | 4.4444           | R.AATVGSLLAGQPLQER.A            | 4            | APOE_HUMAN           |
| P02649                                                               | 2             | 5.8408           | K.VQAAVGTSAAPVPSDNH.-           | 3            | APOE_HUMAN           |
| P02649                                                               | 2             | 4.1829           | K.SELEEQLTPVAEETR.A             | 2            | APOE_HUMAN           |
| P02649                                                               | 2             | 2.8492           | R.LAVYQAGAR.E                   | 1            | APOE_HUMAN           |
| <b><i>Apolipoprotein O precursor - Homo sapiens (Human)</i></b>      |               |                  |                                 |              |                      |
| Q9BUR5                                                               | 2             | 3.5765           | K.VDELSLYSVPEGQSK.Y             | 2            | APOO_HUMAN           |
| Q9BUR5                                                               | 2             | 3.5535           | R.SQLEESISQLR.H                 | 4            | APOO_HUMAN           |
| <b><i>Apolipoprotein O-like precursor - Homo sapiens (Human)</i></b> |               |                  |                                 |              |                      |
| Q6UXV4                                                               | 3             | 5.316            | K.LMDHGQSHPEDIDMYSTRS.-         | 1            | APOOL_HUMAN          |
| Q6UXV4                                                               | 3             | 5.7597           | K.LMDHGQSHPEDIDMYSTR.S          | 9            | APOOL_HUMAN          |
| Q6UXV4                                                               | 3             | 4.0575           | K.LM#DHGQSHPEDIDMYSTR.S         | 1            | APOOL_HUMAN          |
| Q6UXV4                                                               | 2             | 3.6628           | K.HSVPLPTELSSEAK.T              | 4            | APOOL_HUMAN          |
| <b><i>Apolipoprotein-L2 - Homo sapiens (Human)</i></b>               |               |                  |                                 |              |                      |
| Q9BQE5                                                               | 2             | 2.7097           | K.HLLEGAKSESAEELKK.R            | 1            | APOL2_HUMAN          |
| <b><i>Apoptosis inhibitor 5 - Homo sapiens (Human)</i></b>           |               |                  |                                 |              |                      |
| Q9BZZ5                                                               | 3             | 4.866            | K.RASEDTTSGSPPKK.S              | 3            | API5_HUMAN           |
| Q9BZZ5                                                               | 2             | 3.1841           | R.ASEDTTSGSPPKK.S               | 3            | API5_HUMAN           |

| <i>Accession No*</i>                                                                           | <i>Charge</i> | <i>XC(Max)**</i> | <i>Peptide*</i>                    | <i>TC***</i> | <i>Reference No*</i> |
|------------------------------------------------------------------------------------------------|---------------|------------------|------------------------------------|--------------|----------------------|
| Q9BZZ5                                                                                         | 2             | 3.918            | R.ASEDTTSGSPPK.K                   | 3            | API5_HUMAN           |
| <b><i>Apoptosis-associated speck-like protein containing a CARD - Homo sapiens (Human)</i></b> |               |                  |                                    |              |                      |
| Q9ULZ3                                                                                         | 2             | 5.1918           | R.DAILDALENLTAEELKK.F              | 3            | ASC_HUMAN            |
| <b><i>Apoptosis-inducing factor 1, mitochondrial precursor - Homo sapiens (Human)</i></b>      |               |                  |                                    |              |                      |
| O95831                                                                                         | 2             | 4.1808           | R.ISGLGLTPEQK.Q                    | 3            | AIFM1_HUMAN          |
| <b><i>Apoptosis-stimulating of p53 protein 2 - Homo sapiens (Human)</i></b>                    |               |                  |                                    |              |                      |
| Q13625                                                                                         | 2             | 3.9376           | K.NFQQAVQSALTK.T                   | 2            | ASPP2_HUMAN          |
| Q13625                                                                                         | 2             | 2.7133           | R.NQSDADLEALR.K                    | 1            | ASPP2_HUMAN          |
| Q13625                                                                                         | 3             | 3.9308           | K.VRPFMSFDAVDQSNAPPSFGTLR.K        | 1            | ASPP2_HUMAN          |
| <b><i>Apoptotic chromatin condensation inducer in the nucleus - Homo sapiens (Human)</i></b>   |               |                  |                                    |              |                      |
| Q9UKV3                                                                                         | 2             | 4.0589           | K.STLADYSAQKDLEPESDR.S             | 2            | ACINU_HUMAN          |
| Q9UKV3                                                                                         | 2             | 3.5327           | R.TSTSSSSVQAR.R                    | 7            | ACINU_HUMAN          |
| Q9UKV3                                                                                         | 2             | 3.9357           | R.SQEQEVLER.G                      | 3            | ACINU_HUMAN          |
| Q9UKV3                                                                                         | 2             | 2.8656           | R.LSQPESA EK.H                     | 1            | ACINU_HUMAN          |
| Q9UKV3                                                                                         | 2             | 3.4457           | R.RLSQPESA EK.H                    | 4            | ACINU_HUMAN          |
| Q9UKV3                                                                                         | 3             | 6.5816           | R.NLKTEEEEEEEEEEEEEDEEEEEGDDEGQK.S | 2            | ACINU_HUMAN          |
| Q9UKV3                                                                                         | 3             | 4.5635           | K.AESPAEKVPEESVLPVQK.S             | 2            | ACINU_HUMAN          |
| Q9UKV3                                                                                         | 2             | 3.131            | R.DSSTSYTETK.D                     | 1            | ACINU_HUMAN          |
| Q9UKV3                                                                                         | 2             | 3.3751           | R.WGASTATTQK.K                     | 2            | ACINU_HUMAN          |
| Q9UKV3                                                                                         | 2             | 3.2305           | R.VKPEEMMDERPK.T                   | 2            | ACINU_HUMAN          |
| Q9UKV3                                                                                         | 2             | 3.1101           | K.GVPAGNSDTEGGQPGRK.R              | 1            | ACINU_HUMAN          |
| Q9UKV3                                                                                         | 2             | 3.4899           | K.STLADYSAQK.D                     | 3            | ACINU_HUMAN          |
| Q9UKV3                                                                                         | 3             | 5.0866           | K.HSTPHAAFQPN SQIGEEMSQNSFIK.Q     | 2            | ACINU_HUMAN          |
| Q9UKV3                                                                                         | 2             | 3.8013           | K.LSEGSQPAEEEEEDQETPSR.N           | 5            | ACINU_HUMAN          |
| Q9UKV3                                                                                         | 2             | 2.964            | K.GALMLENLQK.H                     | 2            | ACINU_HUMAN          |
| Q9UKV3                                                                                         | 2             | 4.1003           | K.GVPAGNSDTEGGQPGR.K               | 3            | ACINU_HUMAN          |
| Q9UKV3                                                                                         | 2             | 3.9357           | K.VPEESVLPVQK.S                    | 2            | ACINU_HUMAN          |
| Q9UKV3                                                                                         | 2             | 3.4327           | K.TTSPLEEEEREIK.S                  | 2            | ACINU_HUMAN          |
| <b><i>Arfaptin-1 - Homo sapiens (Human)</i></b>                                                |               |                  |                                    |              |                      |
| P53367                                                                                         | 2             | 3.3865           | K.SGPVILADEIKNPAM#EK.L             | 1            | ARFP1_HUMAN          |
| P53367                                                                                         | 2             | 4.233            | R.LAQQGSDLIVPAGGQR.T               | 3            | ARFP1_HUMAN          |
| P53367                                                                                         | 2             | 4.8071           | K.SGPVILADEIKNPAMEK.L              | 1            | ARFP1_HUMAN          |
| P53367                                                                                         | 3             | 6.0657           | K.HSLPSGLGLSETQITSHGFDNTK.E        | 4            | ARFP1_HUMAN          |
| <b><i>Arfaptin-2 - Homo sapiens (Human)</i></b>                                                |               |                  |                                    |              |                      |

| <i>Accession No*</i>                                                                                 | <i>Charge</i> | <i>XC(Max)**</i> | <i>Peptide*</i>              | <i>TC***</i> | <i>Reference No*</i> |
|------------------------------------------------------------------------------------------------------|---------------|------------------|------------------------------|--------------|----------------------|
| P53365                                                                                               | 3             | 4.198            | R.HPSHSTTPSGPGDEVAR.G        | 1            | ARFP2_HUMAN          |
| <b><i>Argininosuccinate synthase - Homo sapiens (Human)</i></b>                                      |               |                  |                              |              |                      |
| P00966                                                                                               | 2             | 4.054            | K.APNTPDILEIEFK.K            | 2            | ASSY_HUMAN           |
| <b><i>ARHGAP5 protein - Homo sapiens (Human)</i></b>                                                 |               |                  |                              |              |                      |
| Q05BE8                                                                                               | 3             | 7.1135           | R.VPLAHPEDMDPSDNYAEPIDTIFK.Q | 5            | Q05BE8_HUMAN         |
| <b><i>Armadillo repeat protein deleted in velo-cardio-facial syndrome - Homo sapiens (Human)</i></b> |               |                  |                              |              |                      |
| O00192                                                                                               | 2             | 3.9941           | R.SLAADDEGGPELEPDYGTATR.R    | 2            | ARVC_HUMAN           |
| O00192                                                                                               | 2             | 5.1137           | R.LVDAVGDAKQPQVDSWV.-        | 2            | ARVC_HUMAN           |
| O00192                                                                                               | 2             | 3.7742           | R.FQAEPYGLEDDTR.S            | 2            | ARVC_HUMAN           |
| O00192                                                                                               | 2             | 2.8163           | R.DSPSYGSLSR.G               | 1            | ARVC_HUMAN           |
| <b><i>Asparaginase-like protein 1 - Homo sapiens (Human)</i></b>                                     |               |                  |                              |              |                      |
| Q7L266                                                                                               | 2             | 2.7042           | R.VHQGMVR.A                  | 1            | Q7L266_HUMAN         |
| Q7L266                                                                                               | 2             | 3.6971           | R.AATVGYGILR.E               | 8            | Q7L266_HUMAN         |
| <b><i>Aspartate aminotransferase, cytoplasmic - Homo sapiens (Human)</i></b>                         |               |                  |                              |              |                      |
| P17174                                                                                               | 2             | 2.734            | R.IGADFLAR.W                 | 1            | AATC_HUMAN           |
| <b><i>Aspartate aminotransferase, mitochondrial precursor - Homo sapiens (Human)</i></b>             |               |                  |                              |              |                      |
| P00505                                                                                               | 2             | 3.4466           | R.KAEAQIAAK.N                | 4            | AATM_HUMAN           |
| <b><i>Ataxin-2-like protein - Homo sapiens (Human)</i></b>                                           |               |                  |                              |              |                      |
| Q8WWM7                                                                                               | 3             | 3.9453           | K.GEDKDEGPVAEQVKK.S          | 1            | ATX2L_HUMAN          |
| Q8WWM7                                                                                               | 2             | 4.5062           | K.EVDGLLTSEPM#GSPVSSK.T      | 2            | ATX2L_HUMAN          |
| Q8WWM7                                                                                               | 3             | 3.8495           | K.EKEVDGLLTSEPM#GSPVSSK.T    | 2            | ATX2L_HUMAN          |
| Q8WWM7                                                                                               | 2             | 4.5839           | K.GEDKDEGPVAEQVK.K           | 2            | ATX2L_HUMAN          |
| Q8WWM7                                                                                               | 2             | 3.8574           | R.AEGLQVGQDAR.V              | 2            | ATX2L_HUMAN          |
| Q8WWM7                                                                                               | 2             | 2.7629           | K.VPGLQNEQK.R                | 1            | ATX2L_HUMAN          |
| Q8WWM7                                                                                               | 2             | 3.4698           | K.EVDGLLTSEPMGSPVSSK.T       | 3            | ATX2L_HUMAN          |
| <b><i>Atherin - Homo sapiens (Human)</i></b>                                                         |               |                  |                              |              |                      |
| Q6SPF0                                                                                               | 2             | 2.7599           | R.RAPPPAVALR.E               | 1            | SAMD1_HUMAN          |
| <b><i>AT-hook-containing transcription factor 1 - Homo sapiens (Human)</i></b>                       |               |                  |                              |              |                      |
| Q8WYP5                                                                                               | 3             | 3.9825           | K.SKVPVLDEGLTSVETYTPAIR.A    | 1            | AHTF1_HUMAN          |
| Q8WYP5                                                                                               | 2             | 3.5698           | R.SVENQESVEIINDLK.V          | 1            | AHTF1_HUMAN          |
| Q8WYP5                                                                                               | 2             | 3.7761           | K.VAIAENLLDVIK.D             | 4            | AHTF1_HUMAN          |
| Q8WYP5                                                                                               | 2             | 4.5987           | R.NLSFNELYPSGTLK.L           | 5            | AHTF1_HUMAN          |

*Accession No\* Charge XC(Max)\*\* Peptide\* TC\*\*\* Reference No\**

***ATP synthase D chain, mitochondrial - Homo sapiens (Human)***

|        |   |        |                           |   |             |
|--------|---|--------|---------------------------|---|-------------|
| O75947 | 2 | 4.3562 | K.YPYWPHQPIENL.-          | 5 | ATP5H_HUMAN |
| O75947 | 2 | 3.2827 | R.IVEYEKEMEK.M            | 2 | ATP5H_HUMAN |
| O75947 | 2 | 3.9921 | K.KYPYWPHQPIENL.-         | 6 | ATP5H_HUMAN |
| O75947 | 3 | 5.3493 | K.VPVPEDKYTAQVDAEEKEDVK.S | 5 | ATP5H_HUMAN |
| O75947 | 2 | 3.4111 | R.IVEYEKEM#EK.M           | 4 | ATP5H_HUMAN |

***ATP synthase delta chain, mitochondrial precursor - Homo sapiens (Human)***

|        |   |        |                                     |    |            |
|--------|---|--------|-------------------------------------|----|------------|
| P30049 | 2 | 5.4892 | K.AQAEVLGTADEATR.A                  | 33 | ATPD_HUMAN |
| P30049 | 3 | 4.0519 | K.AQAEVLGTADEATRAEIQIR.I            | 4  | ATPD_HUMAN |
| P30049 | 1 | 3.135  | R.IEANEALVK.A                       | 6  | ATPD_HUMAN |
| P30049 | 3 | 5.333  | R.PGLVVVHAEDGTTSK.Y                 | 4  | ATPD_HUMAN |
| P30049 | 3 | 3.7781 | R.QVDVPTLTGAFGILAAHVPTLQVLRPGLVVVHA | 1  | ATPD_HUMAN |

***ATP synthase subunit alpha, mitochondrial precursor - Homo sapiens (Human)***

|        |   |        |                           |   |            |
|--------|---|--------|---------------------------|---|------------|
| P25705 | 2 | 5.6948 | R.ILGADTSVDLEETGR.V       | 8 | ATPA_HUMAN |
| P25705 | 2 | 3.247  | K.TGTAEM#SSILEER.I        | 2 | ATPA_HUMAN |
| P25705 | 2 | 4.0878 | K.TGTAEMSSILEER.I         | 2 | ATPA_HUMAN |
| P25705 | 2 | 3.0933 | R.VLSIGDGIAR.V            | 3 | ATPA_HUMAN |
| P25705 | 2 | 4.5267 | K.LKEIVTNFLAGFEA.-        | 2 | ATPA_HUMAN |
| P25705 | 3 | 5.8614 | K.FENAFLSHVVSQHQALLGTIR.A | 3 | ATPA_HUMAN |
| P25705 | 2 | 4.1487 | R.VVDALGNAIDGK.G          | 2 | ATPA_HUMAN |

***ATP synthase subunit beta, mitochondrial precursor - Homo sapiens (Human)***

|        |   |        |                           |   |            |
|--------|---|--------|---------------------------|---|------------|
| P06576 | 2 | 3.2892 | K.VALVYQGMNEPPGAR.A       | 1 | ATPB_HUMAN |
| P06576 | 3 | 4.1585 | K.VLDSGAPIKIPVGPETLGR.I   | 5 | ATPB_HUMAN |
| P06576 | 2 | 3.3126 | R.TIAMDGTEGLVR.G          | 1 | ATPB_HUMAN |
| P06576 | 2 | 4.1418 | R.FTQAGSEVSALLGR.I        | 2 | ATPB_HUMAN |
| P06576 | 3 | 3.8442 | R.IM#NVIGEPIDERGPIK.T     | 1 | ATPB_HUMAN |
| P06576 | 2 | 3.9228 | R.IPSAVGYQPTLATDMGMTQER.I | 1 | ATPB_HUMAN |
| P06576 | 2 | 3.6333 | R.IMNVIGEPIDER.G          | 3 | ATPB_HUMAN |
| P06576 | 2 | 4.6693 | K.TVLIM#ELINNVAK.A        | 2 | ATPB_HUMAN |
| P06576 | 2 | 5.0529 | R.LVLEVAQHLGESTVR.T       | 4 | ATPB_HUMAN |
| P06576 | 2 | 2.7769 | K.ADKLAEHSS.-             | 3 | ATPB_HUMAN |

***ATP synthase-coupling factor 6, mitochondrial precursor - Homo sapiens (Human)***

|        |   |        |                              |   |             |
|--------|---|--------|------------------------------|---|-------------|
| P18859 | 1 | 2.2044 | K.LFVDKIR.E                  | 3 | ATP5J_HUMAN |
| P18859 | 3 | 6.6079 | K.RQTSGGPVDASSEYQQELERELFK.L | 3 | ATP5J_HUMAN |

| <i>Accession No*</i>                                                            | <i>Charge</i> | <i>XC(Max)**</i> | <i>Peptide*</i>                    | <i>TC***</i> | <i>Reference No*</i> |
|---------------------------------------------------------------------------------|---------------|------------------|------------------------------------|--------------|----------------------|
| P18859                                                                          | 3             | 5.4879           | R.QTSGGPVDASSEYQQELER.E            | 13           | ATP5J_HUMAN          |
| P18859                                                                          | 2             | 5.7255           | K.RQTSGGPVDASSEYQQELER.E           | 4            | ATP5J_HUMAN          |
| P18859                                                                          | 2             | 3.2312           | K.QMFGNADMNTFPTFK.F                | 3            | ATP5J_HUMAN          |
| P18859                                                                          | 2             | 3.0881           | K.QMFGNADM#NTFPTFK.F               | 2            | ATP5J_HUMAN          |
| P18859                                                                          | 2             | 5.1637           | K.LKQM#FGNADMNTFPTFK.F             | 5            | ATP5J_HUMAN          |
| P18859                                                                          | 1             | 3.0688           | K.FEVIEKPQA.-                      | 9            | ATP5J_HUMAN          |
| P18859                                                                          | 3             | 4.5632           | K.LKQM#FGNADM#NTFPTFK.F            | 3            | ATP5J_HUMAN          |
| P18859                                                                          | 2             | 2.9537           | K.QM#FGNADMNTFPTFK.F               | 2            | ATP5J_HUMAN          |
| P18859                                                                          | 3             | 4.3614           | K.LKQMFGNADM#NTFPTFK.F             | 1            | ATP5J_HUMAN          |
| P18859                                                                          | 2             | 4.6302           | K.LKQMFGNADMNTFPTFK.F              | 4            | ATP5J_HUMAN          |
| P18859                                                                          | 2             | 2.9165           | K.QM#FGNADM#NTFPTFK.F              | 1            | ATP5J_HUMAN          |
| P18859                                                                          | 2             | 4.5484           | K.FEDPKFEVIEKPQA.-                 | 10           | ATP5J_HUMAN          |
| <b><i>ATP-binding cassette sub-family F member 3 - Homo sapiens (Human)</i></b> |               |                  |                                    |              |                      |
| Q9NUQ8                                                                          | 3             | 5.4999           | R.LAEPQSQGNSQVLLDAPIQLSK.I         | 5            | ABCF3_HUMAN          |
| <b><i>ATP-dependent DNA helicase 2 subunit 2 - Homo sapiens (Human)</i></b>     |               |                  |                                    |              |                      |
| P13010                                                                          | 2             | 4.2988           | K.EEASGSSVTAEAAKK.F                | 4            | KU86_HUMAN           |
| P13010                                                                          | 2             | 2.8122           | R.AFREEAIK.F                       | 2            | KU86_HUMAN           |
| P13010                                                                          | 3             | 3.8583           | K.KASFEEASNQLINHIEQFLDTNETPYFM#K.S | 1            | KU86_HUMAN           |
| P13010                                                                          | 3             | 5.6725           | K.KASFEEASNQLINHIEQFLDTNETPYFMK.S  | 1            | KU86_HUMAN           |
| P13010                                                                          | 2             | 2.7023           | K.ALQEKVEIK.Q                      | 1            | KU86_HUMAN           |
| <b><i>ATP-dependent DNA helicase Q5 - Homo sapiens (Human)</i></b>              |               |                  |                                    |              |                      |
| O94762                                                                          | 2             | 3.5082           | R.SQQENPESQPQK.R                   | 1            | RECQ5_HUMAN          |
| O94762                                                                          | 2             | 2.962            | R.DQGTPEVQPTPAK.D                  | 2            | RECQ5_HUMAN          |
| <b><i>ATP-dependent RNA helicase A - Homo sapiens (Human)</i></b>               |               |                  |                                    |              |                      |
| Q08211                                                                          | 2             | 2.906            | R.DFVNYLVR.I                       | 1            | DHX9_HUMAN           |
| Q08211                                                                          | 2             | 3.0848           | K.AENNSEVGASGYVPGPTWDR.G           | 1            | DHX9_HUMAN           |
| <b><i>ATP-dependent RNA helicase DDX1 - Homo sapiens (Human)</i></b>            |               |                  |                                    |              |                      |
| Q92499                                                                          | 3             | 5.2676           | K.GHVDILAPTQELAALEK.E              | 4            | DDX1_HUMAN           |
| <b><i>ATP-dependent RNA helicase DDX19A - Homo sapiens (Human)</i></b>          |               |                  |                                    |              |                      |
| Q9NUU7                                                                          | 2             | 2.8065           | K.SMTNLQIKEEK.V                    | 2            | DD19A_HUMAN          |
| Q9NUU7                                                                          | 3             | 4.2074           | K.TSTTAETKDEEEKEDR.A               | 5            | DD19A_HUMAN          |
| <b><i>ATP-dependent RNA helicase DDX19B - Homo sapiens (Human)</i></b>          |               |                  |                                    |              |                      |
| Q9UMR2                                                                          | 3             | 4.5573           | K.TNANAETKDEEEKEDR.A               | 4            | DD19B_HUMAN          |

Accession No\* Charge XC(Max)\*\* Peptide\* TC\*\*\* Reference No\*

***AT-rich interactive domain-containing protein 1A - Homo sapiens (Human)***

|        |   |        |                         |   |             |
|--------|---|--------|-------------------------|---|-------------|
| O14497 | 2 | 5.4825 | R.EEAGGEAAAAAER.G       | 1 | ARI1A_HUMAN |
| O14497 | 3 | 4.2358 | K.AEQQQREEAGGEAAAAAER.G | 1 | ARI1A_HUMAN |
| O14497 | 2 | 4.1773 | K.AAAGQESEGPVGPPLGK.E   | 3 | ARI1A_HUMAN |

***AT-rich interactive domain-containing protein 1B - Homo sapiens (Human)***

|        |   |        |                                  |   |             |
|--------|---|--------|----------------------------------|---|-------------|
| Q8NFD5 | 3 | 5.8117 | K.DM#GAQYAAASPAWAAAQQR.S         | 5 | ARI1B_HUMAN |
| Q8NFD5 | 3 | 5.2004 | K.DMGAQYAAASPAWAAAQQR.S          | 2 | ARI1B_HUMAN |
| Q8NFD5 | 3 | 3.9746 | K.DSAAGGQADPPGPPLLSKPGDEDDAPPK.M | 2 | ARI1B_HUMAN |
| Q8NFD5 | 2 | 3.1415 | R.SHPAMSPGTPGPTMGR.S             | 1 | ARI1B_HUMAN |

***AT-rich interactive domain-containing protein 4B - Homo sapiens (Human)***

|        |   |        |                        |   |             |
|--------|---|--------|------------------------|---|-------------|
| Q4LE39 | 2 | 3.1914 | K.DIEVLSEDTDYEEDEVTK.K | 1 | ARI4B_HUMAN |
|--------|---|--------|------------------------|---|-------------|

***Autophagy-related protein 16-1 - Homo sapiens (Human)***

|        |   |        |                |   |             |
|--------|---|--------|----------------|---|-------------|
| Q676U5 | 2 | 2.9659 | R.LNAENEKDSR.R | 1 | A16L1_HUMAN |
|--------|---|--------|----------------|---|-------------|

***Autophagy-related protein 3 - Homo sapiens (Human)***

|        |   |        |                   |   |            |
|--------|---|--------|-------------------|---|------------|
| Q9NT62 | 2 | 4.4224 | K.ALEVAEYLTPVLK.E | 2 | ATG3_HUMAN |
|--------|---|--------|-------------------|---|------------|

***BAG family molecular chaperone regulator 2 - Homo sapiens (Human)***

|        |   |        |                                 |   |            |
|--------|---|--------|---------------------------------|---|------------|
| O95816 | 3 | 5.5693 | R.EAATAVEQEKEILLEMIHSIQNSQDMR.Q | 1 | BAG2_HUMAN |
|--------|---|--------|---------------------------------|---|------------|

***BAG family molecular chaperone regulator 3 - Homo sapiens (Human)***

|        |   |        |                       |   |            |
|--------|---|--------|-----------------------|---|------------|
| O95817 | 2 | 4.1145 | K.VQTILEKLEQK.A       | 2 | BAG3_HUMAN |
| O95817 | 2 | 4.954  | K.VQGLEQAVDNFEGKK.T   | 4 | BAG3_HUMAN |
| O95817 | 2 | 2.9946 | K.YLMIEEYLTK.E        | 2 | BAG3_HUMAN |
| O95817 | 3 | 4.2522 | R.KVQTILEKLEQK.A      | 3 | BAG3_HUMAN |
| O95817 | 2 | 2.9438 | K.ETPSSANGPSR.E       | 3 | BAG3_HUMAN |
| O95817 | 1 | 2.3358 | K.VEAILEK.V           | 3 | BAG3_HUMAN |
| O95817 | 1 | 2.2566 | R.KVQTILEK.L          | 1 | BAG3_HUMAN |
| O95817 | 2 | 2.9566 | R.SSLGSHQLPR.G        | 3 | BAG3_HUMAN |
| O95817 | 2 | 3.1042 | K.EVDSKPVSQKPPPPSEK.V | 1 | BAG3_HUMAN |
| O95817 | 2 | 4.0857 | R.TEAAAAAPQR.S        | 3 | BAG3_HUMAN |
| O95817 | 1 | 2.4382 | R.VPSEGPK.E           | 1 | BAG3_HUMAN |
| O95817 | 2 | 4.1938 | R.FRTEAAAAAPQR.S      | 5 | BAG3_HUMAN |
| O95817 | 2 | 4.0026 | K.ELLALDSVDPEGR.A     | 3 | BAG3_HUMAN |

***BAG family molecular chaperone regulator 4 - Homo sapiens (Human)***

|        |   |        |                     |   |            |
|--------|---|--------|---------------------|---|------------|
| O95429 | 2 | 4.5123 | K.VQYLEQEVEEFVGGK.K | 1 | BAG4_HUMAN |
|--------|---|--------|---------------------|---|------------|

| <i>Accession No*</i>                                         | <i>Charge</i> | <i>XC(Max)**</i> | <i>Peptide*</i>                      | <i>TC***</i> | <i>Reference No*</i> |
|--------------------------------------------------------------|---------------|------------------|--------------------------------------|--------------|----------------------|
| O95429                                                       | 3             | 4.0018           | R.SVPQSGPTVRPQEDAWASPGAYGMGGR.Y      | 1            | BAG4_HUMAN           |
| O95429                                                       | 2             | 3.4977           | K.DSSYPYSQSDQSM#NR.H                 | 3            | BAG4_HUMAN           |
| O95429                                                       | 2             | 3.5123           | K.DSSYPYSQSDQSMNR.H                  | 3            | BAG4_HUMAN           |
| <b><i>Band 4.1-like protein 1 - Homo sapiens (Human)</i></b> |               |                  |                                      |              |                      |
| Q9H4G0                                                       | 2             | 2.9871           | K.TETMTVSSLAIR.K                     | 2            | E41L1_HUMAN          |
| Q9H4G0                                                       | 3             | 4.8844           | R.KKIEPEAVLQTR.V                     | 6            | E41L1_HUMAN          |
| Q9H4G0                                                       | 2             | 3.2656           | R.SEAEEGEVR.T                        | 1            | E41L1_HUMAN          |
| Q9H4G0                                                       | 2             | 4.0953           | R.VSAM#DNTQQVDGSASVGR.E              | 5            | E41L1_HUMAN          |
| Q9H4G0                                                       | 2             | 4.4447           | R.VSAMDNTQQVDGSASVGR.E               | 6            | E41L1_HUMAN          |
| Q9H4G0                                                       | 3             | 4.852            | R.DEDGESGGQRSEAEEGEVR.T              | 2            | E41L1_HUMAN          |
| Q9H4G0                                                       | 2             | 3.0426           | K.GAAAMIPGPQTVATEIR.S                | 2            | E41L1_HUMAN          |
| Q9H4G0                                                       | 2             | 4.5368           | K.GAAAM#IPGPQTVATEIR.S               | 6            | E41L1_HUMAN          |
| Q9H4G0                                                       | 3             | 3.8478           | K.KIEPEAVLQTR.V                      | 5            | E41L1_HUMAN          |
| Q9H4G0                                                       | 2             | 3.6534           | K.GAPSQDDESGGIEDSPDR.G               | 3            | E41L1_HUMAN          |
| Q9H4G0                                                       | 2             | 2.7312           | R.EFIATTPSITTETISTTMENSLK.S          | 2            | E41L1_HUMAN          |
| <b><i>Band 4.1-like protein 3 - Homo sapiens (Human)</i></b> |               |                  |                                      |              |                      |
| Q9Y2J2                                                       | 2             | 5.1949           | K.AVLEQEETAASR.E                     | 9            | E41L3_HUMAN          |
| Q9Y2J2                                                       | 3             | 4.7667           | K.TITYESSQVDPGTDLEPGVLM#SAQTITSETTST | 1            | E41L3_HUMAN          |
| Q9Y2J2                                                       | 3             | 5.3241           | R.VVHASGDASYSAGDSGDAQAQPAFTGIK.G     | 11           | E41L3_HUMAN          |
| Q9Y2J2                                                       | 2             | 4.6411           | K.TESSGIETEPTVHHLPLSTEK.V            | 3            | E41L3_HUMAN          |
| Q9Y2J2                                                       | 2             | 3.2463           | K.LM#DGSEIFSLLESAR.K                 | 1            | E41L3_HUMAN          |
| Q9Y2J2                                                       | 2             | 4.1792           | K.HQTNISELKR.T                       | 5            | E41L3_HUMAN          |
| Q9Y2J2                                                       | 2             | 4.8556           | K.GISQTNLITVTPEKK.A                  | 5            | E41L3_HUMAN          |
| Q9Y2J2                                                       | 1             | 2.7913           | K.EVPVHTETK.T                        | 1            | E41L3_HUMAN          |
| Q9Y2J2                                                       | 2             | 5.2251           | R.TFLETSTDAVTNEWK.R                  | 4            | E41L3_HUMAN          |
| Q9Y2J2                                                       | 3             | 3.8722           | K.TITYESSQVDPGTDLEPGVLM#SAQTITSETTST | 1            | E41L3_HUMAN          |
| Q9Y2J2                                                       | 2             | 4.7015           | K.EGSALTEGAKEEGGEEVAK.A              | 6            | E41L3_HUMAN          |
| Q9Y2J2                                                       | 2             | 3.4194           | K.HQTNISELK.R                        | 5            | E41L3_HUMAN          |
| Q9Y2J2                                                       | 2             | 5.0717           | K.GISQTNLITVTPEK.K                   | 7            | E41L3_HUMAN          |
| Q9Y2J2                                                       | 3             | 4.2734           | R.KGEEVTPISAIRHEGK.S                 | 1            | E41L3_HUMAN          |
| Q9Y2J2                                                       | 3             | 6.8117           | K.GKEGSALTEGAKEEGGEEVAK.A            | 18           | E41L3_HUMAN          |
| Q9Y2J2                                                       | 2             | 4.5227           | K.TETISFGSVSPGGVK.L                  | 6            | E41L3_HUMAN          |
| Q9Y2J2                                                       | 2             | 5.0415           | R.TFLETSTDAVTNEWK.R                  | 3            | E41L3_HUMAN          |
| Q9Y2J2                                                       | 2             | 3.2933           | R.SLDGEVGTGQYATTK.G                  | 1            | E41L3_HUMAN          |
| Q9Y2J2                                                       | 3             | 4.6458           | K.AEEERDEEEDKR.R                     | 8            | E41L3_HUMAN          |
| Q9Y2J2                                                       | 3             | 5.5035           | R.RVVHASGDASYSAGDSGDAQAQPAFTGIK.G    | 1            | E41L3_HUMAN          |



| <i>Accession No*</i> | <i>Charge</i> | <i>XC(Max)**</i> | <i>Peptide*</i>          | <i>TC***</i> | <i>Reference No*</i> |
|----------------------|---------------|------------------|--------------------------|--------------|----------------------|
| Q9Y2J2               | 2             | 4.1479           | R.KGEEVTPISAIR.H         | 5            | E41L3_HUMAN          |
| Q9Y2J2               | 2             | 4.2986           | R.IVITGDADIDHDQALAQAIK.E | 1            | E41L3_HUMAN          |
| Q9Y2J2               | 2             | 2.9802           | K.VVVHKETEITPEDGED.-     | 1            | E41L3_HUMAN          |
| Q9Y2J2               | 2             | 3.3855           | K.VVQETVLVEERR.V         | 3            | E41L3_HUMAN          |
| Q9Y2J2               | 2             | 3.6069           | K.VVQETVLVEER.R          | 6            | E41L3_HUMAN          |
| Q9Y2J2               | 1             | 2.3918           | K.TQDDLMLK.H             | 2            | E41L3_HUMAN          |
| Q9Y2J2               | 2             | 2.7923           | K.TQDDLML#K.H            | 2            | E41L3_HUMAN          |

***Bardet-Biedl syndrome 4 protein - Homo sapiens (Human)***

|        |   |        |                                     |   |            |
|--------|---|--------|-------------------------------------|---|------------|
| Q96RK4 | 3 | 4.6464 | R.TLPSGAGGTSQFTKPPSLPLEPEPAVESSPTET | 1 | BBS4_HUMAN |
|--------|---|--------|-------------------------------------|---|------------|

***Barrier-to-autointegration factor - Homo sapiens (Human)***

|        |   |        |                               |   |           |
|--------|---|--------|-------------------------------|---|-----------|
| O75531 | 2 | 3.7197 | K.AYVVVLGQFLVLK.K             | 2 | BAF_HUMAN |
| O75531 | 3 | 5.4802 | R.DFVAEPM#GEKPVGSLAGIGEVLGK.K | 2 | BAF_HUMAN |
| O75531 | 3 | 5.4695 | R.DFVAEPMGEKPVGSLAGIGEVLGK.K  | 9 | BAF_HUMAN |

***Barttin - Homo sapiens (Human)***

|        |   |        |                                 |   |            |
|--------|---|--------|---------------------------------|---|------------|
| Q8WZ55 | 2 | 3.0832 | R.SLLAPEMGQPK.L                 | 1 | BSND_HUMAN |
| Q8WZ55 | 3 | 5.4807 | K.LGTSDGGEGGPGDVQAWMEAAVVIHK.G  | 1 | BSND_HUMAN |
| Q8WZ55 | 3 | 5.3169 | K.LGTSDGGEGGPGDVQAWM#EAAVVIHK.G | 2 | BSND_HUMAN |

***Basement membrane-specific heparan sulfate proteoglycan core protein precursor - Homo sapiens***

|        |   |        |                                     |   |            |
|--------|---|--------|-------------------------------------|---|------------|
| P98160 | 2 | 3.3038 | R.FDAGSGMATIR.H                     | 2 | PGBM_HUMAN |
| P98160 | 2 | 2.7491 | K.AQIHGGILR.L                       | 1 | PGBM_HUMAN |
| P98160 | 2 | 2.9337 | R.AHSSAGQQVAR.A                     | 2 | PGBM_HUMAN |
| P98160 | 2 | 3.798  | R.AM#DFNGILTIR.N                    | 2 | PGBM_HUMAN |
| P98160 | 4 | 7.8869 | R.AQLHGASEEPGHFSLTNAASTHTTNEGIFSPTP | 2 | PGBM_HUMAN |
| P98160 | 2 | 3.7942 | R.ASYAQQPAESR.V                     | 4 | PGBM_HUMAN |
| P98160 | 3 | 3.8777 | R.EHLLM#ALAGIDTLLIR.A               | 1 | PGBM_HUMAN |
| P98160 | 3 | 4.5241 | R.EHLLMALAGIDTLLIR.A                | 3 | PGBM_HUMAN |
| P98160 | 2 | 2.8554 | R.SYEIMFR.E                         | 2 | PGBM_HUMAN |
| P98160 | 2 | 2.8899 | R.EQAWQRPDGQPATR.E                  | 1 | PGBM_HUMAN |
| P98160 | 2 | 3.4962 | R.YELGSLAVLR.S                      | 4 | PGBM_HUMAN |
| P98160 | 2 | 4.4596 | K.SPAYTLVWTR.L                      | 4 | PGBM_HUMAN |
| P98160 | 2 | 3.1598 | R.RPDGQPATR.E                       | 8 | PGBM_HUMAN |
| P98160 | 3 | 5.3378 | R.AELLVTEAPSKPITVTVEEQR.S           | 1 | PGBM_HUMAN |
| P98160 | 2 | 3.2855 | R.LEGDTLIIPR.V                      | 2 | PGBM_HUMAN |
| P98160 | 2 | 3.1724 | R.SPGPNVAVNAK.G                     | 1 | PGBM_HUMAN |
| P98160 | 2 | 2.7022 | R.RLGTVPQFPR.A                      | 1 | PGBM_HUMAN |

| <i>Accession No*</i>                                                                     | <i>Charge</i> | <i>XC(Max)**</i> | <i>Peptide*</i>                    | <i>TC***</i> | <i>Reference No*</i> |
|------------------------------------------------------------------------------------------|---------------|------------------|------------------------------------|--------------|----------------------|
| P98160                                                                                   | 1             | 3.1636           | R.VTVTSEGGR.G                      | 5            | PGBM_HUMAN           |
| P98160                                                                                   | 3             | 3.7563           | R.PGAPPPQPLDLQHR.A                 | 1            | PGBM_HUMAN           |
| P98160                                                                                   | 3             | 4.3328           | R.LRSPVISIDPPSSTVQQGQDASFK.C       | 1            | PGBM_HUMAN           |
| P98160                                                                                   | 3             | 5.8419           | R.HLISTHFAPGDFQGFALVNPQR.N         | 2            | PGBM_HUMAN           |
| P98160                                                                                   | 3             | 3.8321           | R.GM#LEPVQRPDVVLVGAGYR.L           | 1            | PGBM_HUMAN           |
| P98160                                                                                   | 2             | 3.356            | R.GHTPTQPGALNQR.Q                  | 2            | PGBM_HUMAN           |
| P98160                                                                                   | 2             | 3.4004           | K.SKSPAYTLVWTR.L                   | 2            | PGBM_HUMAN           |
| P98160                                                                                   | 2             | 2.7704           | R.NELLHFER.A                       | 1            | PGBM_HUMAN           |
| P98160                                                                                   | 3             | 4.8179           | R.FLGDKVTSYGGELR.F                 | 4            | PGBM_HUMAN           |
| <b><i>Basic fibroblast growth factor receptor 1 precursor - Homo sapiens (Human)</i></b> |               |                  |                                    |              |                      |
| P11362                                                                                   | 2             | 3.1297           | K.IGPDNLPYVQILK.T                  | 2            | FGFR1_HUMAN          |
| <b><i>Basigin precursor - Homo sapiens (Human)</i></b>                                   |               |                  |                                    |              |                      |
| P35613                                                                                   | 3             | 4.0299           | R.SELHIENLNM#EADPGQYR.C            | 2            | BASI_HUMAN           |
| P35613                                                                                   | 2             | 4.7042           | K.GGVVLKEDALPGQK.T                 | 8            | BASI_HUMAN           |
| P35613                                                                                   | 2             | 3.2021           | K.SESVPPVTDWAWYK.I                 | 3            | BASI_HUMAN           |
| P35613                                                                                   | 2             | 5.1447           | R.SELHIENLNMEADPGQYR.C             | 5            | BASI_HUMAN           |
| P35613                                                                                   | 2             | 3.6449           | R.FFVSSSQGR.S                      | 3            | BASI_HUMAN           |
| <b><i>B-cell CLL/lymphoma 7 protein family member A - Homo sapiens (Human)</i></b>       |               |                  |                                    |              |                      |
| Q4VC05                                                                                   | 2             | 3.8166           | K.MKLEASQQNSEEM.-                  | 1            | BCL7A_HUMAN          |
| Q4VC05                                                                                   | 2             | 2.7567           | K.VDEAQADGK.E                      | 1            | BCL7A_HUMAN          |
| Q4VC05                                                                                   | 2             | 3.2909           | K.M#KLEASQQNSEEM.-                 | 1            | BCL7A_HUMAN          |
| <b><i>B-cell CLL/lymphoma 9-like protein. - Homo sapiens (Human)</i></b>                 |               |                  |                                    |              |                      |
| Q86UU0                                                                                   | 2             | 2.9224           | R.SVSVDSGEQR.E                     | 1            | Q86UU0_HUMAN         |
| <b><i>B-cell lymphoma 9 protein - Homo sapiens (Human)</i></b>                           |               |                  |                                    |              |                      |
| O00512                                                                                   | 2             | 3.0548           | K.TVASSDDDSPPAR.S                  | 1            | BCL9_HUMAN           |
| <b><i>B-cell lymphoma/leukemia 10 - Homo sapiens (Human)</i></b>                         |               |                  |                                    |              |                      |
| O95999                                                                                   | 3             | 4.2565           | R.ASTVMYHPEGESSTTPFFSTNSSLNLPVLEVG | 1            | BCL10_HUMAN          |
| <b><i>B-cell receptor-associated protein 31 - Homo sapiens (Human)</i></b>               |               |                  |                                    |              |                      |
| P51572                                                                                   | 2             | 3.165            | K.AENQVLAMR.K                      | 1            | BAP31_HUMAN          |
| <b><i>Bcl2 antagonist of cell death - Homo sapiens (Human)</i></b>                       |               |                  |                                    |              |                      |
| Q92934                                                                                   | 2             | 4.7482           | R.GLGSPAGDGPSSGSK.H                | 5            | BAD_HUMAN            |
| Q92934                                                                                   | 3             | 5.0161           | R.HSSYPAGTEDDEGMGEEPSPFR.G         | 3            | BAD_HUMAN            |
| Q92934                                                                                   | 2             | 2.8888           | R.VFQSWWDR.N                       | 1            | BAD_HUMAN            |

Accession No\* Charge XC(Max)\*\* Peptide\* TC\*\*\* Reference No\*

***BCL2/adenovirus E1B 19 kDa protein-interacting protein 3 - Homo sapiens (Human)***

|        |   |        |                  |   |             |
|--------|---|--------|------------------|---|-------------|
| Q12983 | 2 | 3.7772 | K.NSSQSEEDDIER.R | 1 | BNIP3_HUMAN |
| Q12983 | 2 | 3.5144 | K.ILLDAQHESGR.S  | 2 | BNIP3_HUMAN |
| Q12983 | 2 | 3.5767 | R.ASETDTHSIGEK.N | 4 | BNIP3_HUMAN |

***Bcl-2-associated transcription factor 1 - Homo sapiens (Human)***

|        |   |        |                             |   |             |
|--------|---|--------|-----------------------------|---|-------------|
| Q9NYF8 | 3 | 3.9628 | R.FTDEESRVFLDR.G            | 1 | BCLF1_HUMAN |
| Q9NYF8 | 1 | 2.3819 | K.SVLADQGK.S                | 2 | BCLF1_HUMAN |
| Q9NYF8 | 2 | 4.6097 | K.FNDSEGDDTEETEDYR.Q        | 4 | BCLF1_HUMAN |
| Q9NYF8 | 3 | 4.7767 | K.GRAEGEWEDQEALDYFSDKESGK.Q | 2 | BCLF1_HUMAN |
| Q9NYF8 | 3 | 4.5246 | K.QKFNDSEGDDTEETEDYR.Q      | 2 | BCLF1_HUMAN |
| Q9NYF8 | 2 | 2.8954 | K.RFTDEESR.V                | 7 | BCLF1_HUMAN |
| Q9NYF8 | 2 | 4.7388 | K.ETGYVVERPSTTK.D           | 3 | BCLF1_HUMAN |
| Q9NYF8 | 2 | 3.1393 | R.KSVLADQGK.S               | 2 | BCLF1_HUMAN |
| Q9NYF8 | 3 | 3.9612 | K.RPKEEEEWDPEYTPK.S         | 2 | BCLF1_HUMAN |
| Q9NYF8 | 3 | 5.3821 | K.SQEEPKDTFEHDPSESIDEFNK.S  | 2 | BCLF1_HUMAN |
| Q9NYF8 | 2 | 2.8326 | K.STFREESPLR.I              | 1 | BCLF1_HUMAN |
| Q9NYF8 | 2 | 3.453  | R.NTEEEGLKYK.S              | 3 | BCLF1_HUMAN |

***Bcl-2-like 13 protein - Homo sapiens (Human)***

|         |   |        |                                   |   |             |
|---------|---|--------|-----------------------------------|---|-------------|
| Q9B XK5 | 2 | 2.9679 | K.SSPATSLFVELDEEEVK.A             | 1 | B2L13_HUMAN |
| Q9B XK5 | 3 | 6.9297 | K.SENSSNSDIVHVEKEEVPEGMEEAAVASVVL | 2 | B2L13_HUMAN |
| Q9B XK5 | 2 | 4.7083 | R.EESLVEELSPASEK.K                | 3 | B2L13_HUMAN |
| Q9B XK5 | 2 | 2.7034 | K.SLDSNGAGEK.S                    | 1 | B2L13_HUMAN |

***Beta-2-glycoprotein 1 precursor - Homo sapiens (Human)***

|        |   |        |                               |   |            |
|--------|---|--------|-------------------------------|---|------------|
| P02749 | 3 | 3.7464 | K.WSPELPVCAPIICPPPSIPTFATLR.V | 2 | APOH_HUMAN |
| P02749 | 1 | 2.2596 | K.EHSSLAFWK.T                 | 2 | APOH_HUMAN |
| P02749 | 2 | 3.4836 | K.TDASDVKPC.-                 | 5 | APOH_HUMAN |
| P02749 | 2 | 3.1826 | K.ATVVYQGER.V                 | 4 | APOH_HUMAN |
| P02749 | 2 | 3.825  | K.KATVVYQGER.V                | 4 | APOH_HUMAN |

***Beta-catenin-interacting protein 1 - Homo sapiens (Human)***

|        |   |        |                     |   |             |
|--------|---|--------|---------------------|---|-------------|
| Q9NSA3 | 2 | 3.8554 | K.M#GSNLTASEEEFLR.T | 1 | CNBP1_HUMAN |
| Q9NSA3 | 2 | 4.262  | K.MGSNLTASEEEFLR.T  | 3 | CNBP1_HUMAN |
| Q9NSA3 | 2 | 3.3951 | K.SPEEMYIQQK.V      | 1 | CNBP1_HUMAN |

***Betaine--homocysteine S-methyltransferase 1 - Homo sapiens (Human)***

|        |   |        |               |   |             |
|--------|---|--------|---------------|---|-------------|
| Q93088 | 1 | 4.0169 | K.GTAELMQQK.E | 5 | BHMT1_HUMAN |
|--------|---|--------|---------------|---|-------------|

| <i>Accession No*</i>                                                                               | <i>Charge</i> | <i>XC(Max)**</i> | <i>Peptide*</i>                  | <i>TC***</i> | <i>Reference No*</i> |
|----------------------------------------------------------------------------------------------------|---------------|------------------|----------------------------------|--------------|----------------------|
| Q93088                                                                                             | 2             | 3.5543           | K.GTAELM#QQK.E                   | 2            | BHMT1_HUMAN          |
| Q93088                                                                                             | 3             | 3.7574           | R.PYNPSMSKPDGWSVTK.G             | 1            | BHMT1_HUMAN          |
| Q93088                                                                                             | 3             | 5.0538           | R.IASGRPYNPSMSKPDGWSVTK.G        | 2            | BHMT1_HUMAN          |
| Q93088                                                                                             | 2             | 3.7716           | K.VFLQQLEVFMK.K                  | 2            | BHMT1_HUMAN          |
| Q93088                                                                                             | 2             | 4.1603           | K.EATTEQQLKELFEK.Q               | 3            | BHMT1_HUMAN          |
| Q93088                                                                                             | 3             | 4.0816           | K.QGFIDLPEFPFGLEPR.V             | 3            | BHMT1_HUMAN          |
| Q93088                                                                                             | 1             | 2.741            | K.EATTEQQLK.E                    | 5            | BHMT1_HUMAN          |
| Q93088                                                                                             | 2             | 3.6383           | K.VFLQQLEVFM#K.K                 | 2            | BHMT1_HUMAN          |
| <b><i>BH3-interacting domain death agonist - Homo sapiens (Human)</i></b>                          |               |                  |                                  |              |                      |
| P55957                                                                                             | 2             | 2.996            | R.IEADSESQEDIIR.N                | 2            | BID_HUMAN            |
| <b><i>BIN3 domain-containing protein 1 - Homo sapiens (Human)</i></b>                              |               |                  |                                  |              |                      |
| Q7L2J0                                                                                             | 3             | 3.8847           | R.RGGGGTELGPAPPRPR.N             | 1            | BN3D1_HUMAN          |
| <b><i>Biogenesis of lysosome-related organelles complex-1 subunit 3 - Homo sapiens (Human)</i></b> |               |                  |                                  |              |                      |
| Q6QNY0                                                                                             | 2             | 4.058            | R.RPETVVPGEATETDSER.S            | 2            | BL1S3_HUMAN          |
| <b><i>Biotinidase precursor - Homo sapiens (Human)</i></b>                                         |               |                  |                                  |              |                      |
| P43251                                                                                             | 2             | 5.086            | R.TSIYPFLDFMPSPQVVR.W            | 1            | BTD_HUMAN            |
| <b><i>BMP-2-inducible protein kinase - Homo sapiens (Human)</i></b>                                |               |                  |                                  |              |                      |
| Q9NSY1                                                                                             | 2             | 4.8377           | R.FPAAGLEQEEFDVFTK.A             | 2            | BMP2K_HUMAN          |
| Q9NSY1                                                                                             | 2             | 3.4265           | K.SESNEDLFGLVPFDEITGSQQK.V       | 1            | BMP2K_HUMAN          |
| Q9NSY1                                                                                             | 2             | 2.7572           | K.KTSVQGVQK.G                    | 1            | BMP2K_HUMAN          |
| <b><i>Bola-like protein 1 - Homo sapiens (Human)</i></b>                                           |               |                  |                                  |              |                      |
| Q9Y3E2                                                                                             | 3             | 4.6431           | R.LVHAALAEELGGPVHALAIQAR.T       | 2            | BOLA1_HUMAN          |
| Q9Y3E2                                                                                             | 2             | 3.1301           | R.FEGLSPLQR.H                    | 2            | BOLA1_HUMAN          |
| Q9Y3E2                                                                                             | 3             | 3.9555           | R.NESGGHAVPPGSETHFR.V            | 1            | BOLA1_HUMAN          |
| Q9Y3E2                                                                                             | 3             | 5.5207           | R.TKLEEALSPEVLELR.N              | 3            | BOLA1_HUMAN          |
| <b><i>Bola-like protein 3 - Homo sapiens (Human)</i></b>                                           |               |                  |                                  |              |                      |
| Q53S33                                                                                             | 3             | 4.4474           | R.TVQQHQMVNQALKEEIK.E            | 1            | BOLA3_HUMAN          |
| Q53S33                                                                                             | 1             | 2.2368           | R.IFTSVPK.R                      | 1            | BOLA3_HUMAN          |
| <b><i>Brain acid soluble protein 1 - Homo sapiens (Human)</i></b>                                  |               |                  |                                  |              |                      |
| P80723                                                                                             | 3             | 4.1511           | K.EEAPKAEPEKTEGAAEAK.A           | 1            | BASP_HUMAN           |
| P80723                                                                                             | 2             | 3.2085           | K.AEPEKTEGAAEAK.A                | 1            | BASP_HUMAN           |
| P80723                                                                                             | 3             | 5.829            | K.AEGAATEEEGTPKESEPQAAAEPAAEAK.E | 2            | BASP_HUMAN           |
| P80723                                                                                             | 2             | 4.7948           | K.AEGAATEEEGTPK.E                | 7            | BASP_HUMAN           |

| <i>Accession No*</i> | <i>Charge</i> | <i>XC(Max)**</i> | <i>Peptide*</i>                  | <i>TC***</i> | <i>Reference No*</i> |
|----------------------|---------------|------------------|----------------------------------|--------------|----------------------|
| P80723               | 2             | 4.8662           | K.AAEAAAAPAESAAPAAGEEPSKEEGEPK.K | 2            | BASP_HUMAN           |
| P80723               | 2             | 4.2622           | K.DAAAAKEEAPK.A                  | 4            | BASP_HUMAN           |
| P80723               | 3             | 4.4809           | K.AEPPKAPEQEQAAPGPAAGGEAPK.A     | 11           | BASP_HUMAN           |
| P80723               | 2             | 3.4558           | K.EKPDQDAEGKAEK.E                | 2            | BASP_HUMAN           |
| P80723               | 2             | 3.2777           | K.ESEPQAAAEPAEK.E                | 4            | BASP_HUMAN           |
| P80723               | 2             | 2.7659           | K.ETPAATEAPSSTPK.A               | 3            | BASP_HUMAN           |
| P80723               | 3             | 4.7311           | K.KAEGAATEEEGTPK.E               | 4            | BASP_HUMAN           |
| P80723               | 2             | 5.2006           | K.KTEAPAAPAAQETK.S               | 3            | BASP_HUMAN           |
| P80723               | 2             | 4.2918           | K.SDGAPASDSKPGSSEAAPSSK.E        | 6            | BASP_HUMAN           |
| P80723               | 3             | 7.0157           | K.AQGPAAEAEPKVEAPAANSQDTVTVKE.-  | 5            | BASP_HUMAN           |
| P80723               | 2             | 4.7777           | K.DKKAEGAATEEEGTPK.E             | 7            | BASP_HUMAN           |

***Brain-specific angiogenesis inhibitor 1-associated protein 2 - Homo sapiens (Human)***

|        |   |        |                           |   |             |
|--------|---|--------|---------------------------|---|-------------|
| Q9UQB8 | 3 | 4.8756 | K.QRPYSVAVPAFSQGLDDYGAR.S | 2 | BAIP2_HUMAN |
| Q9UQB8 | 2 | 3.8468 | K.AIFSHAAGDNSTLLSFK.E     | 1 | BAIP2_HUMAN |
| Q9UQB8 | 2 | 3.3632 | K.LSDSYSNTLPVR.K          | 1 | BAIP2_HUMAN |

***Brain-specific angiogenesis inhibitor 1-associated protein 2-like protein 1 - Homo sapiens (Human)***

|        |   |        |                     |   |             |
|--------|---|--------|---------------------|---|-------------|
| Q9UHR4 | 2 | 3.8899 | R.VNNSTGTSEDPSLQR.S | 2 | BI2L1_HUMAN |
|--------|---|--------|---------------------|---|-------------|

***Brain-specific angiogenesis inhibitor 1-associated protein 2-like protein 2 - Homo sapiens (Human)***

|        |   |        |                     |   |             |
|--------|---|--------|---------------------|---|-------------|
| Q6UXY1 | 2 | 3.1164 | K.LEGSSASGWFPAYVK.A | 2 | BI2L2_HUMAN |
|--------|---|--------|---------------------|---|-------------|

***Brain-specific polypeptide PEP-19 - Homo sapiens (Human)***

|        |   |        |                        |   |             |
|--------|---|--------|------------------------|---|-------------|
| P48539 | 2 | 3.1845 | R.AAVAIQSQFRK.F        | 2 | PEP19_HUMAN |
| P48539 | 2 | 3.6073 | R.AAVAIQSQFRK.K        | 5 | PEP19_HUMAN |
| P48539 | 2 | 2.8222 | K.VQEEFDIDM#DAPETER.A  | 1 | PEP19_HUMAN |
| P48539 | 3 | 4.4366 | K.KVQEEFDIDMDAPETER.A  | 4 | PEP19_HUMAN |
| P48539 | 3 | 4.289  | K.KVQEEFDIDM#DAPETER.A | 2 | PEP19_HUMAN |
| P48539 | 2 | 3.7353 | K.VQEEFDIDMDAPETER.A   | 3 | PEP19_HUMAN |

***Breakpoint cluster region protein - Homo sapiens (Human)***

|        |   |        |                   |   |           |
|--------|---|--------|-------------------|---|-----------|
| P11274 | 2 | 3.438  | K.VNDKEVSDR.I     | 1 | BCR_HUMAN |
| P11274 | 2 | 3.3839 | R.AAQAPDGASEPR.A  | 3 | BCR_HUMAN |
| P11274 | 2 | 3.8718 | R.RLEQEVNQR.F     | 2 | BCR_HUMAN |
| P11274 | 2 | 4.5201 | R.ISSLGSQAMQMER.K | 3 | BCR_HUMAN |
| P11274 | 2 | 3.798  | R.MIYLQTLAK.E     | 3 | BCR_HUMAN |
| P11274 | 2 | 4.2691 | R.RAAQAPDGASEPR.A | 4 | BCR_HUMAN |

***Bromodomain-containing protein 4 - Homo sapiens (Human)***

| <i>Accession No*</i>                                                                         | <i>Charge</i> | <i>XC(Max)**</i> | <i>Peptide*</i>                    | <i>TC***</i> | <i>Reference No*</i> |
|----------------------------------------------------------------------------------------------|---------------|------------------|------------------------------------|--------------|----------------------|
| O60885                                                                                       | 2             | 2.9064           | R.AASVVQPQPLVVVK.E                 | 1            | BRD4_HUMAN           |
| <b><i>BSD domain-containing protein 1 - Homo sapiens (Human)</i></b>                         |               |                  |                                    |              |                      |
| Q9NW68                                                                                       | 2             | 3.6216           | R.VFELNSDSGK.S                     | 1            | BSDC1_HUMAN          |
| Q9NW68                                                                                       | 2             | 3.5568           | K.LATEGSSGATEK.M                   | 2            | BSDC1_HUMAN          |
| Q9NW68                                                                                       | 2             | 4.765            | K.KGEISELLVGSPSIR.A                | 2            | BSDC1_HUMAN          |
| Q9NW68                                                                                       | 2             | 4.9454           | K.GLSDFLGVISDTFAPSPDK.T            | 4            | BSDC1_HUMAN          |
| <b><i>BTB/POZ domain-containing protein KCTD12 - Homo sapiens (Human)</i></b>                |               |                  |                                    |              |                      |
| Q96CX2                                                                                       | 2             | 2.7022           | R.MFTQQQPQELAR.D                   | 1            | KCD12_HUMAN          |
| <b><i>BUD13 homolog - Homo sapiens (Human)</i></b>                                           |               |                  |                                    |              |                      |
| Q9BRD0                                                                                       | 2             | 3.3948           | R.HGSSDISSPR.R                     | 1            | BUD13_HUMAN          |
| <b><i>Butyrate response factor 2 - Homo sapiens (Human)</i></b>                              |               |                  |                                    |              |                      |
| P47974                                                                                       | 2             | 2.8116           | K.GGGGSQINSTR.Y                    | 1            | TISD_HUMAN           |
| <b><i>C4b-binding protein beta chain precursor - Homo sapiens (Human)</i></b>                |               |                  |                                    |              |                      |
| P20851                                                                                       | 2             | 2.9283           | K.ALLAFQESK.N                      | 1            | C4BB_HUMAN           |
| <b><i>Cadherin EGF LAG seven-pass G-type receptor 1 precursor - Homo sapiens (Human)</i></b> |               |                  |                                    |              |                      |
| Q9NYQ6                                                                                       | 2             | 3.458            | R.LASSQPPEQR.K                     | 2            | CELR1_HUMAN          |
| Q9NYQ6                                                                                       | 2             | 3.0368           | R.TGSAQADGSDSEKP.-                 | 1            | CELR1_HUMAN          |
| <b><i>Cadherin EGF LAG seven-pass G-type receptor 2 precursor - Homo sapiens (Human)</i></b> |               |                  |                                    |              |                      |
| Q9HCU4                                                                                       | 2             | 2.8681           | R.LLEGSGGSPSEVFEIDPR.S             | 1            | CELR2_HUMAN          |
| Q9HCU4                                                                                       | 3             | 4.1991           | R.AIDPDEGEAGRLEYTMDALFDSR.S        | 1            | CELR2_HUMAN          |
| <b><i>Cadherin-13 precursor - Homo sapiens (Human)</i></b>                                   |               |                  |                                    |              |                      |
| P55290                                                                                       | 2             | 3.0556           | R.YEVSSPYFK.V                      | 2            | CAD13_HUMAN          |
| P55290                                                                                       | 2             | 3.4875           | K.DIQGSLQDIFK.F                    | 2            | CAD13_HUMAN          |
| P55290                                                                                       | 2             | 4.1777           | R.SIVVSPILIPENQR.Q                 | 3            | CAD13_HUMAN          |
| P55290                                                                                       | 2             | 3.641            | R.INENTGSVSVTR.T                   | 1            | CAD13_HUMAN          |
| <b><i>Cadherin-16 precursor - Homo sapiens (Human)</i></b>                                   |               |                  |                                    |              |                      |
| O75309                                                                                       | 3             | 5.4513           | R.AFQVDPTSGSVTLGVLP.LR.A           | 3            | CAD16_HUMAN          |
| O75309                                                                                       | 1             | 3.9236           | R.LGALALSPK.G                      | 4            | CAD16_HUMAN          |
| O75309                                                                                       | 2             | 4.4066           | K.ATEGPFAM#DPDSGFLLVTR.A           | 2            | CAD16_HUMAN          |
| O75309                                                                                       | 2             | 4.2738           | K.ATEGPFAMDPDSGFLLVTR.A            | 5            | CAD16_HUMAN          |
| O75309                                                                                       | 3             | 5.0221           | K.DPDLASGHGPYSFTLGNPNTVQR.D        | 2            | CAD16_HUMAN          |
| O75309                                                                                       | 3             | 4.0335           | K.FSGEVHTAQLSQGAQPGDITYTLVLEAQTDEP | 1            | CAD16_HUMAN          |
| O75309                                                                                       | 2             | 3.7619           | K.GSTSLDHALER.T                    | 4            | CAD16_HUMAN          |

| <i>Accession No*</i> | <i>Charge</i> | <i>XC(Max)**</i> | <i>Peptide*</i>                     | <i>TC***</i> | <i>Reference No*</i> |
|----------------------|---------------|------------------|-------------------------------------|--------------|----------------------|
| O75309               | 3             | 5.3801           | K.NLSYEAAPSHEVVVVVQSVAK.L           | 1            | CAD16_HUMAN          |
| O75309               | 2             | 3.2474           | R.LMDFAIER.G                        | 3            | CAD16_HUMAN          |
| O75309               | 3             | 4.2986           | R.FHILSQAPAQSPDM#FQLEPR.L           | 1            | CAD16_HUMAN          |
| O75309               | 3             | 3.9863           | R.VMPPPKLDQESYEASVPISAPAGSFLLTIQPSD | 1            | CAD16_HUMAN          |
| O75309               | 3             | 4.358            | R.ELDREAQAEYLLQVR.A                 | 3            | CAD16_HUMAN          |
| O75309               | 2             | 3.4888           | R.GDTEGTFLDWEPSGHVR.L               | 2            | CAD16_HUMAN          |
| O75309               | 2             | 4.9142           | R.EGAEGQIVLSGDSGK.A                 | 11           | CAD16_HUMAN          |
| O75309               | 3             | 5.1987           | R.LSAEDADAPGSPNSHVYQLLSPEPEDGVEGR   | 2            | CAD16_HUMAN          |
| O75309               | 2             | 4.6551           | R.FHILSQAPAQSPDMFQLEPR.L            | 2            | CAD16_HUMAN          |
| O75309               | 4             | 4.9802           | R.QDHGLIVSGPSKDPDLASGHGYPYSFTLGPNT  | 1            | CAD16_HUMAN          |
| O75309               | 2             | 3.5365           | R.TYQLLVQVK.D                       | 5            | CAD16_HUMAN          |

***Cadherin-2 precursor - Homo sapiens (Human)***

|        |   |        |                                     |   |             |
|--------|---|--------|-------------------------------------|---|-------------|
| P19022 | 2 | 3.3033 | R.FAIQTDPNSENDGLVTVVKPIDFETNR.M     | 1 | CADH2_HUMAN |
| P19022 | 2 | 3.5321 | R.M#FVLTVAAENQVPLAK.G               | 1 | CADH2_HUMAN |
| P19022 | 1 | 2.3379 | K.LADMYGGGDD.-                      | 1 | CADH2_HUMAN |
| P19022 | 2 | 2.904  | R.YMQQNR.Y                          | 2 | CADH2_HUMAN |
| P19022 | 2 | 5.433  | K.FLEAGIYEVPIITDSGNPPK.S            | 7 | CADH2_HUMAN |
| P19022 | 3 | 5.5402 | R.SAAPHPGDIGDFINEGLK.A              | 2 | CADH2_HUMAN |
| P19022 | 3 | 4.1551 | R.QEEGLHAGTMLTTFTAQDPDR.Y           | 2 | CADH2_HUMAN |
| P19022 | 2 | 2.7694 | R.YM#QQNIR.Y                        | 1 | CADH2_HUMAN |
| P19022 | 2 | 3.1317 | R.GFPFQELVR.I                       | 5 | CADH2_HUMAN |
| P19022 | 3 | 5.7319 | K.YDEEGGGEEDQDYDLSQLQQPDTVEPDAIKPV  | 1 | CADH2_HUMAN |
| P19022 | 2 | 2.896  | K.LSDPANWLK.I                       | 2 | CADH2_HUMAN |
| P19022 | 3 | 3.9326 | R.YSVTGPADQPPTGIFIINPISGQLSVTKPLDR. | 1 | CADH2_HUMAN |
| P19022 | 2 | 3.4606 | R.LNGDFAQLNLK.I                     | 2 | CADH2_HUMAN |

***Cadherin-6 precursor - Homo sapiens (Human)***

|        |   |        |                    |   |             |
|--------|---|--------|--------------------|---|-------------|
| P55285 | 2 | 4.2505 | K.IHDINDNEPIFTK.E  | 2 | CADH6_HUMAN |
| P55285 | 2 | 3.0162 | K.TALLNMDR.E       | 1 | CADH6_HUMAN |
| P55285 | 2 | 3.2966 | R.DIVPEALFLPR.R    | 2 | CADH6_HUMAN |
| P55285 | 1 | 3.0629 | R.FLYLGPFK.D       | 4 | CADH6_HUMAN |
| P55285 | 2 | 3.7842 | K.TPESSPPGTPIGR.I  | 3 | CADH6_HUMAN |
| P55285 | 2 | 4.4306 | R.IVVEDVDEPPVFSK.L | 3 | CADH6_HUMAN |
| P55285 | 2 | 2.7469 | K.DNTAGILTR.K      | 1 | CADH6_HUMAN |
| P55285 | 2 | 4.1718 | K.LHSDQDRGDGSLK.Y  | 2 | CADH6_HUMAN |
| P55285 | 2 | 3.3355 | K.VEASNPYVEPR.F    | 5 | CADH6_HUMAN |
| P55285 | 2 | 2.864  | K.LAYILQIR.E       | 1 | CADH6_HUMAN |

| <i>Accession No*</i>                                                                                 | <i>Charge</i> | <i>XC(Max)**</i> | <i>Peptide*</i>              | <i>TC***</i> | <i>Reference No*</i> |
|------------------------------------------------------------------------------------------------------|---------------|------------------|------------------------------|--------------|----------------------|
| P55285                                                                                               | 2             | 3.8707           | R.TGRPVEPESEFIK.I            | 2            | CADH6_HUMAN          |
| <b><i>Cadherin-9 precursor - Homo sapiens (Human)</i></b>                                            |               |                  |                              |              |                      |
| Q9ULB4                                                                                               | 2             | 3.5              | K.QNLDFENQMPLYTLR.V          | 2            | CADH9_HUMAN          |
| Q9ULB4                                                                                               | 2             | 3.7076           | K.VVYSILQGQPYFSVDPESGIIK.T   | 1            | CADH9_HUMAN          |
| <b><i>Calbindin - Homo sapiens (Human)</i></b>                                                       |               |                  |                              |              |                      |
| P05937                                                                                               | 2             | 3.8974           | R.KKAGLELSPEMK.T             | 1            | CALB1_HUMAN          |
| P05937                                                                                               | 2             | 3.2721           | K.AGLELSPEM#K.T              | 4            | CALB1_HUMAN          |
| P05937                                                                                               | 1             | 3.0874           | K.NIM#ALSDGGK.L              | 6            | CALB1_HUMAN          |
| P05937                                                                                               | 3             | 4.7337           | K.LFDSNNDGKLELTEMAR.L        | 11           | CALB1_HUMAN          |
| P05937                                                                                               | 2             | 3.3489           | K.AGLELSPEMK.T               | 6            | CALB1_HUMAN          |
| P05937                                                                                               | 3             | 3.8527           | K.TVDDTKLAEYTDLM#LK.L        | 1            | CALB1_HUMAN          |
| P05937                                                                                               | 4             | 4.8679           | K.YDTDHSGFIETEELKNFLKDLLEK.A | 1            | CALB1_HUMAN          |
| P05937                                                                                               | 2             | 4.1984           | K.TFVDQYQRDDGK.I             | 7            | CALB1_HUMAN          |
| P05937                                                                                               | 3             | 5.3273           | R.KYDTHSGFIETEELK.N          | 6            | CALB1_HUMAN          |
| P05937                                                                                               | 3             | 4.4835           | K.IGIVELAHVLPTEENFLLFR.C     | 1            | CALB1_HUMAN          |
| P05937                                                                                               | 2             | 3.9091           | K.TVDDTKLAEYTDLMMLK.L        | 3            | CALB1_HUMAN          |
| P05937                                                                                               | 3             | 5.1015           | K.ELQNLIQELQQAR.K            | 7            | CALB1_HUMAN          |
| P05937                                                                                               | 2             | 3.6385           | K.LAEYTDLMMLK.L              | 1            | CALB1_HUMAN          |
| P05937                                                                                               | 2             | 5.4651           | K.NKQDLINNITTYK.K            | 11           | CALB1_HUMAN          |
| P05937                                                                                               | 2             | 3.9157           | K.KAGLELSPEMK.T              | 2            | CALB1_HUMAN          |
| P05937                                                                                               | 3             | 4.97             | K.LFDSNNDGKLELTEM#AR.L       | 11           | CALB1_HUMAN          |
| P05937                                                                                               | 2             | 5.1652           | K.NKQDLINNITTYKK.N           | 5            | CALB1_HUMAN          |
| P05937                                                                                               | 2             | 3.8385           | K.TFVDQYQR.D                 | 11           | CALB1_HUMAN          |
| P05937                                                                                               | 2             | 2.8235           | K.KNIM#ALSDGGK.L             | 2            | CALB1_HUMAN          |
| P05937                                                                                               | 2             | 3.3528           | K.KNIMALSDGGK.L              | 3            | CALB1_HUMAN          |
| P05937                                                                                               | 2             | 3.7512           | K.LAEYTDLM#LK.L              | 3            | CALB1_HUMAN          |
| P05937                                                                                               | 1             | 3.3654           | K.NIMALSDGGK.L               | 6            | CALB1_HUMAN          |
| <b><i>Calcium signal-modulating cyclophilin ligand - Homo sapiens (Human)</i></b>                    |               |                  |                              |              |                      |
| P49069                                                                                               | 2             | 3.8033           | R.VVLGDSVSTGTTDQQGGVAEVK.G   | 2            | CAMLG_HUMAN          |
| <b><i>Calcium/calmodulin-dependent protein kinase II inhibitor alpha - Homo sapiens (Human)</i></b>  |               |                  |                              |              |                      |
| Q7Z7J9                                                                                               | 2             | 4.4547           | R.LQDTNFFGAGQNK.R            | 2            | Q7Z7J9_HUMAN         |
| <b><i>Calcium/calmodulin-dependent protein kinase type II delta chain - Homo sapiens (Human)</i></b> |               |                  |                              |              |                      |
| Q13557                                                                                               | 2             | 3.366            | R.LTQYMDGSGMPK.T             | 4            | KCC2D_HUMAN          |
| <b><i>Calcium-binding protein p22 - Homo sapiens (Human)</i></b>                                     |               |                  |                              |              |                      |



| <i>Accession No*</i>                                                         | <i>Charge</i> | <i>XC(Max)**</i> | <i>Peptide*</i>          | <i>TC***</i> | <i>Reference No*</i> |
|------------------------------------------------------------------------------|---------------|------------------|--------------------------|--------------|----------------------|
| Q99653                                                                       | 2             | 3.9281           | R.IPELAINPLGDR.I         | 2            | CHP1_HUMAN           |
| Q99653                                                                       | 2             | 3.818            | R.IINAFFPEGEDQVNFR.G     | 3            | CHP1_HUMAN           |
| Q99653                                                                       | 3             | 5.2805           | R.EDFQRIPELAINPLGDR.I    | 2            | CHP1_HUMAN           |
| Q99653                                                                       | 2             | 3.2556           | R.TIQEADQDGDSAISFTEFVK.V | 1            | CHP1_HUMAN           |
| <b><i>Calcium-regulated heat stable protein 1 - Homo sapiens (Human)</i></b> |               |                  |                          |              |                      |
| Q9Y2V2                                                                       | 2             | 2.7199           | K.HETWSGHVISS.-          | 1            | CHSP1_HUMAN          |
| Q9Y2V2                                                                       | 1             | 2.1372           | R.TFSATVR.A              | 1            | CHSP1_HUMAN          |
| <b><i>Calcyclin-binding protein - Homo sapiens (Human)</i></b>               |               |                  |                          |              |                      |
| Q9HB71                                                                       | 2             | 3.0989           | R.VRDALTAEK.S            | 1            | CYBP_HUMAN           |
| <b><i>Caldesmon - Homo sapiens (Human)</i></b>                               |               |                  |                          |              |                      |
| Q05682                                                                       | 2             | 3.7034           | K.PAASDLPVPAEGVR.N       | 1            | CALD1_HUMAN          |
| Q05682                                                                       | 2             | 4.5547           | K.RGSIGENQVEVMVEEK.T     | 2            | CALD1_HUMAN          |
| Q05682                                                                       | 2             | 3.4788           | K.QQEAALELEELKK.K        | 3            | CALD1_HUMAN          |
| Q05682                                                                       | 2             | 3.2626           | K.QQEAALELEELK.K         | 2            | CALD1_HUMAN          |
| Q05682                                                                       | 2             | 3.8088           | K.QKQQEAALELEELKK.K      | 3            | CALD1_HUMAN          |
| Q05682                                                                       | 2             | 3.4489           | K.TTESQEETVM#SLK.N       | 1            | CALD1_HUMAN          |
| Q05682                                                                       | 2             | 3.206            | K.PSDLRPGDVSSK.R         | 2            | CALD1_HUMAN          |
| Q05682                                                                       | 2             | 2.9788           | K.GSSSLKIEER.A           | 3            | CALD1_HUMAN          |
| Q05682                                                                       | 2             | 2.8942           | K.HTENTFSRPGGR.A         | 1            | CALD1_HUMAN          |
| Q05682                                                                       | 3             | 4.5483           | K.IDSRLEQY TSAIEGTK.S    | 4            | CALD1_HUMAN          |
| Q05682                                                                       | 2             | 2.9474           | K.LQEDKPTFK.K            | 1            | CALD1_HUMAN          |
| Q05682                                                                       | 2             | 4.0801           | R.QERYEIEETETVTK.S       | 7            | CALD1_HUMAN          |
| Q05682                                                                       | 2             | 5.1205           | K.SAKPTKPAASDLPVPAEGVR.N | 8            | CALD1_HUMAN          |
| Q05682                                                                       | 2             | 3.3329           | R.GETESEFEK.L            | 2            | CALD1_HUMAN          |
| Q05682                                                                       | 2             | 3.7387           | R.GETESEFEK.LK.Q         | 4            | CALD1_HUMAN          |
| Q05682                                                                       | 2             | 3.7184           | K.EKEEEEEKPK.R           | 3            | CALD1_HUMAN          |
| Q05682                                                                       | 3             | 4.44             | R.M#QNDAENETTEKEEK.S     | 10           | CALD1_HUMAN          |
| Q05682                                                                       | 2             | 3.6403           | R.M#QNDAENETTEK.E        | 2            | CALD1_HUMAN          |
| Q05682                                                                       | 2             | 2.7684           | R.LKEEIER.R              | 5            | CALD1_HUMAN          |
| Q05682                                                                       | 1             | 4.3743           | R.LEQY TSAIEGTK.S        | 7            | CALD1_HUMAN          |
| Q05682                                                                       | 2             | 3.4981           | R.KVLEEEEQRR.K           | 2            | CALD1_HUMAN          |
| Q05682                                                                       | 2             | 3.3725           | R.KVLEEEEQR.R            | 2            | CALD1_HUMAN          |
| Q05682                                                                       | 2             | 3.1184           | K.MPEDGLSDDK.K           | 1            | CALD1_HUMAN          |
| Q05682                                                                       | 2             | 3.5748           | K.M#PEDGLSDDKPKFK.C      | 2            | CALD1_HUMAN          |
| Q05682                                                                       | 3             | 4.8514           | R.MQNDAENETTEKEEKSES.R   | 3            | CALD1_HUMAN          |

| <i>Accession No*</i> | <i>Charge</i> | <i>XC(Max)**</i> | <i>Peptide*</i>         | <i>TC***</i> | <i>Reference No*</i> |
|----------------------|---------------|------------------|-------------------------|--------------|----------------------|
| Q05682               | 2             | 2.8441           | K.DKEPKKEEVK.S          | 5            | CALD1_HUMAN          |
| Q05682               | 2             | 3.3155           | R.YEIEETETVTK.S         | 15           | CALD1_HUMAN          |
| Q05682               | 2             | 3.1772           | R.RRGETESEEFK.L         | 3            | CALD1_HUMAN          |
| Q05682               | 2             | 6.4546           | R.RMQNDAENETTEKEEK.S    | 6            | CALD1_HUMAN          |
| Q05682               | 3             | 5.621            | R.RM#QNDAENETTEKEEK.S   | 4            | CALD1_HUMAN          |
| Q05682               | 3             | 5.0575           | R.RGETESEEFK.LK.Q       | 5            | CALD1_HUMAN          |
| Q05682               | 2             | 4.1138           | K.QKQQEAALLEELK.K       | 3            | CALD1_HUMAN          |
| Q05682               | 2             | 4.7992           | R.MQNDAENETTEKEEK.S     | 10           | CALD1_HUMAN          |
| Q05682               | 2             | 4.1216           | R.IAYQRNDDDEEAAR.E      | 2            | CALD1_HUMAN          |
| Q05682               | 3             | 4.6082           | R.M#QNDAENETTEKEEKSES.R | 4            | CALD1_HUMAN          |
| Q05682               | 2             | 3.5448           | K.SPAPKPSDLRPGDVSSK.R   | 6            | CALD1_HUMAN          |
| Q05682               | 2             | 3.6314           | R.RGETESEEFK.L          | 10           | CALD1_HUMAN          |
| Q05682               | 3             | 3.7471           | K.LKHTENTFSR.P          | 1            | CALD1_HUMAN          |
| Q05682               | 3             | 4.9597           | R.ASVDTKEAEGAPQVEAGK.R  | 2            | CALD1_HUMAN          |
| Q05682               | 2             | 5.4406           | R.ASVDTKEAEGAPQVEAGK.R  | 7            | CALD1_HUMAN          |
| Q05682               | 1             | 3.4042           | K.VLEEEQR.R             | 10           | CALD1_HUMAN          |
| Q05682               | 2             | 2.8714           | K.VEQKIEGK.W            | 2            | CALD1_HUMAN          |
| Q05682               | 2             | 4.031            | K.TTESQEETVMSLK.N       | 7            | CALD1_HUMAN          |
| Q05682               | 2             | 2.748            | K.SQNGEFMTHK.L          | 1            | CALD1_HUMAN          |
| Q05682               | 2             | 3.2458           | K.STHQAAIVSK.I          | 4            | CALD1_HUMAN          |
| Q05682               | 2             | 4.2917           | K.MPEDGLSDDKKPFK.C      | 7            | CALD1_HUMAN          |
| Q05682               | 2             | 4.6568           | R.MQNDAENETTEK.E        | 4            | CALD1_HUMAN          |
| Q05682               | 2             | 3.3234           | K.EAEGAPQVEAGK.R        | 8            | CALD1_HUMAN          |

***Calmin - Homo sapiens (Human)***

|        |   |        |                                    |   |            |
|--------|---|--------|------------------------------------|---|------------|
| Q96JQ2 | 3 | 5.2165 | K.ENDPMDSHQSQESPENLENIANPLEENVTK.E | 3 | CLMN_HUMAN |
| Q96JQ2 | 2 | 3.2057 | R.NAADLDDRR.N                      | 2 | CLMN_HUMAN |
| Q96JQ2 | 3 | 4.6689 | K.ESLRQDGHVLAVEVAEEK.E             | 2 | CLMN_HUMAN |
| Q96JQ2 | 4 | 5.0119 | K.ESLRQDGHVLAVEVAEEKEQK.Q          | 2 | CLMN_HUMAN |
| Q96JQ2 | 2 | 4.4895 | K.FNSDLIDFASTSQAFNK.V              | 4 | CLMN_HUMAN |
| Q96JQ2 | 2 | 2.7845 | K.KKDSPEPQVK.M                     | 1 | CLMN_HUMAN |
| Q96JQ2 | 2 | 3.424  | R.SSESDHFSYVQLR.N                  | 1 | CLMN_HUMAN |
| Q96JQ2 | 2 | 4.8495 | K.TSDISEPSPSSILSSR.K               | 3 | CLMN_HUMAN |
| Q96JQ2 | 2 | 3.9302 | R.GGVGTTPASEPAPLAPHEDHQQR.E        | 2 | CLMN_HUMAN |
| Q96JQ2 | 2 | 3.3651 | R.IKETPSEQESK.V                    | 2 | CLMN_HUMAN |

***Calmodulin - Homo sapiens (Human)***

|        |   |        |                             |    |            |
|--------|---|--------|-----------------------------|----|------------|
| P62158 | 3 | 5.7688 | R.EADIDGDGQVNYEEFVQMM#TAK.- | 25 | CALM_HUMAN |
|--------|---|--------|-----------------------------|----|------------|

| <i>Accession No*</i>                                                                     | <i>Charge</i> | <i>XC(Max)**</i> | <i>Peptide*</i>                 | <i>TC***</i> | <i>Reference No*</i> |
|------------------------------------------------------------------------------------------|---------------|------------------|---------------------------------|--------------|----------------------|
| P62158                                                                                   | 2             | 5.6098           | R.EADIDGDGQVNYEEFVQMMTAK.-      | 25           | CALM_HUMAN           |
| P62158                                                                                   | 3             | 5.3492           | R.EADIDGDGQVNYEEFVQM#M#TAK.-    | 7            | CALM_HUMAN           |
| <b><i>Calmodulin-like protein 3 - Homo sapiens (Human)</i></b>                           |               |                  |                                 |              |                      |
| P27482                                                                                   | 2             | 3.8327           | K.DGNQFVSAELR.H                 | 4            | CALL3_HUMAN          |
| P27482                                                                                   | 2             | 4.6297           | R.AADTDGDGQVNYEEFVR.V           | 23           | CALL3_HUMAN          |
| P27482                                                                                   | 2             | 4.0859           | R.SLGQNPTEAELR.D                | 8            | CALL3_HUMAN          |
| P27482                                                                                   | 3             | 4.5636           | R.LGEKLSDEEVDEMIR.A             | 1            | CALL3_HUMAN          |
| P27482                                                                                   | 2             | 4.029            | K.MKDTDNEEEIR.E                 | 5            | CALL3_HUMAN          |
| P27482                                                                                   | 3             | 5.3934           | R.VFDKDGNGFVSAELR.H             | 12           | CALL3_HUMAN          |
| P27482                                                                                   | 2             | 4.4765           | R.KMKDTDNEEEIR.E                | 1            | CALL3_HUMAN          |
| P27482                                                                                   | 3             | 5.1991           | R.DMMSEIDRDGNGTVDFPEFLGM#M#AR.K | 3            | CALL3_HUMAN          |
| P27482                                                                                   | 2             | 4.0265           | K.LSDEEVDEMIR.A                 | 22           | CALL3_HUMAN          |
| P27482                                                                                   | 2             | 3.2737           | K.MKDTDNEEEIREAFR.V             | 2            | CALL3_HUMAN          |
| P27482                                                                                   | 2             | 3.0405           | K.LSDEEVDEM#IR.A                | 5            | CALL3_HUMAN          |
| <b><i>Calmodulin-regulated spectrin-associated protein 1. - Homo sapiens (Human)</i></b> |               |                  |                                 |              |                      |
| Q5T5Y3                                                                                   | 2             | 3.4315           | R.ADVVPQQADPEFPR.A              | 2            | Q5T5Y3_HUMAN         |
| Q5T5Y3                                                                                   | 3             | 4.3488           | R.HYLHPPEPEYLKG.G               | 1            | Q5T5Y3_HUMAN         |
| <b><i>Calnexin precursor - Homo sapiens (Human)</i></b>                                  |               |                  |                                 |              |                      |
| P27824                                                                                   | 2             | 3.0402           | K.AEEDAILNR.S                   | 1            | CALX_HUMAN           |
| P27824                                                                                   | 2             | 2.8217           | K.IPNPDFFEDLEPFR.M              | 1            | CALX_HUMAN           |
| P27824                                                                                   | 3             | 4.0087           | R.KIPNPDFFEDLEPFR.M             | 2            | CALX_HUMAN           |
| P27824                                                                                   | 3             | 3.9719           | K.YDGKWEVEEMKESK.L              | 1            | CALX_HUMAN           |
| <b><i>Calpain small subunit 1 - Homo sapiens (Human)</i></b>                             |               |                  |                                 |              |                      |
| P04632                                                                                   | 3             | 5.1968           | R.ILGGVISAISEAAAQYNPEPPPPR.T    | 1            | CPNS1_HUMAN          |
| <b><i>Calpastatin - Homo sapiens (Human)</i></b>                                         |               |                  |                                 |              |                      |
| P20810                                                                                   | 2             | 3.0459           | K.AIPVSQQMEGPHLPNK.K            | 3            | ICAL_HUMAN           |
| <b><i>Calponin-1 - Homo sapiens (Human)</i></b>                                          |               |                  |                                 |              |                      |
| P51911                                                                                   | 2             | 4.3607           | K.FASQQGMTAYGTR.R               | 5            | CNN1_HUMAN           |
| P51911                                                                                   | 2             | 3.6512           | K.FASQQGM#TAYGTR.R              | 1            | CNN1_HUMAN           |
| P51911                                                                                   | 2             | 4.4425           | K.GASQAGMTAPGTR.Q               | 2            | CNN1_HUMAN           |
| P51911                                                                                   | 2             | 4.0592           | K.GASQAGMTAPGTR.R               | 2            | CNN1_HUMAN           |
| P51911                                                                                   | 3             | 4.8611           | K.LGTDQPLDQATISLQM#GTNK.G       | 1            | CNN1_HUMAN           |
| P51911                                                                                   | 2             | 6.0882           | K.LGTDQPLDQATISLQMGTNK.G        | 3            | CNN1_HUMAN           |
| P51911                                                                                   | 2             | 3.2715           | K.GASQAGM#TAPGTR.Q              | 2            | CNN1_HUMAN           |

Accession No\* Charge XC(Max)\*\* Peptide\* TC\*\*\* Reference No\*

**Calponin-2 - Homo sapiens (Human)**

|        |   |        |                       |   |            |
|--------|---|--------|-----------------------|---|------------|
| Q99439 | 3 | 5.1772 | R.SM#QNWHQLENLSNFIK.A | 3 | CNN2_HUMAN |
| Q99439 | 1 | 2.3164 | R.NFDDATMK.A          | 1 | CNN2_HUMAN |
| Q99439 | 3 | 4.4718 | R.SMQNWHQLENLSNFIK.A  | 1 | CNN2_HUMAN |

**Calponin-3 - Homo sapiens (Human)**

|        |   |        |                          |   |            |
|--------|---|--------|--------------------------|---|------------|
| Q15417 | 1 | 3.7217 | K.GASQAGMLAPGTR.R        | 3 | CNN3_HUMAN |
| Q15417 | 2 | 3.2315 | R.DYQYSDQGIDY.-          | 1 | CNN3_HUMAN |
| Q15417 | 2 | 5.8773 | K.LTLQPVDNSTISLQMGTNK.V  | 7 | CNN3_HUMAN |
| Q15417 | 2 | 3.3803 | K.GASQAGM#LAPGTR.R       | 2 | CNN3_HUMAN |
| Q15417 | 1 | 2.1647 | R.DIYDQK.L               | 2 | CNN3_HUMAN |
| Q15417 | 2 | 3.4632 | K.GM#SVYGLGR.Q           | 2 | CNN3_HUMAN |
| Q15417 | 3 | 4.8148 | K.LTLQPVDNSTISLQM#GTNK.V | 3 | CNN3_HUMAN |
| Q15417 | 1 | 3.38   | K.GMSVYGLGR.Q            | 3 | CNN3_HUMAN |
| Q15417 | 3 | 4.6962 | K.MQTDKPFQTTISLQM#GTNK.G | 3 | CNN3_HUMAN |

**Calreticulin precursor - Homo sapiens (Human)**

|        |   |        |                                    |    |            |
|--------|---|--------|------------------------------------|----|------------|
| P27797 | 1 | 2.3155 | K.FVLSSGK.F                        | 3  | CALR_HUMAN |
| P27797 | 2 | 3.4338 | K.DKGLQTSQDAR.F                    | 2  | CALR_HUMAN |
| P27797 | 2 | 5.7433 | K.FYGDEEKDKGLQTSQDAR.F             | 10 | CALR_HUMAN |
| P27797 | 2 | 3.1952 | K.GKNVLINK.D                       | 4  | CALR_HUMAN |
| P27797 | 2 | 4.1586 | R.FYALSASFEPFSNK.G                 | 3  | CALR_HUMAN |
| P27797 | 3 | 4.2834 | K.IDNSQVESGSLEDDWDFLPPK.I          | 5  | CALR_HUMAN |
| P27797 | 3 | 6.3031 | K.GTWHIPEIDNPEYSPDPSIYADNFGVLGLDLW | 1  | CALR_HUMAN |
| P27797 | 1 | 2.2494 | K.NVLINK.D                         | 1  | CALR_HUMAN |
| P27797 | 2 | 4.3114 | K.IDNSQVESGSLEDDWDFLPPK.K          | 7  | CALR_HUMAN |
| P27797 | 1 | 2.9771 | K.FYGDEEKDK.G                      | 2  | CALR_HUMAN |
| P27797 | 2 | 3.0007 | K.KVHVIFNYK.G                      | 2  | CALR_HUMAN |
| P27797 | 2 | 4.7245 | K.IKDPDASKPEDWDER.A                | 9  | CALR_HUMAN |
| P27797 | 2 | 4.7186 | K.HEQNIDCGGGYVK.L                  | 3  | CALR_HUMAN |
| P27797 | 2 | 3.463  | K.GQTLVVQFTVK.H                    | 4  | CALR_HUMAN |

**CALRETICULIN=CALCIUM binding protein - Homo sapiens (Human)**

|        |   |       |                         |   |              |
|--------|---|-------|-------------------------|---|--------------|
| Q9UDG2 | 2 | 4.344 | -.EPAVYFKEQFLDGDGWTSR.W | 3 | Q9UDG2_HUMAN |
|--------|---|-------|-------------------------|---|--------------|

**Calumenin precursor - Homo sapiens (Human)**

|        |   |        |                |   |            |
|--------|---|--------|----------------|---|------------|
| O43852 | 1 | 3.1967 | R.WIYEDVER.Q   | 4 | CALU_HUMAN |
| O43852 | 2 | 3.1487 | R.HLVYESDQNK.D | 4 | CALU_HUMAN |

| <i>Accession No*</i>                                                                                 | <i>Charge</i> | <i>XC(Max)**</i> | <i>Peptide*</i>                   | <i>TC***</i> | <i>Reference No*</i> |
|------------------------------------------------------------------------------------------------------|---------------|------------------|-----------------------------------|--------------|----------------------|
| O43852                                                                                               | 2             | 4.3435           | K.TFDQLTPEESKER.L                 | 8            | CALU_HUMAN           |
| O43852                                                                                               | 2             | 3.5901           | K.TFDQLTPEESK.E                   | 3            | CALU_HUMAN           |
| O43852                                                                                               | 2             | 2.8549           | K.RWIYEDVER.Q                     | 2            | CALU_HUMAN           |
| O43852                                                                                               | 3             | 5.9682           | K.MDKEETKDWILPSDYDHAEAEAR.H       | 3            | CALU_HUMAN           |
| O43852                                                                                               | 2             | 4.5007           | R.HLVYESDQNKDGK.L                 | 4            | CALU_HUMAN           |
| O43852                                                                                               | 3             | 5.7423           | K.VHNDQAQSFYDHDHDAFLGAEAAK.T      | 4            | CALU_HUMAN           |
| O43852                                                                                               | 3             | 5.0665           | K.IDGDKDGFVTVDELKDWIK.F           | 1            | CALU_HUMAN           |
| O43852                                                                                               | 2             | 4.6422           | K.MADKDGDLIATK.E                  | 4            | CALU_HUMAN           |
| O43852                                                                                               | 2             | 4.5817           | K.M#ADKDGDLIATK.E                 | 3            | CALU_HUMAN           |
| <b><i>cAMP-dependent protein kinase inhibitor alpha - Homo sapiens (Human)</i></b>                   |               |                  |                                   |              |                      |
| P61925                                                                                               | 2             | 3.7871           | R.SSTEQSGEAQGEAAKSES.-            | 2            | IPKA_HUMAN           |
| P61925                                                                                               | 2             | 4.5872           | R.SSTEQSGEAQGEAAK.S               | 3            | IPKA_HUMAN           |
| <b><i>cAMP-dependent protein kinase inhibitor gamma - Homo sapiens (Human)</i></b>                   |               |                  |                                   |              |                      |
| Q9Y2B9                                                                                               | 3             | 6.8699           | R.KLAGDMGELALEGAEGQVEGSAPDKEAGNQP | 2            | IPKG_HUMAN           |
| Q9Y2B9                                                                                               | 3             | 6.5212           | K.LAGDM#GELALEGAEGQVEGSAPDKEAGNQP | 1            | IPKG_HUMAN           |
| <b><i>cAMP-dependent protein kinase type II-beta regulatory subunit - Homo sapiens (Human)</i></b>   |               |                  |                                   |              |                      |
| P31323                                                                                               | 3             | 4.2872           | R.HQPADLLEFALQHFR.L               | 1            | KAP3_HUMAN           |
| <b><i>cAMP-regulated phosphoprotein 19 - Homo sapiens (Human)</i></b>                                |               |                  |                                   |              |                      |
| P56211                                                                                               | 2             | 2.972            | K.PGGSDFLR.K                      | 1            | ARP19_HUMAN          |
| <b><i>CAP-Gly domain-containing linker protein 2 - Homo sapiens (Human)</i></b>                      |               |                  |                                   |              |                      |
| Q9UDT6                                                                                               | 2             | 4.2436           | R.TSTGSASSSAVAASSK.E              | 2            | CLIP2_HUMAN          |
| Q9UDT6                                                                                               | 2             | 3.4535           | K.LQEAQEELAGLQR.H                 | 2            | CLIP2_HUMAN          |
| Q9UDT6                                                                                               | 3             | 4.1157           | K.HDLETAMHVK.E                    | 1            | CLIP2_HUMAN          |
| Q9UDT6                                                                                               | 2             | 3.1696           | K.ATLNSGPGAQQK.E                  | 2            | CLIP2_HUMAN          |
| <b><i>Carbamoyl-phosphate synthase [ammonia], mitochondrial precursor - Homo sapiens (Human)</i></b> |               |                  |                                   |              |                      |
| P31327                                                                                               | 2             | 3.1791           | R.SIFSAVLDELK.V                   | 1            | CPSM_HUMAN           |
| <b><i>Carbonic anhydrase 1 - Homo sapiens (Human)</i></b>                                            |               |                  |                                   |              |                      |
| P00915                                                                                               | 2             | 4.1838           | K.ADGLAVIGVLMK.V                  | 2            | CAH1_HUMAN           |
| P00915                                                                                               | 4             | 4.9665           | K.TSETKHDTSLKPISVSYNPATAK.E       | 1            | CAH1_HUMAN           |
| P00915                                                                                               | 2             | 4.1953           | K.LYPIANGNNQSPVDIK.T              | 5            | CAH1_HUMAN           |
| P00915                                                                                               | 3             | 5.8654           | K.HDTSLKPISVSYNPATAK.E            | 2            | CAH1_HUMAN           |
| <b><i>Carbonic anhydrase 12 precursor - Homo sapiens (Human)</i></b>                                 |               |                  |                                   |              |                      |
| O43570                                                                                               | 2             | 4.1442           | K.WTYFGPDGENSWSK.K                | 6            | CAH12_HUMAN          |

| <i>Accession No*</i>                                                 | <i>Charge</i> | <i>XC(Max)**</i> | <i>Peptide*</i>                    | <i>TC***</i> | <i>Reference No*</i> |
|----------------------------------------------------------------------|---------------|------------------|------------------------------------|--------------|----------------------|
| O43570                                                               | 3             | 4.3583           | K.YKGQEA FVPGFNIEELLPER.T          | 3            | CAH12_HUMAN          |
| <b><i>Carbonic anhydrase 2 - Homo sapiens (Human)</i></b>            |               |                  |                                    |              |                      |
| P00918                                                               | 2             | 3.3174           | K.VVDVLD SIK.T                     | 2            | CAH2_HUMAN           |
| P00918                                                               | 2             | 5.171            | K.YDPSLKPLSVSYDQATSLR.I            | 3            | CAH2_HUMAN           |
| <b><i>Carbonyl reductase [NADPH] 1 - Homo sapiens (Human)</i></b>    |               |                  |                                    |              |                      |
| P16152                                                               | 3             | 5.1871           | K.SPEEGAETPVYLALLPPDAEGPHGQFVSEK.R | 2            | CBR1_HUMAN           |
| P16152                                                               | 2             | 2.898            | R.SETITEEELVGLMNK.F                | 1            | CBR1_HUMAN           |
| P16152                                                               | 2             | 3.5493           | R.VVNVSSIMSVR.A                    | 2            | CBR1_HUMAN           |
| <b><i>Carboxylesterase 2 precursor - Homo sapiens (Human)</i></b>    |               |                  |                                    |              |                      |
| O00748                                                               | 2             | 3.1682           | K.MIPGVVDGVFLPR.H                  | 2            | EST2_HUMAN           |
| O00748                                                               | 2             | 3.1995           | K.EMDREASQAALQK.M                  | 2            | EST2_HUMAN           |
| O00748                                                               | 3             | 5.3934           | R.TTHTGQVLGSLVHVK.G                | 3            | EST2_HUMAN           |
| O00748                                                               | 3             | 3.9739           | K.SKEEILAINKPFK.M                  | 2            | EST2_HUMAN           |
| <b><i>Casein kinase I isoform epsilon - Homo sapiens (Human)</i></b> |               |                  |                                    |              |                      |
| P49674                                                               | 3             | 4.2624           | R.IPASQTSV PFDHLGK.-               | 2            | KC1E_HUMAN           |
| <b><i>Caskin-2 - Homo sapiens (Human)</i></b>                        |               |                  |                                    |              |                      |
| Q8WXE0                                                               | 3             | 5.5578           | R.GSGHSQEQPAPQPSGGDPSPPQER.N       | 2            | CSKI2_HUMAN          |
| Q8WXE0                                                               | 2             | 4.2822           | R.WNGETEP PAAPAALLK.V              | 2            | CSKI2_HUMAN          |
| Q8WXE0                                                               | 2             | 3.7816           | R.GSSGEGLPFAEEGNLTIK.Q             | 2            | CSKI2_HUMAN          |
| Q8WXE0                                                               | 2             | 3.7162           | R.LSSVSGSPPEPPPLDGSPGPK.E          | 1            | CSKI2_HUMAN          |
| Q8WXE0                                                               | 3             | 4.4264           | R.LGPRPVPPRPESTGT VGPQAQR.L        | 1            | CSKI2_HUMAN          |
| Q8WXE0                                                               | 2             | 3.0769           | R.SPSQESIGAR.S                     | 1            | CSKI2_HUMAN          |
| <b><i>CASP8-associated protein 2 - Homo sapiens (Human)</i></b>      |               |                  |                                    |              |                      |
| Q9UKL3                                                               | 1             | 2.2468           | K.QTINNGR.A                        | 1            | C8AP2_HUMAN          |
| <b><i>Catalase - Homo sapiens (Human)</i></b>                        |               |                  |                                    |              |                      |
| P04040                                                               | 3             | 5.5497           | K.ADVLT TGAGNPVGD KLN VITVGPR.G    | 5            | CATA_HUMAN           |
| P04040                                                               | 2             | 3.0762           | K.LNVITVGPR.G                      | 1            | CATA_HUMAN           |
| P04040                                                               | 3             | 4.1322           | K.NAIHTFVQSGSHLAAR.E               | 1            | CATA_HUMAN           |
| P04040                                                               | 2             | 4.549            | R.AFYVNV LNEEQR.K                  | 4            | CATA_HUMAN           |
| P04040                                                               | 2             | 2.9193           | R.DPASDQM#QH WK.E                  | 1            | CATA_HUMAN           |
| P04040                                                               | 2             | 3.3529           | R.DPASDQM QHWK.E                   | 1            | CATA_HUMAN           |
| P04040                                                               | 2             | 4.3566           | K.ADVLT TGAGNPVGD K.L              | 2            | CATA_HUMAN           |
| <b><i>Catenin alpha-1 - Homo sapiens (Human)</i></b>                 |               |                  |                                    |              |                      |

| <i>Accession No*</i>                                                                           | <i>Charge</i> | <i>XC(Max)**</i> | <i>Peptide*</i>                    | <i>TC***</i> | <i>Reference No*</i> |
|------------------------------------------------------------------------------------------------|---------------|------------------|------------------------------------|--------------|----------------------|
| P35221                                                                                         | 2             | 3.5886           | R.QALQDLLSEYMGNAGR.K               | 1            | CTNA1_HUMAN          |
| P35221                                                                                         | 3             | 4.1767           | R.VIHVVVTSEMDNYEPGVYTEK.V          | 1            | CTNA1_HUMAN          |
| P35221                                                                                         | 2             | 3.4389           | K.SQGMASLNLPVAVSWK.M               | 1            | CTNA1_HUMAN          |
| P35221                                                                                         | 2             | 3.7888           | K.HVNPVQALSEFK.A                   | 4            | CTNA1_HUMAN          |
| <b><i>Catenin beta-1 - Homo sapiens (Human)</i></b>                                            |               |                  |                                    |              |                      |
| P35222                                                                                         | 3             | 5.2981           | K.AAVSHWQQQSYLDSGIHSGATTTAPSLSGK.G | 2            | CTNB1_HUMAN          |
| P35222                                                                                         | 2             | 3.5938           | K.LLNDEDQVVVVK.A                   | 2            | CTNB1_HUMAN          |
| <b><i>Cathepsin B precursor - Homo sapiens (Human)</i></b>                                     |               |                  |                                    |              |                      |
| P07858                                                                                         | 2             | 3.4936           | K.NGPVEGAFSVYSDFLLYK.S             | 1            | CATB_HUMAN           |
| P07858                                                                                         | 3             | 4.361            | K.SGVYQHVTGEMM#GGHAIR.I            | 1            | CATB_HUMAN           |
| P07858                                                                                         | 3             | 4.8379           | K.SGVYQHVTGEM#MGGHAIR.I            | 2            | CATB_HUMAN           |
| P07858                                                                                         | 3             | 5.1839           | K.SGVYQHVTGEMMGGHAIR.I             | 2            | CATB_HUMAN           |
| <b><i>Cathepsin D precursor - Homo sapiens (Human)</i></b>                                     |               |                  |                                    |              |                      |
| P07339                                                                                         | 2             | 2.7633           | R.VGFAEAARL.-                      | 1            | CATD_HUMAN           |
| P07339                                                                                         | 2             | 3.6428           | K.FDGILGMAYPR.I                    | 2            | CATD_HUMAN           |
| P07339                                                                                         | 2             | 4.7611           | R.DPDAQPGGELM#LGGTDSK.Y            | 5            | CATD_HUMAN           |
| P07339                                                                                         | 2             | 3.671            | K.LVDQNIFSFYLSR.D                  | 1            | CATD_HUMAN           |
| <b><i>Cathepsin H precursor - Homo sapiens (Human)</i></b>                                     |               |                  |                                    |              |                      |
| P09668                                                                                         | 3             | 4.0594           | K.MLSLAEQQLVDCAQDFNNHGCQGGGLPSQAFE | 1            | CATH_HUMAN           |
| <b><i>Cathepsin L precursor - Homo sapiens (Human)</i></b>                                     |               |                  |                                    |              |                      |
| P07711                                                                                         | 2             | 3.919            | K.AVATVGPISVAIDAGHESFLFYK.E        | 1            | CATL_HUMAN           |
| P07711                                                                                         | 2             | 3.07             | K.NSWGEEWGM#GGYVK.M                | 1            | CATL_HUMAN           |
| <b><i>Cathepsin Z precursor - Homo sapiens (Human)</i></b>                                     |               |                  |                                    |              |                      |
| Q9UBR2                                                                                         | 2             | 3.0478           | R.IVTSTYKDGK.G                     | 1            | CATZ_HUMAN           |
| <b><i>Cation-dependent mannose-6-phosphate receptor precursor - Homo sapiens (Human)</i></b>   |               |                  |                                    |              |                      |
| P20645                                                                                         | 2             | 3.8843           | R.HTLADNFPVSEER.G                  | 2            | MPRD_HUMAN           |
| P20645                                                                                         | 2             | 3.4877           | K.SFESTVGGSDTYIYIFR.V              | 2            | MPRD_HUMAN           |
| <b><i>Cation-independent mannose-6-phosphate receptor precursor - Homo sapiens (Human)</i></b> |               |                  |                                    |              |                      |
| P11717                                                                                         | 2             | 3.5862           | R.NAQSNALQER.E                     | 5            | MPRI_HUMAN           |
| P11717                                                                                         | 2             | 3.6031           | R.GAGAESSHPVR.N                    | 5            | MPRI_HUMAN           |
| <b><i>CCAAT/enhancer-binding protein zeta - Homo sapiens (Human)</i></b>                       |               |                  |                                    |              |                      |
| Q03701                                                                                         | 3             | 4.7605           | K.KGAIDDLQQGELEAFIQNLNLAK.Y        | 1            | CEBPZ_HUMAN          |

| <i>Accession No*</i>                                                                | <i>Charge</i> | <i>XC(Max)**</i> | <i>Peptide*</i>        | <i>TC***</i> | <i>Reference No*</i> |
|-------------------------------------------------------------------------------------|---------------|------------------|------------------------|--------------|----------------------|
| <b><i>CCDC43 protein - Homo sapiens (Human)</i></b>                                 |               |                  |                        |              |                      |
| Q86WV7                                                                              | 2             | 3.3454           | R.NTNVEDVLNAR.K        | 2            | Q86WV7_HUMAN         |
| <b><i>CD166 antigen precursor - Homo sapiens (Human)</i></b>                        |               |                  |                        |              |                      |
| Q13740                                                                              | 3             | 4.7829           | K.EMDPVTQLYMTSTLEYK.T  | 1            | CD166_HUMAN          |
| <b><i>CD2 antigen cytoplasmic tail-binding protein 2 - Homo sapiens (Human)</i></b> |               |                  |                        |              |                      |
| O95400                                                                              | 2             | 3.1349           | R.KGPGQPSSPQR.L        | 2            | CD2B2_HUMAN          |
| O95400                                                                              | 2             | 3.7808           | R.DSWLDNIDWVK.I        | 3            | CD2B2_HUMAN          |
| O95400                                                                              | 2             | 3.8806           | R.GNLGVYQETR.E         | 3            | CD2B2_HUMAN          |
| O95400                                                                              | 2             | 3.9845           | R.LSGLADQMVAR.G        | 2            | CD2B2_HUMAN          |
| <b><i>CD2-associated protein - Homo sapiens (Human)</i></b>                         |               |                  |                        |              |                      |
| Q9Y5K6                                                                              | 2             | 2.7026           | K.AKVETDDVK.K          | 1            | CD2AP_HUMAN          |
| Q9Y5K6                                                                              | 2             | 2.9167           | K.LGLFPSNFVK.E         | 3            | CD2AP_HUMAN          |
| Q9Y5K6                                                                              | 2             | 3.4405           | K.VLFEYIPQNEDELELK.V   | 1            | CD2AP_HUMAN          |
| Q9Y5K6                                                                              | 1             | 2.4868           | K.FETEPVSK.L           | 2            | CD2AP_HUMAN          |
| Q9Y5K6                                                                              | 2             | 4.1894           | K.LKLDSEQLPLRPK.S      | 1            | CD2AP_HUMAN          |
| Q9Y5K6                                                                              | 2             | 3.1921           | K.EEDSANLKPSELKK.D     | 2            | CD2AP_HUMAN          |
| Q9Y5K6                                                                              | 1             | 2.3153           | K.DLEEEK.T             | 5            | CD2AP_HUMAN          |
| Q9Y5K6                                                                              | 2             | 3.667            | K.APAPKPELIAAEK.K      | 4            | CD2AP_HUMAN          |
| Q9Y5K6                                                                              | 3             | 3.7299           | K.LPKEEDSANLKPSELK.K   | 2            | CD2AP_HUMAN          |
| Q9Y5K6                                                                              | 3             | 3.9577           | K.AKVETDDVKK.N         | 5            | CD2AP_HUMAN          |
| Q9Y5K6                                                                              | 2             | 3.4461           | R.HGNVASLVQR.I         | 4            | CD2AP_HUMAN          |
| Q9Y5K6                                                                              | 3             | 5.2693           | K.STLEQKPSKPAAPQVPPK.K | 11           | CD2AP_HUMAN          |
| Q9Y5K6                                                                              | 2             | 3.1658           | K.LDSEQLPLRPK.S        | 2            | CD2AP_HUMAN          |
| Q9Y5K6                                                                              | 2             | 3.1651           | R.ETEFKDDSLPIKR.E      | 2            | CD2AP_HUMAN          |
| Q9Y5K6                                                                              | 2             | 3.0308           | R.GIGFGDIFK.E          | 1            | CD2AP_HUMAN          |
| Q9Y5K6                                                                              | 2             | 3.8436           | R.ISTYGLPAGGIQPHPQTK.N | 4            | CD2AP_HUMAN          |
| Q9Y5K6                                                                              | 1             | 2.1625           | R.SSGTVYPK.R           | 3            | CD2AP_HUMAN          |
| Q9Y5K6                                                                              | 2             | 2.9082           | R.ETEFKDDSLPIK.R       | 1            | CD2AP_HUMAN          |
| Q9Y5K6                                                                              | 2             | 3.9584           | K.ANTTAFLTPLEIK.A      | 5            | CD2AP_HUMAN          |
| Q9Y5K6                                                                              | 2             | 2.9702           | K.SVDFDSLTVR.T         | 1            | CD2AP_HUMAN          |
| Q9Y5K6                                                                              | 1             | 3.0358           | K.TQSVEITK.T           | 4            | CD2AP_HUMAN          |
| Q9Y5K6                                                                              | 2             | 4.4316           | K.TQSVEITKTDTEGK.I     | 5            | CD2AP_HUMAN          |
| Q9Y5K6                                                                              | 2             | 2.9385           | K.EGEIHLISK.E          | 1            | CD2AP_HUMAN          |
| Q9Y5K6                                                                              | 2             | 4.3702           | K.LQEEGWLEGELNGR.R     | 2            | CD2AP_HUMAN          |
| Q9Y5K6                                                                              | 1             | 2.9368           | R.SNLEMEIEK.L          | 3            | CD2AP_HUMAN          |



| <i>Accession No*</i>                                                 | <i>Charge</i> | <i>XC(Max)**</i> | <i>Peptide*</i>                    | <i>TC***</i> | <i>Reference No*</i> |
|----------------------------------------------------------------------|---------------|------------------|------------------------------------|--------------|----------------------|
| Q9Y5K6                                                               | 1             | 2.1024           | K.NSLDEL.R.A                       | 1            | CD2AP_HUMAN          |
| <b><i>CD44 antigen precursor - Homo sapiens (Human)</i></b>          |               |                  |                                    |              |                      |
| P16070                                                               | 1             | 2.5769           | R.NLQNVDMK.I                       | 1            | CD44_HUMAN           |
| P16070                                                               | 2             | 2.8222           | K.ESSETPDQFM.TA.DETR.N             | 1            | CD44_HUMAN           |
| P16070                                                               | 2             | 3.7377           | K.ESSETPDQFM#T.A.DETR.N            | 2            | CD44_HUMAN           |
| <b><i>CD59 glycoprotein precursor - Homo sapiens (Human)</i></b>     |               |                  |                                    |              |                      |
| P13987                                                               | 2             | 3.7279           | K.AGLQVY.NK.C                      | 8            | CD59_HUMAN           |
| <b><i>CD9 antigen - Homo sapiens (Human)</i></b>                     |               |                  |                                    |              |                      |
| P21926                                                               | 2             | 3.0897           | K.KDVLETFTVK.S                     | 2            | CD9_HUMAN            |
| <b><i>CD97 antigen precursor - Homo sapiens (Human)</i></b>          |               |                  |                                    |              |                      |
| P48960                                                               | 2             | 2.8731           | K.KQAELEEIYESSIR.G                 | 1            | CD97_HUMAN           |
| P48960                                                               | 3             | 4.4632           | R.HLIATQLLSNLEDIM#R.I              | 1            | CD97_HUMAN           |
| P48960                                                               | 3             | 3.932            | R.HLIATQLLSNLEDIMR.I               | 1            | CD97_HUMAN           |
| <b><i>CD99 antigen precursor - Homo sapiens (Human)</i></b>          |               |                  |                                    |              |                      |
| P14209                                                               | 2             | 3.06             | R.NANAEP.VQR.T                     | 2            | CD99_HUMAN           |
| <b><i>Cdc42 effector protein 1 - Homo sapiens (Human)</i></b>        |               |                  |                                    |              |                      |
| Q00587                                                               | 2             | 2.7101           | R.MASPPAPSPAPPAISPIIK.N            | 1            | BORG5_HUMAN          |
| Q00587                                                               | 2             | 2.8315           | R.M#ASPPAPSPAPPAISPIIK.N           | 1            | BORG5_HUMAN          |
| <b><i>Cdc42 effector protein 4 - Homo sapiens (Human)</i></b>        |               |                  |                                    |              |                      |
| Q9H3Q1                                                               | 3             | 4.0577           | K.AGPDLP.SLPSHALEDEGWAAAAPSPGSAR.S | 1            | BORG4_HUMAN          |
| Q9H3Q1                                                               | 2             | 4.6744           | K.ANDGEGGDEEAGT.EEAVPR.R           | 5            | BORG4_HUMAN          |
| Q9H3Q1                                                               | 3             | 3.9767           | K.KANDGEGGDEEAGT.EEAVPR.R          | 2            | BORG4_HUMAN          |
| Q9H3Q1                                                               | 2             | 4.3023           | K.AGEPDGESLDEQPSSSSSK.R            | 6            | BORG4_HUMAN          |
| Q9H3Q1                                                               | 2             | 4.257            | R.AGDAFGDTSFLNSK.A                 | 2            | BORG4_HUMAN          |
| <b><i>Cdc42 GTPase-activating protein - Homo sapiens (Human)</i></b> |               |                  |                                    |              |                      |
| Q2M1Z3                                                               | 3             | 4.7714           | K.VFRPVEDPESEQTAPK.M               | 4            | Q2M1Z3_HUMAN         |
| Q2M1Z3                                                               | 2             | 5.7563           | R.DPANQSTQGASTAASR.E               | 2            | Q2M1Z3_HUMAN         |
| Q2M1Z3                                                               | 2             | 2.7199           | K.GPSGVQPNPAETSPISLAEGK.E          | 1            | Q2M1Z3_HUMAN         |
| <b><i>Cdc42-interacting protein 4 - Homo sapiens (Human)</i></b>     |               |                  |                                    |              |                      |
| Q15642                                                               | 2             | 2.9984           | K.RLQQQLEER.S                      | 2            | CIP4_HUMAN           |
| Q15642                                                               | 2             | 3.0986           | K.YEAWLAEAESR.V                    | 1            | CIP4_HUMAN           |
| Q15642                                                               | 3             | 4.4749           | R.HARPPDPPASAPPDSSSNSASQDTK.E      | 1            | CIP4_HUMAN           |
| Q15642                                                               | 2             | 2.8051           | K.EGGEGYVPTS.YLR.V                 | 1            | CIP4_HUMAN           |

| <i>Accession No*</i>                                                                                    | <i>Charge</i> | <i>XC(Max)**</i> | <i>Peptide*</i>             | <i>TC***</i> | <i>Reference No*</i> |
|---------------------------------------------------------------------------------------------------------|---------------|------------------|-----------------------------|--------------|----------------------|
| <b><i>CDNA FLJ20036 fis, clone COL00219 - Homo sapiens (Human)</i></b>                                  |               |                  |                             |              |                      |
| Q9NXV6                                                                                                  | 2             | 4.6727           | R.SSGISSQNSSTSDGDR.S        | 4            | Q9NXV6_HUMAN         |
| Q9NXV6                                                                                                  | 2             | 3.0653           | R.VAAWVEALR.C               | 1            | Q9NXV6_HUMAN         |
| Q9NXV6                                                                                                  | 2             | 3.7923           | K.STSQVAASLLASK.S           | 1            | Q9NXV6_HUMAN         |
| Q9NXV6                                                                                                  | 2             | 4.6805           | R.SVSSQSSSSVSSQVTTAGSGK.A   | 2            | Q9NXV6_HUMAN         |
| Q9NXV6                                                                                                  | 2             | 4.2388           | K.SSVNSHMTQSTDSR.Q          | 2            | Q9NXV6_HUMAN         |
| <b><i>CDNA FLJ23801 fis, clone HEP22544 - Homo sapiens (Human)</i></b>                                  |               |                  |                             |              |                      |
| Q8TE87                                                                                                  | 2             | 2.7273           | R.AVSPAASAALGLSGTLPR.L      | 1            | Q8TE87_HUMAN         |
| <b><i>CDNA FLJ26875 fis, clone PRS08969 - Homo sapiens (Human)</i></b>                                  |               |                  |                             |              |                      |
| Q6ZNY7                                                                                                  | 2             | 2.9458           | R.ASPDPKGEMNEVLDTFFKK.S     | 1            | Q6ZNY7_HUMAN         |
| <b><i>CDNA FLJ36810 fis, clone ASTRO2001249 - Homo sapiens (Human)</i></b>                              |               |                  |                             |              |                      |
| Q8N9N8                                                                                                  | 3             | 5.1741           | R.TPGNNLHEVETAQGQR.F        | 2            | Q8N9N8_HUMAN         |
| <b><i>CDNA FLJ41346 fis, clone BRAWH2005315, moderately similar to Neuronal-STOP protein - Ho</i></b>   |               |                  |                             |              |                      |
| Q6ZWB8                                                                                                  | 2             | 3.2689           | K.VHDSAVVAPVK.N             | 2            | Q6ZWB8_HUMAN         |
| <b><i>CDNA FLJ42542 fis, clone BRACE3004435 - Homo sapiens (Human)</i></b>                              |               |                  |                             |              |                      |
| Q6ZVI5                                                                                                  | 2             | 3.1453           | R.SPGSLSPWLLGRR.G           | 1            | Q6ZVI5_HUMAN         |
| <b><i>CDNA FLJ42730 fis, clone BRAWH2010536, weakly similar to Homo sapiens paraneoplastic anti</i></b> |               |                  |                             |              |                      |
| Q6ZVD1                                                                                                  | 3             | 4.1339           | K.AQAALVEFVEDVNHAAIPR.E     | 1            | Q6ZVD1_HUMAN         |
| <b><i>CDNA FLJ43363 fis, clone NT2RP7017474 - Homo sapiens (Human)</i></b>                              |               |                  |                             |              |                      |
| Q6ZUS6                                                                                                  | 2             | 3.4512           | R.SETGPAPPGLAIQGELPK.S      | 1            | Q6ZUS6_HUMAN         |
| <b><i>CDNA FLJ44026 fis, clone TESTI4026762 - Homo sapiens (Human)</i></b>                              |               |                  |                             |              |                      |
| Q6ZU35                                                                                                  | 2             | 3.2491           | K.DTGLTAAPQEPK.A            | 1            | Q6ZU35_HUMAN         |
| Q6ZU35                                                                                                  | 2             | 3.0222           | R.DEEEEATER.K               | 1            | Q6ZU35_HUMAN         |
| Q6ZU35                                                                                                  | 2             | 2.7435           | K.RDEEEEEATER.K             | 1            | Q6ZU35_HUMAN         |
| Q6ZU35                                                                                                  | 2             | 2.9496           | K.RPETAVSR.L                | 1            | Q6ZU35_HUMAN         |
| <b><i>CDNA FLJ45252 fis, clone BRHIP2011199 - Homo sapiens (Human)</i></b>                              |               |                  |                             |              |                      |
| Q6ZSR9                                                                                                  | 2             | 3.893            | K.SSM#APSQPEESDVFLR.A       | 2            | Q6ZSR9_HUMAN         |
| Q6ZSR9                                                                                                  | 3             | 4.3771           | R.HYSPEDEPSPEAQPIAAYK.I     | 3            | Q6ZSR9_HUMAN         |
| <b><i>CDNA FLJ45505 fis, clone BRTHA2020642, weakly similar to DRR1 protein - Homo sapiens (Hu</i></b>  |               |                  |                             |              |                      |
| Q6ZSI4                                                                                                  | 2             | 4.1112           | K.KQLQEEQENAPEFVK.V         | 12           | Q6ZSI4_HUMAN         |
| Q6ZSI4                                                                                                  | 2             | 4.4696           | K.LQEEQENAPEFVK.V           | 3            | Q6ZSI4_HUMAN         |
| Q6ZSI4                                                                                                  | 3             | 6.4116           | K.LEQLELEKQKLQEEQENAPEFVK.V | 2            | Q6ZSI4_HUMAN         |

| <i>Accession No*</i> | <i>Charge</i> | <i>XC(Max)**</i> | <i>Peptide*</i>  | <i>TC***</i> | <i>Reference No*</i> |
|----------------------|---------------|------------------|------------------|--------------|----------------------|
| Q6ZSI4               | 1             | 3.3944           | R.TGQEVAQAQES.-  | 5            | Q6ZSI4_HUMAN         |
| Q6ZSI4               | 2             | 3.676            | R.RTGQEVAQAQES.- | 2            | Q6ZSI4_HUMAN         |

***CDNA FLJ46846 fis, clone UTERU3004635, moderately similar to Neuroblast differentiation asso***

|        |   |        |                                |   |              |
|--------|---|--------|--------------------------------|---|--------------|
| Q6ZQN2 | 2 | 3.1121 | K.ISMPDIDFNKGP.K.V             | 3 | Q6ZQN2_HUMAN |
| Q6ZQN2 | 3 | 4.1558 | K.FKMPEINIK.A                  | 2 | Q6ZQN2_HUMAN |
| Q6ZQN2 | 2 | 3.4301 | K.VEGDLKGPEVDIR.D              | 2 | Q6ZQN2_HUMAN |
| Q6ZQN2 | 3 | 4.3929 | K.ADLDVSGPKVDIDVPDVNIEGPD.AK.L | 3 | Q6ZQN2_HUMAN |
| Q6ZQN2 | 3 | 3.851  | K.MKGDVDVSLPK.V                | 1 | Q6ZQN2_HUMAN |
| Q6ZQN2 | 2 | 4.5394 | K.SPQISM#SDIDLNLK.G            | 3 | Q6ZQN2_HUMAN |
| Q6ZQN2 | 3 | 4.3501 | K.SPQISM#SDIDLNLKGP.K.I        | 2 | Q6ZQN2_HUMAN |
| Q6ZQN2 | 2 | 4.4647 | K.SPQISMSDIDLNLK.G             | 2 | Q6ZQN2_HUMAN |
| Q6ZQN2 | 2 | 4.0022 | K.VDIDAPDVSIEGPD.AK.L          | 3 | Q6ZQN2_HUMAN |
| Q6ZQN2 | 2 | 3.6942 | K.M#KGDVDVSLPK.V               | 3 | Q6ZQN2_HUMAN |
| Q6ZQN2 | 2 | 3.1616 | K.VDIDVPDVNIEGPD.AK.L          | 2 | Q6ZQN2_HUMAN |
| Q6ZQN2 | 2 | 2.7553 | K.ISMPDIDFNK.G                 | 2 | Q6ZQN2_HUMAN |
| Q6ZQN2 | 3 | 5.0962 | K.VESDLKGPEVDIEGPEG.K.L        | 5 | Q6ZQN2_HUMAN |
| Q6ZQN2 | 2 | 5.0289 | K.VGIDTPDIDIHGPEG.K.L          | 4 | Q6ZQN2_HUMAN |
| Q6ZQN2 | 2 | 3.0478 | K.VKGDM#DISLPK.V               | 2 | Q6ZQN2_HUMAN |
| Q6ZQN2 | 2 | 3.7608 | K.VKGDMDISLPK.V                | 4 | Q6ZQN2_HUMAN |
| Q6ZQN2 | 3 | 4.5091 | K.SPQISMSDIDLNLKGP.K.I         | 2 | Q6ZQN2_HUMAN |
| Q6ZQN2 | 2 | 5.9573 | K.GPSLDIDTPDVNIEGPEG.K.L       | 6 | Q6ZQN2_HUMAN |
| Q6ZQN2 | 2 | 3.7296 | K.GPGVDVNLKGPR.I               | 2 | Q6ZQN2_HUMAN |
| Q6ZQN2 | 2 | 3.2538 | K.ADIEISGPK.V                  | 2 | Q6ZQN2_HUMAN |
| Q6ZQN2 | 3 | 4.4409 | K.MEGDLKAPEVDIK.G              | 3 | Q6ZQN2_HUMAN |
| Q6ZQN2 | 3 | 4.2459 | K.M#EGDLKAPEVDIKGP.K.V         | 2 | Q6ZQN2_HUMAN |
| Q6ZQN2 | 3 | 5.4048 | K.ADIDVSGPKVDIDTPDIDIHGPEG.K.L | 1 | Q6ZQN2_HUMAN |
| Q6ZQN2 | 2 | 2.7228 | K.APEVDIKGP.K.V                | 1 | Q6ZQN2_HUMAN |
| Q6ZQN2 | 2 | 3.8684 | K.FSMPGFKGEGPEVDVNLPK.A        | 1 | Q6ZQN2_HUMAN |
| Q6ZQN2 | 2 | 3.3808 | K.GEGPDVDVTLPK.A               | 2 | Q6ZQN2_HUMAN |
| Q6ZQN2 | 3 | 5.8083 | K.GPQVSGELKGP.GVDVNLKGPR.I     | 2 | Q6ZQN2_HUMAN |
| Q6ZQN2 | 3 | 3.7323 | K.VDIDTPDIDIHGPEG.K.L          | 3 | Q6ZQN2_HUMAN |
| Q6ZQN2 | 2 | 3.0454 | K.IKGDM#DISVPK.L               | 1 | Q6ZQN2_HUMAN |
| Q6ZQN2 | 2 | 3.5493 | K.IKGDMDISVPK.L                | 3 | Q6ZQN2_HUMAN |

***CDNA FLJ46889 fis, clone UTERU3017995, highly similar to Homo sapiens likely ortholog of rat***

|        |   |        |                        |   |              |
|--------|---|--------|------------------------|---|--------------|
| Q6ZQU3 | 2 | 4.3774 | K.ASSILINESEPTTNIQIR.L | 2 | Q6ZQU3_HUMAN |
|--------|---|--------|------------------------|---|--------------|

| <i>Accession No*</i>                                                                | <i>Charge</i> | <i>XC(Max)**</i> | <i>Peptide*</i>                   | <i>TC***</i> | <i>Reference No*</i> |
|-------------------------------------------------------------------------------------|---------------|------------------|-----------------------------------|--------------|----------------------|
| <b><i>CDNA: FLJ21687 fis, clone COL09385 - Homo sapiens (Human)</i></b>             |               |                  |                                   |              |                      |
| Q9H6Y5                                                                              | 2             | 3.0537           | R.GAAQLAQEMAAGR.R                 | 1            | Q9H6Y5_HUMAN         |
| <b><i>CDNA: FLJ21963 fis, clone HEP05583 - Homo sapiens (Human)</i></b>             |               |                  |                                   |              |                      |
| Q9H6R3                                                                              | 2             | 3.2855           | K.DINATEEQVLEEIVK.H               | 2            | Q9H6R3_HUMAN         |
| <b><i>CDNA: FLJ22312 fis, clone HRC05210. - Homo sapiens (Human)</i></b>            |               |                  |                                   |              |                      |
| Q9H6G0                                                                              | 2             | 2.9806           | K.LTGVIVENENITK.E                 | 1            | Q9H6G0_HUMAN         |
| Q9H6G0                                                                              | 2             | 3.8654           | R.AGSISSEEV DGSQGNMMR.M           | 2            | Q9H6G0_HUMAN         |
| Q9H6G0                                                                              | 2             | 2.8646           | R.NGQTEDVATGPR.R                  | 1            | Q9H6G0_HUMAN         |
| Q9H6G0                                                                              | 3             | 6.8691           | R.RNENSEVDTSAGSGSAPSVLHQR.N       | 1            | Q9H6G0_HUMAN         |
| Q9H6G0                                                                              | 3             | 3.9719           | R.TVLEGSTASTSPADHSALPNQSLTVR.E    | 1            | Q9H6G0_HUMAN         |
| <b><i>Cell adhesion molecule 1 precursor - Homo sapiens (Human)</i></b>             |               |                  |                                   |              |                      |
| Q9BY67                                                                              | 3             | 4.2435           | K.GADDAADADTAIINAEGGQNNSEEK.E     | 2            | CADM1_HUMAN          |
| <b><i>Cell adhesion molecule 4 precursor - Homo sapiens (Human)</i></b>             |               |                  |                                   |              |                      |
| Q8NFZ8                                                                              | 2             | 4.1999           | K.QTQYVLDVQYSPTAR.I               | 3            | CADM4_HUMAN          |
| Q8NFZ8                                                                              | 2             | 3.4215           | R.FQLEEFSPR.R                     | 5            | CADM4_HUMAN          |
| Q8NFZ8                                                                              | 3             | 5.9124           | R.LHQYDGSIVVIQNPQR.Q              | 5            | CADM4_HUMAN          |
| Q8NFZ8                                                                              | 3             | 4.3491           | K.GSYLTHEASGLDEQGEAR.E            | 2            | CADM4_HUMAN          |
| <b><i>Cell cycle associated protein 1 - Homo sapiens (Human)</i></b>                |               |                  |                                   |              |                      |
| Q9BV09                                                                              | 3             | 5.1013           | K.SSGPPPPSGSSGSEAAAGAGAAAPASQHPAT | 3            | Q9BV09_HUMAN         |
| Q9BV09                                                                              | 2             | 2.9504           | R.DGYQQNFK.R                      | 2            | Q9BV09_HUMAN         |
| Q9BV09                                                                              | 3             | 6.1386           | K.SSGPPPPSGSSGSEAAAGAGAAAPASQHPAT | 2            | Q9BV09_HUMAN         |
| <b><i>Cell cycle related kinase - Homo sapiens (Human)</i></b>                      |               |                  |                                   |              |                      |
| A2A390                                                                              | 2             | 2.7572           | R.VGWQCLPSILQTGEIVALK.K           | 1            | A2A390_HUMAN         |
| <b><i>Cell division cycle 2-like protein kinase 5 - Homo sapiens (Human)</i></b>    |               |                  |                                   |              |                      |
| Q14004                                                                              | 3             | 5.6195           | K.VETDAAQAAVQSFAVLLTQLIK.A        | 3            | CD2L5_HUMAN          |
| <b><i>Cell division cycle 2-related protein kinase 7 - Homo sapiens (Human)</i></b> |               |                  |                                   |              |                      |
| Q9NYV4                                                                              | 2             | 5.2924           | K.DGSGGASGTLQPSSGGGSSNSR.E        | 2            | CD2L7_HUMAN          |
| <b><i>Cell division cycle 5-like protein - Homo sapiens (Human)</i></b>             |               |                  |                                   |              |                      |
| Q99459                                                                              | 2             | 2.9267           | R.GVDYNAEIPFEK.K                  | 2            | CDC5L_HUMAN          |
| Q99459                                                                              | 2             | 2.8156           | R.DNEEETDDPR.K                    | 1            | CDC5L_HUMAN          |
| Q99459                                                                              | 3             | 5.9222           | R.ILQEAQNLMLTNDVDTPLK.G           | 5            | CDC5L_HUMAN          |
| Q99459                                                                              | 2             | 3.469            | R.TPSNGAEGLTTPR.S                 | 2            | CDC5L_HUMAN          |

| <i>Accession No*</i> | <i>Charge</i> | <i>XC(Max)**</i> | <i>Peptide*</i>             | <i>TC***</i> | <i>Reference No*</i> |
|----------------------|---------------|------------------|-----------------------------|--------------|----------------------|
| Q99459               | 3             | 4.9027           | R.SKLVLPA PQISDAELQEVVK.V   | 2            | CDC5L_HUMAN          |
| Q99459               | 2             | 4.3533           | R.QVVQTPNTVLSTPFR.T         | 4            | CDC5L_HUMAN          |
| Q99459               | 3             | 4.8524           | R.DKLNINPEDGMADYS DPSYVK.Q  | 1            | CDC5L_HUMAN          |
| Q99459               | 2             | 3.171            | K.LNINPEDGM#ADYS DPSYVK.Q   | 1            | CDC5L_HUMAN          |
| Q99459               | 3             | 4.7932           | K.GGLNTP LHESDFSGVTPQR.Q    | 7            | CDC5L_HUMAN          |
| Q99459               | 3             | 5.3519           | K.KPALGFYDTSEENYQALDADFRK.L | 2            | CDC5L_HUMAN          |
| Q99459               | 2             | 3.5641           | K.VGQASEIAR.Q               | 5            | CDC5L_HUMAN          |
| Q99459               | 2             | 3.8633           | K.LNINPEDGMADYS DPSYVK.Q    | 2            | CDC5L_HUMAN          |
| Q99459               | 2             | 2.8912           | R.SGTTPKPVINSTPGR.T         | 1            | CDC5L_HUMAN          |
| Q99459               | 2             | 3.3001           | R.ILQEAQNL M#ALTNVD TPLK.G  | 2            | CDC5L_HUMAN          |

***Cell division cycle and apoptosis regulator protein 1 - Homo sapiens (Human)***

|        |   |        |                        |   |             |
|--------|---|--------|------------------------|---|-------------|
| Q8IX12 | 2 | 3.3837 | K.DLSQLQENLK.I         | 1 | CCAR1_HUMAN |
| Q8IX12 | 2 | 3.6402 | R.IQTLPNQ NQSQTQPLLK.T | 3 | CCAR1_HUMAN |

***Cell division cycle protein 27 homolog - Homo sapiens (Human)***

|        |   |        |                |   |             |
|--------|---|--------|----------------|---|-------------|
| P30260 | 2 | 3.2209 | K.SVFSQSGNSR.E | 2 | CDC27_HUMAN |
|--------|---|--------|----------------|---|-------------|

***Cell surface glycoprotein MUC18 precursor - Homo sapiens (Human)***

|        |   |        |                     |   |             |
|--------|---|--------|---------------------|---|-------------|
| P43121 | 2 | 3.2784 | R.GATLALTQVTPQDER.I | 1 | MUC18_HUMAN |
| P43121 | 2 | 3.3504 | R.QGQQQSEPG EYEQR.L | 2 | MUC18_HUMAN |
| P43121 | 2 | 3.2516 | K.VWLEVEPVGMLK.E    | 1 | MUC18_HUMAN |

***Cellular retinoic acid-binding protein 1 - Homo sapiens (Human)***

|        |   |        |                   |   |             |
|--------|---|--------|-------------------|---|-------------|
| P29762 | 2 | 2.9468 | R.SLATWENENK.I    | 2 | RABP1_HUMAN |
| P29762 | 2 | 4.3393 | K.VGEGFEEETVDGR.K | 2 | RABP1_HUMAN |

***Centaurin-beta 2 - Homo sapiens (Human)***

|        |   |        |                      |   |             |
|--------|---|--------|----------------------|---|-------------|
| Q15057 | 2 | 4.3452 | R.SNDSGIQQSSDDGR.E   | 2 | CENB2_HUMAN |
| Q15057 | 2 | 2.7224 | R.AALEEVEGDVAELELK.L | 1 | CENB2_HUMAN |

***Centrin-2 - Homo sapiens (Human)***

|        |   |        |                                    |   |             |
|--------|---|--------|------------------------------------|---|-------------|
| P41208 | 2 | 4.447  | K.MNFGDFLTVM TQK.M                 | 4 | CETN2_HUMAN |
| P41208 | 2 | 3.9847 | K.MNFGDFLTVM#TQK.M                 | 2 | CETN2_HUMAN |
| P41208 | 3 | 4.4384 | R.M#SPKPELT EEQKQ EIR.E            | 1 | CETN2_HUMAN |
| P41208 | 2 | 4.5508 | K.M#NFGDFLTVM TQK.M                | 2 | CETN2_HUMAN |
| P41208 | 2 | 3.2893 | K.M#ISEIDKEGTGK.M                  | 2 | CETN2_HUMAN |
| P41208 | 3 | 6.3066 | K.ELGENLTDEELQEM#IDEADRDGDGEVSEQEF | 2 | CETN2_HUMAN |
| P41208 | 2 | 4.1004 | K.MISEIDKEGTGK.M                   | 4 | CETN2_HUMAN |
| P41208 | 2 | 4.4239 | K.M#NFGDFLTVM#TQK.M                | 2 | CETN2_HUMAN |

| <i>Accession No*</i>                                                        | <i>Charge</i> | <i>XC(Max)**</i> | <i>Peptide*</i>                 | <i>TC***</i> | <i>Reference No*</i> |
|-----------------------------------------------------------------------------|---------------|------------------|---------------------------------|--------------|----------------------|
| <b><i>Centrosomal protein of 170 kDa - Homo sapiens (Human)</i></b>         |               |                  |                                 |              |                      |
| Q5SW79                                                                      | 2             | 3.6734           | R.FGYDTNLFTVVQGEMR.V            | 1            | CE170_HUMAN          |
| <b><i>Ceruloplasmin precursor - Homo sapiens (Human)</i></b>                |               |                  |                                 |              |                      |
| P00450                                                                      | 3             | 4.8524           | K.KLISVDTEHSNIYLQNGPDR.I        | 2            | CERU_HUMAN           |
| P00450                                                                      | 3             | 6.8133           | K.HYYIGIETTWDYASDHGEK.K         | 2            | CERU_HUMAN           |
| P00450                                                                      | 2             | 2.926            | K.GAYPLSIEPIGVR.F               | 1            | CERU_HUMAN           |
| <b><i>CGG triplet repeat-binding protein 1 - Homo sapiens (Human)</i></b>   |               |                  |                                 |              |                      |
| Q9UFW8                                                                      | 2             | 3.0236           | K.VSVIQDFVK.M                   | 2            | CGBP1_HUMAN          |
| <b><i>CGI-151 protein - Homo sapiens (Human)</i></b>                        |               |                  |                                 |              |                      |
| Q9Y3E9                                                                      | 3             | 4.5368           | K.AAFQPEANPSHLTLNTALVESEDL.-    | 3            | Q9Y3E9_HUMAN         |
| Q9Y3E9                                                                      | 2             | 4.4488           | R.YAALSDQGLDIK.A                | 4            | Q9Y3E9_HUMAN         |
| <b><i>Charged multivesicular body protein 1a - Homo sapiens (Human)</i></b> |               |                  |                                 |              |                      |
| Q9HD42                                                                      | 2             | 2.7393           | R.SQEDQLSR.R                    | 1            | CHM1A_HUMAN          |
| <b><i>Charged multivesicular body protein 2a - Homo sapiens (Human)</i></b> |               |                  |                                 |              |                      |
| O43633                                                                      | 3             | 4.7376           | K.KAEAAASALADADADLEER.L         | 1            | CHM2A_HUMAN          |
| O43633                                                                      | 3             | 7.3833           | K.KAEAAASALADADADLEERLK.N       | 2            | CHM2A_HUMAN          |
| <b><i>Charged multivesicular body protein 2b - Homo sapiens (Human)</i></b> |               |                  |                                 |              |                      |
| Q9UQN3                                                                      | 2             | 3.5624           | K.ATISDEEIER.Q                  | 2            | CHM2B_HUMAN          |
| Q9UQN3                                                                      | 2             | 3.0475           | K.TLQTM#QNFQK.E                 | 1            | CHM2B_HUMAN          |
| Q9UQN3                                                                      | 2             | 3.4679           | K.TLQTMQNFQK.E                  | 2            | CHM2B_HUMAN          |
| Q9UQN3                                                                      | 2             | 3.6399           | K.TVDDVIKEQNR.E                 | 2            | CHM2B_HUMAN          |
| <b><i>Charged multivesicular body protein 4b - Homo sapiens (Human)</i></b> |               |                  |                                 |              |                      |
| Q9H444                                                                      | 3             | 3.9293           | R.LRDTEEM#LSK.K                 | 1            | CHM4B_HUMAN          |
| Q9H444                                                                      | 2             | 4.4873           | R.EALENANTNTEVLK.N              | 7            | CHM4B_HUMAN          |
| Q9H444                                                                      | 1             | 2.2455           | K.NMGYAAK.A                     | 1            | CHM4B_HUMAN          |
| Q9H444                                                                      | 3             | 4.315            | K.KIEQELTAACK.H                 | 2            | CHM4B_HUMAN          |
| Q9H444                                                                      | 2             | 3.1752           | K.GGPTPQEAIQR.L                 | 2            | CHM4B_HUMAN          |
| Q9H444                                                                      | 3             | 5.2909           | K.QLAQIDGTLSTIEFQR.E            | 2            | CHM4B_HUMAN          |
| Q9H444                                                                      | 1             | 2.1957           | K.NM#GYAAK.A                    | 1            | CHM4B_HUMAN          |
| <b><i>Charged multivesicular body protein 5 - Homo sapiens (Human)</i></b>  |               |                  |                                 |              |                      |
| Q9NZZ3                                                                      | 3             | 7.2186           | K.IDQIEDLQDQLEDMMEDANEIQEALSR.S | 2            | CHMP5_HUMAN          |
| Q9NZZ3                                                                      | 2             | 2.8242           | K.APPPSLTDCIGTVDSR.A            | 2            | CHMP5_HUMAN          |
| Q9NZZ3                                                                      | 2             | 3.121            | K.RMYEQQR.D                     | 3            | CHMP5_HUMAN          |

| <i>Accession No*</i>                                                                | <i>Charge</i> | <i>XC(Max)**</i> | <i>Peptide*</i>                    | <i>TC***</i> | <i>Reference No*</i> |
|-------------------------------------------------------------------------------------|---------------|------------------|------------------------------------|--------------|----------------------|
| Q9NZZ3                                                                              | 2             | 3.7184           | K.ISRLDAELVK.Y                     | 2            | CHMP5_HUMAN          |
| Q9NZZ3                                                                              | 2             | 3.4923           | K.NKDGVLVDEFGLPQIPAS.-             | 5            | CHMP5_HUMAN          |
| <b><i>Chloride channel CLIC-like protein 1 precursor - Homo sapiens (Human)</i></b> |               |                  |                                    |              |                      |
| Q96S66                                                                              | 3             | 6.591            | K.ESSTESSQSAKPVSGQDTSNGTEGSPAEEK.A | 2            | CLCC1_HUMAN          |
| Q96S66                                                                              | 2             | 3.9788           | K.SEAAGSPDQGSTYSPAR.G              | 3            | CLCC1_HUMAN          |
| <b><i>Chloride intracellular channel 6 - Homo sapiens (Human)</i></b>               |               |                  |                                    |              |                      |
| Q96NY7                                                                              | 2             | 3.9459           | R.VGDSVDAEGPAGDSVDAEGR.V           | 2            | CLIC6_HUMAN          |
| <b><i>Chloride intracellular channel protein 4 - Homo sapiens (Human)</i></b>       |               |                  |                                    |              |                      |
| Q9Y696                                                                              | 2             | 2.7451           | R.YLTNAYS.R.D                      | 1            | CLIC4_HUMAN          |
| Q9Y696                                                                              | 3             | 4.1591           | K.NSRPEANEALER.G                   | 6            | CLIC4_HUMAN          |
| <b><i>Choline dehydrogenase, mitochondrial precursor - Homo sapiens (Human)</i></b> |               |                  |                                    |              |                      |
| Q8NE62                                                                              | 2             | 3.7202           | K.M#GQPSDPTAVVDPQTR.V              | 2            | CHDH_HUMAN           |
| <b><i>Chromatin modifying protein 4A - Homo sapiens (Human)</i></b>                 |               |                  |                                    |              |                      |
| Q14D22                                                                              | 2             | 3.0956           | K.KQEFLEQK.I                       | 6            | Q14D22_HUMAN         |
| Q14D22                                                                              | 2             | 2.8644           | R.TMELAAQSM#K.K                    | 1            | Q14D22_HUMAN         |
| Q14D22                                                                              | 2             | 4.2187           | R.EAIENATTNAEVL.R.T                | 5            | Q14D22_HUMAN         |
| Q14D22                                                                              | 2             | 3.0569           | K.EKGPTPEEAIQK.L                   | 2            | Q14D22_HUMAN         |
| Q14D22                                                                              | 2             | 2.7555           | R.TMELAAQSMKK.A                    | 1            | Q14D22_HUMAN         |
| Q14D22                                                                              | 2             | 3.4835           | R.TMELAAQSMK.K                     | 1            | Q14D22_HUMAN         |
| Q14D22                                                                              | 3             | 4.6787           | R.FEQQLAQTDTGLSTLEFQR.E            | 4            | Q14D22_HUMAN         |
| Q14D22                                                                              | 2             | 2.7901           | K.RAALQALR.R                       | 1            | Q14D22_HUMAN         |
| Q14D22                                                                              | 2             | 2.8875           | K.IQQELQTAK.K                      | 2            | Q14D22_HUMAN         |
| Q14D22                                                                              | 2             | 3.5812           | K.LPSVPSTHLPAGPAPK.V               | 1            | Q14D22_HUMAN         |
| Q14D22                                                                              | 2             | 3.2804           | K.IQQELQTAKK.Y                     | 2            | Q14D22_HUMAN         |
| Q14D22                                                                              | 2             | 3.9715           | K.RFEQQLAQTDTGLSTLEFQR.E           | 2            | Q14D22_HUMAN         |
| <b><i>Chromobox protein homolog 1 - Homo sapiens (Human)</i></b>                    |               |                  |                                    |              |                      |
| P83916                                                                              | 2             | 3.0085           | K.GKVEYLLK.W                       | 2            | CBX1_HUMAN           |
| P83916                                                                              | 3             | 5.7508           | K.KKVEEVLEEEEEYVVEK.V              | 2            | CBX1_HUMAN           |
| P83916                                                                              | 2             | 5.0654           | K.KVEEVLEEEEEYVVEK.V               | 6            | CBX1_HUMAN           |
| P83916                                                                              | 2             | 3.6772           | K.NSDEADLVPK.E                     | 7            | CBX1_HUMAN           |
| P83916                                                                              | 2             | 4.5669           | K.NSDEADLPAKEANVK.C                | 3            | CBX1_HUMAN           |
| P83916                                                                              | 3             | 5.358            | K.WKNSDEADLVPK.E                   | 7            | CBX1_HUMAN           |
| <b><i>Chromobox protein homolog 3 - Homo sapiens (Human)</i></b>                    |               |                  |                                    |              |                      |

| <i>Accession No*</i>                                                      | <i>Charge</i> | <i>XC(Max)**</i> | <i>Peptide*</i>                 | <i>TC***</i> | <i>Reference No*</i> |
|---------------------------------------------------------------------------|---------------|------------------|---------------------------------|--------------|----------------------|
| Q13185                                                                    | 2             | 4.2626           | K.VEEAEPEEFVVEK.V               | 6            | CBX3_HUMAN           |
| Q13185                                                                    | 2             | 4.9535           | K.WKDSDEADLVLAKE.E              | 6            | CBX3_HUMAN           |
| Q13185                                                                    | 2             | 3.9254           | R.KSLSDSESDDSK.S                | 2            | CBX3_HUMAN           |
| Q13185                                                                    | 2             | 4.369            | K.DSDEADLVLAKE.E                | 2            | CBX3_HUMAN           |
| Q13185                                                                    | 2             | 2.9056           | K.SLSDSESDDSK.S                 | 1            | CBX3_HUMAN           |
| Q13185                                                                    | 2             | 3.6855           | R.VVNGKVEYFLK.W                 | 1            | CBX3_HUMAN           |
| Q13185                                                                    | 2             | 5.4563           | K.KVEEAEPEEFVVEK.V              | 4            | CBX3_HUMAN           |
| Q13185                                                                    | 2             | 3.6263           | K.SLSDSESDDSKSK.K               | 1            | CBX3_HUMAN           |
| <b><i>Chromobox protein homolog 5 - Homo sapiens (Human)</i></b>          |               |                  |                                 |              |                      |
| P45973                                                                    | 2             | 3.4464           | K.DTDEADLVLAKE.E                | 1            | CBX5_HUMAN           |
| P45973                                                                    | 2             | 3.0069           | K.REQSNDIAR.G                   | 1            | CBX5_HUMAN           |
| P45973                                                                    | 2             | 5.4533           | K.WKDTDEADLVLAKE.E              | 3            | CBX5_HUMAN           |
| P45973                                                                    | 3             | 4.8177           | R.LTWHAYPEDAENKEK.E             | 2            | CBX5_HUMAN           |
| P45973                                                                    | 2             | 2.9062           | K.SNFNSADDIK.S                  | 1            | CBX5_HUMAN           |
| <b><i>Chromobox protein homolog 6 - Homo sapiens (Human)</i></b>          |               |                  |                                 |              |                      |
| O95503                                                                    | 2             | 3.1593           | K.AEASAPGPGLLLAAPAAPYDAR.S      | 1            | CBX6_HUMAN           |
| <b><i>Chromosome 14 open reading frame 142 - Homo sapiens (Human)</i></b> |               |                  |                                 |              |                      |
| Q0P6C4                                                                    | 3             | 4.8252           | K.DM#VTELFDPVLQGEVQHR.V         | 2            | Q0P6C4_HUMAN         |
| <b><i>Chromosome 2 open reading frame 47 - Homo sapiens (Human)</i></b>   |               |                  |                                 |              |                      |
| Q8WWC4                                                                    | 2             | 2.7539           | K.QLLSASYEFQR.E                 | 1            | Q8WWC4_HUMA          |
| <b><i>Chromosome 20 open reading frame 3 - Homo sapiens (Human)</i></b>   |               |                  |                                 |              |                      |
| A2A2F9                                                                    | 2             | 3.2712           | -.VVTDDDGQAPEAK.D               | 1            | A2A2F9_HUMAN         |
| <b><i>Ciliary dynein heavy chain 3 - Homo sapiens (Human)</i></b>         |               |                  |                                 |              |                      |
| Q8TD57                                                                    | 2             | 2.7235           | K.TLLNSKRQEVAM#M#R.N            | 1            | Q8TD57_HUMAN         |
| <b><i>Cingulin - Homo sapiens (Human)</i></b>                             |               |                  |                                 |              |                      |
| Q9P2M7                                                                    | 2             | 2.7974           | R.ALEEEGKQR.E                   | 1            | CING_HUMAN           |
| Q9P2M7                                                                    | 2             | 3.0219           | R.QALQASQAER.D                  | 2            | CING_HUMAN           |
| Q9P2M7                                                                    | 3             | 6.2625           | K.IGEDSKQALQQLQAQLEDYKEK.A      | 2            | CING_HUMAN           |
| Q9P2M7                                                                    | 2             | 4.0329           | R.LGQEQQTLNR.A                  | 4            | CING_HUMAN           |
| Q9P2M7                                                                    | 3             | 4.2214           | R.LETELDEEKNTVELLTDR.V          | 1            | CING_HUMAN           |
| Q9P2M7                                                                    | 3             | 6.3512           | R.LASSEGFQKPSASLSQLESQNQLLQER.L | 1            | CING_HUMAN           |
| Q9P2M7                                                                    | 2             | 3.063            | R.GRDQVDQLR.T                   | 2            | CING_HUMAN           |
| Q9P2M7                                                                    | 2             | 2.7868           | R.EVEEQHEVNEQLQAR.I             | 1            | CING_HUMAN           |



| <i>Accession No*</i> | <i>Charge</i> | <i>XC(Max)**</i> | <i>Peptide*</i>           | <i>TC***</i> | <i>Reference No*</i> |
|----------------------|---------------|------------------|---------------------------|--------------|----------------------|
| Q9P2M7               | 2             | 3.2291           | R.ELLEEVLEGGK.Q           | 2            | CING_HUMAN           |
| Q9P2M7               | 2             | 2.9699           | K.QRVEEQLR.L              | 1            | CING_HUMAN           |
| Q9P2M7               | 2             | 4.4488           | K.QQLEELNASQEEEGSLAAAK.R  | 2            | CING_HUMAN           |
| Q9P2M7               | 2             | 3.2138           | K.QPAQSQNLSPLSGFSR.S      | 2            | CING_HUMAN           |
| Q9P2M7               | 2             | 3.5065           | R.LQGLEQEAENK.K           | 2            | CING_HUMAN           |
| Q9P2M7               | 2             | 5.1421           | R.SMQDATQDHAVLEAER.Q      | 2            | CING_HUMAN           |
| Q9P2M7               | 2             | 4.2191           | R.TQEELKELQAER.Q          | 3            | CING_HUMAN           |
| Q9P2M7               | 3             | 3.9106           | K.QALQQLQAQLEDYKEK.A      | 2            | CING_HUMAN           |
| Q9P2M7               | 3             | 6.3538           | K.VSRLETELDEEKNTVELLTDR.V | 1            | CING_HUMAN           |

***Cingulin-like protein 1 - Homo sapiens (Human)***

|        |   |        |                            |   |              |
|--------|---|--------|----------------------------|---|--------------|
| Q0VF96 | 3 | 4.7864 | K.QDLQDLLIAKEEQEDLLR.K     | 6 | Q0VF96_HUMAN |
| Q0VF96 | 2 | 3.4723 | K.DLEYELEAK.S              | 2 | Q0VF96_HUMAN |
| Q0VF96 | 2 | 3.1782 | K.EM#ADIVEASR.T            | 2 | Q0VF96_HUMAN |
| Q0VF96 | 2 | 2.8969 | K.EMADIVEASR.T             | 1 | Q0VF96_HUMAN |
| Q0VF96 | 2 | 4.3004 | K.GALIEELLQAK.Q            | 9 | Q0VF96_HUMAN |
| Q0VF96 | 2 | 5.2319 | K.GQQELTQQTNEETAK.Q        | 6 | Q0VF96_HUMAN |
| Q0VF96 | 2 | 4.1057 | K.LLQEENEKLGQR.S           | 5 | Q0VF96_HUMAN |
| Q0VF96 | 2 | 3.322  | K.TLTEEGINNK.K             | 1 | Q0VF96_HUMAN |
| Q0VF96 | 1 | 2.2425 | K.NVEVLASR.S               | 2 | Q0VF96_HUMAN |
| Q0VF96 | 3 | 4.6673 | R.SREQMEQLRNELLQER.A       | 2 | Q0VF96_HUMAN |
| Q0VF96 | 3 | 5.9204 | K.RQLLEQLTKDLEYELEAK.S     | 2 | Q0VF96_HUMAN |
| Q0VF96 | 2 | 2.7798 | R.QDSAGPVLGDGAR.S          | 1 | Q0VF96_HUMAN |
| Q0VF96 | 2 | 3.2754 | K.NQQNIKEER.E              | 6 | Q0VF96_HUMAN |
| Q0VF96 | 2 | 3.4641 | R.SREQMEQLR.N              | 3 | Q0VF96_HUMAN |
| Q0VF96 | 2 | 2.9638 | R.RVAQLQR.Q                | 3 | Q0VF96_HUMAN |
| Q0VF96 | 3 | 4.1032 | R.VQGIDGHPYIVLNNTER.C      | 1 | Q0VF96_HUMAN |
| Q0VF96 | 2 | 5.4407 | R.SQHNEKVEENSTLQQR.L       | 4 | Q0VF96_HUMAN |
| Q0VF96 | 2 | 4.5468 | R.SNTSEQDQAGTEM#R.V        | 5 | Q0VF96_HUMAN |
| Q0VF96 | 2 | 6.0521 | R.RALENELEAAQGNLSQTTQEYK.Q | 4 | Q0VF96_HUMAN |
| Q0VF96 | 3 | 3.7638 | R.QVEEAEEEEIDRLESSK.K      | 1 | Q0VF96_HUMAN |
| Q0VF96 | 3 | 4.5865 | R.QLLEQLTKDLEYELEAK.S      | 2 | Q0VF96_HUMAN |
| Q0VF96 | 2 | 2.7388 | R.QLEELVHAR.K              | 2 | Q0VF96_HUMAN |
| Q0VF96 | 2 | 2.7786 | R.QIEDLKGDEAK.A            | 2 | Q0VF96_HUMAN |
| Q0VF96 | 2 | 5.3126 | R.TSTLELQNLQDEYKEK.N       | 5 | Q0VF96_HUMAN |
| Q0VF96 | 2 | 3.5649 | K.VEENSTLQQR.L             | 3 | Q0VF96_HUMAN |
| Q0VF96 | 2 | 3.115  | R.LMEEELRDYQR.A            | 2 | Q0VF96_HUMAN |

| <i>Accession No*</i> | <i>Charge</i> | <i>XC(Max)**</i> | <i>Peptide*</i>           | <i>TC***</i> | <i>Reference No*</i> |
|----------------------|---------------|------------------|---------------------------|--------------|----------------------|
| Q0VF96               | 2             | 2.7014           | R.LKNEMENER.W             | 1            | Q0VF96_HUMAN         |
| Q0VF96               | 2             | 2.9394           | R.LEESEGELR.K             | 2            | Q0VF96_HUMAN         |
| Q0VF96               | 2             | 4.1318           | K.TFPSASNTQATPDLLK.G      | 1            | Q0VF96_HUMAN         |
| Q0VF96               | 2             | 4.783            | R.SNTSEQDQAGTEMR.V        | 7            | Q0VF96_HUMAN         |
| Q0VF96               | 3             | 4.1712           | K.RQVEEAEEDRLESSK.K       | 2            | Q0VF96_HUMAN         |
| Q0VF96               | 2             | 3.0006           | R.LEESEGELRK.N            | 2            | Q0VF96_HUMAN         |
| Q0VF96               | 2             | 3.3633           | R.KVNLVFEK.I              | 4            | Q0VF96_HUMAN         |
| Q0VF96               | 2             | 3.4682           | R.IAELEDRLESEER.D         | 1            | Q0VF96_HUMAN         |
| Q0VF96               | 1             | 2.6367           | R.APSLGAQSK.K             | 3            | Q0VF96_HUMAN         |
| Q0VF96               | 2             | 3.14             | R.ANLQLSNR.R              | 4            | Q0VF96_HUMAN         |
| Q0VF96               | 1             | 2.2167           | R.ANLEELR.S               | 1            | Q0VF96_HUMAN         |
| Q0VF96               | 2             | 5.2832           | R.ALENELEAAQGNLSQTTQEQQ.Q | 7            | Q0VF96_HUMAN         |
| Q0VF96               | 2             | 4.5825           | K.VLETEGSQESTVIR.A        | 2            | Q0VF96_HUMAN         |
| Q0VF96               | 2             | 3.2256           | K.AGSYGV SIR.V            | 2            | Q0VF96_HUMAN         |

***Cisplatin resistance-associated overexpressed protein - Homo sapiens (Human)***

|        |   |        |                              |   |            |
|--------|---|--------|------------------------------|---|------------|
| O95232 | 3 | 3.9161 | K.ESDTKNEVNGTSEDIKSEGDTQSN.- | 1 | CROP_HUMAN |
|--------|---|--------|------------------------------|---|------------|

***C-jun-amino-terminal kinase-interacting protein 4 - Homo sapiens (Human)***

|        |   |        |                       |   |            |
|--------|---|--------|-----------------------|---|------------|
| O60271 | 2 | 2.7935 | R.EVENLILENTQLLET.K.N | 1 | JIP4_HUMAN |
| O60271 | 2 | 3.5102 | K.VTDAPNKSEISK.H      | 2 | JIP4_HUMAN |
| O60271 | 3 | 5.3709 | K.LHQLSGSDQLESTAHSR.I | 2 | JIP4_HUMAN |
| O60271 | 2 | 2.8628 | K.FQELSQPR.S          | 1 | JIP4_HUMAN |
| O60271 | 2 | 2.9314 | R.SSTLSQLPGDK.S       | 2 | JIP4_HUMAN |
| O60271 | 2 | 5.1139 | K.AFDLSEETEASLASR.R   | 3 | JIP4_HUMAN |
| O60271 | 2 | 3.1933 | K.AVEQEDELSDVSQGGSK.A | 1 | JIP4_HUMAN |

***Clathrin interactor 1 - Homo sapiens (Human)***

|        |   |        |                        |   |            |
|--------|---|--------|------------------------|---|------------|
| Q14677 | 2 | 4.4545 | K.HIHITQATETTTTR.H     | 4 | EPN4_HUMAN |
| Q14677 | 2 | 3.2646 | R.SQNTDMVQK.S          | 3 | EPN4_HUMAN |
| Q14677 | 2 | 4.6485 | K.TIDLGAAHYTGDK.A      | 3 | EPN4_HUMAN |
| Q14677 | 2 | 3.5657 | K.IGSTIDDTISK.F        | 2 | EPN4_HUMAN |
| Q14677 | 2 | 4.0001 | K.GEFKDEEETVTTK.H      | 8 | EPN4_HUMAN |
| Q14677 | 2 | 4.2752 | K.ASPDQNASTHTPQSSVK.T  | 3 | EPN4_HUMAN |
| Q14677 | 3 | 4.8773 | K.LGELSDKIGSTIDDTISK.F | 2 | EPN4_HUMAN |

***Clathrin light chain A - Homo sapiens (Human)***

|        |   |        |                     |   |            |
|--------|---|--------|---------------------|---|------------|
| P09496 | 2 | 3.8672 | K.ELEEYARQDEQLQK.T  | 2 | CLCA_HUMAN |
| P09496 | 3 | 4.2756 | R.EEQMERLEALDANSR.K | 2 | CLCA_HUMAN |

| <i>Accession No*</i>                                                                   | <i>Charge</i> | <i>XC(Max)**</i> | <i>Peptide*</i>             | <i>TC***</i> | <i>Reference No*</i> |
|----------------------------------------------------------------------------------------|---------------|------------------|-----------------------------|--------------|----------------------|
| P09496                                                                                 | 2             | 3.3973           | R.KQEAEWKEK.A               | 3            | CLCA_HUMAN           |
| P09496                                                                                 | 2             | 3.3468           | R.LEALDANSR.K               | 7            | CLCA_HUMAN           |
| P09496                                                                                 | 2             | 3.1313           | K.WREEQMER.L                | 4            | CLCA_HUMAN           |
| P09496                                                                                 | 2             | 3.9937           | K.AIKELEEWYAR.Q             | 7            | CLCA_HUMAN           |
| P09496                                                                                 | 1             | 2.9837           | R.KQEAEWK.E                 | 3            | CLCA_HUMAN           |
| P09496                                                                                 | 2             | 3.1267           | R.LQSEPEISIRK.W             | 4            | CLCA_HUMAN           |
| P09496                                                                                 | 1             | 2.1841           | K.ELEEWYAR.Q                | 1            | CLCA_HUMAN           |
| P09496                                                                                 | 1             | 3.0282           | R.LQSEPEISIR.K              | 2            | CLCA_HUMAN           |
| P09496                                                                                 | 2             | 5.1168           | K.AIKELEEWYARQDEQLQK.T      | 3            | CLCA_HUMAN           |
| <b><i>Clathrin light chain B - Homo sapiens (Human)</i></b>                            |               |                  |                             |              |                      |
| P09497                                                                                 | 2             | 3.213            | R.LTQEPESIRK.W              | 5            | CLCB_HUMAN           |
| P09497                                                                                 | 2             | 3.2623           | K.RLQELDAASK.V              | 6            | CLCB_HUMAN           |
| P09497                                                                                 | 2             | 2.796            | K.VTEQEW.R.E                | 3            | CLCB_HUMAN           |
| P09497                                                                                 | 3             | 4.7581           | R.LQELDAASKVTEQEW.R.E       | 3            | CLCB_HUMAN           |
| P09497                                                                                 | 1             | 3.2322           | R.LTQEPESIR.K               | 3            | CLCB_HUMAN           |
| P09497                                                                                 | 2             | 3.554            | K.KDLEEWNR.Q                | 4            | CLCB_HUMAN           |
| P09497                                                                                 | 2             | 3.2878           | K.ESKEETPGTEWEK.V           | 4            | CLCB_HUMAN           |
| P09497                                                                                 | 1             | 3.0922           | K.DLEEWNR.Q                 | 6            | CLCB_HUMAN           |
| P09497                                                                                 | 1             | 2.7797           | R.LQELDAASK.V               | 6            | CLCB_HUMAN           |
| <b><i>Cleavage and polyadenylation specificity factor 6 - Homo sapiens (Human)</i></b> |               |                  |                             |              |                      |
| Q16630                                                                                 | 2             | 3.806            | R.TPLSEAEFEEIM#NR.N         | 1            | CPSF6_HUMAN          |
| Q16630                                                                                 | 2             | 3.7198           | R.TPLSEAEFEEIMNR.N          | 1            | CPSF6_HUMAN          |
| <b><i>Cleavage stimulation factor 64 kDa subunit - Homo sapiens (Human)</i></b>        |               |                  |                             |              |                      |
| P33240                                                                                 | 2             | 3.1826           | R.GSLPANVPTPR.G             | 2            | CSTF2_HUMAN          |
| <b><i>CLIP-associating protein 1 - Homo sapiens (Human)</i></b>                        |               |                  |                             |              |                      |
| Q7Z460                                                                                 | 2             | 3.6687           | R.DGGAASPATEGR.G            | 7            | CLAP1_HUMAN          |
| <b><i>Clusterin precursor - Homo sapiens (Human)</i></b>                               |               |                  |                             |              |                      |
| P10909                                                                                 | 2             | 3.0183           | R.ELDESLQVAER.L             | 2            | CLUS_HUMAN           |
| P10909                                                                                 | 2             | 4.927            | R.VTTVASHTSDSDVPSGVTEVVVK.L | 3            | CLUS_HUMAN           |
| P10909                                                                                 | 2             | 4.8924           | K.LFDSDPITVTVPEVSR.K        | 5            | CLUS_HUMAN           |
| P10909                                                                                 | 1             | 2.8849           | R.KYNELLK.S                 | 3            | CLUS_HUMAN           |
| P10909                                                                                 | 2             | 3.6535           | K.TLLSNLEEAKK.K             | 4            | CLUS_HUMAN           |
| P10909                                                                                 | 2             | 4.526            | R.KTLLSNLEEAKK.K            | 4            | CLUS_HUMAN           |
| P10909                                                                                 | 1             | 2.5832           | K.FMETVAEK.A                | 3            | CLUS_HUMAN           |

| <i>Accession No*</i>                                                                                                                               | <i>Charge</i> | <i>XC(Max)**</i> | <i>Peptide*</i>                   | <i>TC***</i> | <i>Reference No*</i> |
|----------------------------------------------------------------------------------------------------------------------------------------------------|---------------|------------------|-----------------------------------|--------------|----------------------|
| P10909                                                                                                                                             | 2             | 3.5784           | K.TLLSNLEEAK.K                    | 3            | CLUS_HUMAN           |
| <b><i>C-Myc-binding protein - Homo sapiens (Human)</i></b>                                                                                         |               |                  |                                   |              |                      |
| Q99417                                                                                                                                             | 2             | 2.7445           | K.LAQYEPPQEEK.R                   | 1            | MYCBP_HUMAN          |
| <b><i>c-Myc-responsive protein Rcl - Homo sapiens (Human)</i></b>                                                                                  |               |                  |                                   |              |                      |
| O43598                                                                                                                                             | 3             | 5.9215           | R.FGTVLTEHVAAAELGAR.G             | 16           | RCL_HUMAN            |
| O43598                                                                                                                                             | 2             | 3.1175           | R.FQVWDYEEGEVEALLDR.Y             | 1            | RCL_HUMAN            |
| O43598                                                                                                                                             | 3             | 4.1822           | R.RFGTVLTEHVAAAELGAR.G            | 2            | RCL_HUMAN            |
| <b><i>Coactosin-like protein - Homo sapiens (Human)</i></b>                                                                                        |               |                  |                                   |              |                      |
| Q14019                                                                                                                                             | 1             | 2.2798           | K.AGGANYDAQTE.-                   | 1            | COTL1_HUMAN          |
| Q14019                                                                                                                                             | 2             | 4.2445           | K.EFVISDRKELEEDFIK.S              | 2            | COTL1_HUMAN          |
| Q14019                                                                                                                                             | 2             | 2.9008           | K.ELEEDFIKSELKK.A                 | 1            | COTL1_HUMAN          |
| Q14019                                                                                                                                             | 2             | 2.9744           | K.EFVISDRK.E                      | 1            | COTL1_HUMAN          |
| Q14019                                                                                                                                             | 2             | 3.0145           | K.FALITWIGENVSGLQR.A              | 1            | COTL1_HUMAN          |
| Q14019                                                                                                                                             | 1             | 2.2923           | K.EVVQNFAK.E                      | 1            | COTL1_HUMAN          |
| <b><i>Coatomer subunit epsilon - Homo sapiens (Human)</i></b>                                                                                      |               |                  |                                   |              |                      |
| O14579                                                                                                                                             | 2             | 3.0392           | K.ENDFDRLVLQYAPSA.-               | 2            | COPE_HUMAN           |
| <b><i>Cob(I)yrinic acid <math>\alpha</math>,<math>\epsilon</math>-diamide adenosyltransferase, mitochondrial precursor - Homo sapiens (Hum</i></b> |               |                  |                                   |              |                      |
| Q96EY8                                                                                                                                             | 2             | 4.5201           | R.GPQGVEDGDRPQPSSK.T              | 2            | MMAB_HUMAN           |
| <b><i>Co-chaperone protein HscB, mitochondrial precursor - Homo sapiens (Human)</i></b>                                                            |               |                  |                                   |              |                      |
| Q8IWL3                                                                                                                                             | 2             | 3.3132           | R.SQTEKDFSEK.H                    | 2            | HSC20_HUMAN          |
| Q8IWL3                                                                                                                                             | 2             | 2.7038           | K.HSTLVNDAYK.T                    | 1            | HSC20_HUMAN          |
| <b><i>Cofilin-1 - Homo sapiens (Human)</i></b>                                                                                                     |               |                  |                                   |              |                      |
| P23528                                                                                                                                             | 4             | 5.9833           | K.NIILEEGKEILVGDVGQTVDDPYATFVK.M  | 1            | COF1_HUMAN           |
| P23528                                                                                                                                             | 2             | 3.2093           | R.KSSTPEEVKK.R                    | 2            | COF1_HUMAN           |
| P23528                                                                                                                                             | 2             | 5.9125           | K.EILVGDVGQTVDDPYATFVK.M          | 2            | COF1_HUMAN           |
| P23528                                                                                                                                             | 2             | 4.381            | K.LGGSAVISLEGKPL.-                | 4            | COF1_HUMAN           |
| P23528                                                                                                                                             | 2             | 3.1102           | R.KSSTPEEVK.K                     | 12           | COF1_HUMAN           |
| <b><i>Coiled-coil and C2 domain-containing protein 1A - Homo sapiens (Human)</i></b>                                                               |               |                  |                                   |              |                      |
| Q6P1N0                                                                                                                                             | 2             | 2.8115           | R.YQVAAAQAK.S                     | 1            | C2D1A_HUMAN          |
| Q6P1N0                                                                                                                                             | 2             | 3.5026           | R.TLLEALEQR.M                     | 2            | C2D1A_HUMAN          |
| Q6P1N0                                                                                                                                             | 2             | 3.097            | K.LANQDEGPEDEEDEVK.K              | 1            | C2D1A_HUMAN          |
| <b><i>Coiled-coil and C2 domain-containing protein 1B - Homo sapiens (Human)</i></b>                                                               |               |                  |                                   |              |                      |
| Q5T0F9                                                                                                                                             | 3             | 5.7719           | K.GQPVDLSAMPAPEDLKPQQASQAPTAPSVIP | 2            | C2D1B_HUMAN          |

| <i>Accession No*</i>                                                                    | <i>Charge</i> | <i>XC(Max)**</i> | <i>Peptide*</i>                    | <i>TC***</i> | <i>Reference No*</i> |
|-----------------------------------------------------------------------------------------|---------------|------------------|------------------------------------|--------------|----------------------|
| Q5T0F9                                                                                  | 2             | 3.0451           | K.RPLAPQEPANR.S                    | 4            | C2D1B_HUMAN          |
| Q5T0F9                                                                                  | 3             | 4.7371           | K.GQPVDLSAM#PPAPEDLKPQQASQAPTAPSVI | 1            | C2D1B_HUMAN          |
| Q5T0F9                                                                                  | 2             | 3.6958           | K.TLESQLASVR.R                     | 5            | C2D1B_HUMAN          |
| <b><i>Coiled-coil domain-containing protein 102A - Homo sapiens (Human)</i></b>         |               |                  |                                    |              |                      |
| Q96A19                                                                                  | 2             | 2.7455           | R.RQQQNAPLFGK.I                    | 1            | C102A_HUMAN          |
| <b><i>Coiled-coil domain-containing protein 12 - Homo sapiens (Human)</i></b>           |               |                  |                                    |              |                      |
| Q8WUD4                                                                                  | 3             | 5.8233           | R.LKGQEDSLASAVDAATEQK.T            | 4            | CCD12_HUMAN          |
| <b><i>Coiled-coil domain-containing protein 124 - Homo sapiens (Human)</i></b>          |               |                  |                                    |              |                      |
| Q96CT7                                                                                  | 2             | 4.1032           | R.AAFTAFEEAQLPR.L                  | 5            | CC124_HUMAN          |
| Q96CT7                                                                                  | 1             | 2.4124           | R.VLEEGSVEAR.T                     | 1            | CC124_HUMAN          |
| Q96CT7                                                                                  | 2             | 3.0838           | R.SPDPNPM#NQR.A                    | 1            | CC124_HUMAN          |
| Q96CT7                                                                                  | 2             | 2.8193           | R.RLDQLER.K                        | 3            | CC124_HUMAN          |
| Q96CT7                                                                                  | 2             | 3.0965           | K.SHLEVPLEENVNR.R                  | 1            | CC124_HUMAN          |
| Q96CT7                                                                                  | 2             | 3.1246           | R.SPDPNPMNQR.A                     | 2            | CC124_HUMAN          |
| <b><i>Coiled-coil domain-containing protein 128 - Homo sapiens (Human)</i></b>          |               |                  |                                    |              |                      |
| Q6ZMI0                                                                                  | 2             | 5.7862           | K.AVLEPIQSTSLIGTLTR.T              | 3            | CC128_HUMAN          |
| Q6ZMI0                                                                                  | 2             | 2.799            | R.LQDELTTTKR.S                     | 1            | CC128_HUMAN          |
| <b><i>Coiled-coil domain-containing protein 16 - Homo sapiens (Human)</i></b>           |               |                  |                                    |              |                      |
| Q96NB3                                                                                  | 2             | 3.7217           | K.EASQGSSASSAPQSVK.R               | 2            | CCD16_HUMAN          |
| <b><i>Coiled-coil domain-containing protein 28A - Homo sapiens (Human)</i></b>          |               |                  |                                    |              |                      |
| Q8IWP9                                                                                  | 2             | 3.6266           | K.LHLADAQDVPNTSAS.-                | 2            | CC28A_HUMAN          |
| <b><i>Coiled-coil domain-containing protein 47 precursor - Homo sapiens (Human)</i></b> |               |                  |                                    |              |                      |
| Q96A33                                                                                  | 2             | 3.3565           | R.RLEEAALR.R                       | 2            | CCD47_HUMAN          |
| <b><i>Coiled-coil domain-containing protein 50 - Homo sapiens (Human)</i></b>           |               |                  |                                    |              |                      |
| Q8IVM0                                                                                  | 4             | 4.8297           | R.DFAVLEDHTLAHSLQEIEHHLASNVQR.N    | 1            | CCD50_HUMAN          |
| Q8IVM0                                                                                  | 2             | 4.6802           | R.KLQEEELLATQVDM#R.A               | 2            | CCD50_HUMAN          |
| Q8IVM0                                                                                  | 2             | 2.7657           | R.LVQHDLQVAK.Q                     | 1            | CCD50_HUMAN          |
| Q8IVM0                                                                                  | 2             | 3.9444           | R.AYADSYYYEDGGMKPR.V               | 2            | CCD50_HUMAN          |
| Q8IVM0                                                                                  | 2             | 3.5287           | R.AAQVAQDEEIAR.L                   | 1            | CCD50_HUMAN          |
| <b><i>Coiled-coil domain-containing protein 53 - Homo sapiens (Human)</i></b>           |               |                  |                                    |              |                      |
| Q9Y3C0                                                                                  | 2             | 3.4302           | K.MVQVGVPMVAIR.N                   | 6            | CCD53_HUMAN          |
| <b><i>Coiled-coil domain-containing protein 55 - Homo sapiens (Human)</i></b>           |               |                  |                                    |              |                      |

| <i>Accession No*</i>                                                                                 | <i>Charge</i> | <i>XC(Max)**</i> | <i>Peptide*</i>              | <i>TC***</i> | <i>Reference No*</i> |
|------------------------------------------------------------------------------------------------------|---------------|------------------|------------------------------|--------------|----------------------|
| Q9H0G5                                                                                               | 2             | 3.2573           | K.ALAEDATVYEYDSIYDEMQK.K     | 1            | CCD55_HUMAN          |
| Q9H0G5                                                                                               | 2             | 4.0578           | R.HLLNQAVGEEVVK.C            | 1            | CCD55_HUMAN          |
| Q9H0G5                                                                                               | 2             | 3.6673           | R.NQEKPSNSESLGAK.H           | 2            | CCD55_HUMAN          |
| <b><i>Coiled-coil domain-containing protein 56 - Homo sapiens (Human)</i></b>                        |               |                  |                              |              |                      |
| Q9Y2R0                                                                                               | 2             | 3.283            | K.RGEAPFAQR.I                | 5            | CCD56_HUMAN          |
| <b><i>Coiled-coil domain-containing protein 58 - Homo sapiens (Human)</i></b>                        |               |                  |                              |              |                      |
| Q4VC31                                                                                               | 2             | 3.4279           | K.QLYESLMAAHSR.D             | 2            | CCD58_HUMAN          |
| Q4VC31                                                                                               | 2             | 2.7938           | R.EKNLDDLTLK.Q               | 1            | CCD58_HUMAN          |
| Q4VC31                                                                                               | 2             | 4.4644           | R.IVHELNTTVPTASFAGK.I        | 5            | CCD58_HUMAN          |
| <b><i>Coiled-coil domain-containing protein 72 - Homo sapiens (Human)</i></b>                        |               |                  |                              |              |                      |
| Q9Y2S6                                                                                               | 3             | 3.9688           | K.AAGKGPLATGGIKK.S           | 1            | CCD72_HUMAN          |
| Q9Y2S6                                                                                               | 2             | 2.728            | K.GPLATGGIK.K                | 2            | CCD72_HUMAN          |
| <b><i>Coiled-coil domain-containing protein 8 - Homo sapiens (Human)</i></b>                         |               |                  |                              |              |                      |
| Q9H0W5                                                                                               | 2             | 3.0108           | R.APAVQGADNQR.A              | 1            | CCDC8_HUMAN          |
| Q9H0W5                                                                                               | 3             | 4.1061           | R.AGAPAEEGAEAADNQREEAADNQR.A | 1            | CCDC8_HUMAN          |
| Q9H0W5                                                                                               | 2             | 3.1871           | R.AEAPADQGSEVTDNQR.E         | 1            | CCDC8_HUMAN          |
| <b><i>Coiled-coil domain-containing protein 86 - Homo sapiens (Human)</i></b>                        |               |                  |                              |              |                      |
| Q9H6F5                                                                                               | 3             | 4.0579           | R.ALVEFESNPEETREPGSPPSVQR.A  | 1            | CCD86_HUMAN          |
| <b><i>Coiled-coil domain-containing protein 9 - Homo sapiens (Human)</i></b>                         |               |                  |                              |              |                      |
| Q9Y3X0                                                                                               | 2             | 3.6215           | K.EGAASPAPETPQPTSPETSPK.E    | 1            | CCDC9_HUMAN          |
| Q9Y3X0                                                                                               | 3             | 4.884            | R.SVEKENVAVESEKNLGPSR.R      | 1            | CCDC9_HUMAN          |
| Q9Y3X0                                                                                               | 2             | 2.8494           | R.SGPLEESER.D                | 1            | CCDC9_HUMAN          |
| Q9Y3X0                                                                                               | 2             | 4.4519           | R.SVEKENVAVESEK.N            | 2            | CCDC9_HUMAN          |
| <b><i>Coiled-coil domain-containing protein 91 - Homo sapiens (Human)</i></b>                        |               |                  |                              |              |                      |
| Q7Z6B0                                                                                               | 2             | 2.997            | K.RLDQVIR.Q                  | 1            | CCD91_HUMAN          |
| Q7Z6B0                                                                                               | 2             | 3.5367           | R.IKQDVESLMEK.H              | 2            | CCD91_HUMAN          |
| Q7Z6B0                                                                                               | 1             | 2.4912           | R.YKELQEK.H                  | 1            | CCD91_HUMAN          |
| <b><i>Coiled-coil domain-containing protein 92 - Homo sapiens (Human)</i></b>                        |               |                  |                              |              |                      |
| Q53HC0                                                                                               | 2             | 3.8283           | K.NAMITVLENTIK.E             | 2            | CCD92_HUMAN          |
| <b><i>Coiled-coil-helix-coiled-coil-helix domain-containing protein 3 - Homo sapiens (Human)</i></b> |               |                  |                              |              |                      |
| Q9NX63                                                                                               | 3             | 5.4644           | R.RVAEELALEQAKK.E            | 2            | CHCH3_HUMAN          |
| Q9NX63                                                                                               | 2             | 4.2599           | R.YSGAYGASVSDEELK.R          | 1            | CHCH3_HUMAN          |
| Q9NX63                                                                                               | 2             | 3.3913           | R.VAEELALEQAK.K              | 1            | CHCH3_HUMAN          |

| <i>Accession No*</i>                                                                                 | <i>Charge</i> | <i>XC(Max)**</i> | <i>Peptide*</i>              | <i>TC***</i> | <i>Reference No*</i> |
|------------------------------------------------------------------------------------------------------|---------------|------------------|------------------------------|--------------|----------------------|
| Q9NX63                                                                                               | 2             | 4.2069           | R.VAEELALEQAKK.E             | 1            | CHCH3_HUMAN          |
| Q9NX63                                                                                               | 1             | 2.2606           | R.VTTEQYQK.A                 | 1            | CHCH3_HUMAN          |
| Q9NX63                                                                                               | 2             | 3.0866           | K.KQDAFYK.E                  | 2            | CHCH3_HUMAN          |
| Q9NX63                                                                                               | 2             | 3.2086           | K.AAEEVEAK.F                 | 7            | CHCH3_HUMAN          |
| <b><i>Coiled-coil-helix-coiled-coil-helix domain-containing protein 6 - Homo sapiens (Human)</i></b> |               |                  |                              |              |                      |
| Q9BRQ6                                                                                               | 2             | 2.7323           | R.SGSSGGQQPSGMK.E            | 2            | CHCH6_HUMAN          |
| Q9BRQ6                                                                                               | 3             | 5.3766           | R.MKEPSSPPPAPTSSTFGLQDGNLR.A | 2            | CHCH6_HUMAN          |
| Q9BRQ6                                                                                               | 3             | 4.2638           | K.RYEQEHAAIQDK.L             | 2            | CHCH6_HUMAN          |
| <b><i>Coiled-coil-helix-coiled-coil-helix domain-containing protein 8 - Homo sapiens (Human)</i></b> |               |                  |                              |              |                      |
| Q9NYJ1                                                                                               | 2             | 4.6593           | K.KDDEEDPLDQLISR.S           | 3            | Q9NYJ1_HUMAN         |
| Q9NYJ1                                                                                               | 3             | 5.5953           | R.VKKDDEEDPLDQLISR.S         | 17           | Q9NYJ1_HUMAN         |
| Q9NYJ1                                                                                               | 2             | 3.28             | R.RQEELQR.R                  | 22           | Q9NYJ1_HUMAN         |
| <b><i>Coilin - Homo sapiens (Human)</i></b>                                                          |               |                  |                              |              |                      |
| P38432                                                                                               | 2             | 5.3468           | K.DYSLLPLLAAPQVGEK.I         | 2            | P80C_HUMAN           |
| <b><i>Cold-inducible RNA-binding protein - Homo sapiens (Human)</i></b>                              |               |                  |                              |              |                      |
| Q14011                                                                                               | 2             | 2.7212           | R.QIRVDQAGK.S                | 1            | CIRBP_HUMAN          |
| Q14011                                                                                               | 2             | 4.6461           | R.DSYDSYATHNE.-              | 4            | CIRBP_HUMAN          |
| <b><i>Collagen alpha-1(I) chain precursor - Homo sapiens (Human)</i></b>                             |               |                  |                              |              |                      |
| P02452                                                                                               | 2             | 5.0452           | R.GPPGPM#GPPGLAGPPGESGR.E    | 2            | CO1A1_HUMAN          |
| P02452                                                                                               | 2             | 3.6568           | K.GESGSPGPAGPTGAR.G          | 3            | CO1A1_HUMAN          |
| P02452                                                                                               | 3             | 5.7859           | K.SGDRGETGPAGPAGVGPVGAR.G    | 14           | CO1A1_HUMAN          |
| P02452                                                                                               | 2             | 3.3018           | R.GQAGVM#GFPGPK.G            | 14           | CO1A1_HUMAN          |
| P02452                                                                                               | 3             | 4.1573           | R.GPAGPQGPRGDKGETGEQGDR.G    | 2            | CO1A1_HUMAN          |
| P02452                                                                                               | 1             | 3.0778           | R.GPAGPQGPR.G                | 15           | CO1A1_HUMAN          |
| P02452                                                                                               | 2             | 4.9169           | R.GFSGLDGAKGDAGPAGPK.G       | 2            | CO1A1_HUMAN          |
| P02452                                                                                               | 2             | 3.2818           | K.STGGISVPGPMGSPGPR.G        | 6            | CO1A1_HUMAN          |
| P02452                                                                                               | 2             | 2.9097           | K.GEAGPQGPR.G                | 8            | CO1A1_HUMAN          |
| P02452                                                                                               | 2             | 5.62             | K.DGEAGAQQPPGPAGPAGER.G      | 8            | CO1A1_HUMAN          |
| P02452                                                                                               | 2             | 4.5337           | R.GETGPAGPAGVGPVGAR.G        | 7            | CO1A1_HUMAN          |
| P02452                                                                                               | 1             | 2.5161           | R.GFSGLDGAK.G                | 4            | CO1A1_HUMAN          |
| <b><i>Collagen alpha-1(III) chain precursor - Homo sapiens (Human)</i></b>                           |               |                  |                              |              |                      |
| P02461                                                                                               | 2             | 3.6723           | R.GPVGPSGPPGK.D              | 6            | CO3A1_HUMAN          |
| <b><i>Collagen alpha-1(V) chain precursor - Homo sapiens (Human)</i></b>                             |               |                  |                              |              |                      |

| <i>Accession No*</i>                                                                                | <i>Charge</i> | <i>XC(Max)**</i> | <i>Peptide*</i>                    | <i>TC***</i> | <i>Reference No*</i> |
|-----------------------------------------------------------------------------------------------------|---------------|------------------|------------------------------------|--------------|----------------------|
| P20908                                                                                              | 2             | 3.3334           | R.GPAGPMGLTGR.P                    | 2            | CO5A1_HUMAN          |
| P20908                                                                                              | 3             | 4.4364           | R.FGGGGDAGSKGPM#VSAQESQAQAILQQAR.L | 1            | CO5A1_HUMAN          |
| <b><i>Collagen alpha-1(VI) chain precursor - Homo sapiens (Human)</i></b>                           |               |                  |                                    |              |                      |
| P12109                                                                                              | 3             | 4.0457           | R.DAEEAISQTIDTIVDMIK.N             | 1            | CO6A1_HUMAN          |
| P12109                                                                                              | 2             | 3.3883           | R.DAEEAISQTIDTIVDM#IK.N            | 2            | CO6A1_HUMAN          |
| <b><i>Collagen alpha-1(XIV) chain precursor - Homo sapiens (Human)</i></b>                          |               |                  |                                    |              |                      |
| Q05707                                                                                              | 2             | 3.6522           | K.TNQLNLQNTATK.A                   | 2            | COEA1_HUMAN          |
| Q05707                                                                                              | 2             | 3.7402           | R.GDLQSQAMVR.S                     | 2            | COEA1_HUMAN          |
| Q05707                                                                                              | 2             | 3.2806           | R.ISNVGSNSAR.L                     | 2            | COEA1_HUMAN          |
| <b><i>Collagen alpha-1(XV) chain precursor [Contains: Endostatin - Homo sapiens (Human)]</i></b>    |               |                  |                                    |              |                      |
| P39059                                                                                              | 2             | 3.9356           | R.TADTAVTGLASPLSTGK.I              | 2            | COFA1_HUMAN          |
| P39059                                                                                              | 3             | 3.705            | R.FTGSLQQLTVHPDPR.T                | 1            | COFA1_HUMAN          |
| <b><i>Collagen alpha-1(XVI) chain precursor - Homo sapiens (Human)</i></b>                          |               |                  |                                    |              |                      |
| Q07092                                                                                              | 2             | 4.2895           | R.DTQSNELIEINPQSEK.V               | 5            | COGA1_HUMAN          |
| Q07092                                                                                              | 2             | 3.6006           | R.DGQQGQTGLR.G                     | 4            | COGA1_HUMAN          |
| <b><i>Collagen alpha-1(XVIII) chain precursor [Contains: Endostatin] - Homo sapiens (Human)</i></b> |               |                  |                                    |              |                      |
| P39060                                                                                              | 2             | 5.5061           | R.ELLREETGAALKPR.L                 | 4            | COIA1_HUMAN          |
| P39060                                                                                              | 3             | 4.7673           | R.GTDNEVAALQPPVQLHDSNPYPR.R        | 7            | COIA1_HUMAN          |
| P39060                                                                                              | 2             | 3.3777           | R.ADDILASPPR.L                     | 4            | COIA1_HUMAN          |
| P39060                                                                                              | 1             | 2.1351           | K.VQLEAR.T                         | 1            | COIA1_HUMAN          |
| <b><i>Collagen alpha-2(I) chain precursor - Homo sapiens (Human)</i></b>                            |               |                  |                                    |              |                      |
| P08123                                                                                              | 2             | 2.9167           | K.GVGLGPGPMGLM#GPR.G               | 2            | CO1A2_HUMAN          |
| P08123                                                                                              | 2             | 4.1853           | K.GVGLGPGPMGLMGPR.G                | 3            | CO1A2_HUMAN          |
| P08123                                                                                              | 2             | 3.7136           | R.GPAGPSGPAGK.D                    | 24           | CO1A2_HUMAN          |
| P08123                                                                                              | 2             | 4.3206           | R.GETGPSGPVGPAGAVGPR.G             | 7            | CO1A2_HUMAN          |
| P08123                                                                                              | 2             | 4.0122           | K.GVGLGPGPM#GLMGPR.G               | 5            | CO1A2_HUMAN          |
| P08123                                                                                              | 3             | 6.4453           | K.HGNRGETGPSGPVGPAGAVGPR.G         | 7            | CO1A2_HUMAN          |
| P08123                                                                                              | 2             | 3.6156           | R.PGPIGPAGAR.G                     | 3            | CO1A2_HUMAN          |
| P08123                                                                                              | 1             | 2.1167           | R.GVVGPQGAR.G                      | 1            | CO1A2_HUMAN          |
| P08123                                                                                              | 1             | 3.2629           | R.GPSGPQGIR.G                      | 9            | CO1A2_HUMAN          |
| P08123                                                                                              | 2             | 3.9793           | R.GPAGPSGPAGKDGR.T                 | 8            | CO1A2_HUMAN          |
| P08123                                                                                              | 2             | 4.8824           | K.NGDKGHAGLAGAR.G                  | 4            | CO1A2_HUMAN          |
| P08123                                                                                              | 2             | 5.054            | K.GEIGAVGNAGPAGPAGPR.G             | 3            | CO1A2_HUMAN          |
| P08123                                                                                              | 2             | 3.939            | K.GVGLGPGPM#GLM#GPR.G              | 5            | CO1A2_HUMAN          |



| <i>Accession No*</i>                                                                                    | <i>Charge</i> | <i>XC(Max)**</i> | <i>Peptide*</i>              | <i>TC***</i> | <i>Reference No*</i> |
|---------------------------------------------------------------------------------------------------------|---------------|------------------|------------------------------|--------------|----------------------|
| P08123                                                                                                  | 2             | 4.9014           | R.GEAGAAGPAGPAGPR.G          | 6            | CO1A2_HUMAN          |
| P08123                                                                                                  | 1             | 2.4393           | R.AGVM#GPPGSR.G              | 1            | CO1A2_HUMAN          |
| <b><i>Collagen alpha-2(IV) chain precursor [Contains: Canstatin] - Homo sapiens (Human)</i></b>         |               |                  |                              |              |                      |
| P08572                                                                                                  | 2             | 2.8662           | R.GLPGEVLGAQPGPR.G           | 1            | CO4A2_HUMAN          |
| P08572                                                                                                  | 2             | 3.6817           | R.SVSIQYLLVK.H               | 3            | CO4A2_HUMAN          |
| P08572                                                                                                  | 2             | 2.9838           | K.IAVQPGTVGPQGR.R            | 4            | CO4A2_HUMAN          |
| P08572                                                                                                  | 2             | 4.2866           | R.GLDGYQGPDPGR.G             | 20           | CO4A2_HUMAN          |
| P08572                                                                                                  | 2             | 4.9319           | R.GEQGFM#GNTGPTGAVGDR.G      | 4            | CO4A2_HUMAN          |
| P08572                                                                                                  | 2             | 3.2916           | R.GEQGFM#GNTGPTGAVGDRGPK.G   | 2            | CO4A2_HUMAN          |
| P08572                                                                                                  | 2             | 4.1104           | R.GEQGFMGNTGPTGAVGDR.G       | 2            | CO4A2_HUMAN          |
| <b><i>Collagen alpha-2(V) chain precursor - Homo sapiens (Human)</i></b>                                |               |                  |                              |              |                      |
| P05997                                                                                                  | 2             | 4.0636           | K.SGLGSQVGLM#PGSVGPVGPGR.G   | 4            | CO5A2_HUMAN          |
| <b><i>Collagen alpha-2(VI) chain precursor - Homo sapiens (Human)</i></b>                               |               |                  |                              |              |                      |
| P12110                                                                                                  | 2             | 3.2838           | K.NLQGISSFR.R                | 2            | CO6A2_HUMAN          |
| P12110                                                                                                  | 2             | 3.2958           | R.LFAVAPNQNLK.E              | 1            | CO6A2_HUMAN          |
| <b><i>Collagen alpha-3(V) chain precursor - Homo sapiens (Human)</i></b>                                |               |                  |                              |              |                      |
| P25940                                                                                                  | 2             | 3.443            | R.FISIAGLTVLGTQDLGEK.T       | 1            | CO5A3_HUMAN          |
| <b><i>Collagen alpha-3(VI) chain precursor - Homo sapiens (Human)</i></b>                               |               |                  |                              |              |                      |
| P12111                                                                                                  | 1             | 2.3421           | K.WYYDPNTK.S                 | 1            | CO6A3_HUMAN          |
| P12111                                                                                                  | 2             | 3.2935           | K.LSDAGITPLFLTR.Q            | 1            | CO6A3_HUMAN          |
| <b><i>Collagen alpha-4(IV) chain precursor - Homo sapiens (Human)</i></b>                               |               |                  |                              |              |                      |
| P53420                                                                                                  | 2             | 2.8694           | R.GPEGAM#GLPGM#R.G           | 1            | CO4A4_HUMAN          |
| <b><i>Collectrin precursor - Homo sapiens (Human)</i></b>                                               |               |                  |                              |              |                      |
| Q9HBJ8                                                                                                  | 2             | 3.5138           | R.INNAFFLNDQTLFLK.I          | 2            | TMM27_HUMAN          |
| <b><i>Complement C3 precursor [Contains: Complement C3 beta chain; Complement C3 alpha chain; C</i></b> |               |                  |                              |              |                      |
| P01024                                                                                                  | 3             | 5.5528           | R.EGVQKEDIPPADLSQVPDTESETR.I | 4            | CO3_HUMAN            |
| P01024                                                                                                  | 3             | 4.3617           | R.TKKQELSEAEQATR.T           | 2            | CO3_HUMAN            |
| P01024                                                                                                  | 2             | 4.5079           | K.EDIPPADLSQVPDTESETR.I      | 5            | CO3_HUMAN            |
| P01024                                                                                                  | 2             | 3.6829           | K.SGSDEVQVGQQR.T             | 4            | CO3_HUMAN            |
| P01024                                                                                                  | 3             | 5.3478           | K.VQLSNDFDEYIM#AIEQTIK.S     | 2            | CO3_HUMAN            |
| P01024                                                                                                  | 2             | 4.4632           | R.IPIEDGSGEVVLSR.K           | 1            | CO3_HUMAN            |
| P01024                                                                                                  | 2             | 2.8854           | K.SSLSVPYVIVPLK.T            | 1            | CO3_HUMAN            |
| P01024                                                                                                  | 2             | 2.808            | K.SDDKVTLEER.L               | 1            | CO3_HUMAN            |

| <i>Accession No*</i>                                                                                     | <i>Charge</i> | <i>XC(Max)**</i> | <i>Peptide*</i>                    | <i>TC***</i> | <i>Reference No*</i> |
|----------------------------------------------------------------------------------------------------------|---------------|------------------|------------------------------------|--------------|----------------------|
| P01024                                                                                                   | 4             | 5.62             | R.AEDLVGKSLYVSATVILHSGSDMVQAER.S   | 1            | CO3_HUMAN            |
| <b><i>Complement component 1 Q subcomponent-binding protein, mitochondrial precursor - Homo sapi</i></b> |               |                  |                                    |              |                      |
| Q07021                                                                                                   | 2             | 4.0808           | R.EVSFQSTGESEWK.D                  | 3            | C1QBP_HUMAN          |
| Q07021                                                                                                   | 2             | 3.6528           | K.VEEQEPELTSTPNFVVEVIK.N           | 1            | C1QBP_HUMAN          |
| Q07021                                                                                                   | 2             | 5.0023           | K.MSGGWELELNGTEAK.L                | 14           | C1QBP_HUMAN          |
| Q07021                                                                                                   | 2             | 5.287            | K.M#SGGWELELNGTEAK.L               | 5            | C1QBP_HUMAN          |
| Q07021                                                                                                   | 2             | 3.9424           | K.AFVDFLSDEIKEER.K                 | 2            | C1QBP_HUMAN          |
| Q07021                                                                                                   | 3             | 6.0028           | R.GVDNTFADELVELSTALEHQEYITFLEDLK.S | 2            | C1QBP_HUMAN          |
| <b><i>Complement component C9 precursor [Contains: Complement component C9a; Complement com</i></b>      |               |                  |                                    |              |                      |
| P02748                                                                                                   | 2             | 3.1366           | R.DRVVEESELAR.T                    | 1            | CO9_HUMAN            |
| P02748                                                                                                   | 2             | 2.9201           | K.TSNFNAAISLK.F                    | 1            | CO9_HUMAN            |
| <b><i>Complement factor H precursor - Homo sapiens (Human)</i></b>                                       |               |                  |                                    |              |                      |
| P08603                                                                                                   | 2             | 3.79             | K.SSNLIILEEHLK.N                   | 2            | CFAH_HUMAN           |
| <b><i>Connective tissue growth factor precursor - Homo sapiens (Human)</i></b>                           |               |                  |                                    |              |                      |
| P29279                                                                                                   | 2             | 4.0619           | R.LEDTFGPDPTMIR.A                  | 1            | CTGF_HUMAN           |
| <b><i>Copper chaperone for superoxide dismutase - Homo sapiens (Human)</i></b>                           |               |                  |                                    |              |                      |
| O14618                                                                                                   | 2             | 4.1403           | R.SLIIDEGEDDLGRGGHPLSK.I           | 1            | CCS_HUMAN            |
| O14618                                                                                                   | 2             | 3.8055           | R.SLIIDEGEDDLGR.G                  | 2            | CCS_HUMAN            |
| O14618                                                                                                   | 2             | 3.3094           | R.SAGLFQNPQ.K                      | 2            | CCS_HUMAN            |
| O14618                                                                                                   | 3             | 4.5796           | R.MEDEQLKVWDVIGR.S                 | 3            | CCS_HUMAN            |
| O14618                                                                                                   | 2             | 2.7954           | R.M#EDEQLK.V                       | 1            | CCS_HUMAN            |
| <b><i>Copper transport protein ATOX1 - Homo sapiens (Human)</i></b>                                      |               |                  |                                    |              |                      |
| O00244                                                                                                   | 2             | 3.1062           | K.YDIDLPNKK.V                      | 2            | ATOX1_HUMAN          |
| O00244                                                                                                   | 2             | 4.8051           | K.LGGVKYDIDLPNKK.V                 | 5            | ATOX1_HUMAN          |
| O00244                                                                                                   | 2             | 4.5913           | K.LGGVKYDIDLPNK.K                  | 4            | ATOX1_HUMAN          |
| O00244                                                                                                   | 2             | 3.4361           | K.TGKTVSYLGLK.-                    | 3            | ATOX1_HUMAN          |
| O00244                                                                                                   | 2             | 3.2095           | K.YDIDLPNK.K                       | 2            | ATOX1_HUMAN          |
| <b><i>Cordon-bleu protein-like 1 - Homo sapiens (Human)</i></b>                                          |               |                  |                                    |              |                      |
| Q53SF7                                                                                                   | 2             | 4.7389           | R.AGSLQLSSMSAGNSSLR.R              | 2            | COBL1_HUMAN          |
| Q53SF7                                                                                                   | 2             | 3.5511           | K.PSSFFLQM#QK.R                    | 2            | COBL1_HUMAN          |
| Q53SF7                                                                                                   | 2             | 3.7515           | R.QSSLTFQSSDPEQMR.Q                | 1            | COBL1_HUMAN          |
| Q53SF7                                                                                                   | 3             | 3.9299           | R.TESPSASALVQPPANTEEGKTHSVNK.F     | 1            | COBL1_HUMAN          |
| Q53SF7                                                                                                   | 2             | 4.8668           | R.TESPSASALVQPPANTEEGK.T           | 4            | COBL1_HUMAN          |

| <i>Accession No*</i> | <i>Charge</i> | <i>XC(Max)**</i> | <i>Peptide*</i>                     | <i>TC***</i> | <i>Reference No*</i> |
|----------------------|---------------|------------------|-------------------------------------|--------------|----------------------|
| Q53SF7               | 3             | 5.2178           | K.TFGAPRPYSSSGPSPFALAVVK.R          | 2            | COBL1_HUMAN          |
| Q53SF7               | 3             | 4.9317           | R.SNTISKPYISNTLPSDAPK.K             | 6            | COBL1_HUMAN          |
| Q53SF7               | 2             | 3.4811           | R.LSHSM#SPDAQDGH.-                  | 2            | COBL1_HUMAN          |
| Q53SF7               | 2             | 4.6644           | R.DQTASAPATPLVNH.H                  | 4            | COBL1_HUMAN          |
| Q53SF7               | 2             | 3.2275           | K.VEAENISPK.S                       | 1            | COBL1_HUMAN          |
| Q53SF7               | 2             | 3.3464           | R.IDKNSTASYLK.N                     | 2            | COBL1_HUMAN          |
| Q53SF7               | 3             | 4.4995           | K.SLEISKDWQSETIEYKDDQDM#HALGK.K     | 1            | COBL1_HUMAN          |
| Q53SF7               | 2             | 3.5422           | K.ENHLAASSVPDQK.L                   | 2            | COBL1_HUMAN          |
| Q53SF7               | 2             | 3.7173           | R.LSHSMSPDAQDGH.-                   | 4            | COBL1_HUMAN          |
| Q53SF7               | 3             | 6.2197           | K.SLEISKDWQSETIEYKDDQDMHALGK.K      | 1            | COBL1_HUMAN          |
| Q53SF7               | 4             | 6.1956           | K.NNNIDMEVERPSNSEAHETDTAISYKENHLAAS | 2            | COBL1_HUMAN          |
| Q53SF7               | 3             | 4.8971           | K.TDDDVGQAPAEASPPPIAPKPV TIPASQVSTQ | 1            | COBL1_HUMAN          |
| Q53SF7               | 2             | 3.8551           | K.TDDDVGQAPAEASPPPIAPK.P            | 1            | COBL1_HUMAN          |
| Q53SF7               | 2             | 4.1139           | K.PSSFFLQMVK.R                      | 4            | COBL1_HUMAN          |
| Q53SF7               | 2             | 3.6415           | K.SQDIPFVSTDIINTLK.N                | 1            | COBL1_HUMAN          |
| Q53SF7               | 2             | 3.8544           | K.EAERDMLPSPEQTLSPLSK.M             | 2            | COBL1_HUMAN          |
| Q53SF7               | 2             | 4.3983           | K.PVTIPASQVSTQNLK.T                 | 4            | COBL1_HUMAN          |
| Q53SF7               | 2             | 2.7333           | K.TEINVEGVAK.N                      | 1            | COBL1_HUMAN          |
| Q53SF7               | 1             | 2.3144           | K.NYPLYR.Q                          | 2            | COBL1_HUMAN          |
| Q53SF7               | 1             | 2.3181           | K.NSTASYLK.N                        | 1            | COBL1_HUMAN          |
| Q53SF7               | 2             | 3.0115           | K.IPPHQSDENSR.V                     | 3            | COBL1_HUMAN          |
| Q53SF7               | 3             | 4.0549           | K.ETAIQTEDSAISESPEEPLPNLKPKNLR.T    | 2            | COBL1_HUMAN          |
| Q53SF7               | 3             | 3.9076           | K.ERTESPSASALVQPPANTEEGK.T          | 2            | COBL1_HUMAN          |

***Coronin-1A - Homo sapiens (Human)***

|        |   |        |                      |   |             |
|--------|---|--------|----------------------|---|-------------|
| P31146 | 2 | 4.4396 | R.AAPEASGTPSSDAVSR.L | 2 | COR1A_HUMAN |
|--------|---|--------|----------------------|---|-------------|

***Coronin-1B - Homo sapiens (Human)***

|        |   |        |                     |   |             |
|--------|---|--------|---------------------|---|-------------|
| Q9BR76 | 2 | 5.5894 | R.AGEAGKLEEVMQELR.A | 5 | COR1B_HUMAN |
|--------|---|--------|---------------------|---|-------------|

***Coronin-1C - Homo sapiens (Human)***

|        |   |        |                         |   |             |
|--------|---|--------|-------------------------|---|-------------|
| Q9ULV4 | 2 | 3.9193 | R.ISKLEQQMAK.I          | 6 | COR1C_HUMAN |
| Q9ULV4 | 2 | 2.884  | K.HGYIPGK.N             | 1 | COR1C_HUMAN |
| Q9ULV4 | 3 | 5.3066 | K.KTTDTASVQNEAKLDEILK.E | 2 | COR1C_HUMAN |
| Q9ULV4 | 2 | 4.1861 | K.TTDTASVQNEAK.L        | 1 | COR1C_HUMAN |
| Q9ULV4 | 2 | 5.0438 | K.KTTDTASVQNEAK.L       | 3 | COR1C_HUMAN |

***COX16-like protein C14orf112, mitochondrial precursor - Homo sapiens (Human)***

|        |   |        |                    |   |             |
|--------|---|--------|--------------------|---|-------------|
| Q9P0S2 | 3 | 4.0578 | R.GPRPWEDPDLLQGR.N | 2 | CN112_HUMAN |
|--------|---|--------|--------------------|---|-------------|

Accession No\* Charge XC(Max)\*\* Peptide\* TC\*\*\* Reference No\*

***Coxsackievirus and adenovirus receptor precursor - Homo sapiens (Human)***

P78310 2 2.9954 K.TQYNQVPSSEDFER.T 2 CXAR\_HUMAN

***Craniofacial development protein 1 - Homo sapiens (Human)***

Q9UEE9 2 3.1973 R.KAQSIPAR.K 2 CFDP1\_HUMAN  
 Q9UEE9 2 3.4131 K.EDEVDGEEQTQK.T 2 CFDP1\_HUMAN  
 Q9UEE9 2 3.2543 K.EKPQANVPSALPSLPAGSGLK.R 2 CFDP1\_HUMAN  
 Q9UEE9 3 4.7439 K.LDWESFKEEEGIGEELAIHNR.G 2 CFDP1\_HUMAN  
 Q9UEE9 2 2.8386 K.EDELWASFLNDVGP.K.S 1 CFDP1\_HUMAN  
 Q9UEE9 2 3.5286 K.AEELEKPKETEK.V 1 CFDP1\_HUMAN  
 Q9UEE9 2 3.7933 K.VDFDFAGEEVR.V 2 CFDP1\_HUMAN

***Creatine kinase B-type - Homo sapiens (Human)***

P12277 2 4.132 R.LEQGQAIDDLMPAQK.- 2 KCRB\_HUMAN  
 P12277 2 3.1279 K.LAVEALSSLDGDLAGR.Y 1 KCRB\_HUMAN

***CREB-regulated transcription coactivator 1 - Homo sapiens (Human)***

Q6UUUV9 2 2.809 K.SQYLQLGPSR.G 1 CRTC1\_HUMAN

***Crk-like protein - Homo sapiens (Human)***

P46109 3 4.116 R.FKIGDQEFDHLPALLEFYK.I 1 CRKL\_HUMAN  
 P46109 3 5.0218 K.KGEILVIIKPEEQWWSAR.N 1 CRKL\_HUMAN  
 P46109 3 4.2431 R.KGLFPFTHVK.I 2 CRKL\_HUMAN  
 P46109 3 4.2647 K.IGDQEFDHLPALLEFYK.I 1 CRKL\_HUMAN  
 P46109 2 2.9748 R.VGMIPVPYVEK.L 1 CRKL\_HUMAN  
 P46109 2 3.8794 K.IHYLDTTTLIEPAPR.Y 2 CRKL\_HUMAN  
 P46109 3 4.5377 R.YPSPPMGSVSAPNLPTAEDNLEYVR.T 2 CRKL\_HUMAN  
 P46109 2 3.9725 R.MNINGQWEGEVNGR.K 2 CRKL\_HUMAN  
 P46109 2 3.8244 K.TALALEVGDIVK.V 2 CRKL\_HUMAN

***Crumbs homolog 2 precursor - Homo sapiens (Human)***

Q5IJ48 2 5.172 R.GLASDLGFLQGPGAVR.I 2 CRUM2\_HUMAN  
 Q5IJ48 2 3.8005 R.AAAGALEGVWLAVR.N 2 CRUM2\_HUMAN  
 Q5IJ48 2 3.205 R.VALGGLPLPLAR.P 1 CRUM2\_HUMAN  
 Q5IJ48 2 4.9107 R.LLAADSQPWGGPFR.G 3 CRUM2\_HUMAN

***Cryptochrome-2 - Homo sapiens (Human)***

Q49AN0 2 3.8744 R.VAELPTPELPSKDA.- 2 CRY2\_HUMAN

***CTTNBP2 N-terminal-like protein - Homo sapiens (Human)***

| <i>Accession No*</i>                                                                 | <i>Charge</i> | <i>XC(Max)**</i> | <i>Peptide*</i>                    | <i>TC***</i> | <i>Reference No*</i> |
|--------------------------------------------------------------------------------------|---------------|------------------|------------------------------------|--------------|----------------------|
| Q9P2B4                                                                               | 2             | 2.8201           | R.GDTSHSPTPGK.V                    | 3            | CT2NL_HUMAN          |
| Q9P2B4                                                                               | 2             | 4.4104           | R.DLSPTLIDNSAAK.Q                  | 3            | CT2NL_HUMAN          |
| <b><i>Cubilin precursor - Homo sapiens (Human)</i></b>                               |               |                  |                                    |              |                      |
| O60494                                                                               | 2             | 2.8566           | R.SSGDSMFIK.L                      | 1            | CUBN_HUMAN           |
| O60494                                                                               | 2             | 3.0233           | R.DGETLLGK.V                       | 1            | CUBN_HUMAN           |
| O60494                                                                               | 2             | 4.9643           | R.DFVEILDGGHEDAPLR.G               | 3            | CUBN_HUMAN           |
| O60494                                                                               | 3             | 4.2809           | R.VPGQSGVVESIGHPTLPYR.D            | 4            | CUBN_HUMAN           |
| O60494                                                                               | 2             | 3.1949           | R.SPFFPNVYPGER.T                   | 3            | CUBN_HUMAN           |
| O60494                                                                               | 2             | 2.795            | R.SDNSPTHVGFKA.A                   | 2            | CUBN_HUMAN           |
| O60494                                                                               | 2             | 3.0891           | R.NDFLEVR.N                        | 2            | CUBN_HUMAN           |
| O60494                                                                               | 2             | 3.428            | K.SITNSVWIR.F                      | 2            | CUBN_HUMAN           |
| O60494                                                                               | 2             | 2.9043           | R.FTSDSSVTR.A                      | 1            | CUBN_HUMAN           |
| O60494                                                                               | 2             | 3.7787           | K.LRTDEGQQGR.G                     | 7            | CUBN_HUMAN           |
| O60494                                                                               | 2             | 4.1917           | K.LQVLLLDGTVGR.R                   | 2            | CUBN_HUMAN           |
| O60494                                                                               | 2             | 5.1627           | R.SPENPMQVSSTGNELAIR.F             | 3            | CUBN_HUMAN           |
| O60494                                                                               | 2             | 5.281            | R.SPENPM#QVSSTGNELAIR.F            | 5            | CUBN_HUMAN           |
| O60494                                                                               | 2             | 3.7217           | R.FISDGSSTGTFQATFMK.I              | 1            | CUBN_HUMAN           |
| O60494                                                                               | 2             | 3.6119           | R.RITLMFNLR.L                      | 1            | CUBN_HUMAN           |
| O60494                                                                               | 2             | 3.9761           | R.VGDADGPLMWR.L                    | 5            | CUBN_HUMAN           |
| O60494                                                                               | 2             | 3.7592           | R.FVTDGSVTASGFR.L                  | 2            | CUBN_HUMAN           |
| O60494                                                                               | 2             | 2.773            | K.TDSFQTA.G                        | 1            | CUBN_HUMAN           |
| O60494                                                                               | 2             | 4.4003           | R.DGVDS DAPILSK.F                  | 5            | CUBN_HUMAN           |
| O60494                                                                               | 2             | 4.0963           | R.KFQGLQQTVDKK.V                   | 3            | CUBN_HUMAN           |
| O60494                                                                               | 2             | 5.2992           | R.EQLANPIVSSGNSLFLR.F              | 7            | CUBN_HUMAN           |
| O60494                                                                               | 2             | 3.0256           | R.STGEYMFIR.F                      | 3            | CUBN_HUMAN           |
| O60494                                                                               | 2             | 3.9465           | R.KFQGLQQTVDK.K                    | 4            | CUBN_HUMAN           |
| <b><i>CUE domain-containing protein 1 - Homo sapiens (Human)</i></b>                 |               |                  |                                    |              |                      |
| Q9NWM3                                                                               | 2             | 2.7322           | R.IALFLQNEEFM#K.E                  | 1            | CUED1_HUMAN          |
| <b><i>Cutaneous T-cell lymphoma-associated antigen 5 - Homo sapiens (Human)</i></b>  |               |                  |                                    |              |                      |
| O15320                                                                               | 2             | 4.8952           | K.DALNENSQLQESQK.Q                 | 1            | CTGE5_HUMAN          |
| <b><i>Cyclic AMP-dependent transcription factor ATF-1 - Homo sapiens (Human)</i></b> |               |                  |                                    |              |                      |
| P18846                                                                               | 2             | 2.9155           | K.DLSSDTR.G                        | 3            | ATF1_HUMAN           |
| <b><i>Cyclin G-associated kinase - Homo sapiens (Human)</i></b>                      |               |                  |                                    |              |                      |
| O14976                                                                               | 3             | 4.9976           | K.ESESALM#EDRDESEVSDEGGSPISSEGQEPR | 2            | GAK_HUMAN            |

| <i>Accession No*</i>                                                      | <i>Charge</i> | <i>XC(Max)**</i> | <i>Peptide*</i>                   | <i>TC***</i> | <i>Reference No*</i> |
|---------------------------------------------------------------------------|---------------|------------------|-----------------------------------|--------------|----------------------|
| O14976                                                                    | 3             | 5.1378           | K.ESESALMEDRDESEVSDEGGSPISSEGEPR. | 2            | GAK_HUMAN            |
| O14976                                                                    | 3             | 6.0552           | R.QPGSTAQYDAGAGSPEAEPTDSDSPPSSAD  | 1            | GAK_HUMAN            |
| <b><i>Cyclin-dependent kinase inhibitor 1B - Homo sapiens (Human)</i></b> |               |                  |                                   |              |                      |
| P46527                                                                    | 2             | 2.8494           | R.DMEEASQR.K                      | 2            | CDN1B_HUMAN          |
| P46527                                                                    | 3             | 5.5628           | R.ANRTEENVSDGSPNAGSVEQTPK.K       | 2            | CDN1B_HUMAN          |
| P46527                                                                    | 3             | 4.2487           | R.TEENVSDGSPNAGSVEQTPK.K          | 6            | CDN1B_HUMAN          |
| P46527                                                                    | 2             | 3.6128           | R.NLFGPVDHEELTR.D                 | 2            | CDN1B_HUMAN          |
| <b><i>Cyclin-dependent kinase-like 5 - Homo sapiens (Human)</i></b>       |               |                  |                                   |              |                      |
| O76039                                                                    | 2             | 3.6663           | K.TYQASSQPGSTSK.D                 | 1            | CDKL5_HUMAN          |
| <b><i>Cystatin-B - Homo sapiens (Human)</i></b>                           |               |                  |                                   |              |                      |
| P04080                                                                    | 2             | 2.8292           | K.AKHDELTYF.-                     | 3            | CYTB_HUMAN           |
| P04080                                                                    | 3             | 4.7554           | R.VFQSLPHENKPLTLSNYQTNK.A         | 9            | CYTB_HUMAN           |
| P04080                                                                    | 2             | 4.4429           | K.SQVVAGTNYFIK.V                  | 6            | CYTB_HUMAN           |
| <b><i>Cystatin-C precursor - Homo sapiens (Human)</i></b>                 |               |                  |                                   |              |                      |
| P01034                                                                    | 2             | 3.6624           | R.LVGGPMDASVEEEGV.R               | 2            | CYTC_HUMAN           |
| P01034                                                                    | 2             | 3.6702           | R.ALDFAVGEYNK.A                   | 1            | CYTC_HUMAN           |
| P01034                                                                    | 2             | 2.9161           | R.LVGGPMDASVEEEGVRR.A             | 1            | CYTC_HUMAN           |
| <b><i>Cystatin-M precursor - Homo sapiens (Human)</i></b>                 |               |                  |                                   |              |                      |
| Q15828                                                                    | 2             | 3.2138           | R.DLSPDDPQVQK.A                   | 1            | CYTM_HUMAN           |
| <b><i>Cysteine and glycine-rich protein 1 - Homo sapiens (Human)</i></b>  |               |                  |                                   |              |                      |
| P21291                                                                    | 2             | 4.7333           | K.GFGFGQGAGALVHSE.-               | 5            | CSRP1_HUMAN          |
| <b><i>Cysteine and glycine-rich protein 2 - Homo sapiens (Human)</i></b>  |               |                  |                                   |              |                      |
| Q16527                                                                    | 2             | 3.5111           | K.SLESTTLTEK.E                    | 2            | CSRP2_HUMAN          |
| Q16527                                                                    | 2             | 4.0506           | K.GFGYGQGAGALVHAQ.-               | 1            | CSRP2_HUMAN          |
| <b><i>Cysteine-rich protein 1 - Homo sapiens (Human)</i></b>              |               |                  |                                   |              |                      |
| P50238                                                                    | 1             | 2.2554           | K.EVYFAER.V                       | 1            | CRIP1_HUMAN          |
| <b><i>Cysteine-rich protein 2 - Homo sapiens (Human)</i></b>              |               |                  |                                   |              |                      |
| P52943                                                                    | 2             | 2.9344           | K.KVYFAEK.V                       | 1            | CRIP2_HUMAN          |
| P52943                                                                    | 2             | 5.9824           | K.PLAEGPQVTGPIEVPAAR.A            | 4            | CRIP2_HUMAN          |
| P52943                                                                    | 1             | 2.4122           | K.VYFAEK.V                        | 1            | CRIP2_HUMAN          |
| P52943                                                                    | 1             | 2.2293           | K.TVYFAEK.V                       | 1            | CRIP2_HUMAN          |
| P52943                                                                    | 2             | 4.9521           | K.GVNTGAVGSYIYDRDPEGK.V           | 5            | CRIP2_HUMAN          |

| <i>Accession No*</i>                                                                                         | <i>Charge</i> | <i>XC(Max)**</i> | <i>Peptide*</i>                   | <i>TC***</i> | <i>Reference No*</i> |
|--------------------------------------------------------------------------------------------------------------|---------------|------------------|-----------------------------------|--------------|----------------------|
| <b><i>Cysteine-rich with EGF-like domain protein 1 precursor - Homo sapiens (Human)</i></b>                  |               |                  |                                   |              |                      |
| Q96HD1                                                                                                       | 2             | 4.1907           | R.DNFGGGNTAWEEENLSK.Y             | 1            | CREL1_HUMAN          |
| <b><i>Cysteine-rich with EGF-like domain protein 2 precursor - Homo sapiens (Human)</i></b>                  |               |                  |                                   |              |                      |
| Q6UXH1                                                                                                       | 3             | 3.8987           | R.GLVDFKNQGMVDTAKK.N              | 1            | CREL2_HUMAN          |
| <b><i>Cystin-1 - Homo sapiens (Human)</i></b>                                                                |               |                  |                                   |              |                      |
| Q717R9                                                                                                       | 2             | 5.3412           | R.SPESLPAGPGAAALEGGTR.R           | 1            | CYS1_HUMAN           |
| <b><i>Cytochrome b-245 light chain - Homo sapiens (Human)</i></b>                                            |               |                  |                                   |              |                      |
| P13498                                                                                                       | 3             | 4.5273           | R.KKPSEEEAAAAAGPPGGPQVNPVPTDEVV.- | 1            | CY24A_HUMAN          |
| <b><i>Cytochrome b5 - Homo sapiens (Human)</i></b>                                                           |               |                  |                                   |              |                      |
| P00167                                                                                                       | 2             | 3.3527           | K.STWLILHHK.V                     | 2            | CYB5_HUMAN           |
| P00167                                                                                                       | 3             | 5.567            | K.FLEEHPPGEEVLRQAGGDATENFEDVGHST  | 2            | CYB5_HUMAN           |
| P00167                                                                                                       | 2             | 4.2585           | R.EQAGGDATENFEDVGHSTDAR.E         | 2            | CYB5_HUMAN           |
| P00167                                                                                                       | 2             | 4.9613           | K.TFIIGELHPDDRPK.L                | 4            | CYB5_HUMAN           |
| P00167                                                                                                       | 2             | 4.3321           | K.FLEEHPPGEEVLR.E                 | 4            | CYB5_HUMAN           |
| P00167                                                                                                       | 2             | 3.15             | K.YYTLEEIQK.H                     | 6            | CYB5_HUMAN           |
| <b><i>Cytochrome c - Homo sapiens (Human)</i></b>                                                            |               |                  |                                   |              |                      |
| P99999                                                                                                       | 3             | 4.0893           | K.NKGIIWGEDTLMEYLENPKK.Y          | 1            | CYC_HUMAN            |
| P99999                                                                                                       | 2             | 4.6487           | K.TGQAPGYSYTAANKNK.G              | 2            | CYC_HUMAN            |
| P99999                                                                                                       | 2             | 4.3055           | K.TGQAPGYSYTAANK.N                | 6            | CYC_HUMAN            |
| P99999                                                                                                       | 3             | 5.6522           | R.KTGQAPGYSYTAANKNK.G             | 4            | CYC_HUMAN            |
| <b><i>Cytochrome c oxidase assembly protein COX19 - Homo sapiens (Human)</i></b>                             |               |                  |                                   |              |                      |
| Q49B96                                                                                                       | 2             | 2.7423           | R.KLMLQEPEK.L                     | 1            | COX19_HUMAN          |
| Q49B96                                                                                                       | 2             | 2.9857           | R.KLM#LQEPEK.L                    | 2            | COX19_HUMAN          |
| Q49B96                                                                                                       | 2             | 2.9505           | K.LGFGDLTSGK.S                    | 1            | COX19_HUMAN          |
| <b><i>Cytochrome c oxidase polypeptide VIc precursor - Homo sapiens (Human)</i></b>                          |               |                  |                                   |              |                      |
| P09669                                                                                                       | 2             | 3.1925           | K.AGIFQSVK.-                      | 1            | COX6C_HUMAN          |
| <b><i>Cytochrome c oxidase polypeptide VIIa-liver/heart, mitochondrial precursor - Homo sapiens (Hum</i></b> |               |                  |                                   |              |                      |
| P14406                                                                                                       | 2             | 2.9727           | K.GGVADALLYR.A                    | 1            | CX7A2_HUMAN          |
| P14406                                                                                                       | 3             | 4.4405           | K.QKLFQEDDEIPLYLK.G               | 2            | CX7A2_HUMAN          |
| <b><i>Cytochrome c oxidase subunit 4 isoform 1, mitochondrial precursor - Homo sapiens (Human)</i></b>       |               |                  |                                   |              |                      |
| P13073                                                                                                       | 2             | 2.7544           | K.VNPIQGLASK.W                    | 1            | COX41_HUMAN          |
| <b><i>Cytochrome c oxidase subunit 5A, mitochondrial precursor - Homo sapiens (Human)</i></b>                |               |                  |                                   |              |                      |

| <i>Accession No*</i> | <i>Charge</i> | <i>XC(Max)**</i> | <i>Peptide*</i>        | <i>TC***</i> | <i>Reference No*</i> |
|----------------------|---------------|------------------|------------------------|--------------|----------------------|
| P20674               | 1             | 3.1958           | R.ILEVVKDK.A           | 7            | COX5A_HUMAN          |
| P20674               | 2             | 4.2974           | R.KGINTLVITYDMVPEPK.I  | 5            | COX5A_HUMAN          |
| P20674               | 2             | 4.9454           | K.GINTLVITYDM#VPEPK.I  | 7            | COX5A_HUMAN          |
| P20674               | 2             | 4.1242           | K.GINTLVITYDMVPEPK.I   | 9            | COX5A_HUMAN          |
| P20674               | 1             | 2.1803           | K.IIDAALR.A            | 3            | COX5A_HUMAN          |
| P20674               | 3             | 4.7146           | R.KGINTLVITYDM#VPEPK.I | 4            | COX5A_HUMAN          |
| P20674               | 2             | 3.7219           | R.WVTYFNKPIDAWELR.K    | 2            | COX5A_HUMAN          |
| P20674               | 2             | 4.1544           | R.WVTYFNKPIDAWELRK.G   | 2            | COX5A_HUMAN          |

***Cytochrome c oxidase subunit 5B, mitochondrial precursor - Homo sapiens (Human)***

|        |   |        |                           |    |             |
|--------|---|--------|---------------------------|----|-------------|
| P10606 | 2 | 3.8681 | R.SMASGGGVPTDEEQATGLER.E  | 4  | COX5B_HUMAN |
| P10606 | 1 | 2.1348 | R.EIM#LAAK.K              | 1  | COX5B_HUMAN |
| P10606 | 2 | 5.5673 | R.SM#ASGGGVPTDEEQATGLER.E | 5  | COX5B_HUMAN |
| P10606 | 2 | 2.8098 | R.EDPNLVPSISNK.R          | 1  | COX5B_HUMAN |
| P10606 | 2 | 4.0365 | K.KGLDPYNVLAPK.G          | 11 | COX5B_HUMAN |
| P10606 | 2 | 3.642  | K.GLDPYNVLAPK.G           | 2  | COX5B_HUMAN |
| P10606 | 2 | 4.1678 | K.GASGTREDPNLVPSISNK.R    | 3  | COX5B_HUMAN |
| P10606 | 1 | 2.7042 | R.EIMLAAK.K               | 10 | COX5B_HUMAN |

***Cytochrome c oxidase subunit VIb isoform 1 - Homo sapiens (Human)***

|        |   |        |                   |   |             |
|--------|---|--------|-------------------|---|-------------|
| P14854 | 2 | 2.9631 | K.TAPFDSRFPNQNR.N | 1 | CX6B1_HUMAN |
| P14854 | 2 | 3.5626 | R.AEGTFPGKI.-     | 6 | CX6B1_HUMAN |
| P14854 | 2 | 2.7132 | R.AEGTFPGK.I      | 1 | CX6B1_HUMAN |

***Cytochrome P450 1A2 - Homo sapiens (Human)***

|        |   |        |                      |   |             |
|--------|---|--------|----------------------|---|-------------|
| P05177 | 2 | 3.0796 | R.FLTADGTAINKPLSEK.M | 2 | CP1A2_HUMAN |
|--------|---|--------|----------------------|---|-------------|

***Cytoplasmic dynein 1 intermediate chain 2 - Homo sapiens (Human)***

|        |   |        |                          |   |             |
|--------|---|--------|--------------------------|---|-------------|
| Q13409 | 2 | 3.0595 | K.EAVAPVQEEEDLEK.R       | 2 | DC112_HUMAN |
| Q13409 | 2 | 4.5972 | K.SVSTPSEAGSQDSDGAVGSR.T | 4 | DC112_HUMAN |
| Q13409 | 2 | 3.7437 | K.EAVAPVQEEEDLEK.K       | 4 | DC112_HUMAN |
| Q13409 | 2 | 2.7735 | R.ADAEEEEATR.I           | 1 | DC112_HUMAN |
| Q13409 | 3 | 4.2422 | R.TLAEINANRADAEEEEATR.I  | 1 | DC112_HUMAN |

***Cytoplasmic dynein 1 light intermediate chain 1 - Homo sapiens (Human)***

|        |   |        |                                  |   |             |
|--------|---|--------|----------------------------------|---|-------------|
| Q9Y6G9 | 2 | 3.6729 | K.TGSPGGPGVSGGSPAGGAGGGSSGLPSTK. | 1 | DC1L1_HUMAN |
| Q9Y6G9 | 3 | 5.1382 | K.AGATSEGVLANFFNSLLSK.K          | 3 | DC1L1_HUMAN |
| Q9Y6G9 | 2 | 4.697  | R.KPVTVSPTTPTSPTEGEAS.-          | 7 | DC1L1_HUMAN |

***Cytoplasmic dynein 1 light intermediate chain 2 - Homo sapiens (Human)***



| <i>Accession No*</i>                                                                       | <i>Charge</i> | <i>XC(Max)**</i> | <i>Peptide*</i>                    | <i>TC***</i> | <i>Reference No*</i> |
|--------------------------------------------------------------------------------------------|---------------|------------------|------------------------------------|--------------|----------------------|
| O43237                                                                                     | 2             | 3.4338           | K.TGSPGSPGAGGVQSTAKK.S             | 1            | DC1L2_HUMAN          |
| O43237                                                                                     | 2             | 3.7549           | K.TGSPGSPGAGGVQSTAK.K              | 4            | DC1L2_HUMAN          |
| O43237                                                                                     | 3             | 5.2194           | K.KTGSPGSPGAGGVQSTAK.K             | 4            | DC1L2_HUMAN          |
| O43237                                                                                     | 2             | 4.3148           | R.KPDSM#VTNSSTENEA.-               | 6            | DC1L2_HUMAN          |
| O43237                                                                                     | 2             | 4.0422           | R.KPDSMVTNSSTENEA.-                | 8            | DC1L2_HUMAN          |
| O43237                                                                                     | 2             | 3.0846           | R.GGPASVPSSSPGTSVK.K               | 2            | DC1L2_HUMAN          |
| O43237                                                                                     | 2             | 4.3493           | K.TVLSNVQEELDR.M                   | 3            | DC1L2_HUMAN          |
| <b><i>Cytoplasmic polyadenylation element-binding protein 4 - Homo sapiens (Human)</i></b> |               |                  |                                    |              |                      |
| Q17RY0                                                                                     | 2             | 3.4275           | K.SQQQEQQDPLEK.Q                   | 3            | CPEB4_HUMAN          |
| Q17RY0                                                                                     | 2             | 3.6487           | K.QQLSPSPGQEAGILPETEK.A            | 1            | CPEB4_HUMAN          |
| <b><i>Cytoplasmic protein NCK1 - Homo sapiens (Human)</i></b>                              |               |                  |                                    |              |                      |
| P16333                                                                                     | 2             | 3.0776           | K.TGFVPSNYVER.K                    | 1            | NCK1_HUMAN           |
| <b><i>Cytoplasmic protein NCK2 - Homo sapiens (Human)</i></b>                              |               |                  |                                    |              |                      |
| O43639                                                                                     | 2             | 3.4112           | R.IYDLNIPAFVK.F                    | 2            | NCK2_HUMAN           |
| O43639                                                                                     | 2             | 3.144            | R.DASPTPSTDAEYPANGSGADR.I          | 1            | NCK2_HUMAN           |
| O43639                                                                                     | 2             | 2.9877           | K.FAYVAEREDELSLVK.G                | 1            | NCK2_HUMAN           |
| O43639                                                                                     | 3             | 6.2767           | K.NYVVVLSDGPALHPAHAPQISYTGPSSSGR.F | 1            | NCK2_HUMAN           |
| <b><i>Cytoskeleton-associated protein 4 - Homo sapiens (Human)</i></b>                     |               |                  |                                    |              |                      |
| Q07065                                                                                     | 3             | 5.469            | K.GAHPSSGADDVAK.K                  | 9            | CKAP4_HUMAN          |
| <b><i>Cytosol aminopeptidase - Homo sapiens (Human)</i></b>                                |               |                  |                                    |              |                      |
| P28838                                                                                     | 2             | 3.487            | K.GVLFASGQNLAR.Q                   | 2            | AMPL_HUMAN           |
| P28838                                                                                     | 3             | 4.3027           | R.TFYGLHQDFPSVVLVGLGK.K            | 2            | AMPL_HUMAN           |
| P28838                                                                                     | 2             | 2.7173           | R.QLMETPANEMTPTR.F                 | 1            | AMPL_HUMAN           |
| <b><i>Cytosolic non-specific dipeptidase - Homo sapiens (Human)</i></b>                    |               |                  |                                    |              |                      |
| Q96KP4                                                                                     | 2             | 4.3898           | K.LPDGSEIPLPPILLGR.L               | 2            | CNDP2_HUMAN          |
| Q96KP4                                                                                     | 3             | 4.4191           | K.QKLPDGSEIPLPPILLGR.L             | 1            | CNDP2_HUMAN          |
| <b><i>Cytospin-A - Homo sapiens (Human)</i></b>                                            |               |                  |                                    |              |                      |
| Q69YQ0                                                                                     | 2             | 2.9902           | K.TPPAAAVSPMQR.H                   | 2            | CYTSA_HUMAN          |
| Q69YQ0                                                                                     | 2             | 3.537            | K.TPPAAAVSPM#QR.H                  | 2            | CYTSA_HUMAN          |
| <b><i>DDI1 homolog 2 - Homo sapiens (Human)</i></b>                                        |               |                  |                                    |              |                      |
| Q5TDH0                                                                                     | 2             | 3.9925           | R.IDFSSIAVPGTSSPR.Q                | 3            | DDI2_HUMAN           |
| Q5TDH0                                                                                     | 2             | 3.7509           | R.NPPLAEALLSGDLEK.F                | 2            | DDI2_HUMAN           |
| Q5TDH0                                                                                     | 2             | 3.2029           | R.VLVEQQQDR.A                      | 1            | DDI2_HUMAN           |

Accession No\* Charge XC(Max)\*\* Peptide\* TC\*\*\* Reference No\*

***D-dopachrome decarboxylase - Homo sapiens (Human)***

|        |   |        |                 |    |            |
|--------|---|--------|-----------------|----|------------|
| P30046 | 2 | 4.1401 | R.FFPLESWQIGK.I | 11 | DOPD_HUMAN |
| P30046 | 2 | 4.1811 | R.SHSAHFFFLTK.E | 3  | DOPD_HUMAN |

***Death-associated protein 1 - Homo sapiens (Human)***

|        |   |        |              |   |            |
|--------|---|--------|--------------|---|------------|
| P51397 | 2 | 2.8619 | R.TQHIQQPR.K | 4 | DAP1_HUMAN |
|--------|---|--------|--------------|---|------------|

***Death-inducer obliterator 1 - Homo sapiens (Human)***

|        |   |        |                                |   |             |
|--------|---|--------|--------------------------------|---|-------------|
| Q9BTC0 | 3 | 4.8886 | R.NSVERPAEPVAGAATPSLVEQQK.M    | 2 | DIDO1_HUMAN |
| Q9BTC0 | 2 | 3.3966 | K.STAPLLDVFSSMLK.D             | 2 | DIDO1_HUMAN |
| Q9BTC0 | 2 | 2.751  | K.VGGSQPPFQGQR.E               | 1 | DIDO1_HUMAN |
| Q9BTC0 | 3 | 3.7493 | R.APEAAAAEREEVAYDPEDETILEEAK.V | 1 | DIDO1_HUMAN |
| Q9BTC0 | 3 | 4.9864 | K.ALEEEEDDRPYDPEEEYDPER.A      | 1 | DIDO1_HUMAN |
| Q9BTC0 | 3 | 5.0291 | K.SFDPSAREPPGSTAGLPQEPK.T      | 2 | DIDO1_HUMAN |
| Q9BTC0 | 2 | 2.7086 | R.QAGPAPAAAATAASK.K            | 2 | DIDO1_HUMAN |
| Q9BTC0 | 2 | 3.3878 | R.VEQFLTAR.R                   | 1 | DIDO1_HUMAN |

***Decorin precursor - Homo sapiens (Human)***

|        |   |        |                    |   |            |
|--------|---|--------|--------------------|---|------------|
| P07585 | 2 | 2.7119 | K.DLPPDTLLDLQNNK.I | 1 | PGS2_HUMAN |
|--------|---|--------|--------------------|---|------------|

***Dedicator of cytokinesis protein 1 - Homo sapiens (Human)***

|        |   |        |                                  |   |             |
|--------|---|--------|----------------------------------|---|-------------|
| Q14185 | 3 | 4.1408 | R.RFSVSPSSPSSQQTPPPVTPR.A        | 1 | DOCK1_HUMAN |
| Q14185 | 3 | 5.1463 | K.GSVADYGNLMENQDLLGSPTPPPPPHQR.H | 3 | DOCK1_HUMAN |
| Q14185 | 2 | 3.896  | R.KQTSVDSGIVQ.-                  | 4 | DOCK1_HUMAN |

***Dedicator of cytokinesis protein 5 - Homo sapiens (Human)***

|        |   |        |                            |   |             |
|--------|---|--------|----------------------------|---|-------------|
| Q9H7D0 | 2 | 3.7973 | R.KSGIPTSEPGSQ.-           | 2 | DOCK5_HUMAN |
| Q9H7D0 | 3 | 4.8228 | R.LSPFHGSSPPQSTPLSPPLTPK.A | 1 | DOCK5_HUMAN |

***Dedicator of cytokinesis protein 6 - Homo sapiens (Human)***

|        |   |        |                           |   |             |
|--------|---|--------|---------------------------|---|-------------|
| Q96HP0 | 2 | 3.9807 | K.SISSNPDLAVAPGSVDDEVSR.I | 1 | DOCK6_HUMAN |
|--------|---|--------|---------------------------|---|-------------|

***Delta-1-pyrroline-5-carboxylate dehydrogenase, mitochondrial precursor - Homo sapiens (Human)***

|        |   |        |                         |   |             |
|--------|---|--------|-------------------------|---|-------------|
| P30038 | 2 | 3.147  | R.WTSPQVIK.E            | 2 | AL4A1_HUMAN |
| P30038 | 2 | 3.3326 | K.VGDPAEDFGTFFSAVIDAK.S | 1 | AL4A1_HUMAN |
| P30038 | 2 | 4.192  | R.NAAGNFYINDK.S         | 3 | AL4A1_HUMAN |
| P30038 | 2 | 3.6392 | K.STGSIVGQQPFGGAR.A     | 2 | AL4A1_HUMAN |

***Dematin - Homo sapiens (Human)***

|        |   |        |                                   |   |            |
|--------|---|--------|-----------------------------------|---|------------|
| Q08495 | 2 | 3.0543 | R.DSSVPGSPSSIVAK.M                | 2 | DEMA_HUMAN |
| Q08495 | 4 | 5.7109 | K.AILDIERPDLM#IYEPHFTYSLEHVELPR.S | 1 | DEMA_HUMAN |

| <i>Accession No*</i>                                                                            | <i>Charge</i> | <i>XC(Max)**</i> | <i>Peptide*</i>                    | <i>TC***</i> | <i>Reference No*</i> |
|-------------------------------------------------------------------------------------------------|---------------|------------------|------------------------------------|--------------|----------------------|
| Q08495                                                                                          | 3             | 4.2316           | K.MDNQVLGYKDAAIPK.D                | 3            | DEMA_HUMAN           |
| Q08495                                                                                          | 2             | 3.127            | K.MDNQVLGYK.D                      | 3            | DEMA_HUMAN           |
| <b><i>Dendrin - Homo sapiens (Human)</i></b>                                                    |               |                  |                                    |              |                      |
| O94850                                                                                          | 3             | 3.8257           | R.DAPTQPGSPEHQALGPAASGAQGR.A       | 1            | DEND_HUMAN           |
| <b><i>DENN domain-containing protein 4C - Homo sapiens (Human)</i></b>                          |               |                  |                                    |              |                      |
| Q5VZ89                                                                                          | 2             | 4.7148           | R.NLADEIESYMNLK.S                  | 3            | DEN4C_HUMAN          |
| Q5VZ89                                                                                          | 2             | 3.7051           | R.NLADEIESYM#NLK.S                 | 1            | DEN4C_HUMAN          |
| Q5VZ89                                                                                          | 3             | 4.4921           | R.SSLPLDHGSPAQENPESEK.S            | 1            | DEN4C_HUMAN          |
| Q5VZ89                                                                                          | 2             | 3.3297           | K.SNFLPLLNIEFK.D                   | 2            | DEN4C_HUMAN          |
| Q5VZ89                                                                                          | 2             | 3.1012           | R.SSPVPEMLEESQELLEPVDDVPK.T        | 1            | DEN4C_HUMAN          |
| Q5VZ89                                                                                          | 3             | 6.058            | K.HNQIITEETGSAVEPSDEIKR.A          | 2            | DEN4C_HUMAN          |
| <b><i>Density-regulated protein - Homo sapiens (Human)</i></b>                                  |               |                  |                                    |              |                      |
| O43583                                                                                          | 3             | 4.1174           | K.WPEVDDDSIEDLGEVKK.-              | 1            | DENR_HUMAN           |
| <b><i>Deoxyhypusine hydroxylase - Homo sapiens (Human)</i></b>                                  |               |                  |                                    |              |                      |
| Q9BU89                                                                                          | 2             | 3.1544           | R.AFYADGLEQLR.G                    | 2            | DOHH_HUMAN           |
| <b><i>Deoxynucleotidyltransferase terminal-interacting protein 2 - Homo sapiens (Human)</i></b> |               |                  |                                    |              |                      |
| Q5TFJ4                                                                                          | 3             | 4.4561           | K.NLSELQDTSLQQLVSR.H               | 2            | Q5TFJ4_HUMAN         |
| <b><i>Deoxyribonuclease-2-alpha precursor - Homo sapiens (Human)</i></b>                        |               |                  |                                    |              |                      |
| O00115                                                                                          | 2             | 4.1658           | R.ALINSPEGAVGR.S                   | 6            | DNS2A_HUMAN          |
| O00115                                                                                          | 2             | 3.6545           | K.YLDESSGGWR.D                     | 3            | DNS2A_HUMAN          |
| <b><i>DERPC - Homo sapiens (Human)</i></b>                                                      |               |                  |                                    |              |                      |
| Q71E72                                                                                          | 2             | 2.8082           | R.GGGPMGPGSGPNLR.A                 | 2            | Q71E72_HUMAN         |
| <b><i>Desmoglein-2 precursor - Homo sapiens (Human)</i></b>                                     |               |                  |                                    |              |                      |
| Q14126                                                                                          | 3             | 4.9642           | K.SLQEANAIEKVTQIEVTER.S            | 2            | DSG2_HUMAN           |
| Q14126                                                                                          | 2             | 4.3308           | R.ILDVNDNIPVVENK.V                 | 2            | DSG2_HUMAN           |
| Q14126                                                                                          | 2             | 3.895            | R.VYAPASTLVDQPYANEGTVVVTER.V       | 1            | DSG2_HUMAN           |
| Q14126                                                                                          | 3             | 3.7445           | K.VLDINDNEPVFTQDVFGSVEELSAHTLVMK.I | 1            | DSG2_HUMAN           |
| Q14126                                                                                          | 2             | 4.1375           | K.AASYTEEDENHTAK.D                 | 4            | DSG2_HUMAN           |
| Q14126                                                                                          | 2             | 3.6778           | K.GITEPPFGIFVFNK.D                 | 2            | DSG2_HUMAN           |
| <b><i>Desmoplakin - Homo sapiens (Human)</i></b>                                                |               |                  |                                    |              |                      |
| P15924                                                                                          | 2             | 2.7694           | R.KGFIDGR.A                        | 2            | DESP_HUMAN           |
| P15924                                                                                          | 3             | 5.8896           | K.LSLQDAVSQGVIDQDMATR.L            | 1            | DESP_HUMAN           |
| P15924                                                                                          | 3             | 3.7874           | R.SSSFSDTLEESSPIAAIFDTENLEK.I      | 1            | DESP_HUMAN           |

| <i>Accession No*</i> | <i>Charge</i> | <i>XC(Max)**</i> | <i>Peptide*</i>            | <i>TC***</i> | <i>Reference No*</i> |
|----------------------|---------------|------------------|----------------------------|--------------|----------------------|
| P15924               | 2             | 2.9931           | K.GFFDPNTEENLTYLQLK.E      | 1            | DESP_HUMAN           |
| P15924               | 2             | 2.9102           | R.GYFNEELSEILSDPSDDTK.G    | 1            | DESP_HUMAN           |
| P15924               | 2             | 2.8638           | K.ISITEGIER.G              | 1            | DESP_HUMAN           |
| P15924               | 3             | 3.9643           | R.AVTGYNDPETGNIISLFQAMNK.E | 1            | DESP_HUMAN           |
| P15924               | 2             | 3.4865           | R.GIVDSITGQR.L             | 1            | DESP_HUMAN           |

***Desmuslin - Homo sapiens (Human)***

|        |   |        |                           |   |           |
|--------|---|--------|---------------------------|---|-----------|
| O15061 | 2 | 3.8648 | R.SPAPGSPDEEGGAEAPAAGIR.F | 1 | DMN_HUMAN |
| O15061 | 2 | 2.8839 | R.YSWQDEIVQGTR.R          | 2 | DMN_HUMAN |
| O15061 | 2 | 3.3175 | R.EVPVYIGEDSTIAR.E        | 2 | DMN_HUMAN |
| O15061 | 2 | 3.5126 | R.MREELSALTR.E            | 2 | DMN_HUMAN |
| O15061 | 2 | 2.8173 | K.QFTQSPETEASADSFDPDK.V   | 1 | DMN_HUMAN |
| O15061 | 2 | 3.4015 | R.DKVAAGASESTR.S          | 2 | DMN_HUMAN |

***Deubiquitinating protein VCIP135 - Homo sapiens (Human)***

|        |   |        |                      |   |             |
|--------|---|--------|----------------------|---|-------------|
| Q96JH7 | 3 | 4.2502 | R.KHNTGTDFSNSSTK.T   | 1 | VCIP1_HUMAN |
| Q96JH7 | 2 | 3.4071 | R.DQSTEQSPSDLPQRK.T  | 2 | VCIP1_HUMAN |
| Q96JH7 | 2 | 4.5344 | R.DQSTEQSPSDLPQR.K   | 8 | VCIP1_HUMAN |
| Q96JH7 | 2 | 4.2999 | K.TEPSVFTASSNSELIR.I | 2 | VCIP1_HUMAN |

***Development and differentiation-enhancing factor 2 - Homo sapiens (Human)***

|        |   |        |                       |   |             |
|--------|---|--------|-----------------------|---|-------------|
| O43150 | 2 | 3.2388 | K.GAFPVSFVHFIAD.-     | 3 | DDEF2_HUMAN |
| O43150 | 2 | 3.7963 | R.VTSTNPLTPTPPPPVAK.T | 4 | DDEF2_HUMAN |
| O43150 | 1 | 2.1201 | R.DAANLAK.E           | 1 | DDEF2_HUMAN |
| O43150 | 2 | 2.9309 | K.TNSVSVDGGSR.Q       | 2 | DDEF2_HUMAN |

***Dihydrodipicolinate synthase-like, mitochondrial precursor - Homo sapiens (Human)***

|        |   |        |                         |   |             |
|--------|---|--------|-------------------------|---|-------------|
| Q86XE5 | 2 | 3.7446 | R.APLQELSPAEEALR.M      | 2 | DAPAL_HUMAN |
| Q86XE5 | 2 | 4.3579 | R.GFVVQGSNGEFPFLTSSER.L | 1 | DAPAL_HUMAN |

***Dihydrolipoyl dehydrogenase, mitochondrial precursor - Homo sapiens (Human)***

|        |   |        |                   |   |            |
|--------|---|--------|-------------------|---|------------|
| P09622 | 2 | 3.053  | K.TNADTDGMVK.I    | 1 | DLDH_HUMAN |
| P09622 | 2 | 3.0436 | K.TNADTDGM#VK.I   | 6 | DLDH_HUMAN |
| P09622 | 3 | 4.0327 | K.SEEQLKEEGIEYK.V | 1 | DLDH_HUMAN |
| P09622 | 3 | 4.3808 | K.VGKFPFAANSR.A   | 2 | DLDH_HUMAN |
| P09622 | 1 | 3.2625 | R.EANLAASFGK.S    | 6 | DLDH_HUMAN |
| P09622 | 2 | 3.0225 | K.ADGGTQVIDTK.N   | 2 | DLDH_HUMAN |
| P09622 | 2 | 3.0383 | K.ALTGGIAHLFK.Q   | 2 | DLDH_HUMAN |

***Dihydropyrimidinase - Homo sapiens (Human)***

| <i>Accession No*</i> | <i>Charge</i> | <i>XC(Max)**</i> | <i>Peptide*</i>          | <i>TC***</i> | <i>Reference No*</i> |
|----------------------|---------------|------------------|--------------------------|--------------|----------------------|
| Q14117               | 2             | 3.3936           | K.GGSLIEAFETWR.S         | 2            | DPYS_HUMAN           |
| Q14117               | 2             | 3.2028           | R.VTKEDATAGTR.K          | 3            | DPYS_HUMAN           |
| Q14117               | 3             | 4.2025           | R.VTKEDATAGTRK.Q         | 1            | DPYS_HUMAN           |
| Q14117               | 3             | 4.5715           | R.VVNDDFSEVADVLVEDGVVR.A | 1            | DPYS_HUMAN           |
| Q14117               | 2             | 3.3259           | R.IAVGSDADIVIWDPK.G      | 1            | DPYS_HUMAN           |

***Dihydropyrimidinase-related protein 2 - Homo sapiens (Human)***

|        |   |        |                         |   |             |
|--------|---|--------|-------------------------|---|-------------|
| Q16555 | 3 | 4.8504 | R.NLHQSGFSLSGAQIDNIPR.R | 4 | DPYL2_HUMAN |
|--------|---|--------|-------------------------|---|-------------|

***Dihydroxyacetone kinase - Homo sapiens (Human)***

|        |   |        |                           |   |           |
|--------|---|--------|---------------------------|---|-----------|
| Q3LXA3 | 2 | 2.8553 | R.VAPAEPQEAPDSTAAGGSASK.R | 1 | DAK_HUMAN |
| Q3LXA3 | 2 | 3.4651 | K.SPGADLLQVLTK.A          | 1 | DAK_HUMAN |
| Q3LXA3 | 2 | 4.2861 | R.LEQPDPGAVAAAAILR.A      | 6 | DAK_HUMAN |
| Q3LXA3 | 2 | 3.0361 | K.SAEAAAATK.N             | 2 | DAK_HUMAN |

***DIP2B protein - Homo sapiens (Human)***

|        |   |        |                        |   |              |
|--------|---|--------|------------------------|---|--------------|
| Q6B011 | 2 | 3.7836 | R.SDIHTEAVQAALAK.H     | 2 | Q6B011_HUMAN |
| Q6B011 | 3 | 4.1121 | R.YRSDIHTEAVQAALAK.H   | 1 | Q6B011_HUMAN |
| Q6B011 | 2 | 4.2337 | K.LLSPYSPQTQETDSAVQK.E | 4 | Q6B011_HUMAN |
| Q6B011 | 2 | 3.7877 | R.NQTPAPSAAQTSAPSK.Y   | 3 | Q6B011_HUMAN |
| Q6B011 | 2 | 4.6277 | R.GLEPSPAAVAALPPEVR.A  | 4 | Q6B011_HUMAN |

***Dipeptidase 1 precursor - Homo sapiens (Human)***

|        |   |        |                             |   |             |
|--------|---|--------|-----------------------------|---|-------------|
| P16444 | 2 | 3.1992 | K.GALADNLLR.V               | 4 | DPEP1_HUMAN |
| P16444 | 2 | 3.0055 | R.ALYQLGMR.Y                | 1 | DPEP1_HUMAN |
| P16444 | 2 | 4.3325 | R.AVGFGGDFDGVPR.V           | 4 | DPEP1_HUMAN |
| P16444 | 3 | 3.8886 | R.DSPVIDGHNDLPWQLLDM#FNNR.L | 1 | DPEP1_HUMAN |
| P16444 | 2 | 3.3188 | R.TLEQMDVVHR.M              | 2 | DPEP1_HUMAN |
| P16444 | 3 | 5.1151 | R.VPEGLEDVSKYPDLIAELLR.R    | 2 | DPEP1_HUMAN |

***Dipeptidyl peptidase 4 - Homo sapiens (Human)***

|        |   |        |                     |   |            |
|--------|---|--------|---------------------|---|------------|
| P27487 | 3 | 4.0339 | R.HSYTASYDIYDLNKR.Q | 1 | DPP4_HUMAN |
| P27487 | 2 | 3.0919 | R.WEYYDSVYTER.Y     | 2 | DPP4_HUMAN |
| P27487 | 2 | 2.9239 | K.IISNEEGYR.H       | 1 | DPP4_HUMAN |
| P27487 | 2 | 3.6728 | R.VLEDNSALDK.M      | 4 | DPP4_HUMAN |
| P27487 | 2 | 2.9564 | K.MLQNVQMPK.K       | 1 | DPP4_HUMAN |
| P27487 | 2 | 3.3798 | K.LAYVWNNDIYVK.I    | 1 | DPP4_HUMAN |

***Dipeptidyl-peptidase 2 precursor - Homo sapiens (Human)***

|        |   |        |                          |   |            |
|--------|---|--------|--------------------------|---|------------|
| Q9UHL4 | 2 | 3.5083 | R.AASNIIFSNGLDPWAGGGIR.R | 1 | DPP2_HUMAN |
|--------|---|--------|--------------------------|---|------------|

*Accession No\* Charge XC(Max)\*\* Peptide\* TC\*\*\* Reference No\**

***Disabled homolog 2 - Homo sapiens (Human)***

|        |   |        |                                     |    |            |
|--------|---|--------|-------------------------------------|----|------------|
| P98082 | 2 | 5.347  | K.DSFGSSQASVASSQPVSSEMYR.D          | 11 | DAB2_HUMAN |
| P98082 | 2 | 3.4595 | K.VGIPQENADHDDFDANQLLNK.I           | 2  | DAB2_HUMAN |
| P98082 | 2 | 3.8778 | K.TGVIEHEHPVNK.I                    | 4  | DAB2_HUMAN |
| P98082 | 3 | 4.2936 | K.TGQQAELVVDLKDLFQVIYNVK.K          | 1  | DAB2_HUMAN |
| P98082 | 3 | 4.7598 | R.TGKQEAQAGPWPFSSSQTPAVR.T          | 2  | DAB2_HUMAN |
| P98082 | 3 | 5.2946 | R.AGPPKDISSDAFTALDPLGDKEIK.D        | 1  | DAB2_HUMAN |
| P98082 | 2 | 4.5268 | K.DLFQVIYNVK.K                      | 7  | DAB2_HUMAN |
| P98082 | 2 | 4.517  | K.LIGIDVDPARGDK.M                   | 3  | DAB2_HUMAN |
| P98082 | 2 | 3.5822 | K.INEPPKPAPR.Q                      | 6  | DAB2_HUMAN |
| P98082 | 3 | 5.543  | K.DSFGSSQASVASSQPVSSEM#YRDPFGNPFA.- | 1  | DAB2_HUMAN |
| P98082 | 2 | 4.5467 | K.TGQQAELVVDLK.D                    | 4  | DAB2_HUMAN |
| P98082 | 2 | 4.3083 | K.DSFGSSQASVASSQPVSSEM#YR.D         | 5  | DAB2_HUMAN |
| P98082 | 2 | 4.4183 | K.DISSDAFTALDPLGDKEIK.D             | 6  | DAB2_HUMAN |
| P98082 | 2 | 2.8347 | K.LKGMAAAGR.S                       | 1  | DAB2_HUMAN |
| P98082 | 2 | 4.3337 | K.DISSDAFTALDPLGDKEIKDVK.E          | 4  | DAB2_HUMAN |
| P98082 | 2 | 2.8875 | K.SSPNPFVGSPPK.G                    | 1  | DAB2_HUMAN |
| P98082 | 2 | 3.6065 | K.STDNAFENPFFK.D                    | 4  | DAB2_HUMAN |
| P98082 | 2 | 3.5628 | K.TDEYLLAR.F                        | 3  | DAB2_HUMAN |
| P98082 | 2 | 3.2378 | K.AVENGSEALM#ILDDQTNK.L             | 1  | DAB2_HUMAN |
| P98082 | 2 | 3.038  | R.IWVNISLSGIK.I                     | 2  | DAB2_HUMAN |
| P98082 | 2 | 3.8893 | K.LIGIDVDPARG                       | 4  | DAB2_HUMAN |

***Disabled homolog 2-interacting protein - Homo sapiens (Human)***

|        |   |        |                              |   |             |
|--------|---|--------|------------------------------|---|-------------|
| Q5VWQ8 | 3 | 5.4471 | R.RIDQPPPPPPPPAPR.G          | 3 | DAB2P_HUMAN |
| Q5VWQ8 | 3 | 4.2628 | R.GLGDGSEGHSSLSHNSSEELAAAK.L | 1 | DAB2P_HUMAN |
| Q5VWQ8 | 2 | 4.682  | K.LGSFSTAAELAR.R             | 5 | DAB2P_HUMAN |
| Q5VWQ8 | 2 | 2.8949 | K.LVLEYQAR.L                 | 1 | DAB2P_HUMAN |

***Discoidin, CUB and LCCL domain-containing protein 2 precursor - Homo sapiens (Human)***

|        |   |        |                                 |   |             |
|--------|---|--------|---------------------------------|---|-------------|
| Q96PD2 | 3 | 4.3783 | K.AGKPLPAPDELVYQVPQSTQEVSGAGR.D | 2 | DCBD2_HUMAN |
|--------|---|--------|---------------------------------|---|-------------|

***Disks large homolog 1 - Homo sapiens (Human)***

|        |   |        |                                     |   |            |
|--------|---|--------|-------------------------------------|---|------------|
| Q12959 | 3 | 4.1123 | R.GQEEYVLSYEPVNNQEVNYTRPVIIIGPM#K.D | 1 | DLG1_HUMAN |
| Q12959 | 2 | 3.177  | K.NAGQAVTIVAQYRPEEYSR.F             | 1 | DLG1_HUMAN |
| Q12959 | 2 | 3.0915 | K.DSGLPSQGLNFK.F                    | 1 | DLG1_HUMAN |
| Q12959 | 2 | 2.8581 | K.AVLGDDEITREPR.K                   | 1 | DLG1_HUMAN |
| Q12959 | 2 | 3.2864 | R.DKGEIPDDMGSK.G                    | 2 | DLG1_HUMAN |

| <i>Accession No*</i>                                                             | <i>Charge</i> | <i>XC(Max)**</i> | <i>Peptide*</i>                   | <i>TC***</i> | <i>Reference No*</i> |
|----------------------------------------------------------------------------------|---------------|------------------|-----------------------------------|--------------|----------------------|
| <b><i>DNA fragmentation factor subunit alpha - Homo sapiens (Human)</i></b>      |               |                  |                                   |              |                      |
| O00273                                                                           | 2             | 4.0281           | R.LQH TLQQVLDQR.E                 | 2            | DFFA_HUMAN           |
| O00273                                                                           | 2             | 2.9259           | K.EGSLLSKQEESK.A                  | 2            | DFFA_HUMAN           |
| O00273                                                                           | 2             | 4.5331           | K.QLLQLYLQALEK.E                  | 2            | DFFA_HUMAN           |
| O00273                                                                           | 2             | 2.987            | K.FVALASNEK.W                     | 4            | DFFA_HUMAN           |
| O00273                                                                           | 2             | 5.3553           | R.ETSSDVALASHILTALR.E             | 1            | DFFA_HUMAN           |
| O00273                                                                           | 3             | 4.6961           | K.QLLQLYLQALEKEGSLLSK.Q           | 2            | DFFA_HUMAN           |
| O00273                                                                           | 2             | 4.7575           | K.AAFGEEVDAVDTGISR.E              | 2            | DFFA_HUMAN           |
| O00273                                                                           | 2             | 3.5394           | R.LQH TLQQVLDQREEVR.Q             | 2            | DFFA_HUMAN           |
| <b><i>DNA ligase 1 - Homo sapiens (Human)</i></b>                                |               |                  |                                   |              |                      |
| P18858                                                                           | 2             | 4.0974           | R.VLGSEGE EEEDEALSPAK.G           | 3            | DNL1_HUMAN           |
| P18858                                                                           | 2             | 2.9205           | K.AETPTESVSEPEVATK.Q              | 1            | DNL1_HUMAN           |
| <b><i>DNA polymerase subunit delta 3 - Homo sapiens (Human)</i></b>              |               |                  |                                   |              |                      |
| Q15054                                                                           | 2             | 3.2073           | K.EVTNASAAGNK.A                   | 1            | DPOD3_HUMAN          |
| Q15054                                                                           | 2             | 4.3572           | K.IVEQPTVSVTEPK.L                 | 3            | DPOD3_HUMAN          |
| <b><i>DNA topoisomerase 1 - Homo sapiens (Human)</i></b>                         |               |                  |                                   |              |                      |
| P11387                                                                           | 2             | 3.722            | R.DEDDADYKPK.K                    | 6            | TOP1_HUMAN           |
| P11387                                                                           | 2             | 3.1999           | R.KLEEEEDGK.L                     | 2            | TOP1_HUMAN           |
| P11387                                                                           | 2             | 4.4937           | R.KLEEEEDGK LK.K                  | 5            | TOP1_HUMAN           |
| <b><i>DNA topoisomerase 2-beta - Homo sapiens (Human)</i></b>                    |               |                  |                                   |              |                      |
| Q02880                                                                           | 3             | 3.8862           | K.KTSFDQSDVDIFPSDFPTEPPSLPR.T     | 1            | TOP2B_HUMAN          |
| <b><i>DNA-(apurinic or apyrimidinic site) lyase - Homo sapiens (Human)</i></b>   |               |                  |                                   |              |                      |
| P27695                                                                           | 3             | 4.5191           | K.KGAVAEDGDEL RTEPEAK.K           | 5            | APEX1_HUMAN          |
| <b><i>DNA-binding protein A - Homo sapiens (Human)</i></b>                       |               |                  |                                   |              |                      |
| P16989                                                                           | 4             | 7.2897           | K.SPVGSGAPQAAAPAPAAHVAGNPGGDAAPAA | 2            | DBPA_HUMAN           |
| P16989                                                                           | 3             | 5.3713           | R.PAPAVGEAEDKENQQATSGPNQPSVR.R    | 3            | DBPA_HUMAN           |
| <b><i>DNA-directed RNA polymerase - Homo sapiens (Human)</i></b>                 |               |                  |                                   |              |                      |
| Q0VG05                                                                           | 2             | 2.7845           | R.EILMVASANIK.T                   | 1            | Q0VG05_HUMAN         |
| <b><i>DNA-directed RNA polymerase I subunit RPA34 - Homo sapiens (Human)</i></b> |               |                  |                                   |              |                      |
| O15446                                                                           | 3             | 4.7979           | R.GHTVTEPIQPLEPELPGEQPEAR.A       | 1            | RPA34_HUMAN          |
| <b><i>DNA-directed RNA polymerase II subunit RPB1 - Homo sapiens (Human)</i></b> |               |                  |                                   |              |                      |
| P24928                                                                           | 2             | 4.1726           | K.YSPTSPTYSPTSPVYTPTSPK.Y         | 3            | RPB1_HUMAN           |

| <i>Accession No*</i>                                                                            | <i>Charge</i> | <i>XC(Max)**</i> | <i>Peptide*</i>                  | <i>TC***</i> | <i>Reference No*</i> |
|-------------------------------------------------------------------------------------------------|---------------|------------------|----------------------------------|--------------|----------------------|
| P24928                                                                                          | 2             | 3.3506           | K.YTPTSPSYSPSSPEYTPSPK.Y         | 2            | RPB1_HUMAN           |
| <b><i>DNA-directed RNA polymerase II subunit RPB9 - Homo sapiens (Human)</i></b>                |               |                  |                                  |              |                      |
| P36954                                                                                          | 2             | 3.2852           | K.EAVFFQSHSAR.A                  | 2            | RPB9_HUMAN           |
| <b><i>DnaJ homolog subfamily A member 3, mitochondrial precursor - Homo sapiens (Human)</i></b> |               |                  |                                  |              |                      |
| Q96EY1                                                                                          | 2             | 2.7384           | K.FSQLAEAYEVLSDDEVK.R            | 1            | DNJA3_HUMAN          |
| <b><i>DnaJ homolog subfamily B member 1 - Homo sapiens (Human)</i></b>                          |               |                  |                                  |              |                      |
| P25685                                                                                          | 2             | 3.3889           | R.EIFDRYGEEGLK.G                 | 1            | DNJB1_HUMAN          |
| P25685                                                                                          | 2             | 3.224            | K.DYYQTLGLAR.G                   | 1            | DNJB1_HUMAN          |
| P25685                                                                                          | 2             | 5.5227           | K.FKEIAEAYDVLSDPR.K              | 3            | DNJB1_HUMAN          |
| P25685                                                                                          | 2             | 3.0436           | R.GASDEEIKR.A                    | 2            | DNJB1_HUMAN          |
| P25685                                                                                          | 2             | 3.6933           | R.NPFDTFFGQR.N                   | 3            | DNJB1_HUMAN          |
| P25685                                                                                          | 2             | 3.5729           | K.EIAEAYDVLSDPR.K                | 2            | DNJB1_HUMAN          |
| <b><i>DnaJ homolog subfamily B member 11 precursor - Homo sapiens (Human)</i></b>               |               |                  |                                  |              |                      |
| Q9UBS4                                                                                          | 2             | 3.9742           | K.FQDLGAAYEVLSDSEK.R             | 2            | DJB11_HUMAN          |
| <b><i>DnaJ homolog subfamily B member 14 - Homo sapiens (Human)</i></b>                         |               |                  |                                  |              |                      |
| Q8TBM8                                                                                          | 2             | 3.0912           | K.NYYEVLGVTK.D                   | 1            | DJB14_HUMAN          |
| Q8TBM8                                                                                          | 2             | 2.7983           | K.DAGDEDLKK.A                    | 1            | DJB14_HUMAN          |
| Q8TBM8                                                                                          | 2             | 3.7699           | K.IGNAYAVLSNPEK.R                | 2            | DJB14_HUMAN          |
| <b><i>DnaJ homolog subfamily B member 2 - Homo sapiens (Human)</i></b>                          |               |                  |                                  |              |                      |
| P25686                                                                                          | 2             | 3.0776           | R.RIMENGQER.V                    | 1            | DNJB2_HUMAN          |
| P25686                                                                                          | 2             | 3.5387           | R.AEAGSGGPGFTFTFR.S              | 2            | DNJB2_HUMAN          |
| <b><i>DnaJ homolog subfamily C member 1 - Homo sapiens (Human)</i></b>                          |               |                  |                                  |              |                      |
| Q96KC8                                                                                          | 2             | 3.0372           | R.LLEATAKPEPEEK.S                | 1            | DNJC1_HUMAN          |
| Q96KC8                                                                                          | 2             | 3.1414           | R.SAEEPWTQNQK.L                  | 1            | DNJC1_HUMAN          |
| <b><i>DnaJ homolog subfamily C member 12 - Homo sapiens (Human)</i></b>                         |               |                  |                                  |              |                      |
| Q9UKB3                                                                                          | 2             | 3.3023           | R.KKEELASTAEK.T                  | 2            | DJC12_HUMAN          |
| Q9UKB3                                                                                          | 2             | 4.3005           | R.SQMSMPFQQWEALNDSVK.T           | 2            | DJC12_HUMAN          |
| <b><i>DnaJ homolog subfamily C member 17 - Homo sapiens (Human)</i></b>                         |               |                  |                                  |              |                      |
| Q9NVM6                                                                                          | 2             | 3.4484           | R.QAQAESEEEEEESR.S               | 2            | DJC17_HUMAN          |
| Q9NVM6                                                                                          | 3             | 3.725            | R.AAELFHQLSQALEVLTDAAR.A         | 1            | DJC17_HUMAN          |
| <b><i>DnaJ homolog subfamily C member 8 - Homo sapiens (Human)</i></b>                          |               |                  |                                  |              |                      |
| O75937                                                                                          | 3             | 5.6151           | R.LTRPGSSYFNLNPFVQLIDPEVTDEEIK.K | 1            | DNJC8_HUMAN          |



| <i>Accession No*</i>                                                                       | <i>Charge</i> | <i>XC(Max)**</i> | <i>Peptide*</i>          | <i>TC***</i> | <i>Reference No*</i> |
|--------------------------------------------------------------------------------------------|---------------|------------------|--------------------------|--------------|----------------------|
| O75937                                                                                     | 3             | 4.2451           | R.ALDVIQAGKEYVEHTVK.E    | 3            | DNJC8_HUMAN          |
| O75937                                                                                     | 2             | 2.9257           | R.ALDVIQAGK.E            | 2            | DNJC8_HUMAN          |
| O75937                                                                                     | 2             | 2.9468           | K.LLLDQEQK.K             | 1            | DNJC8_HUMAN          |
| O75937                                                                                     | 3             | 4.5572           | K.KEGKPTIVEEDDPELFFK.Q   | 1            | DNJC8_HUMAN          |
| O75937                                                                                     | 1             | 2.7512           | K.AFEAVDK.A              | 4            | DNJC8_HUMAN          |
| O75937                                                                                     | 1             | 2.1003           | R.DSVLTSK.N              | 1            | DNJC8_HUMAN          |
| O75937                                                                                     | 2             | 3.7294           | K.EGKPTIVEEDDPELFFK.Q    | 3            | DNJC8_HUMAN          |
| <b><i>DnaJ homolog subfamily C member 9 - Homo sapiens (Human)</i></b>                     |               |                  |                          |              |                      |
| Q8WXX5                                                                                     | 2             | 3.408            | K.ISLEDIQAFEK.T          | 2            | DNJC9_HUMAN          |
| <b><i>DNA-repair protein complementing XP-C cells - Homo sapiens (Human)</i></b>           |               |                  |                          |              |                      |
| Q01831                                                                                     | 3             | 5.8691           | R.REEEEEDAFEDEKPPK.K     | 2            | XPC_HUMAN            |
| <b><i>DNA-repair protein XRCC1 - Homo sapiens (Human)</i></b>                              |               |                  |                          |              |                      |
| P18887                                                                                     | 2             | 3.3954           | R.AIGSTSKPQESPK.G        | 2            | XRCC1_HUMAN          |
| <b><i>DNA-repair protein XRCC4 - Homo sapiens (Human)</i></b>                              |               |                  |                          |              |                      |
| Q13426                                                                                     | 2             | 2.8321           | K.MAPQENQLQEK.E          | 2            | XRCC4_HUMAN          |
| <b><i>Doublecortin domain-containing protein 2 - Homo sapiens (Human)</i></b>              |               |                  |                          |              |                      |
| Q9UHG0                                                                                     | 2             | 2.9707           | K.ITSPEENENNQQNK.D       | 2            | DCDC2_HUMAN          |
| Q9UHG0                                                                                     | 2             | 3.1806           | R.PMEVVNTEVK.P           | 2            | DCDC2_HUMAN          |
| Q9UHG0                                                                                     | 2             | 2.7343           | K.ITSPEENENNQQNKDYAAVA.- | 1            | DCDC2_HUMAN          |
| <b><i>Double-stranded RNA-binding protein Staufen homolog 2 - Homo sapiens (Human)</i></b> |               |                  |                          |              |                      |
| Q9NUL3                                                                                     | 2             | 2.9639           | K.ASTNLQDQLEK.T          | 1            | STAU2_HUMAN          |
| Q9NUL3                                                                                     | 3             | 4.7413           | K.GILHLSPDVYQEMEASR.H    | 2            | STAU2_HUMAN          |
| Q9NUL3                                                                                     | 2             | 3.8026           | K.NAAEAMLLQLGYK.A        | 1            | STAU2_HUMAN          |
| Q9NUL3                                                                                     | 2             | 3.3332           | K.VISGTTLGYLSPK.D        | 1            | STAU2_HUMAN          |
| <b><i>Double-stranded RNA-specific adenosine deaminase - Homo sapiens (Human)</i></b>      |               |                  |                          |              |                      |
| P55265                                                                                     | 2             | 4.0804           | R.DINAVLIDMER.Q          | 3            | DSRAD_HUMAN          |
| P55265                                                                                     | 2             | 4.4811           | R.NTNSVPETAPAAIPETR.R    | 3            | DSRAD_HUMAN          |
| P55265                                                                                     | 2             | 4.2297           | K.ARDINAVLIDMER.Q        | 2            | DSRAD_HUMAN          |
| <b><i>Dpy-30-like protein - Homo sapiens (Human)</i></b>                                   |               |                  |                          |              |                      |
| Q9C005                                                                                     | 2             | 2.8943           | K.AQFEDRN.-              | 3            | DPY30_HUMAN          |
| Q9C005                                                                                     | 3             | 3.923            | K.ERPPNPIEFASYLLK.N      | 4            | DPY30_HUMAN          |
| Q9C005                                                                                     | 3             | 6.0957           | R.AYLDQTVVPILLQGLAVLAK.E | 16           | DPY30_HUMAN          |
| Q9C005                                                                                     | 2             | 2.9792           | K.VDLQSLPTR.A            | 2            | DPY30_HUMAN          |

Accession No\* Charge XC(Max)\*\* Peptide\* TC\*\*\* Reference No\*

***DPYSL3 protein - Homo sapiens (Human)***

Q6DEN2 2 3.4463 K.RIVAPPGGR.S 2 Q6DEN2\_HUMAN

***Drebrin-like protein - Homo sapiens (Human)***

Q9UJU6 2 5.5045 K.SPTDUALFTYEGNSNDR.V 5 DBNL\_HUMAN  
 Q9UJU6 2 5.5212 R.FQDVGPQAPVGSVYQK.T 8 DBNL\_HUMAN  
 Q9UJU6 1 2.2102 K.GAHVTINAR.A 1 DBNL\_HUMAN  
 Q9UJU6 2 3.5169 R.NGPALQEAYVR.V 10 DBNL\_HUMAN  
 Q9UJU6 2 3.1779 K.FVLINWTGEGVNDVR.K 1 DBNL\_HUMAN  
 Q9UJU6 2 4.6868 R.TWEQQQEVVSR.N 4 DBNL\_HUMAN  
 Q9UJU6 3 5.1691 R.VAGTGEGGLEEMVEELNSGK.V 9 DBNL\_HUMAN  
 Q9UJU6 2 4.4028 R.AM#STTSISSPQPGK.L 4 DBNL\_HUMAN  
 Q9UJU6 3 4.2167 K.ESGRFQDVGPQAPVGSVYQK.T 2 DBNL\_HUMAN  
 Q9UJU6 2 3.6633 R.YQEQQGEASPQR.T 3 DBNL\_HUMAN  
 Q9UJU6 2 3.1932 R.GYGPDPGHFGM#FPANYVELIE.- 1 DBNL\_HUMAN  
 Q9UJU6 1 2.1018 K.DSFWAK.A 1 DBNL\_HUMAN  
 Q9UJU6 2 3.6564 R.AMSTTSISSPQPGK.L 3 DBNL\_HUMAN  
 Q9UJU6 2 4.595 R.NRNEQESAVHPR.E 6 DBNL\_HUMAN  
 Q9UJU6 2 4.4742 R.VAGTGEGGLEEM#VEELNSGK.V 3 DBNL\_HUMAN

***Dual specificity protein phosphatase 3 - Homo sapiens (Human)***

P51452 2 3.4661 R.IYVGNASVAQDIPK.L 2 DUS3\_HUMAN

***Dynactin 2 variant - Homo sapiens (Human)***

Q53H88 2 2.8454 R.ENLATVEGNFASIDER.M 2 Q53H88\_HUMAN  
 Q53H88 2 3.2491 R.LTELETAVR.C 2 Q53H88\_HUMAN  
 Q53H88 2 3.5989 R.TGYESGEYEMLGEGLVK.E 2 Q53H88\_HUMAN  
 Q53H88 2 3.0067 K.YADLPGIAR.N 2 Q53H88\_HUMAN  
 Q53H88 2 5.1268 R.WSPIASTLPELVQR.L 4 Q53H88\_HUMAN  
 Q53H88 3 3.9743 R.LLHEVQELTTEVEKIK.T 1 Q53H88\_HUMAN  
 Q53H88 2 3.0519 K.VHQLYETIQR.W 1 Q53H88\_HUMAN  
 Q53H88 2 4.7071 R.LLHEVQELTTEVEK.I 5 Q53H88\_HUMAN  
 Q53H88 2 3.4958 K.ASVEDADTQSK.V 3 Q53H88\_HUMAN  
 Q53H88 2 4.9394 K.DNTTLLTQVQTTMR.E 1 Q53H88\_HUMAN  
 Q53H88 2 3.6859 K.RLTELETAVR.C 2 Q53H88\_HUMAN  
 Q53H88 1 2.177 R.LQSVLGK.V 1 Q53H88\_HUMAN  
 Q53H88 2 3.4317 K.RLLLQLEATK.N 6 Q53H88\_HUMAN

Accession No\* Charge XC(Max)\*\* Peptide\* TC\*\*\* Reference No\*

***Dynamin-1-like protein - Homo sapiens (Human)***

|        |   |        |                             |   |             |
|--------|---|--------|-----------------------------|---|-------------|
| O00429 | 3 | 4.4861 | K.VPSALAPASQEPSPAASAEADGK.L | 4 | DNM1L_HUMAN |
| O00429 | 2 | 4.3412 | K.NVASGGGGVGDGVQEPTTGNWR.G  | 1 | DNM1L_HUMAN |

***Dynamin-binding protein - Homo sapiens (Human)***

|        |   |        |                  |   |             |
|--------|---|--------|------------------|---|-------------|
| Q6XZF7 | 2 | 3.417  | R.SGDSADVAR.D    | 5 | DNMBP_HUMAN |
| Q6XZF7 | 2 | 2.7182 | K.LTQQLIEFEK.S   | 1 | DNMBP_HUMAN |
| Q6XZF7 | 2 | 3.0871 | R.NPNELSVSANQK.L | 1 | DNMBP_HUMAN |

***Dystroglycan precursor - Homo sapiens (Human)***

|        |   |        |                     |   |            |
|--------|---|--------|---------------------|---|------------|
| Q14118 | 2 | 2.7073 | R.IAEDDGKPR.P       | 1 | DAG1_HUMAN |
| Q14118 | 2 | 4.0011 | K.LREQQLVGEK.S      | 6 | DAG1_HUMAN |
| Q14118 | 2 | 2.9062 | R.GGEPNQRPELK.N     | 1 | DAG1_HUMAN |
| Q14118 | 2 | 3.4171 | R.VTIPTDLIASSGDIK.V | 1 | DAG1_HUMAN |
| Q14118 | 1 | 2.371  | R.EQQLVGEK.S        | 1 | DAG1_HUMAN |
| Q14118 | 2 | 2.7224 | R.PAFSNALEPDFK.A    | 1 | DAG1_HUMAN |

***E1A-binding protein p400 - Homo sapiens (Human)***

|        |   |        |                        |   |             |
|--------|---|--------|------------------------|---|-------------|
| Q96L91 | 2 | 2.914  | K.ITAQQITTPGAQQK.V     | 2 | EP400_HUMAN |
| Q96L91 | 3 | 5.1333 | R.HQPASASSTAASPAHPAK.L | 2 | EP400_HUMAN |

***E2-induced gene 5 protein - Homo sapiens (Human)***

|        |   |        |                          |   |             |
|--------|---|--------|--------------------------|---|-------------|
| Q96A26 | 3 | 5.3346 | R.FKKEDEIPETVSLEMLDAAK.N | 4 | E2IG5_HUMAN |
| Q96A26 | 2 | 2.9118 | R.LKEEAAMK.A             | 2 | E2IG5_HUMAN |
| Q96A26 | 2 | 3.0504 | K.EDEIPETVSLEMLDAAK.N    | 1 | E2IG5_HUMAN |

***E3 SUMO-protein ligase CBX4 - Homo sapiens (Human)***

|        |   |        |                |   |            |
|--------|---|--------|----------------|---|------------|
| O00257 | 2 | 2.9258 | K.SGEVAEGEAR.S | 1 | CBX4_HUMAN |
|--------|---|--------|----------------|---|------------|

***E3 SUMO-protein ligase RanBP2 - Homo sapiens (Human)***

|        |   |        |                            |   |            |
|--------|---|--------|----------------------------|---|------------|
| P49792 | 2 | 2.8579 | K.SGFEGMFIR.K              | 1 | RBP2_HUMAN |
| P49792 | 2 | 4.1026 | K.EIDTDSTSQGESK.I          | 6 | RBP2_HUMAN |
| P49792 | 2 | 3.1561 | K.QNQTTAISTPASSEISK.A      | 2 | RBP2_HUMAN |
| P49792 | 2 | 3.9478 | K.ELVGPPLAETVFTPK.T        | 3 | RBP2_HUMAN |
| P49792 | 2 | 3.5546 | K.FGNTEQGFK.F              | 3 | RBP2_HUMAN |
| P49792 | 3 | 4.4356 | K.FGHVDQENSPSFMFQSSNTEFK.S | 2 | RBP2_HUMAN |

***E3 ubiquitin-protein ligase CBL - Homo sapiens (Human)***

|        |   |        |                     |   |           |
|--------|---|--------|---------------------|---|-----------|
| P22681 | 2 | 3.5583 | K.VPVSAPSSSDPWTGR.E | 3 | CBL_HUMAN |
|--------|---|--------|---------------------|---|-----------|

***E3 ubiquitin-protein ligase HECW1 - Homo sapiens (Human)***

| <i>Accession No*</i>                                                                | <i>Charge</i> | <i>XC(Max)**</i> | <i>Peptide*</i>                    | <i>TC***</i> | <i>Reference No*</i> |
|-------------------------------------------------------------------------------------|---------------|------------------|------------------------------------|--------------|----------------------|
| Q76N89                                                                              | 3             | 6.9435           | R.AGREEEEKEQEEEGDVSTLEQGEGR.L      | 1            | HECW1_HUMAN          |
| <b><i>E3 ubiquitin-protein ligase NEDD4-like protein - Homo sapiens (Human)</i></b> |               |                  |                                    |              |                      |
| Q96PU5                                                                              | 3             | 5.0245           | R.SSTVTGGEEPTPSVAYVHTTGPLPSGWEER.K | 2            | NED4L_HUMAN          |
| <b><i>E3 ubiquitin-protein ligase Praja2 - Homo sapiens (Human)</i></b>             |               |                  |                                    |              |                      |
| O43164                                                                              | 2             | 2.9661           | R.SSQDEM#VSTK.Q                    | 4            | PJA2_HUMAN           |
| O43164                                                                              | 2             | 4.9558           | R.YQESLGNTVFELENR.E                | 3            | PJA2_HUMAN           |
| <b><i>E3 ubiquitin-protein ligase RING1 - Homo sapiens (Human)</i></b>              |               |                  |                                    |              |                      |
| Q06587                                                                              | 2             | 4.1739           | K.TTGNATVDHLSK.Y                   | 1            | RING1_HUMAN          |
| <b><i>E3 ubiquitin-protein ligase RNF14 - Homo sapiens (Human)</i></b>              |               |                  |                                    |              |                      |
| Q9UBS8                                                                              | 2             | 3.2985           | R.IYLDLPQNFK.I                     | 2            | RNF14_HUMAN          |
| <b><i>E3 ubiquitin-protein ligase RNF25 - Homo sapiens (Human)</i></b>              |               |                  |                                    |              |                      |
| Q96BH1                                                                              | 2             | 3.047            | K.GPGSWQGPPPR.R                    | 1            | RNF25_HUMAN          |
| <b><i>Early endosome antigen 1 - Homo sapiens (Human)</i></b>                       |               |                  |                                    |              |                      |
| Q15075                                                                              | 3             | 4.1755           | K.KNIQATLHQK.D                     | 1            | EEA1_HUMAN           |
| Q15075                                                                              | 3             | 5.7174           | R.DDVTLRLRQEVQDLQASLKEEK.W         | 2            | EEA1_HUMAN           |
| Q15075                                                                              | 2             | 2.7482           | R.DDVTLRLR.Q                       | 1            | EEA1_HUMAN           |
| Q15075                                                                              | 4             | 5.2261           | R.ADLQNHLDTAQNALQDKQQELNKITTQLDQVT | 1            | EEA1_HUMAN           |
| Q15075                                                                              | 2             | 4.8501           | R.ADLQNHLDTAQNALQDK.Q              | 3            | EEA1_HUMAN           |
| Q15075                                                                              | 2             | 4.726            | K.NHTLQEQVTQLTEK.L                 | 1            | EEA1_HUMAN           |
| Q15075                                                                              | 2             | 4.4746           | K.YLSLEQKTEEELEGQIK.K              | 3            | EEA1_HUMAN           |
| Q15075                                                                              | 2             | 3.8304           | K.LTMQITALNENLGTVK.K               | 2            | EEA1_HUMAN           |
| Q15075                                                                              | 2             | 3.3301           | K.VSQLDIQIK.A                      | 1            | EEA1_HUMAN           |
| Q15075                                                                              | 3             | 4.0835           | K.TELENKLQQQLTQAAQELAAEKEK.I       | 1            | EEA1_HUMAN           |
| Q15075                                                                              | 2             | 3.2898           | R.IQTTVTELQK.V                     | 2            | EEA1_HUMAN           |
| Q15075                                                                              | 2             | 3.2925           | K.NQTLTENLLKK.E                    | 1            | EEA1_HUMAN           |
| Q15075                                                                              | 2             | 3.1997           | K.KEQQLQER.C                       | 1            | EEA1_HUMAN           |
| Q15075                                                                              | 2             | 3.5651           | K.ISVLQNNYEK.S                     | 3            | EEA1_HUMAN           |
| Q15075                                                                              | 2             | 3.8678           | K.IQNLEALLQK.S                     | 6            | EEA1_HUMAN           |
| Q15075                                                                              | 3             | 3.9955           | K.IQHEELNLR.I                      | 1            | EEA1_HUMAN           |
| Q15075                                                                              | 3             | 5.3605           | K.IQAGEGETAVLNQLQEK.N              | 4            | EEA1_HUMAN           |
| Q15075                                                                              | 2             | 4.87             | K.GPQEVAVYVQELQK.L                 | 2            | EEA1_HUMAN           |
| Q15075                                                                              | 2             | 4.3701           | K.ELVQVQTLMDNMTLER.E               | 2            | EEA1_HUMAN           |
| Q15075                                                                              | 2             | 2.788            | K.EALMTELSTVK.D                    | 2            | EEA1_HUMAN           |
| Q15075                                                                              | 2             | 3.8557           | K.LAEIEEIK.C                       | 3            | EEA1_HUMAN           |

| <i>Accession No*</i> | <i>Charge</i> | <i>XC(Max)**</i> | <i>Peptide*</i>                    | <i>TC***</i> | <i>Reference No*</i> |
|----------------------|---------------|------------------|------------------------------------|--------------|----------------------|
| Q15075               | 2             | 3.6887           | K.VTNSTELQHQLDK.T                  | 2            | EEA1_HUMAN           |
| Q15075               | 2             | 5.4254           | R.VLSLETSVNELNSQLNESK.E            | 4            | EEA1_HUMAN           |
| Q15075               | 2             | 3.8774           | K.LKEELSEVETK.Y                    | 2            | EEA1_HUMAN           |
| Q15075               | 2             | 5.2991           | R.KLDNTTAAVQELGR.E                 | 3            | EEA1_HUMAN           |
| Q15075               | 2             | 2.9675           | K.NIQATLHQK.D                      | 1            | EEA1_HUMAN           |
| Q15075               | 2             | 5.0801           | K.LMDKEQQVADLQLK.L                 | 3            | EEA1_HUMAN           |
| Q15075               | 2             | 3.2005           | K.LQSQYASSEATISQLR.S               | 2            | EEA1_HUMAN           |
| Q15075               | 3             | 4.9249           | K.LREAQNDLEQVLR.Q                  | 4            | EEA1_HUMAN           |
| Q15075               | 2             | 4.7391           | K.LSLAQEDLISNR.N                   | 7            | EEA1_HUMAN           |
| Q15075               | 1             | 2.3964           | K.ALQDIQK.E                        | 1            | EEA1_HUMAN           |
| Q15075               | 1             | 2.4812           | K.NALTPSSK.K                       | 2            | EEA1_HUMAN           |
| Q15075               | 2             | 2.7309           | K.SSVNELTQK.N                      | 1            | EEA1_HUMAN           |
| Q15075               | 2             | 3.5192           | K.KLEADSLEVK.A                     | 3            | EEA1_HUMAN           |
| Q15075               | 2             | 2.937            | K.ATLEQDSAKK.E                     | 3            | EEA1_HUMAN           |
| Q15075               | 2             | 5.0046           | K.KLQSQYASSEATISQLR.S              | 2            | EEA1_HUMAN           |
| Q15075               | 2             | 3.6564           | K.LM#DKEQQVADLQLK.L                | 1            | EEA1_HUMAN           |
| Q15075               | 2             | 3.2707           | K.KSEALESIK.Q                      | 4            | EEA1_HUMAN           |
| Q15075               | 2             | 4.246            | R.LTEELNKEATVIQDLK.T               | 2            | EEA1_HUMAN           |
| Q15075               | 2             | 5.1276           | K.ASKEQALQDLQQQR.Q                 | 2            | EEA1_HUMAN           |
| Q15075               | 2             | 3.3976           | K.SKENISLLEK.E                     | 2            | EEA1_HUMAN           |
| Q15075               | 2             | 5.0056           | K.QQHQQEQALQQSTTAK.L               | 4            | EEA1_HUMAN           |
| Q15075               | 2             | 3.6012           | K.QDFETLSQETK.I                    | 4            | EEA1_HUMAN           |
| Q15075               | 2             | 2.7717           | K.QAQENLHDQVQEQA.A                 | 1            | EEA1_HUMAN           |
| Q15075               | 3             | 7.8731           | K.YQGLQQQEAKPDGLVTDSSAELQSLEQQLEEA | 1            | EEA1_HUMAN           |
| Q15075               | 2             | 3.6316           | K.AAQLATEIADIK.S                   | 1            | EEA1_HUMAN           |
| Q15075               | 2             | 2.9157           | K.ATLEQDSAK.K                      | 2            | EEA1_HUMAN           |
| Q15075               | 2             | 3.1036           | K.SLGSADLFEK.H                     | 2            | EEA1_HUMAN           |

***Echinoderm microtubule-associated protein-like 1 - Homo sapiens (Human)***

|        |   |        |                     |   |             |
|--------|---|--------|---------------------|---|-------------|
| O00423 | 2 | 4.2646 | R.VQMQEDDIQLLK.S    | 5 | EMAL1_HUMAN |
| O00423 | 3 | 5.2594 | R.RLNITEEQQAVLNR.K  | 5 | EMAL1_HUMAN |
| O00423 | 3 | 5.3305 | R.RLNITEEQQAVLNRK.G | 2 | EMAL1_HUMAN |
| O00423 | 2 | 3.981  | R.VQM#QEDDIQLLK.S   | 2 | EMAL1_HUMAN |
| O00423 | 2 | 3.1041 | K.KPTGSLPSPSGVR.K   | 1 | EMAL1_HUMAN |
| O00423 | 1 | 2.3147 | K.SALADVVR.R        | 2 | EMAL1_HUMAN |
| O00423 | 1 | 2.2497 | K.RTSSSER.V         | 1 | EMAL1_HUMAN |

***Echinoderm microtubule-associated protein-like 3 - Homo sapiens (Human)***

| <i>Accession No*</i>                                                                            | <i>Charge</i> | <i>XC(Max)**</i> | <i>Peptide*</i>                     | <i>TC***</i> | <i>Reference No*</i> |
|-------------------------------------------------------------------------------------------------|---------------|------------------|-------------------------------------|--------------|----------------------|
| Q32P44                                                                                          | 2             | 2.9805           | R.GTQTETLEVELK.S                    | 2            | EMAL3_HUMAN          |
| <b><i>Echinoderm microtubule-associated protein-like 4 - Homo sapiens (Human)</i></b>           |               |                  |                                     |              |                      |
| Q9HC35                                                                                          | 3             | 5.115            | K.KEESHSDNQSPQIR.A                  | 3            | EMAL4_HUMAN          |
| Q9HC35                                                                                          | 2             | 4.2142           | K.SHNSWENSDDSR.N                    | 2            | EMAL4_HUMAN          |
| Q9HC35                                                                                          | 1             | 2.1395           | K.ETLSSAAK.S                        | 2            | EMAL4_HUMAN          |
| Q9HC35                                                                                          | 2             | 3.765            | R.LAISEDHVASVKK.S                   | 1            | EMAL4_HUMAN          |
| Q9HC35                                                                                          | 2             | 4.2368           | R.ASPSPQPSSQPLQIHR.Q                | 2            | EMAL4_HUMAN          |
| Q9HC35                                                                                          | 1             | 2.1506           | R.LSALESR.V                         | 1            | EMAL4_HUMAN          |
| Q9HC35                                                                                          | 2             | 3.1133           | K.AALADVLR.R                        | 2            | EMAL4_HUMAN          |
| Q9HC35                                                                                          | 2             | 3.8308           | R.VQQQEDEITVLK.A                    | 4            | EMAL4_HUMAN          |
| Q9HC35                                                                                          | 3             | 5.1357           | K.APVSSTESVIQSNTPTPPPSQPLNETAEESR.I | 1            | EMAL4_HUMAN          |
| Q9HC35                                                                                          | 3             | 4.5553           | R.RLAISEDHVASVK.K                   | 2            | EMAL4_HUMAN          |
| <b><i>Ectonucleoside triphosphate diphosphohydrolase 5 precursor - Homo sapiens (Human)</i></b> |               |                  |                                     |              |                      |
| O75356                                                                                          | 2             | 3.9365           | K.QGAETVQGLLEVAK.D                  | 2            | ENTP5_HUMAN          |
| O75356                                                                                          | 4             | 6.5527           | K.MPGQLPILEGEVFDVSVKPGLSAFVDQPK.Q   | 3            | ENTP5_HUMAN          |
| O75356                                                                                          | 4             | 5.9048           | K.M#PGQLPILEGEVFDVSVKPGLSAFVDQPK.Q  | 1            | ENTP5_HUMAN          |
| O75356                                                                                          | 2             | 2.7564           | R.AVDTDM#IDYEK.G                    | 1            | ENTP5_HUMAN          |
| <b><i>EF-hand domain-containing protein 1 - Homo sapiens (Human)</i></b>                        |               |                  |                                     |              |                      |
| Q9BUP0                                                                                          | 2             | 5.8634           | R.APTASADAELSAQLSR.R                | 3            | EFHD1_HUMAN          |
| Q9BUP0                                                                                          | 3             | 4.6962           | R.EEAEESGQLAPLGAPAPEPKPEPEPPAR.A    | 1            | EFHD1_HUMAN          |
| Q9BUP0                                                                                          | 2             | 3.8101           | R.VFNPHYTEFPEFSR.R                  | 2            | EFHD1_HUMAN          |
| <b><i>EF-hand domain-containing protein 2 - Homo sapiens (Human)</i></b>                        |               |                  |                                     |              |                      |
| Q96C19                                                                                          | 2             | 3.5377           | R.ADLNQGIGEPQSPSR.R                 | 1            | EFHD2_HUMAN          |
| <b><i>Egl nine homolog 1 - Homo sapiens (Human)</i></b>                                         |               |                  |                                     |              |                      |
| Q9GZT9                                                                                          | 3             | 3.7315           | R.AAAGGQGSAAVAEAEKPEPPAR.S          | 1            | EGLN1_HUMAN          |
| <b><i>EH domain-binding protein 1 - Homo sapiens (Human)</i></b>                                |               |                  |                                     |              |                      |
| Q8NDI1                                                                                          | 2             | 4.3847           | K.AETLELSDLYVSDK.K                  | 3            | EHBP1_HUMAN          |
| <b><i>EH domain-containing protein 1 - Homo sapiens (Human)</i></b>                             |               |                  |                                     |              |                      |
| Q9H4M9                                                                                          | 3             | 6.4661           | K.LADVVDKDLLDDEEFALANHLIK.V         | 4            | EHD1_HUMAN           |
| Q9H4M9                                                                                          | 2             | 3.7619           | K.DKPTYDEIFYTLSPVNGK.I              | 1            | EHD1_HUMAN           |
| <b><i>EH domain-containing protein 2 - Homo sapiens (Human)</i></b>                             |               |                  |                                     |              |                      |
| Q9NZN4                                                                                          | 2             | 3.0276           | K.LEGHGLPANLPR.R                    | 1            | EHD2_HUMAN           |
| <b><i>EH domain-containing protein 3 - Homo sapiens (Human)</i></b>                             |               |                  |                                     |              |                      |

| <i>Accession No*</i>                                                                                       | <i>Charge</i> | <i>XC(Max)**</i> | <i>Peptide*</i>               | <i>TC***</i> | <i>Reference No*</i> |
|------------------------------------------------------------------------------------------------------------|---------------|------------------|-------------------------------|--------------|----------------------|
| Q9NZN3                                                                                                     | 3             | 4.9632           | K.LADIDKDGMLDDDEFALANHLIK.V   | 2            | EHD3_HUMAN           |
| Q9NZN3                                                                                                     | 3             | 4.0786           | R.DKPMYDEIFYTLSPVDGK.I        | 2            | EHD3_HUMAN           |
| <b><i>EH domain-containing protein 4 - Homo sapiens (Human)</i></b>                                        |               |                  |                               |              |                      |
| Q9H223                                                                                                     | 2             | 3.5679           | K.LADCDCDGM#LDEEEFALAK.H      | 1            | EHD4_HUMAN           |
| Q9H223                                                                                                     | 1             | 2.3749           | K.ISGVNAK.K                   | 2            | EHD4_HUMAN           |
| Q9H223                                                                                                     | 3             | 4.9015           | K.DKPVYDELFTLSPINGK.I         | 1            | EHD4_HUMAN           |
| Q9H223                                                                                                     | 2             | 3.0532           | K.EGADEEEWVVAK.D              | 1            | EHD4_HUMAN           |
| <b><i>EHMT1 protein - Homo sapiens (Human)</i></b>                                                         |               |                  |                               |              |                      |
| Q86X08                                                                                                     | 2             | 4.0147           | K.TELLGEETPMAADEGSAEK.Q       | 1            | Q86X08_HUMAN         |
| <b><i>EIF4G1 variant protein - Homo sapiens (Human)</i></b>                                                |               |                  |                               |              |                      |
| Q4LE58                                                                                                     | 2             | 3.2183           | K.SDQWKPLNLEEK.K              | 1            | Q4LE58_HUMAN         |
| <b><i>ELAV-like protein 1 - Homo sapiens (Human)</i></b>                                                   |               |                  |                               |              |                      |
| Q15717                                                                                                     | 3             | 4.0403           | R.SEAEAAITSFNGHKPPGSSEPITVK.F | 1            | ELAV1_HUMAN          |
| Q15717                                                                                                     | 3             | 4.8723           | R.TNLIVNYLPQNMTQDEL.R.S       | 3            | ELAV1_HUMAN          |
| Q15717                                                                                                     | 2             | 3.7616           | R.VLVDQTTGLSR.G               | 1            | ELAV1_HUMAN          |
| Q15717                                                                                                     | 2             | 3.4347           | K.DANLYISGLPR.T               | 2            | ELAV1_HUMAN          |
| Q15717                                                                                                     | 2             | 3.1667           | K.FAANPNQNK.N                 | 2            | ELAV1_HUMAN          |
| Q15717                                                                                                     | 2             | 3.6309           | R.SLFSSIGEVESAK.L             | 3            | ELAV1_HUMAN          |
| Q15717                                                                                                     | 3             | 4.2601           | K.VAGHSLGYGFVNYVTAK.D         | 2            | ELAV1_HUMAN          |
| <b><i>Electrogenic sodium bicarbonate cotransporter 1 - Homo sapiens (Human)</i></b>                       |               |                  |                               |              |                      |
| Q9Y6R1                                                                                                     | 3             | 4.7381           | K.IPMDIMEQQPFLSDSKPSDR.E      | 2            | S4A4_HUMAN           |
| Q9Y6R1                                                                                                     | 3             | 4.0596           | K.IPMDIMEQQPFLSDSKPSDRER.S    | 2            | S4A4_HUMAN           |
| Q9Y6R1                                                                                                     | 1             | 2.4001           | R.SPTFLER.H                   | 3            | S4A4_HUMAN           |
| Q9Y6R1                                                                                                     | 3             | 4.8708           | K.IPMDIM#EQQPFLSDSKPSDR.E     | 1            | S4A4_HUMAN           |
| <b><i>Electron transfer flavoprotein subunit alpha, mitochondrial precursor - Homo sapiens (Human)</i></b> |               |                  |                               |              |                      |
| P13804                                                                                                     | 2             | 3.6508           | R.AAVDAGFVPNDMQVGQTGK.I       | 1            | ETFA_HUMAN           |
| P13804                                                                                                     | 2             | 2.7677           | K.ASSTSPVEISEWLDQK.L          | 1            | ETFA_HUMAN           |
| P13804                                                                                                     | 2             | 3.5029           | K.DPEAPIFQVADYGIVADLFK.V      | 1            | ETFA_HUMAN           |
| P13804                                                                                                     | 2             | 4.1531           | K.LEVAPISDIIAIK.S             | 3            | ETFA_HUMAN           |
| P13804                                                                                                     | 2             | 2.9875           | R.AAVDAGFVPNDM#QVGQTGK.I      | 1            | ETFA_HUMAN           |
| <b><i>Electron transfer flavoprotein subunit beta - Homo sapiens (Human)</i></b>                           |               |                  |                               |              |                      |
| P38117                                                                                                     | 2             | 2.9388           | K.LSVISVEDPPQR.T              | 2            | ETFB_HUMAN           |
| P38117                                                                                                     | 3             | 4.0096           | K.KIEVIKPGDLGVDLTSK.L         | 1            | ETFB_HUMAN           |

| <i>Accession No*</i>                                                               | <i>Charge</i> | <i>XC(Max)**</i> | <i>Peptide*</i>             | <i>TC***</i> | <i>Reference No*</i> |
|------------------------------------------------------------------------------------|---------------|------------------|-----------------------------|--------------|----------------------|
| P38117                                                                             | 2             | 3.7871           | K.IEVIKPGDLGVDLTSK.L        | 2            | ETFB_HUMAN           |
| P38117                                                                             | 2             | 2.8404           | R.LGPLQVAR.V                | 1            | ETFB_HUMAN           |
| <b><i>ELKS/RAB6-interacting/CAST family member 1 - Homo sapiens (Human)</i></b>    |               |                  |                             |              |                      |
| Q8IUD2                                                                             | 2             | 5.219            | R.DLNQLFQQDSSSR.T           | 2            | RB6I2_HUMAN          |
| Q8IUD2                                                                             | 3             | 6.0295           | K.SNGALSTEEREEEMKQMEVYR.S   | 3            | RB6I2_HUMAN          |
| Q8IUD2                                                                             | 2             | 4.4546           | R.DNTIMDLQTQLK.E            | 2            | RB6I2_HUMAN          |
| Q8IUD2                                                                             | 2             | 3.1928           | R.GLTTPASYNLDDDQAAWENELQK.M | 2            | RB6I2_HUMAN          |
| Q8IUD2                                                                             | 3             | 3.8062           | K.LSSTQQSLAEKETHLTNLR.A     | 1            | RB6I2_HUMAN          |
| Q8IUD2                                                                             | 2             | 3.7925           | K.AAGLQAEIGQVK.Q            | 2            | RB6I2_HUMAN          |
| Q8IUD2                                                                             | 2             | 2.7945           | K.SAQMLEEAR.R               | 1            | RB6I2_HUMAN          |
| Q8IUD2                                                                             | 2             | 3.1701           | R.EMVLAQEEESAR.T            | 2            | RB6I2_HUMAN          |
| <b><i>ELL-associated factor 2 - Homo sapiens (Human)</i></b>                       |               |                  |                             |              |                      |
| Q96CJ1                                                                             | 3             | 3.7464           | K.HSPSEDKM#SPASPIDDIER.E    | 1            | EAF2_HUMAN           |
| Q96CJ1                                                                             | 3             | 4.1378           | K.HSPSEDKMSPASPIDDIER.E     | 3            | EAF2_HUMAN           |
| <b><i>Elongation factor 1-beta - Homo sapiens (Human)</i></b>                      |               |                  |                             |              |                      |
| P24534                                                                             | 1             | 2.7055           | R.LAQYESK.K                 | 8            | EF1B_HUMAN           |
| P24534                                                                             | 2             | 5.7098           | K.SPAGLQVLNDYLADK.S         | 7            | EF1B_HUMAN           |
| <b><i>Elongation factor 2 - Homo sapiens (Human)</i></b>                           |               |                  |                             |              |                      |
| P13639                                                                             | 2             | 3.6426           | K.EGIPALDNFLDKL.-           | 3            | EF2_HUMAN            |
| <b><i>Elongation factor Tu, mitochondrial precursor - Homo sapiens (Human)</i></b> |               |                  |                             |              |                      |
| P49411                                                                             | 2             | 3.5837           | K.YEEIDNAPEER.A             | 4            | EFTU_HUMAN           |
| P49411                                                                             | 2             | 5.5496           | R.GITINAAHVEYSTAAR.H        | 4            | EFTU_HUMAN           |
| P49411                                                                             | 1             | 2.4927           | K.ILAEGGGAK.F               | 3            | EFTU_HUMAN           |
| P49411                                                                             | 2             | 4.8332           | K.KYEEIDNAPEER.A            | 5            | EFTU_HUMAN           |
| P49411                                                                             | 2             | 4.1001           | K.LLDAVDTYIPVPAR.D          | 6            | EFTU_HUMAN           |
| P49411                                                                             | 2             | 4.6268           | R.DLEKPFLLPVEAVYSVPGR.G     | 3            | EFTU_HUMAN           |
| P49411                                                                             | 2             | 3.4301           | R.GTVVTGTLER.G              | 1            | EFTU_HUMAN           |
| <b><i>EMILIN-1 precursor - Homo sapiens (Human)</i></b>                            |               |                  |                             |              |                      |
| Q9Y6C2                                                                             | 2             | 4.5778           | R.LVGSGLHTVEAAGEAR.Q        | 1            | EMIL1_HUMAN          |
| Q9Y6C2                                                                             | 2             | 5.2565           | K.VQQLEEQVQSLTK.E           | 3            | EMIL1_HUMAN          |
| Q9Y6C2                                                                             | 3             | 3.7716           | R.HEKVEAVLSR.S              | 1            | EMIL1_HUMAN          |
| Q9Y6C2                                                                             | 2             | 3.9533           | K.LVGGQAGLGR.R              | 2            | EMIL1_HUMAN          |
| Q9Y6C2                                                                             | 2             | 3.2492           | R.RVLDSEGQLR.L              | 4            | EMIL1_HUMAN          |
| Q9Y6C2                                                                             | 2             | 3.5315           | R.LDTVAGGLQGLR.E            | 2            | EMIL1_HUMAN          |



| <i>Accession No*</i> | <i>Charge</i> | <i>XC(Max)**</i> | <i>Peptide*</i>              | <i>TC***</i> | <i>Reference No*</i> |
|----------------------|---------------|------------------|------------------------------|--------------|----------------------|
| Q9Y6C2               | 2             | 3.1453           | R.HLAGLAVGR.R                | 4            | EMIL1_HUMAN          |
| Q9Y6C2               | 2             | 3.6135           | R.QATLEGLQEIVVGR.L           | 3            | EMIL1_HUMAN          |
| Q9Y6C2               | 2             | 3.6993           | R.YLLSAVLTGHR.H              | 2            | EMIL1_HUMAN          |
| Q9Y6C2               | 3             | 3.736            | R.LQQEATEHATESEER.F          | 1            | EMIL1_HUMAN          |
| Q9Y6C2               | 1             | 2.1315           | R.IISEINR.L                  | 1            | EMIL1_HUMAN          |
| Q9Y6C2               | 2             | 3.3224           | R.HVAGLWAGLR.E               | 2            | EMIL1_HUMAN          |
| Q9Y6C2               | 2             | 3.0004           | R.RLAELER.R                  | 1            | EMIL1_HUMAN          |
| Q9Y6C2               | 2             | 3.2384           | R.GVLQGLSGR.L                | 1            | EMIL1_HUMAN          |
| Q9Y6C2               | 3             | 3.8218           | R.GTELGGAAGQGGHPPGYTSLASR.L  | 1            | EMIL1_HUMAN          |
| Q9Y6C2               | 2             | 3.8178           | R.APAPASAPPGPSEELLR.Q        | 4            | EMIL1_HUMAN          |
| Q9Y6C2               | 2             | 3.8125           | R.GPGAGPGVGGPSR.G            | 2            | EMIL1_HUMAN          |
| Q9Y6C2               | 1             | 2.2818           | K.LLASVEER.Q                 | 1            | EMIL1_HUMAN          |
| Q9Y6C2               | 3             | 3.9072           | R.RGTELGGAAGQGGHPPGYTSLASR.L | 1            | EMIL1_HUMAN          |

***Endoglin precursor - Homo sapiens (Human)***

|        |   |        |                  |   |            |
|--------|---|--------|------------------|---|------------|
| P17813 | 2 | 3.8147 | K.TQILEWAAER.G   | 3 | EGLN_HUMAN |
| P17813 | 2 | 3.2065 | R.GEVTYTTSQVSK.G | 1 | EGLN_HUMAN |

***Endomucin precursor - Homo sapiens (Human)***

|        |   |        |                    |   |             |
|--------|---|--------|--------------------|---|-------------|
| Q9ULC0 | 2 | 3.7303 | K.TISHESGEHSAQGK.T | 1 | MUCEN_HUMAN |
|--------|---|--------|--------------------|---|-------------|

***Endoplasmic reticulum protein ERp29 precursor - Homo sapiens (Human)***

|        |   |        |                      |   |             |
|--------|---|--------|----------------------|---|-------------|
| P30040 | 2 | 4.2027 | R.DGDFENVPYTGAVK.V   | 4 | ERP29_HUMAN |
| P30040 | 2 | 2.9205 | K.FDTQYPYGEK.Q       | 2 | ERP29_HUMAN |
| P30040 | 3 | 4.0056 | K.YKLDKESYPVFYLF.R.D | 1 | ERP29_HUMAN |
| P30040 | 2 | 4.2526 | K.SLNILTAFAQK.K      | 6 | ERP29_HUMAN |
| P30040 | 3 | 3.7153 | K.FDTQYPYGEKQDEFKR.L | 1 | ERP29_HUMAN |
| P30040 | 2 | 3.3806 | K.MSDGKKEELQK.S      | 5 | ERP29_HUMAN |
| P30040 | 2 | 2.8776 | K.KGAKEEEL.-         | 3 | ERP29_HUMAN |
| P30040 | 2 | 3.3523 | K.GALPLDVTIFYK.V     | 3 | ERP29_HUMAN |
| P30040 | 2 | 5.1196 | K.ILDQGEDFPASEM#TR.I | 6 | ERP29_HUMAN |
| P30040 | 2 | 2.8696 | K.SKFVLVK.F          | 2 | ERP29_HUMAN |
| P30040 | 2 | 2.8739 | K.ESYPVFYLF.R.D      | 3 | ERP29_HUMAN |
| P30040 | 2 | 2.9017 | K.M#SDGKKEELQK.S     | 1 | ERP29_HUMAN |
| P30040 | 2 | 5.0195 | K.ILDQGEDFPASEMTR.I  | 8 | ERP29_HUMAN |

***Endoplasmin precursor - Homo sapiens (Human)***

|        |   |        |                           |   |            |
|--------|---|--------|---------------------------|---|------------|
| P14625 | 2 | 3.3146 | K.EVEEDEYKAFYK.S          | 3 | ENPL_HUMAN |
| P14625 | 3 | 3.9479 | K.NLLHVTDGTGVGM#TREELVK.N | 1 | ENPL_HUMAN |

| <i>Accession No*</i> | <i>Charge</i> | <i>XC(Max)**</i> | <i>Peptide*</i>         | <i>TC***</i> | <i>Reference No*</i> |
|----------------------|---------------|------------------|-------------------------|--------------|----------------------|
| P14625               | 2             | 3.1295           | R.VFITDDFHDM#MPK.Y      | 1            | ENPL_HUMAN           |
| P14625               | 2             | 3.566            | R.SGYLLPDTK.A           | 5            | ENPL_HUMAN           |
| P14625               | 3             | 3.7362           | R.RVFITDDFHDMMPK.Y      | 1            | ENPL_HUMAN           |
| P14625               | 3             | 3.9227           | R.RVFITDDFHDM#MPK.Y     | 1            | ENPL_HUMAN           |
| P14625               | 2             | 3.0125           | R.LSLNIDPAK.V           | 1            | ENPL_HUMAN           |
| P14625               | 2             | 3.0821           | K.IADDKYNDTFWK.E        | 1            | ENPL_HUMAN           |
| P14625               | 3             | 4.0392           | K.AQAYQTGKDISTNYYASQK.K | 1            | ENPL_HUMAN           |
| P14625               | 2             | 3.8851           | K.DISTNYYASQK.K         | 4            | ENPL_HUMAN           |
| P14625               | 2             | 3.6427           | K.DISTNYYASQKK.T        | 2            | ENPL_HUMAN           |
| P14625               | 2             | 2.787            | K.EAESSPFVER.L          | 1            | ENPL_HUMAN           |
| P14625               | 2             | 3.4035           | R.LISLTDENALSGNEELTVK.I | 2            | ENPL_HUMAN           |
| P14625               | 1             | 2.3051           | K.EVEEDEYK.A            | 1            | ENPL_HUMAN           |
| P14625               | 2             | 4.9974           | K.YSQFINFPIYVWSSK.T     | 2            | ENPL_HUMAN           |
| P14625               | 2             | 3.7765           | K.FAFQAEVNR.M           | 4            | ENPL_HUMAN           |
| P14625               | 3             | 3.9293           | K.NLLHVTDGTGVGMREELVK.N | 4            | ENPL_HUMAN           |
| P14625               | 2             | 4.8224           | K.GVVSDDLPLNVS.R.E      | 16           | ENPL_HUMAN           |
| P14625               | 2             | 5.7053           | R.FQSSHPTDITSLDQYVER.M  | 4            | ENPL_HUMAN           |
| P14625               | 3             | 4.5693           | K.IADDKYNDTFWKEFGTNIK.L | 2            | ENPL_HUMAN           |
| P14625               | 2             | 4.8339           | K.KYSQFINFPIYVWSSK.T    | 4            | ENPL_HUMAN           |
| P14625               | 2             | 3.1639           | K.LIINSLYK.N            | 1            | ENPL_HUMAN           |
| P14625               | 2             | 4.6226           | K.NLLHVTDGTGVGMTR.E     | 4            | ENPL_HUMAN           |
| P14625               | 1             | 2.1201           | K.SGTSEFLNK.M           | 1            | ENPL_HUMAN           |
| P14625               | 2             | 3.7151           | K.SILFVPTSAPR.G         | 8            | ENPL_HUMAN           |
| P14625               | 2             | 3.635            | R.EAVEKEFEPLLNWM#K.D    | 1            | ENPL_HUMAN           |
| P14625               | 2             | 3.1164           | K.EEASDYLELDTIK.N       | 1            | ENPL_HUMAN           |
| P14625               | 2             | 2.7138           | K.FDESEKTK.E            | 1            | ENPL_HUMAN           |

***Endothelial cell-selective adhesion molecule precursor - Homo sapiens (Human)***

|        |   |        |                               |   |            |
|--------|---|--------|-------------------------------|---|------------|
| Q96AP7 | 3 | 5.8132 | R.LPTTDGAHPQPISPIPGGVSSGLSR.M | 6 | ESAM_HUMAN |
|--------|---|--------|-------------------------------|---|------------|

***Endothelial differentiation-related factor 1 - Homo sapiens (Human)***

|        |   |        |                    |    |            |
|--------|---|--------|--------------------|----|------------|
| O60869 | 3 | 6.2699 | K.INEKQVIADYESGR.A | 10 | EDF1_HUMAN |
| O60869 | 2 | 2.7675 | R.ETEELHHR.V       | 1  | EDF1_HUMAN |
| O60869 | 2 | 3.0499 | R.GKDIGKPIEK.G     | 1  | EDF1_HUMAN |

***Enhancer of mRNA-decapping protein 3 - Homo sapiens (Human)***

|        |   |        |                  |   |            |
|--------|---|--------|------------------|---|------------|
| Q96F86 | 2 | 3.6894 | K.AAVFEEIDTYER.R | 1 | EDC3_HUMAN |
|--------|---|--------|------------------|---|------------|

***Enhancer of mRNA-decapping protein 4 - Homo sapiens (Human)***

| <i>Accession No*</i>                                                                     | <i>Charge</i> | <i>XC(Max)**</i> | <i>Peptide*</i>                  | <i>TC***</i> | <i>Reference No*</i> |
|------------------------------------------------------------------------------------------|---------------|------------------|----------------------------------|--------------|----------------------|
| Q6P2E9                                                                                   | 3             | 5.1556           | R.TRSPDVISSASTALSQDIPEIASEALSR.G | 1            | EDC4_HUMAN           |
| Q6P2E9                                                                                   | 2             | 3.3672           | K.DDGDAAMGSR.L                   | 2            | EDC4_HUMAN           |
| <b><i>Enhancer of rudimentary homolog - Homo sapiens (Human)</i></b>                     |               |                  |                                  |              |                      |
| P84090                                                                                   | 2             | 2.7402           | R.ADTQTYQPYNKDVIK.E              | 1            | ERH_HUMAN            |
| <b><i>Enhancer of yellow 2 homolog - Homo sapiens (Human)</i></b>                        |               |                  |                                  |              |                      |
| Q9NPA8                                                                                   | 2             | 2.8156           | R.TFLAQHASL.-                    | 1            | Q9NPA8_HUMAN         |
| <b><i>Enoyl-CoA hydratase, mitochondrial precursor - Homo sapiens (Human)</i></b>        |               |                  |                                  |              |                      |
| P30084                                                                                   | 2             | 3.9219           | K.NNTVGLIQLNRPK.A                | 4            | ECHM_HUMAN           |
| P30084                                                                                   | 3             | 3.726            | K.KLFYSTFATDDRK.E                | 1            | ECHM_HUMAN           |
| P30084                                                                                   | 2             | 3.1913           | K.SLAMEMVLTGDR.I                 | 2            | ECHM_HUMAN           |
| P30084                                                                                   | 3             | 4.0563           | R.GKNNTVGLIQLNRPK.A              | 1            | ECHM_HUMAN           |
| P30084                                                                                   | 2             | 4.5098           | K.AQFAQPEILIGTIPGAGGTQR.L        | 3            | ECHM_HUMAN           |
| <b><i>Enscosin - Homo sapiens (Human)</i></b>                                            |               |                  |                                  |              |                      |
| Q14244                                                                                   | 2             | 2.9114           | R.REQEELER.Q                     | 3            | MAP7_HUMAN           |
| Q14244                                                                                   | 2             | 3.6963           | R.RLEAEQAR.E                     | 15           | MAP7_HUMAN           |
| Q14244                                                                                   | 2             | 3.3346           | K.VTVESTPDLEK.Q                  | 3            | MAP7_HUMAN           |
| Q14244                                                                                   | 2             | 3.4571           | K.VEEATVEER.T                    | 7            | MAP7_HUMAN           |
| Q14244                                                                                   | 2             | 3.8761           | K.TSAGTTDPEEATR.L                | 5            | MAP7_HUMAN           |
| Q14244                                                                                   | 2             | 3.0492           | K.REELAQR.V                      | 3            | MAP7_HUMAN           |
| Q14244                                                                                   | 2             | 3.6709           | R.SETAPDSYKQDK.K                 | 2            | MAP7_HUMAN           |
| <b><i>Eosinophil cationic protein precursor - Homo sapiens (Human)</i></b>               |               |                  |                                  |              |                      |
| P12724                                                                                   | 2             | 3.7695           | R.YPVVPVHLDTTI.-                 | 2            | ECP_HUMAN            |
| <b><i>EPB41L5 protein - Homo sapiens (Human)</i></b>                                     |               |                  |                                  |              |                      |
| Q8IZ12                                                                                   | 2             | 2.8477           | R.GGNQWNTR.A                     | 1            | Q8IZ12_HUMAN         |
| <b><i>Ephrin-B1 precursor - Homo sapiens (Human)</i></b>                                 |               |                  |                                  |              |                      |
| P98172                                                                                   | 2             | 3.2639           | K.NLEPVSWSLNP.K.F                | 2            | EFNB1_HUMAN          |
| P98172                                                                                   | 2             | 3.6734           | K.GGSGTAGTEPSDIIPLR.T            | 2            | EFNB1_HUMAN          |
| <b><i>Ephrin-B2 precursor - Homo sapiens (Human)</i></b>                                 |               |                  |                                  |              |                      |
| P52799                                                                                   | 2             | 4.7682           | K.VGQDASSAGSTR.N                 | 5            | EFNB2_HUMAN          |
| P52799                                                                                   | 2             | 3.8445           | K.FQEFSPNLWGLEFQK.N              | 1            | EFNB2_HUMAN          |
| <b><i>Epidermal growth factor receptor kinase substrate 8 - Homo sapiens (Human)</i></b> |               |                  |                                  |              |                      |
| Q12929                                                                                   | 2             | 3.5408           | R.APAPAPPVTQVDVR.S               | 2            | EPS8_HUMAN           |
| Q12929                                                                                   | 2             | 4.1712           | R.QNSSSSDSGGSIVR.D               | 3            | EPS8_HUMAN           |

| <i>Accession No*</i> | <i>Charge</i> | <i>XC(Max)**</i> | <i>Peptide*</i>                   | <i>TC***</i> | <i>Reference No*</i> |
|----------------------|---------------|------------------|-----------------------------------|--------------|----------------------|
| Q12929               | 2             | 4.521            | R.QNVPVINITYDSTPEDVK.T            | 3            | EPS8_HUMAN           |
| Q12929               | 3             | 5.7697           | R.MEYGPRPADTPPAPSPPTPAPVPVPLPPSTP | 2            | EPS8_HUMAN           |
| Q12929               | 3             | 5.3734           | R.KSQMEEVQDELIHR.L                | 2            | EPS8_HUMAN           |
| Q12929               | 3             | 3.84             | R.GSHLDQGEAAVAFKPTSNR.H           | 1            | EPS8_HUMAN           |
| Q12929               | 2             | 3.7372           | K.ISAAASDSGVESFDEGSSH.-           | 5            | EPS8_HUMAN           |
| Q12929               | 3             | 5.4214           | R.NNSELSVLKDDILEILDDRK.Q          | 1            | EPS8_HUMAN           |
| Q12929               | 2             | 3.5971           | K.AALEDSSGSSELQEIM#R.R            | 1            | EPS8_HUMAN           |
| Q12929               | 2             | 3.1426           | K.AALEDSSGSSELQEIMR.R             | 2            | EPS8_HUMAN           |

***Epidermal growth factor receptor kinase substrate 8-like protein 1 - Homo sapiens (Human)***

|        |   |        |                       |   |             |
|--------|---|--------|-----------------------|---|-------------|
| Q8TE68 | 2 | 3.0972 | R.DLEPESEPQLESETAGK.W | 1 | ES8L1_HUMAN |
|--------|---|--------|-----------------------|---|-------------|

***Epidermal growth factor receptor kinase substrate 8-like protein 2 - Homo sapiens (Human)***

|        |   |        |                         |   |             |
|--------|---|--------|-------------------------|---|-------------|
| Q9H6S3 | 2 | 3.4826 | R.VYSQLTM#QK.A          | 5 | ES8L2_HUMAN |
| Q9H6S3 | 1 | 3.363  | R.VYSQLTMQK.A           | 7 | ES8L2_HUMAN |
| Q9H6S3 | 2 | 5.6292 | R.IVENLGILTGPQLFSLNK.E  | 3 | ES8L2_HUMAN |
| Q9H6S3 | 2 | 3.6983 | R.SQPVSQPLTYESGPDEV.R.A | 2 | ES8L2_HUMAN |
| Q9H6S3 | 3 | 4.2677 | R.NANELSVLKDEVLEVEDGR.Q | 1 | ES8L2_HUMAN |
| Q9H6S3 | 1 | 2.283  | R.AWLEAK.A              | 3 | ES8L2_HUMAN |
| Q9H6S3 | 1 | 2.2269 | K.ILYDFTAR.N            | 2 | ES8L2_HUMAN |
| Q9H6S3 | 2 | 3.4487 | K.QQSGSELEELMNK.F       | 2 | ES8L2_HUMAN |

***Epidermal growth factor receptor substrate 15 - Homo sapiens (Human)***

|        |   |       |                      |   |            |
|--------|---|-------|----------------------|---|------------|
| P42566 | 2 | 2.742 | R.LQQETAEELESVESGK.A | 1 | EP15_HUMAN |
|--------|---|-------|----------------------|---|------------|

***Epididymal secretory protein E1 precursor - Homo sapiens (Human)***

|        |   |        |                                    |   |            |
|--------|---|--------|------------------------------------|---|------------|
| P61916 | 3 | 4.2202 | K.AVVHGMGMVVPFPIPEPDGCKSGINCPIQK.D | 2 | NPC2_HUMAN |
| P61916 | 2 | 3.2362 | K.TYSYLNKLPVK.S                    | 3 | NPC2_HUMAN |
| P61916 | 1 | 2.1569 | K.TYSYLNK.L                        | 2 | NPC2_HUMAN |
| P61916 | 3 | 3.936  | K.DKTYSYLNKLPVK.S                  | 1 | NPC2_HUMAN |
| P61916 | 2 | 3.4553 | K.LPVKSEYPSIK.L                    | 2 | NPC2_HUMAN |
| P61916 | 1 | 2.3376 | K.SEYPSIK.L                        | 4 | NPC2_HUMAN |

***Epithelial protein lost in neoplasm beta variant - Homo sapiens (Human)***

|        |   |        |                     |   |              |
|--------|---|--------|---------------------|---|--------------|
| Q59FE8 | 2 | 3.3105 | R.STPAEDDSPGDSQVK.S | 3 | Q59FE8_HUMAN |
|--------|---|--------|---------------------|---|--------------|

***EPRS protein - Homo sapiens (Human)***

|        |   |        |                     |   |              |
|--------|---|--------|---------------------|---|--------------|
| A0AVA9 | 1 | 2.3    | K.EDVDAAVK.Q        | 1 | A0AVA9_HUMAN |
| A0AVA9 | 3 | 4.3894 | K.APKEDVDAAVK.Q     | 2 | A0AVA9_HUMAN |
| A0AVA9 | 2 | 3.6972 | K.SLYDEVAQAQGEVVR.K | 1 | A0AVA9_HUMAN |

| <i>Accession No*</i> | <i>Charge</i> | <i>XC(Max)**</i> | <i>Peptide*</i>                    | <i>TC***</i> | <i>Reference No*</i> |
|----------------------|---------------|------------------|------------------------------------|--------------|----------------------|
| A0AVA9               | 3             | 4.1461           | K.TGQEYKPGNPPAEIGQNISSNSSASILESK.S | 2            | A0AVA9_HUMAN         |
| A0AVA9               | 3             | 5.032            | K.APKDQVDIAVQELLQLK.A              | 3            | A0AVA9_HUMAN         |
| A0AVA9               | 2             | 3.9189           | K.KAPKEDVDAAVK.Q                   | 4            | A0AVA9_HUMAN         |
| A0AVA9               | 2             | 2.8937           | R.VAVQGDVVR.E                      | 1            | A0AVA9_HUMAN         |
| A0AVA9               | 2             | 5.1104           | K.DQVDIAVQELLQLK.A                 | 1            | A0AVA9_HUMAN         |

***Epsin-1 - Homo sapiens (Human)***

|        |   |        |                                   |   |            |
|--------|---|--------|-----------------------------------|---|------------|
| Q9Y6I3 | 2 | 2.7331 | R.SPGAFDM#SGVR.G                  | 1 | EPN1_HUMAN |
| Q9Y6I3 | 3 | 5.153  | K.TPESFLGPNAALVDLDSLVRPGTPPGAK.A  | 6 | EPN1_HUMAN |
| Q9Y6I3 | 3 | 4.1078 | R.KTPESFLGPNAALVDLDSLVRPGTPPGAK.A | 2 | EPN1_HUMAN |
| Q9Y6I3 | 2 | 3.4305 | R.SPGAFDMMSGVR.G                  | 2 | EPN1_HUMAN |
| Q9Y6I3 | 2 | 3.7523 | R.TALPTSGSSAGELELLAGEVPAR.S       | 2 | EPN1_HUMAN |
| Q9Y6I3 | 2 | 2.9285 | K.AMTLMEYLIK.T                    | 2 | EPN1_HUMAN |
| Q9Y6I3 | 2 | 4.9052 | R.GSLAEAVGSPPPAATPTPTPTR.K        | 2 | EPN1_HUMAN |

***Erythrocyte band 7 integral membrane protein - Homo sapiens (Human)***

|        |   |        |                 |   |            |
|--------|---|--------|-----------------|---|------------|
| P27105 | 2 | 2.8813 | R.AM#AAEAEASR.E | 1 | STOM_HUMAN |
|--------|---|--------|-----------------|---|------------|

***Erythrocyte membrane protein band 4.1 like 5 - Homo sapiens (Human)***

|        |   |       |                          |   |              |
|--------|---|-------|--------------------------|---|--------------|
| Q7Z5S1 | 3 | 4.268 | R.LPGLGEPEVEYETLKDTSEK.L | 1 | Q7Z5S1_HUMAN |
| Q7Z5S1 | 2 | 2.916 | K.QLEMENSPLLSR.S         | 2 | Q7Z5S1_HUMAN |

***ESF1 homolog - Homo sapiens (Human)***

|        |   |        |                   |   |            |
|--------|---|--------|-------------------|---|------------|
| Q9H501 | 2 | 3.2214 | K.DGTSPEEEIEIER.Q | 2 | ESF1_HUMAN |
|--------|---|--------|-------------------|---|------------|

***Espin. - Homo sapiens (Human)***

|        |   |        |                          |   |              |
|--------|---|--------|--------------------------|---|--------------|
| Q5T8W7 | 3 | 5.021  | K.SFNMMSPDGDNSSELLAEIK.A | 4 | Q5T8W7_HUMAN |
| Q5T8W7 | 2 | 3.3164 | K.MQEEEEQR.R             | 3 | Q5T8W7_HUMAN |
| Q5T8W7 | 2 | 3.1543 | K.M#QEEEEQR.R            | 3 | Q5T8W7_HUMAN |

***Ester hydrolase C11orf54 - Homo sapiens (Human)***

|        |   |        |                       |   |             |
|--------|---|--------|-----------------------|---|-------------|
| Q9H0W9 | 2 | 2.719  | K.KVYDLNK.I           | 1 | CK054_HUMAN |
| Q9H0W9 | 3 | 5.1227 | R.IAEVGGVPYLLPLVNQK.K | 6 | CK054_HUMAN |

***ETS domain-containing transcription factor ERF - Homo sapiens (Human)***

|        |   |        |                    |   |           |
|--------|---|--------|--------------------|---|-----------|
| P50548 | 2 | 3.5835 | R.GEGPGEAGGPLTPR.R | 1 | ERF_HUMAN |
|--------|---|--------|--------------------|---|-----------|

***Eukaryotic translation initiation factor 2 subunit 1 - Homo sapiens (Human)***

|        |   |        |                     |   |            |
|--------|---|--------|---------------------|---|------------|
| P05198 | 2 | 3.1668 | K.VVTDTDETELAR.Q    | 2 | IF2A_HUMAN |
| P05198 | 2 | 4.5154 | R.TEGLSVLSQAMAVIK.E | 2 | IF2A_HUMAN |

***Eukaryotic translation initiation factor 2 subunit 2 - Homo sapiens (Human)***

| <i>Accession No*</i>                                                                       | <i>Charge</i> | <i>XC(Max)**</i> | <i>Peptide*</i>             | <i>TC***</i> | <i>Reference No*</i> |
|--------------------------------------------------------------------------------------------|---------------|------------------|-----------------------------|--------------|----------------------|
| P20042                                                                                     | 3             | 4.4446           | K.IESDVQEPTPEDDLLDIMLGNKK.K | 1            | IF2B_HUMAN           |
| P20042                                                                                     | 3             | 5.337            | K.KIFDIDEAEEGVK.D           | 2            | IF2B_HUMAN           |
| P20042                                                                                     | 3             | 4.6772           | K.KIFDIDEAEEGVKDLK.I        | 5            | IF2B_HUMAN           |
| P20042                                                                                     | 3             | 5.5212           | R.KKDASDDLDDLNFFNQK.K       | 2            | IF2B_HUMAN           |
| <b><i>Eukaryotic translation initiation factor 2A - Homo sapiens (Human)</i></b>           |               |                  |                             |              |                      |
| Q9BY44                                                                                     | 2             | 4.0441           | K.SPDLAPTAPQSTPR.N          | 2            | EIF2A_HUMAN          |
| Q9BY44                                                                                     | 2             | 4.2347           | R.NTVSQSISGDPEIDKK.I        | 2            | EIF2A_HUMAN          |
| Q9BY44                                                                                     | 2             | 4.3553           | K.AIEQLKEQAATGK.Q           | 2            | EIF2A_HUMAN          |
| <b><i>Eukaryotic translation initiation factor 3 subunit 1 - Homo sapiens (Human)</i></b>  |               |                  |                             |              |                      |
| O75822                                                                                     | 2             | 3.3192           | K.LQEESDLELAK.E             | 2            | IF31_HUMAN           |
| O75822                                                                                     | 2             | 2.8864           | K.VLTPEEQLADKLR.L           | 1            | IF31_HUMAN           |
| <b><i>Eukaryotic translation initiation factor 3 subunit 10 - Homo sapiens (Human)</i></b> |               |                  |                             |              |                      |
| Q14152                                                                                     | 2             | 2.7778           | R.GPAEESSWR.D               | 3            | IF3A_HUMAN           |
| Q14152                                                                                     | 2             | 3.2904           | K.AREESWGPPR.E              | 1            | IF3A_HUMAN           |
| Q14152                                                                                     | 2             | 3.6093           | R.RGPAEESSWR.D              | 3            | IF3A_HUMAN           |
| Q14152                                                                                     | 2             | 2.7974           | R.RVPPPALS.R                | 6            | IF3A_HUMAN           |
| Q14152                                                                                     | 2             | 3.2814           | R.SEREEVSSWR.R              | 2            | IF3A_HUMAN           |
| Q14152                                                                                     | 2             | 3.5497           | R.TKNETDEDGWTTVR.R          | 1            | IF3A_HUMAN           |
| <b><i>Eukaryotic translation initiation factor 3 subunit 3 - Homo sapiens (Human)</i></b>  |               |                  |                             |              |                      |
| O15372                                                                                     | 2             | 3.7832           | K.EGTGSTATSSSSTAGAAGK.G     | 3            | IF33_HUMAN           |
| <b><i>Eukaryotic translation initiation factor 3 subunit 4 - Homo sapiens (Human)</i></b>  |               |                  |                             |              |                      |
| O75821                                                                                     | 2             | 3.0374           | K.EKLPGELEPVQATQNK.T        | 1            | IF34_HUMAN           |
| O75821                                                                                     | 2             | 3.3082           | R.RADDNATIR.V               | 1            | IF34_HUMAN           |
| O75821                                                                                     | 2             | 4.6147           | K.LPGELEPVQATQNK.T          | 2            | IF34_HUMAN           |
| O75821                                                                                     | 2             | 3.0636           | K.ELAEQLGLSTGEK.E           | 2            | IF34_HUMAN           |
| <b><i>Eukaryotic translation initiation factor 3 subunit 8 - Homo sapiens (Human)</i></b>  |               |                  |                             |              |                      |
| Q99613                                                                                     | 2             | 3.1619           | K.SIVDKEGVPR.F              | 1            | IF38_HUMAN           |
| Q99613                                                                                     | 2             | 3.8956           | R.FEELTNLIR.T               | 6            | IF38_HUMAN           |
| Q99613                                                                                     | 2             | 3.3801           | K.RFEELTNLIR.T              | 2            | IF38_HUMAN           |
| <b><i>Eukaryotic translation initiation factor 3 subunit 9 - Homo sapiens (Human)</i></b>  |               |                  |                             |              |                      |
| P55884                                                                                     | 2             | 4.4989           | R.AQAVSEDAGGNEGR.A          | 2            | IF39_HUMAN           |
| <b><i>Eukaryotic translation initiation factor 4 gamma 3 - Homo sapiens (Human)</i></b>    |               |                  |                             |              |                      |
| O43432                                                                                     | 2             | 2.9265           | R.RSPVPAQIAITVPK.T          | 1            | IF4G3_HUMAN          |

| <i>Accession No*</i>                                                                               | <i>Charge</i> | <i>XC(Max)**</i> | <i>Peptide*</i>                    | <i>TC***</i> | <i>Reference No*</i> |
|----------------------------------------------------------------------------------------------------|---------------|------------------|------------------------------------|--------------|----------------------|
| O43432                                                                                             | 2             | 3.0292           | R.VLEEDESIR.T                      | 1            | IF4G3_HUMAN          |
| <b><i>Eukaryotic translation initiation factor 4B - Homo sapiens (Human)</i></b>                   |               |                  |                                    |              |                      |
| Q4G0E3                                                                                             | 2             | 4.1527           | K.EDDSSASTSQSTR.A                  | 12           | Q4G0E3_HUMAN         |
| Q4G0E3                                                                                             | 2             | 3.6301           | R.STPKEDDSSASTSQSTR.A              | 4            | Q4G0E3_HUMAN         |
| <b><i>Eukaryotic translation initiation factor 4E-binding protein 1 - Homo sapiens (Human)</i></b> |               |                  |                                    |              |                      |
| Q13541                                                                                             | 3             | 3.9847           | R.RVVLGDGVQLPPGDYSTTPGGTLFSTTPGGTR | 1            | 4EBP1_HUMAN          |
| <b><i>Eukaryotic translation initiation factor 4E-binding protein 2 - Homo sapiens (Human)</i></b> |               |                  |                                    |              |                      |
| Q13542                                                                                             | 2             | 3.6614           | K.HAVGDDAQFEM#DI.-                 | 2            | 4EBP2_HUMAN          |
| Q13542                                                                                             | 2             | 3.295            | K.HAVGDDAQFEMDI.-                  | 3            | 4EBP2_HUMAN          |
| <b><i>Eukaryotic translation initiation factor 4H - Homo sapiens (Human)</i></b>                   |               |                  |                                    |              |                      |
| Q15056                                                                                             | 2             | 3.0658           | R.PREEVVQKEQE.-                    | 1            | IF4H_HUMAN           |
| Q15056                                                                                             | 1             | 3.2396           | R.EEVVQKEQE.-                      | 4            | IF4H_HUMAN           |
| Q15056                                                                                             | 2             | 3.0326           | R.GSNMDFREPTTEER.A                 | 1            | IF4H_HUMAN           |
| Q15056                                                                                             | 1             | 2.2823           | R.AYSSFGGGR.G                      | 1            | IF4H_HUMAN           |
| <b><i>Eukaryotic translation initiation factor 5A-1 - Homo sapiens (Human)</i></b>                 |               |                  |                                    |              |                      |
| P63241                                                                                             | 3             | 4.6002           | R.EDLRLPEGLDGLKEIEQK.Y             | 3            | IF5A1_HUMAN          |
| P63241                                                                                             | 2             | 2.7484           | R.EDLRLPEGLDGLK.E                  | 1            | IF5A1_HUMAN          |
| P63241                                                                                             | 2             | 5.5427           | R.NDFQLIGIQDGYLSLLQDSGEVR.E        | 4            | IF5A1_HUMAN          |
| <b><i>Eukaryotic translation initiation factor 5B - Homo sapiens (Human)</i></b>                   |               |                  |                                    |              |                      |
| O60841                                                                                             | 2             | 3.0276           | R.KFEEETVK.S                       | 3            | IF2P_HUMAN           |
| O60841                                                                                             | 2             | 2.7392           | K.RLEELEAK.R                       | 1            | IF2P_HUMAN           |
| O60841                                                                                             | 2             | 3.3822           | K.WDGSEEDEDNSK.K                   | 1            | IF2P_HUMAN           |
| <b><i>Extracellular calcium-sensing receptor precursor - Homo sapiens (Human)</i></b>              |               |                  |                                    |              |                      |
| P41180                                                                                             | 3             | 4.1782           | R.QKQQQPLALTQQEQQQPLTLPQQQR.S      | 1            | CASR_HUMAN           |
| <b><i>Extracellular matrix protein FRAS1 precursor - Homo sapiens (Human)</i></b>                  |               |                  |                                    |              |                      |
| Q86XX4                                                                                             | 2             | 3.638            | R.DGSAQSGVDYYPK.S                  | 2            | FRAS1_HUMAN          |
| <b><i>Extracellular superoxide dismutase [Cu-Zn] precursor - Homo sapiens (Human)</i></b>          |               |                  |                                    |              |                      |
| P08294                                                                                             | 2             | 4.0768           | R.AVVVHAGEDDLGR.G                  | 5            | SODE_HUMAN           |
| P08294                                                                                             | 2             | 5.3662           | R.AGLAASLAGPHSIVGR.A               | 3            | SODE_HUMAN           |
| P08294                                                                                             | 2             | 4.408            | R.GGNQASVENGNAGR.R                 | 2            | SODE_HUMAN           |
| P08294                                                                                             | 2             | 2.7635           | R.VTGVVLFRR.Q                      | 1            | SODE_HUMAN           |
| P08294                                                                                             | 2             | 3.5869           | K.VTEIWQEVMSQR.R                   | 4            | SODE_HUMAN           |
| P08294                                                                                             | 2             | 4.8113           | K.VTEIWQEVMSQR.R                   | 3            | SODE_HUMAN           |

Accession No\* Charge XC(Max)\*\* Peptide\* TC\*\*\* Reference No\*

***Ezrin-radixin-moesin-binding phosphoprotein 50 - Homo sapiens (Human)***

|        |   |        |                                   |    |             |
|--------|---|--------|-----------------------------------|----|-------------|
| O14745 | 3 | 3.727  | R.AQEAPGQAEPAAAAEVQGAGNENEPREADK. | 1  | NHERF_HUMAN |
| O14745 | 2 | 4.7637 | R.LLVDPETDEQLQK.L                 | 15 | NHERF_HUMAN |
| O14745 | 2 | 4.2663 | K.GPNGYGFHLHGEK.G                 | 1  | NHERF_HUMAN |
| O14745 | 2 | 4.2971 | K.GPSGYGFNLHSDK.S                 | 3  | NHERF_HUMAN |
| O14745 | 3 | 7.9583 | K.AGLLAGDRLVEVNGENVEKETHQQVVS.R.I | 6  | NHERF_HUMAN |
| O14745 | 2 | 5.9356 | K.AGLLAGDRLVEVNGENVEK.E           | 4  | NHERF_HUMAN |
| O14745 | 1 | 3.0618 | K.AGLLAGDR.L                      | 7  | NHERF_HUMAN |
| O14745 | 2 | 3.3997 | R.IVEVNGVCMGK.Q                   | 1  | NHERF_HUMAN |
| O14745 | 1 | 3.2077 | R.LVEVNGENVEK.E                   | 4  | NHERF_HUMAN |
| O14745 | 1 | 2.7743 | R.ETDEFFK.K                       | 1  | NHERF_HUMAN |
| O14745 | 2 | 5.3851 | K.KGPSGYGFNLHSDK.S                | 10 | NHERF_HUMAN |
| O14745 | 2 | 3.307  | R.EALAEAALESPRALVR.S              | 5  | NHERF_HUMAN |
| O14745 | 2 | 4.295  | K.LLVVDRETDEFFK.K                 | 20 | NHERF_HUMAN |
| O14745 | 2 | 2.807  | K.RAPQMDWSK.K                     | 2  | NHERF_HUMAN |
| O14745 | 3 | 4.1266 | K.RAPQMDWSK.N                     | 1  | NHERF_HUMAN |
| O14745 | 2 | 2.8349 | R.APQMDWSK.K                      | 5  | NHERF_HUMAN |
| O14745 | 2 | 6.4949 | R.AQEAPGQAEPAAAAEVQGAGNENEPR.E    | 23 | NHERF_HUMAN |
| O14745 | 2 | 4.831  | R.EALAEAALESPR.P                  | 4  | NHERF_HUMAN |
| O14745 | 2 | 6.0259 | R.LVEVNGENVEKETHQQVVS.R.I         | 9  | NHERF_HUMAN |
| O14745 | 2 | 3.8177 | R.SVDPDSPAASGLR.A                 | 7  | NHERF_HUMAN |
| O14745 | 2 | 5.353  | R.SASSDTSEELNSQDSPPK.Q            | 7  | NHERF_HUMAN |
| O14745 | 2 | 3.4676 | R.IVEVNGVCM#EGK.Q                 | 2  | NHERF_HUMAN |
| O14745 | 1 | 2.7295 | R.LVEPGSPA.EK.A                   | 4  | NHERF_HUMAN |
| O14745 | 2 | 3.9244 | K.LLVVDRETDEFFK.K                 | 8  | NHERF_HUMAN |

***FABP1 protein - Homo sapiens (Human)***

|        |   |        |                     |    |              |
|--------|---|--------|---------------------|----|--------------|
| Q05CP7 | 2 | 4.4275 | K.YQLQSQENFEAFM#K.A | 9  | Q05CP7_HUMAN |
| Q05CP7 | 2 | 4.2461 | K.YQLQSQENFEAFMK.A  | 35 | Q05CP7_HUMAN |
| Q05CP7 | 1 | 4.0766 | K.GVSEIVQNGK.H      | 9  | Q05CP7_HUMAN |
| Q05CP7 | 1 | 2.1121 | K.FTITAGSK.V        | 1  | Q05CP7_HUMAN |
| Q05CP7 | 2 | 3.2733 | K.AIGLPEELIQK.GK.D  | 2  | Q05CP7_HUMAN |

***F-actin-capping protein subunit alpha-1 - Homo sapiens (Human)***

|        |   |        |                        |   |             |
|--------|---|--------|------------------------|---|-------------|
| P52907 | 3 | 5.0232 | K.FITHAPPGEFNEVFNDVR.L | 2 | CAZA1_HUMAN |
| P52907 | 2 | 3.2102 | K.EASDPQPEEADGGLK.S    | 2 | CAZA1_HUMAN |

***F-actin-capping protein subunit alpha-2 - Homo sapiens (Human)***



| <i>Accession No*</i>                                                              | <i>Charge</i> | <i>XC(Max)**</i> | <i>Peptide*</i>            | <i>TC***</i> | <i>Reference No*</i> |
|-----------------------------------------------------------------------------------|---------------|------------------|----------------------------|--------------|----------------------|
| P47755                                                                            | 3             | 5.0252           | K.FIIHAPPGEFNEVFNDVR.L     | 1            | CAZA2_HUMAN          |
| <b><i>FAM39B protein - Homo sapiens (Human)</i></b>                               |               |                  |                            |              |                      |
| Q2TAC3                                                                            | 2             | 5.2509           | R.QDDGSSASPSVQGAPR.E       | 10           | Q2TAC3_HUMAN         |
| <b><i>FAM44A protein - Homo sapiens (Human)</i></b>                               |               |                  |                            |              |                      |
| Q96AL1                                                                            | 2             | 3.4532           | R.SLTVSDDAESSEPER.K        | 2            | Q96AL1_HUMAN         |
| Q96AL1                                                                            | 2             | 3.664            | K.TDTGIVTVEQSPSSK.L        | 1            | Q96AL1_HUMAN         |
| <b><i>Family with sequence similarity 39, member B - Homo sapiens (Human)</i></b> |               |                  |                            |              |                      |
| Q86TK9                                                                            | 2             | 4.0968           | R.ATSQGGDLMSDLFNK.L        | 1            | Q86TK9_HUMAN         |
| Q86TK9                                                                            | 2             | 3.8325           | R.ATSQGGDLM#SDLFNK.L       | 1            | Q86TK9_HUMAN         |
| <b><i>Far upstream element-binding protein 1 - Homo sapiens (Human)</i></b>       |               |                  |                            |              |                      |
| Q96AE4                                                                            | 2             | 3.3664           | K.VPDGMVGFIIGR.G           | 1            | FUBP1_HUMAN          |
| Q96AE4                                                                            | 2             | 4.1505           | K.RPLEDGDQPDAKK.V          | 4            | FUBP1_HUMAN          |
| Q96AE4                                                                            | 2             | 3.3344           | R.IGGNEGIDVPIPR.F          | 1            | FUBP1_HUMAN          |
| Q96AE4                                                                            | 3             | 3.9148           | K.TGLIIGKGGETIKSISQQSGAR.I | 1            | FUBP1_HUMAN          |
| Q96AE4                                                                            | 2             | 3.9498           | K.RPLEDGDQPDAK.K           | 4            | FUBP1_HUMAN          |
| Q96AE4                                                                            | 2             | 4.0512           | K.IGGDAGTSLNSNDYGYGGQK.R   | 2            | FUBP1_HUMAN          |
| Q96AE4                                                                            | 1             | 3.774            | R.LLDQIVEK.G               | 5            | FUBP1_HUMAN          |
| Q96AE4                                                                            | 3             | 4.2049           | R.SVM#TEEYKVPDGMVGFIIGR.G  | 2            | FUBP1_HUMAN          |
| Q96AE4                                                                            | 3             | 4.011            | R.SVMTEEYKVPDGM#VGFIIGR.G  | 1            | FUBP1_HUMAN          |
| Q96AE4                                                                            | 2             | 3.8194           | K.IQIAPDSGGLPER.S          | 3            | FUBP1_HUMAN          |
| <b><i>Far upstream element-binding protein 2 - Homo sapiens (Human)</i></b>       |               |                  |                            |              |                      |
| Q92945                                                                            | 2             | 3.8515           | K.AINQQTGAFVEISR.Q         | 1            | FUBP2_HUMAN          |
| Q92945                                                                            | 2             | 3.5154           | K.VQISPDSSGGLPER.S         | 1            | FUBP2_HUMAN          |
| Q92945                                                                            | 2             | 3.5221           | K.DAFADAVQR.A              | 3            | FUBP2_HUMAN          |
| Q92945                                                                            | 2             | 3.6273           | K.MMLDDIVSR.G              | 4            | FUBP2_HUMAN          |
| Q92945                                                                            | 2             | 3.3407           | K.LASQGDSISSQLGPIHPPPR.T   | 2            | FUBP2_HUMAN          |
| Q92945                                                                            | 2             | 2.8829           | K.M#M#LDDIVSR.G            | 1            | FUBP2_HUMAN          |
| Q92945                                                                            | 2             | 3.5092           | K.MM#LDDIVSR.G             | 1            | FUBP2_HUMAN          |
| Q92945                                                                            | 2             | 2.7021           | R.QLEDGDQPESK.L            | 1            | FUBP2_HUMAN          |
| Q92945                                                                            | 3             | 5.7873           | K.KLASQGDSISSQLGPIHPPPR.T  | 2            | FUBP2_HUMAN          |
| Q92945                                                                            | 2             | 3.3775           | R.KDAFADAVQR.A             | 2            | FUBP2_HUMAN          |
| Q92945                                                                            | 2             | 3.7126           | R.IQFKQDDGTGPEK.I          | 1            | FUBP2_HUMAN          |
| Q92945                                                                            | 2             | 2.9746           | R.QLEDGDQPESK.K            | 3            | FUBP2_HUMAN          |
| Q92945                                                                            | 2             | 4.486            | R.SVSLTGAPESVQK.A          | 3            | FUBP2_HUMAN          |

| <i>Accession No*</i>                                                                         | <i>Charge</i> | <i>XC(Max)**</i> | <i>Peptide*</i>            | <i>TC***</i> | <i>Reference No*</i> |
|----------------------------------------------------------------------------------------------|---------------|------------------|----------------------------|--------------|----------------------|
| Q92945                                                                                       | 3             | 4.5142           | R.TSM#TEEYRVPDGM#VGLIIGR.G | 1            | FUBP2_HUMAN          |
| Q92945                                                                                       | 3             | 5.1142           | R.TSM#TEEYRVPDGMVGLIIGR.G  | 2            | FUBP2_HUMAN          |
| Q92945                                                                                       | 3             | 5.3077           | R.TSMTEEYRVPDGM#VGLIIGR.G  | 3            | FUBP2_HUMAN          |
| Q92945                                                                                       | 2             | 4.494            | R.IGGGIDVPVPR.H            | 4            | FUBP2_HUMAN          |
| Q92945                                                                                       | 2             | 4.2878           | R.IINDLLQSLR.S             | 3            | FUBP2_HUMAN          |
| <b><i>Far upstream element-binding protein 3 - Homo sapiens (Human)</i></b>                  |               |                  |                            |              |                      |
| Q96124                                                                                       | 2             | 2.9654           | K.AEGFVDALHR.V             | 1            | FUBP3_HUMAN          |
| Q96124                                                                                       | 3             | 3.7495           | R.IQFKPDDGISPER.A          | 1            | FUBP3_HUMAN          |
| Q96124                                                                                       | 3             | 4.6156           | K.RPLDDGVGNQLGALVHQR.T     | 1            | FUBP3_HUMAN          |
| <b><i>Fatty acid-binding protein, epidermal - Homo sapiens (Human)</i></b>                   |               |                  |                            |              |                      |
| Q01469                                                                                       | 1             | 2.2854           | K.GFDEYMK.E                | 1            | FABPE_HUMAN          |
| <b><i>Fatty acid-binding protein, heart - Homo sapiens (Human)</i></b>                       |               |                  |                            |              |                      |
| P05413                                                                                       | 2             | 3.5304           | R.QVASM#TKPTTIIIEK.N       | 2            | FABPH_HUMAN          |
| P05413                                                                                       | 2             | 2.8734           | K.LGVEFDETTADDRK.V         | 1            | FABPH_HUMAN          |
| P05413                                                                                       | 2             | 4.2356           | R.QVASMTKPTTIIIEK.N        | 5            | FABPH_HUMAN          |
| P05413                                                                                       | 2             | 4.4558           | K.LGVEFDETTADDR.K          | 3            | FABPH_HUMAN          |
| P05413                                                                                       | 2             | 3.8483           | K.WDGQETTLVR.E             | 8            | FABPH_HUMAN          |
| P05413                                                                                       | 2             | 3.0759           | K.SLGVGFATR.Q              | 1            | FABPH_HUMAN          |
| P05413                                                                                       | 1             | 2.7372           | K.SIVTLDGGK.L              | 4            | FABPH_HUMAN          |
| P05413                                                                                       | 1             | 2.9015           | K.NGDILTLK.T               | 3            | FABPH_HUMAN          |
| P05413                                                                                       | 3             | 4.2957           | K.LVDSKNFDDYMKSLGVGFATR.Q  | 1            | FABPH_HUMAN          |
| P05413                                                                                       | 1             | 2.3644           | K.NFDDYMK.S                | 4            | FABPH_HUMAN          |
| <b><i>F-box/WD repeat protein 9 - Homo sapiens (Human)</i></b>                               |               |                  |                            |              |                      |
| Q5XUX1                                                                                       | 2             | 4.7392           | R.TWDDSDPESETDPDAQAK.A     | 7            | FBXW9_HUMAN          |
| <b><i>FCH domain only protein 1 - Homo sapiens (Human)</i></b>                               |               |                  |                            |              |                      |
| O14526                                                                                       | 2             | 2.8328           | K.QNIENSVEMLLRK.F          | 1            | FCHO1_HUMAN          |
| <b><i>FCH domain only protein 2 - Homo sapiens (Human)</i></b>                               |               |                  |                            |              |                      |
| Q0JRZ9                                                                                       | 2             | 4.083            | K.VSIGNITLSPAISR.H         | 3            | FCHO2_HUMAN          |
| <b><i>FERM, RhoGEF and pleckstrin domain-containing protein 1 - Homo sapiens (Human)</i></b> |               |                  |                            |              |                      |
| Q9Y4F1                                                                                       | 2             | 3.7346           | K.VSAGEPGSHPSAPR.R         | 6            | FARP1_HUMAN          |
| Q9Y4F1                                                                                       | 3             | 3.717            | K.QADGAASAPTEEEEEVVKDR.T   | 1            | FARP1_HUMAN          |
| <b><i>FERM, RhoGEF and pleckstrin domain-containing protein 2 - Homo sapiens (Human)</i></b> |               |                  |                            |              |                      |
| O94887                                                                                       | 2             | 4.6854           | K.DSSSSLTDPQVSYVK.S        | 3            | FARP2_HUMAN          |

Accession No\* Charge XC(Max)\*\* Peptide\* TC\*\*\* Reference No\*

***Ferritin heavy chain - Homo sapiens (Human)***

|        |   |        |                               |   |            |
|--------|---|--------|-------------------------------|---|------------|
| P02794 | 2 | 4.5015 | K.MGAPESGLAEYLFDK.H           | 3 | FRIH_HUMAN |
| P02794 | 3 | 4.007  | K.MGAPESGLAEYLFDKHTLGSDNES.-  | 1 | FRIH_HUMAN |
| P02794 | 2 | 3.368  | K.AI KELGDHVTNLR.K            | 1 | FRIH_HUMAN |
| P02794 | 2 | 2.9121 | K.M#GAPESGLAEYLFDK.H          | 1 | FRIH_HUMAN |
| P02794 | 3 | 3.7278 | R.KMGAPESGLAEYLFDKHTLGSDNES.- | 1 | FRIH_HUMAN |
| P02794 | 2 | 4.3763 | K.NVNQSLLELHK.L               | 4 | FRIH_HUMAN |

***Ferritin light chain - Homo sapiens (Human)***

|        |   |        |                     |   |            |
|--------|---|--------|---------------------|---|------------|
| P02792 | 2 | 4.8123 | R.LGGPEAGLGEYLFER.L | 7 | FRIL_HUMAN |
|--------|---|--------|---------------------|---|------------|

***FGFR1 oncogene partner - Homo sapiens (Human)***

|        |   |        |                              |   |             |
|--------|---|--------|------------------------------|---|-------------|
| O95684 | 2 | 2.8445 | K.IGSFLSNR.T                 | 1 | FR1OP_HUMAN |
| O95684 | 3 | 5.1017 | K.IGSLGLGTGEDDDYVDDFNSTSHR.S | 4 | FR1OP_HUMAN |

***FGFR1 oncogene partner 2 - Homo sapiens (Human)***

|        |   |        |                          |   |             |
|--------|---|--------|--------------------------|---|-------------|
| Q9NVK5 | 3 | 4.2269 | R.LRDHDDAAESLIEQTTALNK.R | 2 | FGOP2_HUMAN |
| Q9NVK5 | 3 | 3.8531 | R.TSLEEHQSALELIMSK.Y     | 1 | FGOP2_HUMAN |
| Q9NVK5 | 2 | 3.3059 | K.QYQEEIQELNEVAR.H       | 2 | FGOP2_HUMAN |

***FH1/FH2 domain-containing protein 3 - Homo sapiens (Human)***

|        |   |        |                      |   |             |
|--------|---|--------|----------------------|---|-------------|
| Q2V2M9 | 2 | 3.8259 | K.TSSPSVEDATPALGVR.T | 1 | FHOD3_HUMAN |
| Q2V2M9 | 2 | 4.0994 | R.ISTLQANSQTQDESVR.R | 1 | FHOD3_HUMAN |
| Q2V2M9 | 3 | 4.0912 | K.SPDDEEKGDGEAGR.T   | 1 | FHOD3_HUMAN |

***Fibrillin-1 precursor - Homo sapiens (Human)***

|        |   |        |                   |   |            |
|--------|---|--------|-------------------|---|------------|
| P35555 | 2 | 3.1566 | R.YEDEECTLPIAGR.H | 2 | FBN1_HUMAN |
| P35555 | 1 | 3.6545 | K.GYILQEDGR.S     | 9 | FBN1_HUMAN |
| P35555 | 2 | 2.7626 | K.LNEVSQK.C       | 1 | FBN1_HUMAN |
| P35555 | 1 | 2.8586 | R.AGYQSTLTR.T     | 5 | FBN1_HUMAN |
| P35555 | 2 | 2.7372 | K.GFIYKPDLK.T     | 1 | FBN1_HUMAN |

***Fibrinogen alpha chain precursor [Contains: Fibrinopeptide A] - Homo sapiens (Human)***

|        |   |        |                           |    |            |
|--------|---|--------|---------------------------|----|------------|
| P02671 | 2 | 3.299  | R.MELERPGGNEITR.G         | 3  | FIBA_HUMAN |
| P02671 | 2 | 4.5513 | K.MADEAGSEADHEGTHSTK.R    | 5  | FIBA_HUMAN |
| P02671 | 3 | 5.2622 | R.HRHPDEAAFFDTASTGK.T     | 4  | FIBA_HUMAN |
| P02671 | 2 | 4.7441 | R.PGSTGTWNPSSER.G         | 10 | FIBA_HUMAN |
| P02671 | 3 | 5.4206 | R.NPSSAGSWNSGSSGPGSTGNR.N | 3  | FIBA_HUMAN |
| P02671 | 3 | 3.8179 | K.TFPGFFSPM#LGEFVSETESR.G | 1  | FIBA_HUMAN |

| <i>Accession No*</i>                                                  | <i>Charge</i> | <i>XC(Max)**</i> | <i>Peptide*</i>                      | <i>TC***</i> | <i>Reference No*</i> |
|-----------------------------------------------------------------------|---------------|------------------|--------------------------------------|--------------|----------------------|
| P02671                                                                | 2             | 3.5858           | K.ESSSHHPGIAEFPSR.G                  | 3            | FIBA_HUMAN           |
| P02671                                                                | 2             | 3.6324           | R.GGSTSYGTGSETESPR.N                 | 3            | FIBA_HUMAN           |
| P02671                                                                | 2             | 3.2625           | R.HPDEAAFFDTASTGK.T                  | 4            | FIBA_HUMAN           |
| P02671                                                                | 3             | 7.0406           | R.GGSTSYGTGSETESPRNPSSAGSWNSGSSGP    | 2            | FIBA_HUMAN           |
| P02671                                                                | 3             | 4.0232           | K.MADEAGSEADHEGTHSTKR.G              | 2            | FIBA_HUMAN           |
| P02671                                                                | 2             | 3.1391           | R.GDSTFESK.S                         | 3            | FIBA_HUMAN           |
| P02671                                                                | 2             | 3.8584           | K.TVIGPDGHKEVTK.E                    | 7            | FIBA_HUMAN           |
| P02671                                                                | 2             | 4.7702           | K.TFPGFFSPMLGEFVSETESR.G             | 3            | FIBA_HUMAN           |
| P02671                                                                | 2             | 4.2717           | K.M#ADEAGSEADHEGTHSTK.R              | 3            | FIBA_HUMAN           |
| <b><i>Fibrinogen gamma chain precursor - Homo sapiens (Human)</i></b> |               |                  |                                      |              |                      |
| P02679                                                                | 2             | 2.8204           | R.FGSYCPTTCGIADFLSTYQTK.V            | 1            | FIBG_HUMAN           |
| <b><i>Fibroleukin precursor - Homo sapiens (Human)</i></b>            |               |                  |                                      |              |                      |
| Q14314                                                                | 2             | 2.8866           | K.LNLVNMNNIENYVDSK.V                 | 1            | FGL2_HUMAN           |
| Q14314                                                                | 3             | 4.4492           | K.NAKEEINVLHGR.L                     | 1            | FGL2_HUMAN           |
| Q14314                                                                | 2             | 3.2628           | K.LQADDNGDPGR.N                      | 2            | FGL2_HUMAN           |
| <b><i>Fibronectin precursor - Homo sapiens (Human)</i></b>            |               |                  |                                      |              |                      |
| P02751                                                                | 3             | 6.6739           | R.RPGGEPSPGTTGQSYNQYSQR.Y            | 2            | FINC_HUMAN           |
| <b><i>Fibulin-1 precursor - Homo sapiens (Human)</i></b>              |               |                  |                                      |              |                      |
| P23142                                                                | 2             | 5.1368           | K.SQETGDLVDVGGGLQETDK.I              | 1            | FBLN1_HUMAN          |
| P23142                                                                | 2             | 3.8101           | K.TGYFDGISR.M                        | 3            | FBLN1_HUMAN          |
| P23142                                                                | 2             | 3.6847           | K.IIEVEEQEDPYLNDR.C                  | 2            | FBLN1_HUMAN          |
| P23142                                                                | 3             | 6.6406           | K.SQETGDLVDVGGGLQETDKIIEVEEQEDPYLNDR | 3            | FBLN1_HUMAN          |
| <b><i>Filamin B - Homo sapiens (Human)</i></b>                        |               |                  |                                      |              |                      |
| Q60FE7                                                                | 3             | 6.2179           | R.GLVEPVNVVDNGDGHTHTVTYTPSQEGPYMVS   | 2            | Q60FE7_HUMAN         |
| <b><i>Filamin-C - Homo sapiens (Human)</i></b>                        |               |                  |                                      |              |                      |
| Q14315                                                                | 2             | 2.941            | K.AKLDVQFAGTAK.G                     | 1            | FLNC_HUMAN           |
| Q14315                                                                | 3             | 4.5232           | K.GEVVRDFEIIDNHDSYTVK.Y              | 2            | FLNC_HUMAN           |
| Q14315                                                                | 2             | 4.2191           | R.AWGPGLETGQVGK.S                    | 4            | FLNC_HUMAN           |
| <b><i>FK506-binding protein 15 - Homo sapiens (Human)</i></b>         |               |                  |                                      |              |                      |
| Q5T1M5                                                                | 2             | 3.557            | R.EVAPDGPLQESSTR.L                   | 4            | Q5T1M5_HUMAN         |
| Q5T1M5                                                                | 3             | 4.2252           | K.KDDVTSSTGPHK.E                     | 5            | Q5T1M5_HUMAN         |
| Q5T1M5                                                                | 2             | 3.5798           | K.SQMSGVEAAASDPSEK.V                 | 1            | Q5T1M5_HUMAN         |
| Q5T1M5                                                                | 2             | 3.1444           | K.DDVTSSTGPHK.E                      | 2            | Q5T1M5_HUMAN         |

| <i>Accession No*</i>                                                   | <i>Charge</i> | <i>XC(Max)**</i> | <i>Peptide*</i>          | <i>TC***</i> | <i>Reference No*</i> |
|------------------------------------------------------------------------|---------------|------------------|--------------------------|--------------|----------------------|
| Q5T1M5                                                                 | 2             | 3.0587           | K.AQPEEEDDEDEVSMK.G      | 1            | Q5T1M5_HUMAN         |
| <b><i>FK506-binding protein 2 precursor - Homo sapiens (Human)</i></b> |               |                  |                          |              |                      |
| P26885                                                                 | 2             | 3.1426           | R.KLVIPSELGYGER.G        | 2            | FKBP2_HUMAN          |
| P26885                                                                 | 2             | 3.7697           | K.LVIPSELGYGER.G         | 1            | FKBP2_HUMAN          |
| <b><i>FK506-binding protein 3 - Homo sapiens (Human)</i></b>           |               |                  |                          |              |                      |
| Q00688                                                                 | 3             | 5.4756           | K.FLQEHGSDSFLAEHK.L      | 7            | FKBP3_HUMAN          |
| Q00688                                                                 | 2             | 2.8697           | R.AWTVEQLR.S             | 1            | FKBP3_HUMAN          |
| Q00688                                                                 | 2             | 4.0662           | K.SEETLDEGPPK.Y          | 6            | FKBP3_HUMAN          |
| Q00688                                                                 | 2             | 4.1221           | R.GWDEALLTM#SK.G         | 3            | FKBP3_HUMAN          |
| Q00688                                                                 | 2             | 4.2854           | R.GWDEALLTMSK.G          | 3            | FKBP3_HUMAN          |
| Q00688                                                                 | 2             | 3.1589           | R.LEIEPEWAYGK.K          | 1            | FKBP3_HUMAN          |
| Q00688                                                                 | 2             | 3.2984           | K.ETKSEETLDEGPPK.Y       | 2            | FKBP3_HUMAN          |
| Q00688                                                                 | 2             | 4.28             | K.ARLEIEPEWAYGK.K        | 2            | FKBP3_HUMAN          |
| Q00688                                                                 | 2             | 3.743            | K.SEETLDEGPPKYTK.S       | 2            | FKBP3_HUMAN          |
| Q00688                                                                 | 1             | 2.2084           | R.SEQLPK.K               | 1            | FKBP3_HUMAN          |
| Q00688                                                                 | 1             | 2.1137           | K.LLGNIK.N               | 1            | FKBP3_HUMAN          |
| <b><i>FK506-binding protein 4 - Homo sapiens (Human)</i></b>           |               |                  |                          |              |                      |
| Q02790                                                                 | 2             | 4.4342           | K.AEASSGDHPTDTEMKEEQK.S  | 8            | FKBP4_HUMAN          |
| Q02790                                                                 | 2             | 4.0054           | K.AEASSGDHPTDTEM#KEEQK.S | 5            | FKBP4_HUMAN          |
| Q02790                                                                 | 1             | 4.5512           | K.SNTAGSQSQVETE.-        | 3            | FKBP4_HUMAN          |
| Q02790                                                                 | 2             | 3.5005           | R.LAEEENKAK.A            | 20           | FKBP4_HUMAN          |
| <b><i>FK506-binding protein 5 - Homo sapiens (Human)</i></b>           |               |                  |                          |              |                      |
| Q13451                                                                 | 2             | 3.4918           | K.GTDSQAMEEEKPEGHV.-     | 2            | FKBP5_HUMAN          |
| <b><i>FK506-binding protein 7 precursor - Homo sapiens (Human)</i></b> |               |                  |                          |              |                      |
| Q9Y680                                                                 | 3             | 4.5266           | K.KGDLLNAHYDGYLAK.D      | 2            | FKBP7_HUMAN          |
| Q9Y680                                                                 | 2             | 3.0567           | K.SYQDAVLEDIFK.K         | 1            | FKBP7_HUMAN          |
| Q9Y680                                                                 | 2             | 3.1916           | K.WFVLGVGQVIK.G          | 2            | FKBP7_HUMAN          |
| Q9Y680                                                                 | 3             | 4.4422           | R.DKSYQDAVLEDIFKK.N      | 1            | FKBP7_HUMAN          |
| <b><i>FKSG19 - Homo sapiens (Human)</i></b>                            |               |                  |                          |              |                      |
| Q96A48                                                                 | 2             | 3.1153           | R.LSNTGEYESQR.F          | 2            | Q96A48_HUMAN         |
| <b><i>FLJ31222 protein - Homo sapiens (Human)</i></b>                  |               |                  |                          |              |                      |
| Q0II11                                                                 | 2             | 2.7341           | R.RGQAPPEGGAR.P          | 1            | Q0II11_HUMAN         |
| <b><i>FLJ35785 protein - Homo sapiens (Human)</i></b>                  |               |                  |                          |              |                      |

| <i>Accession No*</i>                                                         | <i>Charge</i> | <i>XC(Max)**</i> | <i>Peptide*</i>                   | <i>TC***</i> | <i>Reference No*</i> |
|------------------------------------------------------------------------------|---------------|------------------|-----------------------------------|--------------|----------------------|
| A4QMR6                                                                       | 2             | 2.8188           | K.STLQLEQQVKELK.K                 | 1            | A4QMR6_HUMAN         |
| <b><i>FLJ38482 protein - Homo sapiens (Human)</i></b>                        |               |                  |                                   |              |                      |
| Q8IY95                                                                       | 2             | 2.8943           | R.TISSLEEIVEK.Q                   | 1            | Q8IY95_HUMAN         |
| Q8IY95                                                                       | 2             | 2.7396           | R.HNALLSK.R                       | 1            | Q8IY95_HUMAN         |
| <b><i>FLJ43692 protein - Homo sapiens (Human)</i></b>                        |               |                  |                                   |              |                      |
| A5YM69                                                                       | 2             | 3.1711           | R.LSATQQSELR.D                    | 1            | A5YM69_HUMAN         |
| A5YM69                                                                       | 2             | 3.5611           | K.AQGQGGPEQGEER.K                 | 2            | A5YM69_HUMAN         |
| A5YM69                                                                       | 3             | 4.5248           | R.ELQVPEENRADSQDEKSQTFGLGK.S      | 1            | A5YM69_HUMAN         |
| A5YM69                                                                       | 2             | 4.7196           | R.KAQGGGPEQGEER.K                 | 5            | A5YM69_HUMAN         |
| <b><i>Follistatin-related protein 1 precursor - Homo sapiens (Human)</i></b> |               |                  |                                   |              |                      |
| Q12841                                                                       | 2             | 3.1113           | K.GAQTQTEEMTR.Y                   | 1            | FSTL1_HUMAN          |
| Q12841                                                                       | 2             | 3.5342           | K.GAQTQTEEM#TR.Y                  | 2            | FSTL1_HUMAN          |
| <b><i>Forkhead box protein K1 - Homo sapiens (Human)</i></b>                 |               |                  |                                   |              |                      |
| P85037                                                                       | 3             | 5.5763           | R.SRVEEPSGAVTTPAGVIAAAGPQGPGTGE.- | 1            | FOXK1_HUMAN          |
| <b><i>Forkhead box protein K2 - Homo sapiens (Human)</i></b>                 |               |                  |                                   |              |                      |
| Q01167                                                                       | 3             | 4.1501           | K.VKVEIPAIGHATLGTASR.I            | 2            | FOXK2_HUMAN          |
| Q01167                                                                       | 2             | 2.8491           | R.EGSPAPLEPEPGAAQPK.L             | 1            | FOXK2_HUMAN          |
| <b><i>Forkhead box protein O1A - Homo sapiens (Human)</i></b>                |               |                  |                                   |              |                      |
| Q12778                                                                       | 3             | 4.0074           | K.ELLTSDSPPHNDIMTPVDPGVAQPNSR.V   | 1            | FOXO1_HUMAN          |
| <b><i>Formin-2 - Homo sapiens (Human)</i></b>                                |               |                  |                                   |              |                      |
| Q9NZ56                                                                       | 2             | 3.1398           | R.GSPGEEWAPEVGEDAPQR.L            | 1            | FMN2_HUMAN           |
| Q9NZ56                                                                       | 3             | 4.1684           | R.VGGRPIAEDVETAAGAQDGQR.T         | 1            | FMN2_HUMAN           |
| <b><i>Formin-binding protein 1-like - Homo sapiens (Human)</i></b>           |               |                  |                                   |              |                      |
| Q5T0N5                                                                       | 2             | 3.509            | K.NPQMGDPGSLQPK.L                 | 2            | FBP1L_HUMAN          |
| Q5T0N5                                                                       | 2             | 3.5381           | K.AIYPFDGHNEGTLAMK.E              | 2            | FBP1L_HUMAN          |
| Q5T0N5                                                                       | 2             | 3.0034           | K.LAETMNNIDR.L                    | 2            | FBP1L_HUMAN          |
| Q5T0N5                                                                       | 3             | 4.098            | K.MKDVYEKNPQMGDPGSLQPK.L          | 2            | FBP1L_HUMAN          |
| Q5T0N5                                                                       | 3             | 5.0815           | K.M#KDVYEKNPQMGDPGSLQPK.L         | 2            | FBP1L_HUMAN          |
| Q5T0N5                                                                       | 3             | 3.7265           | R.ELQKESDQKDALNK.M                | 1            | FBP1L_HUMAN          |
| Q5T0N5                                                                       | 2             | 3.3012           | R.ESPEGSYTDANQEV.R.G              | 4            | FBP1L_HUMAN          |
| Q5T0N5                                                                       | 2             | 3.2062           | R.QNGEEGYVPTSIDVTLEK.N            | 2            | FBP1L_HUMAN          |
| Q5T0N5                                                                       | 2             | 2.9318           | K.LAETM#NNIDR.L                   | 1            | FBP1L_HUMAN          |
| Q5T0N5                                                                       | 3             | 4.0829           | K.MKDVYEKNPQM#GDPGSLQPK.L         | 2            | FBP1L_HUMAN          |

| <i>Accession No*</i>                                                                         | <i>Charge</i> | <i>XC(Max)**</i> | <i>Peptide*</i>                     | <i>TC***</i> | <i>Reference No*</i> |
|----------------------------------------------------------------------------------------------|---------------|------------------|-------------------------------------|--------------|----------------------|
| Q5T0N5                                                                                       | 2             | 2.9354           | K.ESDQKDALNK.M                      | 2            | FBP1L_HUMAN          |
| <b><i>Formin-binding protein 4 - Homo sapiens (Human)</i></b>                                |               |                  |                                     |              |                      |
| Q8N3X1                                                                                       | 3             | 4.0462           | K.GVAASLLAPLLPEGIKEEEER.W           | 1            | FNBP4_HUMAN          |
| Q8N3X1                                                                                       | 2             | 4.5151           | R.ALEEGDGSVSGSSPR.S                 | 2            | FNBP4_HUMAN          |
| Q8N3X1                                                                                       | 2             | 3.0826           | R.NANFEALPEDWR.A                    | 1            | FNBP4_HUMAN          |
| <b><i>Forty-two-three domain-containing protein 1 - Homo sapiens (Human)</i></b>             |               |                  |                                     |              |                      |
| Q96QD9                                                                                       | 2             | 3.0979           | K.GVPLQFDINSVGK.Q                   | 1            | FYTD1_HUMAN          |
| <b><i>Four and a half LIM domains protein 3 - Homo sapiens (Human)</i></b>                   |               |                  |                                     |              |                      |
| Q13643                                                                                       | 2             | 3.7537           | K.RPIVGLGGGK.Y                      | 1            | FHL3_HUMAN           |
| <b><i>Fragile X mental retardation syndrome-related protein 1 - Homo sapiens (Human)</i></b> |               |                  |                                     |              |                      |
| P51114                                                                                       | 2             | 4.5733           | K.AINGPTSASGDDISK.L                 | 4            | FXR1_HUMAN           |
| <b><i>Fragile X mental retardation syndrome-related protein 2 - Homo sapiens (Human)</i></b> |               |                  |                                     |              |                      |
| P51116                                                                                       | 3             | 3.8151           | R.TKPSEDSLSGQK.G                    | 1            | FXR2_HUMAN           |
| P51116                                                                                       | 2             | 2.7814           | R.TKPSEDSLGGQKGDVSK.L               | 1            | FXR2_HUMAN           |
| P51116                                                                                       | 3             | 4.153            | R.YNSSSISVLLKDPDSNPYSLLDTSEPEPPVDSE | 1            | FXR2_HUMAN           |
| <b><i>FRAS1-related extracellular matrix protein 2 precursor - Homo sapiens (Human)</i></b>  |               |                  |                                     |              |                      |
| Q5SZK8                                                                                       | 2             | 3.8639           | R.NLDFAPGVNMQPVR.V                  | 1            | FREM2_HUMAN          |
| Q5SZK8                                                                                       | 3             | 4.3329           | R.DILEGSVVYHTSGEIGLLPK.A            | 2            | FREM2_HUMAN          |
| <b><i>Frataxin, mitochondrial precursor - Homo sapiens (Human)</i></b>                       |               |                  |                                     |              |                      |
| Q16595                                                                                       | 2             | 4.4744           | K.TKLDLSSLAYSGK.D                   | 2            | FRDA_HUMAN           |
| Q16595                                                                                       | 2             | 4.2548           | K.LDLSSLAYSGKDA.-                   | 2            | FRDA_HUMAN           |
| Q16595                                                                                       | 2             | 3.5549           | K.LGGDLGTYVINK.Q                    | 2            | FRDA_HUMAN           |
| Q16595                                                                                       | 2             | 2.9067           | K.QIWLSSPSSGPK.R                    | 1            | FRDA_HUMAN           |
| Q16595                                                                                       | 2             | 3.9857           | K.SGTLGHGPGSLDETTYER.L              | 5            | FRDA_HUMAN           |
| Q16595                                                                                       | 2             | 5.3884           | K.TKLDLSSLAYSGKDA.-                 | 6            | FRDA_HUMAN           |
| <b><i>Frizzled-6 precursor - Homo sapiens (Human)</i></b>                                    |               |                  |                                     |              |                      |
| O60353                                                                                       | 3             | 5.9446           | R.LSGEQVDGKGQAGSVSESAR.S            | 1            | FZD6_HUMAN           |
| <b><i>Fructose-1,6-bisphosphatase 1 - Homo sapiens (Human)</i></b>                           |               |                  |                                     |              |                      |
| P09467                                                                                       | 3             | 4.5438           | K.AGIAHLYGIAGSTNVTGDQVK.K           | 2            | F16P1_HUMAN          |
| P09467                                                                                       | 2             | 4.7643           | R.APVILGSPDDVLEFLK.V                | 5            | F16P1_HUMAN          |
| P09467                                                                                       | 2             | 4.5745           | K.EAVLDVIPTDIHQ.R.A                 | 5            | F16P1_HUMAN          |
| <b><i>Fructose-bisphosphate aldolase A - Homo sapiens (Human)</i></b>                        |               |                  |                                     |              |                      |

| <i>Accession No*</i>                                                                  | <i>Charge</i> | <i>XC(Max)**</i> | <i>Peptide*</i>                | <i>TC***</i> | <i>Reference No*</i> |
|---------------------------------------------------------------------------------------|---------------|------------------|--------------------------------|--------------|----------------------|
| P04075                                                                                | 3             | 4.069            | K.RLQSIGTENTEENRR.F            | 1            | ALDOA_HUMAN          |
| P04075                                                                                | 2             | 3.7331           | K.GILAADESTGSIK.R              | 2            | ALDOA_HUMAN          |
| P04075                                                                                | 2             | 3.0697           | K.AAQEEYVKR.A                  | 1            | ALDOA_HUMAN          |
| <b><i>Fructose-bisphosphate aldolase B - Homo sapiens (Human)</i></b>                 |               |                  |                                |              |                      |
| P05062                                                                                | 2             | 4.7906           | K.ELSEIAQSIVANGK.G             | 4            | ALDOB_HUMAN          |
| P05062                                                                                | 2             | 4.1923           | K.AANKEATQEAFMK.R              | 2            | ALDOB_HUMAN          |
| P05062                                                                                | 2             | 3.0849           | R.IKVENTEENRR.Q                | 2            | ALDOB_HUMAN          |
| P05062                                                                                | 2             | 4.353            | R.ALQASALAAWGGK.A              | 3            | ALDOB_HUMAN          |
| P05062                                                                                | 2             | 4.5611           | K.GILAADESVGTM#GNR.L           | 4            | ALDOB_HUMAN          |
| <b><i>Fructose-bisphosphate aldolase C - Homo sapiens (Human)</i></b>                 |               |                  |                                |              |                      |
| P09972                                                                                | 2             | 3.3756           | K.GVVPLAGTDGETTTQGLDGLSER.C    | 1            | ALDOC_HUMAN          |
| <b><i>Fumarylacetoacetase - Homo sapiens (Human)</i></b>                              |               |                  |                                |              |                      |
| P16930                                                                                | 2             | 2.8915           | R.VFLQNLLSVSQAR.L              | 1            | FAAA_HUMAN           |
| <b><i>FYVE and coiled-coil domain-containing protein 1 - Homo sapiens (Human)</i></b> |               |                  |                                |              |                      |
| Q9BQS8                                                                                | 2             | 4.0352           | R.AAVSQQGEQLQTER.E             | 4            | FYCO1_HUMAN          |
| Q9BQS8                                                                                | 2             | 4.2155           | K.GQQQGVGPPTDNEAR.E            | 2            | FYCO1_HUMAN          |
| Q9BQS8                                                                                | 3             | 3.7223           | R.EGALQEERADEAQQREEELR.A       | 1            | FYCO1_HUMAN          |
| Q9BQS8                                                                                | 2             | 3.3141           | K.QWEVTQATQNTVK.E              | 2            | FYCO1_HUMAN          |
| Q9BQS8                                                                                | 3             | 3.861            | K.QLIQDKDHLSQQVGMLEL.L         | 1            | FYCO1_HUMAN          |
| Q9BQS8                                                                                | 2             | 3.7053           | K.LQALQADYQALQQR.E             | 1            | FYCO1_HUMAN          |
| Q9BQS8                                                                                | 3             | 4.293            | K.GRQEPIPSDAAQEMQELGEK.L       | 1            | FYCO1_HUMAN          |
| Q9BQS8                                                                                | 4             | 4.9632           | K.GRQEPIPSDAAQEMQELGEKLQALER.E | 1            | FYCO1_HUMAN          |
| Q9BQS8                                                                                | 2             | 3.1063           | R.LQAQVVDLQAK.M                | 1            | FYCO1_HUMAN          |
| <b><i>FYVE, RhoGEF and PH domain-containing protein 4 - Homo sapiens (Human)</i></b>  |               |                  |                                |              |                      |
| Q96M96                                                                                | 2             | 3.5593           | R.HGLTTTPQQK.L                 | 3            | FGD4_HUMAN           |
| Q96M96                                                                                | 2             | 3.2291           | K.ESAVNLNAPR.T                 | 2            | FGD4_HUMAN           |
| <b><i>FYVE, RhoGEF and PH domain-containing protein 5 - Homo sapiens (Human)</i></b>  |               |                  |                                |              |                      |
| Q6ZNL6                                                                                | 2             | 3.3298           | K.GLESEQAPK.L                  | 1            | FGD5_HUMAN           |
| Q6ZNL6                                                                                | 2             | 4.4701           | K.TLLSLEGKPLEASR.A             | 1            | FGD5_HUMAN           |
| Q6ZNL6                                                                                | 2             | 2.7438           | R.ASVYLNDLSLNK.C               | 1            | FGD5_HUMAN           |
| Q6ZNL6                                                                                | 3             | 4.5167           | R.SRPPFLPLTKPR.S               | 1            | FGD5_HUMAN           |
| Q6ZNL6                                                                                | 2             | 5.3405           | R.VPLREDEPKDEGSVGNK.A          | 3            | FGD5_HUMAN           |
| <b><i>G patch domain and KOW motifs-containing protein - Homo sapiens (Human)</i></b> |               |                  |                                |              |                      |



| <i>Accession No*</i>                                                                    | <i>Charge</i> | <i>XC(Max)**</i> | <i>Peptide*</i>            | <i>TC***</i> | <i>Reference No*</i> |
|-----------------------------------------------------------------------------------------|---------------|------------------|----------------------------|--------------|----------------------|
| Q92917                                                                                  | 2             | 3.2401           | R.ELQSVKPEAPK.E            | 2            | GPKOW_HUMAN          |
| <b><i>G patch domain-containing protein 8 - Homo sapiens (Human)</i></b>                |               |                  |                            |              |                      |
| Q9UKJ3                                                                                  | 2             | 3.5732           | K.ATGPPSQNSNIGTGR.G        | 2            | GPTC8_HUMAN          |
| <b><i>G protein-regulated inducer of neurite outgrowth 3 - Homo sapiens (Human)</i></b> |               |                  |                            |              |                      |
| Q6ZVF9                                                                                  | 2             | 4.0865           | R.APEHFQEQLR.V             | 4            | GRIN3_HUMAN          |
| Q6ZVF9                                                                                  | 3             | 4.5968           | K.TSLIAASGKEDDLGEPQAASPR.H | 2            | GRIN3_HUMAN          |
| Q6ZVF9                                                                                  | 2             | 4.4827           | K.SQESGGTESAANPTSPIR.K     | 5            | GRIN3_HUMAN          |
| Q6ZVF9                                                                                  | 3             | 4.7384           | R.FKEASTMTNQAEESEIKEVPSR.A | 3            | GRIN3_HUMAN          |
| Q6ZVF9                                                                                  | 2             | 2.9797           | K.FETRPSEFAEK.T            | 2            | GRIN3_HUMAN          |
| Q6ZVF9                                                                                  | 2             | 3.562            | R.SVSTSPSILTAFLK.E         | 2            | GRIN3_HUMAN          |
| Q6ZVF9                                                                                  | 2             | 2.9295           | K.NQESTLEENR.Q             | 2            | GRIN3_HUMAN          |
| Q6ZVF9                                                                                  | 3             | 4.8563           | R.VVSHSSSPVGGPEGER.Q       | 6            | GRIN3_HUMAN          |
| Q6ZVF9                                                                                  | 2             | 3.4632           | R.KNQESTLEENR.Q            | 2            | GRIN3_HUMAN          |
| Q6ZVF9                                                                                  | 2             | 4.8607           | K.SQESGGTESAANPTSPIR.K.N   | 2            | GRIN3_HUMAN          |
| <b><i>Galectin-1 - Homo sapiens (Human)</i></b>                                         |               |                  |                            |              |                      |
| P09382                                                                                  | 1             | 2.8251           | K.SFVLNLGK.D               | 2            | LEG1_HUMAN           |
| P09382                                                                                  | 1             | 2.2048           | R.GEVAPDAK.S               | 1            | LEG1_HUMAN           |
| P09382                                                                                  | 2             | 4.9781           | R.LNLEAINYM#AADGDFK.I      | 9            | LEG1_HUMAN           |
| P09382                                                                                  | 2             | 6.0343           | R.LNLEAINYMAADGDFK.I       | 85           | LEG1_HUMAN           |
| P09382                                                                                  | 1             | 2.7316           | K.LPDGYEFK.F               | 3            | LEG1_HUMAN           |
| P09382                                                                                  | 2             | 2.9054           | R.VRGEVAPDAK.S             | 4            | LEG1_HUMAN           |
| P09382                                                                                  | 2             | 3.7416           | K.LPDGYEFKFPNR.L           | 2            | LEG1_HUMAN           |
| P09382                                                                                  | 2             | 3.7192           | K.DGGAWGTEQR.E             | 9            | LEG1_HUMAN           |
| <b><i>Galectin-2 - Homo sapiens (Human)</i></b>                                         |               |                  |                            |              |                      |
| P05162                                                                                  | 3             | 4.5028           | R.LGHSHLSYLSVR.G           | 1            | LEG2_HUMAN           |
| P05162                                                                                  | 2             | 4.2965           | K.LPDGHELTFPNR.L           | 5            | LEG2_HUMAN           |
| P05162                                                                                  | 2             | 2.7838           | R.GGFNM#SSFK.L             | 1            | LEG2_HUMAN           |
| P05162                                                                                  | 2             | 3.2082           | R.GGFNMSSFK.L              | 1            | LEG2_HUMAN           |
| <b><i>Galectin-3 - Homo sapiens (Human)</i></b>                                         |               |                  |                            |              |                      |
| P17931                                                                                  | 2             | 2.9295           | K.IQVLVEPDHFK.V            | 1            | LEG3_HUMAN           |
| <b><i>Galectin-3-binding protein precursor - Homo sapiens (Human)</i></b>               |               |                  |                            |              |                      |
| Q08380                                                                                  | 3             | 3.9194           | K.TLQALEFHTVPFQLLAR.Y      | 1            | LG3BP_HUMAN          |
| Q08380                                                                                  | 3             | 4.4732           | R.ELSEALGQIFDSQR.G         | 2            | LG3BP_HUMAN          |
| Q08380                                                                                  | 2             | 4.3865           | R.LADGGATNQGR.V            | 18           | LG3BP_HUMAN          |

Accession No\* Charge XC(Max)\*\* Peptide\* TC\*\*\* Reference No\*

***Gamma-adducin - Homo sapiens (Human)***

|        |   |        |                                    |   |            |
|--------|---|--------|------------------------------------|---|------------|
| Q9UEY8 | 3 | 3.8397 | K.IEDPNQFVPLNTNPNEVLEK.R           | 2 | ADDG_HUMAN |
| Q9UEY8 | 2 | 4.0361 | R.LSTSTTIEITIK.S                   | 2 | ADDG_HUMAN |
| Q9UEY8 | 2 | 3.5823 | K.VGEIEFEGLMR.T                    | 2 | ADDG_HUMAN |
| Q9UEY8 | 3 | 4.4434 | K.SPEKIEEVLSPGSPSK.S               | 4 | ADDG_HUMAN |
| Q9UEY8 | 4 | 6.3286 | K.QQGLEDAEQELLSDDASSVSQIQSQTQSPQNV | 1 | ADDG_HUMAN |
| Q9UEY8 | 2 | 4.2894 | K.IEEVLSPEGSPSK.S                  | 3 | ADDG_HUMAN |
| Q9UEY8 | 2 | 2.8586 | R.WLNSPNTYMK.V                     | 1 | ADDG_HUMAN |
| Q9UEY8 | 3 | 4.3531 | K.IEDPNQFVPLNTNPNEVLEKR.N          | 1 | ADDG_HUMAN |
| Q9UEY8 | 2 | 3.2004 | R.INENDPEYIR.E                     | 2 | ADDG_HUMAN |
| Q9UEY8 | 3 | 5.5214 | K.VSGGTPIKIEDPNQFVPLNTNPNEVLEKR.N  | 2 | ADDG_HUMAN |

***Gamma-glutamyl hydrolase precursor - Homo sapiens (Human)***

|        |   |        |                   |   |           |
|--------|---|--------|-------------------|---|-----------|
| Q92820 | 2 | 4.0871 | K.NLDGISHAPNAVK.T | 2 | GGH_HUMAN |
|--------|---|--------|-------------------|---|-----------|

***Gamma-glutamyltranspeptidase 1 precursor - Homo sapiens (Human)***

|        |   |        |                  |   |            |
|--------|---|--------|------------------|---|------------|
| P19440 | 2 | 2.773  | R.KAEVINAR.E     | 1 | GGT1_HUMAN |
| P19440 | 2 | 3.0944 | R.LFQPSIQLAR.Q   | 3 | GGT1_HUMAN |
| P19440 | 2 | 2.9114 | K.GGLSVAVPGEIR.G | 1 | GGT1_HUMAN |
| P19440 | 2 | 2.9069 | R.GYELAHQR.H     | 2 | GGT1_HUMAN |

***Gamma-synuclein - Homo sapiens (Human)***

|        |   |        |                            |   |            |
|--------|---|--------|----------------------------|---|------------|
| O76070 | 2 | 4.8575 | K.EKEEVAEEAQSAGGD.-        | 6 | SYUG_HUMAN |
| O76070 | 1 | 2.4053 | K.EGVVGAVEK.T              | 2 | SYUG_HUMAN |
| O76070 | 2 | 3.3042 | K.ENVVQSVTSVAEK.T          | 1 | SYUG_HUMAN |
| O76070 | 2 | 4.8969 | K.EQANAVSEAVVSSVNTVATK.T   | 2 | SYUG_HUMAN |
| O76070 | 2 | 5.3376 | K.TKENVVQSVTSVAEK.T        | 4 | SYUG_HUMAN |
| O76070 | 3 | 5.3644 | K.TKEQANAVSEAVVSSVNTVATK.T | 4 | SYUG_HUMAN |
| O76070 | 2 | 4.3479 | K.TVEEAENIAVTSGVVR.K       | 2 | SYUG_HUMAN |
| O76070 | 3 | 4.0846 | R.KEDLRPSAPQQEGEASK.E      | 2 | SYUG_HUMAN |

***Gamma-tubulin complex component 6 - Homo sapiens (Human)***

|        |   |        |                    |   |            |
|--------|---|--------|--------------------|---|------------|
| Q96RT7 | 2 | 3.5888 | R.VGENVSDVAPTQPR.W | 2 | GCP6_HUMAN |
| Q96RT7 | 2 | 3.2389 | R.AALEEGSSQPTER.L  | 2 | GCP6_HUMAN |

***Ganglioside GM2 activator precursor - Homo sapiens (Human)***

|        |   |        |                          |   |            |
|--------|---|--------|--------------------------|---|------------|
| P17900 | 2 | 2.8526 | K.SEFFVDPLELPSWLTTGNYR.I | 1 | SAP3_HUMAN |
| P17900 | 3 | 3.7152 | K.VDLVLEKEVAGLWIK.I      | 1 | SAP3_HUMAN |

| <i>Accession No*</i>                                                               | <i>Charge</i> | <i>XC(Max)**</i> | <i>Peptide*</i>                 | <i>TC***</i> | <i>Reference No*</i> |
|------------------------------------------------------------------------------------|---------------|------------------|---------------------------------|--------------|----------------------|
| <b><i>Gap junction beta-1 protein - Homo sapiens (Human)</i></b>                   |               |                  |                                 |              |                      |
| P08034                                                                             | 2             | 3.3427           | R.RSPGTGAGLAEK.S                | 1            | CXB1_HUMAN           |
| <b><i>GatC-like protein - Homo sapiens (Human)</i></b>                             |               |                  |                                 |              |                      |
| O43716                                                                             | 2             | 3.4466           | R.LALVDFGSR.E                   | 3            | GATCL_HUMAN          |
| O43716                                                                             | 2             | 3.8384           | K.LDEQEPFPHS.-                  | 3            | GATCL_HUMAN          |
| O43716                                                                             | 2             | 2.8324           | R.AVDTDGVEPMESVLEDR.C           | 2            | GATCL_HUMAN          |
| O43716                                                                             | 2             | 2.8756           | R.ITAAVIEHLER.L                 | 1            | GATCL_HUMAN          |
| <b><i>GCNI-like protein 1 - Homo sapiens (Human)</i></b>                           |               |                  |                                 |              |                      |
| Q92616                                                                             | 3             | 4.2423           | R.VLPQLISTITASVQNPALR.L         | 1            | GCN1L_HUMAN          |
| <b><i>GC-rich sequence DNA-binding factor - Homo sapiens (Human)</i></b>           |               |                  |                                 |              |                      |
| P16383                                                                             | 2             | 3.5451           | K.IPDAAFIQAAR.R                 | 2            | GCF_HUMAN            |
| <b><i>GC-rich sequence DNA-binding factor homolog - Homo sapiens (Human)</i></b>   |               |                  |                                 |              |                      |
| Q9Y5B6                                                                             | 2             | 3.6806           | R.ASLLSFQDEEEENEVFK.V           | 1            | GCFC_HUMAN           |
| <b><i>General transcription factor 3C polypeptide 3 - Homo sapiens (Human)</i></b> |               |                  |                                 |              |                      |
| Q9Y5Q9                                                                             | 3             | 4.3756           | K.SQDKDVNEGETSDGVRK.S           | 1            | TF3C3_HUMAN          |
| <b><i>General transcription factor II-1 - Homo sapiens (Human)</i></b>             |               |                  |                                 |              |                      |
| P78347                                                                             | 2             | 3.5079           | K.APSYLEISSMR.R                 | 2            | GTF2L_HUMAN          |
| <b><i>Genethonin-1 - Homo sapiens (Human)</i></b>                                  |               |                  |                                 |              |                      |
| O95210                                                                             | 2             | 4.8558           | R.NESLESPMGEGWFQK.G             | 4            | GET1_HUMAN           |
| O95210                                                                             | 3             | 4.6817           | R.EHVPSGQFPDTEAPATSETSNSR.S     | 3            | GET1_HUMAN           |
| O95210                                                                             | 2             | 3.1686           | R.NESLESPM#GEWGFQK.G            | 2            | GET1_HUMAN           |
| <b><i>Gephyrin - Homo sapiens (Human)</i></b>                                      |               |                  |                                 |              |                      |
| Q9NQX3                                                                             | 1             | 2.3279           | R.DVTPEATK.E                    | 2            | GEPH_HUMAN           |
| Q9NQX3                                                                             | 2             | 3.217            | R.DVTPEATKEVIER.E               | 2            | GEPH_HUMAN           |
| Q9NQX3                                                                             | 2             | 3.4159           | K.TLIINLPGSK.K                  | 3            | GEPH_HUMAN           |
| Q9NQX3                                                                             | 2             | 4.2595           | R.DTASLSTTPSESPR.A              | 10           | GEPH_HUMAN           |
| <b><i>GH3 domain-containing protein precursor - Homo sapiens (Human)</i></b>       |               |                  |                                 |              |                      |
| Q8N2G8                                                                             | 2             | 2.7684           | R.VAWGALVWAATWQRRR.L            | 1            | GHDC_HUMAN           |
| <b><i>Girdin - Homo sapiens (Human)</i></b>                                        |               |                  |                                 |              |                      |
| Q3V6T2                                                                             | 3             | 3.7261           | R.KTEDTYFISSAGKPTPGTQGK.I       | 1            | GRDN_HUMAN           |
| Q3V6T2                                                                             | 3             | 3.781            | R.LPISVDSPAAADSNTTAASNVDKQESR.N | 1            | GRDN_HUMAN           |

Accession No\* Charge XC(Max)\*\* Peptide\* TC\*\*\* Reference No\*

***Glial maturation factor beta - Homo sapiens (Human)***

P60983 1 2.1978 R.FIVYSYK.Y 1 GMFB\_HUMAN

***Glial fibrillary acidic protein - Homo sapiens (Human)***

P14136 2 4.3118 K.LADVYQAE LR.E 3 GFAP\_HUMAN

P14136 3 4.659 R.LEVERDNLAQDLATVR.Q 1 GFAP\_HUMAN

P14136 2 3.1413 K.FADLTDAAR.N 2 GFAP\_HUMAN

P14136 2 3.1499 R.DGEVIKESK.Q 1 GFAP\_HUMAN

P14136 2 3.9838 K.ALAAELNQLR.A 2 GFAP\_HUMAN

***Glucocorticoid receptor - Homo sapiens (Human)***

P04150 2 4.0713 K.SSASTAVSAAPEKEFPK.T 2 GCR\_HUMAN

P04150 3 4.7498 K.THSDVSSEQQHLK.G 4 GCR\_HUMAN

***Glucocorticoid receptor DNA-binding factor 1 - Homo sapiens (Human)***

Q9NRY4 2 2.9738 R.NEEENIYVPHDSTQGK.I 1 GRLF1\_HUMAN

***Glucocorticoid-induced transcript 1 protein - Homo sapiens (Human)***

Q86VQ1 2 4.0258 R.GPSPSSPTPPAAAAPAEQAPR.A 2 GLC11\_HUMAN

***Glucose-6-phosphate isomerase - Homo sapiens (Human)***

P06744 2 4.3663 K.ILLANFLAQTEALMR.G 1 G6PI\_HUMAN

***Glucosidase 2 subunit beta precursor - Homo sapiens (Human)***

P14314 2 3.6306 K.ETM#VTSTTEPSR.C 3 GLU2B\_HUMAN

P14314 2 2.7278 K.DMEESIR.N 1 GLU2B\_HUMAN

P14314 2 3.7053 R.SLKDMEEESIR.N 5 GLU2B\_HUMAN

P14314 2 3.6907 R.SLKDM#EESIR.N 3 GLU2B\_HUMAN

P14314 2 3.147 R.SEALPTDLPAPSAPDLTEPK.E 1 GLU2B\_HUMAN

P14314 2 2.9343 R.NKFEEAER.S 3 GLU2B\_HUMAN

P14314 2 4.7273 K.LGGSPSTSLGTWGSWIGPDHDKFSAMK.Y 3 GLU2B\_HUMAN

P14314 1 3.9248 K.ETMVTSTTEPSR.C 6 GLU2B\_HUMAN

P14314 3 4.7692 K.LGGSPSTSLGTWGSWIGPDHDK.F 4 GLU2B\_HUMAN

***Glutamate [NMDA] receptor subunit epsilon-1 precursor - Homo sapiens (Human)***

Q12879 2 2.855 K.FNQKGVEDALVSLK.T 1 NMDE1\_HUMAN

***Glutamate dehydrogenase 1, mitochondrial precursor - Homo sapiens (Human)***

P00367 3 4.7539 R.GASIVEDKLVEDLR.T 3 DHE3\_HUMAN

P00367 3 5.4077 R.ISGASEKDIVHSGLAYTMER.S 1 DHE3\_HUMAN

Accession No\* Charge XC(Max)\*\* Peptide\* TC\*\*\* Reference No\*

***Glutaminase kidney isoform, mitochondrial precursor - Homo sapiens (Human)***

|        |   |        |                              |    |            |
|--------|---|--------|------------------------------|----|------------|
| O94925 | 3 | 4.1371 | K.DGPGETDAFGNSEGKELVASGENK.I | 3  | GLSK_HUMAN |
| O94925 | 2 | 4.2062 | K.DGPGETDAFGNSEGK.E          | 11 | GLSK_HUMAN |
| O94925 | 2 | 5.6642 | K.GSTHPQPGVSPPAAPAAPGPK.D    | 3  | GLSK_HUMAN |

***Glutamine-rich protein 1 - Homo sapiens (Human)***

|        |   |        |                 |   |             |
|--------|---|--------|-----------------|---|-------------|
| Q2TAL8 | 2 | 3.5155 | R.MKEFLDSLASK.G | 2 | QRIC1_HUMAN |
|--------|---|--------|-----------------|---|-------------|

***Glutamyl aminopeptidase - Homo sapiens (Human)***

|        |   |        |                          |   |            |
|--------|---|--------|--------------------------|---|------------|
| Q07075 | 2 | 3.5631 | R.ASLIDDAFALAR.A         | 2 | AMPE_HUMAN |
| Q07075 | 2 | 4.6054 | K.IAIPDFGTGAMENWGLITYR.E | 2 | AMPE_HUMAN |
| Q07075 | 2 | 3.6639 | K.TSDFWAALEEASR.L        | 2 | AMPE_HUMAN |
| Q07075 | 2 | 2.987  | R.QMGYPVLNVNGVK.N        | 1 | AMPE_HUMAN |
| Q07075 | 2 | 3.5868 | K.RPSGDQVQVR.R           | 1 | AMPE_HUMAN |
| Q07075 | 2 | 2.794  | K.TQDVFTVIR.Y            | 1 | AMPE_HUMAN |

***Glutaredoxin-1 - Homo sapiens (Human)***

|        |   |        |                                   |    |             |
|--------|---|--------|-----------------------------------|----|-------------|
| P35754 | 3 | 4.124  | K.QGLLEFVDITATNHTNEIQDYLQQLTGAR.T | 1  | GLRX1_HUMAN |
| P35754 | 1 | 3.6329 | R.LKQIGALQ.-                      | 10 | GLRX1_HUMAN |
| P35754 | 2 | 3.6798 | K.DCIGGCSDLVSLQQSGELLTR.L         | 13 | GLRX1_HUMAN |
| P35754 | 3 | 4.2543 | R.VFIGKDCIGGCSDLVSLQQSGELLTR.L    | 2  | GLRX1_HUMAN |
| P35754 | 2 | 4.6637 | R.AQEILSQLPIK.Q                   | 5  | GLRX1_HUMAN |

***Glutaredoxin-related protein 5 - Homo sapiens (Human)***

|        |   |        |                         |   |             |
|--------|---|--------|-------------------------|---|-------------|
| Q86SX6 | 2 | 4.9669 | R.DYAAYNVLDDPELR.Q      | 8 | GLRX5_HUMAN |
| Q86SX6 | 3 | 4.5234 | R.LHGVRDYAAYNVLDDPELR.Q | 1 | GLRX5_HUMAN |
| Q86SX6 | 2 | 3.9858 | K.LGIHSALLDEK.K         | 4 | GLRX5_HUMAN |
| Q86SX6 | 3 | 4.6342 | K.LGIHSALLDEKK.D        | 1 | GLRX5_HUMAN |
| Q86SX6 | 2 | 4.2782 | K.LGIHSALLDEKKDQDSK.-   | 4 | GLRX5_HUMAN |

***Glutathione peroxidase 1 - Homo sapiens (Human)***

|        |   |        |                       |   |            |
|--------|---|--------|-----------------------|---|------------|
| P07203 | 2 | 4.0638 | R.PLAGGEPVSLGSLR.G    | 2 | GPX1_HUMAN |
| P07203 | 3 | 3.7739 | K.YVRPGGGFEPNFMLFEK.C | 1 | GPX1_HUMAN |

***Glutathione peroxidase 3 precursor - Homo sapiens (Human)***

|        |   |        |                        |   |            |
|--------|---|--------|------------------------|---|------------|
| P22352 | 2 | 2.805  | K.FLVGPDGIPIM#R.W      | 1 | GPX3_HUMAN |
| P22352 | 2 | 4.1793 | K.YVRPGGGFVFPNFQLFEK.G | 2 | GPX3_HUMAN |
| P22352 | 2 | 3.3567 | K.MDILSYMR.R           | 1 | GPX3_HUMAN |

***Glutathione reductase, mitochondrial precursor - Homo sapiens (Human)***

| <i>Accession No*</i>                                                                            | <i>Charge</i> | <i>XC(Max)**</i> | <i>Peptide*</i>                 | <i>TC***</i> | <i>Reference No*</i> |
|-------------------------------------------------------------------------------------------------|---------------|------------------|---------------------------------|--------------|----------------------|
| P00390                                                                                          | 2             | 3.0613           | R.RAAELGAR.A                    | 1            | GSHR_HUMAN           |
| <b><i>Glutathione S-transferase A2 - Homo sapiens (Human)</i></b>                               |               |                  |                                 |              |                      |
| P09210                                                                                          | 1             | 2.3664           | K.LALIQEK.T                     | 1            | GSTA2_HUMAN          |
| <b><i>Glutathione S-transferase kappa 1 - Homo sapiens (Human)</i></b>                          |               |                  |                                 |              |                      |
| Q9Y2Q3                                                                                          | 2             | 3.0207           | R.NEDITEPQSILAAAEK.A            | 1            | GSTK1_HUMAN          |
| <b><i>Glutathione S-transferase P - Homo sapiens (Human)</i></b>                                |               |                  |                                 |              |                      |
| P09211                                                                                          | 3             | 4.571            | K.ALPGQLKPFETLLSQNQGGK.T        | 5            | GSTP1_HUMAN          |
| <b><i>Glyceraldehyde-3-phosphate dehydrogenase - Homo sapiens (Human)</i></b>                   |               |                  |                                 |              |                      |
| P04406                                                                                          | 2             | 4.5814           | R.VVDLMAHMASKE.-                | 2            | G3P_HUMAN            |
| P04406                                                                                          | 2             | 3.1575           | R.VVDLMAHM#ASKE.-               | 2            | G3P_HUMAN            |
| P04406                                                                                          | 2             | 3.9427           | K.LISWYDNEFGYSNR.V              | 4            | G3P_HUMAN            |
| <b><i>Glycerol-3-phosphate dehydrogenase [NAD+], cytoplasmic - Homo sapiens (Human)</i></b>     |               |                  |                                 |              |                      |
| P21695                                                                                          | 2             | 2.8093           | K.ANATGISLIK.G                  | 1            | GPDA_HUMAN           |
| P21695                                                                                          | 2             | 4.9293           | K.IVGGNAAQLAQFDPR.V             | 3            | GPDA_HUMAN           |
| P21695                                                                                          | 2             | 2.7872           | K.LISEVIGER.L                   | 1            | GPDA_HUMAN           |
| <b><i>Glycine cleavage system H protein, mitochondrial precursor - Homo sapiens (Human)</i></b> |               |                  |                                 |              |                      |
| P23434                                                                                          | 3             | 5.4845           | K.MTLSNPSELDELMSEEAYEKYIKSIEE.- | 2            | GCSH_HUMAN           |
| P23434                                                                                          | 2             | 4.9846           | K.MTLSNPSELDELMSEEAYEK.Y        | 10           | GCSH_HUMAN           |
| P23434                                                                                          | 2             | 3.6138           | R.TGPALLSVR.K                   | 1            | GCSH_HUMAN           |
| P23434                                                                                          | 2             | 4.2691           | K.M#TLSNPSELDELM#SEEAYEK.Y      | 1            | GCSH_HUMAN           |
| P23434                                                                                          | 3             | 4.206            | K.MTLSNPSELDELMSEEAYEKYIK.S     | 1            | GCSH_HUMAN           |
| <b><i>Glycogen synthase kinase-3 alpha - Homo sapiens (Human)</i></b>                           |               |                  |                                 |              |                      |
| P49840                                                                                          | 2             | 4.6588           | R.TSSFAEPGGGGGGGGGGPSSASGPGGTGG | 2            | GSK3A_HUMAN          |
| <b><i>Glycosyltransferase 25 domain-containing protein 1 - Homo sapiens (Human)</i></b>         |               |                  |                                 |              |                      |
| Q8NBJ5                                                                                          | 2             | 3.9198           | K.NSDVLQSPLDSAARDEL.-           | 2            | Q8NBJ5_HUMAN         |
| <b><i>Glycylpeptide N-tetradecanoyltransferase 1 - Homo sapiens (Human)</i></b>                 |               |                  |                                 |              |                      |
| P30419                                                                                          | 3             | 4.5204           | K.EKGSETDSAQDQPVK.M             | 6            | NMT1_HUMAN           |
| P30419                                                                                          | 2             | 4.0423           | K.GSETDSAQDQPVK.M               | 5            | NMT1_HUMAN           |
| <b><i>Golgi phosphoprotein 3 - Homo sapiens (Human)</i></b>                                     |               |                  |                                 |              |                      |
| Q9H4A6                                                                                          | 2             | 4.5345           | R.AAGGGAGSSEDDAQRS.R            | 2            | GOLP3_HUMAN          |
| <b><i>Golgi phosphoprotein 4 - Homo sapiens (Human)</i></b>                                     |               |                  |                                 |              |                      |
| O00461                                                                                          | 2             | 3.192            | R.QQEQQQQVAR.E                  | 4            | GOLP4_HUMAN          |

| <i>Accession No*</i>                                                     | <i>Charge</i> | <i>XC(Max)**</i> | <i>Peptide*</i>                    | <i>TC***</i> | <i>Reference No*</i> |
|--------------------------------------------------------------------------|---------------|------------------|------------------------------------|--------------|----------------------|
| O00461                                                                   | 2             | 4.5307           | R.LAVQQVVEEAQQLR.E                 | 2            | GOLP4_HUMAN          |
| O00461                                                                   | 2             | 3.3455           | K.FQSPYEEQLEQQR.L                  | 1            | GOLP4_HUMAN          |
| O00461                                                                   | 2             | 2.737            | R.LQGHLLR.Q                        | 1            | GOLP4_HUMAN          |
| <b><i>Golgi reassembly-stacking protein 2 - Homo sapiens (Human)</i></b> |               |                  |                                    |              |                      |
| Q9H8Y8                                                                   | 2             | 5.2196           | R.VGDSTPVSEKPVSAAVDANASESP.-       | 1            | GORS2_HUMAN          |
| Q9H8Y8                                                                   | 3             | 4.6608           | K.APTTVEDRVDSTPVSEKPVSAAVDANASESP. | 1            | GORS2_HUMAN          |
| Q9H8Y8                                                                   | 1             | 2.3509           | K.APTTVEDR.V                       | 1            | GORS2_HUMAN          |
| Q9H8Y8                                                                   | 2             | 2.7211           | K.ADAASSLTVDPPTAK.A                | 1            | GORS2_HUMAN          |
| <b><i>Golgi resident protein GCP60 - Homo sapiens (Human)</i></b>        |               |                  |                                    |              |                      |
| Q9H3P7                                                                   | 2             | 4.7262           | R.GPGASGEQPEPGEAAAGGAAEEAR.R       | 3            | GCP60_HUMAN          |
| <b><i>Golgin subfamily A member 1 - Homo sapiens (Human)</i></b>         |               |                  |                                    |              |                      |
| Q92805                                                                   | 2             | 3.2442           | R.AADQTTAEQGM#R.Q                  | 2            | GOGA1_HUMAN          |
| Q92805                                                                   | 3             | 5.0641           | K.RLEQNLSGEEHVQELLK.E              | 1            | GOGA1_HUMAN          |
| Q92805                                                                   | 2             | 3.1727           | R.AADQTTAEQGM#R.Q                  | 2            | GOGA1_HUMAN          |
| Q92805                                                                   | 3             | 5.7386           | K.EQELQALIQQLSIDLQK.V              | 2            | GOGA1_HUMAN          |
| Q92805                                                                   | 3             | 4.968            | R.RDEMDELEGFQQQELSK.I              | 2            | GOGA1_HUMAN          |
| Q92805                                                                   | 2             | 4.6254           | R.TQALEAQIVALER.M                  | 2            | GOGA1_HUMAN          |
| Q92805                                                                   | 2             | 3.5033           | K.NILTAQLQEM#K.N                   | 2            | GOGA1_HUMAN          |
| <b><i>Golgin subfamily A member 2 - Homo sapiens (Human)</i></b>         |               |                  |                                    |              |                      |
| Q08379                                                                   | 2             | 3.1778           | R.AAELWGEQAEAR.R                   | 2            | GOGA2_HUMAN          |
| Q08379                                                                   | 2             | 3.4109           | K.TFSSTESLR.Q                      | 2            | GOGA2_HUMAN          |
| Q08379                                                                   | 2             | 3.4658           | K.AGMQLNLEELQK.K                   | 2            | GOGA2_HUMAN          |
| Q08379                                                                   | 2             | 3.816            | R.LEAATQQNQQLR.A                   | 2            | GOGA2_HUMAN          |
| Q08379                                                                   | 2             | 2.7805           | R.LAQDKKEEMK.V                     | 1            | GOGA2_HUMAN          |
| Q08379                                                                   | 3             | 4.7247           | R.EAMVAFFNSAVASAEQQAR.L            | 2            | GOGA2_HUMAN          |
| Q08379                                                                   | 2             | 4.8691           | R.VQELETSLAELR.N                   | 3            | GOGA2_HUMAN          |
| Q08379                                                                   | 2             | 3.9754           | K.SQEAQSLQQQR.D                    | 2            | GOGA2_HUMAN          |
| Q08379                                                                   | 2             | 3.7973           | K.NTQSNEDLKQEK.S                   | 3            | GOGA2_HUMAN          |
| Q08379                                                                   | 2             | 4.3092           | K.LLELQELVLR.L                     | 3            | GOGA2_HUMAN          |
| Q08379                                                                   | 2             | 3.1941           | R.ALSAVSTQQK.K                     | 1            | GOGA2_HUMAN          |
| Q08379                                                                   | 2             | 4.0483           | R.DNPTAQQIMQLLR.E                  | 2            | GOGA2_HUMAN          |
| <b><i>Golgin subfamily A member 3 - Homo sapiens (Human)</i></b>         |               |                  |                                    |              |                      |
| Q08378                                                                   | 2             | 3.0195           | K.TLLQQNQQLK.L                     | 2            | GOGA3_HUMAN          |
| Q08378                                                                   | 3             | 4.4439           | K.SGQVEHLQQETAALKK.Q               | 1            | GOGA3_HUMAN          |

| <i>Accession No*</i> | <i>Charge</i> | <i>XC(Max)**</i> | <i>Peptide*</i>          | <i>TC***</i> | <i>Reference No*</i> |
|----------------------|---------------|------------------|--------------------------|--------------|----------------------|
| Q08378               | 2             | 3.0627           | R.RLQEALAAK.E            | 2            | GOGA3_HUMAN          |
| Q08378               | 2             | 3.2822           | K.IKEQFLQK.V             | 2            | GOGA3_HUMAN          |
| Q08378               | 3             | 4.724            | K.NASLASSNNDLQVAEEQYQR.L | 1            | GOGA3_HUMAN          |
| Q08378               | 2             | 3.0997           | K.LTGLGQSNAALR.E         | 2            | GOGA3_HUMAN          |
| Q08378               | 2             | 3.72             | R.MADSAASLEQQLEQVK.L     | 1            | GOGA3_HUMAN          |
| Q08378               | 2             | 2.9286           | K.QLTLTQEALQSR.E         | 1            | GOGA3_HUMAN          |

***Golgin subfamily A member 4 - Homo sapiens (Human)***

|        |   |        |                                   |   |             |
|--------|---|--------|-----------------------------------|---|-------------|
| Q13439 | 2 | 2.784  | K.MLAEEDKR.K                      | 1 | GOGA4_HUMAN |
| Q13439 | 4 | 7.1528 | K.KLNQQAEEELQEIHEIQLQEKEQEVAELK.Q | 2 | GOGA4_HUMAN |
| Q13439 | 3 | 3.8827 | K.ALKQINQLELLK.E                  | 1 | GOGA4_HUMAN |
| Q13439 | 2 | 3.3461 | K.ELENTALELSQK.E                  | 2 | GOGA4_HUMAN |
| Q13439 | 2 | 3.1534 | R.ISLQQELSR.V                     | 2 | GOGA4_HUMAN |
| Q13439 | 2 | 4.4939 | K.LEDGNKEQEQT.K                   | 2 | GOGA4_HUMAN |
| Q13439 | 2 | 3.1153 | K.TIEIESLNEVLK.N                  | 1 | GOGA4_HUMAN |
| Q13439 | 2 | 4.373  | K.VRDLQTQLEELQK.K                 | 2 | GOGA4_HUMAN |
| Q13439 | 2 | 3.2536 | R.DLQQEAETYR.T                    | 3 | GOGA4_HUMAN |
| Q13439 | 3 | 4.4096 | R.EFNTQLAQKEQELEM.TIK.E           | 1 | GOGA4_HUMAN |
| Q13439 | 2 | 3.7829 | K.ILTLENQVYSMK.A                  | 2 | GOGA4_HUMAN |
| Q13439 | 3 | 5.8474 | K.ISQEKEQQESLALLEEELQKK.A         | 2 | GOGA4_HUMAN |

***Golgin subfamily A member 5 - Homo sapiens (Human)***

|        |   |        |                        |   |             |
|--------|---|--------|------------------------|---|-------------|
| Q8TBA6 | 2 | 3.3316 | K.STYISSAADNIR.N       | 1 | GOGA5_HUMAN |
| Q8TBA6 | 3 | 3.9934 | R.NEVQSLNQEMASLLQR.S   | 2 | GOGA5_HUMAN |
| Q8TBA6 | 2 | 3.6518 | R.SELQDMEAQQVNEAESAR.E | 1 | GOGA5_HUMAN |
| Q8TBA6 | 3 | 4.7305 | R.TPVEASHPVENASVPR.P   | 2 | GOGA5_HUMAN |
| Q8TBA6 | 2 | 3.896  | R.QNLAEAITLAER.K       | 3 | GOGA5_HUMAN |
| Q8TBA6 | 2 | 3.2443 | R.VDQGAATALSR.K        | 2 | GOGA5_HUMAN |
| Q8TBA6 | 2 | 3.211  | R.LQEADQLLSTR.T        | 2 | GOGA5_HUMAN |
| Q8TBA6 | 3 | 4.2744 | R.LKQEFHYIEEDLYR.T     | 1 | GOGA5_HUMAN |
| Q8TBA6 | 2 | 3.2057 | R.KDNASNIYSK.N         | 4 | GOGA5_HUMAN |
| Q8TBA6 | 2 | 5.1649 | R.AQVDDLTEAVAAK.D      | 4 | GOGA5_HUMAN |
| Q8TBA6 | 2 | 3.9451 | R.SKETQEELNK.A         | 5 | GOGA5_HUMAN |

***Golgin subfamily B member 1 - Homo sapiens (Human)***

|        |   |        |                          |   |             |
|--------|---|--------|--------------------------|---|-------------|
| Q14789 | 2 | 3.2619 | K.SKEISQFLNR.L           | 1 | GOGB1_HUMAN |
| Q14789 | 3 | 4.2499 | K.IISLLSGKEEAIQVAIAELR.Q | 1 | GOGB1_HUMAN |
| Q14789 | 3 | 3.9233 | R.SLQSQLQNKESVLEGAER.V   | 1 | GOGB1_HUMAN |



| <i>Accession No*</i> | <i>Charge</i> | <i>XC(Max)**</i> | <i>Peptide*</i>                     | <i>TC***</i> | <i>Reference No*</i> |
|----------------------|---------------|------------------|-------------------------------------|--------------|----------------------|
| Q14789               | 2             | 4.0554           | K.KEEDVSYLSGQLSEK.E                 | 1            | GOGB1_HUMAN          |
| Q14789               | 3             | 7.2571           | R.TGEADREVSEISIVDIANKR.S            | 4            | GOGB1_HUMAN          |
| Q14789               | 2             | 3.8121           | R.TSEEISLNDAGVELK.S                 | 2            | GOGB1_HUMAN          |
| Q14789               | 2             | 4.1732           | R.SAAQPSTSPAEVQSLKK.A               | 1            | GOGB1_HUMAN          |
| Q14789               | 2             | 3.2337           | R.SLQSQLQNK.E                       | 2            | GOGB1_HUMAN          |
| Q14789               | 2             | 3.1237           | K.AFQIMQEELR.Q                      | 2            | GOGB1_HUMAN          |
| Q14789               | 2             | 5.1101           | K.SLADVESQVSAQNK.E                  | 3            | GOGB1_HUMAN          |
| Q14789               | 3             | 4.0034           | K.ETEKQLQEAQEEMEMKEK.M              | 1            | GOGB1_HUMAN          |
| Q14789               | 2             | 2.7907           | K.ILELEEENDRLR.A                    | 1            | GOGB1_HUMAN          |
| Q14789               | 3             | 6.0974           | K.NKEFSQTLENEKNTLLSQISTK.D          | 2            | GOGB1_HUMAN          |
| Q14789               | 2             | 3.6413           | R.VAAENALSVAEEQIR.R                 | 2            | GOGB1_HUMAN          |
| Q14789               | 4             | 6.3764           | R.RLDYESQTAHDNLLTEQIHLSIEAK.S       | 2            | GOGB1_HUMAN          |
| Q14789               | 2             | 4.8063           | R.NQILSQQLQMEAEHNTLR.N              | 2            | GOGB1_HUMAN          |
| Q14789               | 3             | 4.2019           | K.DFSSHDEINNYLQQIDQLK.E             | 2            | GOGB1_HUMAN          |
| Q14789               | 2             | 3.9068           | R.SSSAEESGQDVLENTFSQK.H             | 3            | GOGB1_HUMAN          |
| Q14789               | 2             | 2.7253           | K.QLEM#NLAEAER.Q                    | 1            | GOGB1_HUMAN          |
| Q14789               | 2             | 3.6999           | K.GLTAIQISFGR.S                     | 2            | GOGB1_HUMAN          |
| Q14789               | 2             | 3.9382           | K.FSYEQLETDLQASR.E                  | 2            | GOGB1_HUMAN          |
| Q14789               | 2             | 3.3277           | K.EYEILLQSYENVSNEAER.I              | 1            | GOGB1_HUMAN          |
| Q14789               | 4             | 5.5491           | K.DFSSHDEINNYLQQIDQLKER.I           | 3            | GOGB1_HUMAN          |
| Q14789               | 3             | 3.7275           | K.DDYNRLQEQFDEQSKENENIGDQLR.Q       | 1            | GOGB1_HUMAN          |
| Q14789               | 2             | 3.6612           | K.AQGGTVLPTEPQSEEQLSK.H             | 2            | GOGB1_HUMAN          |
| Q14789               | 3             | 5.143            | K.AKEISNLNQLIEEFKK.N                | 2            | GOGB1_HUMAN          |
| Q14789               | 3             | 4.1249           | R.KFSDAIQSKEEIR.L                   | 1            | GOGB1_HUMAN          |
| Q14789               | 2             | 4.1418           | R.NTVETEREESK.I                     | 5            | GOGB1_HUMAN          |
| Q14789               | 3             | 6.9365           | R.LPLQQHETASQTSFPDVYNEGTVAVTEENIASL | 2            | GOGB1_HUMAN          |
| Q14789               | 3             | 5.2891           | R.APLDPELHQESDMEFNNTTQEDVQER.L      | 2            | GOGB1_HUMAN          |
| Q14789               | 2             | 3.1349           | R.NETETAER.V                        | 1            | GOGB1_HUMAN          |
| Q14789               | 3             | 5.0299           | K.LLQDKNEQAVQSAQTIQQLQEDQLQK.S      | 1            | GOGB1_HUMAN          |
| Q14789               | 3             | 4.6234           | K.LKETAEEEKDDLEER.L                 | 5            | GOGB1_HUMAN          |
| Q14789               | 2             | 4.2901           | K.RAEEADHEVLDQK.E                   | 1            | GOGB1_HUMAN          |
| Q14789               | 3             | 5.1331           | K.LISKKEEDVSYLSGQLSEK.E             | 1            | GOGB1_HUMAN          |
| Q14789               | 3             | 3.9513           | R.KLEEHEESLVGR.A                    | 1            | GOGB1_HUMAN          |
| Q14789               | 2             | 3.7283           | R.IQQLNSNFSQLLEEK.N                 | 1            | GOGB1_HUMAN          |
| Q14789               | 2             | 5.1356           | K.MNLLNQQIQEELSR.V                  | 6            | GOGB1_HUMAN          |
| Q14789               | 2             | 2.9131           | K.RVVELENEK.G                       | 2            | GOGB1_HUMAN          |
| Q14789               | 2             | 3.8817           | K.LALEGLTEDKEK.L                    | 2            | GOGB1_HUMAN          |

| <i>Accession No*</i> | <i>Charge</i> | <i>XC(Max)**</i> | <i>Peptide*</i>           | <i>TC***</i> | <i>Reference No*</i> |
|----------------------|---------------|------------------|---------------------------|--------------|----------------------|
| Q14789               | 2             | 3.6409           | K.LAAEEQFQALVK.Q          | 2            | GGOB1_HUMAN          |
| Q14789               | 2             | 3.088            | K.KLQEALTSR.K             | 5            | GGOB1_HUMAN          |
| Q14789               | 3             | 5.6816           | R.AQVVDLLQQLTAAEQR.N      | 2            | GGOB1_HUMAN          |
| Q14789               | 2             | 3.5186           | R.KLQAALISR.K             | 2            | GGOB1_HUMAN          |
| Q14789               | 2             | 3.778            | K.M#NLLNQIQEELSR.V        | 3            | GGOB1_HUMAN          |
| Q14789               | 3             | 5.3004           | K.KEEDVSYLSGQLSEKAAALTK.I | 1            | GGOB1_HUMAN          |
| Q14789               | 2             | 4.0841           | K.LSSQITLLEAQR.N          | 2            | GGOB1_HUMAN          |
| Q14789               | 2             | 3.3538           | R.AEVHPAGDTAK.E           | 1            | GGOB1_HUMAN          |
| Q14789               | 3             | 4.5167           | R.AEEAKKEQVEEDNEVSSGLK.Q  | 1            | GGOB1_HUMAN          |
| Q14789               | 2             | 3.3497           | K.VEELSQALSQK.E           | 1            | GGOB1_HUMAN          |
| Q14789               | 2             | 4.0276           | K.SLQEELSLAR.G            | 4            | GGOB1_HUMAN          |
| Q14789               | 2             | 3.1946           | R.IAGLEEEKQK.N            | 1            | GGOB1_HUMAN          |
| Q14789               | 2             | 4.153            | K.SLKDQLTDLNSLEK.C        | 1            | GGOB1_HUMAN          |
| Q14789               | 3             | 3.8379           | R.DHANEELDELKR.K          | 1            | GGOB1_HUMAN          |
| Q14789               | 2             | 2.722            | R.LALLQEER.D              | 1            | GGOB1_HUMAN          |
| Q14789               | 2             | 5.1152           | K.IQTEIIEQEDLIK.A         | 4            | GGOB1_HUMAN          |
| Q14789               | 3             | 3.9526           | K.TVSHEAEVHAESLQK.L       | 2            | GGOB1_HUMAN          |

***Golgi-specific brefeldin A-resistance guanine nucleotide exchange factor 1 - Homo sapiens (Huma***

|        |   |        |                       |   |            |
|--------|---|--------|-----------------------|---|------------|
| Q92538 | 2 | 5.1279 | R.AASSSSPGSPVASSPSR.L | 4 | GBF1_HUMAN |
|--------|---|--------|-----------------------|---|------------|

***GRAM domain-containing protein 1B - Homo sapiens (Human)***

|        |   |        |                    |   |             |
|--------|---|--------|--------------------|---|-------------|
| Q3KR37 | 2 | 3.9376 | R.SPTPQNQDGMTVEK.G | 2 | GRM1B_HUMAN |
|--------|---|--------|--------------------|---|-------------|

***GRAM domain-containing protein 1C - Homo sapiens (Human)***

|        |   |        |                  |   |             |
|--------|---|--------|------------------|---|-------------|
| Q8IYS0 | 2 | 2.8091 | R.SSLDDSGERDEK.L | 1 | GRM1C_HUMAN |
|--------|---|--------|------------------|---|-------------|

***GRAM domain-containing protein 3 - Homo sapiens (Human)***

|        |   |        |                         |   |             |
|--------|---|--------|-------------------------|---|-------------|
| Q96HH9 | 3 | 4.4369 | R.SPTAQSPTPSVEADSPDQK.K | 3 | GRAM3_HUMAN |
|--------|---|--------|-------------------------|---|-------------|

***GRB2-associated-binding protein 1 - Homo sapiens (Human)***

|        |   |        |                     |   |            |
|--------|---|--------|---------------------|---|------------|
| Q13480 | 2 | 2.9131 | R.SNTISTVDLNK.L     | 1 | GAB1_HUMAN |
| Q13480 | 2 | 4.8907 | R.APSASVDSSLYNLPR.S | 4 | GAB1_HUMAN |

***G-rich sequence factor 1 - Homo sapiens (Human)***

|        |   |        |                                  |   |             |
|--------|---|--------|----------------------------------|---|-------------|
| Q12849 | 2 | 2.7719 | R.ITM#EYSSSGK.A                  | 1 | GRSF1_HUMAN |
| Q12849 | 3 | 4.2922 | K.YITEPEMVFEEHEVNEDIQPMTAFESEK.E | 1 | GRSF1_HUMAN |

***GRIP1-associated protein 1 - Homo sapiens (Human)***

|        |   |        |                  |   |             |
|--------|---|--------|------------------|---|-------------|
| Q4V328 | 2 | 3.4631 | R.LQNSTLMAEFSK.L | 2 | GRAP1_HUMAN |
|--------|---|--------|------------------|---|-------------|

Accession No\* Charge XC(Max)\*\* Peptide\* TC\*\*\* Reference No\*

***Growth arrest and DNA-damage-inducible proteins-interacting protein 1 - Homo sapiens (Human)***

|        |   |        |                         |   |             |
|--------|---|--------|-------------------------|---|-------------|
| Q8TAE8 | 2 | 4.3397 | K.MPQMIVNWQQQR.E        | 2 | G45IP_HUMAN |
| Q8TAE8 | 2 | 3.524  | R.AAALAAVAQDPAASGAPSS.- | 1 | G45IP_HUMAN |

***Growth factor receptor-bound protein 2 - Homo sapiens (Human)***

|        |   |        |             |   |            |
|--------|---|--------|-------------|---|------------|
| P62993 | 2 | 2.8004 | R.NQQIFLR.D | 1 | GRB2_HUMAN |
|--------|---|--------|-------------|---|------------|

***GrpE protein homolog 1, mitochondrial precursor - Homo sapiens (Human)***

|        |   |        |                      |   |             |
|--------|---|--------|----------------------|---|-------------|
| Q9HAV7 | 2 | 3.453  | K.NSGQNLEEDMGQSEQK.A | 1 | GRPE1_HUMAN |
| Q9HAV7 | 2 | 4.5828 | K.DLLEVADVLEK.A      | 3 | GRPE1_HUMAN |

***GTPase-activating protein ZNF289 - Homo sapiens (Human)***

|        |   |        |                             |   |             |
|--------|---|--------|-----------------------------|---|-------------|
| Q8N6H7 | 2 | 2.7771 | K.QAEESM#VASM#R.L           | 1 | ZN289_HUMAN |
| Q8N6H7 | 3 | 4.31   | R.SQLDLFDDVGTAFSGPPK.Y      | 1 | ZN289_HUMAN |
| Q8N6H7 | 2 | 3.4858 | K.VSSQSFSEIER.Q             | 3 | ZN289_HUMAN |
| Q8N6H7 | 3 | 5.1564 | R.SSVSHSVLSEMQVIEQETPVSAK.S | 1 | ZN289_HUMAN |
| Q8N6H7 | 3 | 4.4052 | R.SSVSHSVLSEMQVIEQETPVSAK.S | 1 | ZN289_HUMAN |
| Q8N6H7 | 2 | 3.3936 | R.SSGLESSEAR.Q              | 5 | ZN289_HUMAN |
| Q8N6H7 | 2 | 3.3072 | K.QAEESMVASMR.L             | 1 | ZN289_HUMAN |
| Q8N6H7 | 3 | 4.9125 | K.LREQQAADAKK.Q             | 3 | ZN289_HUMAN |
| Q8N6H7 | 2 | 3.7755 | K.LREQQAADAK.K              | 5 | ZN289_HUMAN |
| Q8N6H7 | 2 | 3.0603 | R.LGMGLVSR.S                | 1 | ZN289_HUMAN |
| Q8N6H7 | 2 | 3.6265 | K.AISSDMFFGR.E              | 2 | ZN289_HUMAN |
| Q8N6H7 | 2 | 3.0954 | K.DNPFSLGESFGSR.W           | 1 | ZN289_HUMAN |
| Q8N6H7 | 2 | 2.7669 | K.KLQNLEGGK.K               | 2 | ZN289_HUMAN |
| Q8N6H7 | 2 | 4.1204 | R.LAYQELQIDR.K              | 6 | ZN289_HUMAN |
| Q8N6H7 | 3 | 5.2533 | K.YKDNPFLGESFGSR.W          | 5 | ZN289_HUMAN |

***GTPase-activating Rap/Ran-GAP domain-like 1 - Homo sapiens (Human)***

|        |   |        |                  |   |             |
|--------|---|--------|------------------|---|-------------|
| Q6GYQ0 | 2 | 3.3773 | K.TVDIDDAQILPR.S | 1 | GRIPE_HUMAN |
|--------|---|--------|------------------|---|-------------|

***Guanine nucleotide-binding protein G(I)/G(S)/G(O) gamma-12 subunit precursor - Homo sapiens***

|        |   |        |                 |   |             |
|--------|---|--------|-----------------|---|-------------|
| Q9UBI6 | 2 | 3.0894 | K.TASTNNIAQAR.R | 1 | GBG12_HUMAN |
|--------|---|--------|-----------------|---|-------------|

***H/ACA ribonucleoprotein complex subunit 4 - Homo sapiens (Human)***

|        |   |        |                        |   |            |
|--------|---|--------|------------------------|---|------------|
| O60832 | 2 | 4.4392 | K.AGLESGAEPGDGSDSTTK.K | 8 | DKC1_HUMAN |
| O60832 | 2 | 3.1141 | K.APQVVAEAAK.T         | 2 | DKC1_HUMAN |

***Harmonin isoform b3 - Homo sapiens (Human)***

|        |   |        |                     |   |              |
|--------|---|--------|---------------------|---|--------------|
| Q7RTU8 | 2 | 5.8228 | K.IVTDYTLAEAEALQK.A | 7 | Q7RTU8_HUMAN |
|--------|---|--------|---------------------|---|--------------|

*Accession No\* Charge XC(Max)\*\* Peptide\* TC\*\*\* Reference No\**

***HBS1-like protein - Homo sapiens (Human)***

|        |   |        |                             |   |             |
|--------|---|--------|-----------------------------|---|-------------|
| Q9Y450 | 3 | 4.9404 | K.SANPPHTIQASEEQSSTPAPVK.K  | 2 | HBS1L_HUMAN |
| Q9Y450 | 2 | 6.7673 | K.GPPIEDAIASSDVLETASK.S     | 4 | HBS1L_HUMAN |
| Q9Y450 | 3 | 4.0739 | K.SANPPHTIQASEEQSSTPAPVKK.S | 1 | HBS1L_HUMAN |

***HCLS1-binding protein 3. - Homo sapiens (Human)***

|        |   |        |                        |   |              |
|--------|---|--------|------------------------|---|--------------|
| Q53T59 | 2 | 4.0547 | R.LTIFDEEVDPEGLFGPGR.K | 2 | Q53T59_HUMAN |
|--------|---|--------|------------------------|---|--------------|

***Hcp beta-lactamase-like protein C1orf163 - Homo sapiens (Human)***

|        |   |        |                                |   |             |
|--------|---|--------|--------------------------------|---|-------------|
| Q96BR5 | 2 | 3.3567 | R.ACDGGYTSSCFNLSAMFLQGAPGFPK.D | 1 | CA163_HUMAN |
| Q96BR5 | 1 | 2.2508 | K.LGAYVVTGK.G                  | 2 | CA163_HUMAN |
| Q96BR5 | 2 | 3.4876 | K.LGDGVDKDEAK.A                | 3 | CA163_HUMAN |
| Q96BR5 | 2 | 4.4699 | K.LGDGVDKDEAKAEVLK.N           | 4 | CA163_HUMAN |
| Q96BR5 | 2 | 3.1773 | R.LVDYLEGIRK.N                 | 2 | CA163_HUMAN |

***HD domain containing 2 - Homo sapiens (Human)***

|        |   |        |                       |   |              |
|--------|---|--------|-----------------------|---|--------------|
| Q6NZ49 | 2 | 3.454  | R.STNIAAAASEPHS.-     | 2 | Q6NZ49_HUMAN |
| Q6NZ49 | 3 | 3.7129 | K.FNHPEIVQLVSELEAER.S | 1 | Q6NZ49_HUMAN |

***Heat shock 70 kDa protein 4 - Homo sapiens (Human)***

|        |   |        |                        |   |             |
|--------|---|--------|------------------------|---|-------------|
| P34932 | 1 | 2.4049 | K.LFEELGK.Q            | 1 | HSP74_HUMAN |
| P34932 | 3 | 4.9959 | K.TSTVDLPIENQLLWQIDR.E | 2 | HSP74_HUMAN |
| P34932 | 3 | 3.7481 | K.NKEDQYDHLDAADM#TK.V  | 3 | HSP74_HUMAN |
| P34932 | 2 | 4.1912 | K.AESEEM#ETSQAGSK.D    | 2 | HSP74_HUMAN |
| P34932 | 2 | 4.4162 | K.AESEEMETSQAGSK.D     | 3 | HSP74_HUMAN |
| P34932 | 3 | 4.4272 | K.IRFQESEERPK.L        | 2 | HSP74_HUMAN |
| P34932 | 2 | 3.1369 | K.KMDQPPQAK.K          | 2 | HSP74_HUMAN |
| P34932 | 2 | 2.7011 | K.QSLTMDPVVK.S         | 1 | HSP74_HUMAN |
| P34932 | 3 | 3.8014 | K.LEDTENWLYEDGEDQPK.Q  | 1 | HSP74_HUMAN |
| P34932 | 2 | 2.8808 | K.MDQPPQAK.K           | 1 | HSP74_HUMAN |
| P34932 | 2 | 3.2507 | R.EMLNLYIENEGK.M       | 2 | HSP74_HUMAN |
| P34932 | 1 | 2.6727 | K.NLGQPIK.I            | 7 | HSP74_HUMAN |
| P34932 | 3 | 5.0324 | K.NKEDQYDHLDAADMTK.V   | 6 | HSP74_HUMAN |
| P34932 | 2 | 2.9153 | K.QVYVDKLAELK.N        | 1 | HSP74_HUMAN |
| P34932 | 2 | 2.8291 | K.STNEAM#EWMNNK.L      | 2 | HSP74_HUMAN |
| P34932 | 2 | 3.4307 | K.STNEAMEWMNNK.L       | 4 | HSP74_HUMAN |
| P34932 | 2 | 2.9443 | K.M#DQPPQAK.K          | 2 | HSP74_HUMAN |
| P34932 | 2 | 2.7429 | R.FQESEERPK.L          | 1 | HSP74_HUMAN |

Accession No\* Charge XC(Max)\*\* Peptide\* TC\*\*\* Reference No\*

**Heat shock 70 kDa protein 4L - Homo sapiens (Human)**

|        |   |        |                         |   |             |
|--------|---|--------|-------------------------|---|-------------|
| O95757 | 3 | 4.3808 | K.ANSEHNGPM#DGQSGTETK.S | 1 | HS74L_HUMAN |
| O95757 | 3 | 4.2918 | K.ANSEHNGPMDGQSGTETK.S  | 2 | HS74L_HUMAN |

**Heat shock cognate 71 kDa protein - Homo sapiens (Human)**

|        |   |        |                  |   |             |
|--------|---|--------|------------------|---|-------------|
| P11142 | 2 | 4.4415 | K.NSLESYAFNMK.A  | 6 | HSP7C_HUMAN |
| P11142 | 2 | 4.0619 | K.NSLESYAFNM#K.A | 5 | HSP7C_HUMAN |

**Heat shock factor protein 1 - Homo sapiens (Human)**

|        |   |        |                      |   |            |
|--------|---|--------|----------------------|---|------------|
| Q00613 | 2 | 2.7117 | R.KVTSVSTLKSEDIK.I   | 1 | HSF1_HUMAN |
| Q00613 | 2 | 3.2932 | R.ESEPAPASVTALTDAR.G | 3 | HSF1_HUMAN |

**Heat shock factor-binding protein 1 - Homo sapiens (Human)**

|        |   |        |                         |   |             |
|--------|---|--------|-------------------------|---|-------------|
| O75506 | 3 | 5.8318 | K.TVQDLTSVVQTLQQM#QDK.F | 4 | HSBP1_HUMAN |
| O75506 | 3 | 5.9603 | K.TVQDLTSVVQTLQMQDK.F   | 5 | HSBP1_HUMAN |

**Heat shock protein beta-1 - Homo sapiens (Human)**

|        |   |        |                                    |    |             |
|--------|---|--------|------------------------------------|----|-------------|
| P04792 | 2 | 4.536  | K.HEERQDEHGYISR.C                  | 4  | HSPB1_HUMAN |
| P04792 | 3 | 4.0747 | R.GPSWDPFRDWYPHSR.L                | 1  | HSPB1_HUMAN |
| P04792 | 2 | 5.3754 | R.AQLGGPEAAKSDETAAK.-              | 6  | HSPB1_HUMAN |
| P04792 | 2 | 2.8945 | R.AQLGGPEAAK.S                     | 10 | HSPB1_HUMAN |
| P04792 | 3 | 5.1773 | K.TKDGVEITGKHEER.Q                 | 2  | HSPB1_HUMAN |
| P04792 | 3 | 6.6166 | R.KYTLPPGVDPTQVSSSLSPGTLTVEAPMPK.L | 2  | HSPB1_HUMAN |
| P04792 | 2 | 4.2333 | K.LATQSNEITIPVTFESR.A              | 42 | HSPB1_HUMAN |
| P04792 | 2 | 2.9637 | R.QLSSGVSEIR.H                     | 2  | HSPB1_HUMAN |
| P04792 | 3 | 5.5966 | R.PLPPAAIESPAVAAPAYSRA             | 24 | HSPB1_HUMAN |
| P04792 | 2 | 4.3678 | R.LFDQAFGLPR.L                     | 3  | HSPB1_HUMAN |
| P04792 | 2 | 5.3657 | R.VSLDVNHFAPDELTVK.T               | 10 | HSPB1_HUMAN |
| P04792 | 3 | 6.8265 | R.KYTLPPGVDPTQVSSSLSPGTLTVEAPM#PK. | 7  | HSPB1_HUMAN |
| P04792 | 2 | 3.6381 | K.DGVVEITGK.H                      | 9  | HSPB1_HUMAN |
| P04792 | 3 | 4.1445 | K.TKDGVEITGK.H                     | 12 | HSPB1_HUMAN |
| P04792 | 2 | 4.286  | K.DGVVEITGKHEER.Q                  | 4  | HSPB1_HUMAN |

**Heat shock protein beta-6 - Homo sapiens (Human)**

|        |   |        |                               |   |             |
|--------|---|--------|-------------------------------|---|-------------|
| O14558 | 3 | 4.3832 | R.APSVALPVAQVPTDPGHFSVLLDVK.H | 4 | HSPB6_HUMAN |
| O14558 | 2 | 3.1663 | K.HFSPEEIAVK.V                | 5 | HSPB6_HUMAN |
| O14558 | 2 | 2.7641 | R.ASAPLPGLSAPGR.L             | 1 | HSPB6_HUMAN |

**Heat shock protein beta-8 - Homo sapiens (Human)**

| <i>Accession No*</i>                                                                         | <i>Charge</i> | <i>XC(Max)**</i> | <i>Peptide*</i>               | <i>TC***</i> | <i>Reference No*</i> |
|----------------------------------------------------------------------------------------------|---------------|------------------|-------------------------------|--------------|----------------------|
| Q9UJY1                                                                                       | 2             | 2.8591           | K.DGYVEVSGK.H                 | 1            | HSPB8_HUMAN          |
| Q9UJY1                                                                                       | 3             | 4.111            | K.HEEKQQEGGIVSK.N             | 1            | HSPB8_HUMAN          |
| <b><i>Heat shock protein HSP 90-beta - Homo sapiens (Human)</i></b>                          |               |                  |                               |              |                      |
| P08238                                                                                       | 2             | 4.9469           | K.HLEINPDHPIVETLR.Q           | 5            | HS90B_HUMAN          |
| <b><i>Heat shock-related 70 kDa protein 2 - Homo sapiens (Human)</i></b>                     |               |                  |                               |              |                      |
| P54652                                                                                       | 2             | 3.7764           | K.NALESYTYNIK.Q               | 2            | HSP72_HUMAN          |
| <b><i>Hematological and neurological expressed 1 protein - Homo sapiens (Human)</i></b>      |               |                  |                               |              |                      |
| Q9UK76                                                                                       | 2             | 3.5257           | K.MASNIFGTPEENQASWAK.S        | 1            | HN1_HUMAN            |
| Q9UK76                                                                                       | 3             | 6.755            | R.VLRPPGGGNSFSLGFDEPTEQPVRK.N | 2            | HN1_HUMAN            |
| Q9UK76                                                                                       | 3             | 4.175            | R.VLRPPGGGNSFSLGFDEPTEQPVR.K  | 1            | HN1_HUMAN            |
| Q9UK76                                                                                       | 2             | 4.5922           | K.SSGGREDLESSGLQR.R           | 2            | HN1_HUMAN            |
| <b><i>Hematological and neurological expressed 1-like protein - Homo sapiens (Human)</i></b> |               |                  |                               |              |                      |
| Q9H910                                                                                       | 2             | 4.6008           | K.TSDIFGSPVTATSR.L            | 5            | HN1L_HUMAN           |
| Q9H910                                                                                       | 2             | 3.0339           | K.EQEPMPVDSHEPR.L             | 1            | HN1L_HUMAN           |
| Q9H910                                                                                       | 2             | 4.5137           | K.GSGIFDESTPVQTR.Q            | 4            | HN1L_HUMAN           |
| Q9H910                                                                                       | 2             | 4.4947           | R.M#ASNIFGPTEEPQNIPK.R        | 7            | HN1L_HUMAN           |
| Q9H910                                                                                       | 2             | 2.9941           | R.MASNIFGPTEEPQNIPK.R         | 1            | HN1L_HUMAN           |
| <b><i>Hematopoietic lineage cell-specific protein - Homo sapiens (Human)</i></b>             |               |                  |                               |              |                      |
| P14317                                                                                       | 3             | 4.9152           | K.SAVGHEYVAEVEK.H             | 5            | HCLS1_HUMAN          |
| P14317                                                                                       | 3             | 4.3157           | R.SPEAPQPVIAMEEPAVPAPLPK.K    | 1            | HCLS1_HUMAN          |
| P14317                                                                                       | 2             | 2.7209           | R.EHPVPLLPIR.Q                | 1            | HCLS1_HUMAN          |
| P14317                                                                                       | 2             | 3.2578           | K.VSEEHDVLR.K                 | 3            | HCLS1_HUMAN          |
| P14317                                                                                       | 2             | 2.7513           | K.SAVGFNEMEAPTTAYKK.T         | 1            | HCLS1_HUMAN          |
| P14317                                                                                       | 2             | 3.4252           | K.SAVGFNEMEAPTTAYK.K          | 2            | HCLS1_HUMAN          |
| P14317                                                                                       | 3             | 5.2432           | K.RSPEAPQPVIAMEEPAVPAPLPK.K   | 2            | HCLS1_HUMAN          |
| P14317                                                                                       | 2             | 3.9608           | R.QLPEDNEEPALPPR.T            | 8            | HCLS1_HUMAN          |
| P14317                                                                                       | 2             | 4.2287           | R.SPEAPQPVIAM#EPAVPAPLPK.K    | 1            | HCLS1_HUMAN          |
| P14317                                                                                       | 2             | 2.7337           | K.SAVGFNEM#EAPTTAYKK.T        | 1            | HCLS1_HUMAN          |
| P14317                                                                                       | 2             | 3.8023           | K.GFGGQYGIQK.D                | 6            | HCLS1_HUMAN          |
| P14317                                                                                       | 3             | 4.7847           | R.MDKSAVGHEYVAEVEK.H          | 1            | HCLS1_HUMAN          |
| P14317                                                                                       | 2             | 2.8216           | K.SAVGFNEM#EAPTTAYK.K         | 1            | HCLS1_HUMAN          |
| P14317                                                                                       | 2             | 3.0177           | R.EEEEEKAQQVAR.R              | 1            | HCLS1_HUMAN          |
| P14317                                                                                       | 2             | 3.7708           | K.SAVGFDYKGEVEK.H             | 1            | HCLS1_HUMAN          |
| <b><i>Heme oxygenase 2 - Homo sapiens (Human)</i></b>                                        |               |                  |                               |              |                      |

| <i>Accession No*</i>                                                                              | <i>Charge</i> | <i>XC(Max)**</i> | <i>Peptide*</i>                | <i>TC***</i> | <i>Reference No*</i> |
|---------------------------------------------------------------------------------------------------|---------------|------------------|--------------------------------|--------------|----------------------|
| P30519                                                                                            | 2             | 3.1072           | R.MNALDLNMK.T                  | 1            | HMOX2_HUMAN          |
| P30519                                                                                            | 2             | 2.8619           | K.AFEYNMQIFNELDQAGSTLAR.E      | 1            | HMOX2_HUMAN          |
| P30519                                                                                            | 3             | 4.8974           | R.IHYIQNEPELLVAHAYTR.Y         | 1            | HMOX2_HUMAN          |
| P30519                                                                                            | 3             | 5.8604           | R.ALKLPSTGEGTQFYLFENVDNAQQFK.Q | 1            | HMOX2_HUMAN          |
| <b><i>Heme-binding protein 1 - Homo sapiens (Human)</i></b>                                       |               |                  |                                |              |                      |
| Q9NRV9                                                                                            | 2             | 2.875            | K.GDKKEEVAYEER.A               | 1            | HEBP1_HUMAN          |
| Q9NRV9                                                                                            | 2             | 2.7296           | R.AALEGTATYR.G                 | 1            | HEBP1_HUMAN          |
| Q9NRV9                                                                                            | 2             | 3.4681           | K.EADYVAQATR.L                 | 2            | HEBP1_HUMAN          |
| Q9NRV9                                                                                            | 2             | 4.4398           | K.FATVEVTDKPVDEALR.E           | 3            | HEBP1_HUMAN          |
| Q9NRV9                                                                                            | 3             | 4.0911           | K.FATVEVTDKPVDEALREAMPK.V      | 2            | HEBP1_HUMAN          |
| Q9NRV9                                                                                            | 2             | 3.3649           | R.IPNQFQSDPPAPSDK.S            | 1            | HEBP1_HUMAN          |
| <b><i>Hemoglobin subunit beta - Homo sapiens (Human)</i></b>                                      |               |                  |                                |              |                      |
| P68871                                                                                            | 2             | 2.7768           | K.EFTPPVQAAYQK.V               | 1            | HBB_HUMAN            |
| <b><i>Hemoglobin subunit delta - Homo sapiens (Human)</i></b>                                     |               |                  |                                |              |                      |
| P02042                                                                                            | 2             | 2.8184           | K.EFTPQMQAAYQK.V               | 1            | HBD_HUMAN            |
| <b><i>Hemopexin precursor - Homo sapiens (Human)</i></b>                                          |               |                  |                                |              |                      |
| P02790                                                                                            | 2             | 2.7158           | K.GGYTLVSGYPK.R                | 1            | HEMO_HUMAN           |
| P02790                                                                                            | 3             | 4.559            | K.SGAQATWTELPWPHEK.V           | 1            | HEMO_HUMAN           |
| <b><i>Hepatitis B virus X-interacting protein - Homo sapiens (Human)</i></b>                      |               |                  |                                |              |                      |
| O43504                                                                                            | 3             | 7.4152           | R.GTSLDEHAGVISVLAQQAAL.L       | 14           | XIP_HUMAN            |
| O43504                                                                                            | 3             | 4.4717           | K.HDGITVAVHK.M                 | 6            | XIP_HUMAN            |
| <b><i>Hepatocyte growth factor-like protein precursor - Homo sapiens (Human)</i></b>              |               |                  |                                |              |                      |
| P26927                                                                                            | 2             | 3.2362           | R.SPLNDFQVLR.G                 | 1            | HGFL_HUMAN           |
| <b><i>Hepatocyte growth factor-regulated tyrosine kinase substrate - Homo sapiens (Human)</i></b> |               |                  |                                |              |                      |
| O14964                                                                                            | 2             | 3.0612           | R.RLYYEGLQDK.L                 | 1            | HGS_HUMAN            |
| <b><i>Hepatocyte nuclear factor 1-alpha - Homo sapiens (Human)</i></b>                            |               |                  |                                |              |                      |
| P20823                                                                                            | 2             | 4.0147           | K.AVVETLLQEDPWR.V              | 3            | HNF1A_HUMAN          |
| P20823                                                                                            | 3             | 4.5153           | K.LSQLQTELLAALLESGLSK.E        | 2            | HNF1A_HUMAN          |
| <b><i>Hepatocyte nuclear factor 1-beta - Homo sapiens (Human)</i></b>                             |               |                  |                                |              |                      |
| P35680                                                                                            | 2             | 4.3253           | K.LTSLQEQELLSALLSSGVTK.E       | 3            | HNF1B_HUMAN          |
| P35680                                                                                            | 2             | 4.4445           | K.ELQALNTEEAQR.A               | 1            | HNF1B_HUMAN          |
| <b><i>Hepatocyte nuclear factor 4-alpha - Homo sapiens (Human)</i></b>                            |               |                  |                                |              |                      |

| <i>Accession No*</i>                                                                  | <i>Charge</i> | <i>XC(Max)**</i> | <i>Peptide*</i>               | <i>TC***</i> | <i>Reference No*</i> |
|---------------------------------------------------------------------------------------|---------------|------------------|-------------------------------|--------------|----------------------|
| P41235                                                                                | 3             | 3.7192           | K.LLPGAVATIVKPLSAIPQPTITK.Q   | 1            | HNH4A_HUMAN          |
| <b><i>Hepatoma-derived growth factor - Homo sapiens (Human)</i></b>                   |               |                  |                               |              |                      |
| P51858                                                                                | 2             | 3.461            | R.IDEM#PEAAVK.S               | 5            | HDGF_HUMAN           |
| P51858                                                                                | 1             | 3.1831           | R.IDEMPEAAVK.S                | 8            | HDGF_HUMAN           |
| <b><i>Hepatoma-derived growth factor-related protein 3 - Homo sapiens (Human)</i></b> |               |                  |                               |              |                      |
| Q9Y3E1                                                                                | 3             | 4.3953           | K.EEENKSSSEGGDAGNDTR.N        | 1            | HDGR3_HUMAN          |
| Q9Y3E1                                                                                | 3             | 4.9584           | K.GFNEGLWEIENNPVK.F           | 4            | HDGR3_HUMAN          |
| Q9Y3E1                                                                                | 1             | 2.7191           | R.NTTSDLQK.T                  | 3            | HDGR3_HUMAN          |
| Q9Y3E1                                                                                | 2             | 3.5435           | K.AGDLVFAK.M                  | 4            | HDGR3_HUMAN          |
| <b><i>Hepatopoietin protein - Homo sapiens (Human)</i></b>                            |               |                  |                               |              |                      |
| Q9H290                                                                                | 3             | 4.4994           | R.RDAAASASTPAQAPTSDSPAEDASR.R | 1            | Q9H290_HUMAN         |
| Q9H290                                                                                | 3             | 6.4012           | R.DAAASASTPAQAPTSDSPAEDASR.R  | 4            | Q9H290_HUMAN         |
| <b><i>Heterogeneous nuclear ribonucleoprotein A/B - Homo sapiens (Human)</i></b>      |               |                  |                               |              |                      |
| Q99729                                                                                | 3             | 3.711            | R.SRGGFIFLK.D                 | 1            | ROAA_HUMAN           |
| Q99729                                                                                | 2             | 4.1422           | R.GFVFITFKEEEPVKK.V           | 1            | ROAA_HUMAN           |
| Q99729                                                                                | 2             | 4.0207           | K.EVYQQQQYGSGR.G              | 2            | ROAA_HUMAN           |
| Q99729                                                                                | 2             | 3.1594           | R.GFGFILFK.D                  | 4            | ROAA_HUMAN           |
| Q99729                                                                                | 1             | 2.2754           | K.FHTVSGSK.C                  | 1            | ROAA_HUMAN           |
| Q99729                                                                                | 2             | 3.9658           | R.EYFGEFGEIEAIELPMDPK.L       | 1            | ROAA_HUMAN           |
| Q99729                                                                                | 2             | 3.8806           | K.MFVGGLSWDTSKK.D             | 1            | ROAA_HUMAN           |
| Q99729                                                                                | 2             | 2.9878           | K.VLDQKEHR.L                  | 7            | ROAA_HUMAN           |
| Q99729                                                                                | 2             | 3.0237           | R.EYFGEFGEIEAIELPM#DPK.L      | 1            | ROAA_HUMAN           |
| Q99729                                                                                | 2             | 3.9979           | K.MFVGGLSWDTSK.K              | 3            | ROAA_HUMAN           |
| <b><i>Heterogeneous nuclear ribonucleoprotein A0 - Homo sapiens (Human)</i></b>       |               |                  |                               |              |                      |
| Q13151                                                                                | 2             | 3.9886           | K.AEIIADKQSGK.K               | 3            | ROA0_HUMAN           |
| Q13151                                                                                | 3             | 4.8792           | K.AVPKEDIYSGGGGGSR.S          | 4            | ROA0_HUMAN           |
| Q13151                                                                                | 2             | 5.1984           | K.SGGGGGGSSWGGR.S             | 3            | ROA0_HUMAN           |
| Q13151                                                                                | 3             | 4.6478           | K.GDVAEGDLIEHFSQFGTVEK.A      | 3            | ROA0_HUMAN           |
| <b><i>Heterogeneous nuclear ribonucleoprotein A3 - Homo sapiens (Human)</i></b>       |               |                  |                               |              |                      |
| P51991                                                                                | 2             | 3.0041           | R.GFGFVTYSCVEEVDAAAMCARPHK.V  | 1            | ROA3_HUMAN           |
| P51991                                                                                | 2             | 4.0764           | R.GFAFVTDDHDTVDK.I            | 1            | ROA3_HUMAN           |
| <b><i>Heterogeneous nuclear ribonucleoprotein D0 - Homo sapiens (Human)</i></b>       |               |                  |                               |              |                      |
| Q14103                                                                                | 2             | 5.1801           | K.IDASKNEEDEGHSNSSPR.H        | 7            | HNRPD_HUMAN          |



| <i>Accession No*</i>                                                                | <i>Charge</i> | <i>XC(Max)**</i> | <i>Peptide*</i>                | <i>TC***</i> | <i>Reference No*</i> |
|-------------------------------------------------------------------------------------|---------------|------------------|--------------------------------|--------------|----------------------|
| Q14103                                                                              | 2             | 3.7296           | K.NEEDEGHSNSSPR.H              | 2            | HNRPD_HUMAN          |
| <b><i>Heterogeneous nuclear ribonucleoprotein D-like - Homo sapiens (Human)</i></b> |               |                  |                                |              |                      |
| O14979                                                                              | 2             | 4.0341           | K.MFIGGLSWDTSK.D               | 3            | HNRDL_HUMAN          |
| O14979                                                                              | 2             | 2.8818           | K.KDLTEYLSR.F                  | 2            | HNRDL_HUMAN          |
| O14979                                                                              | 1             | 2.2079           | R.YHQIGSGK.C                   | 1            | HNRDL_HUMAN          |
| O14979                                                                              | 2             | 3.3399           | K.MFIGGLSWDTSK.K               | 2            | HNRDL_HUMAN          |
| O14979                                                                              | 2             | 3.9757           | K.DAASVDKVLK.E                 | 4            | HNRDL_HUMAN          |
| O14979                                                                              | 2             | 3.3567           | K.VFVGGLSPDTSEEQIK.E           | 1            | HNRDL_HUMAN          |
| O14979                                                                              | 2             | 3.0702           | K.DLTEYLSR.F                   | 2            | HNRDL_HUMAN          |
| <b><i>Heterogeneous nuclear ribonucleoprotein F - Homo sapiens (Human)</i></b>      |               |                  |                                |              |                      |
| P52597                                                                              | 2             | 5.6015           | K.ITGEAFVQFASQELAEK.A          | 6            | HNRPF_HUMAN          |
| P52597                                                                              | 3             | 3.7722           | R.VTGEADVEFATHEEAVAAM#SK.D     | 1            | HNRPF_HUMAN          |
| <b><i>Heterogeneous nuclear ribonucleoprotein H' - Homo sapiens (Human)</i></b>     |               |                  |                                |              |                      |
| P55795                                                                              | 2             | 3.9125           | R.ATENDIYNFFSPLNPMR.V          | 3            | HNRH2_HUMAN          |
| P55795                                                                              | 2             | 4.0524           | R.VTGEADVEFATHEDEAVAAMAK.D     | 1            | HNRH2_HUMAN          |
| <b><i>Heterogeneous nuclear ribonucleoprotein H3 - Homo sapiens (Human)</i></b>     |               |                  |                                |              |                      |
| P31942                                                                              | 2             | 4.0002           | R.DGMDNQGGYGSVGR.M             | 8            | HNRH3_HUMAN          |
| P31942                                                                              | 3             | 4.9926           | R.ATGEADVEFVTHEDEAVAAMSK.D     | 8            | HNRH3_HUMAN          |
| P31942                                                                              | 2             | 3.4046           | R.STGEAFVQFASK.E               | 2            | HNRH3_HUMAN          |
| P31942                                                                              | 2             | 2.9241           | R.VHIDIGADGR.A                 | 3            | HNRH3_HUMAN          |
| P31942                                                                              | 2             | 4.079            | R.YIELFLNSTPGGGSGMGGSGMGGYGR.D | 1            | HNRH3_HUMAN          |
| P31942                                                                              | 2             | 4.0196           | R.DGM#DNQGGYGSVGR.M            | 6            | HNRH3_HUMAN          |
| <b><i>Heterogeneous nuclear ribonucleoprotein L - Homo sapiens (Human)</i></b>      |               |                  |                                |              |                      |
| P14866                                                                              | 2             | 3.2107           | R.SSSGLLEWESK.S                | 2            | HNRPL_HUMAN          |
| P14866                                                                              | 3             | 3.8546           | K.SKPGAAMVEMADGYAVDR.A         | 1            | HNRPL_HUMAN          |
| P14866                                                                              | 2             | 2.7752           | R.YYGGGSEGGR.A                 | 1            | HNRPL_HUMAN          |
| <b><i>Heterogeneous nuclear ribonucleoprotein M - Homo sapiens (Human)</i></b>      |               |                  |                                |              |                      |
| P52272                                                                              | 2             | 3.2429           | R.MVPAGMGAGLER.M               | 4            | HNRPM_HUMAN          |
| P52272                                                                              | 2             | 3.1726           | R.MGAGM#GFGLER.M               | 1            | HNRPM_HUMAN          |
| P52272                                                                              | 2             | 3.6859           | R.AFITNIPFDVK.W                | 2            | HNRPM_HUMAN          |
| P52272                                                                              | 2             | 3.0964           | R.M#GAGM#GFGLER.M              | 1            | HNRPM_HUMAN          |
| P52272                                                                              | 2             | 3.0866           | R.M#GAGMGFGLER.M               | 2            | HNRPM_HUMAN          |
| P52272                                                                              | 2             | 3.4149           | R.MGPAMGPALGAGIER.M            | 2            | HNRPM_HUMAN          |
| P52272                                                                              | 2             | 4.2873           | R.M#GPAM#GPALGAGIER.M          | 2            | HNRPM_HUMAN          |

| <i>Accession No*</i> | <i>Charge</i> | <i>XC(Max)**</i> | <i>Peptide*</i>             | <i>TC***</i> | <i>Reference No*</i> |
|----------------------|---------------|------------------|-----------------------------|--------------|----------------------|
| P52272               | 2             | 3.6788           | R.MGAGLGHGMDR.V             | 3            | HNRPM_HUMAN          |
| P52272               | 2             | 3.7028           | K.GIGMGNIGPAGMGMEGIGFGINK.M | 1            | HNRPM_HUMAN          |
| P52272               | 2             | 3.3222           | R.MGPAM#GPALGAGIER.M        | 2            | HNRPM_HUMAN          |
| P52272               | 2             | 4.0917           | R.MGPLGLDHMASSIER.M         | 1            | HNRPM_HUMAN          |
| P52272               | 2             | 4.1213           | R.MGLAM#GGGGGASFDR.A        | 2            | HNRPM_HUMAN          |
| P52272               | 2             | 2.997            | R.INEILSNALK.R              | 1            | HNRPM_HUMAN          |
| P52272               | 2             | 3.413            | K.MGGMEGPFGGGMENMGR.F       | 2            | HNRPM_HUMAN          |
| P52272               | 2             | 3.246            | R.MGANNLER.M                | 3            | HNRPM_HUMAN          |

***Heterogeneous nuclear ribonucleoprotein Q - Homo sapiens (Human)***

|        |   |        |                   |   |             |
|--------|---|--------|-------------------|---|-------------|
| O60506 | 2 | 3.148  | K.DSDLSHVQNK.S    | 3 | HNRPQ_HUMAN |
| O60506 | 2 | 3.1502 | K.VADSSKGPDEAK.I  | 2 | HNRPQ_HUMAN |
| O60506 | 2 | 3.7983 | R.NLANTVTEEILEK.A | 2 | HNRPQ_HUMAN |

***Heterogeneous nuclear ribonucleoprotein U - Homo sapiens (Human)***

|        |   |        |                                   |    |             |
|--------|---|--------|-----------------------------------|----|-------------|
| Q00839 | 3 | 4.0179 | K.AEGGGGGRRPGAPAGDGKTEQK.G        | 3  | HNRPU_HUMAN |
| Q00839 | 2 | 2.839  | K.AEGGGGGRRPGAPAGDGK.T            | 1  | HNRPU_HUMAN |
| Q00839 | 3 | 6.0045 | R.LQAALDDEEAGGRPAMEPGNGSLDLGGDSAG | 8  | HNRPU_HUMAN |
| Q00839 | 3 | 6.0233 | R.LQAALDDEEAGGRPAM#EPGNGSLDLGGDSA | 10 | HNRPU_HUMAN |
| Q00839 | 2 | 3.746  | R.LQAALDDEEAGGR.P                 | 2  | HNRPU_HUMAN |
| Q00839 | 2 | 3.2898 | K.VSELKEELK.R                     | 4  | HNRPU_HUMAN |
| Q00839 | 2 | 4.5047 | K.LKVSELKEELK.K                   | 3  | HNRPU_HUMAN |
| Q00839 | 2 | 3.1581 | K.SSGPTSLFAVTVAPPGAR.Q            | 2  | HNRPU_HUMAN |
| Q00839 | 2 | 3.0457 | K.GLKAELM#ER.L                    | 4  | HNRPU_HUMAN |
| Q00839 | 2 | 3.0212 | K.GLKAELMER.L                     | 3  | HNRPU_HUMAN |
| Q00839 | 2 | 3.4807 | K.VSELKEELK.K                     | 4  | HNRPU_HUMAN |

***Heterogeneous nuclear ribonucleoprotein U-like protein 1 - Homo sapiens (Human)***

|        |   |        |                          |   |             |
|--------|---|--------|--------------------------|---|-------------|
| Q9BUJ2 | 3 | 4.1183 | R.RPLEM#EQQQAYRPEM#K.T   | 1 | HNRL1_HUMAN |
| Q9BUJ2 | 3 | 3.7309 | R.RPLEM#EQQQAYRPEMK.T    | 1 | HNRL1_HUMAN |
| Q9BUJ2 | 3 | 3.8058 | R.QNQFYDTQVIKQENESGYER.R | 3 | HNRL1_HUMAN |
| Q9BUJ2 | 2 | 2.7872 | R.QNQFYDTQVIK.Q          | 1 | HNRL1_HUMAN |
| Q9BUJ2 | 3 | 5.1757 | R.RPLEMEQQQAYRPEMK.T     | 1 | HNRL1_HUMAN |

***Heterogeneous nuclear ribonucleoprotein U-like protein 2 - Homo sapiens (Human)***

|        |   |        |                                 |    |             |
|--------|---|--------|---------------------------------|----|-------------|
| Q1KMD3 | 2 | 3.8963 | K.AAEEQGDDQDSEK.S               | 16 | HNRL2_HUMAN |
| Q1KMD3 | 3 | 3.8215 | R.SGDETPGSEVPGDKAAEEQGDDQDSEK.S | 1  | HNRL2_HUMAN |

***Heterogeneous nuclear ribonucleoproteins A2/B1 - Homo sapiens (Human)***

| <i>Accession No*</i> | <i>Charge</i> | <i>XC(Max)**</i> | <i>Peptide*</i>               | <i>TC***</i> | <i>Reference No*</i> |
|----------------------|---------------|------------------|-------------------------------|--------------|----------------------|
| P22626               | 3             | 4.1689           | R.GGNFGFGDSRGGGGNFGPGPGSNFR.G | 1            | ROA2_HUMAN           |
| P22626               | 2             | 3.3304           | R.QEMQEVQSSR.S                | 3            | ROA2_HUMAN           |
| P22626               | 2             | 5.0492           | R.NM#GGPYGGGNYGPGSGGSGGYGGR.S | 3            | ROA2_HUMAN           |
| P22626               | 2             | 5.0447           | R.NMGGPYGGGNYGPGSGGSGGYGGR.S  | 10           | ROA2_HUMAN           |
| P22626               | 2             | 3.4272           | R.GGGGNFGPGPGSNFR.G           | 10           | ROA2_HUMAN           |
| P22626               | 2             | 2.9042           | R.QEM#QEVQSSR.S               | 2            | ROA2_HUMAN           |
| P22626               | 2             | 2.8307           | K.TLETVPLER.K                 | 2            | ROA2_HUMAN           |
| P22626               | 2             | 3.4464           | R.GGNFGFGDSR.G                | 13           | ROA2_HUMAN           |

***Heterogeneous nuclear ribonucleoproteins C1/C2 - Homo sapiens (Human)***

|        |   |        |                          |    |             |
|--------|---|--------|--------------------------|----|-------------|
| P07910 | 2 | 3.2081 | R.MIAGQVLDINLAAEPK.V     | 1  | HNRPC_HUMAN |
| P07910 | 2 | 2.8319 | K.SEEEEQSSSVK.K          | 1  | HNRPC_HUMAN |
| P07910 | 2 | 2.9922 | K.QAVEM#KNDKSEEEQSSSVK.K | 2  | HNRPC_HUMAN |
| P07910 | 2 | 3.7206 | K.SEEEEQSSSVK.K          | 12 | HNRPC_HUMAN |
| P07910 | 3 | 4.213  | K.NDKSEEEQSSSVK.K        | 1  | HNRPC_HUMAN |
| P07910 | 2 | 4.3275 | K.NDKSEEEQSSSVK.K        | 12 | HNRPC_HUMAN |
| P07910 | 2 | 3.0789 | K.LKGDDLQAIKK.E          | 2  | HNRPC_HUMAN |
| P07910 | 2 | 3.716  | K.GFAFVQYVNER.N          | 2  | HNRPC_HUMAN |

***Hexamethylene bis-acetamide-inducible protein 1. - Homo sapiens (Human)***

|        |   |        |                                   |   |              |
|--------|---|--------|-----------------------------------|---|--------------|
| O94992 | 2 | 4.5156 | K.LGAPAAGGEEEWGQQQR.Q             | 1 | O94992_HUMAN |
| O94992 | 2 | 2.7251 | R.YHTESLQNM#SK.Q                  | 1 | O94992_HUMAN |
| O94992 | 3 | 5.1248 | R.LRAENLQLLTENELHR.Q              | 1 | O94992_HUMAN |
| O94992 | 3 | 3.8501 | R.AFPQLGRRPGPEGEGLSLEQPPPLQTQACPE | 1 | O94992_HUMAN |
| O94992 | 2 | 3.493  | R.YHTESLQNM#SK.Q                  | 5 | O94992_HUMAN |
| O94992 | 2 | 5.0895 | R.AENLQLLTENELHR.Q                | 4 | O94992_HUMAN |

***Hexamethylene bis-acetamide-inducible protein 2. - Homo sapiens (Human)***

|        |   |        |                 |   |              |
|--------|---|--------|-----------------|---|--------------|
| Q96MH2 | 2 | 3.1083 | R.QVEELAAEVQR.L | 1 | Q96MH2_HUMAN |
| Q96MH2 | 2 | 3.3338 | K.RLSQAEETR.R   | 2 | Q96MH2_HUMAN |

***High mobility group nucleosome-binding domain-containing protein 3 - Homo sapiens (Human)***

|        |   |        |                                |   |            |
|--------|---|--------|--------------------------------|---|------------|
| Q15651 | 1 | 2.5984 | K.TESVDNEGE.-                  | 5 | HMG3_HUMAN |
| Q15651 | 3 | 4.4524 | K.EGTAPSENGETKAEQAQTESVDNEGE.- | 6 | HMG3_HUMAN |
| Q15651 | 2 | 4.496  | K.AEEAQTESVDNEGE.-             | 5 | HMG3_HUMAN |

***High mobility group nucleosome-binding domain-containing protein 4 - Homo sapiens (Human)***

|        |   |        |                 |    |            |
|--------|---|--------|-----------------|----|------------|
| O00479 | 2 | 2.94   | R.DASTLQSQK.A   | 10 | HMG4_HUMAN |
| O00479 | 2 | 4.0195 | K.NRDASTLQSQK.A | 9  | HMG4_HUMAN |

| <i>Accession No*</i>                                                              | <i>Charge</i> | <i>XC(Max)**</i> | <i>Peptide*</i>                   | <i>TC***</i> | <i>Reference No*</i> |
|-----------------------------------------------------------------------------------|---------------|------------------|-----------------------------------|--------------|----------------------|
| O00479                                                                            | 3             | 4.6322           | R.DASTLQSQKAEGTGDAK.-             | 5            | HMGN4_HUMAN          |
| <b><i>High mobility group protein B1 - Homo sapiens (Human)</i></b>               |               |                  |                                   |              |                      |
| P09429                                                                            | 3             | 6.0629           | K.KKEEEEEDEEDEEEEEDEEDEDEDEEDDDDD | 1            | HMGB1_HUMAN          |
| <b><i>High mobility group protein B2 - Homo sapiens (Human)</i></b>               |               |                  |                                   |              |                      |
| P26583                                                                            | 2             | 4.2401           | K.IKSEHPGLSIGDTAK.K               | 3            | HMGB2_HUMAN          |
| P26583                                                                            | 1             | 2.707            | K.SK FEDMAK.S                     | 2            | HMGB2_HUMAN          |
| P26583                                                                            | 2             | 2.8739           | K.LGEM#WSEQSAK.D                  | 2            | HMGB2_HUMAN          |
| P26583                                                                            | 3             | 4.619            | K.KHPDSSVNF AEF SK.K              | 4            | HMGB2_HUMAN          |
| P26583                                                                            | 2             | 4.5905           | K.KLGEMWSEQSAK.D                  | 3            | HMGB2_HUMAN          |
| P26583                                                                            | 2             | 4.0295           | K.LGEMWSEQSAK.D                   | 4            | HMGB2_HUMAN          |
| P26583                                                                            | 2             | 3.3837           | K.SEHPGLSIGDTAK.K                 | 3            | HMGB2_HUMAN          |
| <b><i>High mobility group protein HMG-I/HMG-Y - Homo sapiens (Human)</i></b>      |               |                  |                                   |              |                      |
| P17096                                                                            | 2             | 4.0864           | R.KQPPVSPGTALVGSQK.E              | 4            | HMGA1_HUMAN          |
| <b><i>HIRA-interacting protein 3 - Homo sapiens (Human)</i></b>                   |               |                  |                                   |              |                      |
| Q9BW71                                                                            | 2             | 3.6508           | R.EESEESEAE PVQR.T                | 3            | HIRP3_HUMAN          |
| Q9BW71                                                                            | 3             | 4.1825           | R.GRPDLSTLTHSIVR.R                | 1            | HIRP3_HUMAN          |
| <b><i>Histidine triad nucleotide-binding protein 1 - Homo sapiens (Human)</i></b> |               |                  |                                   |              |                      |
| P49773                                                                            | 3             | 5.0302           | K.KHISQISVAEDDDDESLLGHLM#IVGK.K   | 1            | HINT1_HUMAN          |
| P49773                                                                            | 4             | 5.2605           | K.KHISQISVAEDDDDESLLGHLMIVGK.K    | 7            | HINT1_HUMAN          |
| P49773                                                                            | 5             | 5.9189           | K.KHISQISVAEDDDDESLLGHLMIVGKK.C   | 1            | HINT1_HUMAN          |
| P49773                                                                            | 3             | 4.0643           | R.MVVNEGSDGGQSVYHVHLHVLGGR.Q      | 3            | HINT1_HUMAN          |
| P49773                                                                            | 2             | 3.1315           | R.PGGDTIFGK.I                     | 4            | HINT1_HUMAN          |
| P49773                                                                            | 2             | 2.9451           | K.IIFEDDR.C                       | 1            | HINT1_HUMAN          |
| P49773                                                                            | 2             | 3.7881           | K.AQVARPGGDTIFGK.I                | 8            | HINT1_HUMAN          |
| P49773                                                                            | 3             | 5.3533           | K.HISQISVAEDDDDESLLGHLM#IVGK.K    | 2            | HINT1_HUMAN          |
| <b><i>Histidine triad nucleotide-binding protein 2 - Homo sapiens (Human)</i></b> |               |                  |                                   |              |                      |
| Q9BX68                                                                            | 3             | 5.9992           | R.ISQAEEDDQQLLGHLLLVAK.Q          | 5            | HINT2_HUMAN          |
| Q9BX68                                                                            | 2             | 4.783            | K.AQQATPGGAAPTIFSR.I              | 6            | HINT2_HUMAN          |
| Q9BX68                                                                            | 2             | 3.1151           | R.DVAPQAPVHFLVIPK.K               | 3            | HINT2_HUMAN          |
| <b><i>Histidine-rich glycoprotein precursor - Homo sapiens (Human)</i></b>        |               |                  |                                   |              |                      |
| P04196                                                                            | 2             | 4.0666           | R.GGEGTGYFVDFSVR.N                | 4            | HRG_HUMAN            |
| P04196                                                                            | 3             | 5.1597           | K.YKEENDDFASFR.V                  | 8            | HRG_HUMAN            |
| P04196                                                                            | 2             | 3.5918           | K.DSPVLIDFFEDTER.Y                | 5            | HRG_HUMAN            |

| <i>Accession No*</i>                                                            | <i>Charge</i> | <i>XC(Max)**</i> | <i>Peptide*</i>           | <i>TC***</i> | <i>Reference No*</i> |
|---------------------------------------------------------------------------------|---------------|------------------|---------------------------|--------------|----------------------|
| P04196                                                                          | 2             | 3.4064           | K.DSPVLIDFFEDTERYR.K      | 1            | HRG_HUMAN            |
| P04196                                                                          | 2             | 3.9              | R.DGYLFQLLR.I             | 6            | HRG_HUMAN            |
| P04196                                                                          | 2             | 3.5259           | R.RDGYLFQLLR.I            | 4            | HRG_HUMAN            |
| P04196                                                                          | 3             | 6.2783           | R.KGEVLPLPEANFPSFPLPHHK.H | 1            | HRG_HUMAN            |
| P04196                                                                          | 2             | 2.9658           | R.ADLFYDVEALDLESPK.N      | 3            | HRG_HUMAN            |
| <b><i>Histocompatibility - Homo sapiens (Human)</i></b>                         |               |                  |                           |              |                      |
| Q6P189                                                                          | 2             | 3.0014           | R.AGSPSPQPSGELPR.K        | 1            | Q6P189_HUMAN         |
| <b><i>Histone acetyltransferase HTATIP - Homo sapiens (Human)</i></b>           |               |                  |                           |              |                      |
| Q92993                                                                          | 2             | 3.5616           | R.NQDNEDEWPLAEILSVK.D     | 1            | TIP60_HUMAN          |
| <b><i>Histone acetyltransferase MYST2 - Homo sapiens (Human)</i></b>            |               |                  |                           |              |                      |
| O95251                                                                          | 2             | 3.6356           | R.NLQSFSGTEEPAYSTR.R      | 1            | MYST2_HUMAN          |
| <b><i>Histone deacetylase complex subunit SAPI30 - Homo sapiens (Human)</i></b> |               |                  |                           |              |                      |
| Q9H0E3                                                                          | 2             | 3.1048           | R.EHMSSSSSLQSR.E          | 2            | SP130_HUMAN          |
| <b><i>Histone H1.0 - Homo sapiens (Human)</i></b>                               |               |                  |                           |              |                      |
| P07305                                                                          | 2             | 3.8665           | K.VGENADSQIK.L            | 5            | H10_HUMAN            |
| P07305                                                                          | 2             | 3.2748           | K.YSDM#IVAAIQAEK.N        | 1            | H10_HUMAN            |
| P07305                                                                          | 2             | 4.3887           | K.YSDMIVAAIQAEK.N         | 3            | H10_HUMAN            |
| <b><i>Histone H1.5 - Homo sapiens (Human)</i></b>                               |               |                  |                           |              |                      |
| P16401                                                                          | 2             | 4.3291           | R.KATGPPVSELITK.A         | 2            | H15_HUMAN            |
| <b><i>Histone H1x - Homo sapiens (Human)</i></b>                                |               |                  |                           |              |                      |
| Q92522                                                                          | 2             | 3.5417           | K.ALVQNDTLLQVK.G          | 2            | H1X_HUMAN            |
| Q92522                                                                          | 2             | 4.0274           | R.GAPAAATAPAPTAHK.A       | 3            | H1X_HUMAN            |
| Q92522                                                                          | 2             | 3.0447           | K.AGGSAAALSPSKK.R         | 2            | H1X_HUMAN            |
| <b><i>Histone H2A.x - Homo sapiens (Human)</i></b>                              |               |                  |                           |              |                      |
| P16104                                                                          | 2             | 2.7326           | K.KATQASQEY.-             | 1            | H2AX_HUMAN           |
| <b><i>Histone H4 - Homo sapiens (Human)</i></b>                                 |               |                  |                           |              |                      |
| P62805                                                                          | 2             | 3.1521           | R.DAVTYTEHAK.R            | 3            | H4_HUMAN             |
| <b><i>HIV Tat-specific factor 1 - Homo sapiens (Human)</i></b>                  |               |                  |                           |              |                      |
| O43719                                                                          | 2             | 3.1756           | K.MNAQETATGM#AFEETIDEK.K  | 2            | HTSF1_HUMAN          |
| O43719                                                                          | 2             | 3.9984           | K.TEDGGFEFEEGASENNAK.E    | 4            | HTSF1_HUMAN          |
| O43719                                                                          | 2             | 3.4886           | R.RSDSVSASER.A            | 4            | HTSF1_HUMAN          |
| O43719                                                                          | 2             | 2.8535           | K.M#NAQETATGMAFEETIDEK.K  | 2            | HTSF1_HUMAN          |

| <i>Accession No*</i>                                             | <i>Charge</i> | <i>XC(Max)**</i> | <i>Peptide*</i>           | <i>TC***</i> | <i>Reference No*</i> |
|------------------------------------------------------------------|---------------|------------------|---------------------------|--------------|----------------------|
| O43719                                                           | 2             | 3.7445           | R.GWEAFLNAPEANR.G         | 1            | HTSF1_HUMAN          |
| O43719                                                           | 2             | 3.1489           | R.LRGWEAFLNAPEANR.G       | 1            | HTSF1_HUMAN          |
| O43719                                                           | 2             | 4.7074           | K.MNAQETATGMAFEEPIDEK.K   | 4            | HTSF1_HUMAN          |
| <b><i>Homeobox protein cut-like 1 - Homo sapiens (Human)</i></b> |               |                  |                           |              |                      |
| P39880                                                           | 2             | 4.1479           | R.LFGETILGLTQGSVSDLLAR.P  | 2            | CUTL1_HUMAN          |
| P39880                                                           | 2             | 3.027            | R.EMEAQQAALDPALK.Q        | 1            | CUTL1_HUMAN          |
| P39880                                                           | 2             | 3.2492           | K.TIEDLATQLNLK.T          | 1            | CUTL1_HUMAN          |
| P39880                                                           | 2             | 3.8388           | K.TAEPAPQSSASGSGNSDDAIR.S | 2            | CUTL1_HUMAN          |
| <b><i>Homer-3B protein - Homo sapiens (Human)</i></b>            |               |                  |                           |              |                      |
| Q9NSC1                                                           | 2             | 3.2639           | R.LFELSELR.E              | 2            | Q9NSC1_HUMAN         |
| <b><i>Hook homolog 2 - Homo sapiens (Human)</i></b>              |               |                  |                           |              |                      |
| Q96ED9                                                           | 2             | 2.949            | R.LNQQLSELR.A             | 1            | HOOK2_HUMAN          |
| <b><i>Hook homolog 3 - Homo sapiens (Human)</i></b>              |               |                  |                           |              |                      |
| Q86VS8                                                           | 2             | 4.1873           | R.LNQSDSIEDPNPAGR.R       | 3            | HOOK3_HUMAN          |
| <b><i>Host cell factor - Homo sapiens (Human)</i></b>            |               |                  |                           |              |                      |
| P51610                                                           | 2             | 4.2862           | K.VASSPVMVSNPATR.M        | 4            | HCFC1_HUMAN          |
| P51610                                                           | 2             | 4.3605           | K.IATGHGQQGVTQVVLK.G      | 2            | HCFC1_HUMAN          |
| P51610                                                           | 2             | 3.3118           | K.KQELQPGTAYK.F           | 2            | HCFC1_HUMAN          |
| P51610                                                           | 2             | 2.8393           | K.VASSPVM#VSNPATR.M       | 1            | HCFC1_HUMAN          |
| P51610                                                           | 2             | 4.4811           | K.SPISVPGGSALISNLGK.V     | 2            | HCFC1_HUMAN          |
| <b><i>Hsp90 co-chaperone Cdc37 - Homo sapiens (Human)</i></b>    |               |                  |                           |              |                      |
| Q16543                                                           | 2             | 3.3738           | R.SWEQKLEEMR.K            | 3            | CDC37_HUMAN          |
| Q16543                                                           | 2             | 2.9139           | R.LQAEAQQLR.K             | 2            | CDC37_HUMAN          |
| Q16543                                                           | 2             | 3.5866           | K.EGEEAGPGDPLLEAVPK.T     | 1            | CDC37_HUMAN          |
| <b><i>HSPA5 protein - Homo sapiens (Human)</i></b>               |               |                  |                           |              |                      |
| Q2KHP4                                                           | 2             | 4.5313           | K.KSDIDEIVLVGGSTR.I       | 2            | Q2KHP4_HUMAN         |
| Q2KHP4                                                           | 2             | 4.2358           | K.DAGTIAGLNVN#R.I         | 5            | Q2KHP4_HUMAN         |
| Q2KHP4                                                           | 2             | 4.6562           | K.DAGTIAGLNVMR.I          | 4            | Q2KHP4_HUMAN         |
| Q2KHP4                                                           | 2             | 2.8068           | K.DNHLLGTFDLTGIPPAPR.G    | 1            | Q2KHP4_HUMAN         |
| Q2KHP4                                                           | 2             | 3.1329           | K.FAEEDKK.L               | 9            | Q2KHP4_HUMAN         |
| Q2KHP4                                                           | 3             | 4.7859           | K.TFAPEEISAMVLTK.M        | 7            | Q2KHP4_HUMAN         |
| Q2KHP4                                                           | 3             | 4.868            | K.IEWLESHQDADIEDFKAK.K    | 3            | Q2KHP4_HUMAN         |
| Q2KHP4                                                           | 3             | 5.0016           | K.AVEEKIEWLESHQDADIEDFK.A | 1            | Q2KHP4_HUMAN         |

| <i>Accession No*</i> | <i>Charge</i> | <i>XC(Max)**</i> | <i>Peptide*</i>             | <i>TC***</i> | <i>Reference No*</i> |
|----------------------|---------------|------------------|-----------------------------|--------------|----------------------|
| Q2KHP4               | 2             | 3.816            | K.SQIFSTASDNQPTVTIK.V       | 2            | Q2KHP4_HUMAN         |
| Q2KHP4               | 2             | 2.9196           | K.VYEGERPLTK.D              | 2            | Q2KHP4_HUMAN         |
| Q2KHP4               | 3             | 6.1898           | K.AVEEKIEWLESHQDADIEDFKAK.K | 2            | Q2KHP4_HUMAN         |
| Q2KHP4               | 3             | 4.5089           | K.KTKPYIQVDIGGGQTK.T        | 2            | Q2KHP4_HUMAN         |
| Q2KHP4               | 3             | 4.5817           | K.M#KETAEAYLGKK.V           | 1            | Q2KHP4_HUMAN         |
| Q2KHP4               | 3             | 4.562            | K.MKETAEAYLGKK.V            | 2            | Q2KHP4_HUMAN         |
| Q2KHP4               | 2             | 3.2416           | K.NKITITNDQNR.L             | 3            | Q2KHP4_HUMAN         |
| Q2KHP4               | 2             | 3.0953           | K.FEELNMDLFR.S              | 2            | Q2KHP4_HUMAN         |
| Q2KHP4               | 2             | 4.5772           | K.KKELEEIVQPIISK.L          | 3            | Q2KHP4_HUMAN         |
| Q2KHP4               | 2             | 3.8335           | K.TFAPEEISAM#VLTK.M         | 3            | Q2KHP4_HUMAN         |
| Q2KHP4               | 3             | 4.9503           | R.AKFEELNMDLFR.S            | 4            | Q2KHP4_HUMAN         |
| Q2KHP4               | 2             | 3.9788           | R.IDTRNELESYAYSLK.N         | 6            | Q2KHP4_HUMAN         |
| Q2KHP4               | 2             | 3.0004           | K.ITITNDQNR.L               | 3            | Q2KHP4_HUMAN         |
| Q2KHP4               | 2             | 2.9746           | K.VLESDLKK.S                | 1            | Q2KHP4_HUMAN         |
| Q2KHP4               | 3             | 4.8223           | K.VLESDLKKSDIDEIVLVGGSTR.I  | 4            | Q2KHP4_HUMAN         |
| Q2KHP4               | 3             | 4.4768           | K.VTHAVVTVPAYFNDAQR.Q       | 3            | Q2KHP4_HUMAN         |
| Q2KHP4               | 2             | 3.4878           | K.SDIDEIVLVGGSTR.I          | 4            | Q2KHP4_HUMAN         |
| Q2KHP4               | 2             | 4.145            | R.ITPSYVAFTPEGER.L          | 5            | Q2KHP4_HUMAN         |
| Q2KHP4               | 2             | 4.0464           | R.MVNDAEKFAEEDKK.L          | 1            | Q2KHP4_HUMAN         |
| Q2KHP4               | 2             | 3.6194           | R.NELESYAYSLK.N             | 4            | Q2KHP4_HUMAN         |
| Q2KHP4               | 2             | 3.787            | R.TWNDPSVQQDIK.F            | 4            | Q2KHP4_HUMAN         |
| Q2KHP4               | 2             | 2.7336           | R.VMEHFIK.L                 | 1            | Q2KHP4_HUMAN         |
| Q2KHP4               | 2             | 3.1777           | K.NQLTSNPENTVFDAGR.L        | 1            | Q2KHP4_HUMAN         |
| Q2KHP4               | 2             | 5.0247           | R.AKFEELNM#DLFR.S           | 7            | Q2KHP4_HUMAN         |
| Q2KHP4               | 3             | 4.9654           | K.TKPYIQVDIGGGQTK.T         | 6            | Q2KHP4_HUMAN         |
| Q2KHP4               | 2             | 3.9559           | K.NQLTSNPENTVFDAGR.R        | 3            | Q2KHP4_HUMAN         |

***HSPC323 - Homo sapiens (Human)***

|        |   |        |                     |   |              |
|--------|---|--------|---------------------|---|--------------|
| Q9P059 | 2 | 3.6853 | R.MESNLYQDQSEDKR.E  | 5 | Q9P059_HUMAN |
| Q9P059 | 2 | 2.8552 | R.M#ESNLYQDQSEDKR.E | 1 | Q9P059_HUMAN |

***HSRBC protein - Homo sapiens (Human)***

|        |   |        |                     |   |              |
|--------|---|--------|---------------------|---|--------------|
| Q969G5 | 3 | 4.3441 | R.KGPAAPPPTPVKPPR.L | 2 | Q969G5_HUMAN |
|--------|---|--------|---------------------|---|--------------|

***Huntingtin-interacting protein HYPK - Homo sapiens (Human)***

|        |   |        |                         |   |            |
|--------|---|--------|-------------------------|---|------------|
| Q9NX55 | 2 | 2.9952 | R.EHM#GNVVEALIALTN.-    | 2 | HYPK_HUMAN |
| Q9NX55 | 3 | 5.0794 | K.VTIKKEDLELIMTEMEISR.A | 1 | HYPK_HUMAN |
| Q9NX55 | 2 | 3.3971 | K.EIQSSNLETAMSVIGDR.R   | 1 | HYPK_HUMAN |

| <i>Accession No*</i>                                                                               | <i>Charge</i> | <i>XC(Max)**</i> | <i>Peptide*</i>                 | <i>TC***</i> | <i>Reference No*</i> |
|----------------------------------------------------------------------------------------------------|---------------|------------------|---------------------------------|--------------|----------------------|
| Q9NX55                                                                                             | 2             | 4.744            | K.KEDLELIMTEMEISR.A             | 1            | HYPK_HUMAN           |
| Q9NX55                                                                                             | 2             | 4.4231           | R.EHMGNVVEALIALTN.-             | 4            | HYPK_HUMAN           |
| Q9NX55                                                                                             | 3             | 4.7483           | R.KHDSGAADLER.V                 | 3            | HYPK_HUMAN           |
| <b><i>Hydroxyacyl-coenzyme A dehydrogenase, mitochondrial precursor - Homo sapiens (Human)</i></b> |               |                  |                                 |              |                      |
| Q16836                                                                                             | 3             | 4.448            | K.LGAGYPM#GPFELLDYVGLDTTK.F     | 1            | HCDH_HUMAN           |
| Q16836                                                                                             | 2             | 5.2404           | K.LGAGYPMGPFELLDYVGLDTTK.F      | 6            | HCDH_HUMAN           |
| Q16836                                                                                             | 2             | 3.5859           | R.GDASKEDIDTAMK.L               | 2            | HCDH_HUMAN           |
| <b><i>Hydroxyacylglutathione hydrolase - Homo sapiens (Human)</i></b>                              |               |                  |                                 |              |                      |
| Q16775                                                                                             | 2             | 4.5111           | K.TVQQHAGETDPVTTM#R.A           | 2            | GLO2_HUMAN           |
| <b><i>Hydroxymethylglutaryl-CoA synthase, cytoplasmic - Homo sapiens (Human)</i></b>               |               |                  |                                 |              |                      |
| Q01581                                                                                             | 2             | 3.3812           | R.LPATAAEPEAAVISNGEH.-          | 1            | HMCS1_HUMAN          |
| <b><i>Hypothetical gene supported by AK125122 - Homo sapiens (Human)</i></b>                       |               |                  |                                 |              |                      |
| A1L170                                                                                             | 2             | 2.8269           | K.DSQDESKLK.M                   | 2            | A1L170_HUMAN         |
| <b><i>Hypoxia up-regulated protein 1 precursor - Homo sapiens (Human)</i></b>                      |               |                  |                                 |              |                      |
| Q9Y4L1                                                                                             | 3             | 5.3353           | K.NINADEAAAAMGAVYQAAALSK.A      | 2            | HYOU1_HUMAN          |
| Q9Y4L1                                                                                             | 2             | 2.9876           | R.LAGLFNEQR.K                   | 2            | HYOU1_HUMAN          |
| Q9Y4L1                                                                                             | 2             | 4.4216           | K.AEAGPEGVAPAPEGEK.K            | 3            | HYOU1_HUMAN          |
| Q9Y4L1                                                                                             | 3             | 4.0438           | R.SLAEDFAEQPIKDAVITVPVFFNQAER.R | 1            | HYOU1_HUMAN          |
| Q9Y4L1                                                                                             | 2             | 4.2624           | K.AANSLEAFIFETQDK.L             | 1            | HYOU1_HUMAN          |
| Q9Y4L1                                                                                             | 3             | 4.7857           | R.LIPEM#DQIFTEVEMTTLEK.V        | 2            | HYOU1_HUMAN          |
| Q9Y4L1                                                                                             | 2             | 3.75             | K.AEAGPEGVAPAPEGEKK.Q           | 1            | HYOU1_HUMAN          |
| Q9Y4L1                                                                                             | 2             | 3.4688           | R.DAVVYPILVEFTR.E               | 3            | HYOU1_HUMAN          |
| Q9Y4L1                                                                                             | 2             | 2.7464           | K.GDATPEGEKATEK.E               | 1            | HYOU1_HUMAN          |
| Q9Y4L1                                                                                             | 3             | 4.6238           | K.LSAASTWLEDEGVGATTVMLK.E       | 3            | HYOU1_HUMAN          |
| Q9Y4L1                                                                                             | 2             | 3.1627           | K.LGNTISSLFGGGTPDAK.E           | 1            | HYOU1_HUMAN          |
| Q9Y4L1                                                                                             | 3             | 3.9015           | R.LIPEMDQIFTEVEM#TTLEK.V        | 2            | HYOU1_HUMAN          |
| Q9Y4L1                                                                                             | 2             | 3.2712           | K.LQDLTLRDLEK.Q                 | 1            | HYOU1_HUMAN          |
| <b><i>ICOS ligand precursor - Homo sapiens (Human)</i></b>                                         |               |                  |                                 |              |                      |
| O75144                                                                                             | 2             | 3.016            | R.GLYDVVSVLR.I                  | 1            | ICOSL_HUMAN          |
| <b><i>Ig kappa chain V-I region Wes - Homo sapiens (Human)</i></b>                                 |               |                  |                                 |              |                      |
| P01611                                                                                             | 2             | 4.007            | -.DIQM#TQSPSSVSASVGDR.V         | 2            | KV119_HUMAN          |
| <b><i>Ig lambda chain V-III region SH - Homo sapiens (Human)</i></b>                               |               |                  |                                 |              |                      |
| P01714                                                                                             | 2             | 4.4983           | -.SELTQDPAVSVALGQTVR.I          | 1            | LV301_HUMAN          |



Accession No\* Charge XC(Max)\*\* Peptide\* TC\*\*\* Reference No\*

***Immature colon carcinoma transcript 1 protein precursor - Homo sapiens (Human)***

Q14197 2 2.8182 R.SSGPGGQNVNK.V 1 ICT1\_HUMAN

***Immunity-related GTPase family Q protein - Homo sapiens (Human)***

Q8WZA9 2 4.1449 K.NAGGGGLENALSK.G 2 IRGQ\_HUMAN

Q8WZA9 2 2.7905 R.AALQSQAELRR.L 1 IRGQ\_HUMAN

Q8WZA9 3 5.1474 R.LLPPAQDGFVGLGAAELEAVR.E 3 IRGQ\_HUMAN

***Immunoglobulin J chain - Homo sapiens (Human)***

P01591 1 2.115 R.IVLVDNK.C 1 IGJ\_HUMAN

P01591 2 2.8883 R.SSEDPNEDIVER.N 3 IGJ\_HUMAN

***Immunoglobulin-binding protein 1 - Homo sapiens (Human)***

P78318 3 5.6736 K.AAQQQEEQEEKEEEDDEQTLHR.A 2 IGBP1\_HUMAN

***Import inner membrane translocase subunit TIM44, mitochondrial precursor - Homo sapiens (Hu***

O43615 2 2.9506 K.EIDDSVLGQTGPYR.R 1 TIM44\_HUMAN

O43615 2 2.741 R.KIKEGVVEAAK.T 1 TIM44\_HUMAN

O43615 2 4.5686 R.RLEESDVLQEAR.R 4 TIM44\_HUMAN

***Import inner membrane translocase subunit TIM50, mitochondrial precursor - Homo sapiens (Hu***

Q3ZCQ8 2 2.8738 R.LEQEEQQR.L 1 TIM50\_HUMAN

***Inactive phospholipase C-like protein 2 - Homo sapiens (Human)***

Q9UPR0 2 4.2166 R.GGAAGGALPTSPGPALGAK.G 2 PLCL2\_HUMAN

***InaD-like protein - Homo sapiens (Human)***

Q8NI35 2 5.0422 R.IGDELLEINNQILYGR.S 2 INADL\_HUMAN

Q8NI35 2 5.3334 K.NAGNPVVFIVQSLSTPR.V 5 INADL\_HUMAN

Q8NI35 2 3.4245 R.LFDDEASVDEPR.R 1 INADL\_HUMAN

Q8NI35 2 2.7766 R.SHQNASAIK.T 1 INADL\_HUMAN

Q8NI35 2 4.9827 R.M#SIFVVGINPEGPAAADGR.M 2 INADL\_HUMAN

Q8NI35 2 4.588 K.SPLFNQILTQQSIK.Q 2 INADL\_HUMAN

Q8NI35 3 3.9636 K.ILEVSGVDLQNASHSEAVEAIK.N 1 INADL\_HUMAN

Q8NI35 3 5.5123 R.GSPLGDIPVFIAMIQASGVAAR.T 3 INADL\_HUMAN

Q8NI35 2 3.9906 K.IGGTNVQGMTSEQVAQVLR.N 1 INADL\_HUMAN

Q8NI35 3 6.692 K.GFRDEPYFKEELVDEPFLDLGK.S 2 INADL\_HUMAN

Q8NI35 2 3.4154 K.ALTDDSDENEEEDAFTDQK.I 4 INADL\_HUMAN

Q8NI35 2 5.0023 R.MSIFVVGINPEGPAAADGR.M 2 INADL\_HUMAN

Q8NI35 3 5.5207 R.GSPLGDIPVFIAM#IQASGVAAR.T 1 INADL\_HUMAN

| <i>Accession No*</i>                                                                        | <i>Charge</i> | <i>XC(Max)**</i> | <i>Peptide*</i>              | <i>TC***</i> | <i>Reference No*</i> |
|---------------------------------------------------------------------------------------------|---------------|------------------|------------------------------|--------------|----------------------|
| <b><i>Inner nuclear membrane protein Man1 - Homo sapiens (Human)</i></b>                    |               |                  |                              |              |                      |
| Q9Y2U8                                                                                      | 2             | 4.1736           | R.ISASGPESLLGGPGGASAAPAGSK.V | 2            | MAN1_HUMAN           |
| Q9Y2U8                                                                                      | 3             | 3.934            | K.KLREEEQQHR.S               | 1            | MAN1_HUMAN           |
| Q9Y2U8                                                                                      | 3             | 4.1981           | K.LREEEQQHR.S                | 3            | MAN1_HUMAN           |
| Q9Y2U8                                                                                      | 2             | 4.147            | R.ENYSDSSEEDDDVASSR.Q        | 1            | MAN1_HUMAN           |
| Q9Y2U8                                                                                      | 2             | 4.376            | K.APPAPLAASEVTNSNSAER.R      | 1            | MAN1_HUMAN           |
| Q9Y2U8                                                                                      | 2             | 5.0822           | K.VLLGFSSDES DVEASPR.D       | 2            | MAN1_HUMAN           |
| <b><i>Inositol polyphosphate phosphatase-like protein 1 - Homo sapiens (Human)</i></b>      |               |                  |                              |              |                      |
| O15357                                                                                      | 2             | 4.7604           | K.TLSEVDYAPAGPAR.S           | 4            | O15357_HUMAN         |
| <b><i>Inositol-trisphosphate 3-kinase B - Homo sapiens (Human)</i></b>                      |               |                  |                              |              |                      |
| P27987                                                                                      | 2             | 3.474            | R.QGQFLGSETSPAPER.G          | 2            | IP3KB_HUMAN          |
| P27987                                                                                      | 2             | 3.6605           | R.GTGVQSEGTWESQR.Q           | 2            | IP3KB_HUMAN          |
| P27987                                                                                      | 2             | 4.1357           | K.SGGGPGPSGSETPPPPR.R        | 1            | IP3KB_HUMAN          |
| <b><i>Insulin receptor substrate 1 - Homo sapiens (Human)</i></b>                           |               |                  |                              |              |                      |
| P35568                                                                                      | 2             | 3.7028           | R.QSYVDTPAAPVSYADMR.T        | 1            | IRS1_HUMAN           |
| <b><i>Insulin receptor substrate 2 insertion mutant - Homo sapiens (Human)</i></b>          |               |                  |                              |              |                      |
| Q96RG5                                                                                      | 2             | 6.1861           | R.TASEGDGGAAGAAAAGAR.P       | 2            | Q96RG5_HUMAN         |
| <b><i>Insulin-like growth factor 2 mRNA-binding protein 1 - Homo sapiens (Human)</i></b>    |               |                  |                              |              |                      |
| Q9NZI8                                                                                      | 2             | 2.9141           | R.DQTPDENDQVIVK.I            | 1            | IF2B1_HUMAN          |
| <b><i>Insulin-like growth factor-binding protein 4 precursor - Homo sapiens (Human)</i></b> |               |                  |                              |              |                      |
| P22692                                                                                      | 3             | 4.1016           | K.TGVKLPGGLEPK.G             | 1            | IBP4_HUMAN           |
| <b><i>Insulin-like growth factor-binding protein 5 precursor - Homo sapiens (Human)</i></b> |               |                  |                              |              |                      |
| P24593                                                                                      | 2             | 3.1779           | R.HMEASLQELK.A               | 4            | IBP5_HUMAN           |
| <b><i>Insulin-like growth factor-binding protein 6 precursor - Homo sapiens (Human)</i></b> |               |                  |                              |              |                      |
| P24592                                                                                      | 2             | 3.9261           | R.APAVAEENPK.E               | 4            | IBP6_HUMAN           |
| P24592                                                                                      | 2             | 4.982            | R.HLDSVLQQLQTEVYR.G          | 3            | IBP6_HUMAN           |
| <b><i>Insulin-like growth factor-binding protein 7 precursor - Homo sapiens (Human)</i></b> |               |                  |                              |              |                      |
| Q16270                                                                                      | 2             | 3.7503           | K.ITVVDALHEIPVK.K            | 2            | IBP7_HUMAN           |
| Q16270                                                                                      | 3             | 4.5044           | R.GGPEKHEVTGWVLVSPLSK.E      | 1            | IBP7_HUMAN           |
| Q16270                                                                                      | 2             | 3.528            | R.TELLPGDRDNLAIQTR.G         | 2            | IBP7_HUMAN           |
| <b><i>Integrator complex subunit 12 - Homo sapiens (Human)</i></b>                          |               |                  |                              |              |                      |
| Q96CB8                                                                                      | 2             | 3.2231           | K.TTSESSSSPASLK.G            | 1            | INT12_HUMAN          |

| <i>Accession No*</i>                                                                                            | <i>Charge</i> | <i>XC(Max)**</i> | <i>Peptide*</i>                  | <i>TC***</i> | <i>Reference No*</i> |
|-----------------------------------------------------------------------------------------------------------------|---------------|------------------|----------------------------------|--------------|----------------------|
| Q96CB8                                                                                                          | 2             | 4.0631           | K.GPTSQESQLNAMK.R                | 2            | INT12_HUMAN          |
| <b><i>Integrator complex subunit 7 - Homo sapiens (Human)</i></b>                                               |               |                  |                                  |              |                      |
| Q9NVH2                                                                                                          | 2             | 2.8205           | K.ISEM#IQGLATPVDLK.L             | 1            | INT7_HUMAN           |
| <b><i>Integrin alpha-1 precursor - Homo sapiens (Human)</i></b>                                                 |               |                  |                                  |              |                      |
| P56199                                                                                                          | 2             | 3.4189           | K.WVLIGSPLVGQPK.N                | 2            | ITA1_HUMAN           |
| P56199                                                                                                          | 2             | 2.8026           | K.SGSFPMPELK.L                   | 1            | ITA1_HUMAN           |
| P56199                                                                                                          | 3             | 4.8102           | R.TIVHYSPNLVFSGIEAIQK.D          | 4            | ITA1_HUMAN           |
| <b><i>Integrin alpha-3 precursor - Homo sapiens (Human)</i></b>                                                 |               |                  |                                  |              |                      |
| P26006                                                                                                          | 2             | 3.49             | R.LQSFFGGTVMGESGMK.T             | 1            | ITA3_HUMAN           |
| P26006                                                                                                          | 2             | 3.0675           | R.VNGWATLFLR.T                   | 1            | ITA3_HUMAN           |
| <b><i>Integrin alpha-5 precursor - Homo sapiens (Human)</i></b>                                                 |               |                  |                                  |              |                      |
| P08648                                                                                                          | 2             | 2.8791           | R.LLESSLSSEGEPEVEYK.S            | 1            | ITA5_HUMAN           |
| <b><i>Integrin alpha-7 precursor [Contains: Integrin alpha-7 heavy chain; Integrin alpha-7 light chain]</i></b> |               |                  |                                  |              |                      |
| Q13683                                                                                                          | 4             | 4.8168           | R.REGPDAHPILAADGHPELGPDPGHPGTA.- | 1            | ITA7_HUMAN           |
| <b><i>Integrin alpha-V precursor - Homo sapiens (Human)</i></b>                                                 |               |                  |                                  |              |                      |
| P06756                                                                                                          | 2             | 2.943            | R.MFLLVGAPK.A                    | 1            | ITAV_HUMAN           |
| P06756                                                                                                          | 2             | 4.7119           | R.STGLNAVPSQILEGQWAAR.S          | 1            | ITAV_HUMAN           |
| P06756                                                                                                          | 2             | 3.1013           | K.YNNQLATR.T                     | 1            | ITAV_HUMAN           |
| P06756                                                                                                          | 2             | 3.0324           | K.LNGFEVFAR.F                    | 2            | ITAV_HUMAN           |
| <b><i>Integrin, beta 1 - Homo sapiens (Human)</i></b>                                                           |               |                  |                                  |              |                      |
| Q8WUM6                                                                                                          | 3             | 4.6254           | K.LKPEDITQIQPQQLVLR.L            | 5            | Q8WUM6_HUMAN         |
| <b><i>Intercellular adhesion molecule 2 precursor - Homo sapiens (Human)</i></b>                                |               |                  |                                  |              |                      |
| P13598                                                                                                          | 3             | 4.142            | R.VPTVEPLDSLTLFLFR.G             | 1            | ICAM2_HUMAN          |
| P13598                                                                                                          | 2             | 4.3061           | R.QVILTLPPTLVAVGK.S              | 3            | ICAM2_HUMAN          |
| <b><i>Interferon regulatory factor 2-binding protein 1 - Homo sapiens (Human)</i></b>                           |               |                  |                                  |              |                      |
| Q53EL7                                                                                                          | 2             | 2.9769           | K.DPGGGGGPVR.A                   | 2            | Q53EL7_HUMAN         |
| Q53EL7                                                                                                          | 3             | 3.9909           | R.AGGASPAASSTAQPPTQHR.L          | 1            | Q53EL7_HUMAN         |
| Q53EL7                                                                                                          | 2             | 3.2842           | K.NVAEALGHSPK.D                  | 2            | Q53EL7_HUMAN         |
| <b><i>Interleukin enhancer-binding factor 3 - Homo sapiens (Human)</i></b>                                      |               |                  |                                  |              |                      |
| Q12906                                                                                                          | 2             | 3.2099           | K.FNYSGSGGR.S                    | 2            | ILF3_HUMAN           |
| Q12906                                                                                                          | 2             | 4.3501           | K.VLQDM#GLPTGAEGR.D              | 2            | ILF3_HUMAN           |
| Q12906                                                                                                          | 2             | 3.811            | K.VLQDMGLPTGAEGR.D               | 1            | ILF3_HUMAN           |

| <i>Accession No*</i>                                                                                       | <i>Charge</i> | <i>XC(Max)**</i> | <i>Peptide*</i>                   | <i>TC***</i> | <i>Reference No*</i> |
|------------------------------------------------------------------------------------------------------------|---------------|------------------|-----------------------------------|--------------|----------------------|
| Q12906                                                                                                     | 1             | 4.3147           | K.AYAALAALEK.L                    | 7            | ILF3_HUMAN           |
| Q12906                                                                                                     | 3             | 5.899            | R.SGGNSYSGSGGASYNPGSHGGYGGGSGGGSS | 2            | ILF3_HUMAN           |
| <b><i>Intersectin-2 - Homo sapiens (Human)</i></b>                                                         |               |                  |                                   |              |                      |
| Q9NZM3                                                                                                     | 2             | 2.7957           | K.DQESFGSASK.S                    | 1            | ITSN2_HUMAN          |
| Q9NZM3                                                                                                     | 2             | 3.3321           | K.SMSGYLSGFQAR.N                  | 2            | ITSN2_HUMAN          |
| Q9NZM3                                                                                                     | 2             | 3.7707           | K.LQGQQLPVVLPPIMK.Q               | 1            | ITSN2_HUMAN          |
| Q9NZM3                                                                                                     | 2             | 3.0538           | K.AGQPLPLTLPELVPPSFR.G            | 1            | ITSN2_HUMAN          |
| <b><i>Intracellular hyaluronan-binding protein 4 - Homo sapiens (Human)</i></b>                            |               |                  |                                   |              |                      |
| Q5JVS0                                                                                                     | 4             | 4.7351           | K.YRDDMVKDDYEDDSHVFR.K            | 1            | HABP4_HUMAN          |
| Q5JVS0                                                                                                     | 3             | 4.2176           | R.FHQLLDDSDPFDILR.E               | 2            | HABP4_HUMAN          |
| Q5JVS0                                                                                                     | 2             | 2.8963           | R.KPESTVPSK.A                     | 4            | HABP4_HUMAN          |
| Q5JVS0                                                                                                     | 2             | 3.199            | R.RAENYGPR.A                      | 4            | HABP4_HUMAN          |
| <b><i>Ionized calcium-binding adapter molecule 2 - Homo sapiens (Human)</i></b>                            |               |                  |                                   |              |                      |
| Q9BQI0                                                                                                     | 2             | 2.8352           | R.DFVNMMGLK.R                     | 2            | IBA2_HUMAN           |
| Q9BQI0                                                                                                     | 2             | 4.6347           | K.ANESSPKPVGPPPER.D               | 3            | IBA2_HUMAN           |
| <b><i>IQ motif and Sec7 domain-containing protein 1 - Homo sapiens (Human)</i></b>                         |               |                  |                                   |              |                      |
| Q6DN90                                                                                                     | 2             | 4.3242           | K.SPAPSSDFADAITELEDAFSR.Q         | 2            | IQEC1_HUMAN          |
| Q6DN90                                                                                                     | 2             | 2.7758           | R.SLGGQQGSPK.H                    | 1            | IQEC1_HUMAN          |
| <b><i>Iron-responsive element-binding protein 1 - Homo sapiens (Human)</i></b>                             |               |                  |                                   |              |                      |
| P21399                                                                                                     | 2             | 4.0783           | R.YQQAGLPLIVLAGK.E                | 2            | IREB1_HUMAN          |
| <b><i>Iron-sulfur cluster assembly 2 homolog, mitochondrial precursor - Homo sapiens (Human)</i></b>       |               |                  |                                   |              |                      |
| Q86U28                                                                                                     | 2             | 2.9831           | K.GAQVDFSQELIR.S                  | 1            | ISCA2_HUMAN          |
| Q86U28                                                                                                     | 2             | 3.8834           | K.FSLDTVINPDDR.V                  | 2            | ISCA2_HUMAN          |
| Q86U28                                                                                                     | 2             | 3.6364           | R.EASSSSPEAGEGQIR.L               | 2            | ISCA2_HUMAN          |
| Q86U28                                                                                                     | 2             | 4.4228           | R.VVVDSDSLAFVK.G                  | 7            | ISCA2_HUMAN          |
| Q86U28                                                                                                     | 2             | 3.4431           | R.LLEITEGSEFLR.L                  | 2            | ISCA2_HUMAN          |
| <b><i>Iron-sulfur cluster assembly enzyme ISCU, mitochondrial precursor - Homo sapiens (Human)</i></b>     |               |                  |                                   |              |                      |
| Q9H1K1                                                                                                     | 2             | 2.8545           | K.GKTVEEALTIK.N                   | 1            | ISCU_HUMAN           |
| Q9H1K1                                                                                                     | 2             | 3.3599           | K.TVEEALTIK.N                     | 1            | ISCU_HUMAN           |
| Q9H1K1                                                                                                     | 1             | 2.5965           | R.NVGSLDK.T                       | 2            | ISCU_HUMAN           |
| <b><i>Isocitrate dehydrogenase [NAD] subunit alpha, mitochondrial precursor - Homo sapiens (Human)</i></b> |               |                  |                                   |              |                      |
| P50213                                                                                                     | 2             | 2.7665           | K.APIQWEER.N                      | 1            | IDH3A_HUMAN          |
| <b><i>Isocitrate dehydrogenase [NADP] cytoplasmic - Homo sapiens (Human)</i></b>                           |               |                  |                                   |              |                      |

| <i>Accession No*</i>                                                                         | <i>Charge</i> | <i>XC(Max)**</i> | <i>Peptide*</i>                   | <i>TC***</i> | <i>Reference No*</i> |
|----------------------------------------------------------------------------------------------|---------------|------------------|-----------------------------------|--------------|----------------------|
| O75874                                                                                       | 2             | 3.9102           | R.SDYLNTEFEFMDK.L                 | 2            | IDHC_HUMAN           |
| O75874                                                                                       | 2             | 2.9878           | R.DATNDQVTK.D                     | 2            | IDHC_HUMAN           |
| <b><i>IWS1 homolog - Homo sapiens (Human)</i></b>                                            |               |                  |                                   |              |                      |
| Q96ST2                                                                                       | 3             | 4.9203           | K.LINEWSRPIFGLTSNYK.G             | 1            | IWS1_HUMAN           |
| Q96ST2                                                                                       | 2             | 3.4539           | R.PIFGLTSNYK.G                    | 2            | IWS1_HUMAN           |
| Q96ST2                                                                                       | 2             | 3.9006           | K.GPASDSETEDASR.H                 | 2            | IWS1_HUMAN           |
| Q96ST2                                                                                       | 2             | 2.9698           | K.ILQELPSVSQETLK.H                | 1            | IWS1_HUMAN           |
| Q96ST2                                                                                       | 2             | 3.2775           | R.DGGTFISDADDVVSAMIVK.M           | 1            | IWS1_HUMAN           |
| Q96ST2                                                                                       | 2             | 2.9477           | R.DLEQM#PQR.R                     | 1            | IWS1_HUMAN           |
| Q96ST2                                                                                       | 3             | 4.2633           | K.KLTLLPAVVMHLK.K                 | 1            | IWS1_HUMAN           |
| <b><i>JmjC domain-containing histone demethylation protein 2B - Homo sapiens (Human)</i></b> |               |                  |                                   |              |                      |
| Q7LBC6                                                                                       | 2             | 3.3695           | K.GGNASGEPGLDQR.A                 | 2            | JHD2B_HUMAN          |
| Q7LBC6                                                                                       | 2             | 5.0291           | R.ISDTGLAAGTVPEK.Q                | 3            | JHD2B_HUMAN          |
| Q7LBC6                                                                                       | 2             | 3.0941           | R.SVLGTDTKPGSK.A                  | 1            | JHD2B_HUMAN          |
| <b><i>Kelch repeat and BTB domain-containing protein 11 - Homo sapiens (Human)</i></b>       |               |                  |                                   |              |                      |
| O94819                                                                                       | 2             | 4.837            | R.QWEAGSAGAASPEELASPEER.A         | 3            | KBTBB_HUMAN          |
| <b><i>Keratin, type I cytoskeletal 10 - Homo sapiens (Human)</i></b>                         |               |                  |                                   |              |                      |
| P13645                                                                                       | 2             | 5.3785           | K.GSLGGGFSSGGFSGGSFSR.G           | 5            | K1C10_HUMAN          |
| <b><i>Keratin, type I cytoskeletal 18 - Homo sapiens (Human)</i></b>                         |               |                  |                                   |              |                      |
| P05783                                                                                       | 2             | 3.1033           | R.QAQEYEALLNIK.V                  | 4            | K1C18_HUMAN          |
| P05783                                                                                       | 3             | 5.4246           | R.GGMGSGGLATGIAGGLAGMGGIQNEKETMQS | 1            | K1C18_HUMAN          |
| P05783                                                                                       | 2             | 3.1495           | K.ASLENSLR.E                      | 2            | K1C18_HUMAN          |
| P05783                                                                                       | 2             | 4.183            | R.GGMGSGGLATGIAGGLAGMGGIQNEK.E    | 2            | K1C18_HUMAN          |
| P05783                                                                                       | 2             | 3.9242           | R.LLEDGEDFNLGDALDSSNSMQTIQK.T     | 1            | K1C18_HUMAN          |
| P05783                                                                                       | 3             | 5.1793           | R.RLLEDGEDFNLGDALDSSNSMQTIQK.T    | 1            | K1C18_HUMAN          |
| P05783                                                                                       | 2             | 3.8012           | R.SLGSVQAPSYGAR.P                 | 4            | K1C18_HUMAN          |
| P05783                                                                                       | 2             | 4.177            | R.TVQSLEIDLDSMR.N                 | 1            | K1C18_HUMAN          |
| P05783                                                                                       | 2             | 4.1954           | R.AQIFANTVDNAR.I                  | 3            | K1C18_HUMAN          |
| P05783                                                                                       | 1             | 2.5988           | R.LASYLDR.V                       | 2            | K1C18_HUMAN          |
| <b><i>Keratin, type I cytoskeletal 19 - Homo sapiens (Human)</i></b>                         |               |                  |                                   |              |                      |
| P08727                                                                                       | 2             | 3.8851           | R.ALEAANGELEVK.I                  | 2            | K1C19_HUMAN          |
| P08727                                                                                       | 2             | 3.8397           | R.SQYEVMAEQNR.K                   | 4            | K1C19_HUMAN          |
| P08727                                                                                       | 2             | 3.1588           | R.EVAGHTEQLQM#SR.S                | 1            | K1C19_HUMAN          |
| P08727                                                                                       | 2             | 3                | R.DKILGATIENSRI                   | 1            | K1C19_HUMAN          |

| <i>Accession No*</i> | <i>Charge</i> | <i>XC(Max)**</i> | <i>Peptide*</i>           | <i>TC***</i> | <i>Reference No*</i> |
|----------------------|---------------|------------------|---------------------------|--------------|----------------------|
| P08727               | 2             | 3.9841           | R.EVAGHTEQLQMSR.S         | 4            | K1C19_HUMAN          |
| P08727               | 2             | 2.7102           | R.GQVGGQVSVEVDSAPGTDLAK.I | 1            | K1C19_HUMAN          |
| P08727               | 2             | 5.0627           | R.QSSATSSFGLGGGSVR.F      | 3            | K1C19_HUMAN          |
| P08727               | 2             | 4.2182           | R.SLLEGQEDHYNNLSASK.V     | 2            | K1C19_HUMAN          |
| P08727               | 3             | 5.1913           | R.TEELNREVAGHTEQLQMSR.S   | 4            | K1C19_HUMAN          |
| P08727               | 3             | 5.327            | R.TEELNREVAGHTEQLQM#SR.S  | 2            | K1C19_HUMAN          |
| P08727               | 2             | 3.1455           | K.NHEEEISTLR.G            | 3            | K1C19_HUMAN          |
| P08727               | 3             | 4.2727           | R.DYSHYYTTIQDLRDK.I       | 1            | K1C19_HUMAN          |
| P08727               | 2             | 2.7463           | R.SQYEVMAEQNRK.D          | 1            | K1C19_HUMAN          |
| P08727               | 2             | 4.3847           | K.SRLEQEIATYR.S           | 2            | K1C19_HUMAN          |
| P08727               | 2             | 3.5255           | K.ILGATIENSR.I            | 2            | K1C19_HUMAN          |
| P08727               | 2             | 4.4561           | K.AALEDTLAETEAR.F         | 3            | K1C19_HUMAN          |
| P08727               | 2             | 3.6491           | R.SQYEVMAEQNRK.D          | 4            | K1C19_HUMAN          |
| P08727               | 2             | 2.9415           | K.DAEAWFTSR.T             | 1            | K1C19_HUMAN          |

***Keratin, type I cytoskeletal 9 - Homo sapiens (Human)***

|        |   |        |                                 |   |            |
|--------|---|--------|---------------------------------|---|------------|
| P35527 | 2 | 4.1739 | R.FSSSSGYGGGSSR.V               | 1 | K1C9_HUMAN |
| P35527 | 3 | 3.7939 | K.NYSPYYNTIDDLKDQIVDLTVGNK.T    | 1 | K1C9_HUMAN |
| P35527 | 2 | 3.1699 | K.STMQELNSR.L                   | 1 | K1C9_HUMAN |
| P35527 | 3 | 6.2062 | R.HGVQELEIELQSQLSKK.A           | 1 | K1C9_HUMAN |
| P35527 | 2 | 4.863  | R.GGSGGSYGGGSGGGYGGGSGSR.G      | 2 | K1C9_HUMAN |
| P35527 | 2 | 5.6363 | R.SGGGGGGGLGSGGSIR.S            | 6 | K1C9_HUMAN |
| P35527 | 3 | 7.0414 | R.GGSGGSHGGSGFGGESGGSYGGGEEASGS | 1 | K1C9_HUMAN |

***Keratin, type II cytoskeletal 1 - Homo sapiens (Human)***

|        |   |        |                             |   |            |
|--------|---|--------|-----------------------------|---|------------|
| P04264 | 2 | 3.085  | K.SLNNQFASFIDKVR.F          | 1 | K2C1_HUMAN |
| P04264 | 2 | 2.7316 | R.TLLEGEESR.M               | 1 | K2C1_HUMAN |
| P04264 | 2 | 3.7553 | K.WELLQQVDTSTR.T            | 2 | K2C1_HUMAN |
| P04264 | 2 | 3.3479 | K.YEELQITAGR.H              | 1 | K2C1_HUMAN |
| P04264 | 2 | 4.6401 | R.GGGGGYSGGSSYSGGGSYSGGGGGG | 1 | K2C1_HUMAN |
| P04264 | 2 | 4.4796 | K.SLNNQFASFIDK.V            | 5 | K2C1_HUMAN |
| P04264 | 3 | 4.0157 | R.LLRDYQELMNTK.L            | 2 | K2C1_HUMAN |
| P04264 | 2 | 3.6021 | R.SGGGFSSGSAGIINYQR.R       | 2 | K2C1_HUMAN |
| P04264 | 2 | 4.8771 | R.SLDLDSIAAEVK.A            | 4 | K2C1_HUMAN |
| P04264 | 2 | 3.1396 | K.DVDGAYM#TK.V              | 3 | K2C1_HUMAN |
| P04264 | 2 | 3.91   | K.QISNLQQSISDAEQR.G         | 2 | K2C1_HUMAN |
| P04264 | 2 | 2.8914 | K.DVDGAYMTK.V               | 1 | K2C1_HUMAN |
| P04264 | 3 | 5.2335 | K.NKLNDLEDALQQAKEDLAR.L     | 2 | K2C1_HUMAN |

| <i>Accession No*</i> | <i>Charge</i> | <i>XC(Max)**</i> | <i>Peptide*</i>       | <i>TC***</i> | <i>Reference No*</i> |
|----------------------|---------------|------------------|-----------------------|--------------|----------------------|
| P04264               | 2             | 5.0766           | K.NKLNDLEDALQQAK.E    | 2            | K2C1_HUMAN           |
| P04264               | 1             | 2.4029           | R.SLVNLGGSK.S         | 2            | K2C1_HUMAN           |
| P04264               | 2             | 3.7658           | R.TNAENEFVTIKK.D      | 2            | K2C1_HUMAN           |
| P04264               | 2             | 2.9059           | R.TNAENEFVTIK.K       | 3            | K2C1_HUMAN           |
| P04264               | 3             | 3.8442           | K.LNDLEDALQQAKEDLAR.L | 1            | K2C1_HUMAN           |
| P04264               | 3             | 4.4893           | R.THNLEPYFESFINNLR.R  | 2            | K2C1_HUMAN           |

***Keratin, type II cytoskeletal 2 epidermal - Homo sapiens (Human)***

|        |   |        |                     |   |            |
|--------|---|--------|---------------------|---|------------|
| P35908 | 2 | 3.9247 | R.GFSSGSASVSGGSR.R  | 2 | K22E_HUMAN |
| P35908 | 2 | 3.8807 | K.GGSISGGGYGSGGGK.H | 2 | K22E_HUMAN |
| P35908 | 2 | 3.7486 | K.VDLLNQEIEFLK.V    | 2 | K22E_HUMAN |

***Keratin, type II cytoskeletal 5 - Homo sapiens (Human)***

|        |   |        |                 |   |            |
|--------|---|--------|-----------------|---|------------|
| P13647 | 2 | 3.0303 | K.YEELQQTAGR.H  | 1 | K2C5_HUMAN |
| P13647 | 2 | 2.7477 | R.ISISTSGGSFR.N | 1 | K2C5_HUMAN |
| P13647 | 2 | 3.2208 | K.AQYEEIANR.S   | 2 | K2C5_HUMAN |

***Keratin, type II cytoskeletal 7 - Homo sapiens (Human)***

|        |   |        |                         |   |            |
|--------|---|--------|-------------------------|---|------------|
| P08729 | 2 | 3.4222 | R.LDADPSLQR.V           | 3 | K2C7_HUMAN |
| P08729 | 2 | 4.5348 | R.LPDIFEAQIAGLR.G       | 2 | K2C7_HUMAN |
| P08729 | 3 | 4.2644 | R.VRQEESEQIK.T          | 9 | K2C7_HUMAN |
| P08729 | 3 | 4.3546 | R.AKLEAAIAEAEERGELALK.D | 2 | K2C7_HUMAN |
| P08729 | 2 | 2.8851 | K.DVDAAYMSK.V           | 3 | K2C7_HUMAN |
| P08729 | 2 | 2.824  | K.WTLLQEQQ.S            | 1 | K2C7_HUMAN |

***Keratin, type II cytoskeletal 8 - Homo sapiens (Human)***

|        |   |        |                                |   |            |
|--------|---|--------|--------------------------------|---|------------|
| P05787 | 3 | 5.3107 | K.LKLEAELGNMQGLVEDFK.N         | 3 | K2C8_HUMAN |
| P05787 | 2 | 3.294  | R.SNM#DNM#FESYINNLR.R          | 2 | K2C8_HUMAN |
| P05787 | 3 | 3.9385 | R.QLYEEEIRELQSQISDTSVVLSDNSR.S | 1 | K2C8_HUMAN |
| P05787 | 2 | 2.848  | R.ELQSQISDTSVVLSDNSR.S         | 1 | K2C8_HUMAN |
| P05787 | 3 | 3.785  | K.LLEGEESRLESGM#QNMSIHTK.T     | 1 | K2C8_HUMAN |
| P05787 | 3 | 5.0955 | K.DVDEAYMKNKVELES.R            | 6 | K2C8_HUMAN |
| P05787 | 2 | 5.3023 | K.LEAELGNMQGLVEDFK.N           | 1 | K2C8_HUMAN |
| P05787 | 3 | 5.0039 | K.LKLEAELGNMQGLVEDFKNK.Y       | 1 | K2C8_HUMAN |
| P05787 | 3 | 4.3817 | K.DVDEAYM#NKVELES.R            | 2 | K2C8_HUMAN |
| P05787 | 2 | 2.8718 | R.LQAEIEGLK.G                  | 4 | K2C8_HUMAN |
| P05787 | 3 | 5.5213 | K.LLEGEESRLESGMQNM#SIHTK.T     | 3 | K2C8_HUMAN |
| P05787 | 2 | 3.9952 | K.LVSESSDVLPK.-                | 7 | K2C8_HUMAN |
| P05787 | 2 | 3.9712 | K.YEELQSLAGK.H                 | 4 | K2C8_HUMAN |

| <i>Accession No*</i> | <i>Charge</i> | <i>XC(Max)**</i> | <i>Peptide*</i>             | <i>TC***</i> | <i>Reference No*</i> |
|----------------------|---------------|------------------|-----------------------------|--------------|----------------------|
| P05787               | 2             | 5.777            | R.ASLEAAIADAEQRGELAIK.D     | 2            | K2C8_HUMAN           |
| P05787               | 2             | 4.546            | R.ASLEAAIADAEQR.G           | 4            | K2C8_HUMAN           |
| P05787               | 2             | 3.3926           | R.SNM#DNMFESYINNLR.R        | 3            | K2C8_HUMAN           |
| P05787               | 3             | 4.2409           | R.DGKLVSESSDVLPK.-          | 6            | K2C8_HUMAN           |
| P05787               | 2             | 3.3927           | R.TEMENEFVLIKK.D            | 4            | K2C8_HUMAN           |
| P05787               | 1             | 2.7352           | R.ISSSSFSR.V                | 2            | K2C8_HUMAN           |
| P05787               | 2             | 3.1627           | R.SLDM#DSIIAEVK.A           | 2            | K2C8_HUMAN           |
| P05787               | 2             | 3.701            | R.LQAEIEGLKGQR.A            | 4            | K2C8_HUMAN           |
| P05787               | 2             | 4.1731           | R.SLDMDSIIAEVK.A            | 4            | K2C8_HUMAN           |
| P05787               | 3             | 4.3266           | R.SNMNDMFESYINNLR.R         | 1            | K2C8_HUMAN           |
| P05787               | 2             | 3.2365           | R.SRAEAESM#YQIK.Y           | 1            | K2C8_HUMAN           |
| P05787               | 3             | 5.6243           | R.SRAEAESM#YQIKYEELQSLAGK.H | 1            | K2C8_HUMAN           |
| P05787               | 3             | 4.0636           | R.SRAEAESMYQIK.Y            | 7            | K2C8_HUMAN           |
| P05787               | 2             | 3.1249           | R.TEMENEFVLIK.K             | 2            | K2C8_HUMAN           |
| P05787               | 2             | 3.0275           | R.TEM#ENEFVLIKK.D           | 3            | K2C8_HUMAN           |
| P05787               | 2             | 4.5932           | R.LEGLTDEINFLR.Q            | 10           | K2C8_HUMAN           |

***Ketohexokinase - Homo sapiens (Human)***

|        |   |        |                  |   |           |
|--------|---|--------|------------------|---|-----------|
| P50053 | 2 | 3.4276 | K.HLGFQSAEEALR.G | 2 | KHK_HUMAN |
|--------|---|--------|------------------|---|-----------|

***KH domain-containing, RNA-binding, signal transduction-associated protein 1 - Homo sapiens (H***

|        |   |        |                          |   |             |
|--------|---|--------|--------------------------|---|-------------|
| Q07666 | 3 | 4.0529 | K.DSLDPSFTHAMQLLTAEIEK.I | 2 | SAM68_HUMAN |
| Q07666 | 2 | 3.126  | R.SGSM#DPSGAHPSVR.Q      | 1 | SAM68_HUMAN |
| Q07666 | 2 | 3.5862 | R.SGSMDPSGAHPSVR.Q       | 2 | SAM68_HUMAN |

***KIAA0683 - Homo sapiens (Human)***

|        |   |        |                      |   |              |
|--------|---|--------|----------------------|---|--------------|
| Q7LDV4 | 2 | 2.7677 | R.M#DILDVLTAAQELSR.P | 1 | Q7LDV4_HUMAN |
|--------|---|--------|----------------------|---|--------------|

***KIAA1430 - Homo sapiens (Human)***

|        |   |        |                  |   |              |
|--------|---|--------|------------------|---|--------------|
| Q8N6E7 | 2 | 3.2601 | K.STETQPSSTAPK.C | 1 | Q8N6E7_HUMAN |
|--------|---|--------|------------------|---|--------------|

***KIAA1549 protein - Homo sapiens (Human)***

|        |   |        |                       |   |              |
|--------|---|--------|-----------------------|---|--------------|
| Q9HCM3 | 2 | 3.6122 | R.VSPSDADSTVSEESSER.D | 2 | Q9HCM3_HUMAN |
|--------|---|--------|-----------------------|---|--------------|

***KIAA1727 protein - Homo sapiens (Human)***

|        |   |        |                      |   |              |
|--------|---|--------|----------------------|---|--------------|
| Q9C0D6 | 2 | 3.4897 | R.PESAEGPSANTEAPLK.A | 2 | Q9C0D6_HUMAN |
|--------|---|--------|----------------------|---|--------------|

***KIAA2012 protein - Homo sapiens (Human)***

|        |   |        |                    |   |              |
|--------|---|--------|--------------------|---|--------------|
| Q0VF49 | 2 | 2.8953 | R.AERAEM#RWLEVEK.K | 1 | Q0VF49_HUMAN |
|--------|---|--------|--------------------|---|--------------|

***KIDINS220 protein - Homo sapiens (Human)***



| <i>Accession No*</i>                                                      | <i>Charge</i> | <i>XC(Max)**</i> | <i>Peptide*</i>                   | <i>TC***</i> | <i>Reference No*</i> |
|---------------------------------------------------------------------------|---------------|------------------|-----------------------------------|--------------|----------------------|
| A1L4N4                                                                    | 2             | 2.7327           | R.SSLFQTDLK.L                     | 1            | A1L4N4_HUMAN         |
| A1L4N4                                                                    | 2             | 3.1333           | R.ANQNFDMEGIR.E                   | 1            | A1L4N4_HUMAN         |
| <b><i>Kin of IRRE-like protein 1 precursor - Homo sapiens (Human)</i></b> |               |                  |                                   |              |                      |
| Q96J84                                                                    | 2             | 5.0043           | R.DGTQQEGAVASTELLK.D              | 3            | KIRR1_HUMAN          |
| Q96J84                                                                    | 2             | 4.3456           | R.FSQEPADQTVVAGQR.A               | 3            | KIRR1_HUMAN          |
| <b><i>Kinectin - Homo sapiens (Human)</i></b>                             |               |                  |                                   |              |                      |
| Q86UP2                                                                    | 2             | 2.7116           | R.ELKDLLTELQK.K                   | 1            | KTN1_HUMAN           |
| Q86UP2                                                                    | 2             | 3.1088           | K.TVQDLKQEIK.A                    | 2            | KTN1_HUMAN           |
| Q86UP2                                                                    | 1             | 2.8128           | K.AQQLSITSK.V                     | 1            | KTN1_HUMAN           |
| Q86UP2                                                                    | 2             | 3.4266           | K.KLDDSYSEAVR.Q                   | 1            | KTN1_HUMAN           |
| Q86UP2                                                                    | 2             | 5.39             | K.ALKKEEIGNVQLEK.A                | 5            | KTN1_HUMAN           |
| <b><i>Kinesin heavy chain - Homo sapiens (Human)</i></b>                  |               |                  |                                   |              |                      |
| P33176                                                                    | 2             | 5.0387           | K.SAEIDSDDTGGSAQK.Q               | 3            | KINH_HUMAN           |
| P33176                                                                    | 2             | 3.3663           | K.SLTEYLQNVEQK.K                  | 1            | KINH_HUMAN           |
| <b><i>Kinesin light chain 2 - Homo sapiens (Human)</i></b>                |               |                  |                                   |              |                      |
| Q9H0B6                                                                    | 2             | 4.2126           | K.SVEEPTQPGGTGLSDSR.T             | 3            | KLC2_HUMAN           |
| <b><i>Kinesin light chain 4 - Homo sapiens (Human)</i></b>                |               |                  |                                   |              |                      |
| Q9NSK0                                                                    | 2             | 2.9542           | R.TSQEGPGDSVK.F                   | 1            | KLC4_HUMAN           |
| <b><i>Kinesin-like protein KIF13B - Homo sapiens (Human)</i></b>          |               |                  |                                   |              |                      |
| Q9NQT8                                                                    | 3             | 4.6429           | R.MEEAQPEMGPDLVQTM#GAPALK.I       | 1            | KI13B_HUMAN          |
| Q9NQT8                                                                    | 2             | 4.5918           | K.GRWESQQDVSQTTVSR.G              | 2            | KI13B_HUMAN          |
| Q9NQT8                                                                    | 2             | 3.3002           | R.EGEFVTGGAHK.T                   | 2            | KI13B_HUMAN          |
| Q9NQT8                                                                    | 2             | 4.8749           | R.MAANVENPASADSEAYIEK.Y           | 6            | KI13B_HUMAN          |
| Q9NQT8                                                                    | 2             | 3.844            | R.ERPDLEAPAGSPFR.V                | 5            | KI13B_HUMAN          |
| Q9NQT8                                                                    | 2             | 3.4118           | R.MEEAQPEM#GPDVLVQTMGAPALK.I      | 1            | KI13B_HUMAN          |
| Q9NQT8                                                                    | 2             | 3.1286           | R.IMVQSASPDIR.V                   | 2            | KI13B_HUMAN          |
| Q9NQT8                                                                    | 2             | 5.9345           | R.SATLSGSATNLASLTAALAK.A          | 1            | KI13B_HUMAN          |
| Q9NQT8                                                                    | 2             | 2.9873           | R.SVLAVENLLTLDR.L                 | 1            | KI13B_HUMAN          |
| Q9NQT8                                                                    | 2             | 4.8085           | R.M#AANVENPASADSEAYIEK.Y          | 4            | KI13B_HUMAN          |
| Q9NQT8                                                                    | 2             | 3.9412           | R.M#EEAQPEMGPDLVQTMGAPALK.I       | 3            | KI13B_HUMAN          |
| Q9NQT8                                                                    | 3             | 4.4943           | R.YVGPADFQEGTWVGVLDLPSGKNDGSIGGK. | 2            | KI13B_HUMAN          |
| Q9NQT8                                                                    | 3             | 5.4537           | R.GIAPAPALSVPQNNHSPDPGLSNLAASYLNP | 3            | KI13B_HUMAN          |
| Q9NQT8                                                                    | 2             | 3.8636           | R.WESQQDVSQTTVSR.G                | 1            | KI13B_HUMAN          |

Accession No\* Charge XC(Max)\*\* Peptide\* TC\*\*\* Reference No\*

***Kinesin-like protein KIF1C - Homo sapiens (Human)***

Q43896 2 2.7523 R.DVWDTVGEIEGGGAGSGGGSEEGAR.G 1 KIF1C\_HUMAN

***Kinesin-like protein KIF21A - Homo sapiens (Human)***

Q7Z4S6 2 2.7975 K.KLQAMNK.E 1 KI21A\_HUMAN

Q7Z4S6 2 3.3872 R.EKELSPPPGLPSK.I 2 KI21A\_HUMAN

Q7Z4S6 2 5.2475 R.DQVLQNLGVSVEYSEEK.A 1 KI21A\_HUMAN

Q7Z4S6 2 5.1396 K.LSSSDAPAQDGTSSAAVETDASR.T 3 KI21A\_HUMAN

***L antigen family member 3 - Homo sapiens (Human)***

Q14657 2 3.7957 R.DADADAGGGADGGDGR.G 2 LAGE3\_HUMAN

***Lactoylglutathione lyase - Homo sapiens (Human)***

Q04760 2 6.0886 K.GLAFIQDPDGYWIEILNPNK.M 7 LGUL\_HUMAN

Q04760 2 2.8531 K.IAWALSR.K 1 LGUL\_HUMAN

***Ladinin 1 - Homo sapiens (Human)***

Q96GD8 2 4.0129 R.GPWALEEEESLVGR.E 2 Q96GD8\_HUMAN

Q96GD8 3 4.3861 R.GPWALEEEESLVGREPEER.K 9 Q96GD8\_HUMAN

***Lamin-A/C - Homo sapiens (Human)***

P02545 2 5.0802 R.SVGGSGGGSGFDNLVTR.S 8 LMNA\_HUMAN

P02545 2 5.6081 K.ASASGSGAQVGGPISSGSSASSVTVTR.S 3 LMNA\_HUMAN

***Lamin-B receptor - Homo sapiens (Human)***

Q14739 2 3.46 R.KFADGEVVR.G 2 LBR\_HUMAN

***Lamin-B1 - Homo sapiens (Human)***

P20700 3 3.7583 R.EMAEIRDQMQQQLNDYEQLLDVK.L 1 LMNB1\_HUMAN

P20700 2 3.1738 K.NSQGEEVAQR.S 2 LMNB1\_HUMAN

***Lamin-B2 - Homo sapiens (Human)***

Q03252 2 3.9346 R.SEVELAAALSDDR.G 2 LMNB2\_HUMAN

Q03252 2 3.5425 R.M#RLESLSYQLSGLQK.Q 2 LMNB2\_HUMAN

Q03252 2 2.8661 R.QVLEGEIEIAYK.F 1 LMNB2\_HUMAN

Q03252 2 3.4616 R.RLVEVDSSR.Q 9 LMNB2\_HUMAN

Q03252 2 3.189 R.RVLDETAR.E 3 LMNB2\_HUMAN

Q03252 2 3.6236 R.TVLVNADGEEVAM#R.T 2 LMNB2\_HUMAN

Q03252 1 2.1674 R.VLDETAR.E 1 LMNB2\_HUMAN

Q03252 2 3.2651 K.ISEKEEVTR.E 2 LMNB2\_HUMAN

Q03252 3 3.9842 R.LYKLELEQTYQAK.L 1 LMNB2\_HUMAN

| <i>Accession No*</i> | <i>Charge</i> | <i>XC(Max)**</i> | <i>Peptide*</i>       | <i>TC***</i> | <i>Reference No*</i> |
|----------------------|---------------|------------------|-----------------------|--------------|----------------------|
| Q03252               | 2             | 3.8086           | R.TVLVNADGEEVAMR.T    | 2            | LMNB2_HUMAN          |
| Q03252               | 2             | 3.0047           | K.ALYESELADAR.R       | 2            | LMNB2_HUMAN          |
| Q03252               | 2             | 4.0666           | K.GQSSWGTGESFR.T      | 7            | LMNB2_HUMAN          |
| Q03252               | 2             | 2.9535           | R.AGGPATPLSPTR.L      | 2            | LMNB2_HUMAN          |
| Q03252               | 1             | 3.889            | K.MAQALEELR.S         | 6            | LMNB2_HUMAN          |
| Q03252               | 2             | 3.2188           | K.M#AQALEELR.S        | 1            | LMNB2_HUMAN          |
| Q03252               | 2             | 4.9742           | R.LESLSYQLSGLQK.Q     | 4            | LMNB2_HUMAN          |
| Q03252               | 2             | 3.8531           | R.ALELENDRLLLK.I      | 2            | LMNB2_HUMAN          |
| Q03252               | 2             | 2.9734           | R.DVMQQQLAEYQELLDVK.L | 1            | LMNB2_HUMAN          |
| Q03252               | 3             | 4.9957           | R.IRELEEMAGERDK.F     | 2            | LMNB2_HUMAN          |
| Q03252               | 2             | 4.3646           | R.GLESDVaelR.A        | 3            | LMNB2_HUMAN          |
| Q03252               | 2             | 2.7104           | R.ELEEAMAGERDK.F      | 2            | LMNB2_HUMAN          |
| Q03252               | 2             | 3.6802           | R.ATSSSSGSLSATGR.L    | 3            | LMNB2_HUMAN          |
| Q03252               | 2             | 4.6186           | K.LSSDQNDKAASAAR.E    | 4            | LMNB2_HUMAN          |

***Laminin subunit alpha-1 precursor - Homo sapiens (Human)***

|        |   |        |                            |   |             |
|--------|---|--------|----------------------------|---|-------------|
| P25391 | 3 | 5.2415 | K.AAEDLLSQIQENYQKPLEEVLK.E | 2 | LAMA1_HUMAN |
|--------|---|--------|----------------------------|---|-------------|

***Laminin subunit alpha-4 precursor - Homo sapiens (Human)***

|        |   |        |                           |   |             |
|--------|---|--------|---------------------------|---|-------------|
| Q16363 | 2 | 3.8986 | K.AESSSDEAVADTSR.R        | 3 | LAMA4_HUMAN |
| Q16363 | 2 | 5.4109 | R.TLFPVVLEQLDDYNAK.L      | 4 | LAMA4_HUMAN |
| Q16363 | 3 | 4.4827 | R.ELVDEEAEAYELLSQAESWQR.L | 2 | LAMA4_HUMAN |

***Laminin subunit alpha-5 precursor - Homo sapiens (Human)***

|        |   |        |                            |   |             |
|--------|---|--------|----------------------------|---|-------------|
| O15230 | 3 | 4.3251 | R.LLHSLDQAKEELER.L         | 2 | LAMA5_HUMAN |
| O15230 | 2 | 2.9628 | R.VRELIAQAR.G              | 1 | LAMA5_HUMAN |
| O15230 | 2 | 4.8465 | R.VQSLLQAMQENVER.W         | 3 | LAMA5_HUMAN |
| O15230 | 2 | 3.7791 | R.VQSLLQAM#QENVER.W        | 1 | LAMA5_HUMAN |
| O15230 | 3 | 4.2477 | R.VQEQLSSLWEENQALATQTR.D   | 1 | LAMA5_HUMAN |
| O15230 | 2 | 7.0058 | R.HETAQQLEVLQEQSTSLGQDAR.R | 2 | LAMA5_HUMAN |
| O15230 | 3 | 4.279  | R.NQERLEEALQR.K            | 7 | LAMA5_HUMAN |
| O15230 | 2 | 4.6221 | R.LGLVWAAALQGAR.T          | 5 | LAMA5_HUMAN |
| O15230 | 2 | 3.2632 | R.LGGQAVGTR.D              | 6 | LAMA5_HUMAN |
| O15230 | 3 | 4.8434 | R.LAQHEAGLM#DLR.E          | 2 | LAMA5_HUMAN |
| O15230 | 2 | 2.9278 | R.WQQQYEGLR.G              | 1 | LAMA5_HUMAN |
| O15230 | 2 | 3.1757 | R.GYAQMAMPVQPR.I           | 1 | LAMA5_HUMAN |
| O15230 | 1 | 2.3985 | K.TLLAAIR.A                | 1 | LAMA5_HUMAN |
| O15230 | 2 | 3.1435 | R.RLGGQAVGTR.D             | 4 | LAMA5_HUMAN |

| <i>Accession No*</i> | <i>Charge</i> | <i>XC(Max)**</i> | <i>Peptide*</i>                  | <i>TC***</i> | <i>Reference No*</i> |
|----------------------|---------------|------------------|----------------------------------|--------------|----------------------|
| O15230               | 2             | 2.7109           | R.LAASLDGAR.T                    | 1            | LAMA5_HUMAN          |
| O15230               | 2             | 4.3432           | K.AVAAEAQDTATR.V                 | 1            | LAMA5_HUMAN          |
| O15230               | 2             | 3.4348           | R.AGALLPAIHEQLR.G                | 2            | LAMA5_HUMAN          |
| O15230               | 2             | 3.8805           | R.AIEASNAYSRI                    | 6            | LAMA5_HUMAN          |
| O15230               | 2             | 5.3981           | R.DLADLAAYTALK.F                 | 3            | LAMA5_HUMAN          |
| O15230               | 2             | 5.8969           | R.DLGAPQAAAEELAAQR.L             | 13           | LAMA5_HUMAN          |
| O15230               | 2             | 4.5849           | R.DQASQLLAGTEATLGHAK.T           | 2            | LAMA5_HUMAN          |
| O15230               | 1             | 3.0177           | R.DTLASVFR.L                     | 4            | LAMA5_HUMAN          |
| O15230               | 2             | 3.1472           | R.GQLQLVEGNFR.H                  | 1            | LAMA5_HUMAN          |
| O15230               | 4             | 5.2837           | R.ILQAVQAAEDAAGQALQQADHTWATVVR.Q | 1            | LAMA5_HUMAN          |

***Laminin subunit beta-1 precursor - Homo sapiens (Human)***

|        |   |        |                                 |   |             |
|--------|---|--------|---------------------------------|---|-------------|
| P07942 | 2 | 3.0945 | R.IPSWTGAGFVR.V                 | 2 | LAMB1_HUMAN |
| P07942 | 2 | 2.7301 | R.DRVEDVMM#ER.E                 | 1 | LAMB1_HUMAN |
| P07942 | 2 | 3.4827 | K.MDKSNEELR.N                   | 4 | LAMB1_HUMAN |
| P07942 | 3 | 4.8561 | R.VESLSQVEVILQHSAAADIAR.A       | 6 | LAMB1_HUMAN |
| P07942 | 2 | 3.7782 | K.TLDGELDEKYK.K                 | 3 | LAMB1_HUMAN |
| P07942 | 1 | 3.2498 | K.TLLAQANSK.L                   | 6 | LAMB1_HUMAN |
| P07942 | 2 | 3.3898 | R.AEMLLEEAKR.A                  | 2 | LAMB1_HUMAN |
| P07942 | 2 | 3.2754 | R.DRVEDVMMER.E                  | 2 | LAMB1_HUMAN |
| P07942 | 1 | 2.4727 | R.GALDSITK.Y                    | 2 | LAMB1_HUMAN |
| P07942 | 2 | 3.8363 | R.KAEMLQNEAK.T                  | 6 | LAMB1_HUMAN |
| P07942 | 2 | 2.9611 | R.LLDELAKG.L                    | 2 | LAMB1_HUMAN |
| P07942 | 2 | 2.8713 | K.M#DKSNEELR.N                  | 1 | LAMB1_HUMAN |
| P07942 | 2 | 2.8334 | K.ISGVIGPYRETVDSEVER.K          | 1 | LAMB1_HUMAN |
| P07942 | 2 | 5.2871 | R.NFLTQDSADLDSIEAVANEVLK.M      | 6 | LAMB1_HUMAN |
| P07942 | 3 | 5.1685 | K.AM#DLDDQDVLSALAEVEQLSK.M      | 2 | LAMB1_HUMAN |
| P07942 | 2 | 3.0424 | K.KVENLIAK.K                    | 4 | LAMB1_HUMAN |
| P07942 | 2 | 3.601  | K.NIGNLFEEAEK.L                 | 3 | LAMB1_HUMAN |
| P07942 | 3 | 5.2249 | K.AMDLDQDVLSALAEVEQLSK.M        | 3 | LAMB1_HUMAN |
| P07942 | 2 | 3.6371 | K.DILAQSPAAEPLK.N               | 2 | LAMB1_HUMAN |
| P07942 | 2 | 2.8698 | K.DVTEM#M#AQVEVK.L              | 1 | LAMB1_HUMAN |
| P07942 | 2 | 5.0278 | K.EALEEAEKAQVAAEK.A             | 3 | LAMB1_HUMAN |
| P07942 | 4 | 4.7563 | K.ELDSLQTEAESLDNTVKELAEQLEFIK.N | 1 | LAMB1_HUMAN |
| P07942 | 2 | 2.958  | K.ISGVIGPYR.E                   | 1 | LAMB1_HUMAN |
| P07942 | 3 | 4.1321 | R.KVSEIKDILAQSPAAEPLK.N         | 1 | LAMB1_HUMAN |
| P07942 | 2 | 3.3541 | R.KAEM#LQNEAK.T                 | 5 | LAMB1_HUMAN |

Accession No\* Charge XC(Max)\*\* Peptide\* TC\*\*\* Reference No\*

**Laminin subunit gamma-1 precursor - Homo sapiens (Human)**

|        |   |        |                                      |   |             |
|--------|---|--------|--------------------------------------|---|-------------|
| P11047 | 2 | 3.1996 | K.AFDITYVR.L                         | 2 | LAMC1_HUMAN |
| P11047 | 2 | 3.3299 | R.TFAEVTDLDNEVNNM#LK.Q               | 1 | LAMC1_HUMAN |
| P11047 | 2 | 3.2295 | K.VSDLENEAK.K                        | 7 | LAMC1_HUMAN |
| P11047 | 2 | 5.3779 | K.TREAQQALGSAAADATEAK.N              | 2 | LAMC1_HUMAN |
| P11047 | 2 | 4.0904 | K.TEQQTADQLLAR.A                     | 1 | LAMC1_HUMAN |
| P11047 | 2 | 4.5395 | R.LSAEDLVLEGAGLR.V                   | 4 | LAMC1_HUMAN |
| P11047 | 2 | 4.5649 | K.DGFFGNPLAPNPADK.C                  | 4 | LAMC1_HUMAN |
| P11047 | 2 | 2.7995 | K.DVDQNLMDR.L                        | 2 | LAMC1_HUMAN |
| P11047 | 2 | 3.1548 | K.ALAEAAK.K                          | 1 | LAMC1_HUMAN |
| P11047 | 1 | 2.3102 | K.ALAEAAK.K                          | 3 | LAMC1_HUMAN |
| P11047 | 2 | 3.1789 | K.DVDQNLMDR.L                        | 4 | LAMC1_HUMAN |
| P11047 | 2 | 4.9034 | R.DTLQEANDILNNLK.D                   | 4 | LAMC1_HUMAN |
| P11047 | 3 | 5.0513 | R.VKLQELES LIANLGTGDEM#VTDQAFEDRLK.E | 2 | LAMC1_HUMAN |
| P11047 | 3 | 4.0585 | K.KQEAAIM#DYNRDIEEIMK.D              | 2 | LAMC1_HUMAN |
| P11047 | 2 | 4.9786 | R.TFAEVTDLDNEVNNMLK.Q                | 3 | LAMC1_HUMAN |
| P11047 | 3 | 4.5705 | K.LQELES LIANLGTGDEM#VTDQAFEDRLK.E   | 1 | LAMC1_HUMAN |
| P11047 | 1 | 2.2847 | R.LIEIASR.E                          | 1 | LAMC1_HUMAN |
| P11047 | 2 | 5.1038 | K.GKTEQQTADQLLAR.A                   | 7 | LAMC1_HUMAN |
| P11047 | 2 | 4.7964 | R.NTIEETGNLAEQAR.A                   | 4 | LAMC1_HUMAN |
| P11047 | 2 | 3.4456 | K.LKDYEDLREDMR.G                     | 1 | LAMC1_HUMAN |
| P11047 | 1 | 2.3293 | R.EGFVGNR.C                          | 1 | LAMC1_HUMAN |
| P11047 | 3 | 6.4177 | R.VKLQELES LIANLGTGDEM#VTDQAFEDR.L   | 3 | LAMC1_HUMAN |
| P11047 | 2 | 3.0052 | R.EAQDVKDVQNLMDR.L                   | 2 | LAMC1_HUMAN |
| P11047 | 2 | 4.057  | K.MEAENLEQLIDQK.L                    | 2 | LAMC1_HUMAN |
| P11047 | 2 | 4.2231 | R.SAGYLDDVTLASAR.P                   | 3 | LAMC1_HUMAN |
| P11047 | 2 | 4.0766 | R.LNTFGDEVFNDPK.V                    | 3 | LAMC1_HUMAN |
| P11047 | 3 | 4.0277 | R.HKQEADDIVR.V                       | 5 | LAMC1_HUMAN |
| P11047 | 2 | 5.0544 | R.EAQQALGSAAADATEAK.N                | 5 | LAMC1_HUMAN |
| P11047 | 2 | 3.4979 | K.SYYYAISDFAVGGR.C                   | 1 | LAMC1_HUMAN |

**La-related protein 1 - Homo sapiens (Human)**

|        |   |        |                                   |   |             |
|--------|---|--------|-----------------------------------|---|-------------|
| Q6PKG0 | 2 | 2.9415 | R.HSVVAGGGGGEGR.K                 | 1 | LARP1_HUMAN |
| Q6PKG0 | 2 | 2.908  | K.ETESAPGSPR.A                    | 1 | LARP1_HUMAN |
| Q6PKG0 | 3 | 8.3294 | R.ESPRPLQLPGAEGPAISDGEEGGGEPGAGGG | 3 | LARP1_HUMAN |
| Q6PKG0 | 3 | 4.617  | R.EQFDLTPPEPPVDPNQEVP GPPR.F      | 3 | LARP1_HUMAN |
| Q6PKG0 | 2 | 3.3741 | R.DFVEAPPPK.V                     | 3 | LARP1_HUMAN |

| <i>Accession No*</i>                                                                                    | <i>Charge</i> | <i>XC(Max)**</i> | <i>Peptide*</i>            | <i>TC***</i> | <i>Reference No*</i> |
|---------------------------------------------------------------------------------------------------------|---------------|------------------|----------------------------|--------------|----------------------|
| Q6PKG0                                                                                                  | 3             | 4.7472           | K.VGDFGDAINWPTPGEIAHK.S    | 2            | LARP1_HUMAN          |
| Q6PKG0                                                                                                  | 2             | 3.8088           | K.ILIVTQTPHYMR.R           | 1            | LARP1_HUMAN          |
| <b><i>La-related protein 4 - Homo sapiens (Human)</i></b>                                               |               |                  |                            |              |                      |
| Q71RC2                                                                                                  | 2             | 5.3233           | K.FDLLASNFPLPGSSSR.M       | 2            | LARP4_HUMAN          |
| Q71RC2                                                                                                  | 3             | 3.7245           | K.DGLNQTTIPVSPSTTKPSR.A    | 1            | LARP4_HUMAN          |
| Q71RC2                                                                                                  | 2             | 2.7229           | K.DLIEDSSVQK.D             | 1            | LARP4_HUMAN          |
| Q71RC2                                                                                                  | 2             | 3.2709           | R.MPGELVLENR.M             | 2            | LARP4_HUMAN          |
| <b><i>La-related protein 5 - Homo sapiens (Human)</i></b>                                               |               |                  |                            |              |                      |
| Q92615                                                                                                  | 2             | 2.7813           | K.VVAEPQTQR.V              | 1            | LARP5_HUMAN          |
| <b><i>Large proline-rich protein BAT3 - Homo sapiens (Human)</i></b>                                    |               |                  |                            |              |                      |
| P46379                                                                                                  | 2             | 3.4825           | K.TM#QGEGPQLLLSEAVSR.A     | 3            | BAT3_HUMAN           |
| P46379                                                                                                  | 2             | 4.127            | R.DLEAPEVQESYR.Q           | 2            | BAT3_HUMAN           |
| P46379                                                                                                  | 2             | 3.1462           | K.TMQGEGPQLLLSEAVSR.A      | 2            | BAT3_HUMAN           |
| <b><i>Lariat debranching enzyme - Homo sapiens (Human)</i></b>                                          |               |                  |                            |              |                      |
| Q9UK59                                                                                                  | 2             | 3.0435           | R.LSDEHEPEQR.K             | 1            | DBR1_HUMAN           |
| <b><i>Latent-transforming growth factor beta-binding protein 2 precursor - Homo sapiens (Human)</i></b> |               |                  |                            |              |                      |
| Q14767                                                                                                  | 2             | 4.1896           | K.QSTFTLPLSNQLASVNP SLVK.V | 1            | LTBP2_HUMAN          |
| Q14767                                                                                                  | 2             | 3.8534           | R.EQDAPVAGLQPVER.A         | 3            | LTBP2_HUMAN          |
| <b><i>Lck-interacting transmembrane adapter 1 - Homo sapiens (Human)</i></b>                            |               |                  |                            |              |                      |
| Q9H400                                                                                                  | 3             | 3.7229           | R.DITGPQAAPSAPFHQELPR.A    | 1            | LIME1_HUMAN          |
| <b><i>LEM domain-containing protein 2 - Homo sapiens (Human)</i></b>                                    |               |                  |                            |              |                      |
| Q8NC56                                                                                                  | 2             | 3.2735           | R.LREDAPLR.A               | 2            | LEMD2_HUMAN          |
| Q8NC56                                                                                                  | 2             | 2.8202           | R.GSSEEDARTPDR.A           | 1            | LEMD2_HUMAN          |
| <b><i>Lethal(2) giant larvae protein homolog 2 - Homo sapiens (Human)</i></b>                           |               |                  |                            |              |                      |
| Q6P1M3                                                                                                  | 3             | 4.1903           | R.NSGTQSDGEEKQPGLVM#ER.A   | 1            | L2GL2_HUMAN          |
| <b><i>Lethal(3)malignant brain tumor-like 3 protein - Homo sapiens (Human)</i></b>                      |               |                  |                            |              |                      |
| Q96JM7                                                                                                  | 2             | 2.808            | R.DVEEDNEEDPK.C            | 1            | LMBL3_HUMAN          |
| <b><i>Leucine zipper protein 1 - Homo sapiens (Human)</i></b>                                           |               |                  |                            |              |                      |
| Q86V48                                                                                                  | 3             | 3.8434           | K.HFESLEEELKK.M            | 1            | LUZP1_HUMAN          |
| Q86V48                                                                                                  | 3             | 5.0893           | R.TSLFENDKDAGMENESVK.S     | 1            | LUZP1_HUMAN          |
| Q86V48                                                                                                  | 2             | 2.9978           | K.KISSELEMLR.V             | 1            | LUZP1_HUMAN          |
| Q86V48                                                                                                  | 2             | 3.2751           | R.VGPSSGDAPEPSSR.R         | 3            | LUZP1_HUMAN          |

| <i>Accession No*</i> | <i>Charge</i> | <i>XC(Max)**</i> | <i>Peptide*</i>         | <i>TC***</i> | <i>Reference No*</i> |
|----------------------|---------------|------------------|-------------------------|--------------|----------------------|
| Q86V48               | 2             | 4.4158           | R.IEDGISSTLPSK.E        | 3            | LUZP1_HUMAN          |
| Q86V48               | 3             | 4.2464           | R.ADKASDTSSETVFGK.R     | 1            | LUZP1_HUMAN          |
| Q86V48               | 3             | 4.3108           | K.QKELENGEVEGEDAFLSSK.G | 1            | LUZP1_HUMAN          |
| Q86V48               | 2             | 2.7691           | R.SSTDFSELEQPR.S        | 1            | LUZP1_HUMAN          |
| Q86V48               | 2             | 3.8637           | K.LLASQLEEEK.L          | 2            | LUZP1_HUMAN          |
| Q86V48               | 2             | 3.6713           | K.NVESTNSNAYTQR.S       | 1            | LUZP1_HUMAN          |
| Q86V48               | 2             | 2.7798           | K.ISSELEMLR.V           | 1            | LUZP1_HUMAN          |
| Q86V48               | 2             | 3.4374           | K.IMGGSGTETTLEK.Q       | 2            | LUZP1_HUMAN          |
| Q86V48               | 2             | 3.7719           | K.EKLEEEENLTR.E         | 2            | LUZP1_HUMAN          |
| Q86V48               | 2             | 3.0292           | K.ASDTSSETVFGK.R        | 2            | LUZP1_HUMAN          |
| Q86V48               | 3             | 3.7768           | K.ASHM#GVSTDSGTQETK.K   | 1            | LUZP1_HUMAN          |

***Leucine zipper-EF-hand-containing transmembrane protein 1, mitochondrial precursor - Homo sa***

|        |   |        |                                |   |             |
|--------|---|--------|--------------------------------|---|-------------|
| O95202 | 3 | 4.2786 | K.TGEEKYVEESK.A                | 1 | LETM1_HUMAN |
| O95202 | 3 | 4.0289 | R.VVAAPQRPGTEPQPEMPDVLQSETLK.D | 1 | LETM1_HUMAN |
| O95202 | 3 | 3.9547 | K.LTSLAAALDENKDGKVNIDDLVK.V    | 1 | LETM1_HUMAN |
| O95202 | 2 | 3.2319 | K.AEKEVAEVKS.-                 | 3 | LETM1_HUMAN |
| O95202 | 3 | 6.6864 | R.VQQMIGQIDGLISQLEMDQQAGK.L    | 2 | LETM1_HUMAN |
| O95202 | 3 | 6.8554 | R.VQQMIGQIDGLISQLEM#DQQAGK.L   | 2 | LETM1_HUMAN |
| O95202 | 2 | 5.018  | K.VAEVEGEQVDNK.A               | 4 | LETM1_HUMAN |
| O95202 | 2 | 3.4221 | R.SEVAKDFEPER.V                | 2 | LETM1_HUMAN |

***Leucine-rich alpha-2-glycoprotein precursor - Homo sapiens (Human)***

|        |   |        |                       |   |            |
|--------|---|--------|-----------------------|---|------------|
| P02750 | 2 | 2.7916 | R.TLDLGENQLETLPDLLR.G | 1 | A2GL_HUMAN |
| P02750 | 2 | 3.333  | R.VAAGAFQGLR.Q        | 3 | A2GL_HUMAN |

***Leucine-rich repeat and calponin homology domain-containing protein 3 precursor - Homo sapien***

|        |   |        |                      |   |             |
|--------|---|--------|----------------------|---|-------------|
| Q96I18 | 2 | 2.8068 | R.EAQLAALQYEEKIR.T   | 1 | LRCH3_HUMAN |
| Q96I18 | 2 | 3.7341 | R.WSGNEPTDEFSDLPLR.V | 1 | LRCH3_HUMAN |

***Leucine-rich repeat flightless-interacting protein 1 - Homo sapiens (Human)***

|        |   |        |                          |   |             |
|--------|---|--------|--------------------------|---|-------------|
| Q32MZ4 | 2 | 3.0929 | K.ELTYQNTDLSEIKEEQVK.S   | 1 | LRRF1_HUMAN |
| Q32MZ4 | 2 | 5.0032 | R.KSAVEAQNEVTENPK.Q      | 2 | LRRF1_HUMAN |
| Q32MZ4 | 2 | 4.2692 | R.NM#PGLSAATLASLGGTSSR.R | 2 | LRRF1_HUMAN |
| Q32MZ4 | 2 | 4.1237 | R.NMPGLSAATLASLGGTSSR.R  | 2 | LRRF1_HUMAN |
| Q32MZ4 | 2 | 3.2646 | K.IAAESSENVDCPENPK.I     | 1 | LRRF1_HUMAN |
| Q32MZ4 | 2 | 4.8243 | R.AGGEELDEGVAKDNAK.I     | 5 | LRRF1_HUMAN |
| Q32MZ4 | 3 | 5.1146 | K.HAHSILQFQFAEVK.E       | 4 | LRRF1_HUMAN |
| Q32MZ4 | 2 | 3.3206 | K.DSLAEVEEK.Y            | 1 | LRRF1_HUMAN |

| <i>Accession No*</i> | <i>Charge</i> | <i>XC(Max)**</i> | <i>Peptide*</i>                   | <i>TC***</i> | <i>Reference No*</i> |
|----------------------|---------------|------------------|-----------------------------------|--------------|----------------------|
| Q32MZ4               | 3             | 4.8329           | R.ASEVEVKNEIVANVGKR.E             | 2            | LRRF1_HUMAN          |
| Q32MZ4               | 3             | 5.6884           | K.KELTYQNTDLSEIKEEEQVK.S          | 2            | LRRF1_HUMAN          |
| Q32MZ4               | 2             | 2.7682           | R.ASEVEVK.N                       | 1            | LRRF1_HUMAN          |
| Q32MZ4               | 2             | 4.0435           | K.SAVEAQNEVTENPK.Q                | 2            | LRRF1_HUMAN          |
| Q32MZ4               | 2             | 3.3155           | K.SDQQGEALDSSQK.K                 | 1            | LRRF1_HUMAN          |
| Q32MZ4               | 2             | 3.0746           | K.TNFMVQVDTLK.D                   | 2            | LRRF1_HUMAN          |
| Q32MZ4               | 2             | 4.3974           | R.AGGEELDEGVAK.D                  | 5            | LRRF1_HUMAN          |
| Q32MZ4               | 3             | 7.785            | K.IKLDGKLDQEGDDVQTAEEVLADGDTLDFED | 1            | LRRF1_HUMAN          |
| Q32MZ4               | 2             | 4.3238           | K.IDGATQSSPAEPK.S                 | 10           | LRRF1_HUMAN          |
| Q32MZ4               | 3             | 7.966            | K.LDGKLDQEGDDVQTAEEVLADGDTLDFEDDT | 1            | LRRF1_HUMAN          |

***Leucine-rich repeat flightless-interacting protein 2 - Homo sapiens (Human)***

|        |   |        |                         |   |             |
|--------|---|--------|-------------------------|---|-------------|
| Q9Y608 | 3 | 3.785  | K.LAGEKEELLSQIRK.L      | 1 | LRRF2_HUMAN |
| Q9Y608 | 3 | 3.7612 | K.TAAENAEKVEDELKAEK.R   | 1 | LRRF2_HUMAN |
| Q9Y608 | 2 | 5.1782 | K.AEQDITTLEQSISR.L      | 7 | LRRF2_HUMAN |
| Q9Y608 | 2 | 3.9124 | K.DRFSAEDEALSNIAR.E     | 3 | LRRF2_HUMAN |
| Q9Y608 | 2 | 4.4587 | K.LAGEKEELLSQIR.K       | 2 | LRRF2_HUMAN |
| Q9Y608 | 3 | 3.8628 | K.LKLQLEEER.Q           | 1 | LRRF2_HUMAN |
| Q9Y608 | 2 | 3.431  | R.FSAEDEALSNIAR.E       | 2 | LRRF2_HUMAN |
| Q9Y608 | 2 | 3.9063 | R.NSASATTPLSGNSSR.R     | 2 | LRRF2_HUMAN |
| Q9Y608 | 3 | 5.7302 | R.TALDKIEEMEMTNSHLAK.R  | 5 | LRRF2_HUMAN |
| Q9Y608 | 3 | 4.7823 | R.TALDKIEEMEM#TNSHLAK.R | 3 | LRRF2_HUMAN |

***Leucine-rich repeat-containing protein 1 - Homo sapiens (Human)***

|        |   |        |                    |   |             |
|--------|---|--------|--------------------|---|-------------|
| Q9BTT6 | 2 | 4.4239 | R.FVEDEKDEEDNETR.T | 2 | LRRF1_HUMAN |
|--------|---|--------|--------------------|---|-------------|

***Leucine-rich repeat-containing protein 59 - Homo sapiens (Human)***

|        |   |        |                                   |   |             |
|--------|---|--------|-----------------------------------|---|-------------|
| Q96AG4 | 3 | 5.4738 | R.DKLDGNELDLSLSDLNEVPVKELAAALPK.A | 3 | LRC59_HUMAN |
| Q96AG4 | 3 | 3.9657 | R.DKLDGNELDLSLSDLNEVPVK.E         | 1 | LRC59_HUMAN |
| Q96AG4 | 3 | 4.8087 | K.LDGNELDLSLSDLNEVPVKELAAALPK.A   | 2 | LRC59_HUMAN |

***Leucyl-cystinyl aminopeptidase - Homo sapiens (Human)***

|        |   |        |                            |   |            |
|--------|---|--------|----------------------------|---|------------|
| Q9UIQ6 | 3 | 5.1329 | R.GLGEHEM#EEDEEDYESSAK.L   | 1 | LCAP_HUMAN |
| Q9UIQ6 | 3 | 4.0771 | R.C*VQEALEVIQLNIQWMEKNLK.S | 1 | LCAP_HUMAN |
| Q9UIQ6 | 3 | 4.6226 | R.GLGEHEMEEDEEDYESSAK.L    | 4 | LCAP_HUMAN |
| Q9UIQ6 | 2 | 3.2578 | K.YFAATQFEPLAAR.S          | 1 | LCAP_HUMAN |

***Leukocyte receptor cluster member 1 - Homo sapiens (Human)***

|        |   |        |               |   |             |
|--------|---|--------|---------------|---|-------------|
| Q96BZ8 | 2 | 3.1495 | R.SRAEALLAR.V | 3 | LENG1_HUMAN |
|--------|---|--------|---------------|---|-------------|



Accession No\* Charge XC(Max)\*\* Peptide\* TC\*\*\* Reference No\*

***LIM and calponin homology domains-containing protein 1 - Homo sapiens (Human)***

|        |   |        |                          |   |             |
|--------|---|--------|--------------------------|---|-------------|
| Q9UPQ0 | 2 | 3.0163 | K.WQQEQER.L              | 1 | LIMC1_HUMAN |
| Q9UPQ0 | 2 | 4.845  | K.GSLTEGALAHSGNPVSK.G    | 2 | LIMC1_HUMAN |
| Q9UPQ0 | 2 | 3.7901 | K.KPNSVPQELAATTEK.T      | 2 | LIMC1_HUMAN |
| Q9UPQ0 | 2 | 3.4221 | K.LLAGEDGTSER.R          | 2 | LIMC1_HUMAN |
| Q9UPQ0 | 2 | 3.1419 | K.SFQGDDSDLLK.T          | 1 | LIMC1_HUMAN |
| Q9UPQ0 | 2 | 4.3297 | K.SPEPEATLTFPFLDK.M      | 2 | LIMC1_HUMAN |
| Q9UPQ0 | 2 | 3.6645 | R.SQEEAEGILQQYIER.F      | 2 | LIMC1_HUMAN |
| Q9UPQ0 | 3 | 5.0482 | R.KGNIELASSEPQHFTTTVTR.C | 2 | LIMC1_HUMAN |
| Q9UPQ0 | 2 | 3.709  | R.FTISEAVLER.L           | 2 | LIMC1_HUMAN |
| Q9UPQ0 | 2 | 3.1137 | K.SNQTAYVPAPLR.K         | 2 | LIMC1_HUMAN |

***LIM and SH3 domain protein 1 - Homo sapiens (Human)***

|        |   |        |                      |    |             |
|--------|---|--------|----------------------|----|-------------|
| Q14847 | 3 | 4.7393 | K.GKGFVSVVADTPELQR.I | 5  | LASP1_HUMAN |
| Q14847 | 1 | 2.2516 | K.MTLNMK.N           | 2  | LASP1_HUMAN |
| Q14847 | 2 | 2.8345 | K.QQSELQSQVR.Y       | 2  | LASP1_HUMAN |
| Q14847 | 2 | 3.1342 | R.YKEEFEKNK.G        | 1  | LASP1_HUMAN |
| Q14847 | 2 | 4.0227 | K.QSFTM#VADTPENLR.L  | 3  | LASP1_HUMAN |
| Q14847 | 2 | 3.8574 | K.KTQDQISNIK.Y       | 8  | LASP1_HUMAN |
| Q14847 | 2 | 4.2041 | K.GFSVSVVADTPELQR.I  | 5  | LASP1_HUMAN |
| Q14847 | 1 | 2.7474 | R.YKEEFEK.N          | 4  | LASP1_HUMAN |
| Q14847 | 2 | 5.2846 | K.TQDQISNIKYHEEFK.S  | 3  | LASP1_HUMAN |
| Q14847 | 3 | 4.932  | R.LKQQSELQSQVR.Y     | 15 | LASP1_HUMAN |
| Q14847 | 2 | 3.4631 | K.TQDQISNIK.Y        | 5  | LASP1_HUMAN |
| Q14847 | 2 | 4.5734 | K.QSFTMVADTPENLR.L   | 4  | LASP1_HUMAN |

***LIM domain 7 - Homo sapiens (Human)***

|        |   |       |                |   |              |
|--------|---|-------|----------------|---|--------------|
| Q5JV86 | 2 | 3.193 | K.YNGDVEDIKR.T | 1 | Q5JV86_HUMAN |
|--------|---|-------|----------------|---|--------------|

***LIM domain and actin-binding protein 1 - Homo sapiens (Human)***

|        |   |      |                    |   |             |
|--------|---|------|--------------------|---|-------------|
| Q9UHB6 | 2 | 3.76 | R.STPAEDDSRDSQVK.S | 2 | LIMA1_HUMAN |
|--------|---|------|--------------------|---|-------------|

***LIM domain only protein 7 - Homo sapiens (Human)***

|        |   |        |                     |   |            |
|--------|---|--------|---------------------|---|------------|
| Q8WWI1 | 2 | 4.5407 | K.TSTTGVAATTSPTPR.S | 1 | LMO7_HUMAN |
| Q8WWI1 | 2 | 2.9161 | R.STTELDYDSTNK.N    | 1 | LMO7_HUMAN |
| Q8WWI1 | 2 | 2.9832 | R.GESLDNLDSPR.S     | 2 | LMO7_HUMAN |
| Q8WWI1 | 2 | 2.8227 | K.YNGDIEDIKR.T      | 1 | LMO7_HUMAN |

***LIM domain-containing protein 1 - Homo sapiens (Human)***

| <i>Accession No*</i>                                                                             | <i>Charge</i> | <i>XC(Max)**</i> | <i>Peptide*</i>                    | <i>TC***</i> | <i>Reference No*</i> |
|--------------------------------------------------------------------------------------------------|---------------|------------------|------------------------------------|--------------|----------------------|
| Q9UGP4                                                                                           | 2             | 3.4977           | K.FIEDLNMYEASK.D                   | 1            | LIMD1_HUMAN          |
| Q9UGP4                                                                                           | 2             | 3.2147           | K.FIEDLNM#YEASK.D                  | 2            | LIMD1_HUMAN          |
| Q9UGP4                                                                                           | 2             | 4.1281           | R.SSEGLGGQNSGIGGR.S                | 2            | LIMD1_HUMAN          |
| <b><i>LIM-nebulette - Homo sapiens (Human)</i></b>                                               |               |                  |                                    |              |                      |
| Q70I54                                                                                           | 2             | 3.3617           | K.QSFTTVADTPENLR.L                 | 1            | Q70I54_HUMAN         |
| Q70I54                                                                                           | 2             | 3.1529           | K.RTQEIQISNVK.Y                    | 2            | Q70I54_HUMAN         |
| Q70I54                                                                                           | 1             | 2.4096           | R.DFEESK.G                         | 4            | Q70I54_HUMAN         |
| Q70I54                                                                                           | 2             | 3.0543           | R.TQEIQISNVK.Y                     | 1            | Q70I54_HUMAN         |
| <b><i>Lipin-2 - Homo sapiens (Human)</i></b>                                                     |               |                  |                                    |              |                      |
| Q92539                                                                                           | 4             | 5.6107           | R.SQHQPDDIYLDLKGLEPEVAALYFPK.S     | 1            | LPIN2_HUMAN          |
| Q92539                                                                                           | 4             | 4.7149           | R.ALGTQMSDPTSVAELEPPLESTQISSMLDADH | 1            | LPIN2_HUMAN          |
| <b><i>Lipolysis-stimulated lipoprotein receptor - Homo sapiens (Human)</i></b>                   |               |                  |                                    |              |                      |
| Q86X29                                                                                           | 2             | 2.8485           | R.IQASQQDDSM#R.V                   | 1            | LSR_HUMAN            |
| Q86X29                                                                                           | 2             | 4.3081           | R.SSSAGGQGSYVPLLR.D                | 5            | LSR_HUMAN            |
| Q86X29                                                                                           | 2             | 3.4786           | R.IQASQQDDSMR.V                    | 2            | LSR_HUMAN            |
| <b><i>Lipoma-preferred partner - Homo sapiens (Human)</i></b>                                    |               |                  |                                    |              |                      |
| Q93052                                                                                           | 2             | 3.0829           | K.FAPVVAPKPK.Y                     | 1            | LPP_HUMAN            |
| Q93052                                                                                           | 2             | 4.832            | R.METTHSFGNPSISVSTQQPPK.K          | 6            | LPP_HUMAN            |
| Q93052                                                                                           | 3             | 4.9803           | R.M#ETTHSFGNPSISVSTQQPPK.F         | 3            | LPP_HUMAN            |
| Q93052                                                                                           | 3             | 6.5063           | R.METTHSFGNPSISVSTQQPPK.F          | 5            | LPP_HUMAN            |
| Q93052                                                                                           | 2             | 3.3905           | R.MVIPNQPLTATK.K                   | 6            | LPP_HUMAN            |
| Q93052                                                                                           | 2             | 2.7268           | R.M#VIPNQPLTATK.K                  | 1            | LPP_HUMAN            |
| Q93052                                                                                           | 3             | 5.0575           | K.REPGYTTPGAGNQNPMPVTPGPK.K        | 2            | LPP_HUMAN            |
| Q93052                                                                                           | 3             | 4.1259           | K.KFAPVVAPKPK.Y                    | 4            | LPP_HUMAN            |
| Q93052                                                                                           | 2             | 3.1256           | K.KFAPVVAPK.P                      | 4            | LPP_HUMAN            |
| Q93052                                                                                           | 1             | 2.1133           | K.FAPVVAPK.P                       | 1            | LPP_HUMAN            |
| Q93052                                                                                           | 2             | 3.4252           | R.EPGYTTPGAGNQNPMPVTPGPK.K         | 2            | LPP_HUMAN            |
| Q93052                                                                                           | 2             | 4.1975           | R.YYEGYYAAGPGYGGR.N                | 8            | LPP_HUMAN            |
| <b><i>Lipopolysaccharide-responsive and beige-like anchor protein - Homo sapiens (Human)</i></b> |               |                  |                                    |              |                      |
| P50851                                                                                           | 2             | 5.0189           | R.DINVSVGSQQPDTK.D                 | 3            | LRBA_HUMAN           |
| P50851                                                                                           | 2             | 2.9524           | K.ASPNVEAPQPHR.H                   | 1            | LRBA_HUMAN           |
| <b><i>Liprin-alpha-1 - Homo sapiens (Human)</i></b>                                              |               |                  |                                    |              |                      |
| Q13136                                                                                           | 2             | 3.9941           | R.SSDGSLSHEDLAK.V                  | 1            | LIPA1_HUMAN          |
| Q13136                                                                                           | 3             | 3.7051           | R.LIQEEKENTEQRAEEIESR.V            | 1            | LIPA1_HUMAN          |

| <i>Accession No*</i>                                                 | <i>Charge</i> | <i>XC(Max)**</i> | <i>Peptide*</i>                    | <i>TC***</i> | <i>Reference No*</i> |
|----------------------------------------------------------------------|---------------|------------------|------------------------------------|--------------|----------------------|
| Q13136                                                               | 2             | 3.1985           | K.VQTLNEQDWER.A                    | 2            | LIPA1_HUMAN          |
| Q13136                                                               | 3             | 4.1943           | R.LSDTVDKLLSESNR.L                 | 2            | LIPA1_HUMAN          |
| Q13136                                                               | 3             | 3.7759           | R.QMEAQLEEKQELQR.A                 | 1            | LIPA1_HUMAN          |
| Q13136                                                               | 2             | 3.9949           | R.QAQSPAGVSSEVEVLK.A               | 1            | LIPA1_HUMAN          |
| <b><i>Liprin-beta-1 - Homo sapiens (Human)</i></b>                   |               |                  |                                    |              |                      |
| Q86W92                                                               | 3             | 7.0673           | R.LYEEDDLDRLEQM#EDSEGTVR.Q         | 6            | LIPB1_HUMAN          |
| Q86W92                                                               | 2             | 3.3701           | R.SPSASITDEDSNV.-                  | 1            | LIPB1_HUMAN          |
| Q86W92                                                               | 3             | 3.7081           | R.TSLETQKLDLM#AEISNLK.L            | 1            | LIPB1_HUMAN          |
| Q86W92                                                               | 2             | 2.7641           | R.NSPFQIPPPSPDSK.K                 | 2            | LIPB1_HUMAN          |
| Q86W92                                                               | 3             | 6.4866           | R.LYEEDDLDRLEQMEDSEGTVR.Q          | 5            | LIPB1_HUMAN          |
| Q86W92                                                               | 2             | 2.9825           | K.AVESLM#AANEKDR.K                 | 1            | LIPB1_HUMAN          |
| Q86W92                                                               | 2             | 3.1379           | R.DTEGLIQEINDLR.L                  | 2            | LIPB1_HUMAN          |
| Q86W92                                                               | 2             | 2.7511           | R.ALHLVEDLR.G                      | 1            | LIPB1_HUMAN          |
| Q86W92                                                               | 3             | 3.785            | K.KAVESLMAANEKDR.K                 | 1            | LIPB1_HUMAN          |
| Q86W92                                                               | 2             | 4.306            | K.AVESLMAANEKDR.K                  | 3            | LIPB1_HUMAN          |
| Q86W92                                                               | 2             | 3.2034           | K.ETSDGKETIQK.T                    | 3            | LIPB1_HUMAN          |
| Q86W92                                                               | 2             | 3.6384           | R.GLLEMMETDEKEGLR.C                | 2            | LIPB1_HUMAN          |
| <b><i>Liprin-beta-2 - Homo sapiens (Human)</i></b>                   |               |                  |                                    |              |                      |
| Q8ND30                                                               | 2             | 4.4532           | K.LNAAEEM#LQQELLSR.T               | 1            | LIPB2_HUMAN          |
| Q8ND30                                                               | 2             | 3.0548           | K.LNAAEEMLQQELLSR.T                | 1            | LIPB2_HUMAN          |
| Q8ND30                                                               | 3             | 6.1917           | R.LRDTESGWDDTAVVNDLSSSTSSGTESGPQSP | 2            | LIPB2_HUMAN          |
| Q8ND30                                                               | 2             | 3.921            | K.DSPFLAEHKYPTLPGK.L               | 2            | LIPB2_HUMAN          |
| Q8ND30                                                               | 2             | 3.4957           | R.TLSINEEPEGGFSK.W                 | 2            | LIPB2_HUMAN          |
| Q8ND30                                                               | 3             | 4.3459           | K.AEVAQLQEVALKDAEIER.L             | 2            | LIPB2_HUMAN          |
| <b><i>L-lactate dehydrogenase A chain - Homo sapiens (Human)</i></b> |               |                  |                                    |              |                      |
| P00338                                                               | 2             | 3.8096           | K.VTLTSEEEAR.L                     | 1            | LDHA_HUMAN           |
| <b><i>L-lactate dehydrogenase B chain - Homo sapiens (Human)</i></b> |               |                  |                                    |              |                      |
| P07195                                                               | 2             | 2.7232           | K.LIAPVAEEEEATVPNNK.I              | 1            | LDHB_HUMAN           |
| P07195                                                               | 2             | 3.3319           | K.MVVESAYEVIK.L                    | 2            | LDHB_HUMAN           |
| P07195                                                               | 2             | 4.7428           | K.IVADKDYSVTANSK.I                 | 4            | LDHB_HUMAN           |
| P07195                                                               | 2             | 3.8313           | K.LKDDEVAQLK.K                     | 2            | LDHB_HUMAN           |
| P07195                                                               | 2             | 3.7221           | K.SADTLWDIQK.D                     | 3            | LDHB_HUMAN           |
| P07195                                                               | 2             | 3.7722           | K.LKDDEVAQLKK.S                    | 2            | LDHB_HUMAN           |
| <b><i>LOC113230 protein - Homo sapiens (Human)</i></b>               |               |                  |                                    |              |                      |

| <i>Accession No*</i>                                                                              | <i>Charge</i> | <i>XC(Max)**</i> | <i>Peptide*</i>                   | <i>TC***</i> | <i>Reference No*</i> |
|---------------------------------------------------------------------------------------------------|---------------|------------------|-----------------------------------|--------------|----------------------|
| Q96FF7                                                                                            | 3             | 4.2035           | R.VRPVLNLPGPGPALPR.A              | 2            | Q96FF7_HUMAN         |
| Q96FF7                                                                                            | 2             | 4.3643           | R.SVYGTAEFKEPTPSLTASR.G           | 2            | Q96FF7_HUMAN         |
| Q96FF7                                                                                            | 2             | 3.1285           | R.SPPQPLGELK.R                    | 1            | Q96FF7_HUMAN         |
| Q96FF7                                                                                            | 2             | 5.4602           | R.FFEAAAGSGSSAGAGDGAGPQR.L        | 6            | Q96FF7_HUMAN         |
| Q96FF7                                                                                            | 2             | 5.1063           | R.VLGSAPPPFTPSLLEQEV.R.A          | 3            | Q96FF7_HUMAN         |
| <b><i>LOC387763 protein - Homo sapiens (Human)</i></b>                                            |               |                  |                                   |              |                      |
| Q7Z7L8                                                                                            | 2             | 3.3024           | R.RSTQSLSLQR.E                    | 2            | Q7Z7L8_HUMAN         |
| Q7Z7L8                                                                                            | 2             | 2.7002           | K.LRNSLDSSDSAL.-                  | 1            | Q7Z7L8_HUMAN         |
| Q7Z7L8                                                                                            | 3             | 4.2124           | R.GAPAQRPPSESPGAPPPGADAGGAM#AAK.P | 1            | Q7Z7L8_HUMAN         |
| Q7Z7L8                                                                                            | 3             | 4.14             | R.FKTQPVTFDEIQEVEEEGVSPMEEK.A     | 1            | Q7Z7L8_HUMAN         |
| <b><i>LOC389203 protein - Homo sapiens (Human)</i></b>                                            |               |                  |                                   |              |                      |
| Q8N5G0                                                                                            | 2             | 3.724            | R.AGIVQEDVQPPGLK.V                | 2            | Q8N5G0_HUMAN         |
| <b><i>LOC87769 protein - Homo sapiens (Human)</i></b>                                             |               |                  |                                   |              |                      |
| Q9BVM4                                                                                            | 2             | 3.1147           | R.LVEGEVYAVDER.M                  | 1            | Q9BVM4_HUMAN         |
| <b><i>Long-chain-fatty-acid--CoA ligase 1 - Homo sapiens (Human)</i></b>                          |               |                  |                                   |              |                      |
| P33121                                                                                            | 2             | 2.9214           | R.SQIDDLYSTIKV.-                  | 1            | ACSL1_HUMAN          |
| <b><i>Loss of heterozygosity 12 chromosomal region 1 protein - Homo sapiens (Human)</i></b>       |               |                  |                                   |              |                      |
| Q969J3                                                                                            | 2             | 3.0475           | K.LQEIPTFQPLLK.G                  | 1            | Q969J3_HUMAN         |
| <b><i>Low-density lipoprotein receptor-related protein 1 precursor - Homo sapiens (Human)</i></b> |               |                  |                                   |              |                      |
| Q07954                                                                                            | 2             | 4.3001           | K.AVTDEEPFLIFANR.Y                | 3            | LRP1_HUMAN           |
| <b><i>Low-density lipoprotein receptor-related protein 2 precursor - Homo sapiens (Human)</i></b> |               |                  |                                   |              |                      |
| P98164                                                                                            | 2             | 5.126            | R.RDPTPTYSATEDTFK.D               | 1            | LRP2_HUMAN           |
| P98164                                                                                            | 2             | 3.6057           | K.QTTNFENPIYAQM#ENEQK.E           | 2            | LRP2_HUMAN           |
| P98164                                                                                            | 3             | 3.8741           | K.NYGSPINPSEIVPETNPTSPAADGTQVTK.W | 2            | LRP2_HUMAN           |
| P98164                                                                                            | 2             | 3.8673           | R.DPTPTYSATEDTFK.D                | 11           | LRP2_HUMAN           |
| P98164                                                                                            | 2             | 3.4104           | R.SMAM#SEDFVMEM#GK.Q              | 1            | LRP2_HUMAN           |
| P98164                                                                                            | 2             | 4.1959           | K.DTANLVKEDSEV.-                  | 6            | LRP2_HUMAN           |
| P98164                                                                                            | 3             | 4.1738           | R.SLHLDPENHSPPFQTINVER.T          | 2            | LRP2_HUMAN           |
| P98164                                                                                            | 2             | 2.9651           | R.SMAMSEDFVM#EMGK.Q               | 1            | LRP2_HUMAN           |
| P98164                                                                                            | 2             | 4.2598           | R.LPAAESLAVDWVSR.K                | 3            | LRP2_HUMAN           |
| P98164                                                                                            | 2             | 2.9818           | R.TVLVSEGITVPR.G                  | 1            | LRP2_HUMAN           |
| P98164                                                                                            | 2             | 3.0769           | R.TVVQYLNNPR.S                    | 1            | LRP2_HUMAN           |
| P98164                                                                                            | 2             | 3.0905           | R.VFWTDTVQNK.V                    | 2            | LRP2_HUMAN           |

| <i>Accession No*</i> | <i>Charge</i> | <i>XC(Max)**</i> | <i>Peptide*</i>             | <i>TC***</i> | <i>Reference No*</i> |
|----------------------|---------------|------------------|-----------------------------|--------------|----------------------|
| P98164               | 2             | 3.3331           | R.YLFWADYGQRPK.I            | 1            | LRP2_HUMAN           |
| P98164               | 2             | 2.7441           | K.QTTNFENPIYAQMENEQK.E      | 1            | LRP2_HUMAN           |
| P98164               | 2             | 2.7534           | R.TDNDGLGFR.C               | 1            | LRP2_HUMAN           |
| P98164               | 2             | 3.1603           | K.ESVAATPPSPSLPAK.P         | 2            | LRP2_HUMAN           |
| P98164               | 2             | 3.4517           | R.SGIAYILHLK.S              | 1            | LRP2_HUMAN           |
| P98164               | 2             | 2.7192           | K.ESVAATPPSPSLPAKPKPPSR.R   | 1            | LRP2_HUMAN           |
| P98164               | 2             | 3.0939           | K.IASANMDGTSVK.T            | 2            | LRP2_HUMAN           |
| P98164               | 3             | 6.901            | R.RDPTPTYSATEDTFKDTANLVK.E  | 11           | LRP2_HUMAN           |
| P98164               | 3             | 5.3378           | K.SKQTTNFENPIYAQMENEQK.E    | 2            | LRP2_HUMAN           |
| P98164               | 2             | 3.3944           | R.QNSNIEPYLIFSNR.Y          | 2            | LRP2_HUMAN           |
| P98164               | 2             | 4.5634           | R.DPTPTYSATEDTFKDTANLVK.E   | 4            | LRP2_HUMAN           |
| P98164               | 3             | 3.7652           | R.ANKYDGGSGQIAM#TTNLLSQPR.G | 1            | LRP2_HUMAN           |
| P98164               | 3             | 5.5408           | R.SGADLNMDIGVSGFGPETAIDR.S  | 1            | LRP2_HUMAN           |
| P98164               | 2             | 5.8259           | K.WLISTDLQPAAI AVNPK.L      | 1            | LRP2_HUMAN           |
| P98164               | 3             | 5.0627           | K.VVQPIQVTVSENV DNK.N       | 9            | LRP2_HUMAN           |
| P98164               | 3             | 5.0173           | K.VTASESLLLLVASQNK.I        | 1            | LRP2_HUMAN           |
| P98164               | 3             | 3.7412           | K.TNKETIINHR.L              | 1            | LRP2_HUMAN           |
| P98164               | 2             | 3.21             | K.LGWPAVGTLDMISK.R          | 2            | LRP2_HUMAN           |

***LRRFIP1 protein - Homo sapiens (Human)***

|        |   |        |                       |   |              |
|--------|---|--------|-----------------------|---|--------------|
| Q9BSL6 | 3 | 5.4253 | R.SALDKTEEEVSNHGLVK.R | 4 | Q9BSL6_HUMAN |
| Q9BSL6 | 3 | 4.3559 | K.SAAENAIEDELKAEK.R   | 3 | Q9BSL6_HUMAN |

***LSM14 protein homolog A - Homo sapiens (Human)***

|        |   |        |                           |   |             |
|--------|---|--------|---------------------------|---|-------------|
| Q8ND56 | 2 | 3.4827 | K.VSRPENEQLR.N            | 3 | LS14A_HUMAN |
| Q8ND56 | 2 | 2.8177 | K.LKEDKLEK.Q              | 1 | LS14A_HUMAN |
| Q8ND56 | 3 | 3.9464 | K.SPTMEQAVQTASAHLPAAVGR.R | 1 | LS14A_HUMAN |

***Lumican precursor - Homo sapiens (Human)***

|        |   |        |                                 |   |           |
|--------|---|--------|---------------------------------|---|-----------|
| P51884 | 2 | 3.3766 | R.FNALQYLR.L                    | 9 | LUM_HUMAN |
| P51884 | 2 | 4.2264 | K.NIPTVNENLENYYLEVNQLEK.F       | 3 | LUM_HUMAN |
| P51884 | 2 | 3.5537 | R.NNQIDHIDEK.A                  | 3 | LUM_HUMAN |
| P51884 | 4 | 5.2226 | R.LPSGLPVSLTLYLDNNKISNIPDEYFK.R | 3 | LUM_HUMAN |
| P51884 | 2 | 3.7326 | R.LKEDAVSAAFK.G                 | 6 | LUM_HUMAN |
| P51884 | 2 | 4.3317 | K.SLEYLDLSFNQIAR.L              | 2 | LUM_HUMAN |
| P51884 | 2 | 4.0388 | K.SLEDLQLTHNK.I                 | 2 | LUM_HUMAN |
| P51884 | 2 | 3.3976 | K.RFNALQYLR.L                   | 4 | LUM_HUMAN |
| P51884 | 2 | 3.5636 | K.ISNIPDEYFK.R                  | 3 | LUM_HUMAN |

| <i>Accession No*</i>                                                                                   | <i>Charge</i> | <i>XC(Max)**</i> | <i>Peptide*</i>               | <i>TC***</i> | <i>Reference No*</i> |
|--------------------------------------------------------------------------------------------------------|---------------|------------------|-------------------------------|--------------|----------------------|
| P51884                                                                                                 | 2             | 3.4516           | K.ISNIPDEYFKR.F               | 3            | LUM_HUMAN            |
| P51884                                                                                                 | 2             | 5.8953           | R.LPSGLPVSLLTLYLDNNK.I        | 5            | LUM_HUMAN            |
| <b><i>Lupus La protein - Homo sapiens (Human)</i></b>                                                  |               |                  |                               |              |                      |
| P05455                                                                                                 | 3             | 5.3042           | R.AREETDKEEPASK.Q             | 27           | LA_HUMAN             |
| P05455                                                                                                 | 3             | 5.5338           | K.FASDDEHDEHDENGATGPVKR.A     | 2            | LA_HUMAN             |
| P05455                                                                                                 | 3             | 4.5588           | K.FASDDEHDEHDENGATGPVKR.R     | 1            | LA_HUMAN             |
| P05455                                                                                                 | 3             | 4.2902           | R.SPSKPLPEVTDEYKNDVK.N        | 1            | LA_HUMAN             |
| P05455                                                                                                 | 2             | 4.2874           | R.LTTDFNVIVEALSK.S            | 2            | LA_HUMAN             |
| P05455                                                                                                 | 2             | 3.2441           | R.EETDKEEPASK.Q               | 4            | LA_HUMAN             |
| <b><i>Lutheran blood group glycoprotein precursor - Homo sapiens (Human)</i></b>                       |               |                  |                               |              |                      |
| P50895                                                                                                 | 2             | 4.955            | R.LNVFAKPEATEVSPNK.G          | 4            | LU_HUMAN             |
| P50895                                                                                                 | 2             | 3.2738           | R.LEVPVEM#NPEGYM#TSR.T        | 2            | LU_HUMAN             |
| P50895                                                                                                 | 1             | 2.3595           | K.TAEIEPK.A                   | 1            | LU_HUMAN             |
| P50895                                                                                                 | 2             | 3.7315           | R.AGAAGTAEATAR.L              | 2            | LU_HUMAN             |
| P50895                                                                                                 | 2             | 3.7373           | R.GRSPPYQLDSQGR.L             | 2            | LU_HUMAN             |
| P50895                                                                                                 | 2             | 3.7823           | R.LEVPVEMNPEGYM#TSR.T         | 3            | LU_HUMAN             |
| P50895                                                                                                 | 2             | 2.8887           | R.QGWVSSSLTLK.V               | 1            | LU_HUMAN             |
| P50895                                                                                                 | 2             | 3.7786           | R.SPPYQLDSQGR.L               | 4            | LU_HUMAN             |
| P50895                                                                                                 | 2             | 4.1834           | R.VAYLDPLELSE GK.V            | 6            | LU_HUMAN             |
| P50895                                                                                                 | 2             | 5.0798           | R.VEDYDAADDVQLSK.T            | 4            | LU_HUMAN             |
| P50895                                                                                                 | 2             | 3.1122           | R.GDGSPSPEYTLFR.L             | 2            | LU_HUMAN             |
| P50895                                                                                                 | 2             | 3.5445           | R.LEVPVEM#NPEGYM#TSR.T        | 2            | LU_HUMAN             |
| <b><i>Lymphatic vessel endothelial hyaluronic acid receptor 1 precursor - Homo sapiens (Human)</i></b> |               |                  |                               |              |                      |
| Q9Y5Y7                                                                                                 | 3             | 4.1074           | K.TDKNPEESKSPSK.T             | 2            | LYVE1_HUMAN          |
| <b><i>Lymphocyte cytosolic protein 2 - Homo sapiens (Human)</i></b>                                    |               |                  |                               |              |                      |
| Q13094                                                                                                 | 2             | 3.9022           | R.SEVLGWDPDSLADYFK.K          | 1            | LCP2_HUMAN           |
| <b><i>Lymphocyte-specific protein 1 - Homo sapiens (Human)</i></b>                                     |               |                  |                               |              |                      |
| P33241                                                                                                 | 3             | 3.763            | R.QLQAQDEEGGGHVPERPK.Q        | 1            | LSP1_HUMAN           |
| P33241                                                                                                 | 2             | 2.9397           | K.LIDRTESLNR.S                | 1            | LSP1_HUMAN           |
| P33241                                                                                                 | 2             | 3.2897           | K.IDQWLEQYTQAIETAGR.T         | 1            | LSP1_HUMAN           |
| P33241                                                                                                 | 3             | 4.6951           | K.EGPGPEDTVQDNLGAAGAEQEEHQK.C | 1            | LSP1_HUMAN           |
| <b><i>Lysosomal alpha-glucosidase precursor - Homo sapiens (Human)</i></b>                             |               |                  |                               |              |                      |
| P10253                                                                                                 | 2             | 4.37             | R.AGYIIPLQGPGLTTESR.Q         | 3            | LYAG_HUMAN           |

| <i>Accession No*</i>                                                               | <i>Charge</i> | <i>XC(Max)**</i> | <i>Peptide*</i>                  | <i>TC***</i> | <i>Reference No*</i> |
|------------------------------------------------------------------------------------|---------------|------------------|----------------------------------|--------------|----------------------|
| <b><i>Lysosomal alpha-mannosidase precursor - Homo sapiens (Human)</i></b>         |               |                  |                                  |              |                      |
| O00754                                                                             | 2             | 3.2081           | R.TFLASVQWK.E                    | 1            | MA2B1_HUMAN          |
| O00754                                                                             | 3             | 6.3593           | R.HLVLLDTAQAAAAGHR.L             | 2            | MA2B1_HUMAN          |
| O00754                                                                             | 2             | 2.7922           | R.GVSEPLMENGSGAWVR.G             | 2            | MA2B1_HUMAN          |
| <b><i>Lysosomal-associated membrane protein 1 - Homo sapiens (Human)</i></b>       |               |                  |                                  |              |                      |
| Q8WU33                                                                             | 2             | 3.381            | R.ALQATVGNYSYK.C                 | 3            | Q8WU33_HUMAN         |
| <b><i>Lysozyme C precursor - Homo sapiens (Human)</i></b>                          |               |                  |                                  |              |                      |
| P61626                                                                             | 2             | 3.7123           | R.STDYGIFQINSR.Y                 | 1            | LYSC_HUMAN           |
| P61626                                                                             | 2             | 2.8207           | R.ATNYNAGDR.S                    | 1            | LYSC_HUMAN           |
| <b><i>Macoilin - Homo sapiens (Human)</i></b>                                      |               |                  |                                  |              |                      |
| Q8N5G2                                                                             | 2             | 2.8438           | K.KLEEATAAR.A                    | 1            | MACOI_HUMAN          |
| <b><i>Macrophage mannose receptor 2 precursor - Homo sapiens (Human)</i></b>       |               |                  |                                  |              |                      |
| Q9UBG0                                                                             | 2             | 3.5904           | R.TLGDQLSLLLGAR.T                | 2            | MRC2_HUMAN           |
| <b><i>Macrophage migration inhibitory factor - Homo sapiens (Human)</i></b>        |               |                  |                                  |              |                      |
| P14174                                                                             | 3             | 3.867            | R.ISPDRVYINYDMNAANVGWNNSTFA.-    | 2            | MIF_HUMAN            |
| P14174                                                                             | 2             | 4.5614           | -.MPPMFIVNTNVPR.A                | 4            | MIF_HUMAN            |
| <b><i>Macrophage-capping protein - Homo sapiens (Human)</i></b>                    |               |                  |                                  |              |                      |
| P40121                                                                             | 2             | 3.2087           | R.M#QYAPNTQEILPQGR.E             | 2            | CAPG_HUMAN           |
| <b><i>MAGUK p55 subfamily member 5 - Homo sapiens (Human)</i></b>                  |               |                  |                                  |              |                      |
| Q8N3R9                                                                             | 2             | 3.6817           | K.NVDLASPEEHQK.H                 | 2            | MPP5_HUMAN           |
| <b><i>Major vault protein - Homo sapiens (Human)</i></b>                           |               |                  |                                  |              |                      |
| Q14764                                                                             | 3             | 4.0547           | R.VASGSPGEGISPQSAQAPQAPGDNHVVPVL | 1            | MVP_HUMAN            |
| <b><i>Malate dehydrogenase, cytoplasmic - Homo sapiens (Human)</i></b>             |               |                  |                                  |              |                      |
| P40925                                                                             | 3             | 5.0257           | K.NVIIWGNHSSTQYPDVNHAK.V         | 1            | MDHC_HUMAN           |
| P40925                                                                             | 2             | 2.8929           | K.ELTEEKESAFEFLSSA.-             | 1            | MDHC_HUMAN           |
| <b><i>Malate dehydrogenase, mitochondrial precursor - Homo sapiens (Human)</i></b> |               |                  |                                  |              |                      |
| P40926                                                                             | 2             | 2.7329           | K.KGEDFVK.T                      | 1            | MDHM_HUMAN           |
| P40926                                                                             | 2             | 3.0727           | K.HGVYNPNK.I                     | 2            | MDHM_HUMAN           |
| P40926                                                                             | 2             | 3.1799           | K.IFGVTTLDIVR.A                  | 2            | MDHM_HUMAN           |
| P40926                                                                             | 2             | 3.4295           | K.MISDAIPELK.A                   | 1            | MDHM_HUMAN           |
| P40926                                                                             | 3             | 6.5952           | R.LTLYDIAHTPGVAADLSHIETK.A       | 2            | MDHM_HUMAN           |

Accession No\* Charge XC(Max)\*\* Peptide\* TC\*\*\* Reference No\*

**Male-enhanced antigen 1 - Homo sapiens (Human)**

|        |   |        |                         |   |            |
|--------|---|--------|-------------------------|---|------------|
| Q16626 | 2 | 3.6991 | R.TM#AGVSLPAPGVPAAWAR.E | 1 | MEA1_HUMAN |
| Q16626 | 2 | 3.7266 | R.EISDAQWEDVVQK.A       | 1 | MEA1_HUMAN |

**Maltase-glucoamylase, intestinal [Includes: Maltase - Homo sapiens (Human)]**

|        |   |        |                        |   |           |
|--------|---|--------|------------------------|---|-----------|
| O43451 | 2 | 3.2984 | R.WYDYTTGVDINAR.G      | 1 | MGA_HUMAN |
| O43451 | 2 | 2.7665 | K.SSVYANAFPSTPVNPLR.L  | 1 | MGA_HUMAN |
| O43451 | 3 | 4.2225 | K.HNGVPSQTSPTVYDSNLK.V | 1 | MGA_HUMAN |
| O43451 | 2 | 2.9663 | R.EIEELYNNPQNPER.S     | 1 | MGA_HUMAN |

**Mannose-6-phosphate receptor-binding protein 1 - Homo sapiens (Human)**

|        |   |        |                        |   |             |
|--------|---|--------|------------------------|---|-------------|
| O60664 | 3 | 4.7641 | R.GLDKLEENLPILQQPTEK.V | 3 | M6PBP_HUMAN |
| O60664 | 2 | 3.7412 | K.SVVTGGVQSVMGSR.L     | 2 | M6PBP_HUMAN |
| O60664 | 2 | 3.8601 | R.TLTAADVSGAQPIISK.L   | 2 | M6PBP_HUMAN |
| O60664 | 2 | 3.3799 | R.GAVQSGVDKTK.S        | 4 | M6PBP_HUMAN |
| O60664 | 2 | 4.6924 | R.IATSLDGFVDVASVQQQR.Q | 2 | M6PBP_HUMAN |
| O60664 | 2 | 4.6891 | K.LEPQIASASEYHR.G      | 3 | M6PBP_HUMAN |
| O60664 | 2 | 5.3406 | K.DTVATQLSEAVDTR.G     | 4 | M6PBP_HUMAN |
| O60664 | 2 | 3.0125 | R.GAVQSGVDK.T          | 2 | M6PBP_HUMAN |
| O60664 | 2 | 4.1797 | K.VSGAQEMVSSAK.D       | 3 | M6PBP_HUMAN |
| O60664 | 3 | 5.2409 | K.SEEWADNHLPLTDAELAR.I | 1 | M6PBP_HUMAN |

**MAP kinase-activating death domain protein - Homo sapiens (Human)**

|        |   |        |                 |   |            |
|--------|---|--------|-----------------|---|------------|
| Q8WXG6 | 2 | 4.0725 | R.LASDSAESDSR.A | 4 | MADD_HUMAN |
|--------|---|--------|-----------------|---|------------|

**MARCKS-related protein - Homo sapiens (Human)**

|        |   |       |                                    |   |           |
|--------|---|-------|------------------------------------|---|-----------|
| P49006 | 3 | 5.757 | K.GEGESPPVNGTDEAAGATGDAIEPAPPSQGAE | 1 | MRP_HUMAN |
|--------|---|-------|------------------------------------|---|-----------|

**MASPI protein - Homo sapiens (Human)**

|         |   |        |                       |   |               |
|---------|---|--------|-----------------------|---|---------------|
| Q8IUUV8 | 2 | 2.7455 | K.SSWEDQGAAAGSTQGRK.M | 1 | Q8IUUV8_HUMAN |
|---------|---|--------|-----------------------|---|---------------|

**Mast cell carboxypeptidase A precursor - Homo sapiens (Human)**

|        |   |        |                    |   |             |
|--------|---|--------|--------------------|---|-------------|
| P15088 | 2 | 4.1588 | K.IGSTVEDNPLYVLK.I | 2 | CBPA3_HUMAN |
|--------|---|--------|--------------------|---|-------------|

**Matrin-3 - Homo sapiens (Human)**

|        |   |        |                                |   |             |
|--------|---|--------|--------------------------------|---|-------------|
| P43243 | 2 | 3.046  | R.TEEGPTLSYGR.D                | 1 | MATR3_HUMAN |
| P43243 | 3 | 4.641  | K.TDGSQKTESSTEGKEQEEK.S        | 6 | MATR3_HUMAN |
| P43243 | 2 | 3.826  | K.TESSTEGKEQEEK.S              | 1 | MATR3_HUMAN |
| P43243 | 3 | 6.7487 | R.DLSAAGIGLLAAATQSLSM#PASLGR.M | 4 | MATR3_HUMAN |

**Matrix Gla protein precursor - Homo sapiens (Human)**



| <i>Accession No*</i>                                                                        | <i>Charge</i> | <i>XC(Max)**</i> | <i>Peptide*</i>                     | <i>TC***</i> | <i>Reference No*</i> |
|---------------------------------------------------------------------------------------------|---------------|------------------|-------------------------------------|--------------|----------------------|
| P08493                                                                                      | 2             | 3.3225           | R.NANTFISPPQQR.W                    | 2            | MGP_HUMAN            |
| <b><i>Matrix-remodeling-associated protein 7 - Homo sapiens (Human)</i></b>                 |               |                  |                                     |              |                      |
| P84157                                                                                      | 3             | 5.493            | R.QEEEQDLGEGKGPSSEGPEEEDGEGFSFK.Y   | 2            | MXRA7_HUMAN          |
| <b><i>Matrix-remodelling associated protein 7 - Homo sapiens (Human)</i></b>                |               |                  |                                     |              |                      |
| Q6ZR64                                                                                      | 2             | 3.3468           | K.EEELQEEQRTEE.-                    | 2            | Q6ZR64_HUMAN         |
| <b><i>Mediator of DNA damage checkpoint protein 1 - Homo sapiens (Human)</i></b>            |               |                  |                                     |              |                      |
| Q14676                                                                                      | 3             | 4.1742           | R.DTQRGEPEGGSQDQK.G                 | 2            | MDC1_HUMAN           |
| <b><i>Mediator of RNA polymerase II transcription subunit 28 - Homo sapiens (Human)</i></b> |               |                  |                                     |              |                      |
| Q9H204                                                                                      | 2             | 2.7015           | K.EDVSELRNELQR.K                    | 1            | MED28_HUMAN          |
| <b><i>Meiosis-specific nuclear structural protein 1 - Homo sapiens (Human)</i></b>          |               |                  |                                     |              |                      |
| Q8NEH6                                                                                      | 2             | 3.3215           | R.QELYQEEQAEIYK.S                   | 1            | MNS1_HUMAN           |
| <b><i>Melanoma inhibitory activity protein 3 precursor - Homo sapiens (Human)</i></b>       |               |                  |                                     |              |                      |
| Q5JRA6                                                                                      | 2             | 3.0809           | R.GWPEVWAGSVGR.T                    | 2            | MIA3_HUMAN           |
| Q5JRA6                                                                                      | 3             | 6.2246           | R.WSAEASGKPSPPDPSGSGTATMMNSSSR.G    | 2            | MIA3_HUMAN           |
| Q5JRA6                                                                                      | 2             | 4.0557           | R.TQTAISVVEEDLK.L                   | 3            | MIA3_HUMAN           |
| Q5JRA6                                                                                      | 3             | 6.1442           | K.QGKPKSATDYSDDPNVDDGLFIVDIPK.T     | 2            | MIA3_HUMAN           |
| Q5JRA6                                                                                      | 2             | 3.4385           | R.SSEFGSVDGPHLPHR.W                 | 2            | MIA3_HUMAN           |
| Q5JRA6                                                                                      | 2             | 3.8301           | K.SAQQESLPYNMEK.V                   | 1            | MIA3_HUMAN           |
| Q5JRA6                                                                                      | 3             | 4.7498           | R.RIEEMEDELQKTER.S                  | 2            | MIA3_HUMAN           |
| Q5JRA6                                                                                      | 1             | 2.3923           | R.NEKMKNQIK.Q                       | 1            | MIA3_HUMAN           |
| Q5JRA6                                                                                      | 2             | 3.6867           | K.TLQDMEKNPELSK.E                   | 1            | MIA3_HUMAN           |
| Q5JRA6                                                                                      | 3             | 5.6194           | R.WSAEASGKPSPPDPSGSGTATM#M#NSSSR.G  | 2            | MIA3_HUMAN           |
| Q5JRA6                                                                                      | 2             | 2.9108           | K.QETSM#ILDSEKTSATAK.G              | 1            | MIA3_HUMAN           |
| Q5JRA6                                                                                      | 3             | 5.6045           | K.GMLHEEKPGEQILEGGSESESAQK.A        | 2            | MIA3_HUMAN           |
| Q5JRA6                                                                                      | 3             | 5.299            | K.GM#LHEEKPGEQILEGGSESESAQK.A       | 1            | MIA3_HUMAN           |
| Q5JRA6                                                                                      | 3             | 7.1916           | K.EREPEPEPVEANSEESDSVFSSENTEDLQEQFT | 1            | MIA3_HUMAN           |
| Q5JRA6                                                                                      | 2             | 3.4063           | R.ASESQILSIAEK.M                    | 2            | MIA3_HUMAN           |
| Q5JRA6                                                                                      | 2             | 4.1733           | K.FGSTADALVSDDETTR.L                | 2            | MIA3_HUMAN           |
| <b><i>Melanoma-associated antigen D2 - Homo sapiens (Human)</i></b>                         |               |                  |                                     |              |                      |
| Q9UNF1                                                                                      | 2             | 2.8249           | K.ATEVSKTPEAR.E                     | 2            | MAGD2_HUMAN          |
| Q9UNF1                                                                                      | 1             | 2.76             | K.ALEVSSEVVK.V                      | 2            | MAGD2_HUMAN          |
| <b><i>Melanoma-associated antigen G1 - Homo sapiens (Human)</i></b>                         |               |                  |                                     |              |                      |
| Q96MG7                                                                                      | 2             | 3.0844           | R.DGFAEEAPSTSR.G                    | 2            | MAGG1_HUMAN          |

Accession No\* Charge XC(Max)\*\* Peptide\* TC\*\*\* Reference No\*

***Membrane copper amine oxidase - Homo sapiens (Human)***

|        |   |        |                  |   |            |
|--------|---|--------|------------------|---|------------|
| Q16853 | 2 | 3.1857 | R.YVDGGFGMGK.Y   | 2 | AOC3_HUMAN |
| Q16853 | 2 | 4.3348 | R.LGPGLVDAAQAR.P | 2 | AOC3_HUMAN |

***Membrane-associated guanylate kinase, WW and PDZ domain-containing protein 1 - Homo sapie***

|        |   |        |                   |   |             |
|--------|---|--------|-------------------|---|-------------|
| Q96QZ7 | 2 | 3.3722 | K.SLVLDGPAALDGK.M | 2 | MAGI1_HUMAN |
|--------|---|--------|-------------------|---|-------------|

***Membrane-associated guanylate kinase, WW and PDZ domain-containing protein 2 - Homo sapie***

|        |   |        |                    |   |             |
|--------|---|--------|--------------------|---|-------------|
| Q86UL8 | 2 | 4.5327 | R.APGLAAADAADAAR.A | 2 | MAGI2_HUMAN |
|--------|---|--------|--------------------|---|-------------|

***Membrane-associated progesterone receptor component 1 - Homo sapiens (Human)***

|        |   |        |                             |   |             |
|--------|---|--------|-----------------------------|---|-------------|
| O00264 | 2 | 4.2014 | K.FYGPEGYPYGVFAGR.D         | 7 | PGRC1_HUMAN |
| O00264 | 3 | 4.006  | K.EGEEPTVYSDEEEPKDESAR.K    | 1 | PGRC1_HUMAN |
| O00264 | 3 | 6.0339 | K.IVRGDQPAASGDSDDDEPPPLPR.L | 2 | PGRC1_HUMAN |
| O00264 | 2 | 2.8046 | R.RDFTPAELR.R               | 2 | PGRC1_HUMAN |
| O00264 | 3 | 5.6416 | K.LLKEGEEPTVYSDEEEPKDESAR.K | 3 | PGRC1_HUMAN |
| O00264 | 2 | 3.6387 | R.GDQPAASGDSDDDEPPPLPR.L    | 4 | PGRC1_HUMAN |

***Membrane-associated progesterone receptor component 2 - Homo sapiens (Human)***

|        |   |        |                         |   |             |
|--------|---|--------|-------------------------|---|-------------|
| O15173 | 2 | 4.5777 | R.GLGAGAGAGEESPATSLPR.M | 2 | PGRC2_HUMAN |
| O15173 | 2 | 3.9673 | K.FYGPAGPYGIFAGR.D      | 5 | PGRC2_HUMAN |

***Mesoderm development candidate 2 - Homo sapiens (Human)***

|        |   |        |                   |   |             |
|--------|---|--------|-------------------|---|-------------|
| Q14696 | 2 | 3.2621 | K.DIRDYNDADMAR.L  | 2 | MESD2_HUMAN |
| Q14696 | 2 | 2.9433 | K.IDPSKPESILK.M   | 1 | MESD2_HUMAN |
| Q14696 | 2 | 3.071  | K.RPSAPVDFSK.I    | 3 | MESD2_HUMAN |
| Q14696 | 2 | 3.367  | R.DYNDADMAR.L     | 4 | MESD2_HUMAN |
| Q14696 | 3 | 4.6421 | K.DIRDYNDADM#AR.L | 2 | MESD2_HUMAN |

***Metallothionein-3 - Homo sapiens (Human)***

|        |   |        |                 |   |           |
|--------|---|--------|-----------------|---|-----------|
| P25713 | 2 | 4.1692 | K.GGEAAEAEAEK.C | 4 | MT3_HUMAN |
|--------|---|--------|-----------------|---|-----------|

***Metastasis suppressor protein 1 - Homo sapiens (Human)***

|        |   |       |                    |   |             |
|--------|---|-------|--------------------|---|-------------|
| O43312 | 2 | 3.036 | R.DTPQGEDM#LNAIR.R | 3 | MTSS1_HUMAN |
|--------|---|-------|--------------------|---|-------------|

***Methionine aminopeptidase 2 - Homo sapiens (Human)***

|        |   |        |                               |   |             |
|--------|---|--------|-------------------------------|---|-------------|
| P50579 | 4 | 5.5231 | K.SKGPSAAGEQEPDKESGASVDEVAR.Q | 2 | AMPM2_HUMAN |
|--------|---|--------|-------------------------------|---|-------------|

***Methionine-R-sulfoxide reductase B2 - Homo sapiens (Human)***

|        |   |        |                     |   |             |
|--------|---|--------|---------------------|---|-------------|
| Q9Y3D2 | 2 | 3.0909 | K.LTPEQFYVTR.E      | 1 | MSRB2_HUMAN |
| Q9Y3D2 | 3 | 4.9346 | R.EKGTEPPFSGIYLNK.E | 2 | MSRB2_HUMAN |

| <i>Accession No*</i>                                                                                                | <i>Charge</i> | <i>XC(Max)**</i> | <i>Peptide*</i>                     | <i>TC***</i> | <i>Reference No*</i> |
|---------------------------------------------------------------------------------------------------------------------|---------------|------------------|-------------------------------------|--------------|----------------------|
| Q9Y3D2                                                                                                              | 2             | 3.8711           | R.RLDTSLGSAR.T                      | 10           | MSRB2_HUMAN          |
| <b><i>Methyl-CpG-binding domain protein 4 - Homo sapiens (Human)</i></b>                                            |               |                  |                                     |              |                      |
| O95243                                                                                                              | 2             | 3.2844           | K.ADAESEPVQK.S                      | 2            | MBD4_HUMAN           |
| <b><i>Methyl-CpG-binding protein 2 - Homo sapiens (Human)</i></b>                                                   |               |                  |                                     |              |                      |
| P51608                                                                                                              | 2             | 4.7799           | K.AETSESGSAPAVPEASAPK.Q             | 2            | MECP2_HUMAN          |
| P51608                                                                                                              | 2             | 2.7214           | K.AATSEGVQVK.R                      | 2            | MECP2_HUMAN          |
| P51608                                                                                                              | 2             | 4.2863           | K.AEGGGATTSTQVMVIK.R                | 2            | MECP2_HUMAN          |
| P51608                                                                                                              | 2             | 4.6403           | K.VGDTSLDPNDFDFTVTGR.G              | 3            | MECP2_HUMAN          |
| P51608                                                                                                              | 2             | 3.8763           | R.KAEADPQAIPK.K                     | 3            | MECP2_HUMAN          |
| P51608                                                                                                              | 2             | 4.6245           | K.AEGGGATTSTQVM#VIK.R               | 3            | MECP2_HUMAN          |
| P51608                                                                                                              | 2             | 2.7725           | K.EVVKPLLSTLGEK.S                   | 1            | MECP2_HUMAN          |
| <b><i>Methylcrotonoyl-CoA carboxylase beta chain, mitochondrial precursor - Homo sapiens (Human)</i></b>            |               |                  |                                     |              |                      |
| Q9HCC0                                                                                                              | 2             | 3.6637           | R.VWDDGIIDPADTR.L                   | 2            | MCCC2_HUMAN          |
| <b><i>Methylcrotonoyl-CoA carboxylase subunit alpha, mitochondrial precursor - Homo sapiens (Human)</i></b>         |               |                  |                                     |              |                      |
| Q96RQ3                                                                                                              | 2             | 3.4213           | K.QEIIIFIGPPSAIR.D                  | 2            | MCCA_HUMAN           |
| <b><i>Methylmalonate-semialdehyde dehydrogenase [acylating], mitochondrial precursor - Homo sapiens (Human)</i></b> |               |                  |                                     |              |                      |
| Q02252                                                                                                              | 2             | 4.3017           | R.VNAGDQPGADLGLITPQAK.E             | 2            | MMSA_HUMAN           |
| Q02252                                                                                                              | 3             | 3.8964           | K.SDKWIDIHNPATNEVIGR.V              | 2            | MMSA_HUMAN           |
| Q02252                                                                                                              | 2             | 2.8549           | K.RVQANMGAK.N                       | 1            | MMSA_HUMAN           |
| <b><i>Methylmalonyl-CoA epimerase, mitochondrial precursor - Homo sapiens (Human)</i></b>                           |               |                  |                                     |              |                      |
| Q96PE7                                                                                                              | 2             | 2.8364           | K.MELLHPLGR.D                       | 1            | MCEE_HUMAN           |
| <b><i>Methylmalonyl-CoA mutase, mitochondrial precursor - Homo sapiens (Human)</i></b>                              |               |                  |                                     |              |                      |
| P22033                                                                                                              | 2             | 3.908            | K.AAVQVLDDIEK.C                     | 4            | MUTA_HUMAN           |
| P22033                                                                                                              | 3             | 3.7001           | R.EVAQQAVDADVHAVGVSTLAAGHK.T        | 1            | MUTA_HUMAN           |
| <b><i>Methylosome subunit pICln - Homo sapiens (Human)</i></b>                                                      |               |                  |                                     |              |                      |
| P54105                                                                                                              | 2             | 3.9837           | R.LEGMLSQSVSSQYNMAGVR.T             | 1            | ICLN_HUMAN           |
| P54105                                                                                                              | 3             | 5.3503           | R.TEDSIRDYEDGMEVDTTPTVAGQFEDADVDH.- | 2            | ICLN_HUMAN           |
| P54105                                                                                                              | 3             | 4.6659           | R.TEDSIRDYEDGM#EVDTTPTVAGQFEDADVDH. | 1            | ICLN_HUMAN           |
| P54105                                                                                                              | 2             | 4.2821           | K.GLGTGLTYIAESR.L                   | 1            | ICLN_HUMAN           |
| <b><i>MHC class II regulatory factor RFX1 - Homo sapiens (Human)</i></b>                                            |               |                  |                                     |              |                      |
| P22670                                                                                                              | 3             | 5.4604           | R.ASETVSEASPGSTASQTGVPTQVVQQVQGTQ   | 2            | RFX1_HUMAN           |
| <b><i>MICAL-like protein 1 - Homo sapiens (Human)</i></b>                                                           |               |                  |                                     |              |                      |

| <i>Accession No*</i>                                                                                  | <i>Charge</i> | <i>XC(Max)**</i> | <i>Peptide*</i>                      | <i>TC***</i> | <i>Reference No*</i> |
|-------------------------------------------------------------------------------------------------------|---------------|------------------|--------------------------------------|--------------|----------------------|
| Q8N3F8                                                                                                | 3             | 6.1682           | K.SSSEPAVHAPGTPGNPVSLSTNSSLASSGELV   | 2            | MILK1_HUMAN          |
| Q8N3F8                                                                                                | 2             | 4.4369           | R.VEQMPQASPLAPR.T                    | 4            | MILK1_HUMAN          |
| Q8N3F8                                                                                                | 3             | 3.8382           | R.SGTRPGPFSSQPK.Q                    | 1            | MILK1_HUMAN          |
| <b><i>Microfibrillar-associated protein 1 - Homo sapiens (Human)</i></b>                              |               |                  |                                      |              |                      |
| P55081                                                                                                | 2             | 3.8172           | K.EQEAPEEQEEDSSSDPR.L                | 3            | MFAP1_HUMAN          |
| P55081                                                                                                | 2             | 3.0447           | R.DFSAPTLEDHFNK.T                    | 2            | MFAP1_HUMAN          |
| P55081                                                                                                | 3             | 3.8567           | K.AKEQEAPEEQEEDSSSDPR.L              | 1            | MFAP1_HUMAN          |
| P55081                                                                                                | 2             | 3.0154           | R.ISEDVEER.L                         | 2            | MFAP1_HUMAN          |
| <b><i>Microsomal triglyceride transfer protein large subunit precursor - Homo sapiens (Human)</i></b> |               |                  |                                      |              |                      |
| P55157                                                                                                | 3             | 3.7617           | K.YAEAGEGPISHLATTALQR.Y              | 1            | MTP_HUMAN            |
| <b><i>Microtubule-associated protein - Homo sapiens (Human)</i></b>                                   |               |                  |                                      |              |                      |
| Q68D74                                                                                                | 2             | 3.6351           | R.EAQTLDLSQIQETN.-                   | 3            | Q68D74_HUMAN         |
| <b><i>Microtubule-associated protein 1A - Homo sapiens (Human)</i></b>                                |               |                  |                                      |              |                      |
| P78559                                                                                                | 3             | 4.5245           | R.FHTSTYDLPGPEGAGPFEASQPADSAVPATSG   | 2            | MAP1A_HUMAN          |
| P78559                                                                                                | 2             | 2.992            | R.ESTFLDEGPDDEQEVPLR.E               | 1            | MAP1A_HUMAN          |
| P78559                                                                                                | 2             | 3.5515           | K.SSLLLDVTVSIPSSR.T                  | 1            | MAP1A_HUMAN          |
| P78559                                                                                                | 2             | 3.1285           | K.ELSSEPQTPPAQK.G                    | 2            | MAP1A_HUMAN          |
| P78559                                                                                                | 2             | 4.488            | R.YSAQTDITDDSLDR.K                   | 1            | MAP1A_HUMAN          |
| P78559                                                                                                | 2             | 2.92             | R.VPSAPGQESPIIDPK.L                  | 2            | MAP1A_HUMAN          |
| <b><i>Microtubule-associated protein 4 isoform 1 variant - Homo sapiens (Human)</i></b>               |               |                  |                                      |              |                      |
| Q59FT2                                                                                                | 4             | 4.9053           | K.GISEDHLESLQDVGQSAAPTFM#ISPETVTGT   | 2            | Q59FT2_HUMAN         |
| Q59FT2                                                                                                | 3             | 6.5688           | K.GISEDHLESLQDVGQSAAPTFMISPETVTGTG   | 2            | Q59FT2_HUMAN         |
| <b><i>Microtubule-associated protein RP/EB family member 1 - Homo sapiens (Human)</i></b>             |               |                  |                                      |              |                      |
| Q15691                                                                                                | 2             | 4.2733           | K.LTVEDLEKERDFYFGK.L                 | 2            | MARE1_HUMAN          |
| Q15691                                                                                                | 2             | 3.7252           | R.NIELICQENEGENDPVLQR.I              | 2            | MARE1_HUMAN          |
| Q15691                                                                                                | 2             | 3.4109           | K.LTVEDLEKER.D                       | 6            | MARE1_HUMAN          |
| <b><i>Microtubule-associated protein RP/EB family member 2 - Homo sapiens (Human)</i></b>             |               |                  |                                      |              |                      |
| Q15555                                                                                                | 3             | 6.5272           | K.SDKDLETQVIQLNEQVHSLK.L             | 7            | MARE2_HUMAN          |
| <b><i>Microtubule-associated protein tau - Homo sapiens (Human)</i></b>                               |               |                  |                                      |              |                      |
| P10636                                                                                                | 3             | 6.6671           | R.HLSNVSSSTGSIDMVDSPQLATLADEVSAVLAK. | 1            | TAU_HUMAN            |
| P10636                                                                                                | 2             | 2.8472           | R.TPSLPTPPPTREP.K                    | 2            | TAU_HUMAN            |
| P10636                                                                                                | 2             | 3.0128           | R.TPSLPTPPTR.E                       | 2            | TAU_HUMAN            |
| P10636                                                                                                | 2             | 2.8259           | R.SRTPSLPTPPTR.E                     | 1            | TAU_HUMAN            |

| <i>Accession No*</i> | <i>Charge</i> | <i>XC(Max)**</i> | <i>Peptide*</i>                    | <i>TC***</i> | <i>Reference No*</i> |
|----------------------|---------------|------------------|------------------------------------|--------------|----------------------|
| P10636               | 2             | 4.0707           | R.SGYSSPGSPGTPGSR.S                | 6            | TAU_HUMAN            |
| P10636               | 2             | 3.2818           | K.ASPAQDGRPPQTAAR.E                | 3            | TAU_HUMAN            |
| P10636               | 2             | 2.7588           | R.QPSGTGPEDETEGGR.H                | 1            | TAU_HUMAN            |
| P10636               | 2             | 3.6391           | R.LQTAPVPMPLDK.N                   | 4            | TAU_HUMAN            |
| P10636               | 3             | 6.9266           | R.KDQGGYTMHQDQEGDTDAGLK.E          | 4            | TAU_HUMAN            |
| P10636               | 2             | 4.0421           | K.VSTEIPASEPDGPSVGR.A              | 6            | TAU_HUMAN            |
| P10636               | 3             | 6.9564           | R.HLSNVSSTGSIDM#VDSPQLATLADEVASLAK | 2            | TAU_HUMAN            |
| P10636               | 2             | 2.8005           | R.HAPPELLK.H                       | 1            | TAU_HUMAN            |
| P10636               | 3             | 5.3221           | R.GPSLGEDTKEADLPEPSEKQPAAPR.G      | 3            | TAU_HUMAN            |
| P10636               | 2             | 2.7135           | R.AAFPGAPGEGPEAR.G                 | 1            | TAU_HUMAN            |
| P10636               | 2             | 4.1364           | K.AKTDHGAEIVYK.S                   | 5            | TAU_HUMAN            |
| P10636               | 2             | 2.9546           | R.LQTAPVPM#PDLK.N                  | 1            | TAU_HUMAN            |
| P10636               | 2             | 4.4414           | K.DQGGYTM#HQDQEGDTDAGLK.E          | 8            | TAU_HUMAN            |
| P10636               | 2             | 3.9765           | K.SPVVSGDTSR.H                     | 8            | TAU_HUMAN            |
| P10636               | 3             | 4.6084           | K.DQGGYTMHQDQEGDTDAGLK.E           | 6            | TAU_HUMAN            |
| P10636               | 2             | 4.009            | R.EATRQPSGTGPEDETEGGR.H            | 6            | TAU_HUMAN            |
| P10636               | 2             | 4.0624           | K.ESPLQPTEDGSEEPGSETSDAK.S         | 3            | TAU_HUMAN            |
| P10636               | 2             | 3.1403           | K.KLDLSNVQSK.C                     | 2            | TAU_HUMAN            |
| P10636               | 3             | 3.9657           | K.IGSLDNITHVPGGGNKK.I              | 1            | TAU_HUMAN            |
| P10636               | 3             | 4.0776           | R.QEFEVMEHDHAGTYGLGDRK.D           | 1            | TAU_HUMAN            |
| P10636               | 2             | 2.822            | K.SKIGSTENLK.H                     | 1            | TAU_HUMAN            |
| P10636               | 2             | 4.2618           | R.GPSLGEDTKEADLPEPSEK.Q            | 4            | TAU_HUMAN            |
| P10636               | 2             | 3.9672           | K.STPTAEDVTAPLVDEGAPGK.Q           | 2            | TAU_HUMAN            |
| P10636               | 2             | 3.9447           | K.TDHGAEIVYK.S                     | 10           | TAU_HUMAN            |
| P10636               | 1             | 2.3451           | K.TPPSSGEPK.S                      | 2            | TAU_HUMAN            |
| P10636               | 2             | 3.4954           | K.TPPSSGEPKSGDR.S                  | 6            | TAU_HUMAN            |
| P10636               | 2             | 3.2427           | K.VVQEGFLR.E                       | 2            | TAU_HUMAN            |
| P10636               | 2             | 4.3113           | K.IGSLDNITHVPGGGNKK.K              | 8            | TAU_HUMAN            |

***Microtubule-associated serine/threonine-protein kinase 3 - Homo sapiens (Human)***

|        |   |        |                           |   |             |
|--------|---|--------|---------------------------|---|-------------|
| O60307 | 2 | 3.4614 | K.FAFSSEDEGVGPGPAGPK.R    | 1 | MAST3_HUMAN |
| O60307 | 3 | 3.9508 | K.RPVFILGEPDPPPAATPVMPK.P | 1 | MAST3_HUMAN |

***Microtubule-associated serine/threonine-protein kinase 4 - Homo sapiens (Human)***

|        |   |        |                     |   |             |
|--------|---|--------|---------------------|---|-------------|
| O15021 | 2 | 3.6776 | R.SPGTVM#ESNPQQR.E  | 1 | MAST4_HUMAN |
| O15021 | 2 | 3.0393 | K.SGPDVFPATPGSQNK.A | 1 | MAST4_HUMAN |

***Mimitin, mitochondrial precursor - Homo sapiens (Human)***

| <i>Accession No*</i>                                                                                  | <i>Charge</i> | <i>XC(Max)**</i> | <i>Peptide*</i>            | <i>TC***</i> | <i>Reference No*</i> |
|-------------------------------------------------------------------------------------------------------|---------------|------------------|----------------------------|--------------|----------------------|
| Q8N183                                                                                                | 3             | 3.774            | K.GHASAPYFGKEEPSVAPSSTGK.T | 1            | MIMIT_HUMAN          |
| Q8N183                                                                                                | 2             | 2.7937           | K.TFQPGSWMPR.D             | 1            | MIMIT_HUMAN          |
| <b><i>Mineralocorticoid receptor - Homo sapiens (Human)</i></b>                                       |               |                  |                            |              |                      |
| P08235                                                                                                | 3             | 4.6248           | R.DADYSYEQQNQGSMSPAK.I     | 2            | MCR_HUMAN            |
| P08235                                                                                                | 2             | 3.103            | R.DADYSYEQQNQGSM#SPAK.I    | 1            | MCR_HUMAN            |
| P08235                                                                                                | 2             | 3.8271           | R.WGQVSQAVER.S             | 1            | MCR_HUMAN            |
| <b><i>MIR-interacting saposin-like protein precursor - Homo sapiens (Human)</i></b>                   |               |                  |                            |              |                      |
| Q9Y2B0                                                                                                | 1             | 3.3647           | R.IDSDISGTLK.F             | 4            | MSAP_HUMAN           |
| Q9Y2B0                                                                                                | 2             | 2.7407           | K.EYGEQIDPSTHR.K           | 1            | MSAP_HUMAN           |
| Q9Y2B0                                                                                                | 2             | 3.184            | K.KTIQMGSFR.I              | 3            | MSAP_HUMAN           |
| Q9Y2B0                                                                                                | 2             | 3.9678           | R.NGESSELDLQGIR.I          | 3            | MSAP_HUMAN           |
| Q9Y2B0                                                                                                | 3             | 4.7638           | R.ALVDELEWEIAQVDPK.K       | 2            | MSAP_HUMAN           |
| Q9Y2B0                                                                                                | 2             | 4.1106           | R.MKEYGEQIDPSTHR.K         | 3            | MSAP_HUMAN           |
| Q9Y2B0                                                                                                | 3             | 3.8725           | R.M#KEYGEQIDPSTHR.K        | 1            | MSAP_HUMAN           |
| Q9Y2B0                                                                                                | 3             | 4.2186           | R.SEAHLTELLEEICDR.M        | 2            | MSAP_HUMAN           |
| Q9Y2B0                                                                                                | 2             | 3.3427           | R.INPDGSQSVVEVPYAR.S       | 2            | MSAP_HUMAN           |
| Q9Y2B0                                                                                                | 2             | 4.3888           | R.ALVDELEWEIAQVDPKK.T      | 2            | MSAP_HUMAN           |
| <b><i>Misshapen-like kinase 1 - Homo sapiens (Human)</i></b>                                          |               |                  |                            |              |                      |
| Q8N4C8                                                                                                | 2             | 3.1616           | R.SQSLQDQPTR.N             | 1            | MINK1_HUMAN          |
| <b><i>Mitochondrial 28S ribosomal protein S32, mitochondrial precursor - Homo sapiens (Human)</i></b> |               |                  |                            |              |                      |
| Q9Y6G3                                                                                                | 3             | 4.0039           | K.VEHLEEGPMIEQLSK.M        | 1            | RT32_HUMAN           |
| <b><i>Mitochondrial 28S ribosomal protein S36 - Homo sapiens (Human)</i></b>                          |               |                  |                            |              |                      |
| P82909                                                                                                | 2             | 3.6365           | K.LVSQEEMEFIQR.G           | 6            | RT36_HUMAN           |
| P82909                                                                                                | 2             | 3.3125           | R.VVQVVKPHTPLIR.F          | 2            | RT36_HUMAN           |
| P82909                                                                                                | 2             | 5.4049           | K.SPDLLM#YQGPPDTAEIHK.T    | 10           | RT36_HUMAN           |
| P82909                                                                                                | 3             | 5.2676           | K.SPDLLMYQGPPDTAEIHK.T     | 5            | RT36_HUMAN           |
| P82909                                                                                                | 2             | 5.3284           | R.KLVSQEEMEFIQR.G          | 9            | RT36_HUMAN           |
| P82909                                                                                                | 2             | 4.0738           | R.SAGLPSHSSVISQHSK.G       | 3            | RT36_HUMAN           |
| P82909                                                                                                | 2             | 3.5656           | K.LVSQEEM#EFIQR.G          | 3            | RT36_HUMAN           |
| P82909                                                                                                | 2             | 4.8192           | R.KLVSQEEM#EFIQR.G         | 6            | RT36_HUMAN           |
| <b><i>Mitochondrial 39S ribosomal protein L49 - Homo sapiens (Human)</i></b>                          |               |                  |                            |              |                      |
| Q13405                                                                                                | 2             | 4.0494           | R.FVESVDEYQFVER.L          | 3            | RM49_HUMAN           |
| <b><i>Mitochondrial 39S ribosomal protein L50 - Homo sapiens (Human)</i></b>                          |               |                  |                            |              |                      |

| <i>Accession No*</i>                                                                                     | <i>Charge</i> | <i>XC(Max)**</i> | <i>Peptide*</i>                    | <i>TC***</i> | <i>Reference No*</i> |
|----------------------------------------------------------------------------------------------------------|---------------|------------------|------------------------------------|--------------|----------------------|
| Q8N5N7                                                                                                   | 3             | 5.7437           | K.FNLLAHLADDLGHVVPNSR.L            | 4            | RM50_HUMAN           |
| <b><i>Mitochondrial antiviral-signaling protein - Homo sapiens (Human)</i></b>                           |               |                  |                                    |              |                      |
| Q7Z434                                                                                                   | 3             | 3.8897           | K.VPTTLM#PVNTVALKVPANPASVSTVPSK.L  | 1            | MAVS_HUMAN           |
| Q7Z434                                                                                                   | 2             | 4.0201           | K.VPTTLM#PVNTVALK.V                | 2            | MAVS_HUMAN           |
| Q7Z434                                                                                                   | 2             | 4.2804           | K.VPANPASVSTVPSK.L                 | 4            | MAVS_HUMAN           |
| Q7Z434                                                                                                   | 2             | 3.6334           | K.VPTTLM#PVNTVALK.V                | 3            | MAVS_HUMAN           |
| Q7Z434                                                                                                   | 2             | 3.3765           | K.VSASTVPTDGSSR.N                  | 3            | MAVS_HUMAN           |
| Q7Z434                                                                                                   | 2             | 4.2357           | R.GPVSPSVSFQPLAR.S                 | 3            | MAVS_HUMAN           |
| Q7Z434                                                                                                   | 4             | 5.1334           | R.NPDGGPLESSDLAALSPLTSSGHQEQDTELG  | 1            | MAVS_HUMAN           |
| Q7Z434                                                                                                   | 2             | 4.8441           | R.LPGPTGSVVSTGTSFSSSSPGLASAGAAEGK. | 2            | MAVS_HUMAN           |
| Q7Z434                                                                                                   | 3             | 6.08             | R.EKEPSYPMPVQETQAPESPGENSEQALQTLSP | 2            | MAVS_HUMAN           |
| <b><i>Mitochondrial coiled-coil domain 1 - Homo sapiens (Human)</i></b>                                  |               |                  |                                    |              |                      |
| A2AB29                                                                                                   | 2             | 3.2029           | K.ASMEEQTSSR.G                     | 2            | A2AB29_HUMAN         |
| <b><i>Mitochondrial coiled-coil domain protein 1, mitochondrial precursor - Homo sapiens (Human)</i></b> |               |                  |                                    |              |                      |
| P59942                                                                                                   | 2             | 2.7552           | K.ASM#EEQTNSR.G                    | 1            | MCCD1_HUMAN          |
| P59942                                                                                                   | 2             | 2.8143           | K.ASMEEQTNSR.G                     | 1            | MCCD1_HUMAN          |
| <b><i>Mitochondrial fission regulator 1 - Homo sapiens (Human)</i></b>                                   |               |                  |                                    |              |                      |
| Q15390                                                                                                   | 2             | 3.7278           | K.TPALANEEALQK.I                   | 2            | MTFR1_HUMAN          |
| Q15390                                                                                                   | 2             | 2.8238           | R.SDSQDEVEK.G                      | 1            | MTFR1_HUMAN          |
| <b><i>Mitochondrial import inner membrane translocase subunit Tim10 - Homo sapiens (Human)</i></b>       |               |                  |                                    |              |                      |
| P62072                                                                                                   | 3             | 5.0895           | K.KLTELSMQDEELMK.R                 | 5            | TIM10_HUMAN          |
| P62072                                                                                                   | 2             | 3.0372           | K.LTELSM#QDEELM#K.R                | 1            | TIM10_HUMAN          |
| P62072                                                                                                   | 2             | 4.1028           | K.LTELSMQDEELMKR.V                 | 4            | TIM10_HUMAN          |
| P62072                                                                                                   | 2             | 4.7812           | K.LTELSMQDEELMK.R                  | 3            | TIM10_HUMAN          |
| P62072                                                                                                   | 3             | 4.1075           | R.AQQLAAELEVEMMADMYNR.M            | 1            | TIM10_HUMAN          |
| P62072                                                                                                   | 2             | 3.9836           | K.LTELSMQDEELM#K.R                 | 3            | TIM10_HUMAN          |
| P62072                                                                                                   | 3             | 5.6522           | K.KLTELSMQDEELMKR.V                | 7            | TIM10_HUMAN          |
| P62072                                                                                                   | 2             | 4.6866           | K.KLTELSMQDEELM#K.R                | 1            | TIM10_HUMAN          |
| P62072                                                                                                   | 3             | 4.0347           | K.KLTELSM#QDEELM#KR.V              | 1            | TIM10_HUMAN          |
| <b><i>Mitochondrial import inner membrane translocase subunit Tim13 - Homo sapiens (Human)</i></b>       |               |                  |                                    |              |                      |
| Q9Y5L4                                                                                                   | 2             | 5.6608           | K.VQIAVANAQELLQR.M                 | 3            | TIM13_HUMAN          |
| <b><i>Mitochondrial import inner membrane translocase subunit Tim8 A - Homo sapiens (Human)</i></b>      |               |                  |                                    |              |                      |
| O60220                                                                                                   | 2             | 3.746            | R.FIDTSQFILNR.L                    | 2            | TIM8A_HUMAN          |

| <i>Accession No*</i>                                                                                  | <i>Charge</i> | <i>XC(Max)**</i> | <i>Peptide*</i>                     | <i>TC***</i> | <i>Reference No*</i> |
|-------------------------------------------------------------------------------------------------------|---------------|------------------|-------------------------------------|--------------|----------------------|
| O60220                                                                                                | 2             | 3.584            | K.SKPVFSESLSD.-                     | 4            | TIM8A_HUMAN          |
| <b><i>Mitochondrial import inner membrane translocase subunit Tim8 B - Homo sapiens (Human)</i></b>   |               |                  |                                     |              |                      |
| Q9Y5J9                                                                                                | 2             | 3.0552           | R.LVAAEQQK.A                        | 2            | TIM8B_HUMAN          |
| <b><i>Mitochondrial import inner membrane translocase subunit Tim9 - Homo sapiens (Human)</i></b>     |               |                  |                                     |              |                      |
| Q9Y5J7                                                                                                | 2             | 4.8287           | R.FQEYHIQQNEALAAK.A                 | 1            | TIM9_HUMAN           |
| <b><i>Mitochondrial import receptor subunit TOM22 homolog - Homo sapiens (Human)</i></b>              |               |                  |                                     |              |                      |
| Q9NS69                                                                                                | 2             | 3.3063           | R.LWGLTEMFPER.V                     | 2            | TOM22_HUMAN          |
| Q9NS69                                                                                                | 2             | 3.6858           | K.LQMEQQQLQQR.Q                     | 2            | TOM22_HUMAN          |
| <b><i>Mitochondrial inner membrane protein - Homo sapiens (Human)</i></b>                             |               |                  |                                     |              |                      |
| Q16891                                                                                                | 2             | 3.9931           | K.VVSQYHELVVQAR.D                   | 1            | IMMT_HUMAN           |
| Q16891                                                                                                | 2             | 3.1736           | K.AAM#DNSEIAGEKK.S                  | 2            | IMMT_HUMAN           |
| Q16891                                                                                                | 2             | 3.9237           | R.KAVDEAADALLK.A                    | 1            | IMMT_HUMAN           |
| Q16891                                                                                                | 3             | 4.5625           | K.QKGDTPASATAPTEAAQIISAAGDTLSVPAPAV | 1            | IMMT_HUMAN           |
| Q16891                                                                                                | 2             | 3.6411           | K.AAMDNSEIAGEKK.S                   | 2            | IMMT_HUMAN           |
| Q16891                                                                                                | 2             | 4.6492           | K.LHNMIVDLDNVVK.K                   | 2            | IMMT_HUMAN           |
| Q16891                                                                                                | 2             | 4.1687           | K.EVAGAKPHITAAEGK.L                 | 1            | IMMT_HUMAN           |
| Q16891                                                                                                | 2             | 2.7566           | R.SEIQAEQDR.K                       | 1            | IMMT_HUMAN           |
| Q16891                                                                                                | 2             | 3.3915           | K.AVDEAADALLK.A                     | 2            | IMMT_HUMAN           |
| <b><i>Mitochondrial intermembrane space import and assembly protein 40 - Homo sapiens (Human)</i></b> |               |                  |                                     |              |                      |
| Q8N4Q1                                                                                                | 2             | 5.6225           | K.KPAEQAEETAPEATATKEEEGSS.-         | 2            | MIA40_HUMAN          |
| Q8N4Q1                                                                                                | 1             | 2.2333           | R.IIFVTK.E                          | 2            | MIA40_HUMAN          |
| Q8N4Q1                                                                                                | 2             | 5.2254           | K.KPAEQAEETAPEATATK.E               | 2            | MIA40_HUMAN          |
| Q8N4Q1                                                                                                | 3             | 3.8344           | K.YPDLYPQEDEDEEEEREK.K              | 1            | MIA40_HUMAN          |
| <b><i>Mitochondrial precursor proteins import receptor - Homo sapiens (Human)</i></b>                 |               |                  |                                     |              |                      |
| O94826                                                                                                | 2             | 3.0004           | K.DKEGEALEVK.E                      | 1            | TOM70_HUMAN          |
| <b><i>Mitogen-activated protein kinase kinase kinase 11 - Homo sapiens (Human)</i></b>                |               |                  |                                     |              |                      |
| Q16584                                                                                                | 2             | 2.8164           | R.EM#PRDSFHSMQEGWK.R                | 1            | M3K11_HUMAN          |
| <b><i>Mitogen-activated protein kinase kinase kinase 3 - Homo sapiens (Human)</i></b>                 |               |                  |                                     |              |                      |
| Q81VH8                                                                                                | 2             | 2.9713           | K.SVEEELHQR.G                       | 2            | M4K3_HUMAN           |
| <b><i>MKL/myocardin-like protein 2 - Homo sapiens (Human)</i></b>                                     |               |                  |                                     |              |                      |
| Q9ULH7                                                                                                | 3             | 4.241            | R.M#TNNEDSLSPTSSTLSNLELDAAEKDR.K    | 1            | MKL2_HUMAN           |
| Q9ULH7                                                                                                | 2             | 3.1024           | R.GLPVSGTKPDLIER.L                  | 1            | MKL2_HUMAN           |



*Accession No\* Charge XC(Max)\*\* Peptide\* TC\*\*\* Reference No\**

***Moesin - Homo sapiens (Human)***

|        |   |        |                                    |   |            |
|--------|---|--------|------------------------------------|---|------------|
| P26038 | 2 | 3.5429 | R.RALELEQER.K                      | 4 | MOES_HUMAN |
| P26038 | 2 | 3.4011 | K.AQMVQEDLEK.T                     | 2 | MOES_HUMAN |
| P26038 | 2 | 4.1831 | K.AQQELEEQTR.R                     | 4 | MOES_HUMAN |
| P26038 | 3 | 5.2286 | K.ERQEAAEAKEALLQASR.D              | 4 | MOES_HUMAN |
| P26038 | 2 | 3.3741 | K.QRIDEFESM#.-                     | 3 | MOES_HUMAN |
| P26038 | 3 | 4.938  | K.KTQEQLALEM#AELTAR.I              | 3 | MOES_HUMAN |
| P26038 | 2 | 3.2849 | K.ESEAVEVWQK.A                     | 2 | MOES_HUMAN |
| P26038 | 2 | 4.2416 | K.KAQQELEEQTR.R                    | 4 | MOES_HUMAN |
| P26038 | 2 | 3.2498 | K.KAQQELEEQTRR.A                   | 2 | MOES_HUMAN |
| P26038 | 3 | 4.004  | R.SEEERTTEAEKNER.V                 | 2 | MOES_HUMAN |
| P26038 | 3 | 4.3635 | K.TAM#STPHVAEPAENEQDEQDENGAEASADLR | 1 | MOES_HUMAN |
| P26038 | 2 | 3.0836 | R.ISQLEM#AR.Q                      | 1 | MOES_HUMAN |
| P26038 | 2 | 3.7402 | K.AQM#VQEDLEK.T                    | 3 | MOES_HUMAN |
| P26038 | 3 | 7.2066 | K.TAMSTPHVAEPAENEQDEQDENGAEASADLR. | 1 | MOES_HUMAN |
| P26038 | 1 | 3.0347 | R.ALELEQER.K                       | 4 | MOES_HUMAN |
| P26038 | 2 | 3.976  | K.ALTSELANARDESKK.T                | 1 | MOES_HUMAN |
| P26038 | 3 | 5.1609 | R.DQKKTQEQLALEMAELTAR.I            | 4 | MOES_HUMAN |
| P26038 | 2 | 4.6724 | K.KTANDMIHAENMR.L                  | 3 | MOES_HUMAN |
| P26038 | 2 | 4.3137 | K.ALTSELANARDESK.K                 | 3 | MOES_HUMAN |
| P26038 | 1 | 2.2243 | R.IDEFESM#.-                       | 1 | MOES_HUMAN |
| P26038 | 2 | 3.3401 | K.TANDM#IHAENMR.L                  | 2 | MOES_HUMAN |
| P26038 | 3 | 4.543  | K.TQEQLALEMAELTAR.I                | 4 | MOES_HUMAN |
| P26038 | 2 | 4.5906 | K.TQEQLALEM#AELTAR.I               | 4 | MOES_HUMAN |
| P26038 | 2 | 4.5191 | K.TANDMIHAENMR.L                   | 2 | MOES_HUMAN |
| P26038 | 2 | 3.1676 | K.TANDM#IHAENM#R.L                 | 1 | MOES_HUMAN |
| P26038 | 3 | 3.9004 | R.QEAAEAKEALLQASR.D                | 4 | MOES_HUMAN |
| P26038 | 2 | 3.6553 | K.ALTSELANAR.D                     | 7 | MOES_HUMAN |
| P26038 | 2 | 2.8335 | R.ISQLEMAR.Q                       | 3 | MOES_HUMAN |

***mRNA cap guanine-N7 methyltransferase - Homo sapiens (Human)***

|        |   |        |                 |   |            |
|--------|---|--------|-----------------|---|------------|
| O43148 | 2 | 3.1405 | R.KLDPEIVPEEK.D | 2 | MCES_HUMAN |
|--------|---|--------|-----------------|---|------------|

***mRNA-decapping enzyme 1A - Homo sapiens (Human)***

|        |   |        |                           |   |             |
|--------|---|--------|---------------------------|---|-------------|
| Q9NPI6 | 2 | 2.8342 | R.APLNVTNTAGTSLPSVDLLQK.L | 1 | DCP1A_HUMAN |
|--------|---|--------|---------------------------|---|-------------|

***MSTP116 - Homo sapiens (Human)***

|        |   |        |                   |   |              |
|--------|---|--------|-------------------|---|--------------|
| Q7Z2S7 | 2 | 3.3567 | K.EEDPAVLISEVLR.R | 1 | Q7Z2S7_HUMAN |
|--------|---|--------|-------------------|---|--------------|

| <i>Accession No*</i>                                                                                         | <i>Charge</i> | <i>XC(Max)**</i> | <i>Peptide*</i>                    | <i>TC***</i> | <i>Reference No*</i> |
|--------------------------------------------------------------------------------------------------------------|---------------|------------------|------------------------------------|--------------|----------------------|
| Q7Z2S7                                                                                                       | 3             | 4.0174           | R.SLLKEEDPAVLISEVLR.R              | 2            | Q7Z2S7_HUMAN         |
| <b><i>Msx2-interacting protein - Homo sapiens (Human)</i></b>                                                |               |                  |                                    |              |                      |
| Q96T58                                                                                                       | 3             | 3.7933           | K.AAPTPTPAPVVPVPLPAPAPAPHGEAR.I    | 1            | MINT_HUMAN           |
| Q96T58                                                                                                       | 3             | 3.9299           | K.VDATRPEATTEVGPQIGVK.E            | 1            | MINT_HUMAN           |
| Q96T58                                                                                                       | 3             | 4.4025           | K.DAGTDKNPPETAPVEVVEK.K            | 1            | MINT_HUMAN           |
| Q96T58                                                                                                       | 2             | 2.7173           | K.AAEEEAGSEQKR.D                   | 1            | MINT_HUMAN           |
| <b><i>mTERF domain-containing protein 2 - Homo sapiens (Human)</i></b>                                       |               |                  |                                    |              |                      |
| Q7Z6M4                                                                                                       | 2             | 3.083            | R.EEEESESSTSDDKR.A                 | 2            | MTER2_HUMAN          |
| Q7Z6M4                                                                                                       | 3             | 5.8917           | K.LLAREEEEESESSTSDDKR.A            | 2            | MTER2_HUMAN          |
| <b><i>Mucin-13 precursor - Homo sapiens (Human)</i></b>                                                      |               |                  |                                    |              |                      |
| Q9H3R2                                                                                                       | 3             | 4.1146           | K.HSMAYQDLHSEITSLFK.D              | 2            | MUC13_HUMAN          |
| Q9H3R2                                                                                                       | 2             | 3.4462           | K.ISVTVSETFDPEEK.H                 | 2            | MUC13_HUMAN          |
| <b><i>Mu-crystallin homolog - Homo sapiens (Human)</i></b>                                                   |               |                  |                                    |              |                      |
| Q14894                                                                                                       | 2             | 4.6018           | R.VPAFLSAAEVEEHLR.S                | 5            | CRYM_HUMAN           |
| Q14894                                                                                                       | 2             | 3.427            | R.GYLGVMPAYSAEDALTTK.L             | 2            | CRYM_HUMAN           |
| <b><i>Multimerin-2 precursor - Homo sapiens (Human)</i></b>                                                  |               |                  |                                    |              |                      |
| Q9H8L6                                                                                                       | 2             | 3.0953           | R.SISELQADVDTK.L                   | 2            | MMRN2_HUMAN          |
| Q9H8L6                                                                                                       | 2             | 4.9682           | R.SQVQALDDEVGALK.A                 | 4            | MMRN2_HUMAN          |
| Q9H8L6                                                                                                       | 2             | 2.8523           | R.ADFQELGAK.F                      | 1            | MMRN2_HUMAN          |
| Q9H8L6                                                                                                       | 4             | 6.2066           | R.QLDGSSLQALQNAVDAVSLAVDAHKAEGER.A | 3            | MMRN2_HUMAN          |
| Q9H8L6                                                                                                       | 2             | 2.9332           | R.VADSLPGLWK.A                     | 1            | MMRN2_HUMAN          |
| Q9H8L6                                                                                                       | 4             | 4.9357           | R.RQLDGSSLQALQNAVDAVSLAVDAHK.A     | 1            | MMRN2_HUMAN          |
| Q9H8L6                                                                                                       | 2             | 2.9313           | R.ALEETQVSLDERR.Q                  | 2            | MMRN2_HUMAN          |
| Q9H8L6                                                                                                       | 2             | 5.5139           | R.VALQDAASGLQEALGWDELAAR.V         | 2            | MMRN2_HUMAN          |
| Q9H8L6                                                                                                       | 3             | 5.3371           | R.HVDEIKELYSEDETDFDQISK.V          | 1            | MMRN2_HUMAN          |
| Q9H8L6                                                                                                       | 2             | 3.7747           | R.REEELQYTLEDMR.A                  | 2            | MMRN2_HUMAN          |
| <b><i>Multiple coagulation factor deficiency protein 2 precursor - Homo sapiens (Human)</i></b>              |               |                  |                                    |              |                      |
| Q8NI22                                                                                                       | 4             | 6.8103           | K.NTVHDQEHIMEHLEGVINKPEAEMSPQELQLH | 2            | MCFD2_HUMAN          |
| <b><i>Multiple myeloma tumor-associated protein 2 - Homo sapiens (Human)</i></b>                             |               |                  |                                    |              |                      |
| Q9BU76                                                                                                       | 2             | 3.6705           | R.VESGGPGTSAASAR.R                 | 1            | MMTA2_HUMAN          |
| <b><i>Multiple PDZ domain protein - Homo sapiens (Human)</i></b>                                             |               |                  |                                    |              |                      |
| O75970                                                                                                       | 2             | 3.1262           | K.NALASEIQGLR.T                    | 1            | MPDZ_HUMAN           |
| <b><i>Multisynthetase complex auxiliary component p43 [Contains: Endothelial monocyte-activating pol</i></b> |               |                  |                                    |              |                      |

| <i>Accession No*</i>                                                                             | <i>Charge</i> | <i>XC(Max)**</i> | <i>Peptide*</i>                    | <i>TC***</i> | <i>Reference No*</i> |
|--------------------------------------------------------------------------------------------------|---------------|------------------|------------------------------------|--------------|----------------------|
| Q12904                                                                                           | 2             | 4.2644           | K.GAEADQIIEYLK.Q                   | 6            | MCA1_HUMAN           |
| Q12904                                                                                           | 3             | 4.9996           | R.TVVSGLVNHPLEQMQR.M               | 3            | MCA1_HUMAN           |
| <b><i>Musculoskeletal embryonic nuclear protein 1 - Homo sapiens (Human)</i></b>                 |               |                  |                                    |              |                      |
| Q8IVN3                                                                                           | 2             | 3.3063           | R.TGTETVFEKPK.A                    | 1            | Q8IVN3_HUMAN         |
| <b><i>My020 protein - Homo sapiens (Human)</i></b>                                               |               |                  |                                    |              |                      |
| Q9H3K3                                                                                           | 3             | 4.1549           | R.DHSSQSEEEVVEGEKEVEALKK.S         | 1            | Q9H3K3_HUMAN         |
| <b><i>Myb-binding protein 1A - Homo sapiens (Human)</i></b>                                      |               |                  |                                    |              |                      |
| Q9BQG0                                                                                           | 2             | 3.6321           | R.DPAQPM#SPGEATQSGAR.P             | 3            | MBB1A_HUMAN          |
| Q9BQG0                                                                                           | 2             | 3.4104           | R.DPAQPMSPGEATQSGAR.P              | 2            | MBB1A_HUMAN          |
| <b><i>Myc box-dependent-interacting protein 1 - Homo sapiens (Human)</i></b>                     |               |                  |                                    |              |                      |
| O00499                                                                                           | 2             | 4.8012           | R.VNHEPEPAGGATPGATLPK.S            | 10           | BIN1_HUMAN           |
| O00499                                                                                           | 3             | 5.9672           | K.VQAQHDYTATDDELQLK.A              | 35           | BIN1_HUMAN           |
| O00499                                                                                           | 2             | 2.7873           | R.LDLPPGFMFK.V                     | 2            | BIN1_HUMAN           |
| O00499                                                                                           | 3             | 4.2323           | R.HHYESLQTA.K                      | 1            | BIN1_HUMAN           |
| O00499                                                                                           | 2             | 2.7903           | R.GVFPENFTEVP.-                    | 2            | BIN1_HUMAN           |
| O00499                                                                                           | 3             | 4.0305           | R.VGFYVNTFQSIAGLEENFHK.E           | 1            | BIN1_HUMAN           |
| O00499                                                                                           | 2             | 4.2782           | K.AGDVVLVIPFQNPEEQDEGLMGVK.E       | 3            | BIN1_HUMAN           |
| O00499                                                                                           | 2             | 2.9616           | K.ESDWNQHKLEK.C                    | 1            | BIN1_HUMAN           |
| O00499                                                                                           | 3             | 3.7638           | K.IAENNDLLWMDYHQK.L                | 1            | BIN1_HUMAN           |
| O00499                                                                                           | 2             | 4.1206           | K.SPSPDGS PAATPEIR.V               | 2            | BIN1_HUMAN           |
| O00499                                                                                           | 3             | 4.6104           | K.LVDQALLTMDTYLGQFPDIK.S           | 1            | BIN1_HUMAN           |
| <b><i>Myelin basic protein - Homo sapiens (Human)</i></b>                                        |               |                  |                                    |              |                      |
| P02686                                                                                           | 3             | 5.2336           | R.TTSEDNEVFGEADANQNNGTSSQDTAVTDSK  | 2            | MBP_HUMAN            |
| P02686                                                                                           | 3             | 4.7357           | K.DRPSEDELQTIQEDSAATSESLDVM#ASQK.R | 1            | MBP_HUMAN            |
| P02686                                                                                           | 2             | 2.961            | K.ASTNSETNRGESEK.K                 | 1            | MBP_HUMAN            |
| <b><i>Myelin expression factor 2 - Homo sapiens (Human)</i></b>                                  |               |                  |                                    |              |                      |
| Q9P2K5                                                                                           | 2             | 3.3174           | K.MENDESAKEEK.S                    | 2            | MYEF2_HUMAN          |
| Q9P2K5                                                                                           | 2             | 3.0675           | R.REPHPAEAEK.Q                     | 1            | MYEF2_HUMAN          |
| <b><i>Myelodysplastic syndrome 2 translocation associated protein - Homo sapiens (Human)</i></b> |               |                  |                                    |              |                      |
| Q8NDY4                                                                                           | 2             | 2.9975           | R.LSCSVLNSSPAM#RGGAR.G             | 1            | MDS2_HUMAN           |
| <b><i>MyoD family inhibitor domain-containing protein - Homo sapiens (Human)</i></b>             |               |                  |                                    |              |                      |
| Q9P1T7                                                                                           | 2             | 5.7517           | R.VAEAGGGQLGSTAQQK.C               | 2            | MDFIC_HUMAN          |
| <b><i>Myosin light chain kinase, smooth muscle - Homo sapiens (Human)</i></b>                    |               |                  |                                    |              |                      |

| <i>Accession No*</i>                                                            | <i>Charge</i> | <i>XC(Max)**</i> | <i>Peptide*</i>                  | <i>TC***</i> | <i>Reference No*</i> |
|---------------------------------------------------------------------------------|---------------|------------------|----------------------------------|--------------|----------------------|
| Q15746                                                                          | 2             | 2.8958           | K.FESKPQSQEVK.E                  | 2            | MYLK_HUMAN           |
| Q15746                                                                          | 3             | 3.8301           | K.TPVPEKVPPPKPATPDFR.S           | 1            | MYLK_HUMAN           |
| Q15746                                                                          | 3             | 4.4092           | K.TLSEDDLKEIPAEQMDFR.A           | 1            | MYLK_HUMAN           |
| Q15746                                                                          | 2             | 3.4681           | K.SSLPPVLGTESDATVK.K             | 3            | MYLK_HUMAN           |
| Q15746                                                                          | 3             | 4.952            | K.KKLPAENGSSSAETLNAK.A           | 1            | MYLK_HUMAN           |
| Q15746                                                                          | 2             | 3.1982           | R.GGSPPWAANSQPQPPR.E             | 2            | MYLK_HUMAN           |
| Q15746                                                                          | 2             | 4.17             | R.APGLGVLSPSGEER.K               | 3            | MYLK_HUMAN           |
| Q15746                                                                          | 3             | 4.3261           | K.AVESSKPLSNAQPSGPLKPVGNAK.P     | 1            | MYLK_HUMAN           |
| Q15746                                                                          | 2             | 2.8764           | K.VHSPQQVDFR.S                   | 3            | MYLK_HUMAN           |
| Q15746                                                                          | 3             | 3.9668           | K.PAETLKPMGNAKPDENLK.S           | 1            | MYLK_HUMAN           |
| <b><i>Myosin light polypeptide 3 - Homo sapiens (Human)</i></b>                 |               |                  |                                  |              |                      |
| P08590                                                                          | 2             | 4.3224           | R.ALGQNPTQAEVLR.V                | 3            | MYL3_HUMAN           |
| P08590                                                                          | 2             | 3.0215           | K.NKDTGTIEDFVEGLR.V              | 1            | MYL3_HUMAN           |
| <b><i>Myosin light polypeptide 4 - Homo sapiens (Human)</i></b>                 |               |                  |                                  |              |                      |
| P12829                                                                          | 3             | 4.3322           | R.NKEQGTIEDFVEGLR.V              | 1            | MYL4_HUMAN           |
| P12829                                                                          | 3             | 4.8079           | K.PAPAPAPAPAPAPAPAPEAPKEPAFDPK.S | 3            | MYL4_HUMAN           |
| <b><i>Myosin light polypeptide 6 - Homo sapiens (Human)</i></b>                 |               |                  |                                  |              |                      |
| P60660                                                                          | 2             | 2.8037           | K.EAFQLFDR.T                     | 3            | MYL6_HUMAN           |
| <b><i>Myosin light polypeptide 6B - Homo sapiens (Human)</i></b>                |               |                  |                                  |              |                      |
| P14649                                                                          | 2             | 3.4662           | R.GQGTYEDYLEGFR.V                | 2            | MYL6B_HUMAN          |
| P14649                                                                          | 2             | 3.5267           | K.TKAEPVPQAPQK.T                 | 2            | MYL6B_HUMAN          |
| P14649                                                                          | 3             | 4.6679           | K.PAAKPAAGAPPAK.T                | 1            | MYL6B_HUMAN          |
| P14649                                                                          | 2             | 2.8333           | K.PAAAGAPPAK.T                   | 1            | MYL6B_HUMAN          |
| P14649                                                                          | 2             | 3.1117           | R.HVLTTLGEK.M                    | 4            | MYL6B_HUMAN          |
| <b><i>Myosin phosphatase Rho-interacting protein - Homo sapiens (Human)</i></b> |               |                  |                                  |              |                      |
| Q6WCQ1                                                                          | 2             | 2.8909           | K.STLWQEEMR.T                    | 2            | MRIP_HUMAN           |
| Q6WCQ1                                                                          | 3             | 4.1629           | K.THNVHVEIEQR.W                  | 1            | MRIP_HUMAN           |
| Q6WCQ1                                                                          | 2             | 2.8769           | K.HWFVLADQSLR.Y                  | 1            | MRIP_HUMAN           |
| Q6WCQ1                                                                          | 2             | 3.3716           | R.FGMLDATDGPGTEDAALR.M           | 1            | MRIP_HUMAN           |
| Q6WCQ1                                                                          | 4             | 5.1833           | R.LSTHELTSLEKELEQSQKEASDLLEQNR.L | 1            | MRIP_HUMAN           |
| Q6WCQ1                                                                          | 3             | 4.7679           | R.TKDQPDGSSLSPAQSPSQSPPAASSLR.E  | 1            | MRIP_HUMAN           |
| Q6WCQ1                                                                          | 2             | 3.7893           | K.QEAEELGEPDPEQK.R               | 2            | MRIP_HUMAN           |
| <b><i>Myosin-10 - Homo sapiens (Human)</i></b>                                  |               |                  |                                  |              |                      |
| P35580                                                                          | 3             | 3.7509           | R.IAQLEEELEEEQSNM#ELLNDR.F       | 1            | MYH10_HUMAN          |

| <i>Accession No*</i> | <i>Charge</i> | <i>XC(Max)**</i> | <i>Peptide*</i>                 | <i>TC***</i> | <i>Reference No*</i> |
|----------------------|---------------|------------------|---------------------------------|--------------|----------------------|
| P35580               | 2             | 5.7014           | K.LQNELDNVSTLLEEA EK.K          | 5            | MYH10_HUMAN          |
| P35580               | 2             | 3.6285           | R.DLQTRDEQNEEK.K                | 3            | MYH10_HUMAN          |
| P35580               | 3             | 5.4642           | K.M#QAHIQDLEEQLDEEEGAR.Q        | 2            | MYH10_HUMAN          |
| P35580               | 2             | 2.9623           | R.ALEQQVEEM#R.T                 | 2            | MYH10_HUMAN          |
| P35580               | 2             | 4.7196           | R.ALEEALAEKEEFER.Q              | 5            | MYH10_HUMAN          |
| P35580               | 3             | 4.0672           | R.ADMEDLMSSKDDVGKNVHELEK.S      | 1            | MYH10_HUMAN          |
| P35580               | 2             | 3.7733           | K.SLEAEILQLQEELASSER.A          | 1            | MYH10_HUMAN          |
| P35580               | 3             | 5.1502           | K.MQAHIQDLEEQLDEEEGAR.Q         | 2            | MYH10_HUMAN          |
| P35580               | 3             | 4.7989           | R.HADQYKEQMEK.A                 | 3            | MYH10_HUMAN          |
| P35580               | 4             | 6.699            | R.DLSEELEALKTELEDTLDTTAAQQELR.T | 2            | MYH10_HUMAN          |
| P35580               | 3             | 3.9514           | R.KKLDAQVQELHAK.V               | 1            | MYH10_HUMAN          |
| P35580               | 3             | 4.1474           | K.ALEEEETKNHEAQIQDM#R.Q         | 4            | MYH10_HUMAN          |
| P35580               | 2             | 3.7012           | K.LLKDAEALSQR.L                 | 1            | MYH10_HUMAN          |
| P35580               | 3             | 3.9409           | R.IAQLEEELEEEQSNMELLNDRFR.K     | 1            | MYH10_HUMAN          |
| P35580               | 2             | 3.2586           | R.LQQELDDLTVDLDHQR.Q            | 1            | MYH10_HUMAN          |
| P35580               | 2             | 3.5743           | R.RGGPISFSSSR.S                 | 3            | MYH10_HUMAN          |
| P35580               | 3             | 4.9588           | R.QLEEEKNSLQEQEEEEEAR.K         | 1            | MYH10_HUMAN          |
| P35580               | 2             | 3.2277           | R.QLEEAEEEEATR.A                | 1            | MYH10_HUMAN          |
| P35580               | 2             | 4.9576           | R.NKQEVMSIDLEER.L               | 2            | MYH10_HUMAN          |
| P35580               | 2             | 2.7413           | R.LEVNMQAMK.A                   | 1            | MYH10_HUMAN          |
| P35580               | 2             | 4.9526           | R.ELDDATEANEGLSR.E              | 10           | MYH10_HUMAN          |
| P35580               | 2             | 2.9148           | K.ALAYDKLEK.T                   | 3            | MYH10_HUMAN          |
| P35580               | 2             | 4.5475           | K.ALEEEETKNHEAQIQDMR.Q          | 3            | MYH10_HUMAN          |
| P35580               | 3             | 4.9625           | R.QLEEEKNSLQEQEEEEEAR.N         | 2            | MYH10_HUMAN          |
| P35580               | 3             | 5.9865           | R.HAEQERDELADEITNSASGK.S        | 3            | MYH10_HUMAN          |
| P35580               | 2             | 3.2697           | R.ASRDEIFAQSK.E                 | 1            | MYH10_HUMAN          |
| P35580               | 3             | 5.3782           | K.MEIDLKDLEAQIEAANK.A           | 2            | MYH10_HUMAN          |
| P35580               | 2             | 2.9131           | R.ELEAELEDER.K                  | 1            | MYH10_HUMAN          |
| P35580               | 2             | 5.0679           | K.DAASLESQLQDTQELLQEETR.Q       | 1            | MYH10_HUMAN          |
| P35580               | 2             | 3.2963           | K.DAEALSQR.L                    | 2            | MYH10_HUMAN          |
| P35580               | 2             | 3.471            | K.DAEALSQRLEEK.A                | 2            | MYH10_HUMAN          |
| P35580               | 2             | 5.0052           | K.IGQLEEQLEQEAK.E               | 2            | MYH10_HUMAN          |
| P35580               | 2             | 4.5671           | K.IGQLEEQLEQEAKER.A             | 3            | MYH10_HUMAN          |
| P35580               | 3             | 3.9272           | K.KEEELQGALAR.G                 | 4            | MYH10_HUMAN          |
| P35580               | 2             | 2.7512           | R.GDDETLHK.N                    | 3            | MYH10_HUMAN          |
| P35580               | 3             | 4.8788           | R.HATALEELSEQLEQAKR.F           | 1            | MYH10_HUMAN          |
| P35580               | 3             | 5.3641           | K.KKVDDDLGTIESLEEA.K            | 2            | MYH10_HUMAN          |

| <i>Accession No*</i> | <i>Charge</i> | <i>XC(Max)**</i> | <i>Peptide*</i>                  | <i>TC***</i> | <i>Reference No*</i> |
|----------------------|---------------|------------------|----------------------------------|--------------|----------------------|
| P35580               | 2             | 4.6214           | R.ELQAQIAELQEDFESEK.A            | 4            | MYH10_HUMAN          |
| P35580               | 2             | 3.6062           | R.ELEAELEDERK.Q                  | 2            | MYH10_HUMAN          |
| P35580               | 2             | 2.8557           | R.GGPISFSSSR.S                   | 1            | MYH10_HUMAN          |
| P35580               | 3             | 5.4899           | K.LDGETTDLQDQIAELQAQIDELKLQLAK.K | 1            | MYH10_HUMAN          |
| P35580               | 2             | 5.5513           | K.KVDDDLGTIESLEEAK.K             | 2            | MYH10_HUMAN          |
| P35580               | 3             | 6.5792           | K.KMEIDLKDLEAQIEAANK.A           | 2            | MYH10_HUMAN          |
| P35580               | 3             | 4.3478           | K.KLDAQVQELHAK.V                 | 2            | MYH10_HUMAN          |

### ***Myosin-14 - Homo sapiens (Human)***

|        |   |        |                       |   |             |
|--------|---|--------|-----------------------|---|-------------|
| Q7Z406 | 2 | 3.7394 | R.EAQAALAEAQEDLESER.V | 1 | MYH14_HUMAN |
| Q7Z406 | 2 | 2.9249 | R.RGPLTFTTR.T         | 1 | MYH14_HUMAN |

### ***Myosin-9 - Homo sapiens (Human)***

|        |   |        |                             |   |            |
|--------|---|--------|-----------------------------|---|------------|
| P35579 | 2 | 3.7489 | K.THEAQIQEMR.Q              | 6 | MYH9_HUMAN |
| P35579 | 2 | 3.8309 | K.VEAQLQELQVK.F             | 2 | MYH9_HUMAN |
| P35579 | 2 | 3.1804 | K.DLEGLSQRHEEK.V            | 2 | MYH9_HUMAN |
| P35579 | 2 | 3.3344 | K.THEAQIQEM#R.Q             | 2 | MYH9_HUMAN |
| P35579 | 3 | 5.2761 | K.HSQAVEELAEQLEQTKR.V       | 2 | MYH9_HUMAN |
| P35579 | 3 | 4.248  | K.LTKDFSALSQLQDTQELLQEENR.Q | 1 | MYH9_HUMAN |
| P35579 | 2 | 3.2295 | K.DLEGLSQR.H                | 2 | MYH9_HUMAN |
| P35579 | 1 | 2.2387 | K.FNEGER.V                  | 1 | MYH9_HUMAN |
| P35579 | 2 | 3.9061 | K.HEAMITDLEER.L             | 2 | MYH9_HUMAN |
| P35579 | 3 | 5.3585 | K.NKHEAMITDLEER.L           | 4 | MYH9_HUMAN |
| P35579 | 2 | 3.5323 | K.QIATLHAQVADMK.K           | 3 | MYH9_HUMAN |
| P35579 | 2 | 4.5466 | R.IAEFTTNLTEEEKSK.S         | 5 | MYH9_HUMAN |
| P35579 | 3 | 4.4525 | K.DFSALSQLQDTQELLQEENR.Q    | 1 | MYH9_HUMAN |
| P35579 | 2 | 3.0246 | R.TELADKVTK.L               | 4 | MYH9_HUMAN |
| P35579 | 3 | 4.9417 | R.KKVEAQLQELQVK.F           | 3 | MYH9_HUMAN |
| P35579 | 2 | 5.3894 | K.KVEAQLQELQVK.F            | 2 | MYH9_HUMAN |
| P35579 | 1 | 2.1103 | K.VLLQGK.G                  | 1 | MYH9_HUMAN |
| P35579 | 3 | 6.9945 | K.TRLQQELDDLVDLDHQR.Q       | 3 | MYH9_HUMAN |
| P35579 | 2 | 6.5743 | K.HSQAVEELAEQLEQTK.R        | 1 | MYH9_HUMAN |
| P35579 | 2 | 3.0308 | K.VAAYDKLEK.T               | 1 | MYH9_HUMAN |
| P35579 | 3 | 5.8918 | K.IRELESQISELQEDLESER.A     | 3 | MYH9_HUMAN |
| P35579 | 3 | 6.4866 | K.TLEEEAKTHEAQIQEMR.Q       | 7 | MYH9_HUMAN |
| P35579 | 2 | 6.0262 | K.LQVELDNVTGLLSQSDSK.S      | 4 | MYH9_HUMAN |
| P35579 | 2 | 4.1018 | R.EQLEEEEEAKHNLEK.Q         | 2 | MYH9_HUMAN |
| P35579 | 3 | 4.8031 | K.TLEEEAKTHEAQIQEM#R.Q      | 6 | MYH9_HUMAN |

| <i>Accession No*</i>                                                               | <i>Charge</i> | <i>XC(Max)**</i> | <i>Peptide*</i>                   | <i>TC***</i> | <i>Reference No*</i> |
|------------------------------------------------------------------------------------|---------------|------------------|-----------------------------------|--------------|----------------------|
| P35579                                                                             | 2             | 3.7808           | K.QTLENERGELANEVK.V               | 3            | MYH9_HUMAN           |
| P35579                                                                             | 2             | 4.1683           | R.IAEFTTNLTEEEEEK.S               | 2            | MYH9_HUMAN           |
| P35579                                                                             | 3             | 5.1957           | R.ELESQISELQEDLESER.A             | 2            | MYH9_HUMAN           |
| P35579                                                                             | 2             | 4.9967           | K.AKQLENERGELANEVK.V              | 1            | MYH9_HUMAN           |
| <b><i>Myosin-Id - Homo sapiens (Human)</i></b>                                     |               |                  |                                   |              |                      |
| O94832                                                                             | 2             | 3.078            | R.LNQPPDFTK.N                     | 3            | MYO1D_HUMAN          |
| <b><i>Myosin-VI - Homo sapiens (Human)</i></b>                                     |               |                  |                                   |              |                      |
| Q9UM54                                                                             | 3             | 3.9202           | R.RIQEEMEKER.K                    | 2            | MYO6_HUMAN           |
| Q9UM54                                                                             | 2             | 2.8429           | K.FNEVSVLK.D                      | 2            | MYO6_HUMAN           |
| <b><i>Myosin-XVB - Homo sapiens (Human)</i></b>                                    |               |                  |                                   |              |                      |
| Q96JP2                                                                             | 2             | 3.6674           | K.EAEAEPAKETAAK.G                 | 4            | MO15B_HUMAN          |
| Q96JP2                                                                             | 2             | 2.8571           | K.APLQLGPSSSIK.E                  | 1            | MO15B_HUMAN          |
| Q96JP2                                                                             | 2             | 5.2043           | R.ASEAASQASPSAVTSKPR.K            | 2            | MO15B_HUMAN          |
| Q96JP2                                                                             | 2             | 3.9602           | R.ETSEEAEDRPYQPK.S                | 2            | MO15B_HUMAN          |
| Q96JP2                                                                             | 2             | 2.7106           | R.MGQPQITVR.T                     | 1            | MO15B_HUMAN          |
| Q96JP2                                                                             | 3             | 6.4226           | K.VHIPQGEAQEEEEEEEEEEQEEQEVETR.A  | 1            | MO15B_HUMAN          |
| <b><i>Myosin-XVIIIa - Homo sapiens (Human)</i></b>                                 |               |                  |                                   |              |                      |
| Q92614                                                                             | 3             | 4.7482           | R.RFDSELSQAHEEAQR.E               | 1            | MY18A_HUMAN          |
| Q92614                                                                             | 3             | 5.6424           | R.GSVILDSGHLSTASSDDLKGEEGSFR.G    | 2            | MY18A_HUMAN          |
| <b><i>Myotrophin - Homo sapiens (Human)</i></b>                                    |               |                  |                                   |              |                      |
| P58546                                                                             | 2             | 4.2671           | K.NGDLDEVKDYVAK.G                 | 4            | MTPN_HUMAN           |
| P58546                                                                             | 2             | 2.7346           | K.GADINAPDK.H                     | 1            | MTPN_HUMAN           |
| P58546                                                                             | 2             | 3.9147           | K.TVKGPDGLTAFEATDNQAIK.A          | 2            | MTPN_HUMAN           |
| P58546                                                                             | 3             | 5.3991           | K.NGDLDEVKDYVAKGEDVNR.T           | 7            | MTPN_HUMAN           |
| P58546                                                                             | 2             | 6.2077           | K.GPDGLTAFEATDNQAIK.A             | 15           | MTPN_HUMAN           |
| <b><i>Myristoylated alanine-rich C-kinase substrate - Homo sapiens (Human)</i></b> |               |                  |                                   |              |                      |
| P29966                                                                             | 2             | 5.201            | K.GEPAAAAPEAGASPVEK.E             | 3            | MARCS_HUMAN          |
| P29966                                                                             | 3             | 3.7427           | K.TAAKGAAAERPGEAAVASSPSK.A        | 1            | MARCS_HUMAN          |
| P29966                                                                             | 2             | 2.969            | K.AAEEPSKVEEK.K                   | 1            | MARCS_HUMAN          |
| P29966                                                                             | 2             | 3.9294           | K.AEDGATPSPNETPK.K                | 5            | MARCS_HUMAN          |
| P29966                                                                             | 2             | 5.4417           | K.EAGEGGEAEAPAAEGGK.D             | 5            | MARCS_HUMAN          |
| P29966                                                                             | 2             | 3.624            | K.VNGDASPAAESGAK.E                | 3            | MARCS_HUMAN          |
| P29966                                                                             | 3             | 4.3985           | K.EAPAEGEAAEPGSPTAAEGEASAASSTSSPK | 4            | MARCS_HUMAN          |
| P29966                                                                             | 3             | 6.4709           | K.EELQANGSAPAADKEEPAAGSGAASPSAAEK | 1            | MARCS_HUMAN          |

Accession No\* Charge XC(Max)\*\* Peptide\* TC\*\*\* Reference No\*

***N(G),N(G)-dimethylarginine dimethylaminohydrolase 1 - Homo sapiens (Human)***

|        |   |        |                                |   |             |
|--------|---|--------|--------------------------------|---|-------------|
| O94760 | 2 | 2.8598 | R.GAEILADTFK.D                 | 1 | DDAH1_HUMAN |
| O94760 | 3 | 3.9472 | K.LKDHMLIPVSM#SELEK.V          | 1 | DDAH1_HUMAN |
| O94760 | 2 | 3.6167 | K.IMQQMSDHRYDK.L               | 2 | DDAH1_HUMAN |
| O94760 | 2 | 4.3555 | K.LKDHMLIPVSMSELEK.V           | 3 | DDAH1_HUMAN |
| O94760 | 2 | 3.7685 | R.SAKGEEVDVAR.A                | 4 | DDAH1_HUMAN |
| O94760 | 2 | 3.6963 | R.TPEEYPESAK.V                 | 5 | DDAH1_HUMAN |
| O94760 | 3 | 4.8413 | K.LQLNIVEM#KDENATLDGGDVLFTGR.E | 1 | DDAH1_HUMAN |
| O94760 | 1 | 3.1924 | K.GEEVDVAR.A                   | 3 | DDAH1_HUMAN |
| O94760 | 2 | 3.6294 | R.ALPESLGQHALLR.S              | 4 | DDAH1_HUMAN |

***N-acetylglucosamine-6-sulfatase precursor - Homo sapiens (Human)***

|        |   |        |                   |   |           |
|--------|---|--------|-------------------|---|-----------|
| P15586 | 2 | 3.5481 | R.SDVLVEYQGEGR.N  | 2 | GNS_HUMAN |
| P15586 | 2 | 3.3669 | R.WQTLLSVDDLVEK.L | 2 | GNS_HUMAN |
| P15586 | 2 | 3.9249 | K.TQMDGMSLLPILR.G | 3 | GNS_HUMAN |
| P15586 | 2 | 3.6467 | K.IQEPNTFPAILR.S  | 2 | GNS_HUMAN |
| P15586 | 2 | 3.1228 | K.AFQNVFAPR.N     | 2 | GNS_HUMAN |

***N-acetyltransferase 12 - Homo sapiens (Human)***

|        |   |        |                   |   |              |
|--------|---|--------|-------------------|---|--------------|
| Q147X3 | 2 | 4.0601 | R.SPAGGESATVAAK.G | 1 | Q147X3_HUMAN |
|--------|---|--------|-------------------|---|--------------|

***N-acylneuraminate cytidyltransferase - Homo sapiens (Human)***

|        |   |        |                |   |            |
|--------|---|--------|----------------|---|------------|
| Q8NFW8 | 2 | 3.2356 | K.GAATSVSNPR.G | 2 | NEUA_HUMAN |
|--------|---|--------|----------------|---|------------|

***NAD(P) transhydrogenase, mitochondrial precursor - Homo sapiens (Human)***

|        |   |        |                   |   |            |
|--------|---|--------|-------------------|---|------------|
| Q13423 | 2 | 2.8477 | R.VALSPAGVQNLVK.Q | 2 | NNTM_HUMAN |
|--------|---|--------|-------------------|---|------------|

***NAD-dependent deacetylase sirtuin-1 - Homo sapiens (Human)***

|        |   |        |                  |   |             |
|--------|---|--------|------------------|---|-------------|
| Q96EB6 | 2 | 2.7541 | R.SPGEPPGAAPER.E | 1 | SIRT1_HUMAN |
|--------|---|--------|------------------|---|-------------|

***NADH dehydrogenase - Homo sapiens (Human)***

|        |   |        |                          |   |              |
|--------|---|--------|--------------------------|---|--------------|
| Q8WU60 | 2 | 3.7329 | R.KVASPSPSGSVLFTDEGVPK.F | 1 | Q8WU60_HUMAN |
| Q8WU60 | 1 | 2.9112 | R.SQVDEEFLK.Q            | 3 | Q8WU60_HUMAN |
| Q8WU60 | 2 | 4.406  | K.GSPAPAVLAEEAR.A        | 8 | Q8WU60_HUMAN |
| Q8WU60 | 2 | 4.0143 | K.LLATQTAAELSK.N         | 4 | Q8WU60_HUMAN |
| Q8WU60 | 2 | 3.0166 | K.TLVEFPQK.V             | 1 | Q8WU60_HUMAN |
| Q8WU60 | 2 | 5.1138 | K.VASPSPSGSVLFTDEGVPK.F  | 3 | Q8WU60_HUMAN |
| Q8WU60 | 2 | 4.8168 | R.KETSGTQGIIEGHLK.G      | 2 | Q8WU60_HUMAN |
| Q8WU60 | 2 | 4.2415 | R.GKLLATQTAAELSK.N       | 1 | Q8WU60_HUMAN |



| <i>Accession No*</i> | <i>Charge</i> | <i>XC(Max)**</i> | <i>Peptide*</i>                | <i>TC***</i> | <i>Reference No*</i> |
|----------------------|---------------|------------------|--------------------------------|--------------|----------------------|
| Q8WU60               | 2             | 4.2172           | R.GGTQEPAPVPAEPFDNTTYK.N       | 5            | Q8WU60_HUMAN         |
| Q8WU60               | 3             | 4.3201           | R.AEGQLQASPPGAAEGHLEKPVPEPQR.K | 2            | Q8WU60_HUMAN         |
| Q8WU60               | 3             | 4.5717           | R.LNEIDKESQKPFVEVK.G           | 9            | Q8WU60_HUMAN         |
| Q8WU60               | 2             | 3.8719           | K.NLSSPSSYPVAVNK.G             | 3            | Q8WU60_HUMAN         |

***NADH dehydrogenase [ubiquinone] 1 alpha subcomplex subunit 2 - Homo sapiens (Human)***

|        |   |        |                         |   |             |
|--------|---|--------|-------------------------|---|-------------|
| O43678 | 2 | 2.8436 | K.ANPDLPIILIR.E         | 1 | NDUA2_HUMAN |
| O43678 | 2 | 3.3953 | R.ALENVLSGKA.-          | 1 | NDUA2_HUMAN |
| O43678 | 2 | 5.1848 | R.YAFGQETNVLNFSADQVTR.A | 5 | NDUA2_HUMAN |

***NADH dehydrogenase [ubiquinone] 1 alpha subcomplex subunit 4 - Homo sapiens (Human)***

|        |   |        |                 |   |             |
|--------|---|--------|-----------------|---|-------------|
| O00483 | 2 | 3.0521 | K.LGPNDQYK.F    | 1 | NDUA4_HUMAN |
| O00483 | 2 | 3.3884 | K.FYSVNVVDYSK.L | 2 | NDUA4_HUMAN |

***NADH dehydrogenase [ubiquinone] 1 alpha subcomplex subunit 7 - Homo sapiens (Human)***

|        |   |        |                         |   |             |
|--------|---|--------|-------------------------|---|-------------|
| O95182 | 2 | 3.6505 | R.NWASGHDLQGK.L         | 1 | NDUA7_HUMAN |
| O95182 | 3 | 5.0765 | K.ALVSGKPAESSAVAATEK.K  | 5 | NDUA7_HUMAN |
| O95182 | 3 | 5.1657 | K.ALVSGKPAESSAVAATEKK.A | 6 | NDUA7_HUMAN |
| O95182 | 2 | 2.9682 | R.ESVPPSIIMSSQK.A       | 1 | NDUA7_HUMAN |
| O95182 | 2 | 3.6144 | K.PAESSAVAATEK.K        | 2 | NDUA7_HUMAN |
| O95182 | 1 | 2.148  | R.WELSSDQPYL.-          | 1 | NDUA7_HUMAN |

***NADH dehydrogenase [ubiquinone] 1 alpha subcomplex subunit 8 - Homo sapiens (Human)***

|        |   |        |                           |   |             |
|--------|---|--------|---------------------------|---|-------------|
| P51970 | 3 | 5.9669 | R.PRPDPSPEIEGDLQPATHGSR.F | 3 | NDUA8_HUMAN |
| P51970 | 3 | 4.1792 | K.TDRPLPENPYHSR.P         | 2 | NDUA8_HUMAN |

***NADH dehydrogenase [ubiquinone] 1 beta subcomplex subunit 10 - Homo sapiens (Human)***

|        |   |        |                 |   |             |
|--------|---|--------|-----------------|---|-------------|
| O96000 | 2 | 3.1723 | R.YQDLGAYSSAR.K | 1 | NDUBA_HUMAN |
|--------|---|--------|-----------------|---|-------------|

***NADH dehydrogenase [ubiquinone] flavoprotein 2, mitochondrial precursor - Homo sapiens (Hu)***

|        |   |        |                         |   |             |
|--------|---|--------|-------------------------|---|-------------|
| P19404 | 2 | 4.3684 | R.VYEVATFYTMYNR.K       | 1 | NDUV2_HUMAN |
| P19404 | 2 | 3.4125 | R.QNGWLPISAMNK.V        | 3 | NDUV2_HUMAN |
| P19404 | 2 | 2.9662 | K.VGETTPDK.L            | 1 | NDUV2_HUMAN |
| P19404 | 2 | 3.0635 | K.VAEVLQVPPMR.V         | 2 | NDUV2_HUMAN |
| P19404 | 2 | 3.4212 | R.DTPENNPDPFPDFTPENYK.R | 1 | NDUV2_HUMAN |
| P19404 | 2 | 4.1018 | K.AAAVLPLVLDLAQR.Q      | 5 | NDUV2_HUMAN |
| P19404 | 2 | 4.0266 | R.NSDSILEAIQKK.L        | 1 | NDUV2_HUMAN |

***NADH dehydrogenase [ubiquinone] flavoprotein 3, mitochondrial precursor - Homo sapiens (Hu)***

|        |   |        |                      |   |             |
|--------|---|--------|----------------------|---|-------------|
| P56181 | 2 | 4.1959 | K.KPAPVPAEPFDNTTYK.N | 4 | NDUV3_HUMAN |
|--------|---|--------|----------------------|---|-------------|

Accession No\* Charge XC(Max)\*\* Peptide\* TC\*\*\* Reference No\*

***NADH dehydrogenase [ubiquinone] iron-sulfur protein 3, mitochondrial precursor - Homo sapien***

O75489 2 3.5965 R.VVAEPVELAQEFR.K 2 NDUS3\_HUMAN

***NADH dehydrogenase [ubiquinone] iron-sulfur protein 4, mitochondrial precursor - Homo sapien***

O43181 2 2.7114 K.EDAVSFAEK.N 1 NDUS4\_HUMAN

O43181 2 3.0074 K.SYGANFSWNKR.T 4 NDUS4\_HUMAN

O43181 2 4.5103 K.LDITTLTGVPPEHIK.T 5 NDUS4\_HUMAN

O43181 2 3.617 K.SYGANFSWNK.R 7 NDUS4\_HUMAN

O43181 2 2.733 R.NNMQSGVNNTK.K 1 NDUS4\_HUMAN

O43181 2 3.5757 R.NNMQSGVNNTKK.W 9 NDUS4\_HUMAN

O43181 2 3.5659 R.NNM#QSGVNNTKK.W 4 NDUS4\_HUMAN

O43181 2 2.9959 K.NGWSYDIEER.K 2 NDUS4\_HUMAN

***NADH dehydrogenase [ubiquinone] iron-sulfur protein 5 - Homo sapiens (Human)***

O43920 2 3.3225 R.WLTIQSGEQPYK.M 1 NDUS5\_HUMAN

***NADH dehydrogenase [ubiquinone] iron-sulfur protein 6, mitochondrial precursor - Homo sapien***

O75380 2 3.7706 K.VYINLDKETK.T 4 NDUS6\_HUMAN

O75380 3 6.1551 R.QKEVNENFAIDLIAEQPVSEVETR.V 1 NDUS6\_HUMAN

***NADH dehydrogenase [ubiquinone] iron-sulfur protein 8, mitochondrial precursor - Homo sapien***

O00217 2 2.8734 K.YVNMQDPEMDMK.S 1 NDUS8\_HUMAN

***Nance-Horan syndrome protein - Homo sapiens (Human)***

Q6T4R5 2 5.2468 K.IIQYGGPDETLEQVQK.A 3 NHS\_HUMAN

Q6T4R5 2 3.1156 K.LPLDFANTPSR.M 2 NHS\_HUMAN

Q6T4R5 3 6.2042 K.VGAKPSAYEEGESFVGDHER.T 2 NHS\_HUMAN

Q6T4R5 2 4.8712 K.SPESESQTSQSESR.A 3 NHS\_HUMAN

***Nascent polypeptide-associated complex subunit alpha - Homo sapiens (Human)***

Q13765 2 3.7672 K.DIELVM#SQANVSR.A 1 NACA\_HUMAN

Q13765 2 4.804 K.IEDLSQQAQLAAAEK.F 3 NACA\_HUMAN

Q13765 2 4.0545 K.NNSNDIVNAIMELTM#.- 2 NACA\_HUMAN

Q13765 2 5.054 K.SPASDTYIVFGEAK.I 2 NACA\_HUMAN

Q13765 2 4.2553 R.ALKNNSNDIVNAIMELTM#.- 3 NACA\_HUMAN

Q13765 2 4.0204 R.ALKNNSNDIVNAIMELTM.- 3 NACA\_HUMAN

Q13765 2 4.7823 R.ALKNNSNDIVNAIM#ELTM#.- 5 NACA\_HUMAN

Q13765 2 3.0939 R.ALKNNSNDIVNAIM#ELTM.- 1 NACA\_HUMAN

***Nebulin - Homo sapiens (Human)***

| <i>Accession No*</i>                                                             | <i>Charge</i> | <i>XC(Max)**</i> | <i>Peptide*</i>         | <i>TC***</i> | <i>Reference No*</i> |
|----------------------------------------------------------------------------------|---------------|------------------|-------------------------|--------------|----------------------|
| P20929                                                                           | 1             | 2.1836           | K.EAYEKS.K              | 1            | NEBU_HUMAN           |
| <b><i>NEDD4-binding protein 1 - Homo sapiens (Human)</i></b>                     |               |                  |                         |              |                      |
| O75113                                                                           | 3             | 3.7682           | K.KTQAHTQQNMVEK.F       | 1            | N4BP1_HUMAN          |
| <b><i>NEDD4-like E3 ubiquitin-protein ligase WWP2 - Homo sapiens (Human)</i></b> |               |                  |                         |              |                      |
| O00308                                                                           | 2             | 2.8355           | R.DSSGTAVAPENR.H        | 1            | WWP2_HUMAN           |
| <b><i>NEDD8 precursor - Homo sapiens (Human)</i></b>                             |               |                  |                         |              |                      |
| Q15843                                                                           | 2             | 3.6991           | K.EIEIDIEPTDKVER.I      | 3            | NEDD8_HUMAN          |
| Q15843                                                                           | 2             | 3.5129           | R.VEEKEGIPPQQQR.L       | 4            | NEDD8_HUMAN          |
| Q15843                                                                           | 2             | 4.9909           | K.ILGGSVLHLVLALR.G      | 2            | NEDD8_HUMAN          |
| Q15843                                                                           | 2             | 5.0159           | K.TLTGKEIEIDIEPTDKVER.I | 8            | NEDD8_HUMAN          |
| <b><i>Negative elongation factor E - Homo sapiens (Human)</i></b>                |               |                  |                         |              |                      |
| P18615                                                                           | 2             | 4.1278           | K.SVWGLAVQNSPK.G        | 2            | NELFE_HUMAN          |
| <b><i>Neogenin precursor - Homo sapiens (Human)</i></b>                          |               |                  |                         |              |                      |
| Q92859                                                                           | 2             | 4.4122           | R.TFTPFYFLVEPVDLSVR.G   | 1            | NEO1_HUMAN           |
| <b><i>Nephrin precursor - Homo sapiens (Human)</i></b>                           |               |                  |                         |              |                      |
| O60500                                                                           | 2             | 2.7093           | R.LGEDEEDQSLDDM#EK.I    | 1            | NPHN_HUMAN           |
| <b><i>Nephronectin precursor - Homo sapiens (Human)</i></b>                      |               |                  |                         |              |                      |
| Q6UX19                                                                           | 2             | 2.8742           | R.VQTDPPQKPR.G          | 1            | NPNT_HUMAN           |
| Q6UX19                                                                           | 2             | 2.7191           | K.GFDLMYIGGK.Y          | 1            | NPNT_HUMAN           |
| Q6UX19                                                                           | 2             | 3.5084           | K.VM#IEPSGPIHVPK.G      | 1            | NPNT_HUMAN           |
| Q6UX19                                                                           | 2             | 2.8745           | R.QPSNDLFEIFEIER.G      | 1            | NPNT_HUMAN           |
| <b><i>Neprilysin - Homo sapiens (Human)</i></b>                                  |               |                  |                         |              |                      |
| P08473                                                                           | 2             | 3.2063           | R.FIM#DLVSSLSR.T        | 2            | NEP_HUMAN            |
| P08473                                                                           | 2             | 2.9194           | K.NSYMNPEKK.C           | 1            | NEP_HUMAN            |
| P08473                                                                           | 3             | 4.4216           | R.QEERLPIDENQLALEMKN.V  | 1            | NEP_HUMAN            |
| P08473                                                                           | 3             | 4.9174           | R.QEERLPIDENQLALEM#NK.V | 2            | NEP_HUMAN            |
| P08473                                                                           | 2             | 3.7121           | R.LPIDENQLALEMKN.V      | 1            | NEP_HUMAN            |
| P08473                                                                           | 2             | 3.0552           | R.IGYPDDIVSNDNK.L       | 1            | NEP_HUMAN            |
| P08473                                                                           | 3             | 4.4098           | K.DVLQEPKTEDIVAVQK.A    | 2            | NEP_HUMAN            |
| P08473                                                                           | 2             | 2.8845           | R.DLQNLMSWR.F           | 3            | NEP_HUMAN            |
| P08473                                                                           | 2             | 3.0401           | K.YGASWTAEK.A           | 2            | NEP_HUMAN            |
| P08473                                                                           | 2             | 3.7825           | K.TEDIVAVQK.A           | 3            | NEP_HUMAN            |
| P08473                                                                           | 2             | 3.6172           | K.HVVEDLIAQIR.E         | 1            | NEP_HUMAN            |

| <i>Accession No*</i> | <i>Charge</i> | <i>XC(Max)**</i> | <i>Peptide*</i>       | <i>TC***</i> | <i>Reference No*</i> |
|----------------------|---------------|------------------|-----------------------|--------------|----------------------|
| P08473               | 2             | 3.4662           | K.DGDLVDWWTQQSASNFK.E | 2            | NEP_HUMAN            |
| P08473               | 2             | 3.9115           | K.ALYGTTSETATWR.R     | 2            | NEP_HUMAN            |
| P08473               | 1             | 2.5274           | K.AIAQLNSK.Y          | 1            | NEP_HUMAN            |
| P08473               | 2             | 4.1355           | R.FIMDLVSSLSR.T       | 3            | NEP_HUMAN            |

***Nesprin-2 - Homo sapiens (Human)***

|        |   |        |                     |   |             |
|--------|---|--------|---------------------|---|-------------|
| Q8WXH0 | 2 | 2.7319 | R.TTEGEEETESR.V     | 1 | SYNE2_HUMAN |
| Q8WXH0 | 2 | 3.8383 | R.ASSSSGTIVQEAYGK.I | 2 | SYNE2_HUMAN |

***Nestin - Homo sapiens (Human)***

|        |   |        |                                    |   |            |
|--------|---|--------|------------------------------------|---|------------|
| P48681 | 2 | 2.8892 | K.GEYQESLR.S                       | 2 | NEST_HUMAN |
| P48681 | 3 | 5.5818 | R.NLEEEENLKGGEYQESLR.S             | 7 | NEST_HUMAN |
| P48681 | 4 | 4.958  | K.SQHVNGGVMNGLEQSEEVGQGMPVSEGD     | 1 | NEST_HUMAN |
| P48681 | 3 | 4.5803 | R.SLEEEGQELPQSADVQR.W              | 9 | NEST_HUMAN |
| P48681 | 3 | 4.4203 | K.EDTQTLQSLQKENQELM#K.S            | 2 | NEST_HUMAN |
| P48681 | 2 | 3.463  | K.DVEVVRPLEK.E                     | 1 | NEST_HUMAN |
| P48681 | 3 | 5.5904 | K.EIQEPLSVEVNQETFR.L               | 2 | NEST_HUMAN |
| P48681 | 2 | 3.4826 | K.EAVGQLKPTGK.E                    | 3 | NEST_HUMAN |
| P48681 | 2 | 3.3279 | R.NLEEEENLKG.G                     | 1 | NEST_HUMAN |
| P48681 | 1 | 2.2885 | K.ENQELMK.S                        | 1 | NEST_HUMAN |
| P48681 | 2 | 4.0737 | R.LLEEEENQESLR.S                   | 1 | NEST_HUMAN |
| P48681 | 2 | 4.3267 | K.SPETQAPLWTPPEINQGAMNPLEK.E       | 2 | NEST_HUMAN |
| P48681 | 3 | 5.2291 | R.WEDTVEKDQELAQESPPGM#AGVENEDEAEL  | 1 | NEST_HUMAN |
| P48681 | 2 | 3.1839 | R.SLEKENQEPLK.T                    | 2 | NEST_HUMAN |
| P48681 | 3 | 4.07   | K.EDTQTLQSLQKENQELMK.S             | 1 | NEST_HUMAN |
| P48681 | 3 | 4.1704 | K.ENQEPLRSPEVGDEEALRPLTK.E         | 1 | NEST_HUMAN |
| P48681 | 2 | 4.6453 | K.TSWAGAPVHLGQGQFLK.F              | 4 | NEST_HUMAN |
| P48681 | 2 | 3.8749 | R.GSPFQEEEGSALK.T                  | 5 | NEST_HUMAN |
| P48681 | 2 | 3.7808 | R.PLENENQEFLK.S                    | 1 | NEST_HUMAN |
| P48681 | 3 | 3.7821 | R.SLGEQDQMTLRPPEKVDLEPLK.S         | 1 | NEST_HUMAN |
| P48681 | 2 | 4.3699 | K.SLETEILESLEK.S                   | 7 | NEST_HUMAN |
| P48681 | 2 | 4.1281 | R.SLGAWNLENLR.S                    | 6 | NEST_HUMAN |
| P48681 | 2 | 4.449  | K.ELLKDVEVVRPLEK.E                 | 2 | NEST_HUMAN |
| P48681 | 3 | 5.3619 | K.EAVGQLKPTGKEDTQTLQSLQK.E         | 6 | NEST_HUMAN |
| P48681 | 2 | 3.394  | K.EDTQTLQSLQK.E                    | 2 | NEST_HUMAN |
| P48681 | 3 | 6.0988 | R.EDKVPGGLEIPSGM#EDAGPGADIIGVNGQGP | 1 | NEST_HUMAN |
| P48681 | 3 | 6.1519 | R.WEDTVEKDQELAQESPPGMAGVENEDEAELN  | 1 | NEST_HUMAN |
| P48681 | 2 | 2.8742 | K.SAGQENLETLK.S                    | 2 | NEST_HUMAN |

| <i>Accession No*</i> | <i>Charge</i> | <i>XC(Max)**</i> | <i>Peptide*</i>            | <i>TC***</i> | <i>Reference No*</i> |
|----------------------|---------------|------------------|----------------------------|--------------|----------------------|
| P48681               | 2             | 3.714            | R.SLEDENKEAFR.S            | 6            | NEST_HUMAN           |
| P48681               | 2             | 3.8241           | R.SLEEQDQETLR.T            | 3            | NEST_HUMAN           |
| P48681               | 2             | 3.613            | R.WDPTGEQRPPPQGETGK.E      | 1            | NEST_HUMAN           |
| P48681               | 2             | 3.6027           | R.SPEVGDDEEALRPLTK.E       | 2            | NEST_HUMAN           |
| P48681               | 2             | 3.5517           | R.SPEEVDKESQR.N            | 5            | NEST_HUMAN           |
| P48681               | 3             | 4.5841           | K.SLDQEIARPLENENQEFLK.S    | 4            | NEST_HUMAN           |
| P48681               | 3             | 5.0138           | R.SLGAWNLENLRSPEEVDKESQR.N | 2            | NEST_HUMAN           |
| P48681               | 3             | 4.2582           | K.SLKEESVEAVK.S            | 3            | NEST_HUMAN           |

***Netrin-4 precursor - Homo sapiens (Human)***

|        |   |        |               |   |            |
|--------|---|--------|---------------|---|------------|
| Q9HB63 | 2 | 3.2893 | R.MGNLALGR.K  | 2 | NET4_HUMAN |
| Q9HB63 | 2 | 2.765  | R.M#GNLALGR.K | 1 | NET4_HUMAN |

***Neudessin precursor - Homo sapiens (Human)***

|        |   |        |                                     |   |            |
|--------|---|--------|-------------------------------------|---|------------|
| Q9UMX5 | 3 | 4.8285 | R.ILNEDGSPNLDFKPEDQPHFDIKDEF.-      | 1 | NENF_HUMAN |
| Q9UMX5 | 2 | 2.885  | K.M#SLDPADLTHD TTGLTAK.E            | 1 | NENF_HUMAN |
| Q9UMX5 | 3 | 4.0494 | K.M#SLDPADLTHD TTGLTAKELEALDEVFTK.V | 2 | NENF_HUMAN |
| Q9UMX5 | 2 | 4.28   | K.GVVFDVTSKGFEYGR.G                 | 4 | NENF_HUMAN |
| Q9UMX5 | 1 | 3.4708 | K.GVVFDVTSKG.E                      | 5 | NENF_HUMAN |
| Q9UMX5 | 2 | 3.433  | K.ELEALDEVFTK.V                     | 4 | NENF_HUMAN |
| Q9UMX5 | 3 | 3.9295 | K.AKYPIVGYTAR.R                     | 2 | NENF_HUMAN |
| Q9UMX5 | 3 | 4.4732 | R.GPPVRLFTEEELAR.Y                  | 2 | NENF_HUMAN |
| Q9UMX5 | 2 | 3.9155 | R.GAPYNALTGKDSTR.G                  | 2 | NENF_HUMAN |
| Q9UMX5 | 2 | 3.0393 | K.YPIVGYTAR.R                       | 1 | NENF_HUMAN |
| Q9UMX5 | 4 | 5.7876 | K.MSLDPADLTHD TTGLTAKELEALDEVFTK.V  | 1 | NENF_HUMAN |
| Q9UMX5 | 1 | 2.3389 | R.GAPYNALTGK.D                      | 2 | NENF_HUMAN |
| Q9UMX5 | 2 | 4.1043 | R.YGEEEDQPIYLAVK.G                  | 2 | NENF_HUMAN |

***Neugrin - Homo sapiens (Human)***

|        |   |        |                           |   |            |
|--------|---|--------|---------------------------|---|------------|
| Q9NPE2 | 3 | 3.7789 | R.NKEIQDLEESFVPAAPLGHPR.E | 1 | NGRN_HUMAN |
|--------|---|--------|---------------------------|---|------------|

***Neurabin-2 - Homo sapiens (Human)***

|        |   |        |                                      |   |            |
|--------|---|--------|--------------------------------------|---|------------|
| Q96SB3 | 3 | 5.3804 | K.AQAAPKEKAAAVAPPER.G                | 3 | NEB2_HUMAN |
| Q96SB3 | 2 | 3.7449 | R.RVLEESELAR.K                       | 2 | NEB2_HUMAN |
| Q96SB3 | 3 | 4.2656 | K.HAVTEAEIQQLKR.K                    | 1 | NEB2_HUMAN |
| Q96SB3 | 2 | 3.0439 | R.KLQSLEQEK.G                        | 1 | NEB2_HUMAN |
| Q96SB3 | 3 | 3.8284 | R.LELFPVELEKDSEGLGISIIGM#GAGADM#GLEK | 1 | NEB2_HUMAN |
| Q96SB3 | 2 | 2.7177 | R.KLDVVVR.F                          | 1 | NEB2_HUMAN |

Accession No\* Charge XC(Max)\*\* Peptide\* TC\*\*\* Reference No\*

**Neural cell adhesion molecule L1 precursor - Homo sapiens (Human)**

|        |   |        |                                   |   |             |
|--------|---|--------|-----------------------------------|---|-------------|
| P32004 | 2 | 4.283  | R.WMDWNAPQVQYR.V                  | 2 | L1CAM_HUMAN |
| P32004 | 3 | 4.67   | K.YGPGESPSPVSETVVTPEAAPEKNPVDVK.G | 2 | L1CAM_HUMAN |
| P32004 | 2 | 4.3035 | K.WRPVDLAQVK.G                    | 8 | L1CAM_HUMAN |
| P32004 | 2 | 3.053  | R.LVVFPTDDISLK.C                  | 2 | L1CAM_HUMAN |

**Neural cell adhesion molecule L1-like protein precursor - Homo sapiens (Human)**

|        |   |        |                                     |   |            |
|--------|---|--------|-------------------------------------|---|------------|
| O00533 | 2 | 2.8842 | R.VM#TPAVYAPYDVK.V                  | 1 | CHL1_HUMAN |
| O00533 | 3 | 4.1631 | K.VIKVDKDTATLSWGLPK.K               | 2 | CHL1_HUMAN |
| O00533 | 2 | 3.1483 | R.VMTPAVYAPYDVK.V                   | 4 | CHL1_HUMAN |
| O00533 | 2 | 3.4312 | K.TTVILPLAPFVR.Y                    | 2 | CHL1_HUMAN |
| O00533 | 3 | 4.228  | R.DMQPTESADSLVEYEGGDHGLFSEDGSGFIGAY | 1 | CHL1_HUMAN |
| O00533 | 2 | 3.801  | K.SMEQNGPGLEYR.V                    | 2 | CHL1_HUMAN |

**Neural Wiskott-Aldrich syndrome protein - Homo sapiens (Human)**

|        |   |        |                                    |   |            |
|--------|---|--------|------------------------------------|---|------------|
| O00401 | 2 | 3.9048 | K.TGGVEAVKNELR.R                   | 1 | WASL_HUMAN |
| O00401 | 2 | 3.0682 | R.DALLDQIR.Q                       | 2 | WASL_HUMAN |
| O00401 | 3 | 3.8696 | K.SVADGQESTPPTPAPTSGIVGALMEVM#QK.R | 1 | WASL_HUMAN |
| O00401 | 1 | 2.5857 | K.VIYDFIEK.T                       | 1 | WASL_HUMAN |
| O00401 | 2 | 3.2451 | K.AALLDQIR.E                       | 2 | WASL_HUMAN |

**Neuroblast differentiation-associated protein AHNK - Homo sapiens (Human)**

|        |   |        |                                 |   |            |
|--------|---|--------|---------------------------------|---|------------|
| Q09666 | 2 | 3.3198 | K.FSM#PGFKGEGPEVDVK.L           | 3 | AHNK_HUMAN |
| Q09666 | 3 | 4.3152 | K.LKTDVDVSLPK.V                 | 2 | AHNK_HUMAN |
| Q09666 | 2 | 4.591  | K.M#DAEVPDVNIEGPDAL.L           | 5 | AHNK_HUMAN |
| Q09666 | 2 | 3.8783 | K.ISM#PDVDLHVK.G                | 4 | AHNK_HUMAN |
| Q09666 | 2 | 3.237  | K.GDMDVSVPK.V                   | 1 | AHNK_HUMAN |
| Q09666 | 3 | 4.6484 | K.ADIDVSGPSVDTDAPDLIDIEGPEGK.L  | 2 | AHNK_HUMAN |
| Q09666 | 1 | 2.4477 | K.ADLGVSGPK.V                   | 2 | AHNK_HUMAN |
| Q09666 | 3 | 4.4749 | K.ADVDSVSGPKM#DAEVPDVNIEGPDAL.L | 2 | AHNK_HUMAN |
| Q09666 | 2 | 3.5833 | K.ANVDISAPK.V                   | 5 | AHNK_HUMAN |
| Q09666 | 2 | 4.8649 | K.APDVEGQGLDWSLK.I              | 1 | AHNK_HUMAN |
| Q09666 | 2 | 3.8919 | K.ASLGSLEGEAEAEASSPK.G          | 1 | AHNK_HUMAN |
| Q09666 | 2 | 3.0474 | K.LKGDVDVSLPEVEGEMK.V           | 1 | AHNK_HUMAN |
| Q09666 | 2 | 3.1048 | K.FSMPGFKGEGPEVDMNLPK.A         | 1 | AHNK_HUMAN |
| Q09666 | 2 | 3.4218 | K.FSMPGFKGEGPEVDVK.L            | 3 | AHNK_HUMAN |
| Q09666 | 2 | 2.9735 | K.GNVDISAPK.I                   | 1 | AHNK_HUMAN |
| Q09666 | 2 | 2.8954 | K.GDM#DVSVPK.V                  | 1 | AHNK_HUMAN |

| <i>Accession No*</i> | <i>Charge</i> | <i>XC(Max)**</i> | <i>Peptide*</i>                    | <i>TC***</i> | <i>Reference No*</i> |
|----------------------|---------------|------------------|------------------------------------|--------------|----------------------|
| Q09666               | 2             | 3.935            | K.GSRVDIETPNLEGLTGPRL              | 3            | AHnk_HUMAN           |
| Q09666               | 2             | 2.9465           | K.GDVDVSVPK.V                      | 1            | AHnk_HUMAN           |
| Q09666               | 2             | 3.3711           | K.GEGPDVHMTLPK.G                   | 4            | AHnk_HUMAN           |
| Q09666               | 2             | 3.6151           | K.GEGPEFDVNLK.A                    | 2            | AHnk_HUMAN           |
| Q09666               | 2             | 2.7405           | K.GEGPEVDM#NLPK.A                  | 1            | AHnk_HUMAN           |
| Q09666               | 2             | 3.5348           | K.GEGPEVDMNLPK.A                   | 2            | AHnk_HUMAN           |
| Q09666               | 3             | 4.5984           | K.APDVEGQGLDWSLKIPK.M              | 2            | AHnk_HUMAN           |
| Q09666               | 2             | 2.9993           | K.IEGEMQVPDVIDRGP.V                | 1            | AHnk_HUMAN           |
| Q09666               | 1             | 2.1327           | K.GEGPEVDVK.L                      | 1            | AHnk_HUMAN           |
| Q09666               | 2             | 3.8352           | K.VEGEIKAPDVDIK.G                  | 2            | AHnk_HUMAN           |
| Q09666               | 2             | 3.2056           | K.ISMPDVLHMK.G                     | 1            | AHnk_HUMAN           |
| Q09666               | 2             | 3.5704           | K.FSM#PGFKAEGPEVDVNLK.A            | 2            | AHnk_HUMAN           |
| Q09666               | 3             | 4.3818           | K.M#DIDAPDVEVQGPDWHLK.M            | 1            | AHnk_HUMAN           |
| Q09666               | 2             | 4.4099           | K.GPNVKGEYDVTMPK.V                 | 3            | AHnk_HUMAN           |
| Q09666               | 2             | 5.263            | K.GPQITGPSLEGLGLK.G                | 5            | AHnk_HUMAN           |
| Q09666               | 2             | 5.2984           | K.GPTVGGGLPGIGVQGLEGLNQMGIK.S      | 2            | AHnk_HUMAN           |
| Q09666               | 2             | 3.7016           | K.FSMPGKAEGPEVDVNLK.A              | 2            | AHnk_HUMAN           |
| Q09666               | 3             | 6.0487           | K.GSLGATGEIKGPTVGGGLPGIGVQGLEGLNQM | 1            | AHnk_HUMAN           |
| Q09666               | 3             | 5.2121           | K.LKGPQITGPSLEGLGLK.G              | 7            | AHnk_HUMAN           |
| Q09666               | 2             | 4.4447           | K.IEGEMQVPDVIDR.G                  | 6            | AHnk_HUMAN           |
| Q09666               | 3             | 5.8419           | K.LKGDVDVSLPEVEGEMKVPDVIDK.G       | 1            | AHnk_HUMAN           |
| Q09666               | 2             | 2.7026           | K.ISIPDVGLHLK.G                    | 1            | AHnk_HUMAN           |
| Q09666               | 3             | 4.0137           | K.ISM#PDVLDLHMK.G                  | 2            | AHnk_HUMAN           |
| Q09666               | 2             | 5.4452           | K.GKGGVTGSPEASISGSK.G              | 5            | AHnk_HUMAN           |
| Q09666               | 2             | 4.7481           | K.ISM#QDVLDSLGSPLK.L               | 3            | AHnk_HUMAN           |
| Q09666               | 4             | 4.9173           | K.GHYEVTGSDDTGLKQSGVSLASK.K        | 2            | AHnk_HUMAN           |
| Q09666               | 2             | 2.9737           | K.ISMPDVLNLKGP.L                   | 3            | AHnk_HUMAN           |
| Q09666               | 2             | 3.138            | K.ISMPDVGLNLK.A                    | 2            | AHnk_HUMAN           |
| Q09666               | 2             | 4.9802           | K.ISMQDVLDSLGSPLK.L                | 4            | AHnk_HUMAN           |
| Q09666               | 3             | 3.7839           | K.LKGDVDVSLPEVEGEM#K.V             | 1            | AHnk_HUMAN           |
| Q09666               | 3             | 3.8777           | K.LKGDVDVSLPEVEGEM#KVPDVIDK.G      | 1            | AHnk_HUMAN           |
| Q09666               | 2             | 3.7736           | K.IEGEM#QVPDVIDR.G                 | 1            | AHnk_HUMAN           |
| Q09666               | 2             | 4.7387           | K.MDVNVGDIDIEGPEGK.L               | 5            | AHnk_HUMAN           |
| Q09666               | 2             | 4.582            | R.ISMSEVDLNVAAPK.V                 | 4            | AHnk_HUMAN           |
| Q09666               | 2             | 2.9013           | R.VSAPEVSVGHK.G                    | 1            | AHnk_HUMAN           |
| Q09666               | 3             | 4.6074           | K.VKGEYDVTVPK.L                    | 8            | AHnk_HUMAN           |
| Q09666               | 3             | 4.0284           | K.MKGDYDVTVPK.V                    | 2            | AHnk_HUMAN           |

| <i>Accession No*</i> | <i>Charge</i> | <i>XC(Max)**</i> | <i>Peptide*</i>                | <i>TC***</i> | <i>Reference No*</i> |
|----------------------|---------------|------------------|--------------------------------|--------------|----------------------|
| Q09666               | 2             | 4.1624           | K.VDINAPDVEVHGPDWHLK.M         | 3            | AHnk_HUMAN           |
| Q09666               | 3             | 4.2509           | K.VDIKAPDVEGQGLDWSLKIPK.M      | 2            | AHnk_HUMAN           |
| Q09666               | 2             | 4.284            | K.VDIDVPDVLNLEAPEGK.L          | 5            | AHnk_HUMAN           |
| Q09666               | 4             | 6.4503           | K.SKGHYEVTGSDDETGKLQSGVSLASK.K | 1            | AHnk_HUMAN           |
| Q09666               | 3             | 5.1893           | K.MPTFSTPGAKGEGPDVHMTLPK.G     | 2            | AHnk_HUMAN           |
| Q09666               | 2             | 4.6237           | R.ISM#SEVDLNVAAPK.V            | 4            | AHnk_HUMAN           |
| Q09666               | 2             | 3.7844           | K.MPEMSIKPQK.I                 | 2            | AHnk_HUMAN           |
| Q09666               | 3             | 5.4223           | K.VDIKAPDVEGQGLDWSLK.I         | 4            | AHnk_HUMAN           |
| Q09666               | 2             | 4.2236           | K.MDIDAPDVEVQGPDWHLK.M         | 3            | AHnk_HUMAN           |
| Q09666               | 2             | 2.91             | K.VKGEYDM#TVPK.L               | 2            | AHnk_HUMAN           |
| Q09666               | 2             | 3.5461           | K.MDAEVPDVNIEGPDAL.L           | 3            | AHnk_HUMAN           |
| Q09666               | 2             | 3.3323           | K.M#SLPDVLDLKGPK.M             | 1            | AHnk_HUMAN           |
| Q09666               | 3             | 4.5712           | K.M#KGDYDVTVPKVEGEIK.A         | 1            | AHnk_HUMAN           |
| Q09666               | 2             | 3.3031           | K.M#KGDYDVTVPK.V               | 1            | AHnk_HUMAN           |
| Q09666               | 2             | 3.4215           | K.VDVSAPDVEMQGPDWNLK.M         | 1            | AHnk_HUMAN           |
| Q09666               | 2             | 3.4129           | K.MPSMNIQTHK.I                 | 2            | AHnk_HUMAN           |
| Q09666               | 2             | 2.9916           | K.GEYDVTMPK.V                  | 2            | AHnk_HUMAN           |
| Q09666               | 2             | 4.2364           | K.VDVSAPDVEAHGPEWNLK.M         | 4            | AHnk_HUMAN           |
| Q09666               | 3             | 3.9599           | K.VEGEMKVPDVEIKGPK.M           | 2            | AHnk_HUMAN           |
| Q09666               | 1             | 3.4084           | K.GGVDVTLPR.V                  | 3            | AHnk_HUMAN           |
| Q09666               | 2             | 3.9096           | K.GGVTGSPEASISGSK.G            | 1            | AHnk_HUMAN           |
| Q09666               | 2             | 4.2891           | K.GGVTGSPEASISGSKGDLK.S        | 2            | AHnk_HUMAN           |
| Q09666               | 2             | 3.5775           | K.TDVDVSLPK.V                  | 1            | AHnk_HUMAN           |
| Q09666               | 2             | 3.9221           | K.VNVEAPDVNLEGLGGK.L           | 2            | AHnk_HUMAN           |
| Q09666               | 1             | 2.5487           | R.EVDVNLPK.A                   | 1            | AHnk_HUMAN           |
| Q09666               | 2             | 4.5596           | K.VESEIKVPDVELK.S              | 3            | AHnk_HUMAN           |
| Q09666               | 2             | 4.5828           | K.VGGSGVNVNAK.G                | 6            | AHnk_HUMAN           |
| Q09666               | 2             | 4.4907           | K.VGVEVPDVNIEGPEGK.L           | 5            | AHnk_HUMAN           |
| Q09666               | 3             | 4.0839           | K.VKGDM#DVSVPK.V               | 3            | AHnk_HUMAN           |
| Q09666               | 2             | 3.933            | K.VKGDMDVSVPK.V                | 11           | AHnk_HUMAN           |
| Q09666               | 3             | 4.3605           | K.M#DIDVPDVEVQGPDWHLK.M        | 2            | AHnk_HUMAN           |
| Q09666               | 2             | 4.592            | K.VKGEYDMTVPK.L                | 8            | AHnk_HUMAN           |
| Q09666               | 3             | 4.3368           | R.EFSGPSTPTGTLEFEGGEVSLEGGK.V  | 1            | AHnk_HUMAN           |
| Q09666               | 2             | 4.3105           | K.VEGEMKVPDVIK.G               | 2            | AHnk_HUMAN           |
| Q09666               | 2             | 3.7004           | K.FSMPSLKGEGPEVDVNLPK.A        | 1            | AHnk_HUMAN           |
| Q09666               | 2             | 4.4824           | K.VKGEYDVTVPKLEGLK.G           | 2            | AHnk_HUMAN           |
| Q09666               | 2             | 4.0793           | K.VKGDMDVSVPKVEGEMK.V          | 3            | AHnk_HUMAN           |



| <i>Accession No*</i>                                                                     | <i>Charge</i> | <i>XC(Max)**</i> | <i>Peptide*</i>                | <i>TC***</i> | <i>Reference No*</i> |
|------------------------------------------------------------------------------------------|---------------|------------------|--------------------------------|--------------|----------------------|
| Q09666                                                                                   | 2             | 2.8095           | K.VPDVEIKGPK.M                 | 1            | AHNK_HUMAN           |
| Q09666                                                                                   | 2             | 3.5452           | K.VSAPGVQGDVK.G                | 3            | AHNK_HUMAN           |
| Q09666                                                                                   | 2             | 2.8349           | K.VSMPDVDLNLK.G                | 1            | AHNK_HUMAN           |
| Q09666                                                                                   | 2             | 2.8111           | K.VSMPDVDLNLKGPK.L             | 1            | AHNK_HUMAN           |
| Q09666                                                                                   | 2             | 3.9133           | K.VKGDVDVSVPK.V                | 6            | AHNK_HUMAN           |
| <b><i>Neurofascin precursor - Homo sapiens (Human)</i></b>                               |               |                  |                                |              |                      |
| O94856                                                                                   | 2             | 2.9897           | K.YPGSVNSAVLR.L                | 1            | NFASC_HUMAN          |
| O94856                                                                                   | 2             | 3.199            | R.YVVGQTPVYVPYR.V              | 1            | NFASC_HUMAN          |
| <b><i>Neurogranin - Homo sapiens (Human)</i></b>                                         |               |                  |                                |              |                      |
| Q92686                                                                                   | 3             | 5.3185           | R.KGPGPGGGAGVAR.G              | 10           | NEUG_HUMAN           |
| <b><i>Neuron navigator 1 - Homo sapiens (Human)</i></b>                                  |               |                  |                                |              |                      |
| Q8NEY1                                                                                   | 2             | 3.4703           | K.TSLDVSNSAEPGLAPGAR.S         | 1            | NAV1_HUMAN           |
| <b><i>Neuron navigator 2 - Homo sapiens (Human)</i></b>                                  |               |                  |                                |              |                      |
| Q8IVL1                                                                                   | 3             | 5.1703           | R.RNPSPDVSDKSTSGK.K            | 2            | NAV2_HUMAN           |
| <b><i>Neuropeptide Y precursor [Contains: Neuropeptide Y - Homo sapiens (Human)]</i></b> |               |                  |                                |              |                      |
| P01303                                                                                   | 2             | 3.5239           | R.SSPETLISDLLM#R.E             | 2            | NPY_HUMAN            |
| <b><i>Neutral alpha-glucosidase AB precursor - Homo sapiens (Human)</i></b>              |               |                  |                                |              |                      |
| Q14697                                                                                   | 2             | 5.0825           | K.DPAEGDGAQEETPR.D             | 2            | GANAB_HUMAN          |
| Q14697                                                                                   | 2             | 3.6601           | R.WYQMGAYQPFR.A                | 2            | GANAB_HUMAN          |
| Q14697                                                                                   | 3             | 5.4408           | R.VSQGSKDPAEGDGAQEETPR.D       | 4            | GANAB_HUMAN          |
| <b><i>Neutral and basic amino acid transport protein rBAT - Homo sapiens (Human)</i></b> |               |                  |                                |              |                      |
| Q07837                                                                                   | 2             | 2.808            | R.DSIEM#SM#K.G                 | 1            | SLC31_HUMAN          |
| Q07837                                                                                   | 2             | 2.9383           | R.DSIEMSM#K.G                  | 1            | SLC31_HUMAN          |
| <b><i>NEXN protein - Homo sapiens (Human)</i></b>                                        |               |                  |                                |              |                      |
| Q7Z2X0                                                                                   | 2             | 3.7701           | K.RAEQEGDSSLITVVPVK.S          | 1            | Q7Z2X0_HUMAN         |
| <b><i>Next to BRCA1 gene 1 protein - Homo sapiens (Human)</i></b>                        |               |                  |                                |              |                      |
| Q14596                                                                                   | 3             | 4.6673           | R.GAEGKPGVEAGQEPAEAGER.L       | 2            | NBR1_HUMAN           |
| <b><i>NFATC2-interacting protein - Homo sapiens (Human)</i></b>                          |               |                  |                                |              |                      |
| Q8NCF5                                                                                   | 2             | 3.1146           | R.LVLDPGEAPLVPVYSGK.V          | 1            | NF2IP_HUMAN          |
| Q8NCF5                                                                                   | 2             | 3.443            | R.GAADEVEVEPEPPGPVSR.D         | 1            | NF2IP_HUMAN          |
| <b><i>NHS-like protein 1. - Homo sapiens (Human)</i></b>                                 |               |                  |                                |              |                      |
| Q5SYE7                                                                                   | 3             | 3.9749           | R.SPGAPSAGEAEARSPSTTLPDSSPSR.K | 1            | Q5SYE7_HUMAN         |

| <i>Accession No*</i>                                                       | <i>Charge</i> | <i>XC(Max)**</i> | <i>Peptide*</i>                      | <i>TC***</i> | <i>Reference No*</i> |
|----------------------------------------------------------------------------|---------------|------------------|--------------------------------------|--------------|----------------------|
| Q5SYE7                                                                     | 2             | 3.9169           | K.DFAVEPAENVSEALR.A                  | 1            | Q5SYE7_HUMAN         |
| Q5SYE7                                                                     | 3             | 6.8232           | K.ESSAAQAGSHATHPGTSLVLEGGAAAGSMSPSR. | 2            | Q5SYE7_HUMAN         |
| Q5SYE7                                                                     | 3             | 3.8664           | R.NHSPSPPVPTGAAPSLASP.K              | 1            | Q5SYE7_HUMAN         |
| Q5SYE7                                                                     | 2             | 3.3243           | R.PSPSTTLPDSSPSR.K                   | 1            | Q5SYE7_HUMAN         |
| <b><i>Niban protein - Homo sapiens (Human)</i></b>                         |               |                  |                                      |              |                      |
| Q9BZQ8                                                                     | 3             | 3.8538           | K.GESLSLPGSPPPDGTEQVIISR.V           | 1            | NIBA_HUMAN           |
| <b><i>Nibrin - Homo sapiens (Human)</i></b>                                |               |                  |                                      |              |                      |
| O60934                                                                     | 3             | 6.1506           | K.NKEQHLSSENEPVDTNSDNNLFTDLDL.S      | 2            | NBN_HUMAN            |
| <b><i>Nidogen-1 precursor - Homo sapiens (Human)</i></b>                   |               |                  |                                      |              |                      |
| P14543                                                                     | 2             | 4.4622           | K.VYYREDLSPSITQR.A                   | 3            | NID1_HUMAN           |
| P14543                                                                     | 2             | 2.84             | R.GGADTYSVPSVLSR.R                   | 1            | NID1_HUMAN           |
| <b><i>Ninjurin-1 - Homo sapiens (Human)</i></b>                            |               |                  |                                      |              |                      |
| Q92982                                                                     | 3             | 3.943            | K.SAAESMLDIALLMANASQLK.A             | 1            | NINJ1_HUMAN          |
| <b><i>Nipped-B-like protein - Homo sapiens (Human)</i></b>                 |               |                  |                                      |              |                      |
| Q6KC79                                                                     | 2             | 2.9144           | K.SDGHPEPTPK.Q                       | 1            | NIPBL_HUMAN          |
| Q6KC79                                                                     | 2             | 2.7384           | K.STPENHPETPK.K                      | 1            | NIPBL_HUMAN          |
| Q6KC79                                                                     | 2             | 4.1288           | R.VDSQASITQDSDSIK.K                  | 1            | NIPBL_HUMAN          |
| Q6KC79                                                                     | 2             | 2.834            | R.LSSDDGDSSTMR.N                     | 2            | NIPBL_HUMAN          |
| Q6KC79                                                                     | 2             | 3.9912           | K.VETQTEELKQNESR.T                   | 1            | NIPBL_HUMAN          |
| Q6KC79                                                                     | 2             | 3.4019           | R.DKDGNVTQETK.K                      | 4            | NIPBL_HUMAN          |
| <b><i>Nonhistone chromosomal protein HMG-14 - Homo sapiens (Human)</i></b> |               |                  |                                      |              |                      |
| P05114                                                                     | 3             | 4.6918           | K.EDLPAENGETKTEESPASDEAGEK.E         | 1            | HMG1_HUMAN           |
| P05114                                                                     | 2             | 3.9542           | K.TEESPASDEAGEKEAK.S                 | 4            | HMG1_HUMAN           |
| P05114                                                                     | 2             | 3.8687           | K.TEESPASDEAGEK.E                    | 3            | HMG1_HUMAN           |
| P05114                                                                     | 3             | 5.2139           | K.QAEVANQETKEDLPAENGETKTEESPASDEAG   | 2            | HMG1_HUMAN           |
| P05114                                                                     | 2             | 2.8131           | K.QAEVANQETKEDLPAENGETK.T            | 1            | HMG1_HUMAN           |
| P05114                                                                     | 3             | 5.6465           | K.GKQAEVANQETKEDLPAENGETK.T          | 2            | HMG1_HUMAN           |
| P05114                                                                     | 2             | 3.6323           | K.VSSAEGAAKEPK.R                     | 5            | HMG1_HUMAN           |
| P05114                                                                     | 2             | 2.866            | K.QAEVANQETK.E                       | 3            | HMG1_HUMAN           |
| <b><i>Nonhistone chromosomal protein HMG-17 - Homo sapiens (Human)</i></b> |               |                  |                                      |              |                      |
| P05204                                                                     | 2             | 3.2966           | K.EGNNPAENGDAK.T                     | 5            | HMG2_HUMAN           |
| P05204                                                                     | 2             | 2.8008           | K.EGNNPAENGDAKTDQAQK.A               | 1            | HMG2_HUMAN           |
| P05204                                                                     | 3             | 4.7446           | K.GKADAGKEGNNPAENGDAK.T              | 3            | HMG2_HUMAN           |

| <i>Accession No*</i>                                                                   | <i>Charge</i> | <i>XC(Max)**</i> | <i>Peptide*</i>             | <i>TC***</i> | <i>Reference No*</i> |
|----------------------------------------------------------------------------------------|---------------|------------------|-----------------------------|--------------|----------------------|
| P05204                                                                                 | 3             | 5.1252           | K.TDQAQKAEGAGDAK.-          | 20           | HMG2_HUMAN           |
| P05204                                                                                 | 2             | 3.7549           | K.ADAGKEGNNPAENGDAK.T       | 2            | HMG2_HUMAN           |
| <b><i>Non-POU domain-containing octamer-binding protein - Homo sapiens (Human)</i></b> |               |                  |                             |              |                      |
| Q15233                                                                                 | 2             | 2.908            | R.RQQEEMMR.R                | 2            | NONO_HUMAN           |
| Q15233                                                                                 | 2             | 4.5567           | R.MGQMAMGGAMGINNR.G         | 2            | NONO_HUMAN           |
| Q15233                                                                                 | 2             | 3.8916           | R.MGQM#AMGGAMGINNR.G        | 1            | NONO_HUMAN           |
| Q15233                                                                                 | 3             | 4.4403           | R.FGQAATMEGIGAIGGTPPAFNR.A  | 4            | NONO_HUMAN           |
| Q15233                                                                                 | 2             | 4.8702           | R.FGQAATM#EGIGAIGGTPPAFNR.A | 6            | NONO_HUMAN           |
| Q15233                                                                                 | 2             | 3.2565           | R.FAQPGSFEYAYMR.W           | 1            | NONO_HUMAN           |
| <b><i>Nonsecretory ribonuclease precursor - Homo sapiens (Human)</i></b>               |               |                  |                             |              |                      |
| P10153                                                                                 | 3             | 4.7381           | R.RDPPQYPVVPVHLDR.I         | 3            | RNAS2_HUMAN          |
| <b><i>Nonspecific lipid-transfer protein - Homo sapiens (Human)</i></b>                |               |                  |                             |              |                      |
| P22307                                                                                 | 2             | 4.4447           | K.KLEEEGEQFVK.I             | 2            | NLTP_HUMAN           |
| P22307                                                                                 | 2             | 4.6399           | K.KLEEEGEQFVK.K             | 3            | NLTP_HUMAN           |
| P22307                                                                                 | 2             | 3.3127           | K.ANLVFKEIEK.K              | 2            | NLTP_HUMAN           |
| P22307                                                                                 | 2             | 3.0216           | K.KIGGIFAFK.V               | 1            | NLTP_HUMAN           |
| P22307                                                                                 | 2             | 3.0183           | K.LEEEGEQFVK.I              | 1            | NLTP_HUMAN           |
| P22307                                                                                 | 2             | 2.706            | K.MNPQSAFFQGL.L             | 1            | NLTP_HUMAN           |
| P22307                                                                                 | 2             | 4.362            | K.LQNLQLQPGNAK.L-           | 3            | NLTP_HUMAN           |
| P22307                                                                                 | 2             | 3.8115           | K.M#NPQSAFFQGL.L            | 4            | NLTP_HUMAN           |
| P22307                                                                                 | 2             | 2.7242           | K.ITGNMGLAM#K.L             | 1            | NLTP_HUMAN           |
| P22307                                                                                 | 2             | 3.425            | K.IGGIFAFK.V                | 7            | NLTP_HUMAN           |
| P22307                                                                                 | 2             | 4.5441           | K.LQNLQLQPGNAK.L            | 4            | NLTP_HUMAN           |
| <b><i>Novel protein - Homo sapiens (Human)</i></b>                                     |               |                  |                             |              |                      |
| Q5T992                                                                                 | 2             | 3.3219           | R.GGADSSDSQDSQDM#DAYVPR.H   | 2            | Q5T992_HUMAN         |
| Q5T992                                                                                 | 3             | 3.8842           | K.KPVWEEELR.M               | 2            | Q5T992_HUMAN         |
| <b><i>Novel protein containing a DnaJ domain - Homo sapiens (Human)</i></b>            |               |                  |                             |              |                      |
| Q9H1X3                                                                                 | 2             | 2.8883           | K.EEIRDEEENIINK.S           | 1            | Q9H1X3_HUMAN         |
| <b><i>NSFL1 cofactor p47 - Homo sapiens (Human)</i></b>                                |               |                  |                             |              |                      |
| Q9UNZ2                                                                                 | 2             | 3.8237           | K.SPNELVDDLK.F              | 4            | NSF1C_HUMAN          |
| Q9UNZ2                                                                                 | 2             | 2.943            | R.SGQQIVGPPR.K              | 1            | NSF1C_HUMAN          |
| Q9UNZ2                                                                                 | 1             | 2.2414           | R.FYAGGSR.S                 | 2            | NSF1C_HUMAN          |
| Q9UNZ2                                                                                 | 2             | 5.6899           | R.DLIHQDEDEEEEGQR.F         | 7            | NSF1C_HUMAN          |

Accession No\* Charge XC(Max)\*\* Peptide\* TC\*\*\* Reference No\*

***N-terminal acetyltransferase complex ARD1 subunit homolog A - Homo sapiens (Human)***

P41227 2 3.5447 K.GLAAEDSGGDSK.D 4 ARD1A\_HUMAN

***N-terminal kinase-like protein - Homo sapiens (Human)***

Q96KG9 3 5.4419 R.PSTQPRPDSWGEDNWEGLETDSR.Q 2 NTKL\_HUMAN

Q96KG9 3 5.1967 R.LASEYNWGGPESSDKGDPFATLSAR.P 2 NTKL\_HUMAN

***Nuclear autoantigen Sp-100 - Homo sapiens (Human)***

P23497 3 4.1363 R.NKVEISNAIKK.T 1 SP100\_HUMAN

P23497 2 3.0195 R.MFTEDQGVDDR.L 2 SP100\_HUMAN

P23497 3 4.4159 R.VIGQDHDFSESSEEEAPAEASSGALR.S 1 SP100\_HUMAN

P23497 2 3.4939 R.VVYNVLSLEK.T 2 SP100\_HUMAN

P23497 2 3.856 R.SGLQLSLEQGTGENSFR.S 1 SP100\_HUMAN

***Nuclear distribution protein nudE homolog 1 - Homo sapiens (Human)***

Q9NXR1 3 4.461 R.NAFLESELDEKENLLESVQR.L 1 NDE1\_HUMAN

***Nuclear factor 1 C-type - Homo sapiens (Human)***

P08651 2 4.1326 R.RTLPSTSSSGSK.R 2 NFIC\_HUMAN

***Nuclear factor NF-kappa-B p100 subunit - Homo sapiens (Human)***

Q00653 2 3.4712 R.DSGEEAAEPSAPSR.T 4 NFKB2\_HUMAN

***Nuclear fragile X mental retardation-interacting protein 2 - Homo sapiens (Human)***

Q7Z417 2 3.8126 K.GADNDGSGSESGYTPK.K 4 NUF2\_HUMAN

Q7Z417 2 3.431 R.VLNGNQVVDTSK.Q 1 NUF2\_HUMAN

Q7Z417 2 4.665 K.NLSSDEATNPISR.V 2 NUF2\_HUMAN

Q7Z417 3 4.547 K.EDSWTLFKPPVFPVDNSSAK.I 1 NUF2\_HUMAN

Q7Z417 2 3.4579 K.IM#QQETSVPTLK.Q 1 NUF2\_HUMAN

Q7Z417 3 5.6552 K.VM#EVTFQGEYPATLVSQGAIEIIPSGTEHPVFP 4 NUF2\_HUMAN

Q7Z417 2 2.8489 R.TSPQVLGSILK.S 1 NUF2\_HUMAN

Q7Z417 2 3.4846 K.ADTSSQGALVFLSK.D 2 NUF2\_HUMAN

***Nuclear mitotic apparatus protein 1 - Homo sapiens (Human)***

Q14980 2 3.1548 R.QFLEVELDQAR.E 1 NUMA1\_HUMAN

Q14980 2 2.7464 K.EVAEKQEATR.Q 1 NUMA1\_HUMAN

Q14980 2 4.5157 R.AALMESQGQQEER.G 1 NUMA1\_HUMAN

Q14980 2 3.3151 K.LADDLSTLQEK.M 2 NUMA1\_HUMAN

Q14980 2 6.1129 K.LEILQQQLQVANEAR.D 5 NUMA1\_HUMAN

Q14980 3 4.6504 K.QAQLAQLTQQEQASQGLR.H 3 NUMA1\_HUMAN

| <i>Accession No*</i> | <i>Charge</i> | <i>XC(Max)**</i> | <i>Peptide*</i>           | <i>TC***</i> | <i>Reference No*</i> |
|----------------------|---------------|------------------|---------------------------|--------------|----------------------|
| Q14980               | 2             | 2.8266           | K.RLVMAESEK.S             | 1            | NUMA1_HUMAN          |
| Q14980               | 2             | 2.869            | K.YVQELAAVR.A             | 1            | NUMA1_HUMAN          |
| Q14980               | 3             | 5.3112           | K.KEKEHASGSGAQSEAAGR.T    | 1            | NUMA1_HUMAN          |
| Q14980               | 2             | 5.0289           | R.VAQEKDQLQEQLQALK.E      | 2            | NUMA1_HUMAN          |
| Q14980               | 2             | 3.0625           | K.ASYAEQLSMLK.K           | 2            | NUMA1_HUMAN          |
| Q14980               | 2             | 2.7868           | R.SLVEQHKR.E              | 1            | NUMA1_HUMAN          |
| Q14980               | 3             | 3.9499           | R.QELTSQAERAEELGQELK.A    | 1            | NUMA1_HUMAN          |
| Q14980               | 3             | 4.7953           | R.VAQEKDQLQEQLQALKESLK.V  | 2            | NUMA1_HUMAN          |
| Q14980               | 2             | 4.0158           | R.AALM#ESQGGQQEER.G       | 2            | NUMA1_HUMAN          |
| Q14980               | 3             | 3.7551           | R.KNSLISSLEEEVSILNR.Q     | 1            | NUMA1_HUMAN          |
| Q14980               | 3             | 4.1153           | R.DAALKQLEALEKEK.A        | 2            | NUMA1_HUMAN          |
| Q14980               | 2             | 4.5437           | R.DSALETLQGGQLEEK.A       | 1            | NUMA1_HUMAN          |
| Q14980               | 2             | 4.588            | R.DSAQTSVTQAQR.E          | 5            | NUMA1_HUMAN          |
| Q14980               | 2             | 3.1292           | R.EAEQMGNELER.L           | 2            | NUMA1_HUMAN          |
| Q14980               | 2             | 2.7239           | R.ELGELIPLR.Q             | 1            | NUMA1_HUMAN          |
| Q14980               | 3             | 6.8049           | K.EKQAQLAQTLLQQEQASQGLR.H | 2            | NUMA1_HUMAN          |
| Q14980               | 3             | 3.8482           | R.HREELEQSK.Q             | 1            | NUMA1_HUMAN          |
| Q14980               | 2             | 2.9735           | R.HQVEQLSSSLK.Q           | 3            | NUMA1_HUMAN          |
| Q14980               | 2             | 4.16             | R.LLQAETASNSAR.A          | 5            | NUMA1_HUMAN          |
| Q14980               | 2             | 3.2786           | K.AHGLLAEENR.G            | 1            | NUMA1_HUMAN          |
| Q14980               | 3             | 4.0289           | K.AQELGHSQSALASAQR.E      | 2            | NUMA1_HUMAN          |
| Q14980               | 2             | 2.7418           | K.ARQELQEAK.E             | 1            | NUMA1_HUMAN          |
| Q14980               | 3             | 5.2424           | K.EKEHASGSGAQSEAAGR.T     | 2            | NUMA1_HUMAN          |
| Q14980               | 3             | 4.084            | R.AGDRQPEWLEEQQGR.Q       | 1            | NUMA1_HUMAN          |

***Nuclear pore complex protein Nup153 - Homo sapiens (Human)***

|        |   |        |                           |   |             |
|--------|---|--------|---------------------------|---|-------------|
| P49790 | 2 | 4.058  | K.GGFSGNVEPASLPSASVFLGR.T | 3 | NU153_HUMAN |
| P49790 | 3 | 4.3786 | R.TEEKQQEPVTSTSLVFGK.K    | 2 | NU153_HUMAN |
| P49790 | 2 | 4.2378 | K.GFDTSSSSNSAASSSFK.F     | 1 | NU153_HUMAN |
| P49790 | 2 | 2.9682 | K.SPGFASPK.I              | 2 | NU153_HUMAN |
| P49790 | 2 | 3.941  | K.SSFNLGTIETK.S           | 3 | NU153_HUMAN |
| P49790 | 2 | 3.2103 | K.NTSLPPLWSPEAER.S        | 1 | NU153_HUMAN |

***Nuclear pore complex protein Nup93 - Homo sapiens (Human)***

|        |   |        |                 |   |             |
|--------|---|--------|-----------------|---|-------------|
| Q8N1F7 | 2 | 3.4212 | R.NLQEIQQAGER.L | 2 | NUP93_HUMAN |
| Q8N1F7 | 2 | 2.7775 | R.TSQETADVK.A   | 1 | NUP93_HUMAN |

***Nuclear pore complex protein Nup98-Nup96 precursor [Contains: Nuclear pore complex protein N***

| <i>Accession No*</i>                                                                                  | <i>Charge</i> | <i>XC(Max)**</i> | <i>Peptide*</i>                       | <i>TC***</i> | <i>Reference No*</i> |
|-------------------------------------------------------------------------------------------------------|---------------|------------------|---------------------------------------|--------------|----------------------|
| P52948                                                                                                | 2             | 3.4747           | K.ASLLTDEEDVDM#ALDQR.F                | 2            | NUP98_HUMAN          |
| P52948                                                                                                | 3             | 4.4306           | K.ASLLTDEEDVDMALDQR.F                 | 2            | NUP98_HUMAN          |
| P52948                                                                                                | 2             | 3.6828           | K.NLNNSNLFSPVNR.D                     | 2            | NUP98_HUMAN          |
| P52948                                                                                                | 3             | 5.1063           | K.YGLQDSDEEEEEHPSK.T                  | 2            | NUP98_HUMAN          |
| P52948                                                                                                | 2             | 4.4318           | R.DSENLASPSEYPENGER.F                 | 2            | NUP98_HUMAN          |
| P52948                                                                                                | 2             | 3.004            | R.LADINYEGR.L                         | 1            | NUP98_HUMAN          |
| <b><i>Nuclear pore glycoprotein p62 - Homo sapiens (Human)</i></b>                                    |               |                  |                                       |              |                      |
| P37198                                                                                                | 2             | 3.1305           | K.LAENIDAQLKR.M                       | 2            | NUP62_HUMAN          |
| P37198                                                                                                | 2             | 4.2362           | R.HFLQQATQVNAWDR.T                    | 1            | NUP62_HUMAN          |
| <b><i>Nuclear protein Hcc-1 - Homo sapiens (Human)</i></b>                                            |               |                  |                                       |              |                      |
| P82979                                                                                                | 2             | 2.8977           | R.FNVPVSLESK.K                        | 2            | HCC1_HUMAN           |
| P82979                                                                                                | 2             | 3.1404           | K.SEDDEKLK.K                          | 12           | HCC1_HUMAN           |
| P82979                                                                                                | 2             | 3.5901           | K.ITSEIPQTER.M                        | 5            | HCC1_HUMAN           |
| P82979                                                                                                | 4             | 7.9346           | R.LQAYLEEHAEEEEANEEEDVLGDETEEEETKPIEL | 1            | HCC1_HUMAN           |
| P82979                                                                                                | 2             | 3.7946           | K.GLSSDNKPM#VNLDK.L                   | 1            | HCC1_HUMAN           |
| <b><i>Nuclear protein localization protein 4 homolog - Homo sapiens (Human)</i></b>                   |               |                  |                                       |              |                      |
| Q8TAT6                                                                                                | 2             | 3.2647           | K.TGEITASSNK.S                        | 1            | NPL4_HUMAN           |
| <b><i>Nuclear receptor coactivator 2 - Homo sapiens (Human)</i></b>                                   |               |                  |                                       |              |                      |
| Q15596                                                                                                | 2             | 2.9783           | K.DLSQESSSTAPGSEVTIK.Q                | 2            | NCOA2_HUMAN          |
| <b><i>Nuclear receptor coactivator 3 - Homo sapiens (Human)</i></b>                                   |               |                  |                                       |              |                      |
| Q9Y6Q9                                                                                                | 2             | 3.0194           | K.ESSVEGAENQR.G                       | 1            | NCOA3_HUMAN          |
| <b><i>Nuclear receptor coactivator 5 - Homo sapiens (Human)</i></b>                                   |               |                  |                                       |              |                      |
| Q9HCD5                                                                                                | 3             | 3.7804           | K.TQPSSQPLQSGQVLPSATPTPSAPPTSQQELQ    | 1            | NCOA5_HUMAN          |
| <b><i>Nuclear receptor corepressor 2 - Homo sapiens (Human)</i></b>                                   |               |                  |                                       |              |                      |
| Q9Y618                                                                                                | 3             | 6.3073           | K.GKDAEAAEATAEGALKAEK.K               | 2            | NCOR2_HUMAN          |
| <b><i>Nuclear receptor interacting protein 2 - Homo sapiens (Human)</i></b>                           |               |                  |                                       |              |                      |
| A2RRE3                                                                                                | 2             | 3.139            | R.TRGQEAQLR.D                         | 2            | A2RRE3_HUMAN         |
| <b><i>Nuclear transcription factor Y subunit alpha - Homo sapiens (Human)</i></b>                     |               |                  |                                       |              |                      |
| P23511                                                                                                | 2             | 4.6834           | R.IPLPGAEMLEEEPLYVNAK.Q               | 1            | NFYA_HUMAN           |
| P23511                                                                                                | 3             | 5.1412           | K.EKDSPHMQDPNQADEEAMTQIIR.V           | 1            | NFYA_HUMAN           |
| P23511                                                                                                | 2             | 3.5491           | R.IPLPGAEM#LEEEPLYVNAK.Q              | 2            | NFYA_HUMAN           |
| <b><i>Nuclear ubiquitous casein and cyclin-dependent kinases substrate - Homo sapiens (Human)</i></b> |               |                  |                                       |              |                      |

| <i>Accession No*</i> | <i>Charge</i> | <i>XC(Max)**</i> | <i>Peptide*</i>                 | <i>TC***</i> | <i>Reference No*</i> |
|----------------------|---------------|------------------|---------------------------------|--------------|----------------------|
| Q9H1E3               | 2             | 4.4582           | K.NSQESEDSEDKDVK.T              | 5            | NUCKS_HUMAN          |
| Q9H1E3               | 1             | 2.1684           | K.ATVTPSPVK.G                   | 2            | NUCKS_HUMAN          |
| Q9H1E3               | 3             | 4.5147           | R.SGKNSQESEDSEDKDVK.T           | 5            | NUCKS_HUMAN          |
| Q9H1E3               | 2             | 2.7793           | K.EEDEEPESPPEK.K                | 1            | NUCKS_HUMAN          |
| Q9H1E3               | 3             | 6.5327           | R.KVVDYSQFQESDDADEDYGRDSGPPTK.K | 2            | NUCKS_HUMAN          |
| Q9H1E3               | 3             | 3.8437           | K.EKTPSPKEEDEEPESPPEK.K         | 1            | NUCKS_HUMAN          |
| Q9H1E3               | 3             | 5.197            | K.TPSPKEEDEEPESPPEKK.T          | 3            | NUCKS_HUMAN          |
| Q9H1E3               | 3             | 6.6248           | K.VVDYSQFQESDDADEDYGR.D         | 5            | NUCKS_HUMAN          |
| Q9H1E3               | 2             | 6.7072           | R.KVVDYSQFQESDDADEDYGR.D        | 7            | NUCKS_HUMAN          |
| Q9H1E3               | 3             | 3.9432           | K.VVDYSQFQESDDADEDYGRDSGPPTK.I  | 2            | NUCKS_HUMAN          |
| Q9H1E3               | 3             | 4.0634           | K.VVDYSQFQESDDADEDYGRDSGPPTK.K  | 2            | NUCKS_HUMAN          |

***Nuclear-interacting partner of ALK - Homo sapiens (Human)***

|        |   |       |                     |   |            |
|--------|---|-------|---------------------|---|------------|
| Q86WB0 | 2 | 4.294 | R.SQDATFSPGSEQAEK.S | 3 | NIPA_HUMAN |
|--------|---|-------|---------------------|---|------------|

***Nucleobindin-1 precursor - Homo sapiens (Human)***

|        |   |        |                                   |   |             |
|--------|---|--------|-----------------------------------|---|-------------|
| Q02818 | 2 | 3.4195 | R.YLESLGEEQRK.E                   | 7 | NUCB1_HUMAN |
| Q02818 | 3 | 3.9871 | K.FHPDTPDDVPVPAPAGDQKEVDTSSEK.L   | 1 | NUCB1_HUMAN |
| Q02818 | 3 | 5.349  | R.YLQEVIDVLETDGHR.E               | 2 | NUCB1_HUMAN |
| Q02818 | 2 | 4.2446 | R.EKLQAANAEDIK.S                  | 3 | NUCB1_HUMAN |
| Q02818 | 2 | 3.8295 | R.YLESLGEEQRK.K                   | 4 | NUCB1_HUMAN |
| Q02818 | 2 | 2.9326 | R.YEMLKEHER.R                     | 2 | NUCB1_HUMAN |
| Q02818 | 2 | 3.2156 | R.RYLESLGEEQRK.K                  | 1 | NUCB1_HUMAN |
| Q02818 | 2 | 3.5658 | R.DLELLIQTATR.D                   | 5 | NUCB1_HUMAN |
| Q02818 | 2 | 2.9698 | R.FEEELAAR.E                      | 1 | NUCB1_HUMAN |
| Q02818 | 2 | 3.6737 | R.LPEVEVPQHL.-                    | 7 | NUCB1_HUMAN |
| Q02818 | 2 | 3.5326 | R.ELQQAVLHM#EQR.K                 | 3 | NUCB1_HUMAN |
| Q02818 | 2 | 3.4515 | R.ELDFVSHHVR.T                    | 3 | NUCB1_HUMAN |
| Q02818 | 2 | 3.6623 | R.LVTLEEFLLASTQR.K                | 5 | NUCB1_HUMAN |
| Q02818 | 2 | 5.0883 | R.LVTLEEFLLASTQRK.E               | 2 | NUCB1_HUMAN |
| Q02818 | 3 | 4.1482 | K.EFGDTGEGWETVEMHPAYTEELRRFEEELAA | 1 | NUCB1_HUMAN |
| Q02818 | 2 | 3.4711 | R.DLAQYDAAHHEEFKR.Y               | 1 | NUCB1_HUMAN |
| Q02818 | 4 | 5.054  | R.KEFGDTGEGWETVEMHPAYTEELRR.F     | 1 | NUCB1_HUMAN |
| Q02818 | 2 | 3.1818 | K.LQAANAEDIK.S                    | 7 | NUCB1_HUMAN |
| Q02818 | 2 | 4.5133 | R.ELQQAVLHMEQR.K                  | 9 | NUCB1_HUMAN |
| Q02818 | 2 | 3.0572 | K.APAAHPEGQLK.F                   | 2 | NUCB1_HUMAN |
| Q02818 | 2 | 3.6385 | K.EVWEELDGLDPNR.F                 | 3 | NUCB1_HUMAN |
| Q02818 | 2 | 3.5591 | K.EVWEELDGLDPNRFNPK.T             | 1 | NUCB1_HUMAN |

| <i>Accession No*</i>                                                     | <i>Charge</i> | <i>XC(Max)**</i> | <i>Peptide*</i>               | <i>TC***</i> | <i>Reference No*</i> |
|--------------------------------------------------------------------------|---------------|------------------|-------------------------------|--------------|----------------------|
| Q02818                                                                   | 2             | 4.9666           | K.FHPDTPDDVPVPAPAGDQK.E       | 4            | NUCB1_HUMAN          |
| Q02818                                                                   | 3             | 4.0007           | K.FHPDTPDDVPVPAPAGDQKEVDTSK.K | 1            | NUCB1_HUMAN          |
| Q02818                                                                   | 2             | 3.5968           | R.LSQETEALGR.S                | 5            | NUCB1_HUMAN          |
| Q02818                                                                   | 3             | 4.7672           | K.LLERLPEVEVPQHL.-            | 4            | NUCB1_HUMAN          |
| Q02818                                                                   | 3             | 4.7609           | K.M#DAEQDPNVQVDHLLNLLK.Q      | 4            | NUCB1_HUMAN          |
| Q02818                                                                   | 3             | 4.1191           | K.MDAEQDPNVQVDHLLNLLK.Q       | 5            | NUCB1_HUMAN          |
| Q02818                                                                   | 2             | 3.0342           | K.VNVPGSQAQLK.E               | 3            | NUCB1_HUMAN          |
| Q02818                                                                   | 3             | 5.6539           | K.AKMDAEQDPNVQVDHLLNLLK.Q     | 8            | NUCB1_HUMAN          |
| <b><i>Nucleobindin-2 precursor - Homo sapiens (Human)</i></b>            |               |                  |                               |              |                      |
| P80303                                                                   | 3             | 5.8081           | R.MREHVMNEVDTNKDR.L           | 1            | NUCB2_HUMAN          |
| P80303                                                                   | 2             | 2.9602           | R.LVTLEEFK.A                  | 3            | NUCB2_HUMAN          |
| <b><i>Nucleolar complex protein 3 homolog - Homo sapiens (Human)</i></b> |               |                  |                               |              |                      |
| Q8WTT2                                                                   | 3             | 3.7519           | K.KPIPLENPKK.R                | 1            | NOC3L_HUMAN          |
| <b><i>Nucleolar phosphoprotein p130 - Homo sapiens (Human)</i></b>       |               |                  |                               |              |                      |
| Q14978                                                                   | 1             | 2.2006           | K.AAVVVS.K.S                  | 1            | NOLC1_HUMAN          |
| Q14978                                                                   | 2             | 3.0991           | R.DNQLSEVANK.F                | 2            | NOLC1_HUMAN          |
| Q14978                                                                   | 2             | 3.4682           | R.VREEEIEVDSR.V               | 2            | NOLC1_HUMAN          |
| Q14978                                                                   | 2             | 2.9296           | R.GAAGDWGER.A                 | 1            | NOLC1_HUMAN          |
| Q14978                                                                   | 2             | 2.7252           | K.GSPRPQAPK.A                 | 1            | NOLC1_HUMAN          |
| Q14978                                                                   | 2             | 3.3612           | R.VADNSFDAKR.G                | 2            | NOLC1_HUMAN          |
| Q14978                                                                   | 2             | 3.8351           | K.VAGGAAPSKPASAK.K            | 4            | NOLC1_HUMAN          |
| Q14978                                                                   | 2             | 2.8831           | K.SPAVKPAAAPK.Q               | 3            | NOLC1_HUMAN          |
| <b><i>Nucleolar protein 3 - Homo sapiens (Human)</i></b>                 |               |                  |                               |              |                      |
| O60936                                                                   | 3             | 5.2305           | R.LVETLQADSGLLLDALLAR.G       | 3            | NOL3_HUMAN           |
| O60936                                                                   | 2             | 4.9542           | R.GVLTGPEYEALDPAER.R          | 2            | NOL3_HUMAN           |
| <b><i>Nucleolar protein 5 - Homo sapiens (Human)</i></b>                 |               |                  |                               |              |                      |
| Q9Y2X3                                                                   | 3             | 6.0141           | K.VEEEEEEKVAEEEEETSVK.K       | 1            | NOL5_HUMAN           |
| Q9Y2X3                                                                   | 3             | 4.6246           | R.KIEQVDEKEDITEK.K            | 1            | NOL5_HUMAN           |
| <b><i>Nucleolar protein 7 - Homo sapiens (Human)</i></b>                 |               |                  |                               |              |                      |
| Q9UMY1                                                                   | 2             | 3.0933           | R.KLLPDTILEK.L                | 1            | NOL7_HUMAN           |
| <b><i>Nucleolar RNA helicase 2 - Homo sapiens (Human)</i></b>            |               |                  |                               |              |                      |
| Q9NR30                                                                   | 3             | 3.9376           | K.KKAEPSEVDMNSPK.S            | 1            | DDX21_HUMAN          |
| Q9NR30                                                                   | 2             | 3.4684           | R.SDAGLESMTAMK.K              | 2            | DDX21_HUMAN          |



| <i>Accession No*</i>                                                      | <i>Charge</i> | <i>XC(Max)**</i> | <i>Peptide*</i>                   | <i>TC***</i> | <i>Reference No*</i> |
|---------------------------------------------------------------------------|---------------|------------------|-----------------------------------|--------------|----------------------|
| Q9NR30                                                                    | 2             | 2.9895           | K.SDKTEEIAEEEEIVFPK.A             | 1            | DDX21_HUMAN          |
| <b><i>Nucleophosmin - Homo sapiens (Human)</i></b>                        |               |                  |                                   |              |                      |
| P06748                                                                    | 3             | 4.1892           | R.M#TDQEAIQDLWQWR.K               | 3            | NPM_HUMAN            |
| P06748                                                                    | 3             | 4.471            | R.MTDQEAIQDLWQWR.K                | 4            | NPM_HUMAN            |
| <b><i>Nucleoporin NUP53 - Homo sapiens (Human)</i></b>                    |               |                  |                                   |              |                      |
| Q8NFH5                                                                    | 2             | 2.7984           | R.SISGSPVGVMEMR.S                 | 2            | NUP53_HUMAN          |
| <b><i>Nucleoporin-like 2 - Homo sapiens (Human)</i></b>                   |               |                  |                                   |              |                      |
| O15504                                                                    | 2             | 3.5012           | K.IPLKPPPLELLNV.-                 | 1            | NUPL2_HUMAN          |
| <b><i>Nucleoporin-like protein RIP - Homo sapiens (Human)</i></b>         |               |                  |                                   |              |                      |
| P52594                                                                    | 3             | 5.7895           | K.YAALANLDNIFSAGQGGDQGSFGTTGK.A   | 1            | NUPL_HUMAN           |
| P52594                                                                    | 2             | 3.8443           | K.SSSADFGTFNTSQSHQTASAVSK.V       | 1            | NUPL_HUMAN           |
| P52594                                                                    | 2             | 3.0451           | K.GTPSQSPVVGR.S                   | 1            | NUPL_HUMAN           |
| P52594                                                                    | 2             | 2.82             | K.AGLQTADK.Y                      | 1            | NUPL_HUMAN           |
| P52594                                                                    | 3             | 6.5753           | K.AGLQTADKYAALANLDNIFSAGQGGDQGSFG | 1            | NUPL_HUMAN           |
| <b><i>Nucleosome assembly protein 1-like 1 - Homo sapiens (Human)</i></b> |               |                  |                                   |              |                      |
| P55209                                                                    | 3             | 3.7209           | R.KYAVLYQPLFDKR.F                 | 1            | NP1L1_HUMAN          |
| <b><i>Nucleosome assembly protein 1-like 4 - Homo sapiens (Human)</i></b> |               |                  |                                   |              |                      |
| Q99733                                                                    | 2             | 2.9683           | K.GIPEFWFTIFR.N                   | 1            | NP1L4_HUMAN          |
| Q99733                                                                    | 2             | 3.7268           | K.LTDQVM#QNPR.V                   | 1            | NP1L4_HUMAN          |
| Q99733                                                                    | 2             | 4.1591           | K.LTDQVMQNPR.V                    | 5            | NP1L4_HUMAN          |
| Q99733                                                                    | 3             | 4.9545           | R.LDNVPHTPSSYIETLPK.A             | 2            | NP1L4_HUMAN          |
| Q99733                                                                    | 2             | 2.7755           | K.AAATAEEDPK.G                    | 1            | NP1L4_HUMAN          |
| <b><i>Nucleosome assembly protein 1-like 5 - Homo sapiens (Human)</i></b> |               |                  |                                   |              |                      |
| Q96NT1                                                                    | 2             | 3.3026           | K.FDKEFQALEK.K                    | 2            | Q96NT1_HUMAN         |
| Q96NT1                                                                    | 2             | 4.0346           | K.NDFIESLPNSVK.C                  | 4            | Q96NT1_HUMAN         |
| Q96NT1                                                                    | 3             | 4.3932           | K.HDDAHAEM#PDDAKK.-               | 2            | Q96NT1_HUMAN         |
| <b><i>NudC domain-containing protein 2 - Homo sapiens (Human)</i></b>     |               |                  |                                   |              |                      |
| Q8WVJ2                                                                    | 2             | 3.1251           | R.HVALSVGGR.E                     | 2            | NUDC2_HUMAN          |
| <b><i>OCIA domain-containing protein 1 - Homo sapiens (Human)</i></b>     |               |                  |                                   |              |                      |
| Q9NX40                                                                    | 2             | 3.0952           | K.VNKYGDTWDE.-                    | 1            | Q9NX40_HUMAN         |
| Q9NX40                                                                    | 3             | 4.2014           | K.NRESYEVSILTQK.T                 | 7            | Q9NX40_HUMAN         |
| Q9NX40                                                                    | 1             | 2.3084           | K.NITYEELR.N                      | 3            | Q9NX40_HUMAN         |
| Q9NX40                                                                    | 1             | 2.7157           | R.ESYEVSILTQK.T                   | 1            | Q9NX40_HUMAN         |

Accession No\* Charge XC(Max)\*\* Peptide\* TC\*\*\* Reference No\*

***OCIA domain-containing protein 2 - Homo sapiens (Human)***

|        |   |        |                   |   |              |
|--------|---|--------|-------------------|---|--------------|
| Q56VL3 | 2 | 3.2126 | K.HGLSEKGDQPSAS.- | 4 | Q56VL3_HUMAN |
| Q56VL3 | 2 | 2.8968 | R.GAGFGPQHNR.H    | 1 | Q56VL3_HUMAN |

***Oligoribonuclease, mitochondrial precursor - Homo sapiens (Human)***

|        |   |        |                     |   |           |
|--------|---|--------|---------------------|---|-----------|
| Q9Y3B8 | 2 | 3.0346 | R.EGGAAMAAGESMAQR.M | 2 | ORN_HUMAN |
|--------|---|--------|---------------------|---|-----------|

***Opioid growth factor receptor - Homo sapiens (Human)***

|        |   |        |                      |   |            |
|--------|---|--------|----------------------|---|------------|
| Q9NZT2 | 2 | 4.3316 | R.DADAGDEDEESEEP.R.A | 5 | OGFR_HUMAN |
|--------|---|--------|----------------------|---|------------|

***Optineurin - Homo sapiens (Human)***

|        |   |        |                      |   |            |
|--------|---|--------|----------------------|---|------------|
| Q96CV9 | 2 | 3.7644 | R.AEAEQEKDQLR.T      | 6 | OPTN_HUMAN |
| Q96CV9 | 2 | 3.2708 | K.LSEAELMK.K         | 3 | OPTN_HUMAN |
| Q96CV9 | 2 | 3.6332 | K.ELSEKLELAEK.A      | 2 | OPTN_HUMAN |
| Q96CV9 | 2 | 3.4051 | K.ADLLGIVSELQLK.L    | 1 | OPTN_HUMAN |
| Q96CV9 | 2 | 4.3055 | K.GRFEELSAWTEK.Q     | 5 | OPTN_HUMAN |
| Q96CV9 | 2 | 2.7246 | K.LLQEHNNALK.T       | 1 | OPTN_HUMAN |
| Q96CV9 | 2 | 2.7821 | K.LNNQAMK.G          | 2 | OPTN_HUMAN |
| Q96CV9 | 2 | 4.4029 | K.LNSSGSSSEDSFVEIR.M | 2 | OPTN_HUMAN |
| Q96CV9 | 2 | 3.0766 | K.ELLTENHQLK.E       | 1 | OPTN_HUMAN |
| Q96CV9 | 2 | 2.7063 | R.FEELSAWTEK.Q       | 1 | OPTN_HUMAN |
| Q96CV9 | 2 | 3.4776 | R.LMALSHENEK.L       | 2 | OPTN_HUMAN |
| Q96CV9 | 2 | 4.0597 | R.MAEGEAEGSVK.E      | 4 | OPTN_HUMAN |
| Q96CV9 | 2 | 3.0733 | R.QSLMEMQSR.H        | 1 | OPTN_HUMAN |
| Q96CV9 | 2 | 3.2191 | R.SSEDPTDDSR.L       | 4 | OPTN_HUMAN |
| Q96CV9 | 2 | 2.9873 | K.LTVLQM#THNK.L      | 1 | OPTN_HUMAN |
| Q96CV9 | 2 | 3.5607 | R.TSDSDQAYLVQR.G     | 3 | OPTN_HUMAN |
| Q96CV9 | 2 | 3.5627 | K.LTVLQMTHNK.L       | 2 | OPTN_HUMAN |

***Organic cation/carnitine transporter 1 - Homo sapiens (Human)***

|        |   |        |                |   |             |
|--------|---|--------|----------------|---|-------------|
| Q9H015 | 2 | 3.2296 | R.DSMETEENPK.V | 1 | S22A4_HUMAN |
|--------|---|--------|----------------|---|-------------|

***Organic-cation transporter-like 3 - Homo sapiens (Human)***

|        |   |        |                   |   |             |
|--------|---|--------|-------------------|---|-------------|
| Q9Y226 | 2 | 4.1991 | K.DTLQDLELGP.HR.S | 1 | ORCT3_HUMAN |
| Q9Y226 | 2 | 3.7539 | K.TGPSGNALDLFR.H  | 3 | ORCT3_HUMAN |

***Osteoclast-stimulating factor 1 - Homo sapiens (Human)***

|        |   |        |                  |   |             |
|--------|---|--------|------------------|---|-------------|
| Q92882 | 2 | 2.9355 | R.ALYTFEPR.T     | 2 | OSTF1_HUMAN |
| Q92882 | 2 | 3.9682 | K.GYADIVQLLLAK.G | 4 | OSTF1_HUMAN |

| <i>Accession No*</i>                                                              | <i>Charge</i> | <i>XC(Max)**</i> | <i>Peptide*</i>              | <i>TC***</i> | <i>Reference No*</i> |
|-----------------------------------------------------------------------------------|---------------|------------------|------------------------------|--------------|----------------------|
| <b><i>Osteopontin precursor - Homo sapiens (Human)</i></b>                        |               |                  |                              |              |                      |
| P10451                                                                            | 2             | 3.4795           | R.ISHELDSASSEVN.-            | 4            | OSTP_HUMAN           |
| P10451                                                                            | 2             | 3.5011           | K.AIPVAQDLNAPSDWDSR.G        | 1            | OSTP_HUMAN           |
| P10451                                                                            | 3             | 4.564            | K.ANDESNEHSDVIDSQELSK.V      | 1            | OSTP_HUMAN           |
| <b><i>OTTHUMP00000016640 - Homo sapiens (Human)</i></b>                           |               |                  |                              |              |                      |
| Q5VWP4                                                                            | 2             | 3.2939           | K.DNTLEPPVETPTTLPR.A         | 2            | Q5VWP4_HUMAN         |
| <b><i>OTTHUMP00000028696 - Homo sapiens (Human)</i></b>                           |               |                  |                              |              |                      |
| Q5W189                                                                            | 2             | 4.4732           | K.LASSDTGESDQSSSTETDSTVK.S   | 5            | Q5W189_HUMAN         |
| <b><i>OTU domain-containing protein 4 - Homo sapiens (Human)</i></b>              |               |                  |                              |              |                      |
| Q01804                                                                            | 3             | 5.4757           | K.RPEPSTLENITDDKYATVSSPSK.S  | 1            | OTUD4_HUMAN          |
| Q01804                                                                            | 2             | 3.0725           | R.ESNYFGLSPEER.R             | 1            | OTUD4_HUMAN          |
| <b><i>OTU domain-containing protein 6B - Homo sapiens (Human)</i></b>             |               |                  |                              |              |                      |
| Q8N6M0                                                                            | 3             | 3.8981           | K.HREELEQLK.L                | 1            | OTU6B_HUMAN          |
| <b><i>Oxidation resistance protein 1 - Homo sapiens (Human)</i></b>               |               |                  |                              |              |                      |
| Q8N573                                                                            | 2             | 4.1181           | K.FDTTPNELVQLNK.L            | 2            | OXR1_HUMAN           |
| Q8N573                                                                            | 3             | 5.3756           | K.SSGASSESVQTVNQAEEVESLTVK.S | 3            | OXR1_HUMAN           |
| Q8N573                                                                            | 2             | 3.8188           | R.VVSSSTSEEEEFTEK.F          | 1            | OXR1_HUMAN           |
| Q8N573                                                                            | 2             | 4.6794           | R.DAGNDSASTAPR.S             | 4            | OXR1_HUMAN           |
| <b><i>Oxysterol-binding protein-related protein 11 - Homo sapiens (Human)</i></b> |               |                  |                              |              |                      |
| Q9BXB4                                                                            | 3             | 4.1812           | K.VSESEGLKLEGQATAVTPNK.N     | 2            | OSB11_HUMAN          |
| <b><i>P37 AUF1 - Homo sapiens (Human)</i></b>                                     |               |                  |                              |              |                      |
| Q12771                                                                            | 2             | 4.1757           | K.IDASKNEEDEGK.M             | 6            | Q12771_HUMAN         |
| Q12771                                                                            | 3             | 5.9756           | K.IDASKNEEDEGKMFIGGLSWDTTK.K | 1            | Q12771_HUMAN         |
| <b><i>Paired amphipathic helix protein Sin3a - Homo sapiens (Human)</i></b>       |               |                  |                              |              |                      |
| Q96ST3                                                                            | 2             | 4.1603           | R.LKVEDALSYLQVVK.L           | 1            | SIN3A_HUMAN          |
| Q96ST3                                                                            | 3             | 5.1244           | K.LQFGSQPVYNDFLDIMK.E        | 5            | SIN3A_HUMAN          |
| Q96ST3                                                                            | 2             | 3.3938           | K.SQSIDTPGVISR.V             | 4            | SIN3A_HUMAN          |
| <b><i>Paired box protein Pax-8 - Homo sapiens (Human)</i></b>                     |               |                  |                              |              |                      |
| Q06710                                                                            | 2             | 3.1716           | R.LSIDSQSSSSGPR.K            | 2            | PAX8_HUMAN           |
| <b><i>Palmdelphin - Homo sapiens (Human)</i></b>                                  |               |                  |                              |              |                      |
| Q9NP74                                                                            | 2             | 2.8161           | R.SVIQQAEEK.L                | 1            | PALMD_HUMAN          |
| Q9NP74                                                                            | 3             | 5.2167           | K.QNQQDQHQIQVLEQSILR.L       | 4            | PALMD_HUMAN          |

| <i>Accession No*</i>                                                                | <i>Charge</i> | <i>XC(Max)**</i> | <i>Peptide*</i>                 | <i>TC***</i> | <i>Reference No*</i> |
|-------------------------------------------------------------------------------------|---------------|------------------|---------------------------------|--------------|----------------------|
| Q9NP74                                                                              | 2             | 3.4164           | K.IQEEISQKR.L                   | 1            | PALMD_HUMAN          |
| <b><i>Pantothenate kinase 1 - Homo sapiens (Human)</i></b>                          |               |                  |                                 |              |                      |
| Q8TE04                                                                              | 2             | 3.745            | R.GPVGGSDAAPQR.L                | 1            | PANK1_HUMAN          |
| <b><i>Pantothenate kinase 2, mitochondrial precursor - Homo sapiens (Human)</i></b> |               |                  |                                 |              |                      |
| Q9BZ23                                                                              | 2             | 3.4468           | R.ASATSVSAGEQAAGDPEGR.R         | 2            | PANK2_HUMAN          |
| <b><i>PAP-associated domain-containing protein 5 - Homo sapiens (Human)</i></b>     |               |                  |                                 |              |                      |
| Q8NDF8                                                                              | 2             | 4.5208           | K.MQSTQTTNTSNTNK.S              | 1            | PAPD5_HUMAN          |
| <b><i>Paralemmin - Homo sapiens (Human)</i></b>                                     |               |                  |                                 |              |                      |
| O75781                                                                              | 3             | 4.457            | R.KTEVVMNSQQTPVGTK.D            | 3            | PALM_HUMAN           |
| O75781                                                                              | 2             | 3.4846           | K.EIEVLERGDSAPATAK.E            | 1            | PALM_HUMAN           |
| O75781                                                                              | 4             | 5.2757           | K.VVHAVDGTAEINGHPLSSSEVDELIHK.A | 1            | PALM_HUMAN           |
| O75781                                                                              | 2             | 2.9841           | R.APAPSPAKEER.K                 | 5            | PALM_HUMAN           |
| O75781                                                                              | 2             | 3.9116           | R.EENQAGPEATTSQPQDLDMK.K        | 2            | PALM_HUMAN           |
| O75781                                                                              | 2             | 3.6326           | R.KTEVVM#NSQQTPVGTK.D           | 2            | PALM_HUMAN           |
| O75781                                                                              | 1             | 2.8348           | R.LLEDVSR.L                     | 3            | PALM_HUMAN           |
| O75781                                                                              | 2             | 2.9518           | K.ADEVTLSEAGSTAGAAETR.G         | 1            | PALM_HUMAN           |
| O75781                                                                              | 1             | 2.5877           | K.VYEDETK.V                     | 4            | PALM_HUMAN           |
| O75781                                                                              | 2             | 3.779            | R.LLEDVSRLEK.E                  | 2            | PALM_HUMAN           |
| O75781                                                                              | 2             | 3.7757           | R.VLSSTLLPR.Q                   | 5            | PALM_HUMAN           |
| O75781                                                                              | 2             | 3.3496           | R.WLLEGTPSSASEGDEDLRR.Q         | 3            | PALM_HUMAN           |
| O75781                                                                              | 2             | 3.7803           | R.LEKEIEVLER.G                  | 3            | PALM_HUMAN           |
| <b><i>Parathyrosin - Homo sapiens (Human)</i></b>                                   |               |                  |                                 |              |                      |
| P20962                                                                              | 2             | 4.5347           | K.SVEAAAELSAK.D                 | 165          | PTMS_HUMAN           |
| <b><i>Partitioning-defective 3 homolog B - Homo sapiens (Human)</i></b>             |               |                  |                                 |              |                      |
| Q8TEW8                                                                              | 2             | 4.4682           | R.GGPADPVDYLPAAPR.G             | 4            | PAR3L_HUMAN          |
| <b><i>Partner and localizer of BRCA2 - Homo sapiens (Human)</i></b>                 |               |                  |                                 |              |                      |
| Q86YC2                                                                              | 2             | 2.8071           | K.EQEEISSKNPAR.S                | 1            | PALB2_HUMAN          |
| <b><i>Parvalbumin alpha - Homo sapiens (Human)</i></b>                              |               |                  |                                 |              |                      |
| P20472                                                                              | 2             | 3.4768           | K.M#LM#AAGDKDGDGK.I             | 3            | PRVA_HUMAN           |
| P20472                                                                              | 2             | 3.5586           | K.IGVDEFSTLVAES.-               | 2            | PRVA_HUMAN           |
| P20472                                                                              | 2             | 3.7573           | K.MLM#AAGDKDGDGK.I              | 3            | PRVA_HUMAN           |
| P20472                                                                              | 2             | 4.026            | K.MLMAAGDKDGDGK.I               | 8            | PRVA_HUMAN           |
| P20472                                                                              | 2             | 3.1243           | K.FFQM#VGLK.K                   | 5            | PRVA_HUMAN           |

| <i>Accession No*</i> | <i>Charge</i> | <i>XC(Max)**</i> | <i>Peptide*</i>        | <i>TC***</i> | <i>Reference No*</i> |
|----------------------|---------------|------------------|------------------------|--------------|----------------------|
| P20472               | 2             | 5.3418           | K.SGFIEEDELGFILK.G     | 40           | PRVA_HUMAN           |
| P20472               | 2             | 3.1879           | K.FFQMVGLK.K           | 5            | PRVA_HUMAN           |
| P20472               | 2             | 2.7518           | K.DGDGKIGVDEFSTLVAES.- | 1            | PRVA_HUMAN           |
| P20472               | 2             | 3.9614           | K.AVGAFSATDSFDHKK.F    | 3            | PRVA_HUMAN           |
| P20472               | 2             | 4.1402           | K.M#LMAAGDKDGDGK.I     | 5            | PRVA_HUMAN           |
| P20472               | 2             | 4.3634           | K.AVGAFSATDSFDHK.K     | 2            | PRVA_HUMAN           |

***PC4 and SFRS1-interacting protein - Homo sapiens (Human)***

|        |   |       |                   |   |             |
|--------|---|-------|-------------------|---|-------------|
| O75475 | 2 | 2.977 | R.ETEISLKDSTLDN.- | 2 | PSIP1_HUMAN |
|--------|---|-------|-------------------|---|-------------|

***PDZ and LIM domain protein 1 - Homo sapiens (Human)***

|        |   |        |                                     |   |             |
|--------|---|--------|-------------------------------------|---|-------------|
| O00151 | 2 | 4.963  | R.LVGGKDFEQPLAISR.V                 | 5 | PDLI1_HUMAN |
| O00151 | 2 | 3.9862 | R.SAMPFTASPASSTTAR.V                | 1 | PDLI1_HUMAN |
| O00151 | 2 | 4.0941 | K.DFEQPLAISR.V                      | 3 | PDLI1_HUMAN |
| O00151 | 2 | 4.0265 | K.QSTSFLVLQEILESEEK.G               | 2 | PDLI1_HUMAN |
| O00151 | 2 | 4.7037 | R.SAM#PFTASPASSTTAR.V               | 4 | PDLI1_HUMAN |
| O00151 | 4 | 6.1177 | K.TAASGVEANSRPLDHAQPPSSLVIDKESEVYK. | 3 | PDLI1_HUMAN |
| O00151 | 3 | 4.3634 | R.ERVTPPEGYEVVTVFPK.-               | 1 | PDLI1_HUMAN |

***PDZ and LIM domain protein 2 - Homo sapiens (Human)***

|        |   |        |                                      |    |             |
|--------|---|--------|--------------------------------------|----|-------------|
| Q96JY6 | 3 | 3.8084 | R.DFHTPIM#VTK.V                      | 1  | PDLI2_HUMAN |
| Q96JY6 | 3 | 4.694  | R.LLQEALAEERGGTPAFLPSSLSPQSSLPASR.   | 1  | PDLI2_HUMAN |
| Q96JY6 | 2 | 3.6173 | R.AGDSAVLVLPSPGPR.S                  | 4  | PDLI2_HUMAN |
| Q96JY6 | 4 | 4.9264 | K.DADLRPGDIIVAINGESAEGM#LHAEAQSK.I   | 2  | PDLI2_HUMAN |
| Q96JY6 | 3 | 6.6945 | K.AKDADLRPGDIIVAINGESAEGMLHAEAQSK.I  | 3  | PDLI2_HUMAN |
| Q96JY6 | 2 | 2.8743 | R.TYTESQSSLR.S                       | 1  | PDLI2_HUMAN |
| Q96JY6 | 2 | 4.9914 | R.LLQEALAEER.G                       | 7  | PDLI2_HUMAN |
| Q96JY6 | 2 | 4.7908 | R.AGSPFSPPPSSSLTGEAAISR.S            | 10 | PDLI2_HUMAN |
| Q96JY6 | 2 | 3.1806 | R.GGTPAFLPSSLSPQSSLPASR.A            | 1  | PDLI2_HUMAN |
| Q96JY6 | 3 | 3.7925 | R.DFHTPIMVTK.V                       | 1  | PDLI2_HUMAN |
| Q96JY6 | 4 | 4.9636 | K.AKDADLRPGDIIVAINGESAEGM#LHAEAQSK.I | 1  | PDLI2_HUMAN |
| Q96JY6 | 2 | 3.5586 | R.SSYSSPTSLSPR.A                     | 2  | PDLI2_HUMAN |
| Q96JY6 | 3 | 5.4272 | R.SSRPSM#DSEGGSLLLDEDSEVFK.M         | 2  | PDLI2_HUMAN |
| Q96JY6 | 2 | 4.8425 | R.SQATSPGQTNGDSSLEVLATR.F            | 2  | PDLI2_HUMAN |

***PDZ and LIM domain protein 3 - Homo sapiens (Human)***

|        |   |        |                     |   |             |
|--------|---|--------|---------------------|---|-------------|
| Q53GG5 | 2 | 2.8387 | R.LSGGIDFNQPLVITR.I | 1 | PDLI3_HUMAN |
|--------|---|--------|---------------------|---|-------------|

***PDZ and LIM domain protein 5 - Homo sapiens (Human)***

| <i>Accession No*</i> | <i>Charge</i> | <i>XC(Max)**</i> | <i>Peptide*</i>       | <i>TC***</i> | <i>Reference No*</i> |
|----------------------|---------------|------------------|-----------------------|--------------|----------------------|
| Q96HC4               | 2             | 2.8046           | K.VTSTNNM#AYNK.A      | 2            | PDLI5_HUMAN          |
| Q96HC4               | 1             | 2.2471           | K.TAVNVPR.Q           | 1            | PDLI5_HUMAN          |
| Q96HC4               | 2             | 3.4388           | K.VTSTNNMAYNK.A       | 4            | PDLI5_HUMAN          |
| Q96HC4               | 3             | 3.8675           | R.ASAAPKPEPVVQKGEPK.E | 1            | PDLI5_HUMAN          |
| Q96HC4               | 2             | 2.8546           | R.PFGSVSSPK.V         | 1            | PDLI5_HUMAN          |
| Q96HC4               | 2             | 4.6408           | K.EVVKVPITSPAISK.V    | 6            | PDLI5_HUMAN          |
| Q96HC4               | 2             | 4.7378           | K.APRPFGSVSSPK.V      | 3            | PDLI5_HUMAN          |

***PDZ and LIM domain protein 7 - Homo sapiens (Human)***

|        |   |        |                     |   |             |
|--------|---|--------|---------------------|---|-------------|
| Q9NR12 | 2 | 3.6409 | K.VVLEGPAPWGFR.L    | 5 | PDLI7_HUMAN |
| Q9NR12 | 2 | 4.0813 | R.LQGGKDFNVPLSISR.L | 2 | PDLI7_HUMAN |
| Q9NR12 | 2 | 2.7327 | R.AQPVQSKPQK.A      | 1 | PDLI7_HUMAN |
| Q9NR12 | 2 | 3.3317 | K.ASAPAADPPR.Y      | 2 | PDLI7_HUMAN |

***PDZ domain-containing protein 1 - Homo sapiens (Human)***

|        |   |        |                                   |    |             |
|--------|---|--------|-----------------------------------|----|-------------|
| Q5T2W1 | 2 | 4.6506 | K.DIDSGSPAEAGLK.N                 | 15 | PDZD1_HUMAN |
| Q5T2W1 | 3 | 4.2546 | K.GGPADLAGLEDEDVIEVNGVNVLDPEYEK.V | 1  | PDZD1_HUMAN |
| Q5T2W1 | 2 | 4.2774 | K.GVYMTDITPQGVAM#R.A              | 2  | PDZD1_HUMAN |
| Q5T2W1 | 2 | 2.7902 | K.AYDYFQAK.K                      | 5  | PDZD1_HUMAN |
| Q5T2W1 | 2 | 3.5495 | K.KAYDYFQAK.K                     | 4  | PDZD1_HUMAN |
| Q5T2W1 | 2 | 4.474  | R.VMFLLVDKETDKR.H                 | 3  | PDZD1_HUMAN |
| Q5T2W1 | 2 | 3.2657 | K.EGIVVESNHDSHMAK.E               | 2  | PDZD1_HUMAN |
| Q5T2W1 | 2 | 5.7961 | K.GQIIKDIDSGSPAEAGLK.N            | 3  | PDZD1_HUMAN |
| Q5T2W1 | 2 | 3.5774 | K.GSNGYGFYLR.A                    | 3  | PDZD1_HUMAN |
| Q5T2W1 | 2 | 3.0659 | K.AGLQDGDR.V                      | 5  | PDZD1_HUMAN |
| Q5T2W1 | 2 | 3.6154 | K.GVYM#TDITPQGVAMR.A              | 1  | PDZD1_HUMAN |
| Q5T2W1 | 3 | 8.976  | R.AGVLADDHLIEVNGENVEDASHEEVVEK.V  | 3  | PDZD1_HUMAN |
| Q5T2W1 | 2 | 3.6385 | K.EGIVVESNHDSHM#AK.E              | 2  | PDZD1_HUMAN |
| Q5T2W1 | 2 | 3.7278 | K.GVYM#TDITPQGVAM#R.A             | 2  | PDZD1_HUMAN |
| Q5T2W1 | 3 | 4.9397 | R.KGGDQTSLLVVDKETDNM#YR.L         | 2  | PDZD1_HUMAN |
| Q5T2W1 | 2 | 5.3413 | R.KSGNSVTLVLDGDSYEK.A             | 3  | PDZD1_HUMAN |
| Q5T2W1 | 2 | 4.4822 | R.LAHFSPFLYQSQELPNGSVK.E          | 1  | PDZD1_HUMAN |
| Q5T2W1 | 2 | 5.6665 | K.KIPIVSSLADPLDTPPSK.E            | 18 | PDZD1_HUMAN |
| Q5T2W1 | 2 | 6.0461 | R.KGGDQTSLLVVDKETDNMYR.L          | 6  | PDZD1_HUMAN |
| Q5T2W1 | 2 | 3.721  | K.KGSNGYGFYLR.A                   | 2  | PDZD1_HUMAN |
| Q5T2W1 | 3 | 4.7472 | R.INGVFVDKEEHMQVVDLVR.K           | 1  | PDZD1_HUMAN |
| Q5T2W1 | 2 | 3.5333 | R.IEKDTEGHLVR.V                   | 2  | PDZD1_HUMAN |
| Q5T2W1 | 1 | 2.1332 | R.GLPGSFIK.E                      | 1  | PDZD1_HUMAN |

| <i>Accession No*</i>                                                                            | <i>Charge</i> | <i>XC(Max)**</i> | <i>Peptide*</i>                  | <i>TC***</i> | <i>Reference No*</i> |
|-------------------------------------------------------------------------------------------------|---------------|------------------|----------------------------------|--------------|----------------------|
| Q5T2W1                                                                                          | 2             | 4.2396           | K.SGNSVTLVLDGDSYEK.A             | 2            | PDZD1_HUMAN          |
| Q5T2W1                                                                                          | 2             | 5.9233           | K.KGVYMTDITPQGVAMR.A             | 3            | PDZD1_HUMAN          |
| Q5T2W1                                                                                          | 2             | 3.679            | K.KGVYMTDITPQGVAM#R.A            | 1            | PDZD1_HUMAN          |
| Q5T2W1                                                                                          | 2             | 4.7108           | K.GVYMTDITPQGVAMR.A              | 2            | PDZD1_HUMAN          |
| <b><i>PDZ domain-containing protein 11 - Homo sapiens (Human)</i></b>                           |               |                  |                                  |              |                      |
| Q5EBL8                                                                                          | 2             | 4.0185           | K.ASQLGIFISK.V                   | 4            | PDZ11_HUMAN          |
| Q5EBL8                                                                                          | 3             | 4.3305           | R.VHHPDYNNELTQFLPR.T             | 1            | PDZ11_HUMAN          |
| Q5EBL8                                                                                          | 3             | 4.1063           | K.KPPGAQLGFNIR.G                 | 1            | PDZ11_HUMAN          |
| <b><i>PDZ domain-containing protein 2 - Homo sapiens (Human)</i></b>                            |               |                  |                                  |              |                      |
| O15018                                                                                          | 2             | 2.7728           | K.STILTLIQEAK.A                  | 1            | PDZD2_HUMAN          |
| O15018                                                                                          | 3             | 4.3422           | K.TSVDTGQVSRPENPSQPASPR.V        | 3            | PDZD2_HUMAN          |
| O15018                                                                                          | 3             | 4.0083           | K.ALEMTGIHAPESSQEPSLLEGADSVSSR.A | 1            | PDZD2_HUMAN          |
| <b><i>PDZ domain-containing protein 8 - Homo sapiens (Human)</i></b>                            |               |                  |                                  |              |                      |
| Q8NEN9                                                                                          | 3             | 5.4675           | K.VPLPSADAPNQAEPDVLVEKPEK.V      | 5            | PDZD8_HUMAN          |
| Q8NEN9                                                                                          | 2             | 3.6718           | R.LSEPGTDLVEPSPK.H               | 4            | PDZD8_HUMAN          |
| <b><i>PDZ domain-containing protein GIPC1 - Homo sapiens (Human)</i></b>                        |               |                  |                                  |              |                      |
| O14908                                                                                          | 2             | 3.8789           | R.DTELAATMVELGK.D                | 1            | GIPC1_HUMAN          |
| O14908                                                                                          | 2             | 4.4365           | R.NPDELAELDER.L                  | 3            | GIPC1_HUMAN          |
| <b><i>PDZ domain-containing protein GIPC2 - Homo sapiens (Human)</i></b>                        |               |                  |                                  |              |                      |
| Q8TF65                                                                                          | 2             | 4.7083           | R.SKGPATVEEMPSETK.A              | 2            | GIPC2_HUMAN          |
| Q8TF65                                                                                          | 2             | 3.7533           | K.GPATVEEMPSETK.A                | 5            | GIPC2_HUMAN          |
| Q8TF65                                                                                          | 2             | 3.3877           | K.IDDVLELYM#GIR.D                | 1            | GIPC2_HUMAN          |
| Q8TF65                                                                                          | 2             | 4.5729           | K.GPATVEEM#PSETK.A               | 6            | GIPC2_HUMAN          |
| Q8TF65                                                                                          | 2             | 4.7863           | R.DIDLATTMFEAGK.D                | 4            | GIPC2_HUMAN          |
| <b><i>PDZK1-interacting protein 1 - Homo sapiens (Human)</i></b>                                |               |                  |                                  |              |                      |
| Q13113                                                                                          | 2             | 4.1997           | K.ADGVLVGTDGR.Y                  | 7            | PDZ11_HUMAN          |
| Q13113                                                                                          | 1             | 3.5054           | R.YSSMAASFR.S                    | 6            | PDZ11_HUMAN          |
| Q13113                                                                                          | 2             | 3.1663           | R.YSSM#AASFR.S                   | 3            | PDZ11_HUMAN          |
| Q13113                                                                                          | 2             | 4.3431           | R.SSEHENAYENVPEEEGK.V            | 5            | PDZ11_HUMAN          |
| Q13113                                                                                          | 3             | 5.1328           | R.SSEHENAYENVPEEEGKVR.S          | 10           | PDZ11_HUMAN          |
| <b><i>Peptidase inhibitor 16 precursor - Homo sapiens (Human)</i></b>                           |               |                  |                                  |              |                      |
| Q6UXB8                                                                                          | 2             | 3.3922           | R.LMVELHNLYR.A                   | 1            | PI16_HUMAN           |
| <b><i>Peptide-N(4)-(N-acetyl-beta-glucosaminy)asparagine amidase - Homo sapiens (Human)</i></b> |               |                  |                                  |              |                      |

| <i>Accession No*</i>                                                                        | <i>Charge</i> | <i>XC(Max)**</i> | <i>Peptide*</i>                | <i>TC***</i> | <i>Reference No*</i> |
|---------------------------------------------------------------------------------------------|---------------|------------------|--------------------------------|--------------|----------------------|
| Q96IV0                                                                                      | 2             | 3.6586           | K.LLLTYADNILR.N                | 2            | NGLY1_HUMAN          |
| Q96IV0                                                                                      | 2             | 2.9431           | R.IGNTAFSTR.L                  | 1            | NGLY1_HUMAN          |
| <b><i>Peptidyl-prolyl cis-trans isomerase - Homo sapiens (Human)</i></b>                    |               |                  |                                |              |                      |
| Q6IBH5                                                                                      | 2             | 3.2585           | K.VLEGMEVVR.K                  | 2            | Q6IBH5_HUMAN         |
| Q6IBH5                                                                                      | 2             | 3.1881           | K.DTNGSQFFITTVK.T              | 1            | Q6IBH5_HUMAN         |
| Q6IBH5                                                                                      | 2             | 4.0197           | K.HYGPWVSMANAGK.D              | 4            | Q6IBH5_HUMAN         |
| Q6IBH5                                                                                      | 2             | 4.0464           | R.VIKDFMIQGGDFTR.G             | 3            | Q6IBH5_HUMAN         |
| Q6IBH5                                                                                      | 2             | 2.73             | R.VIFGLFGK.T                   | 1            | Q6IBH5_HUMAN         |
| Q6IBH5                                                                                      | 2             | 2.8252           | R.IGDEDVGR.V                   | 2            | Q6IBH5_HUMAN         |
| <b><i>Peptidyl-prolyl cis-trans isomerase A - Homo sapiens (Human)</i></b>                  |               |                  |                                |              |                      |
| P62937                                                                                      | 2             | 4.4784           | R.VSFELFADKVPK.T               | 8            | PPIA_HUMAN           |
| P62937                                                                                      | 2             | 3.7055           | R.VSFELFADK.V                  | 3            | PPIA_HUMAN           |
| <b><i>Peptidyl-prolyl cis-trans isomerase NIMA-interacting 1 - Homo sapiens (Human)</i></b> |               |                  |                                |              |                      |
| Q13526                                                                                      | 2             | 4.4127           | R.GQMQKPFEDASFALR.T            | 4            | PIN1_HUMAN           |
| Q13526                                                                                      | 3             | 3.8631           | R.VYYFNHITNASQWER.P            | 1            | PIN1_HUMAN           |
| Q13526                                                                                      | 3             | 5.5742           | R.TKEEALELINGYIQK.I            | 3            | PIN1_HUMAN           |
| <b><i>Peptidyl-prolyl cis-trans isomerase-like 2 - Homo sapiens (Human)</i></b>             |               |                  |                                |              |                      |
| Q13356                                                                                      | 2             | 4.1393           | R.AAEEEPSTSATVPMSK.K           | 2            | PPIL2_HUMAN          |
| Q13356                                                                                      | 2             | 3.8849           | R.AAEEEPSTSATVPM#SK.K          | 4            | PPIL2_HUMAN          |
| <b><i>Periaxin - Homo sapiens (Human)</i></b>                                               |               |                  |                                |              |                      |
| Q9BXM0                                                                                      | 2             | 2.7779           | R.SGSGDQEEGLR.V                | 1            | PRAX_HUMAN           |
| <b><i>Pericentrin - Homo sapiens (Human)</i></b>                                            |               |                  |                                |              |                      |
| O95613                                                                                      | 2             | 2.7526           | K.EDEIQDISLHGGK.T              | 1            | PCNT_HUMAN           |
| <b><i>Pericentriolar material 1 protein - Homo sapiens (Human)</i></b>                      |               |                  |                                |              |                      |
| Q15154                                                                                      | 4             | 5.669            | R.ILEDHGSPAGEIDDEDKDKDETETVK.Q | 5            | PCM1_HUMAN           |
| Q15154                                                                                      | 2             | 2.7025           | R.DSQPPAVPDNR.R                | 1            | PCM1_HUMAN           |
| Q15154                                                                                      | 2             | 2.7373           | R.MLQQQEQLR.A                  | 2            | PCM1_HUMAN           |
| Q15154                                                                                      | 2             | 3.4737           | R.INFSDLQQR.S                  | 2            | PCM1_HUMAN           |
| <b><i>Periphilin-1 - Homo sapiens (Human)</i></b>                                           |               |                  |                                |              |                      |
| Q8NEY8                                                                                      | 2             | 3.1748           | K.MLIEKDPSLEK.S                | 2            | PPHLN_HUMAN          |
| Q8NEY8                                                                                      | 2             | 3.9074           | R.DTSPSSGSVSSSK.V              | 3            | PPHLN_HUMAN          |
| Q8NEY8                                                                                      | 2             | 4.0097           | R.LTEKELAEAASK.W               | 3            | PPHLN_HUMAN          |
| <b><i>Periplakin - Homo sapiens (Human)</i></b>                                             |               |                  |                                |              |                      |



| <i>Accession No*</i> | <i>Charge</i> | <i>XC(Max)**</i> | <i>Peptide*</i>             | <i>TC***</i> | <i>Reference No*</i> |
|----------------------|---------------|------------------|-----------------------------|--------------|----------------------|
| O60437               | 2             | 3.0042           | R.DGGQEYVVK.E               | 4            | PEPL_HUMAN           |
| O60437               | 3             | 3.8464           | K.EVVQEILQFQEDPQTKEEVASLR.A | 1            | PEPL_HUMAN           |
| O60437               | 2             | 3.7641           | K.FSIEEALQSGR.L             | 2            | PEPL_HUMAN           |
| O60437               | 2             | 3.2015           | R.ASQEEQIAR.K               | 2            | PEPL_HUMAN           |
| O60437               | 3             | 4.0046           | K.DMSIQELAVLVSGQK.-         | 2            | PEPL_HUMAN           |
| O60437               | 3             | 3.7821           | R.KYEHLQLLDLAQEK.V          | 1            | PEPL_HUMAN           |
| O60437               | 2             | 2.8842           | K.FTEVYAINR.Q               | 1            | PEPL_HUMAN           |
| O60437               | 2             | 4.4627           | R.LQNLEFALNLLR.Q            | 3            | PEPL_HUMAN           |
| O60437               | 3             | 4.3086           | K.NQLLQEELEALQLQR.A         | 2            | PEPL_HUMAN           |
| O60437               | 2             | 5.0046           | K.SLLGEVEQNQAQK.Q           | 4            | PEPL_HUMAN           |
| O60437               | 2             | 3.8614           | K.KFSIEEALQSGR.L            | 2            | PEPL_HUMAN           |
| O60437               | 2             | 4.2271           | R.STAEGEAFIQALPGSGTTPLLR.T  | 2            | PEPL_HUMAN           |
| O60437               | 2             | 3.392            | R.LAALEQEEAEAR.E            | 1            | PEPL_HUMAN           |
| O60437               | 3             | 5.2566           | R.VVQQEVVRYEEEEPLR.A        | 2            | PEPL_HUMAN           |
| O60437               | 3             | 3.8482           | R.YVNKDMSIQELAVLVSGQK.-     | 1            | PEPL_HUMAN           |
| O60437               | 2             | 3.8883           | K.VVLQQDPQQR.E              | 2            | PEPL_HUMAN           |
| O60437               | 2             | 2.8403           | R.AGLIDWNMFVK.L             | 1            | PEPL_HUMAN           |
| O60437               | 3             | 3.8223           | R.TLAEQHKNQLLQEELEALQLQR.A  | 1            | PEPL_HUMAN           |
| O60437               | 2             | 3.3804           | R.RAQSLSAK.A                | 2            | PEPL_HUMAN           |
| O60437               | 2             | 5.0754           | K.KVPDPVLEESFQQLQR.T        | 2            | PEPL_HUMAN           |
| O60437               | 2             | 2.9094           | K.VKEEEAALAAK.F             | 2            | PEPL_HUMAN           |
| O60437               | 3             | 3.8533           | K.LQNDPQLEAEYQQLQEDHQR.Q    | 1            | PEPL_HUMAN           |
| O60437               | 2             | 3.1087           | K.NLLDEIASR.E               | 1            | PEPL_HUMAN           |
| O60437               | 2             | 3.8183           | R.NMTVADSGTNHDSR.L          | 2            | PEPL_HUMAN           |

***Peroxiredoxin-1 - Homo sapiens (Human)***

|        |   |        |                         |   |             |
|--------|---|--------|-------------------------|---|-------------|
| Q06830 | 1 | 3.044  | R.TIAQDYGVLK.A          | 5 | PRDX1_HUMAN |
| Q06830 | 2 | 4.8594 | K.QGGLGPMNIPLVSDPK.R    | 2 | PRDX1_HUMAN |
| Q06830 | 3 | 3.71   | K.QGGLGPM#NIPLVSDPKR.T  | 1 | PRDX1_HUMAN |
| Q06830 | 2 | 2.8477 | K.DISLSDYK.G            | 4 | PRDX1_HUMAN |
| Q06830 | 2 | 3.9828 | R.LVQAFQFTDK.H          | 6 | PRDX1_HUMAN |
| Q06830 | 2 | 3.1056 | K.ADEGISFR.G            | 1 | PRDX1_HUMAN |
| Q06830 | 3 | 5.0643 | K.KQGGLGPMNIPLVSDPKR.T  | 1 | PRDX1_HUMAN |
| Q06830 | 2 | 3.8234 | K.ATAVMPDGQFKDISLSDYK.G | 1 | PRDX1_HUMAN |
| Q06830 | 2 | 2.863  | K.ATAVMPDGQFK.D         | 1 | PRDX1_HUMAN |

***Peroxiredoxin-2 - Homo sapiens (Human)***

|        |   |        |               |   |             |
|--------|---|--------|---------------|---|-------------|
| P32119 | 2 | 3.8869 | R.RLSEYGVLK.T | 4 | PRDX2_HUMAN |
|--------|---|--------|---------------|---|-------------|

| <i>Accession No*</i>                                                                           | <i>Charge</i> | <i>XC(Max)**</i> | <i>Peptide*</i>                 | <i>TC***</i> | <i>Reference No*</i> |
|------------------------------------------------------------------------------------------------|---------------|------------------|---------------------------------|--------------|----------------------|
| P32119                                                                                         | 2             | 3.006            | R.LSEGYGVLK.T                   | 2            | PRDX2_HUMAN          |
| P32119                                                                                         | 3             | 5.0696           | K.EGGLGPLNIPLLADVTR.R           | 1            | PRDX2_HUMAN          |
| P32119                                                                                         | 1             | 2.4688           | R.GLFIIDGK.G                    | 3            | PRDX2_HUMAN          |
| P32119                                                                                         | 3             | 4.1142           | R.KEGGLGPLNIPLLADVTR.R          | 2            | PRDX2_HUMAN          |
| <b><i>Peroxiredoxin-4 - Homo sapiens (Human)</i></b>                                           |               |                  |                                 |              |                      |
| Q13162                                                                                         | 2             | 2.8301           | R.QITLNDLPVGR.S                 | 2            | PRDX4_HUMAN          |
| Q13162                                                                                         | 2             | 3.4487           | R.LVQAFQYTDK.H                  | 1            | PRDX4_HUMAN          |
| <b><i>Peroxiredoxin-5, mitochondrial precursor - Homo sapiens (Human)</i></b>                  |               |                  |                                 |              |                      |
| P30044                                                                                         | 2             | 3.4936           | K.RFSMVVQDGIVK.A                | 3            | PRDX5_HUMAN          |
| P30044                                                                                         | 2             | 3.2012           | R.LLADPTGAFGK.E                 | 2            | PRDX5_HUMAN          |
| P30044                                                                                         | 2             | 3.1142           | K.VNLAELFK.G                    | 2            | PRDX5_HUMAN          |
| P30044                                                                                         | 2             | 4.2288           | K.THLPGFVEQAEALK.A              | 4            | PRDX5_HUMAN          |
| P30044                                                                                         | 4             | 5.741            | K.VGDAIPAVEVFEGEPGNKVNLAELFK.G  | 1            | PRDX5_HUMAN          |
| <b><i>Peroxiredoxin-6 - Homo sapiens (Human)</i></b>                                           |               |                  |                                 |              |                      |
| P30041                                                                                         | 2             | 3.0294           | K.LSILYPATTGR.N                 | 1            | PRDX6_HUMAN          |
| <b><i>Peroxisomal bifunctional enzyme - Homo sapiens (Human)</i></b>                           |               |                  |                                 |              |                      |
| Q08426                                                                                         | 2             | 2.857            | K.EWQSLAGSPSSKL.-               | 1            | ECHP_HUMAN           |
| Q08426                                                                                         | 3             | 4.6785           | K.LASQGNPPLKEWQSLAGSPSSKL.-     | 1            | ECHP_HUMAN           |
| <b><i>Peroxisomal membrane protein PEX14 - Homo sapiens (Human)</i></b>                        |               |                  |                                 |              |                      |
| O75381                                                                                         | 3             | 3.7835           | K.EGHSPEGSTVYHLLGPQEEGEGVVDVK.G | 1            | PEX14_HUMAN          |
| O75381                                                                                         | 2             | 4.2535           | R.GGDGQINEQVEK.L                | 11           | PEX14_HUMAN          |
| O75381                                                                                         | 2             | 2.7574           | K.IPSWQIPVK.S                   | 1            | PEX14_HUMAN          |
| <b><i>Peroxisomal sarcosine oxidase - Homo sapiens (Human)</i></b>                             |               |                  |                                 |              |                      |
| Q9P0Z9                                                                                         | 2             | 4.4723           | R.TDIGDVQILSSFVR.D              | 2            | SOX_HUMAN            |
| <b><i>PERQ amino acid-rich with GYF domain-containing protein 2 - Homo sapiens (Human)</i></b> |               |                  |                                 |              |                      |
| Q6Y7W6                                                                                         | 2             | 4.1833           | K.TEQTEKAEETR.M                 | 3            | PERQ2_HUMAN          |
| Q6Y7W6                                                                                         | 2             | 4.0013           | R.AYLGDTSEAKEFAK.Q              | 3            | PERQ2_HUMAN          |
| Q6Y7W6                                                                                         | 2             | 4.4837           | K.ALQQQQQQQQK.L                 | 3            | PERQ2_HUMAN          |
| Q6Y7W6                                                                                         | 3             | 3.9003           | K.DVGRPNFEEGGPTSVGR.K           | 2            | PERQ2_HUMAN          |
| Q6Y7W6                                                                                         | 2             | 2.8601           | K.NSNMGFWDDAVK.E                | 2            | PERQ2_HUMAN          |
| Q6Y7W6                                                                                         | 2             | 4.5144           | K.SLLEIQQEEAR.Q                 | 3            | PERQ2_HUMAN          |
| <b><i>Pescadillo homolog 1 - Homo sapiens (Human)</i></b>                                      |               |                  |                                 |              |                      |
| O00541                                                                                         | 2             | 3.519            | R.LAQEESEAKR.L                  | 1            | PESC_HUMAN           |

Accession No\* Charge XC(Max)\*\* Peptide\* TC\*\*\* Reference No\*

***PEST proteolytic signal-containing nuclear protein - Homo sapiens (Human)***

|        |   |        |                      |   |            |
|--------|---|--------|----------------------|---|------------|
| Q8WW12 | 3 | 4.3836 | K.RSAEEEEADLPTKPTK.I | 2 | PCNP_HUMAN |
| Q8WW12 | 2 | 4.9472 | R.AGAAGGPEEEAEKPVK.T | 6 | PCNP_HUMAN |
| Q8WW12 | 2 | 2.9889 | K.FGFAIGSQTTK.K      | 2 | PCNP_HUMAN |
| Q8WW12 | 2 | 3.5809 | R.DTPTSAGPNSFNK.G    | 3 | PCNP_HUMAN |
| Q8WW12 | 2 | 4.8282 | R.SAEEEEADLPTKPTK.I  | 5 | PCNP_HUMAN |
| Q8WW12 | 2 | 3.4839 | K.HGFSDNQK.L         | 1 | PCNP_HUMAN |
| Q8WW12 | 2 | 3.2444 | K.SHLGNVHDQDN.-      | 3 | PCNP_HUMAN |

***PH domain leucine-rich repeat-containing protein phosphatase - Homo sapiens (Human)***

|        |   |        |                                    |   |             |
|--------|---|--------|------------------------------------|---|-------------|
| O60346 | 3 | 4.1711 | R.ASAPAAAAAAAAAAAAAAAAALAAAAGGGR.S | 2 | PHLPP_HUMAN |
|--------|---|--------|------------------------------------|---|-------------|

***PHD finger protein 14 - Homo sapiens (Human)***

|        |   |        |                   |   |             |
|--------|---|--------|-------------------|---|-------------|
| O94880 | 2 | 2.7032 | K.NSAEEEEVLSSEK.Q | 1 | PHF14_HUMAN |
|--------|---|--------|-------------------|---|-------------|

***PHD finger protein 3 - Homo sapiens (Human)***

|        |   |        |                      |   |            |
|--------|---|--------|----------------------|---|------------|
| Q92576 | 2 | 2.8427 | R.DKVEENSVR.S        | 1 | PHF3_HUMAN |
| Q92576 | 3 | 4.1106 | R.KVEQDSKETVK.L      | 2 | PHF3_HUMAN |
| Q92576 | 2 | 3.2869 | K.ESGNDTIDEEELIPNR.N | 1 | PHF3_HUMAN |
| Q92576 | 2 | 3.176  | K.TGETVVEEMIAATR.K   | 2 | PHF3_HUMAN |

***Phenazine biosynthesis-like domain-containing protein - Homo sapiens (Human)***

|        |   |        |                    |   |            |
|--------|---|--------|--------------------|---|------------|
| P30039 | 2 | 3.7119 | K.VNTENLLQVENTGK.V | 1 | PBLD_HUMAN |
|--------|---|--------|--------------------|---|------------|

***Phenylalanyl-tRNA synthetase alpha chain - Homo sapiens (Human)***

|        |   |        |                    |   |            |
|--------|---|--------|--------------------|---|------------|
| Q9Y285 | 2 | 4.3404 | K.SLQALGEVIEAELR.S | 2 | SYFA_HUMAN |
|--------|---|--------|--------------------|---|------------|

***Phenylalanyl-tRNA synthetase beta chain - Homo sapiens (Human)***

|        |   |       |               |   |            |
|--------|---|-------|---------------|---|------------|
| Q9NSD9 | 2 | 3.329 | R.DLLFQALGR.T | 2 | SYFB_HUMAN |
|--------|---|-------|---------------|---|------------|

***PH-interacting protein - Homo sapiens (Human)***

|        |   |        |                        |   |            |
|--------|---|--------|------------------------|---|------------|
| Q8WWQ0 | 2 | 4.9574 | R.VVVDPVVTEQPSTSSAAK.T | 2 | PHIP_HUMAN |
|--------|---|--------|------------------------|---|------------|

***Phosphatase and actin regulator 4 - Homo sapiens (Human)***

|        |   |        |                           |   |             |
|--------|---|--------|---------------------------|---|-------------|
| Q8IZ21 | 3 | 3.7581 | R.IQQALTSPLPMTPILEGSHR.A  | 1 | PHAR4_HUMAN |
| Q8IZ21 | 3 | 5.0882 | R.AHSLLFENSDFSSEDSSTLGR.T | 2 | PHAR4_HUMAN |

***Phosphatidylethanolamine-binding protein 1 - Homo sapiens (Human)***

|        |   |        |                         |    |             |
|--------|---|--------|-------------------------|----|-------------|
| P30086 | 3 | 4.9871 | K.GNDISSGTVLSDYVGSPPK.G | 3  | PEBP1_HUMAN |
| P30086 | 2 | 4.6417 | K.NRPTSISWDGLDSGK.L     | 12 | PEBP1_HUMAN |
| P30086 | 2 | 3.7894 | R.PTSISWDGLDSGK.L       | 1  | PEBP1_HUMAN |

| <i>Accession No*</i> | <i>Charge</i> | <i>XC(Max)**</i> | <i>Peptide*</i>                   | <i>TC***</i> | <i>Reference No*</i> |
|----------------------|---------------|------------------|-----------------------------------|--------------|----------------------|
| P30086               | 2             | 4.5269           | K.LYTLVLTPDAPS.R.K                | 4            | PEBP1_HUMAN          |
| P30086               | 2             | 2.9692           | K.LYEQLSGK.-                      | 6            | PEBP1_HUMAN          |
| P30086               | 4             | 7.299            | K.WSGPLSLQEVDQEQHPLHVITYAGAAVDELG | 29           | PEBP1_HUMAN          |
| P30086               | 2             | 4.4081           | K.LYTLVLTPDAPS.R.K.D              | 2            | PEBP1_HUMAN          |
| P30086               | 4             | 4.9884           | K.WSGPLSLQEVDQEQHPLHVITYAGAAVDELG | 1            | PEBP1_HUMAN          |
| P30086               | 2             | 4.5856           | R.YVWLVEQDRPLK.C                  | 7            | PEBP1_HUMAN          |
| P30086               | 3             | 4.3002           | K.YREWHHFLVNMK.G                  | 3            | PEBP1_HUMAN          |
| P30086               | 2             | 3.174            | K.LYTLVLTPDAPS.R.KDPK.Y           | 1            | PEBP1_HUMAN          |

***Phosphatidylinositol-4-phosphate 3-kinase C2 domain-containing alpha polypeptide - Homo sapie***

|        |   |        |                         |   |             |
|--------|---|--------|-------------------------|---|-------------|
| O00443 | 2 | 2.8367 | R.TDLEITDSK.V           | 1 | P3C2A_HUMAN |
| O00443 | 3 | 5.9976 | R.AKDVDKEEALQMEAEALAK.L | 2 | P3C2A_HUMAN |
| O00443 | 2 | 3.9896 | K.DPWDAVLEER.S          | 2 | P3C2A_HUMAN |

***Phosphatidylinositol-4-phosphate 5-kinase type-1 gamma - Homo sapiens (Human)***

|        |   |        |                |   |             |
|--------|---|--------|----------------|---|-------------|
| O60331 | 2 | 3.1582 | R.SPSETSEQPR.Y | 2 | PI51C_HUMAN |
|--------|---|--------|----------------|---|-------------|

***Phosphatidylinositol-4-phosphate 5-kinase type-2 gamma - Homo sapiens (Human)***

|        |   |        |                       |   |             |
|--------|---|--------|-----------------------|---|-------------|
| Q8TBX8 | 3 | 5.3129 | K.HGAGAEISTVHPEQYAK.R | 1 | PI52C_HUMAN |
|--------|---|--------|-----------------------|---|-------------|

***Phosphoenolpyruvate carboxykinase, cytosolic [GTP] - Homo sapiens (Human)***

|        |   |        |                         |   |             |
|--------|---|--------|-------------------------|---|-------------|
| P35558 | 2 | 2.722  | R.SEATAAAEHK.G          | 1 | PPCKC_HUMAN |
| P35558 | 2 | 4.1373 | R.AINPENGGFFGVAPGTSVK.T | 2 | PPCKC_HUMAN |
| P35558 | 2 | 2.8748 | R.TMYVIFFSMGLSPLSK.I    | 1 | PPCKC_HUMAN |
| P35558 | 2 | 4.0018 | K.VVQGSLDSLPAQVR.E      | 3 | PPCKC_HUMAN |

***Phosphofurin acidic cluster sorting protein 1 - Homo sapiens (Human)***

|        |   |        |                         |   |             |
|--------|---|--------|-------------------------|---|-------------|
| Q6VY07 | 2 | 3.7178 | K.TDLQGSASPSK.V         | 3 | PACS1_HUMAN |
| Q6VY07 | 3 | 4.9808 | K.TDLQGSASPSKVEGVHTPR.Q | 2 | PACS1_HUMAN |
| Q6VY07 | 3 | 3.9408 | K.VSDEVGFGLEHVS.R.E     | 1 | PACS1_HUMAN |
| Q6VY07 | 2 | 3.404  | K.DTTSPM#ELAALK.I       | 2 | PACS1_HUMAN |

***Phosphoglycerate kinase 1 - Homo sapiens (Human)***

|        |   |        |                                    |   |            |
|--------|---|--------|------------------------------------|---|------------|
| P00558 | 4 | 6.0455 | K.SVVLMSHLGRPDGVPMPDKYSLEPVAVELK.S | 1 | PGK1_HUMAN |
| P00558 | 2 | 2.7178 | K.AGGFLMK.K                        | 1 | PGK1_HUMAN |
| P00558 | 2 | 3.0195 | K.VLPGVDALSNI.-                    | 1 | PGK1_HUMAN |
| P00558 | 2 | 4.6627 | K.VLNNMEIGTSLFDEEGAK.I             | 3 | PGK1_HUMAN |
| P00558 | 3 | 3.8981 | K.ALESPERPFLAILGGAK.V              | 1 | PGK1_HUMAN |
| P00558 | 2 | 2.8735 | K.NNQITNNQR.I                      | 4 | PGK1_HUMAN |

| <i>Accession No*</i>                                                                       | <i>Charge</i> | <i>XC(Max)**</i> | <i>Peptide*</i>               | <i>TC***</i> | <i>Reference No*</i> |
|--------------------------------------------------------------------------------------------|---------------|------------------|-------------------------------|--------------|----------------------|
| <b><i>Phytanoyl-CoA 2-hydroxylase interacting protein-like - Homo sapiens (Human)</i></b>  |               |                  |                               |              |                      |
| Q96FC7                                                                                     | 3             | 4.306            | K.SQDSGIAEMEELPVPVPHNIK.I     | 1            | Q96FC7_HUMAN         |
| <b><i>Pigment epithelium-derived factor precursor - Homo sapiens (Human)</i></b>           |               |                  |                               |              |                      |
| P36955                                                                                     | 2             | 3.7403           | K.LAAAVSNFQYDLYR.V            | 2            | PEDF_HUMAN           |
| <b><i>Pinin - Homo sapiens (Human)</i></b>                                                 |               |                  |                               |              |                      |
| Q9H307                                                                                     | 2             | 3.1281           | R.DLIQDQNMDEK.G               | 2            | PININ_HUMAN          |
| Q9H307                                                                                     | 2             | 3.0054           | R.DLIQDQNM#DEK.G              | 2            | PININ_HUMAN          |
| Q9H307                                                                                     | 2             | 4.6233           | R.NEEQKAEQEEGK.V              | 2            | PININ_HUMAN          |
| <b><i>Pirin - Homo sapiens (Human)</i></b>                                                 |               |                  |                               |              |                      |
| O00625                                                                                     | 2             | 4.0931           | K.NLDPFLLFDEFK.G              | 3            | PIR_HUMAN            |
| <b><i>Plakophilin-4 - Homo sapiens (Human)</i></b>                                         |               |                  |                               |              |                      |
| Q99569                                                                                     | 3             | 4.9236           | R.QEAASTGPGMEPETTATTILASVK.E  | 1            | PKP4_HUMAN           |
| Q99569                                                                                     | 2             | 3.114            | R.QEAASTGPGM#EPETTATTILASVK.E | 1            | PKP4_HUMAN           |
| <b><i>Plasma membrane calcium-transporting ATPase 1 - Homo sapiens (Human)</i></b>         |               |                  |                               |              |                      |
| P20020                                                                                     | 3             | 5.1427           | R.IEDSEPHIPLIDDTDAEDDAPTKR.N  | 1            | AT2B1_HUMAN          |
| P20020                                                                                     | 3             | 4.3668           | R.IEDSEPHIPLIDDTDAEDDAPTK.R   | 1            | AT2B1_HUMAN          |
| <b><i>Plasma membrane calcium-transporting ATPase 4 - Homo sapiens (Human)</i></b>         |               |                  |                               |              |                      |
| P23634                                                                                     | 2             | 5.0944           | R.TPLLDEEEEEENPDK.A           | 2            | AT2B4_HUMAN          |
| P23634                                                                                     | 2             | 4.4419           | R.TPLLDEEEEEENPDKASK.F        | 7            | AT2B4_HUMAN          |
| <b><i>Plasma serine protease inhibitor precursor - Homo sapiens (Human)</i></b>            |               |                  |                               |              |                      |
| P05154                                                                                     | 2             | 3.5644           | R.AAAATGTIFTFR.S              | 5            | IPSP_HUMAN           |
| P05154                                                                                     | 2             | 4.5056           | K.AVVEVDESCTR.A               | 16           | IPSP_HUMAN           |
| P05154                                                                                     | 2             | 4.3493           | R.GFQQLLQELNQPR.D             | 3            | IPSP_HUMAN           |
| <b><i>Plasminogen activator inhibitor 1 RNA-binding protein - Homo sapiens (Human)</i></b> |               |                  |                               |              |                      |
| Q8NC51                                                                                     | 3             | 4.9684           | R.KPANDITSQLEINFGDLGR.P       | 6            | PAIRB_HUMAN          |
| Q8NC51                                                                                     | 2             | 3.642            | K.KEAGGGVGGPGAK.S             | 1            | PAIRB_HUMAN          |
| Q8NC51                                                                                     | 2             | 3.0439           | K.EETQPPVALKK.E               | 1            | PAIRB_HUMAN          |
| Q8NC51                                                                                     | 2             | 2.7853           | R.AKVEFNIR.K                  | 1            | PAIRB_HUMAN          |
| Q8NC51                                                                                     | 2             | 4.219            | R.RPDQQLQEGEK.I               | 7            | PAIRB_HUMAN          |
| Q8NC51                                                                                     | 2             | 4.0501           | R.FDQLFDDSDPFVLLK.A           | 5            | PAIRB_HUMAN          |
| Q8NC51                                                                                     | 2             | 3.5193           | K.EAGGGVGGPGAK.S              | 9            | PAIRB_HUMAN          |
| Q8NC51                                                                                     | 2             | 5.4915           | K.SAAQAAAQTNNAAGK.Q           | 9            | PAIRB_HUMAN          |
| Q8NC51                                                                                     | 3             | 4.4883           | R.KNPLPPSVGVVDKK.E            | 4            | PAIRB_HUMAN          |

| <i>Accession No*</i>                                                                            | <i>Charge</i> | <i>XC(Max)**</i> | <i>Peptide*</i>                     | <i>TC***</i> | <i>Reference No*</i> |
|-------------------------------------------------------------------------------------------------|---------------|------------------|-------------------------------------|--------------|----------------------|
| Q8NC51                                                                                          | 2             | 4.4999           | R.KPNEGADGQWK.K                     | 7            | PAIRB_HUMAN          |
| Q8NC51                                                                                          | 3             | 3.9843           | R.GGSGSHNWGTVKDELTESPK.Y            | 1            | PAIRB_HUMAN          |
| <b><i>Plasminogen precursor - Homo sapiens (Human)</i></b>                                      |               |                  |                                     |              |                      |
| P00747                                                                                          | 2             | 3.5936           | R.HSIFTPETNPR.A                     | 3            | PLMN_HUMAN           |
| <b><i>Platelet basic protein precursor - Homo sapiens (Human)</i></b>                           |               |                  |                                     |              |                      |
| P02775                                                                                          | 1             | 2.1907           | K.LAGDESAD.-                        | 1            | SCYB7_HUMAN          |
| <b><i>Platelet endothelial cell adhesion molecule precursor - Homo sapiens (Human)</i></b>      |               |                  |                                     |              |                      |
| P16284                                                                                          | 3             | 3.7522           | K.MSDPNMEANSHYGHNDVDR.N             | 1            | PECA1_HUMAN          |
| P16284                                                                                          | 2             | 3.4099           | K.DTETVYSEVRK.A                     | 5            | PECA1_HUMAN          |
| P16284                                                                                          | 2             | 3.6393           | K.DTETVYSEVRK.K                     | 3            | PECA1_HUMAN          |
| <b><i>Platelet-activating factor acetylhydrolase IB subunit beta - Homo sapiens (Human)</i></b> |               |                  |                                     |              |                      |
| P68402                                                                                          | 2             | 3.9065           | K.IIVLGLLPR.G                       | 4            | PA1B2_HUMAN          |
| <b><i>Pleckstrin homology domain-containing family A member 1 - Homo sapiens (Human)</i></b>    |               |                  |                                     |              |                      |
| Q9HB21                                                                                          | 2             | 4.1352           | K.VTEQALLRPQSK.N                    | 2            | PKHA1_HUMAN          |
| <b><i>Pleckstrin homology domain-containing family A member 5 - Homo sapiens (Human)</i></b>    |               |                  |                                     |              |                      |
| Q9HAU0                                                                                          | 2             | 2.7397           | R.MTVEEQMER.I                       | 1            | PKHA5_HUMAN          |
| Q9HAU0                                                                                          | 2             | 3.9784           | R.GTTEIGM#IGSKPFSTVK.Y              | 2            | PKHA5_HUMAN          |
| Q9HAU0                                                                                          | 2             | 4.8063           | R.GTTEIGMIGSKPFSTVK.Y               | 6            | PKHA5_HUMAN          |
| Q9HAU0                                                                                          | 3             | 6.1211           | R.NQM#QEQLDHLGEVQTESAGIQR.A         | 5            | PKHA5_HUMAN          |
| Q9HAU0                                                                                          | 2             | 2.9742           | R.GVISYQTLPR.N                      | 2            | PKHA5_HUMAN          |
| Q9HAU0                                                                                          | 2             | 4.1371           | R.TNSMQQLEQWIK.I                    | 2            | PKHA5_HUMAN          |
| Q9HAU0                                                                                          | 2             | 3.415            | R.IQDVMEGLSK.H                      | 2            | PKHA5_HUMAN          |
| Q9HAU0                                                                                          | 3             | 3.767            | R.GGNRPNTGPLYTEADR.V                | 2            | PKHA5_HUMAN          |
| Q9HAU0                                                                                          | 2             | 5.5569           | R.NQMQEQLDHLGEVQTESAGIQR.A          | 1            | PKHA5_HUMAN          |
| Q9HAU0                                                                                          | 2             | 3.7168           | K.SEPELTTVAEVDENSGEEK.S             | 2            | PKHA5_HUMAN          |
| Q9HAU0                                                                                          | 2             | 3.5835           | R.EYDKLEYDVTVTR.N                   | 1            | PKHA5_HUMAN          |
| Q9HAU0                                                                                          | 2             | 3.337            | K.SEPVSEIETSVVK.G                   | 2            | PKHA5_HUMAN          |
| Q9HAU0                                                                                          | 2             | 4.4267           | K.IVNVSLADLR.G                      | 2            | PKHA5_HUMAN          |
| Q9HAU0                                                                                          | 2             | 3.6743           | R.VLIKPEIQNNQK.N                    | 2            | PKHA5_HUMAN          |
| Q9HAU0                                                                                          | 3             | 4.5577           | K.SEPELTTVAEVDENSGEEKSEPVSEIETSVVK. | 2            | PKHA5_HUMAN          |
| Q9HAU0                                                                                          | 2             | 4.5835           | K.SPTPESSTIASYVTLR.K                | 1            | PKHA5_HUMAN          |
| Q9HAU0                                                                                          | 2             | 2.9787           | K.YKNEGPDYR.L                       | 3            | PKHA5_HUMAN          |
| Q9HAU0                                                                                          | 2             | 4.1472           | K.YRPEEVDIDAK.L                     | 6            | PKHA5_HUMAN          |
| Q9HAU0                                                                                          | 4             | 5.1364           | K.YTLEQALLSASQEIEMHADNPAAIQTVVLQR.D | 1            | PKHA5_HUMAN          |

| <i>Accession No*</i>                                                                         | <i>Charge</i> | <i>XC(Max)**</i> | <i>Peptide*</i>                  | <i>TC***</i> | <i>Reference No*</i> |
|----------------------------------------------------------------------------------------------|---------------|------------------|----------------------------------|--------------|----------------------|
| Q9HAU0                                                                                       | 2             | 4.1096           | K.GLNVIGASDQSPLQSPSNLR.D         | 2            | PKHA5_HUMAN          |
| <b><i>Pleckstrin homology domain-containing family A member 7 - Homo sapiens (Human)</i></b> |               |                  |                                  |              |                      |
| Q6IQ23                                                                                       | 3             | 4.5756           | R.HPVTGQFSPENSEFILQEENPHM#SK.Q   | 1            | PKHA7_HUMAN          |
| Q6IQ23                                                                                       | 3             | 7.0825           | R.NQRPSSMVSETSTAGTASTLEAKPGPK.I  | 2            | PKHA7_HUMAN          |
| Q6IQ23                                                                                       | 2             | 3.109            | R.AMNQAAQVLSR.S                  | 2            | PKHA7_HUMAN          |
| Q6IQ23                                                                                       | 3             | 6.0995           | R.HPVTGQFSPENSEFILQEENPHMSK.Q    | 4            | PKHA7_HUMAN          |
| Q6IQ23                                                                                       | 2             | 3.6868           | R.IEDVTAGLSANK.E                 | 1            | PKHA7_HUMAN          |
| Q6IQ23                                                                                       | 3             | 6.5469           | R.NQRPSSM#VSETSTAGTASTLEAKPGPK.I | 2            | PKHA7_HUMAN          |
| Q6IQ23                                                                                       | 2             | 3.0844           | R.SISVPPSPDIPPPGPPR.V            | 1            | PKHA7_HUMAN          |
| Q6IQ23                                                                                       | 2             | 3.4084           | R.SLPLDQTLPR.Q                   | 1            | PKHA7_HUMAN          |
| Q6IQ23                                                                                       | 2             | 2.9897           | R.SPYSPEEDALFM#DLPTGPR.G         | 2            | PKHA7_HUMAN          |
| Q6IQ23                                                                                       | 2             | 3.4503           | R.SPYSPEEDALFMDLPTGPR.G          | 2            | PKHA7_HUMAN          |
| Q6IQ23                                                                                       | 2             | 3.4982           | R.VLQDLEDKIR.A                   | 2            | PKHA7_HUMAN          |
| Q6IQ23                                                                                       | 2             | 3.532            | R.VFFINDQLR.C                    | 4            | PKHA7_HUMAN          |
| Q6IQ23                                                                                       | 2             | 3.5774           | K.LLQEDLVHIR.A                   | 1            | PKHA7_HUMAN          |
| Q6IQ23                                                                                       | 2             | 3.3685           | R.QGPGQSLSPENYQTLPK.S            | 3            | PKHA7_HUMAN          |
| <b><i>Pleckstrin homology-like domain family B member 1 - Homo sapiens (Human)</i></b>       |               |                  |                                  |              |                      |
| Q86UU1                                                                                       | 2             | 3.1892           | R.SSEEPGVATQR.L                  | 4            | PHLB1_HUMAN          |
| Q86UU1                                                                                       | 3             | 4.9404           | R.DKEAEALETETKLFEDLEFQQLER.E     | 1            | PHLB1_HUMAN          |
| Q86UU1                                                                                       | 2             | 4.3848           | R.DKEAEALETETK.L                 | 2            | PHLB1_HUMAN          |
| <b><i>Pleckstrin homology-like domain family B member 2 - Homo sapiens (Human)</i></b>       |               |                  |                                  |              |                      |
| Q86SQ0                                                                                       | 2             | 4.19             | K.RLQEETSQR.Q                    | 5            | PHLB2_HUMAN          |
| Q86SQ0                                                                                       | 2             | 2.9222           | K.NNLIMMLQR.E                    | 1            | PHLB2_HUMAN          |
| Q86SQ0                                                                                       | 2             | 2.8416           | K.NNLIM#MLQR.E                   | 2            | PHLB2_HUMAN          |
| Q86SQ0                                                                                       | 2             | 3.1416           | K.NNLIMM#LQR.E                   | 1            | PHLB2_HUMAN          |
| Q86SQ0                                                                                       | 2             | 3.3535           | K.EGLYLSDTLPR.K                  | 2            | PHLB2_HUMAN          |
| <b><i>Pleiotropic regulator 1 - Homo sapiens (Human)</i></b>                                 |               |                  |                                  |              |                      |
| O43660                                                                                       | 2             | 3.7578           | R.MPSESAAQSLAVALPLQTK.A          | 1            | PLRG1_HUMAN          |
| <b><i>PLEKHG3 protein - Homo sapiens (Human)</i></b>                                         |               |                  |                                  |              |                      |
| A1L390                                                                                       | 3             | 3.8601           | R.FNSLPRPDPEPVPVGSK.R            | 1            | A1L390_HUMAN         |
| A1L390                                                                                       | 2             | 2.9548           | R.FFFNPSAVSQR.T                  | 1            | A1L390_HUMAN         |
| A1L390                                                                                       | 3             | 3.8017           | R.QVGSRPTSWALFELPGPSQAVK.G       | 1            | A1L390_HUMAN         |
| A1L390                                                                                       | 2             | 3.4724           | R.SPLSPTETFSPWDVR.E              | 1            | A1L390_HUMAN         |
| A1L390                                                                                       | 2             | 4.1566           | K.IWEGMESSGGSPGK.G               | 2            | A1L390_HUMAN         |

| <i>Accession No*</i>                                                                   | <i>Charge</i> | <i>XC(Max)**</i> | <i>Peptide*</i>                   | <i>TC***</i> | <i>Reference No*</i> |
|----------------------------------------------------------------------------------------|---------------|------------------|-----------------------------------|--------------|----------------------|
| A1L390                                                                                 | 2             | 2.7865           | R.DPADPSQQGR.V                    | 2            | A1L390_HUMAN         |
| <b><i>PNAS-I17 - Homo sapiens (Human)</i></b>                                          |               |                  |                                   |              |                      |
| Q9HB66                                                                                 | 2             | 2.9206           | K.NDDIPEQDSLGLSNLQK.S             | 2            | Q9HB66_HUMAN         |
| <b><i>Podocin - Homo sapiens (Human)</i></b>                                           |               |                  |                                   |              |                      |
| Q9NP85                                                                                 | 2             | 4.1123           | R.APAATVVDVDEVR.G                 | 2            | PODO_HUMAN           |
| Q9NP85                                                                                 | 2             | 4.7112           | R.GRQEAGPEPSGSGR.A                | 1            | PODO_HUMAN           |
| <b><i>Poliovirus receptor precursor - Homo sapiens (Human)</i></b>                     |               |                  |                                   |              |                      |
| P15151                                                                                 | 2             | 3.5354           | R.ENSSSQDPQTEGTR.-                | 2            | PVR_HUMAN            |
| P15151                                                                                 | 2             | 2.7452           | K.VQLTGEPVPMAR.C                  | 1            | PVR_HUMAN            |
| <b><i>Poliovirus receptor-related protein 1 precursor - Homo sapiens (Human)</i></b>   |               |                  |                                   |              |                      |
| Q15223                                                                                 | 2             | 3.893            | K.PTNWIEGTQAVLR.A                 | 1            | PVRL1_HUMAN          |
| Q15223                                                                                 | 3             | 4.3609           | R.TLGYQYDPEQLDLAENMVSQNDGSFISKK.E | 2            | PVRL1_HUMAN          |
| Q15223                                                                                 | 3             | 3.775            | K.YDEDAKRPYFTVDEAEAR.Q            | 1            | PVRL1_HUMAN          |
| Q15223                                                                                 | 2             | 3.4991           | K.QNVAIYNPSM#GVSVLAPYR.E          | 1            | PVRL1_HUMAN          |
| <b><i>Poliovirus receptor-related protein 3 precursor - Homo sapiens (Human)</i></b>   |               |                  |                                   |              |                      |
| Q9NQS3                                                                                 | 2             | 4.3175           | R.FERPMDYYEDLK.M                  | 3            | PVRL3_HUMAN          |
| <b><i>Poliovirus receptor-related protein 4 precursor - Homo sapiens (Human)</i></b>   |               |                  |                                   |              |                      |
| Q96NY8                                                                                 | 2             | 2.894            | R.VDAGEGAQELALLHSK.Y              | 1            | PVRL4_HUMAN          |
| <b><i>Poly [ADP-ribose] polymerase 1 - Homo sapiens (Human)</i></b>                    |               |                  |                                   |              |                      |
| P09874                                                                                 | 2             | 2.8641           | K.AEPVEVVAPR.G                    | 1            | PARP1_HUMAN          |
| P09874                                                                                 | 2             | 4.2811           | R.VVSEDFLQDVSASTK.S               | 1            | PARP1_HUMAN          |
| <b><i>Poly(rC)-binding protein 1 - Homo sapiens (Human)</i></b>                        |               |                  |                                   |              |                      |
| Q15365                                                                                 | 2             | 2.7221           | R.QGANINEIR.Q                     | 1            | PCBP1_HUMAN          |
| Q15365                                                                                 | 2             | 3.3079           | K.IANPVEGSSGR.Q                   | 5            | PCBP1_HUMAN          |
| Q15365                                                                                 | 2             | 5.9239           | R.QVTITGSAASISLAQYLINAR.L         | 7            | PCBP1_HUMAN          |
| <b><i>Polyadenylate-binding protein 1 - Homo sapiens (Human)</i></b>                   |               |                  |                                   |              |                      |
| P11940                                                                                 | 3             | 4.4404           | R.VANTSTQTM#GPRPAAAAAATPAVR.T     | 2            | PABP1_HUMAN          |
| P11940                                                                                 | 2             | 3.3807           | R.PAAAAAATPAVR.T                  | 1            | PABP1_HUMAN          |
| <b><i>Polyadenylate-binding protein 2 - Homo sapiens (Human)</i></b>                   |               |                  |                                   |              |                      |
| Q86U42                                                                                 | 2             | 3.1202           | R.TSLALDESLFR.G                   | 3            | PABP2_HUMAN          |
| Q86U42                                                                                 | 1             | 2.3526           | K.ELQNEVEK.Q                      | 1            | PABP2_HUMAN          |
| <b><i>Polycystic kidney and hepatic disease 1 precursor - Homo sapiens (Human)</i></b> |               |                  |                                   |              |                      |



| <i>Accession No*</i>                                                             | <i>Charge</i> | <i>XC(Max)**</i> | <i>Peptide*</i>                     | <i>TC***</i> | <i>Reference No*</i> |
|----------------------------------------------------------------------------------|---------------|------------------|-------------------------------------|--------------|----------------------|
| Q8TCZ9                                                                           | 2             | 2.7546           | K.EDTVVGEDMRMKVMLGK.V               | 1            | PKHD1_HUMAN          |
| <b><i>Polyglutamine-binding protein 1 - Homo sapiens (Human)</i></b>             |               |                  |                                     |              |                      |
| O60828                                                                           | 3             | 4.6808           | R.KDEELDPMDPSSYSYDAPR.G             | 2            | PQBP1_HUMAN          |
| O60828                                                                           | 3             | 5.6641           | R.KDEELDPM#DPSSYSYDAPR.G            | 3            | PQBP1_HUMAN          |
| O60828                                                                           | 2             | 2.8477           | R.REELAPYPK.S                       | 5            | PQBP1_HUMAN          |
| <b><i>Polyhomeotic-like protein 3 - Homo sapiens (Human)</i></b>                 |               |                  |                                     |              |                      |
| Q8NDX5                                                                           | 2             | 3.4434           | K.MGYANEFLR.S                       | 2            | PHC3_HUMAN           |
| <b><i>Polymerase delta-interacting protein 3 - Homo sapiens (Human)</i></b>      |               |                  |                                     |              |                      |
| Q9BY77                                                                           | 3             | 4.4941           | R.RVNSASSSNPPAEVDPDTILK.A           | 1            | PDIP3_HUMAN          |
| Q9BY77                                                                           | 2             | 2.746            | K.VVQNDAYTAPALPSSIR.T               | 1            | PDIP3_HUMAN          |
| <b><i>Polymerase I and transcript release factor - Homo sapiens (Human)</i></b>  |               |                  |                                     |              |                      |
| Q6NZI2                                                                           | 3             | 3.8528           | K.ATEMVEVGADDDEGGAERGEAGDLRR.G      | 1            | PTRF_HUMAN           |
| Q6NZI2                                                                           | 3             | 3.9341           | K.ATEMVEVGADDDEGGAERGEAGDLR.R       | 7            | PTRF_HUMAN           |
| Q6NZI2                                                                           | 1             | 2.2705           | R.EGQVEVLK.A                        | 1            | PTRF_HUMAN           |
| Q6NZI2                                                                           | 3             | 4.2981           | K.IREGQVEVLK.A                      | 4            | PTRF_HUMAN           |
| Q6NZI2                                                                           | 2             | 4.3143           | K.ATEM#VEVGADDDEGGAER.G             | 1            | PTRF_HUMAN           |
| Q6NZI2                                                                           | 2             | 6.8526           | K.IIGAVDQIQLTQAQLEER.Q              | 6            | PTRF_HUMAN           |
| Q6NZI2                                                                           | 2             | 2.7709           | K.AHATTSNTVSK.L                     | 1            | PTRF_HUMAN           |
| Q6NZI2                                                                           | 3             | 3.8607           | K.ATEM#VEVGADDDEGGAERGEAGDLR.R      | 1            | PTRF_HUMAN           |
| <b><i>Polymeric-immunoglobulin receptor precursor - Homo sapiens (Human)</i></b> |               |                  |                                     |              |                      |
| P01833                                                                           | 3             | 3.9466           | R.SSKEEAEMAYKDFLLQSSTVAAEAQDGPQEA.- | 1            | PIGR_HUMAN           |
| P01833                                                                           | 2             | 4.9057           | R.ASVDSGSSEEQGGSSR.A                | 6            | PIGR_HUMAN           |
| <b><i>Potassium channel modulatory factor 1 - Homo sapiens (Human)</i></b>       |               |                  |                                     |              |                      |
| Q9BWK2                                                                           | 2             | 2.7493           | R.DLDESSGVR.H                       | 1            | Q9BWK2_HUMAN         |
| Q9BWK2                                                                           | 2             | 2.8761           | R.SLFVQELLLSTLVR.E                  | 1            | Q9BWK2_HUMAN         |
| Q9BWK2                                                                           | 2             | 2.9121           | R.EAMDPIAELLSQLSGVR.R               | 1            | Q9BWK2_HUMAN         |
| <b><i>Potassium channel subfamily K member 12 - Homo sapiens (Human)</i></b>     |               |                  |                                     |              |                      |
| Q9HB15                                                                           | 2             | 2.7608           | R.RLSGELISM#R.D                     | 1            | KCNKC_HUMAN          |
| <b><i>Potassium channel subfamily K member 5 - Homo sapiens (Human)</i></b>      |               |                  |                                     |              |                      |
| O95279                                                                           | 2             | 3.2838           | K.SSLEDNLAGEESPQQGAEAK.A            | 2            | KCNK5_HUMAN          |
| O95279                                                                           | 2             | 3.7386           | R.APEDSSPAPEVFMNQLDR.I              | 1            | KCNK5_HUMAN          |
| <b><i>Prefoldin subunit 1 - Homo sapiens (Human)</i></b>                         |               |                  |                                     |              |                      |
| O60925                                                                           | 1             | 2.4254           | K.AFTELQAK.V                        | 1            | PFD1_HUMAN           |

| <i>Accession No*</i>                                                           | <i>Charge</i> | <i>XC(Max)**</i> | <i>Peptide*</i>         | <i>TC***</i> | <i>Reference No*</i> |
|--------------------------------------------------------------------------------|---------------|------------------|-------------------------|--------------|----------------------|
| O60925                                                                         | 2             | 3.0663           | K.LADIQIEQLNR.T         | 1            | PFD1_HUMAN           |
| O60925                                                                         | 2             | 2.8936           | K.VIDTQQK.V             | 1            | PFD1_HUMAN           |
| <b><i>Prefoldin subunit 2 - Homo sapiens (Human)</i></b>                       |               |                  |                         |              |                      |
| Q9UHV9                                                                         | 2             | 3.7504           | R.MVGGVLVER.T           | 2            | PFD2_HUMAN           |
| Q9UHV9                                                                         | 3             | 4.3668           | K.GAVSAEQVIAGFNR.L      | 4            | PFD2_HUMAN           |
| Q9UHV9                                                                         | 2             | 4.3137           | K.EVLPALENNKEIQK.I      | 1            | PFD2_HUMAN           |
| Q9UHV9                                                                         | 2             | 3.6825           | R.LMGEDEKPAAK.E         | 4            | PFD2_HUMAN           |
| Q9UHV9                                                                         | 2             | 4.9893           | K.IIETLTQQQLQAK.G       | 2            | PFD2_HUMAN           |
| <b><i>Prefoldin subunit 3 - Homo sapiens (Human)</i></b>                       |               |                  |                         |              |                      |
| P61758                                                                         | 2             | 3.2279           | K.KLDEQYQK.Y            | 6            | PFD3_HUMAN           |
| P61758                                                                         | 3             | 4.7647           | R.LHLGIPEAVFVEDVDSFMK.Q | 3            | PFD3_HUMAN           |
| <b><i>Prefoldin subunit 4 - Homo sapiens (Human)</i></b>                       |               |                  |                         |              |                      |
| Q9NQP4                                                                         | 2             | 4.9387           | K.NLQEEIDALESR.V        | 6            | PFD4_HUMAN           |
| Q9NQP4                                                                         | 2             | 4.9642           | K.KAAAEDVNVTFEDQQK.I    | 2            | PFD4_HUMAN           |
| Q9NQP4                                                                         | 1             | 2.2414           | R.VLADLK.V              | 1            | PFD4_HUMAN           |
| Q9NQP4                                                                         | 1             | 2.1567           | K.VQLYAK.F              | 1            | PFD4_HUMAN           |
| Q9NQP4                                                                         | 2             | 3.8776           | R.ITELKEEIEVK.K         | 2            | PFD4_HUMAN           |
| Q9NQP4                                                                         | 2             | 5.2061           | K.AAAEDVNVTFEDQQK.I     | 6            | PFD4_HUMAN           |
| <b><i>Prefoldin subunit 6 - Homo sapiens (Human)</i></b>                       |               |                  |                         |              |                      |
| O15212                                                                         | 2             | 4.4657           | R.ETLAQLQQEFQR.A        | 7            | PFD6_HUMAN           |
| <b><i>Pre-mRNA 3'-end-processing factor FIP1 - Homo sapiens (Human)</i></b>    |               |                  |                         |              |                      |
| Q6UN15                                                                         | 3             | 5.0982           | R.KPGADLSDFNYGFNEDTWK.A | 2            | FIP1_HUMAN           |
| Q6UN15                                                                         | 2             | 3.3286           | R.ANENSNIQVLSER.S       | 2            | FIP1_HUMAN           |
| Q6UN15                                                                         | 2             | 4.9021           | K.TGAPQYGSYGTAPVNLNIK.T | 5            | FIP1_HUMAN           |
| Q6UN15                                                                         | 2             | 3.3819           | R.MGLEVIPVTSTTNK.I      | 4            | FIP1_HUMAN           |
| Q6UN15                                                                         | 2             | 3.8369           | R.M#GLEVIPVTSTTNK.I     | 2            | FIP1_HUMAN           |
| Q6UN15                                                                         | 2             | 3.3073           | K.AEFTSPPSLFK.T         | 1            | FIP1_HUMAN           |
| Q6UN15                                                                         | 3             | 4.1209           | R.TGNSEKETALPSTK.A      | 1            | FIP1_HUMAN           |
| <b><i>Pre-mRNA cleavage complex 2 protein Pcf11 - Homo sapiens (Human)</i></b> |               |                  |                         |              |                      |
| O94913                                                                         | 3             | 3.9434           | K.TEEERPQETTQNHSTK.S    | 1            | PCF11_HUMAN          |
| <b><i>Pre-mRNA-processing factor 40 homolog A - Homo sapiens (Human)</i></b>   |               |                  |                         |              |                      |
| O75400                                                                         | 2             | 3.4101           | K.SDSGKPYYYNSQTK.E      | 1            | PRP40_HUMAN          |
| <b><i>Pre-mRNA-processing factor 6 - Homo sapiens (Human)</i></b>              |               |                  |                         |              |                      |

| <i>Accession No*</i>                                                                           | <i>Charge</i> | <i>XC(Max)**</i> | <i>Peptide*</i>                     | <i>TC***</i> | <i>Reference No*</i> |
|------------------------------------------------------------------------------------------------|---------------|------------------|-------------------------------------|--------------|----------------------|
| Q94906                                                                                         | 2             | 2.7444           | R.DANDPVDDR.H                       | 1            | PRP6_HUMAN           |
| <b><i>Pre-mRNA-splicing factor ATP-dependent RNA helicase PRP16 - Homo sapiens (Human)</i></b> |               |                  |                                     |              |                      |
| Q92620                                                                                         | 2             | 4.1439           | R.PSLLGLDLLASLK.R                   | 1            | PRP16_HUMAN          |
| Q92620                                                                                         | 2             | 3.121            | R.RNEPESPR.H                        | 2            | PRP16_HUMAN          |
| Q92620                                                                                         | 2             | 2.7453           | R.VETPSHPGGVSEEFWER.S               | 1            | PRP16_HUMAN          |
| Q92620                                                                                         | 2             | 3.5325           | R.SQWESPSPTPSYR.D                   | 1            | PRP16_HUMAN          |
| <b><i>Pre-mRNA-splicing factor ISY1 homolog - Homo sapiens (Human)</i></b>                     |               |                  |                                     |              |                      |
| Q9ULR0                                                                                         | 3             | 3.7238           | R.IKELGGPDYGK.V                     | 2            | ISY1_HUMAN           |
| Q9ULR0                                                                                         | 2             | 4.415            | K.VAQIQNAGLGEFR.I                   | 5            | ISY1_HUMAN           |
| <b><i>Prenylcysteine oxidase 1 precursor - Homo sapiens (Human)</i></b>                        |               |                  |                                     |              |                      |
| Q9UHG3                                                                                         | 3             | 3.7976           | R.YQSHDYAFSSVEK.L                   | 1            | PCYOX_HUMAN          |
| Q9UHG3                                                                                         | 2             | 3.9528           | K.FLNEMIAPVMR.V                     | 3            | PCYOX_HUMAN          |
| Q9UHG3                                                                                         | 2             | 2.7349           | R.TLLETLQK.A                        | 1            | PCYOX_HUMAN          |
| <b><i>Pre-rRNA-processing protein TSR2 homolog - Homo sapiens (Human)</i></b>                  |               |                  |                                     |              |                      |
| Q969E8                                                                                         | 2             | 4.1808           | K.WLGGAVEDYFMR.N                    | 4            | TSR2_HUMAN           |
| Q969E8                                                                                         | 2             | 4.483            | K.WLGGAVEDYFM#R.N                   | 2            | TSR2_HUMAN           |
| <b><i>PRKC apoptosis WTI regulator protein - Homo sapiens (Human)</i></b>                      |               |                  |                                     |              |                      |
| Q96IZ0                                                                                         | 2             | 3.5814           | R.DLDDIEDENEQLKQENK.T               | 2            | PAWR_HUMAN           |
| Q96IZ0                                                                                         | 2             | 3.178            | K.STTSVSEEDVSSR.Y                   | 2            | PAWR_HUMAN           |
| Q96IZ0                                                                                         | 2             | 2.8471           | K.EEM#IGKLKEEIDLLNR.D               | 1            | PAWR_HUMAN           |
| Q96IZ0                                                                                         | 2             | 5.7628           | R.DANVSGTLVSSSTLEK.K                | 6            | PAWR_HUMAN           |
| Q96IZ0                                                                                         | 2             | 3.8709           | R.LMQDKEEM#IGK.L                    | 2            | PAWR_HUMAN           |
| Q96IZ0                                                                                         | 2             | 4.8805           | R.LMQDKEEMIGK.L                     | 4            | PAWR_HUMAN           |
| Q96IZ0                                                                                         | 2             | 3.4151           | R.TSSGLGGSTTDFLEEWK.A               | 2            | PAWR_HUMAN           |
| Q96IZ0                                                                                         | 3             | 5.4898           | R.RSEDEPPAASASAAPPPQRDEEEDPGVPEK.G  | 1            | PAWR_HUMAN           |
| Q96IZ0                                                                                         | 3             | 4.2341           | R.SEDEPPAASASAAPPPQRDEEEDPGVPEK.G   | 2            | PAWR_HUMAN           |
| Q96IZ0                                                                                         | 3             | 5.5096           | R.KREDAITQQNTIQNEAVNLLDPGSSYLLQEPPR | 2            | PAWR_HUMAN           |
| <b><i>PRKR interacting protein 1 - Homo sapiens (Human)</i></b>                                |               |                  |                                     |              |                      |
| Q96CF8                                                                                         | 2             | 3.584            | K.IAAEEQTAKR.R                      | 1            | Q96CF8_HUMAN         |
| <b><i>Probable ATP-dependent RNA helicase DDX10 - Homo sapiens (Human)</i></b>                 |               |                  |                                     |              |                      |
| Q13206                                                                                         | 2             | 6.0441           | K.SAIKDAEEDDDTGGINLHK.A             | 8            | DDX10_HUMAN          |
| Q13206                                                                                         | 2             | 4.5416           | R.SNSEVEDVGPTSHNR.K                 | 1            | DDX10_HUMAN          |
| <b><i>Probable ATP-dependent RNA helicase DDX27 - Homo sapiens (Human)</i></b>                 |               |                  |                                     |              |                      |

| <i>Accession No*</i>                                                                           | <i>Charge</i> | <i>XC(Max)**</i> | <i>Peptide*</i>               | <i>TC***</i> | <i>Reference No*</i> |
|------------------------------------------------------------------------------------------------|---------------|------------------|-------------------------------|--------------|----------------------|
| Q96GQ7                                                                                         | 2             | 3.7354           | R.SADFNPDFVFTEK.E             | 3            | DDX27_HUMAN          |
| <b><i>Probable ATP-dependent RNA helicase DDX46 - Homo sapiens (Human)</i></b>                 |               |                  |                               |              |                      |
| Q7L014                                                                                         | 2             | 3.1821           | K.TIAEQLAEK.I                 | 1            | DDX46_HUMAN          |
| Q7L014                                                                                         | 2             | 4.7546           | K.DM#AAPGTSSVPAPTAGNAEK.L     | 3            | DDX46_HUMAN          |
| Q7L014                                                                                         | 2             | 3.0126           | K.DMAAPGTSSVPAPTAGNAEK.L      | 3            | DDX46_HUMAN          |
| Q7L014                                                                                         | 2             | 3.5051           | K.FDETEQALANER.K              | 2            | DDX46_HUMAN          |
| Q7L014                                                                                         | 3             | 3.8861           | R.VKDMAAPGTSSVPAPTAGNAEK.L    | 1            | DDX46_HUMAN          |
| <b><i>Probable ATP-dependent RNA helicase DDX6 - Homo sapiens (Human)</i></b>                  |               |                  |                               |              |                      |
| P26196                                                                                         | 3             | 6.3907           | R.GPVKPTGGPGGGGTQTQQQM#NQLK.N | 3            | DDX6_HUMAN           |
| P26196                                                                                         | 3             | 5.4988           | R.GPVKPTGGPGGGGTQTQQQMQLK.N   | 1            | DDX6_HUMAN           |
| <b><i>Probable D-lactate dehydrogenase, mitochondrial precursor - Homo sapiens (Human)</i></b> |               |                  |                               |              |                      |
| Q86WU2                                                                                         | 2             | 3.8191           | K.AVLDPQGLMNPVK.V             | 4            | LDHD_HUMAN           |
| <b><i>Probable D-tyrosyl-tRNA(Tyr) deacylase 1 - Homo sapiens (Human)</i></b>                  |               |                  |                               |              |                      |
| Q8TEA8                                                                                         | 2             | 4.5485           | R.SASSGAEGDVSSEREP.-          | 4            | DTD1_HUMAN           |
| <b><i>Probable histone acetyltransferase MYST1 - Homo sapiens (Human)</i></b>                  |               |                  |                               |              |                      |
| Q9H7Z6                                                                                         | 3             | 5.6396           | R.VNDQEGREEFYVHYVGFNR.R       | 2            | MYST1_HUMAN          |
| Q9H7Z6                                                                                         | 2             | 3.4766           | K.YLSELAEQPERK.I              | 1            | MYST1_HUMAN          |
| <b><i>Probable palmitoyltransferase ZDHHC5 - Homo sapiens (Human)</i></b>                      |               |                  |                               |              |                      |
| Q9C0B5                                                                                         | 2             | 2.7049           | R.HIVASLQER.E                 | 1            | ZDHC5_HUMAN          |
| Q9C0B5                                                                                         | 3             | 4.1821           | R.GDSLKEPTSIAESSR.H           | 3            | ZDHC5_HUMAN          |
| Q9C0B5                                                                                         | 2             | 5.3001           | K.SAQTGFELGQLQSIR.S           | 3            | ZDHC5_HUMAN          |
| Q9C0B5                                                                                         | 2             | 3.1264           | K.SLGSASPGPGQPPLSSPTR.G       | 2            | ZDHC5_HUMAN          |
| Q9C0B5                                                                                         | 2             | 4.0112           | R.GVGSPEPGPTAPYLGR.S          | 4            | ZDHC5_HUMAN          |
| <b><i>Probable peptidase KIAA1815 - Homo sapiens (Human)</i></b>                               |               |                  |                               |              |                      |
| Q7Z2K6                                                                                         | 2             | 2.8153           | R.EGAAAAPPPER.E               | 1            | K1815_HUMAN          |
| <b><i>Probable protein BRICK1 - Homo sapiens (Human)</i></b>                                   |               |                  |                               |              |                      |
| Q8WUW1                                                                                         | 2             | 3.1358           | R.RIEYIEAR.V                  | 2            | BRK1_HUMAN           |
| <b><i>Probable RNA-binding protein 25 - Homo sapiens (Human)</i></b>                           |               |                  |                               |              |                      |
| P49756                                                                                         | 2             | 3.0553           | K.FEDEDSDDVPR.K               | 2            | RBM25_HUMAN          |
| P49756                                                                                         | 2             | 3.2022           | R.DREEDEEDAYER.R              | 1            | RBM25_HUMAN          |
| P49756                                                                                         | 2             | 2.7744           | R.LLAEGHPDPDAELQR.M           | 1            | RBM25_HUMAN          |
| <b><i>Probable ubiquitin carboxyl-terminal hydrolase FAF-X - Homo sapiens (Human)</i></b>      |               |                  |                               |              |                      |

| <i>Accession No*</i>                                                                             | <i>Charge</i> | <i>XC(Max)**</i> | <i>Peptide*</i>          | <i>TC***</i> | <i>Reference No*</i> |
|--------------------------------------------------------------------------------------------------|---------------|------------------|--------------------------|--------------|----------------------|
| Q93008                                                                                           | 2             | 3.4535           | R.AQENYEGSEEVSPQTKDQ.-   | 2            | USP9X_HUMAN          |
| <b><i>Profilin-1 - Homo sapiens (Human)</i></b>                                                  |               |                  |                          |              |                      |
| P07737                                                                                           | 2             | 2.7257           | K.TFVNITPAEVGVLVGKDR.S   | 1            | PROF1_HUMAN          |
| P07737                                                                                           | 2             | 4.7049           | R.SSFYVNGLTGGQK.C        | 6            | PROF1_HUMAN          |
| P07737                                                                                           | 2             | 3.6362           | K.DSPSVWAAVPGK.T         | 4            | PROF1_HUMAN          |
| P07737                                                                                           | 2             | 4.417            | R.DSLLQDGEFSM#DLR.T      | 2            | PROF1_HUMAN          |
| P07737                                                                                           | 2             | 3.5174           | K.STGGAPTFNVTVK.T        | 3            | PROF1_HUMAN          |
| P07737                                                                                           | 2             | 4.5697           | K.TFVNITPAEVGVLVGK.D     | 1            | PROF1_HUMAN          |
| P07737                                                                                           | 2             | 3.9052           | K.TDKTLVLLMGK.E          | 6            | PROF1_HUMAN          |
| P07737                                                                                           | 1             | 3.0522           | K.TLVLLMGK.E             | 2            | PROF1_HUMAN          |
| <b><i>Programmed cell death protein 5 - Homo sapiens (Human)</i></b>                             |               |                  |                          |              |                      |
| O14737                                                                                           | 2             | 4.0352           | K.VSEQGLIEILK.V          | 2            | PDCD5_HUMAN          |
| O14737                                                                                           | 1             | 2.9706           | R.YGQLSEK.V              | 12           | PDCD5_HUMAN          |
| O14737                                                                                           | 2             | 3.5012           | R.KVMDSDEDDDY.-          | 2            | PDCD5_HUMAN          |
| O14737                                                                                           | 2             | 4.2378           | K.VSEQGLIEILK.K          | 6            | PDCD5_HUMAN          |
| O14737                                                                                           | 2             | 5.2664           | R.NSILAQVLDQSAR.A        | 11           | PDCD5_HUMAN          |
| O14737                                                                                           | 2             | 3.8236           | R.LSNLALVKPEK.T          | 5            | PDCD5_HUMAN          |
| O14737                                                                                           | 2             | 4.0534           | K.AVENYLIQM#AR.Y         | 5            | PDCD5_HUMAN          |
| O14737                                                                                           | 2             | 3.3712           | K.AVENYLIQMAR.Y          | 3            | PDCD5_HUMAN          |
| <b><i>Prolargin precursor - Homo sapiens (Human)</i></b>                                         |               |                  |                          |              |                      |
| P51888                                                                                           | 2             | 3.3029           | K.NQLEEVPSALPR.N         | 2            | PRELP_HUMAN          |
| <b><i>Proline synthetase co-transcribed bacterial homolog protein - Homo sapiens (Human)</i></b> |               |                  |                          |              |                      |
| O94903                                                                                           | 2             | 3.5398           | K.APLEVAQEH.-            | 4            | PROSC_HUMAN          |
| O94903                                                                                           | 2             | 4.6604           | K.LMAVPNLFMLETVDSVK.L    | 3            | PROSC_HUMAN          |
| O94903                                                                                           | 2             | 2.8435           | R.IGSTIFGER.D            | 2            | PROSC_HUMAN          |
| O94903                                                                                           | 2             | 3.9722           | K.LM#AVPNLFMLETVDSVK.L   | 2            | PROSC_HUMAN          |
| O94903                                                                                           | 2             | 3.9134           | R.TFGENYVQELLEK.A        | 4            | PROSC_HUMAN          |
| <b><i>Proline-rich acidic protein 1 - Homo sapiens (Human)</i></b>                               |               |                  |                          |              |                      |
| Q5VWY4                                                                                           | 3             | 5.163            | R.VVEPPEKDDQLVVLFPVQPK.L | 4            | Q5VWY4_HUMAN         |
| <b><i>Proline-rich AKT1 substrate 1 - Homo sapiens (Human)</i></b>                               |               |                  |                          |              |                      |
| Q96B36                                                                                           | 2             | 3.0746           | K.SLPVSVPVWGFK.E         | 2            | AKTS1_HUMAN          |
| Q96B36                                                                                           | 2             | 3.4885           | R.SSDEENGPPSSPDLDR.I     | 2            | AKTS1_HUMAN          |
| <b><i>Proline-rich protein 8 - Homo sapiens (Human)</i></b>                                      |               |                  |                          |              |                      |

| <i>Accession No*</i>                                                          | <i>Charge</i> | <i>XC(Max)**</i> | <i>Peptide*</i>                 | <i>TC***</i> | <i>Reference No*</i> |
|-------------------------------------------------------------------------------|---------------|------------------|---------------------------------|--------------|----------------------|
| Q9NSV0                                                                        | 2             | 3.2698           | K.NQDVSISNVQPK.T                | 1            | PRR8_HUMAN           |
| <b><i>Proline-rich protein PRCC - Homo sapiens (Human)</i></b>                |               |                  |                                 |              |                      |
| Q92733                                                                        | 2             | 4.9586           | K.TSSLAPVVGTTTTTPSPSAIK.A       | 2            | PRCC_HUMAN           |
| Q92733                                                                        | 2             | 6.0356           | K.TILQGSSEGTGLSALLPQPK.N        | 6            | PRCC_HUMAN           |
| <b><i>Prominin-2. - Homo sapiens (Human)</i></b>                              |               |                  |                                 |              |                      |
| Q8N271                                                                        | 2             | 2.8772           | K.VDTQSLDLLSSAAR.R              | 1            | Q8N271_HUMAN         |
| <b><i>ProSAAS precursor - Homo sapiens (Human)</i></b>                        |               |                  |                                 |              |                      |
| Q9UHG2                                                                        | 2             | 3.77             | R.AEAQEAEDQQR.V                 | 2            | PCSK1_HUMAN          |
| <b><i>Prostaglandin E synthase 3 - Homo sapiens (Human)</i></b>               |               |                  |                                 |              |                      |
| Q15185                                                                        | 2             | 4.0074           | R.KGESGQSWPR.L                  | 6            | TEBP_HUMAN           |
| <b><i>Proteasome - Homo sapiens (Human)</i></b>                               |               |                  |                                 |              |                      |
| Q5VWC4                                                                        | 3             | 4.6983           | R.AAAASAAEAGIATTGTEGERDSDALLK.M | 2            | Q5VWC4_HUMAN         |
| <b><i>Proteasome activator complex subunit 1 - Homo sapiens (Human)</i></b>   |               |                  |                                 |              |                      |
| Q06323                                                                        | 3             | 4.4759           | K.ISEDAFLKEPALNEANLSNLK.A       | 1            | PSME1_HUMAN          |
| Q06323                                                                        | 2             | 3.6004           | K.APLDIPVPDPVKEK.E              | 2            | PSME1_HUMAN          |
| Q06323                                                                        | 3             | 6.8538           | K.KISEDAFLKEPALNEANLSNLK.A      | 2            | PSME1_HUMAN          |
| Q06323                                                                        | 2             | 4.2397           | K.TENLLGSYFPK.K                 | 6            | PSME1_HUMAN          |
| <b><i>Proteasome subunit alpha type 5 - Homo sapiens (Human)</i></b>          |               |                  |                                 |              |                      |
| P28066                                                                        | 2             | 3.0017           | R.ITSPLEMPSSIEK.I               | 1            | PSA5_HUMAN           |
| <b><i>Proteasome subunit beta type 6 precursor - Homo sapiens (Human)</i></b> |               |                  |                                 |              |                      |
| P28072                                                                        | 2             | 3.0533           | R.QVLLGDQIPK.F                  | 1            | PSB6_HUMAN           |
| P28072                                                                        | 2             | 4.411            | R.LAAIAESGVER.Q                 | 3            | PSB6_HUMAN           |
| P28072                                                                        | 2             | 3.4907           | R.TTTGSYIANR.V                  | 3            | PSB6_HUMAN           |
| P28072                                                                        | 2             | 3.0403           | R.DGSSGGVIR.L                   | 2            | PSB6_HUMAN           |
| <b><i>Protein 4.1 - Homo sapiens (Human)</i></b>                              |               |                  |                                 |              |                      |
| P11171                                                                        | 3             | 4.2757           | K.KEDEPPEQAEPEPTEAWKVEK.T       | 1            | 41_HUMAN             |
| <b><i>Protein ADRM1 - Homo sapiens (Human)</i></b>                            |               |                  |                                 |              |                      |
| Q16186                                                                        | 2             | 3.9958           | K.DKKDEEEDMSLD.-                | 6            | ADRM1_HUMAN          |
| Q16186                                                                        | 2             | 2.8378           | K.DKKDEEEDM#SLD.-               | 1            | ADRM1_HUMAN          |
| Q16186                                                                        | 3             | 3.7358           | K.AM#QNNAKPEQK.E                | 3            | ADRM1_HUMAN          |
| Q16186                                                                        | 2             | 3.4297           | K.AMQNNAKPEQK.E                 | 4            | ADRM1_HUMAN          |
| <b><i>Protein ALO17 - Homo sapiens (Human)</i></b>                            |               |                  |                                 |              |                      |

| <i>Accession No*</i>                                               | <i>Charge</i> | <i>XC(Max)**</i> | <i>Peptide*</i>                  | <i>TC***</i> | <i>Reference No*</i> |
|--------------------------------------------------------------------|---------------|------------------|----------------------------------|--------------|----------------------|
| Q9HCF4                                                             | 2             | 4.7303           | R.GLSQEGTGPPTSAGEGHSR.T          | 4            | ALO17_HUMAN          |
| Q9HCF4                                                             | 2             | 3.2299           | K.TKDEMAAAEEK.V                  | 2            | ALO17_HUMAN          |
| Q9HCF4                                                             | 2             | 2.8097           | K.ASWTVQESK.K                    | 1            | ALO17_HUMAN          |
| Q9HCF4                                                             | 2             | 2.7643           | K.TKDEM#AAAEEK.V                 | 1            | ALO17_HUMAN          |
| Q9HCF4                                                             | 2             | 4.5399           | R.TEDAAQELLLPESK.G               | 3            | ALO17_HUMAN          |
| <b><i>Protein archease - Homo sapiens (Human)</i></b>              |               |                  |                                  |              |                      |
| Q8IWT0                                                             | 2             | 3.1668           | K.FSADEFFIPR.E                   | 1            | ARCH_HUMAN           |
| <b><i>Protein ARMET precursor - Homo sapiens (Human)</i></b>       |               |                  |                                  |              |                      |
| P55145                                                             | 3             | 4.0395           | K.IINEVSKPLAHHIPVEK.I            | 1            | ARMET_HUMAN          |
| P55145                                                             | 2             | 2.7438           | R.KINELMPK.Y                     | 1            | ARMET_HUMAN          |
| <b><i>PProtein Associated with Tlr4 - Homo sapiens (Human)</i></b> |               |                  |                                  |              |                      |
| Q8N129                                                             | 2             | 4.2101           | K.LLSTELQAELSR.T                 | 2            | Q8N129_HUMAN         |
| Q8N129                                                             | 3             | 6.0371           | R.SREVLELGQVLDTGKR.K             | 2            | Q8N129_HUMAN         |
| <b><i>Protein bicaudal C homolog 1 - Homo sapiens (Human)</i></b>  |               |                  |                                  |              |                      |
| Q9H694                                                             | 2             | 4.0154           | R.LLSDPELSATESPLADK.K            | 2            | BICC1_HUMAN          |
| Q9H694                                                             | 2             | 3.2805           | K.IMEENTNTQIAWPSK.L              | 1            | BICC1_HUMAN          |
| Q9H694                                                             | 2             | 3.8566           | R.TPTNTWSGLGFSK.S                | 2            | BICC1_HUMAN          |
| <b><i>Protein bicaudal D homolog 2 - Homo sapiens (Human)</i></b>  |               |                  |                                  |              |                      |
| Q8TD16                                                             | 2             | 2.7652           | R.LVMEAQPEWLR.A                  | 1            | BICD2_HUMAN          |
| <b><i>Protein C10 - Homo sapiens (Human)</i></b>                   |               |                  |                                  |              |                      |
| Q99622                                                             | 3             | 5.0198           | K.VVLAEVIQAFSAPENAVR.M           | 1            | C10_HUMAN            |
| Q99622                                                             | 3             | 5.3013           | K.M#LQFVLPVATQIQQEVK.A           | 3            | C10_HUMAN            |
| Q99622                                                             | 2             | 4.115            | K.SYEAQDPEIASLSGK.L              | 1            | C10_HUMAN            |
| Q99622                                                             | 3             | 5.233            | K.MLQFVLPVATQIQQEVK.A            | 5            | C10_HUMAN            |
| <b><i>Protein C20orf11 - Homo sapiens (Human)</i></b>              |               |                  |                                  |              |                      |
| Q9NWU2                                                             | 3             | 4.799            | R.TLALLAFDSPEESPFGLLHTM#QR.Q     | 1            | CT011_HUMAN          |
| <b><i>Protein capicua homolog - Homo sapiens (Human)</i></b>       |               |                  |                                  |              |                      |
| Q96RK0                                                             | 3             | 6.4874           | R.VPGQGLENRGEPTPPSPAPAPAVAPGGSSE | 1            | CIC_HUMAN            |
| Q96RK0                                                             | 3             | 5.1067           | K.AQESGQGSTAGPLRPPPPGAGGPATPSK.A | 2            | CIC_HUMAN            |
| Q96RK0                                                             | 2             | 3.1396           | R.AEASPNDTAGAR.T                 | 3            | CIC_HUMAN            |
| <b><i>Protein cappuccino homolog - Homo sapiens (Human)</i></b>    |               |                  |                                  |              |                      |
| Q9NUP1                                                             | 3             | 3.9048           | K.SAPSRPQQAGYEAPVLFRT            | 1            | CNO_HUMAN            |

| <i>Accession No*</i>                                        | <i>Charge</i> | <i>XC(Max)**</i> | <i>Peptide*</i>                | <i>TC***</i> | <i>Reference No*</i> |
|-------------------------------------------------------------|---------------|------------------|--------------------------------|--------------|----------------------|
| <b><i>Protein CASC3 - Homo sapiens (Human)</i></b>          |               |                  |                                |              |                      |
| O15234                                                      | 3             | 4.8456           | R.AGFRPVEAGGQHGGGR.S           | 2            | CASC3_HUMAN          |
| O15234                                                      | 2             | 3.6755           | R.QSGDGQESTEPVENK.V            | 4            | CASC3_HUMAN          |
| O15234                                                      | 3             | 4.1139           | R.SGETVKHEISYR.S               | 1            | CASC3_HUMAN          |
| O15234                                                      | 2             | 3.1377           | R.GQTQEEEVPRK.G                | 2            | CASC3_HUMAN          |
| O15234                                                      | 2             | 3.1333           | K.SEANDAVNSSTK.E               | 1            | CASC3_HUMAN          |
| <b><i>Protein CASC5 - Homo sapiens (Human)</i></b>          |               |                  |                                |              |                      |
| Q8NG31                                                      | 2             | 2.9252           | K.EDENNSNITRLFREK.D            | 1            | CASC5_HUMAN          |
| <b><i>Protein CDV3 homolog - Homo sapiens (Human)</i></b>   |               |                  |                                |              |                      |
| Q9UKY7                                                      | 1             | 2.1089           | K.SFEVVR.H                     | 1            | Q9UKY7_HUMAN         |
| Q9UKY7                                                      | 2             | 4.7444           | K.LQLDNQYAVLENQK.S             | 3            | Q9UKY7_HUMAN         |
| <b><i>Protein cereblon - Homo sapiens (Human)</i></b>       |               |                  |                                |              |                      |
| Q96SW2                                                      | 1             | 2.2394           | K.KDMSPQK.F                    | 1            | CRBN_HUMAN           |
| <b><i>Protein cordon-bleu - Homo sapiens (Human)</i></b>    |               |                  |                                |              |                      |
| O75128                                                      | 2             | 3.8523           | K.DGNLM#ETAPR.V                | 4            | COBL_HUMAN           |
| O75128                                                      | 2             | 3.7517           | R.NNNAGSFDSEGVASR.R            | 2            | COBL_HUMAN           |
| O75128                                                      | 2             | 4.065            | K.QSTSSQEASSASEPR.R            | 2            | COBL_HUMAN           |
| O75128                                                      | 2             | 4.3024           | R.GPPSTPVPTQTQNPESR.L          | 2            | COBL_HUMAN           |
| O75128                                                      | 2             | 3.1939           | K.DGNLMETAPR.V                 | 2            | COBL_HUMAN           |
| O75128                                                      | 2             | 3.0368           | R.IISLSSVPEAESQPIGK.V          | 1            | COBL_HUMAN           |
| <b><i>Protein CutA precursor - Homo sapiens (Human)</i></b> |               |                  |                                |              |                      |
| O60888                                                      | 2             | 2.9388           | K.GKIEEDSEVLM#MIK.T            | 1            | CUTA_HUMAN           |
| O60888                                                      | 2             | 5.1237           | K.GKIEEDSEVLMMIK.T             | 5            | CUTA_HUMAN           |
| O60888                                                      | 2             | 4.0279           | K.TQSSLVPALTDVFR.S             | 9            | CUTA_HUMAN           |
| <b><i>Protein CWC15 homolog - Homo sapiens (Human)</i></b>  |               |                  |                                |              |                      |
| Q9P013                                                      | 3             | 6.4796           | R.MENILSGNPLLNLTGPSQPQANFK.V   | 3            | CWC15_HUMAN          |
| Q9P013                                                      | 3             | 6.6458           | R.IRMENILSGNPLLNLTGPSQPQANFK.V | 2            | CWC15_HUMAN          |
| <b><i>Protein Daple - Homo sapiens (Human)</i></b>          |               |                  |                                |              |                      |
| Q9P219                                                      | 2             | 2.8396           | K.EEKIVLLEAQM#EEK.A            | 1            | DAPLE_HUMAN          |
| Q9P219                                                      | 2             | 2.9659           | R.LTEAEAPPSVAPR.Q              | 2            | DAPLE_HUMAN          |
| <b><i>Protein DBF4 homolog - Homo sapiens (Human)</i></b>   |               |                  |                                |              |                      |
| Q9UBU7                                                      | 2             | 2.8735           | K.EQNFLYKETQETEK.K             | 1            | DBF4_HUMAN           |



Accession No\* Charge XC(Max)\*\* Peptide\* TC\*\*\* Reference No\*

**Protein DEK - Homo sapiens (Human)**

|        |   |        |                    |   |           |
|--------|---|--------|--------------------|---|-----------|
| P35659 | 2 | 3.2694 | K.NVGQFSGFPFEK.G   | 2 | DEK_HUMAN |
| P35659 | 2 | 3.8904 | K.LLASANLEEVMTK.Q  | 2 | DEK_HUMAN |
| P35659 | 2 | 3.9561 | K.LLASANLEEVMT#K.Q | 2 | DEK_HUMAN |
| P35659 | 3 | 3.8112 | K.KPPTDEELKETIK.K  | 1 | DEK_HUMAN |

**Protein deltex-3 - Homo sapiens (Human)**

|        |   |        |                       |   |            |
|--------|---|--------|-----------------------|---|------------|
| Q8N919 | 2 | 2.8989 | K.CRHSFCEGCITRALQVK.K | 1 | DTX3_HUMAN |
|--------|---|--------|-----------------------|---|------------|

**Protein DGCR14 - Homo sapiens (Human)**

|        |   |        |                       |   |             |
|--------|---|--------|-----------------------|---|-------------|
| Q96DF8 | 2 | 3.0892 | K.REAGEAGAATSK.Q      | 2 | DGC14_HUMAN |
| Q96DF8 | 2 | 3.1092 | R.YTSEDNASFQEIMEVAK.E | 1 | DGC14_HUMAN |

**Protein disulfide-isomerase A3 precursor - Homo sapiens (Human)**

|        |   |        |                               |    |             |
|--------|---|--------|-------------------------------|----|-------------|
| P30101 | 2 | 4.3195 | K.IFRDGEEAGAYDGPR.T           | 7  | PDIA3_HUMAN |
| P30101 | 1 | 3.314  | K.FVMQEEFSR.D                 | 4  | PDIA3_HUMAN |
| P30101 | 2 | 3.9483 | R.FLQDYFDGNLKR.Y              | 5  | PDIA3_HUMAN |
| P30101 | 2 | 4.683  | K.M#DATANDVPSPYEVR.G          | 2  | PDIA3_HUMAN |
| P30101 | 2 | 3.3515 | K.LNFAVASR.K                  | 3  | PDIA3_HUMAN |
| P30101 | 2 | 5.3696 | K.MDATANDVPSPYEVR.G           | 7  | PDIA3_HUMAN |
| P30101 | 2 | 3.0361 | R.GFPTIYFSPANK.K              | 5  | PDIA3_HUMAN |
| P30101 | 2 | 4.0376 | R.DGEEAGAYDGPR.T              | 13 | PDIA3_HUMAN |
| P30101 | 3 | 4.76   | K.LSKDPNIVIAK.M               | 6  | PDIA3_HUMAN |
| P30101 | 2 | 3.176  | K.FVM#QEEFSR.D                | 2  | PDIA3_HUMAN |
| P30101 | 1 | 2.166  | K.TVAYTEQK.M                  | 2  | PDIA3_HUMAN |
| P30101 | 2 | 3.5207 | R.EATNPPVIQEEKPK.K            | 5  | PDIA3_HUMAN |
| P30101 | 2 | 5.3034 | K.TFSHELSDFGLESTAGEIPVVAIR.T  | 1  | PDIA3_HUMAN |
| P30101 | 2 | 3.5908 | K.YGVSGYPTLK.I                | 4  | PDIA3_HUMAN |
| P30101 | 2 | 3.5669 | R.TADGIVSHLK.K                | 3  | PDIA3_HUMAN |
| P30101 | 2 | 3.3937 | R.LAPEYAAAATR.L               | 5  | PDIA3_HUMAN |
| P30101 | 2 | 2.9877 | K.SEPIPESNDGPVK.V             | 4  | PDIA3_HUMAN |
| P30101 | 2 | 4.5661 | K.RLAPEYAAAATR.L              | 7  | PDIA3_HUMAN |
| P30101 | 2 | 3.7018 | R.ELSDFISYLQR.E               | 9  | PDIA3_HUMAN |
| P30101 | 2 | 3.8033 | R.GFPTIYFSPANKK.L             | 4  | PDIA3_HUMAN |
| P30101 | 3 | 4.5145 | R.KTFSHELSDFGLESTAGEIPVVAIR.T | 5  | PDIA3_HUMAN |
| P30101 | 2 | 3.2358 | R.TADGIVSHLKK.Q               | 2  | PDIA3_HUMAN |
| P30101 | 2 | 4.4091 | K.FEDKTVAYTEQK.M              | 1  | PDIA3_HUMAN |

Accession No\* Charge XC(Max)\*\* Peptide\* TC\*\*\* Reference No\*

***Protein disulfide-isomerase A4 precursor - Homo sapiens (Human)***

|        |   |        |                             |   |             |
|--------|---|--------|-----------------------------|---|-------------|
| P13667 | 2 | 3.6548 | K.KGQAVDYEGSR.T             | 3 | PDIA4_HUMAN |
| P13667 | 3 | 5.001  | R.SHMM#DVQGSTQDSAIDKDFVLK.Y | 2 | PDIA4_HUMAN |
| P13667 | 2 | 4.0236 | K.VDATAETDLAK.R             | 8 | PDIA4_HUMAN |
| P13667 | 2 | 3.142  | K.FAMEPEEFDSOTLR.E          | 4 | PDIA4_HUMAN |
| P13667 | 2 | 3.4093 | K.GRPYDYNGPR.E              | 2 | PDIA4_HUMAN |
| P13667 | 2 | 3.8116 | K.YGIVDYMIEQSGPPSK.E        | 2 | PDIA4_HUMAN |
| P13667 | 3 | 4.4329 | R.SHMMDVQGSTQDSAIDKDFVLK.Y  | 2 | PDIA4_HUMAN |
| P13667 | 1 | 3.0153 | R.TQEEIVAK.V                | 2 | PDIA4_HUMAN |
| P13667 | 2 | 5.1507 | K.IDATSASVLSR.F             | 4 | PDIA4_HUMAN |
| P13667 | 2 | 3.24   | K.YGIVDYM#IEQSGPPSK.E       | 1 | PDIA4_HUMAN |
| P13667 | 2 | 3.368  | K.M#DATANDVPSDR.Y           | 2 | PDIA4_HUMAN |
| P13667 | 2 | 2.9667 | K.FAM#EPEEFDSOTLR.E         | 1 | PDIA4_HUMAN |
| P13667 | 3 | 4.0245 | K.KGQAVDYEGSRTQEEIVAK.V     | 1 | PDIA4_HUMAN |
| P13667 | 2 | 3.5182 | K.VEGFPTIYFAPSGDK.K         | 2 | PDIA4_HUMAN |
| P13667 | 2 | 3.004  | K.VSQGQLVVMQPEK.F           | 2 | PDIA4_HUMAN |
| P13667 | 2 | 3.6091 | K.VDATAETDLAKR.F            | 1 | PDIA4_HUMAN |

***Protein disulfide-isomerase A6 precursor - Homo sapiens (Human)***

|        |   |        |                             |   |             |
|--------|---|--------|-----------------------------|---|-------------|
| Q15084 | 2 | 3.2469 | K.NRPEDYQGGR.T              | 4 | PDIA6_HUMAN |
| Q15084 | 2 | 4.2423 | R.GSTAPVGGGAFPTIVER.E       | 1 | PDIA6_HUMAN |
| Q15084 | 2 | 4.3383 | R.TGEAIVDAALSALR.Q          | 5 | PDIA6_HUMAN |
| Q15084 | 3 | 4.8353 | R.ALDLFSNAPPELLEIINEDIAKR.T | 1 | PDIA6_HUMAN |
| Q15084 | 2 | 5.2235 | K.LAAVDATVNQVLSR.Y          | 2 | PDIA6_HUMAN |
| Q15084 | 3 | 4.885  | K.IFQKGESPVYDGGGR.T         | 3 | PDIA6_HUMAN |
| Q15084 | 2 | 4.6499 | K.GSFSEQGINEFLR.E           | 3 | PDIA6_HUMAN |
| Q15084 | 2 | 3.6458 | K.AATALKDVVK.V              | 2 | PDIA6_HUMAN |
| Q15084 | 2 | 2.9404 | K.NLEPEWAAAASEVK.E          | 2 | PDIA6_HUMAN |
| Q15084 | 2 | 3.0825 | R.TRSDIVSR.A                | 2 | PDIA6_HUMAN |

***Protein disulfide-isomerase precursor - Homo sapiens (Human)***

|        |   |        |                     |   |             |
|--------|---|--------|---------------------|---|-------------|
| P07237 | 2 | 4.0113 | K.YKPESEELTAER.I    | 2 | PDIA1_HUMAN |
| P07237 | 1 | 2.2704 | K.TAAESFK.G         | 2 | PDIA1_HUMAN |
| P07237 | 2 | 4.5173 | K.ILFIFIDSDHTDNQR.I | 2 | PDIA1_HUMAN |
| P07237 | 1 | 3.1386 | R.EADDIVNWLK.K      | 6 | PDIA1_HUMAN |
| P07237 | 2 | 3.3009 | R.ILEFFGLKK.E       | 2 | PDIA1_HUMAN |
| P07237 | 3 | 4.6291 | R.KSNFAEALAAHK.Y    | 5 | PDIA1_HUMAN |

| <i>Accession No*</i> | <i>Charge</i> | <i>XC(Max)**</i> | <i>Peptide*</i>                 | <i>TC***</i> | <i>Reference No*</i> |
|----------------------|---------------|------------------|---------------------------------|--------------|----------------------|
| P07237               | 2             | 3.03             | R.ILEFFGLK.K                    | 3            | PDIA1_HUMAN          |
| P07237               | 2             | 5.0322           | K.YQLDKDGVVLFKK.F               | 3            | PDIA1_HUMAN          |
| P07237               | 2             | 4.3966           | K.YQLDKDGVVLFK.K                | 7            | PDIA1_HUMAN          |
| P07237               | 1             | 2.3581           | K.VHSFPTLK.F                    | 3            | PDIA1_HUMAN          |
| P07237               | 2             | 5.2766           | K.VDATEESDLAQQYGVR.G            | 35           | PDIA1_HUMAN          |
| P07237               | 2             | 5.2415           | R.NNFEGEVTKENLLDFIK.H           | 3            | PDIA1_HUMAN          |
| P07237               | 3             | 3.7967           | R.LAKVDATEESDLAQQYGVR.G         | 1            | PDIA1_HUMAN          |
| P07237               | 1             | 2.8444           | K.SVSDYDGGK.L                   | 5            | PDIA1_HUMAN          |
| P07237               | 2             | 3.9361           | R.LITLEEEMTK.Y                  | 3            | PDIA1_HUMAN          |
| P07237               | 2             | 4.1616           | K.MDSTANEVEAVK.V                | 6            | PDIA1_HUMAN          |
| P07237               | 3             | 5.631            | K.FDEGRNNFEGEVTKENLLDFIK.H      | 4            | PDIA1_HUMAN          |
| P07237               | 3             | 3.7187           | R.TGPAATLTPDGAASLSESEVAVIGFFK.D | 1            | PDIA1_HUMAN          |
| P07237               | 2             | 5.0464           | K.HNQLPLVIEFTEQTAPK.I           | 4            | PDIA1_HUMAN          |
| P07237               | 2             | 4.0068           | K.SNFAEALAAHK.Y                 | 4            | PDIA1_HUMAN          |
| P07237               | 2             | 4.1988           | K.SVSDYDGGKLSNFK.T              | 2            | PDIA1_HUMAN          |
| P07237               | 2             | 3.9218           | K.NFEDVAFDEKK.N                 | 6            | PDIA1_HUMAN          |
| P07237               | 3             | 3.7211           | K.M#DSTANEVEAVKVHSFPTLK.F       | 1            | PDIA1_HUMAN          |
| P07237               | 2             | 3.9496           | K.M#DSTANEVEAVK.V               | 4            | PDIA1_HUMAN          |
| P07237               | 1             | 2.4437           | K.LKAEGSEIR.L                   | 1            | PDIA1_HUMAN          |
| P07237               | 3             | 4.5762           | K.LGETYKDHENIVIAK.M             | 8            | PDIA1_HUMAN          |
| P07237               | 3             | 4.8268           | K.IKPHLMSQELPEDWDKQPVK.V        | 2            | PDIA1_HUMAN          |
| P07237               | 3             | 6.8783           | K.FLESGGQDGAGDDDDLEEEAEEPDMEEED | 1            | PDIA1_HUMAN          |
| P07237               | 3             | 4.8679           | K.FLESGGQDGAGDDDDLEEEAEEPDM#EED | 1            | PDIA1_HUMAN          |
| P07237               | 2             | 3.0924           | R.LITLEEEM#TK.Y                 | 2            | PDIA1_HUMAN          |
| P07237               | 3             | 5.3401           | K.QFLQAAEAIDDPFGITSNSDVFVK.Y    | 4            | PDIA1_HUMAN          |

***Protein DJ-1 - Homo sapiens (Human)***

|        |   |        |                                 |   |             |
|--------|---|--------|---------------------------------|---|-------------|
| Q99497 | 3 | 3.8002 | K.KEGPYDVVVLPGGNLGAQNLSESAAVK.E | 1 | PARK7_HUMAN |
| Q99497 | 3 | 4.7621 | K.EGPYDVVVLPGGNLGAQNLSESAAVK.E  | 4 | PARK7_HUMAN |
| Q99497 | 2 | 3.2855 | K.EILKEQENRK.G                  | 4 | PARK7_HUMAN |
| Q99497 | 1 | 2.6722 | K.EVAAQVK.A                     | 6 | PARK7_HUMAN |
| Q99497 | 2 | 3.6566 | K.DGLILTSR.G                    | 6 | PARK7_HUMAN |
| Q99497 | 2 | 3.8978 | K.GAEEM#ETVIPVDVM#R.R           | 5 | PARK7_HUMAN |
| Q99497 | 2 | 4.5143 | K.GAEEM#ETVIPVDVMR.R            | 4 | PARK7_HUMAN |
| Q99497 | 1 | 2.144  | R.ALVILAK.G                     | 1 | PARK7_HUMAN |
| Q99497 | 2 | 6.1436 | R.GPGTSFEFALAIVEALNGK.E         | 6 | PARK7_HUMAN |
| Q99497 | 2 | 3.8048 | K.GAEEMETVIPVDVMR.R             | 1 | PARK7_HUMAN |

| <i>Accession No*</i>                                                               | <i>Charge</i> | <i>XC(Max)**</i> | <i>Peptide*</i>                | <i>TC***</i> | <i>Reference No*</i> |
|------------------------------------------------------------------------------------|---------------|------------------|--------------------------------|--------------|----------------------|
| Q99497                                                                             | 1             | 2.3349           | K.APLVLKD.-                    | 3            | PARK7_HUMAN          |
| Q99497                                                                             | 2             | 3.0408           | R.VEKDGLILTSR.G                | 2            | PARK7_HUMAN          |
| Q99497                                                                             | 2             | 3.5423           | K.GAEEMETVIPVDVM#R.R           | 1            | PARK7_HUMAN          |
| Q99497                                                                             | 3             | 5.2765           | R.GPGTSFEFALAIVEALNGKEVAAQVK.A | 7            | PARK7_HUMAN          |
| <b><i>Protein Dos - Homo sapiens (Human)</i></b>                                   |               |                  |                                |              |                      |
| Q8N350                                                                             | 2             | 3.4918           | R.LEAAEAAGGASPDSPPER.G         | 1            | DOS_HUMAN            |
| <b><i>Protein EMI5 homolog, mitochondrial precursor - Homo sapiens (Human)</i></b> |               |                  |                                |              |                      |
| Q9NX18                                                                             | 2             | 3.7261           | K.PAPEIFENEVMALLR.D            | 1            | EMI5_HUMAN           |
| Q9NX18                                                                             | 2             | 2.8711           | R.TDESIETKR.A                  | 1            | EMI5_HUMAN           |
| <b><i>Protein enabled homolog - Homo sapiens (Human)</i></b>                       |               |                  |                                |              |                      |
| Q8N8S7                                                                             | 2             | 3.2769           | R.RQLQEQQR.Q                   | 2            | ENAH_HUMAN           |
| <b><i>Protein ENL - Homo sapiens (Human)</i></b>                                   |               |                  |                                |              |                      |
| Q03111                                                                             | 3             | 4.4785           | K.RPATADSPKPSAK.K              | 1            | ENL_HUMAN            |
| <b><i>Protein FAM103A1 - Homo sapiens (Human)</i></b>                              |               |                  |                                |              |                      |
| Q9BTL3                                                                             | 2             | 3.8782           | R.FTENDKEYQEYLK.R              | 4            | F103A_HUMAN          |
| Q9BTL3                                                                             | 2             | 4.2932           | K.RPPESPPIVEEWSNR.A            | 2            | F103A_HUMAN          |
| <b><i>Protein FAM110C - Homo sapiens (Human)</i></b>                               |               |                  |                                |              |                      |
| Q1W6H9                                                                             | 2             | 3.3957           | R.SAAPSSVPAAPPGPEPR.V          | 2            | F110C_HUMAN          |
| <b><i>Protein FAM114A2 - Homo sapiens (Human)</i></b>                              |               |                  |                                |              |                      |
| Q9NRY5                                                                             | 1             | 2.2183           | K.SEPVVSTR.K                   | 1            | F1142_HUMAN          |
| Q9NRY5                                                                             | 2             | 4.3328           | K.NSESVDQGAKPESK.S             | 7            | F1142_HUMAN          |
| Q9NRY5                                                                             | 3             | 3.9278           | K.SILSSASATVATVGQGISNVIEK.A    | 1            | F1142_HUMAN          |
| <b><i>Protein FAM126B - Homo sapiens (Human)</i></b>                               |               |                  |                                |              |                      |
| Q8IXS8                                                                             | 2             | 2.7768           | K.DKETASAIK.S                  | 1            | F126B_HUMAN          |
| <b><i>Protein FAM134A - Homo sapiens (Human)</i></b>                               |               |                  |                                |              |                      |
| Q8NC44                                                                             | 3             | 3.7114           | R.DLGEEGEEGELAPPEDLLGRPQALSR.Q | 1            | F134A_HUMAN          |
| Q8NC44                                                                             | 2             | 3.8876           | R.QALDSEEEEEEDVAAK.E           | 2            | F134A_HUMAN          |
| <b><i>Protein FAM136A - Homo sapiens (Human)</i></b>                               |               |                  |                                |              |                      |
| Q96C01                                                                             | 2             | 3.6279           | R.VQEAVESM#VK.S                | 1            | F136A_HUMAN          |
| Q96C01                                                                             | 2             | 3.2589           | R.VQEAVESMVK.S                 | 1            | F136A_HUMAN          |
| <b><i>Protein FAM21C - Homo sapiens (Human)</i></b>                                |               |                  |                                |              |                      |
| Q9Y4E1                                                                             | 2             | 3.9053           | K.GLFSDEEDSEDLFSSQSASNLK.G     | 4            | FA21C_HUMAN          |

| <i>Accession No*</i>                                      | <i>Charge</i> | <i>XC(Max)**</i> | <i>Peptide*</i>                   | <i>TC***</i> | <i>Reference No*</i> |
|-----------------------------------------------------------|---------------|------------------|-----------------------------------|--------------|----------------------|
| Q9Y4E1                                                    | 2             | 3.8655           | K.TSLFEEDKEDDLFAIAK.D             | 1            | FA21C_HUMAN          |
| <b><i>Protein FAM32A - Homo sapiens (Human)</i></b>       |               |                  |                                   |              |                      |
| Q9Y421                                                    | 2             | 2.7027           | R.TPAQAAFEK.M                     | 1            | FA32A_HUMAN          |
| <b><i>Protein FAM43A - Homo sapiens (Human)</i></b>       |               |                  |                                   |              |                      |
| Q8N2R8                                                    | 2             | 2.8309           | R.QADGASADEPHSG.-                 | 1            | FA43A_HUMAN          |
| <b><i>Protein FAM44A - Homo sapiens (Human)</i></b>       |               |                  |                                   |              |                      |
| Q8NFC6                                                    | 2             | 4.1301           | K.STADSGGEGLETAPK.S               | 3            | FA44A_HUMAN          |
| Q8NFC6                                                    | 2             | 3.3403           | R.TSEDMADKEK.S                    | 2            | FA44A_HUMAN          |
| Q8NFC6                                                    | 2             | 3.6717           | K.DVQQESSEQK.N                    | 4            | FA44A_HUMAN          |
| <b><i>Protein FAM83B - Homo sapiens (Human)</i></b>       |               |                  |                                   |              |                      |
| Q5T0W9                                                    | 2             | 2.9136           | R.FNTEIQIYR.D                     | 1            | FA83B_HUMAN          |
| <b><i>Protein FAM83H - Homo sapiens (Human)</i></b>       |               |                  |                                   |              |                      |
| Q6ZRV2                                                    | 2             | 3.1879           | R.APAGDLLPSAFR.V                  | 2            | Q6ZRV2_HUMAN         |
| <b><i>Protein fucU homolog - Homo sapiens (Human)</i></b> |               |                  |                                   |              |                      |
| A2VDF0                                                    | 2             | 4.2791           | R.ADGLGIPQLLEAVLK.L               | 6            | CJ125_HUMAN          |
| <b><i>Protein ITFG3 - Homo sapiens (Human)</i></b>        |               |                  |                                   |              |                      |
| Q9H0X4                                                    | 2             | 3.4656           | R.LGEGGPDSQAIR.D                  | 1            | ITFG3_HUMAN          |
| <b><i>Protein KIAA0284 - Homo sapiens (Human)</i></b>     |               |                  |                                   |              |                      |
| Q9Y4F5                                                    | 2             | 4.7463           | R.LGDASDTEAADGER.G                | 5            | K0284_HUMAN          |
| Q9Y4F5                                                    | 2             | 2.8257           | R.ESSPAARPSPEK.V                  | 1            | K0284_HUMAN          |
| Q9Y4F5                                                    | 2             | 4.1837           | R.GSLGNPEPVGPRAAEQAK.K            | 2            | K0284_HUMAN          |
| Q9Y4F5                                                    | 3             | 3.7211           | R.LFGQEELDPDSLSDASGSDGGRGPEPGVEPQ | 1            | K0284_HUMAN          |
| Q9Y4F5                                                    | 2             | 3.792            | R.AGSFTGTSDPEAAPAR.T              | 2            | K0284_HUMAN          |
| Q9Y4F5                                                    | 2             | 3.321            | R.RPGTEAASYR.T                    | 1            | K0284_HUMAN          |
| <b><i>Protein KIAA0913 - Homo sapiens (Human)</i></b>     |               |                  |                                   |              |                      |
| O94987                                                    | 3             | 8.709            | K.HGGPSAPGALQPLTSGSAGPAQPGSVAGAGP | 3            | O94987_HUMAN         |
| <b><i>Protein KIAA1107 - Homo sapiens (Human)</i></b>     |               |                  |                                   |              |                      |
| Q9UPP5                                                    | 2             | 5.9332           | R.SEDYDAGGSQDDDGSNDR.G            | 3            | Q9UPP5_HUMAN         |
| <b><i>Protein KIAA1191 - Homo sapiens (Human)</i></b>     |               |                  |                                   |              |                      |
| Q6IA24                                                    | 2             | 2.763            | R.QPASAQSTPSTTPHSSPK.Q            | 1            | Q6IA24_HUMAN         |
| Q6IA24                                                    | 1             | 2.2972           | K.GLTTEETK.Y                      | 1            | Q6IA24_HUMAN         |
| Q6IA24                                                    | 2             | 3.2146           | K.LQSGEVTKEER.Q                   | 2            | Q6IA24_HUMAN         |

*Accession No\* Charge XC(Max)\*\* Peptide\* TC\*\*\* Reference No\**

***Protein KIAA1522 - Homo sapiens (Human)***

|        |   |        |                            |   |              |
|--------|---|--------|----------------------------|---|--------------|
| Q9P206 | 2 | 4.2079 | R.VSLQALEAEAEAGAETEAMLQR.H | 1 | Q9P206_HUMAN |
| Q9P206 | 2 | 3.4541 | R.VYRDDTFVGR.S             | 2 | Q9P206_HUMAN |
| Q9P206 | 2 | 4.1178 | R.SGPQILTPLGDR.F           | 3 | Q9P206_HUMAN |
| Q9P206 | 3 | 3.8759 | R.KPSVGVPPPASPSPYR.A       | 1 | Q9P206_HUMAN |
| Q9P206 | 2 | 3.3981 | R.SISEQRPPQAPK.K           | 2 | Q9P206_HUMAN |
| Q9P206 | 2 | 2.801  | R.KLQLER.P                 | 1 | Q9P206_HUMAN |

***Protein KIAA1967 - Homo sapiens (Human)***

|        |   |       |                     |   |             |
|--------|---|-------|---------------------|---|-------------|
| Q8N163 | 2 | 4.063 | K.AAYNPGQAVPWNAVK.V | 4 | K1967_HUMAN |
|--------|---|-------|---------------------|---|-------------|

***Protein kinase C and casein kinase substrate in neurons protein 2 - Homo sapiens (Human)***

|        |   |        |                          |   |             |
|--------|---|--------|--------------------------|---|-------------|
| Q9UNF0 | 2 | 3.1609 | R.LDNGQVGLYPANYVEAIQ.-   | 1 | PACN2_HUMAN |
| Q9UNF0 | 2 | 4.8016 | K.GRLDNGQVGLYPANYVEAIQ.- | 3 | PACN2_HUMAN |
| Q9UNF0 | 2 | 4.137  | R.ALYDYEGQEHDLSFK.A      | 4 | PACN2_HUMAN |
| Q9UNF0 | 1 | 2.3048 | K.NVSSYEK.T              | 8 | PACN2_HUMAN |

***Protein kinase C and casein kinase substrate in neurons protein 3 - Homo sapiens (Human)***

|        |   |        |                    |   |             |
|--------|---|--------|--------------------|---|-------------|
| Q9UKS6 | 2 | 3.4642 | R.SPDEVTLTSIVPTR.D | 1 | PACN3_HUMAN |
|--------|---|--------|--------------------|---|-------------|

***Protein kinase NYD-SP15 - Homo sapiens (Human)***

|        |   |        |            |   |              |
|--------|---|--------|------------|---|--------------|
| Q9BWV3 | 1 | 2.1118 | R.ENGVLR.P | 1 | Q9BWV3_HUMAN |
|--------|---|--------|------------|---|--------------|

***Protein KPL2 - Homo sapiens (Human)***

|        |   |        |                               |   |            |
|--------|---|--------|-------------------------------|---|------------|
| Q9C093 | 3 | 4.1774 | K.GKSPPM#AEATPVIVTTEEIAEIKR.K | 1 | KPL2_HUMAN |
|--------|---|--------|-------------------------------|---|------------|

***Protein LAP2 - Homo sapiens (Human)***

|        |   |        |                                 |   |            |
|--------|---|--------|---------------------------------|---|------------|
| Q96RT1 | 3 | 5.4462 | K.M#AEMRPPLIETSINQPK.V          | 2 | LAP2_HUMAN |
| Q96RT1 | 2 | 4.0002 | R.LKDEETNEDSGR.D                | 3 | LAP2_HUMAN |
| Q96RT1 | 2 | 3.2972 | R.SEESTENQSYAK.H                | 2 | LAP2_HUMAN |
| Q96RT1 | 3 | 5.8791 | K.MAEMRPPLIETSINQPK.V           | 4 | LAP2_HUMAN |
| Q96RT1 | 2 | 5.6261 | K.ISEPEAEISPGSLPVTANMK.A        | 1 | LAP2_HUMAN |
| Q96RT1 | 2 | 3.594  | K.ISEPEAEISPGSLPVTANM#K.A       | 3 | LAP2_HUMAN |
| Q96RT1 | 2 | 4.4273 | K.LITNDTFQPEIM#ER.S             | 3 | LAP2_HUMAN |
| Q96RT1 | 4 | 4.8829 | K.IRQEDENFNSSLQNGDILNSSTEEKFK.A | 1 | LAP2_HUMAN |
| Q96RT1 | 2 | 4.2407 | K.IYDILSDNGPQQPSTTVK.I          | 3 | LAP2_HUMAN |

***Protein LAP4 - Homo sapiens (Human)***

|        |   |        |               |   |            |
|--------|---|--------|---------------|---|------------|
| Q14160 | 2 | 2.8031 | R.VSEEGPAAR.A | 1 | LAP4_HUMAN |
| Q14160 | 2 | 2.7461 | K.SLEQDALR.A  | 1 | LAP4_HUMAN |

| <i>Accession No*</i>                                       | <i>Charge</i> | <i>XC(Max)**</i> | <i>Peptide*</i>             | <i>TC***</i> | <i>Reference No*</i> |
|------------------------------------------------------------|---------------|------------------|-----------------------------|--------------|----------------------|
| Q14160                                                     | 2             | 3.3805           | R.VPQAEGPPKR.V              | 2            | LAP4_HUMAN           |
| Q14160                                                     | 2             | 2.7725           | R.VSLVGADDLR.K              | 1            | LAP4_HUMAN           |
| Q14160                                                     | 2             | 2.8858           | R.QSPASPPPLGGGAPVR.T        | 1            | LAP4_HUMAN           |
| Q14160                                                     | 2             | 2.8746           | R.AGDAGIFVSR.I              | 1            | LAP4_HUMAN           |
| <b><i>Protein LTVI homolog. - Homo sapiens (Human)</i></b> |               |                  |                             |              |                      |
| Q96GA3                                                     | 2             | 3.9483           | R.DPLAADESAPQR.V            | 3            | Q96GA3_HUMAN         |
| <b><i>Protein lunapark - Homo sapiens (Human)</i></b>      |               |                  |                             |              |                      |
| Q9C0E8                                                     | 2             | 2.9208           | K.DSSAPGGPPER.T             | 2            | LNP_HUMAN            |
| <b><i>Protein LYRIC - Homo sapiens (Human)</i></b>         |               |                  |                             |              |                      |
| Q86UE4                                                     | 2             | 3.6953           | K.TISTSDPAEVLVK.N           | 3            | LYRIC_HUMAN          |
| Q86UE4                                                     | 3             | 3.8635           | K.NKGDSHLNVQVSNFK.S         | 2            | LYRIC_HUMAN          |
| Q86UE4                                                     | 3             | 5.6677           | K.LSSQISAGEEKWNSVSPASAGKR.K | 2            | LYRIC_HUMAN          |
| Q86UE4                                                     | 2             | 3.147            | K.SDSKSSSQVPPILQETDK.S      | 1            | LYRIC_HUMAN          |
| Q86UE4                                                     | 2             | 3.2328           | K.TLPPATSTEPSVILSK.S        | 2            | LYRIC_HUMAN          |
| Q86UE4                                                     | 3             | 3.7431           | K.SDSKSSSQVPPILQETDKSK.S    | 1            | LYRIC_HUMAN          |
| Q86UE4                                                     | 2             | 3.7062           | K.QGEDNSTAQDTEELEK.E        | 2            | LYRIC_HUMAN          |
| Q86UE4                                                     | 3             | 4.8245           | K.LSSQISAGEEKWNSVSPASAGK.R  | 3            | LYRIC_HUMAN          |
| Q86UE4                                                     | 2             | 3.2953           | K.LSSQISAGEEK.W             | 3            | LYRIC_HUMAN          |
| Q86UE4                                                     | 2             | 4.7878           | R.TVEVAEGEAVR.T             | 2            | LYRIC_HUMAN          |
| Q86UE4                                                     | 3             | 5.0489           | R.HDGKEVDEGAWETK.I          | 3            | LYRIC_HUMAN          |
| Q86UE4                                                     | 2             | 2.9835           | K.WNSVSPASAGKR.K            | 1            | LYRIC_HUMAN          |
| Q86UE4                                                     | 2             | 4.208            | K.EIREDLPVNTSK.T            | 1            | LYRIC_HUMAN          |
| Q86UE4                                                     | 2             | 3.45             | K.SSSQVPPILQETDKSK.S        | 2            | LYRIC_HUMAN          |
| Q86UE4                                                     | 2             | 2.8965           | K.SSSQVPPILQETDK.S          | 1            | LYRIC_HUMAN          |
| Q86UE4                                                     | 1             | 2.2417           | K.SETSWESPK.Q               | 2            | LYRIC_HUMAN          |
| Q86UE4                                                     | 2             | 3.1501           | K.WNSVSPASAGK.R             | 2            | LYRIC_HUMAN          |
| <b><i>Protein LZIC - Homo sapiens (Human)</i></b>          |               |                  |                             |              |                      |
| Q8WZA0                                                     | 3             | 3.8463           | R.LAEM#DRDLMVGKLER.D        | 1            | LZIC_HUMAN           |
| Q8WZA0                                                     | 2             | 3.3357           | R.LAEMDRDLM#VGK.L           | 1            | LZIC_HUMAN           |
| Q8WZA0                                                     | 1             | 2.241            | R.DLYTQQK.V                 | 1            | LZIC_HUMAN           |
| Q8WZA0                                                     | 3             | 3.9533           | K.VSTDLGSGDKILALASFEVEK.T   | 2            | LZIC_HUMAN           |
| Q8WZA0                                                     | 2             | 2.9365           | K.VEILTALR.K                | 3            | LZIC_HUMAN           |
| Q8WZA0                                                     | 3             | 4.287            | R.LAEMDRDLM#VGKLER.D        | 4            | LZIC_HUMAN           |
| Q8WZA0                                                     | 2             | 3.5221           | R.LAEMDRDLMVGK.L            | 1            | LZIC_HUMAN           |
| Q8WZA0                                                     | 3             | 4.4404           | R.LAEMDRDLMVGKLER.D         | 6            | LZIC_HUMAN           |

| <i>Accession No*</i>                                                              | <i>Charge</i> | <i>XC(Max)**</i> | <i>Peptide*</i>            | <i>TC***</i> | <i>Reference No*</i> |
|-----------------------------------------------------------------------------------|---------------|------------------|----------------------------|--------------|----------------------|
| Q8WZA0                                                                            | 2             | 4.0498           | K.ILALASFEVEK.T            | 3            | LZIC_HUMAN           |
| Q8WZA0                                                                            | 3             | 5.4372           | K.LTADDEAFLSANAGAILSQFEK.V | 21           | LZIC_HUMAN           |
| Q8WZA0                                                                            | 2             | 2.8958           | K.VEILTALRK.L              | 2            | LZIC_HUMAN           |
| Q8WZA0                                                                            | 1             | 2.7492           | K.VSTDLGSGDK.I             | 2            | LZIC_HUMAN           |
| <b><i>Protein NDRG1 - Homo sapiens (Human)</i></b>                                |               |                  |                            |              |                      |
| Q92597                                                                            | 2             | 3.4077           | K.SIIGMTGAGAYILTR.F        | 1            | NDRG1_HUMAN          |
| <b><i>Protein NEDD1 - Homo sapiens (Human)</i></b>                                |               |                  |                            |              |                      |
| Q8NHV4                                                                            | 2             | 4.4939           | R.SVNVNAASGGVQNSGIVR.E     | 2            | NEDD1_HUMAN          |
| <b><i>Protein numb homolog - Homo sapiens (Human)</i></b>                         |               |                  |                            |              |                      |
| P49757                                                                            | 2             | 2.9332           | R.TNPSPTNPFSSDLQK.T        | 1            | NUMB_HUMAN           |
| P49757                                                                            | 3             | 5.146            | K.PAHTALAPVAMPVR.E         | 1            | NUMB_HUMAN           |
| P49757                                                                            | 3             | 4.7763           | R.RHAPIEQLAR.Q             | 2            | NUMB_HUMAN           |
| <b><i>Protein phosphatase 1 regulatory subunit 11 - Homo sapiens (Human)</i></b>  |               |                  |                            |              |                      |
| O60927                                                                            | 3             | 5.38             | K.KVEWTSDDTVDNEHMGR.R      | 1            | PP1RB_HUMAN          |
| <b><i>Protein phosphatase 1 regulatory subunit 12A - Homo sapiens (Human)</i></b> |               |                  |                            |              |                      |
| O14974                                                                            | 2             | 2.7421           | K.ETQTDSISR.Y              | 1            | MYPT1_HUMAN          |
| O14974                                                                            | 2             | 3.8652           | R.SYLTPVRDEESESQR.K        | 2            | MYPT1_HUMAN          |
| O14974                                                                            | 2             | 2.8503           | R.TYDETYQR.Y               | 1            | MYPT1_HUMAN          |
| O14974                                                                            | 3             | 4.5404           | R.RLASTSDIEEKENR.D         | 6            | MYPT1_HUMAN          |
| O14974                                                                            | 2             | 3.464            | R.SGSYSYLEER.K             | 1            | MYPT1_HUMAN          |
| O14974                                                                            | 2             | 2.9946           | R.RISEMEEELK.M             | 5            | MYPT1_HUMAN          |
| O14974                                                                            | 2             | 3.4639           | R.LSSSLDNKEK.E             | 5            | MYPT1_HUMAN          |
| O14974                                                                            | 2             | 3.7577           | R.LEKDDSTDFKK.L            | 4            | MYPT1_HUMAN          |
| O14974                                                                            | 2             | 2.9944           | R.YETSSTSAGDR.Y            | 1            | MYPT1_HUMAN          |
| O14974                                                                            | 2             | 2.8651           | K.ETLIEPEK.N               | 1            | MYPT1_HUMAN          |
| O14974                                                                            | 2             | 3.106            | K.DDSTDFKK.L               | 4            | MYPT1_HUMAN          |
| O14974                                                                            | 2             | 3.2235           | R.KDESPATWR.L              | 3            | MYPT1_HUMAN          |
| O14974                                                                            | 2             | 3.5263           | R.LAYVAPTIPR.R             | 2            | MYPT1_HUMAN          |
| O14974                                                                            | 2             | 4.8526           | R.STQGVTLTDLQEAEK.T        | 3            | MYPT1_HUMAN          |
| O14974                                                                            | 3             | 4.9285           | R.RSTQGVTLTDLQEAEK.T       | 2            | MYPT1_HUMAN          |
| O14974                                                                            | 2             | 4.1777           | K.AQLHDTNMELTDLK.L         | 6            | MYPT1_HUMAN          |
| O14974                                                                            | 2             | 3.798            | R.LASTSDIEEKENR.D          | 2            | MYPT1_HUMAN          |
| O14974                                                                            | 2             | 5.569            | K.ITTGSSSAGTQSSTSNR.L      | 1            | MYPT1_HUMAN          |
| O14974                                                                            | 2             | 4.1104           | K.VGQTAFDVADEDILGYLEELQK.K | 2            | MYPT1_HUMAN          |



| <i>Accession No*</i> | <i>Charge</i> | <i>XC(Max)**</i> | <i>Peptide*</i>        | <i>TC***</i> | <i>Reference No*</i> |
|----------------------|---------------|------------------|------------------------|--------------|----------------------|
| O14974               | 2             | 3.9667           | K.LYEQILAENEK.L        | 3            | MYPT1_HUMAN          |
| O14974               | 2             | 5.0366           | K.LYEQILAENEK.LK.A     | 5            | MYPT1_HUMAN          |
| O14974               | 2             | 3.9023           | K.NKETLIIIEPEK.N       | 3            | MYPT1_HUMAN          |
| O14974               | 2             | 4.0923           | K.SGGTALHVAAAK.G       | 2            | MYPT1_HUMAN          |
| O14974               | 2             | 2.8141           | K.SLLSSTSTTTK.I        | 1            | MYPT1_HUMAN          |
| O14974               | 2             | 3.7183           | K.TGSYGALAEITASK.E     | 1            | MYPT1_HUMAN          |
| O14974               | 2             | 3.2089           | K.SPLIESTANM#DNNQSQK.T | 1            | MYPT1_HUMAN          |

***Protein phosphatase 1 regulatory subunit 12B - Homo sapiens (Human)***

|        |   |        |                    |   |             |
|--------|---|--------|--------------------|---|-------------|
| O60237 | 2 | 4.4574 | K.LYESALTENQK.L    | 3 | MYPT2_HUMAN |
| O60237 | 2 | 3.8685 | K.LQEAQLELADIK.S   | 1 | MYPT2_HUMAN |
| O60237 | 2 | 5.9861 | K.TKLQEAQLELADIK.S | 7 | MYPT2_HUMAN |

***Protein phosphatase 1 regulatory subunit 12C - Homo sapiens (Human)***

|        |   |        |                                      |   |              |
|--------|---|--------|--------------------------------------|---|--------------|
| Q9BZL4 | 2 | 4.0341 | R.AADPGPGAELDPAAPPPAR.A              | 2 | Q9BZL4_HUMAN |
| Q9BZL4 | 2 | 4.3723 | K.APESEKPAQSLDPSR.R                  | 5 | Q9BZL4_HUMAN |
| Q9BZL4 | 2 | 3.5525 | R.LLLQAGYDPELR.D                     | 2 | Q9BZL4_HUMAN |
| Q9BZL4 | 3 | 4.2667 | R.IPEPESPAKPNVPTASTAPPADSR.D         | 2 | Q9BZL4_HUMAN |
| Q9BZL4 | 2 | 2.922  | R.GQEPQAPSSSK.H                      | 1 | Q9BZL4_HUMAN |
| Q9BZL4 | 3 | 5.1999 | R.GPAEGEEAEPADRSQESSTLEGGPSAR.R      | 2 | Q9BZL4_HUMAN |
| Q9BZL4 | 2 | 2.9478 | R.RGVDVEAAK.R                        | 1 | Q9BZL4_HUMAN |
| Q9BZL4 | 3 | 5.1251 | R.RPGGAGGPPIQDEDEGEEGPTPEPPPAEPR.T   | 2 | Q9BZL4_HUMAN |
| Q9BZL4 | 2 | 4.1364 | K.SPQVLEEAPFSR.R                     | 3 | Q9BZL4_HUMAN |
| Q9BZL4 | 3 | 4.0613 | K.ERRRPGGAGGPPIQDEDEGEEGPTPEPPPAEPR. | 1 | Q9BZL4_HUMAN |
| Q9BZL4 | 2 | 3.9576 | R.GPAEGEEAEPADR.S                    | 4 | Q9BZL4_HUMAN |
| Q9BZL4 | 2 | 4.171  | R.TGASALHVAAAK.G                     | 2 | Q9BZL4_HUMAN |
| Q9BZL4 | 2 | 4.2867 | R.SASSSWLEGTSTQAK.E                  | 4 | Q9BZL4_HUMAN |
| Q9BZL4 | 2 | 3.4574 | R.TAEGAPGAGLQR.S                     | 3 | Q9BZL4_HUMAN |
| Q9BZL4 | 2 | 3.9388 | R.VPGVENSDDSPAQR.A                   | 4 | Q9BZL4_HUMAN |
| Q9BZL4 | 2 | 4.4669 | R.AEAPDGQGGPGQAAR.E                  | 6 | Q9BZL4_HUMAN |

***Protein phosphatase 1 regulatory subunit 14A - Homo sapiens (Human)***

|        |   |        |                              |   |             |
|--------|---|--------|------------------------------|---|-------------|
| Q96A00 | 2 | 4.1773 | R.GMEADMPDEINIDELLELESEEER.S | 2 | PP14A_HUMAN |
| Q96A00 | 2 | 3.2209 | R.ARGPGGSPGGLQK.R            | 2 | PP14A_HUMAN |
| Q96A00 | 2 | 3.8631 | K.PVEDFIQELLAK.L             | 2 | PP14A_HUMAN |

***Protein phosphatase 1 regulatory subunit 14B - Homo sapiens (Human)***

|        |   |        |                              |   |             |
|--------|---|--------|------------------------------|---|-------------|
| Q96C90 | 3 | 4.3429 | R.VYFQSPPGAAGEGPGGADDEGPVR.R | 1 | PP14B_HUMAN |
|--------|---|--------|------------------------------|---|-------------|

Accession No\* Charge XC(Max)\*\* Peptide\* TC\*\*\* Reference No\*

***Protein phosphatase 1 regulatory subunit 14D - Homo sapiens (Human)***

Q9NXH3 3 5.7137 R.PTEAFISELLSQLKK.L 2 PP14D\_HUMAN

***Protein phosphatase 1 regulatory subunit 7 - Homo sapiens (Human)***

Q15435 2 3.6432 R.GAGQQQSQEM#M#EVDR.R 2 PP1R7\_HUMAN

Q15435 2 4.237 R.GAGQQQSQEMMEVDR.R 2 PP1R7\_HUMAN

Q15435 2 3.5853 R.GAGQQQSQEMM#EVDR.R 1 PP1R7\_HUMAN

***Protein phosphatase 1G - Homo sapiens (Human)***

O15355 2 3.9156 R.LPLPYGFSAMQGW.R.V 2 PPM1G\_HUMAN

O15355 2 5.0155 K.SGGGTGEEPGSQGLNGEAGPEDSTR.E 2 PPM1G\_HUMAN

***Protein phosphatase 1H - Homo sapiens (Human)***

Q9ULR3 3 6.1874 R.LLQHHITEQLQDIVDILK.N 2 PPM1H\_HUMAN

***Protein preY, mitochondrial precursor - Homo sapiens (Human)***

Q96I23 3 5.5587 K.KPLRYEASTNELINEELGIAYPIIDGIPNMIPQAA 1 PREY\_HUMAN

***Protein PRR15 - Homo sapiens (Human)***

Q8IV56 3 3.7497 R.ENQHPNLLGGAGEPPKPKDK.L 1 PRR15\_HUMAN

Q8IV56 3 4.717 K.SKEAAVGVPPPAQAPAGEPTPPAPPSPDWTS 1 PRR15\_HUMAN

Q8IV56 2 3.023 R.SPEEAGFPDPHEDKQ.- 2 PRR15\_HUMAN

***Protein quaking - Homo sapiens (Human)***

Q96PU8 2 3.5366 R.TPTPAGPTIMPLIR.Q 2 QKI\_HUMAN

***Protein Red - Homo sapiens (Human)***

Q13123 2 3.1827 K.AAFQYGIK.M 1 RED\_HUMAN

Q13123 2 3.012 K.LRQQEIER.E 2 RED\_HUMAN

Q13123 2 4.415 R.AVGPTAEADKSAAEK.R 2 RED\_HUMAN

***Protein S100-A11 - Homo sapiens (Human)***

P31949 2 3.614 K.DGYNYTLSK.T 9 S10AB\_HUMAN

P31949 1 2.1422 K.ISSPTETER.C 1 S10AB\_HUMAN

***Protein S100-A13 - Homo sapiens (Human)***

Q99584 1 3.1259 K.DVGSLEDEK.M 10 S10AD\_HUMAN

Q99584 2 2.8189 K.DSLSVNEFK.E 1 S10AD\_HUMAN

Q99584 1 2.3734 R.LIGELAK.E 1 S10AD\_HUMAN

Q99584 2 4.5289 K.ELVTQQLPHLLK.D 4 S10AD\_HUMAN

Q99584 2 3.6129 K.SLDVNQDSELK.F 4 S10AD\_HUMAN

Accession No\* Charge XC(Max)\*\* Peptide\* TC\*\*\* Reference No\*

---

***Protein S100-A4 - Homo sapiens (Human)***

P26447 2 3.3783 K.RTDEAAFQK.L 3 S10A4\_HUMAN

***Protein S100-A6 - Homo sapiens (Human)***

P06703 1 2.4008 K.LQDAEIAR.L 5 S10A6\_HUMAN

P06703 2 3.0983 R.LMEDLDRNK.D 2 S10A6\_HUMAN

P06703 1 2.1903 K.ELTIGSK.L 3 S10A6\_HUMAN

***Protein S100-A7 - Homo sapiens (Human)***

P31151 3 5.9426 K.KIDFSEFLSLLGDIATDYHK.Q 1 S10A7\_HUMAN

P31151 2 2.7557 K.GTNYLADVFEK.K 1 S10A7\_HUMAN

***Protein S100-A8 - Homo sapiens (Human)***

P05109 2 3.8808 K.ALNSIIDVYHK.Y 2 S10A8\_HUMAN

***Protein S100-A9 - Homo sapiens (Human)***

P06702 2 3.1183 R.KDLQNFLK.K 7 S10A9\_HUMAN

P06702 3 4.6851 K.VIEHIMEDLDTNADK.Q 3 S10A9\_HUMAN

P06702 3 3.9525 K.LGHPDTLNQGEFK.E 9 S10A9\_HUMAN

P06702 2 2.8605 K.DLQNFLK.K 2 S10A9\_HUMAN

***Protein SET - Homo sapiens (Human)***

Q01105 3 5.8298 K.KPRPPPALGPEETSASAGLPK.K 2 SET\_HUMAN

***Protein Shroom2 - Homo sapiens (Human)***

Q13796 2 3.8185 K.TVEDLKSEELAR.E 2 SHRM2\_HUMAN

Q13796 2 2.8698 R.QAQAAGDPQGSEEK.L 1 SHRM2\_HUMAN

Q13796 2 4.1893 R.TTSLGDSLNAHSAAEK.A 1 SHRM2\_HUMAN

Q13796 2 2.741 R.VM#DNNTTVK.M 1 SHRM2\_HUMAN

Q13796 2 3.5307 R.YSEESTPADLGPR.A 2 SHRM2\_HUMAN

***Protein Shroom3 - Homo sapiens (Human)***

Q8TF72 2 4.4099 R.VENVLSGLGEDASNEER.S 2 SHRM3\_HUMAN

***Protein Shroom4 - Homo sapiens (Human)***

Q9ULL8 2 4.6998 R.ASSVDSNPLNEASAELAK.A 5 SHRM4\_HUMAN

Q9ULL8 3 4.4714 K.APSGRPNVAETSGGSR.R 2 SHRM4\_HUMAN

Q9ULL8 2 3.5534 K.AASGTEAGEEGDSEPK.E 2 SHRM4\_HUMAN

***Protein SLC7A6OS - Homo sapiens (Human)***

Q96CW6 2 3.3445 R.SDAVESAAQK.T 2 S7A6O\_HUMAN

| <i>Accession No*</i>                                                  | <i>Charge</i> | <i>XC(Max)**</i> | <i>Peptide*</i>            | <i>TC***</i> | <i>Reference No*</i> |
|-----------------------------------------------------------------------|---------------|------------------|----------------------------|--------------|----------------------|
| <b><i>Protein SMG5 - Homo sapiens (Human)</i></b>                     |               |                  |                            |              |                      |
| Q9UPR3                                                                | 3             | 4.7358           | K.VGDDSDLSEGFESDSSHDSAR.A  | 2            | SMG5_HUMAN           |
| <b><i>Protein TMED8 - Homo sapiens (Human)</i></b>                    |               |                  |                            |              |                      |
| Q6PL24                                                                | 2             | 4.2548           | K.QDLLPADQAQVLNEMAK.Y      | 1            | TMED8_HUMAN          |
| Q6PL24                                                                | 2             | 2.7716           | K.DATEDLRK.A               | 1            | TMED8_HUMAN          |
| <b><i>Protein transport protein Sec31A - Homo sapiens (Human)</i></b> |               |                  |                            |              |                      |
| O94979                                                                | 2             | 3.2209           | K.TTFEDLIQR.C              | 1            | SC31A_HUMAN          |
| O94979                                                                | 2             | 2.9163           | R.EQTLSPITISGLHNIAR.S      | 1            | SC31A_HUMAN          |
| <b><i>Protein TSSC4 - Homo sapiens (Human)</i></b>                    |               |                  |                            |              |                      |
| Q9Y5U2                                                                | 2             | 3.1867           | R.GM#SSTFSQR.S             | 1            | TSSC4_HUMAN          |
| Q9Y5U2                                                                | 2             | 3.2399           | R.VPPVPDYVAHPER.W          | 2            | TSSC4_HUMAN          |
| Q9Y5U2                                                                | 2             | 3.1163           | R.GMSSTFSQR.S              | 1            | TSSC4_HUMAN          |
| <b><i>Protein wibg homolog - Homo sapiens (Human)</i></b>             |               |                  |                            |              |                      |
| Q9BRP8                                                                | 2             | 5.3942           | R.IQAGEVSQPSKEQLEK.L       | 2            | WIBG_HUMAN           |
| Q9BRP8                                                                | 2             | 4.2617           | R.AAPTAASDQPDSAATTEK.A     | 6            | WIBG_HUMAN           |
| Q9BRP8                                                                | 3             | 4.0445           | K.LRQVEELQQR.I             | 3            | WIBG_HUMAN           |
| Q9BRP8                                                                | 3             | 4.9143           | R.VKEGYVPQEEVPVYENK.Y      | 6            | WIBG_HUMAN           |
| Q9BRP8                                                                | 2             | 3.4934           | K.EGYVPQEEVPVYENK.Y        | 3            | WIBG_HUMAN           |
| Q9BRP8                                                                | 2             | 3.4044           | R.RALEEELEDLELGL.-         | 1            | WIBG_HUMAN           |
| Q9BRP8                                                                | 2             | 3.0446           | K.YIASTQRPDGTWR.K          | 2            | WIBG_HUMAN           |
| Q9BRP8                                                                | 3             | 4.9444           | R.TLDKVSLEETAQLPSAPQGSR.A  | 4            | WIBG_HUMAN           |
| Q9BRP8                                                                | 2             | 3.279            | R.IQAGEVSQPSK.E            | 2            | WIBG_HUMAN           |
| <b><i>Protein Wiz - Homo sapiens (Human)</i></b>                      |               |                  |                            |              |                      |
| O95785                                                                | 3             | 5.6876           | R.QLGVAESESSGAPIDLLYELVK.Q | 1            | WIZ_HUMAN            |
| <b><i>Prothrombin precursor - Homo sapiens (Human)</i></b>            |               |                  |                            |              |                      |
| P00734                                                                | 2             | 2.7788           | R.TATSEYQTFNPR.T           | 1            | THRB_HUMAN           |
| P00734                                                                | 2             | 3.8886           | R.DKLAACLEGNCAEGLGTNYR.G   | 2            | THRB_HUMAN           |
| P00734                                                                | 2             | 2.8396           | K.LAACLEGNCAEGLGTNYR.G     | 1            | THRB_HUMAN           |
| <b><i>Prothymosin a14 - Homo sapiens (Human)</i></b>                  |               |                  |                            |              |                      |
| Q9UMZ1                                                                | 2             | 3.5387           | R.AAEDDEDNDVDTK.K          | 5            | Q9UMZ1_HUMAN         |
| <b><i>Protocadherin gamma A2 precursor - Homo sapiens (Human)</i></b> |               |                  |                            |              |                      |
| Q9Y5H1                                                                | 1             | 2.1606           | R.GRSQLFALNPR.S            | 1            | PCDG2_HUMAN          |

| <i>Accession No*</i>                                                             | <i>Charge</i> | <i>XC(Max)**</i> | <i>Peptide*</i>                 | <i>TC***</i> | <i>Reference No*</i> |
|----------------------------------------------------------------------------------|---------------|------------------|---------------------------------|--------------|----------------------|
| <b><i>Protocadherin gamma A6 precursor - Homo sapiens (Human)</i></b>            |               |                  |                                 |              |                      |
| Q9Y5G7                                                                           | 2             | 3.0242           | K.EELEVKILENAAPSSR.F            | 1            | PCDG6_HUMAN          |
| <b><i>Protocadherin LKC precursor - Homo sapiens (Human)</i></b>                 |               |                  |                                 |              |                      |
| Q9BYE9                                                                           | 2             | 3.3959           | R.ANPMLNLPNK.D                  | 2            | PCDLK_HUMAN          |
| Q9BYE9                                                                           | 2             | 3.4086           | K.TFVIPELVLPNR.E                | 1            | PCDLK_HUMAN          |
| Q9BYE9                                                                           | 2             | 3.6999           | R.EFYSASVAEDAAK.G               | 2            | PCDLK_HUMAN          |
| Q9BYE9                                                                           | 2             | 5.3102           | R.GLVLGAGWAEGYLR.L              | 1            | PCDLK_HUMAN          |
| Q9BYE9                                                                           | 2             | 3.4153           | R.QAINAALTQATR.T                | 2            | PCDLK_HUMAN          |
| Q9BYE9                                                                           | 2             | 3.7959           | K.AWDADQTEANNR.I                | 2            | PCDLK_HUMAN          |
| Q9BYE9                                                                           | 2             | 3.2128           | K.TAAGVMPSAPAIPGTNMYNTER.A      | 1            | PCDLK_HUMAN          |
| <b><i>Proto-oncogene C-crk - Homo sapiens (Human)</i></b>                        |               |                  |                                 |              |                      |
| P46108                                                                           | 2             | 2.7931           | K.RVPNAYDK.T                    | 2            | CRK_HUMAN            |
| P46108                                                                           | 2             | 3.5499           | K.TALALEVGELVK.V                | 1            | CRK_HUMAN            |
| <b><i>Proto-oncogene tyrosine-protein kinase ABL1 - Homo sapiens (Human)</i></b> |               |                  |                                 |              |                      |
| P00519                                                                           | 3             | 5.6469           | K.AGGKPSQSPSQEAAGEAVLGAK.T      | 5            | ABL1_HUMAN           |
| <b><i>Proto-oncogene tyrosine-protein kinase Src - Homo sapiens (Human)</i></b>  |               |                  |                                 |              |                      |
| P12931                                                                           | 2             | 2.8602           | R.GPSAAFAPAAAEPK.L              | 1            | SRC_HUMAN            |
| <b><i>Pseudouridylate synthase 7 homolog - Homo sapiens (Human)</i></b>          |               |                  |                                 |              |                      |
| Q96PZ0                                                                           | 3             | 4.2745           | K.GQDGLQNDFLSISEDVPRPPDVTSTGK.G | 1            | PUS7_HUMAN           |
| <b><i>Pterin-4-alpha-carbinolamine dehydratase - Homo sapiens (Human)</i></b>    |               |                  |                                 |              |                      |
| P61457                                                                           | 3             | 5.1986           | K.LDHHPEWFNVYNK.V               | 3            | PHS_HUMAN            |
| P61457                                                                           | 3             | 5.0118           | R.VALQAEKLDHHPEWFNVYNK.V        | 2            | PHS_HUMAN            |
| P61457                                                                           | 2             | 4.1337           | R.LSAEERDQLLPNLR.A              | 6            | PHS_HUMAN            |
| P61457                                                                           | 2             | 3.6854           | R.AVGWNELEGR.D                  | 3            | PHS_HUMAN            |
| <b><i>PTPN18 protein - Homo sapiens (Human)</i></b>                              |               |                  |                                 |              |                      |
| Q7Z637                                                                           | 2             | 5.7398           | R.GAPAGAGSGTQTGTGTGAR.S         | 4            | Q7Z637_HUMAN         |
| <b><i>Pumilio homolog 2 - Homo sapiens (Human)</i></b>                           |               |                  |                                 |              |                      |
| Q8TB72                                                                           | 2             | 2.7381           | R.DAETDGPEK.G                   | 1            | PUM2_HUMAN           |
| Q8TB72                                                                           | 2             | 3.7272           | R.DAETDGPEKGDQK.G               | 2            | PUM2_HUMAN           |
| <b><i>Putative adenosylhomocysteinase 2 - Homo sapiens (Human)</i></b>           |               |                  |                                 |              |                      |
| O43865                                                                           | 2             | 4.1818           | K.KQIQFADDMQEFTK.F              | 2            | SAHH2_HUMAN          |
| O43865                                                                           | 3             | 4.7089           | K.KQIQFADDMQEFTKFPTK.T          | 1            | SAHH2_HUMAN          |

Accession No\* Charge XC(Max)\*\* Peptide\* TC\*\*\* Reference No\*

***Putative adenosylhomocysteinase 3 - Homo sapiens (Human)***

|        |   |        |                          |   |             |
|--------|---|--------|--------------------------|---|-------------|
| Q96HN2 | 2 | 3.3311 | R.DGGEALVSPDGTVTEAPR.T   | 1 | SAHH3_HUMAN |
| Q96HN2 | 3 | 5.2617 | R.HRDGGEALVSPDGTVTEAPR.T | 1 | SAHH3_HUMAN |

***Putative ATP-dependent RNA helicase DHX29 - Homo sapiens (Human)***

|        |   |        |                     |   |             |
|--------|---|--------|---------------------|---|-------------|
| Q7Z478 | 2 | 3.9757 | K.SLEEEEFDPNER.Y    | 3 | DHX29_HUMAN |
| Q7Z478 | 2 | 3.7458 | K.SAEAGIAGEAQSK.K   | 1 | DHX29_HUMAN |
| Q7Z478 | 2 | 3.3556 | K.TYEEDPKSKPK.K     | 1 | DHX29_HUMAN |
| Q7Z478 | 2 | 2.8704 | R.YAEQQNEEEKNENSK.S | 1 | DHX29_HUMAN |
| Q7Z478 | 2 | 3.8112 | R.PATAAAAAAGSR.E    | 2 | DHX29_HUMAN |

***Putative eukaryotic translation initiation factor 3 subunit - Homo sapiens (Human)***

|        |   |        |                                 |   |            |
|--------|---|--------|---------------------------------|---|------------|
| O75153 | 2 | 3.3312 | K.SEDPPGQEAGSEEEGSSASGLAK.V     | 2 | IF3X_HUMAN |
| O75153 | 2 | 3.391  | R.SVEGLQEGSVLR.V                | 2 | IF3X_HUMAN |
| O75153 | 3 | 4.1456 | R.DRAEEMATEPAPAGAPGDLGSQPPAAK.D | 1 | IF3X_HUMAN |

***Putative GTP-binding protein Parf - Homo sapiens (Human)***

|        |   |        |                        |   |            |
|--------|---|--------|------------------------|---|------------|
| Q3YEC7 | 2 | 4.9727 | R.TAADELEAFLGGGAPGGR.H | 4 | PARF_HUMAN |
|--------|---|--------|------------------------|---|------------|

***Putative MAPK activating protein - Homo sapiens (Human)***

|        |   |        |                            |   |              |
|--------|---|--------|----------------------------|---|--------------|
| Q7Z422 | 2 | 3.9116 | R.ISQPEDSRQPNNVIR.Q        | 3 | Q7Z422_HUMAN |
| Q7Z422 | 2 | 2.7946 | R.ISQPEDSR.Q               | 1 | Q7Z422_HUMAN |
| Q7Z422 | 2 | 3.1445 | K.VPIVIQDDSLPAGPPPQIR.I    | 1 | Q7Z422_HUMAN |
| Q7Z422 | 3 | 5.5392 | K.SPPKVPVIQDDSLPAGPPPQIR.I | 1 | Q7Z422_HUMAN |

***Putative pre-mRNA-splicing factor ATP-dependent RNA helicase DHX15 - Homo sapiens (Human)***

|        |   |        |                   |   |             |
|--------|---|--------|-------------------|---|-------------|
| O43143 | 3 | 4.7335 | R.HRLDLGEDYPSGK.K | 3 | DHX15_HUMAN |
| O43143 | 2 | 3.0776 | R.LDLGEDYPSGK.K   | 2 | DHX15_HUMAN |

***Putative RNA methyltransferase NOL1 - Homo sapiens (Human)***

|        |   |        |                      |   |            |
|--------|---|--------|----------------------|---|------------|
| P46087 | 2 | 5.0607 | K.TQASSSFQDSSQPAGK.A | 5 | NOL1_HUMAN |
|--------|---|--------|----------------------|---|------------|

***Putative RNA-binding protein 15 - Homo sapiens (Human)***

|        |   |        |                         |   |             |
|--------|---|--------|-------------------------|---|-------------|
| Q96T37 | 2 | 3.2459 | R.RLPEESGGR.H           | 5 | RBM15_HUMAN |
| Q96T37 | 2 | 3.4043 | R.SDGSAPSTSTASSK.L      | 3 | RBM15_HUMAN |
| Q96T37 | 2 | 3.6834 | R.SSGAASSAPGGGDGAIEYK.T | 1 | RBM15_HUMAN |

***Putative RNA-binding protein 3 - Homo sapiens (Human)***

|        |   |        |                   |   |            |
|--------|---|--------|-------------------|---|------------|
| P98179 | 2 | 3.2156 | R.AM#NGESLDGR.Q   | 4 | RBM3_HUMAN |
| P98179 | 2 | 3.9    | R.YSGGNRYRDNYDN.- | 2 | RBM3_HUMAN |
| P98179 | 2 | 3.9795 | R.PGGYGYGYGR.S    | 1 | RBM3_HUMAN |

| <i>Accession No*</i>                                                                   | <i>Charge</i> | <i>XC(Max)**</i> | <i>Peptide*</i>                     | <i>TC***</i> | <i>Reference No*</i> |
|----------------------------------------------------------------------------------------|---------------|------------------|-------------------------------------|--------------|----------------------|
| P98179                                                                                 | 3             | 3.944            | R.GFGFITFTNPEHASVAMR.A              | 4            | RBM3_HUMAN           |
| P98179                                                                                 | 2             | 3.185            | R.AMNGESLDGR.Q                      | 3            | RBM3_HUMAN           |
| P98179                                                                                 | 3             | 5.2174           | K.LFVGGLNFNTDEQALEDHFSSFGPISEVVVK.  | 2            | RBM3_HUMAN           |
| P98179                                                                                 | 2             | 3.737            | R.GFGFITFTNPEHASVAM#R.A             | 3            | RBM3_HUMAN           |
| <b><i>Putative rRNA methyltransferase 3 - Homo sapiens (Human)</i></b>                 |               |                  |                                     |              |                      |
| Q8IY81                                                                                 | 2             | 6.385            | R.ILDPEGLALGAVIASSK.K               | 4            | RRMJ3_HUMAN          |
| Q8IY81                                                                                 | 2             | 3.1411           | K.SDDDGFEIVPIEDPAK.H                | 1            | RRMJ3_HUMAN          |
| Q8IY81                                                                                 | 2             | 2.7123           | R.DLIDNSFNR.Y                       | 1            | RRMJ3_HUMAN          |
| <b><i>Putative splicing factor, arginine/serine-rich 14 - Homo sapiens (Human)</i></b> |               |                  |                                     |              |                      |
| Q8IX01                                                                                 | 2             | 4.1521           | R.DYDVDHPGEADSVLR.G                 | 2            | SFR14_HUMAN          |
| Q8IX01                                                                                 | 3             | 6.0558           | R.FVAQVGPEIEQFSIENSTDNDPDLWFLHDQNSS | 1            | SFR14_HUMAN          |
| Q8IX01                                                                                 | 2             | 3.0256           | R.RITQETFDVAVLQEK.A                 | 1            | SFR14_HUMAN          |
| Q8IX01                                                                                 | 2             | 4.2926           | R.ALNIVDQEGSLLGK.G                  | 2            | SFR14_HUMAN          |
| <b><i>Putative thiosulfate sulfurtransferase KAT - Homo sapiens (Human)</i></b>        |               |                  |                                     |              |                      |
| Q8NFU3                                                                                 | 1             | 3.2697           | R.GLQATQLAR.S                       | 7            | KAT_HUMAN            |
| Q8NFU3                                                                                 | 1             | 2.5421           | R.NYAGAYR.E                         | 7            | KAT_HUMAN            |
| Q8NFU3                                                                                 | 2             | 4.513            | R.NYAGAYREWLEK.E                    | 5            | KAT_HUMAN            |
| Q8NFU3                                                                                 | 2             | 3.7169           | R.NYAGAYREWLEKES.-                  | 5            | KAT_HUMAN            |
| Q8NFU3                                                                                 | 1             | 2.4683           | R.SLGYTGAR.N                        | 2            | KAT_HUMAN            |
| Q8NFU3                                                                                 | 1             | 2.798            | R.SLLASGR.A                         | 7            | KAT_HUMAN            |
| Q8NFU3                                                                                 | 2             | 3.0862           | K.RGLQATQLAR.S                      | 5            | KAT_HUMAN            |
| Q8NFU3                                                                                 | 1             | 2.3494           | R.EWLEKES.-                         | 2            | KAT_HUMAN            |
| <b><i>Putative tyrosine-protein phosphatase auxilin - Homo sapiens (Human)</i></b>     |               |                  |                                     |              |                      |
| O75061                                                                                 | 2             | 2.8151           | R.SATSTSASPTLR.V                    | 2            | AUXI_HUMAN           |
| <b><i>Putative uncharacterized protein - Homo sapiens (Human)</i></b>                  |               |                  |                                     |              |                      |
| Q05DH4                                                                                 | 3             | 3.7864           | K.DSEDMKDSQEAAAR.P                  | 1            | Q05DH4_HUMAN         |
| A5PL36                                                                                 | 2             | 4.6959           | R.GEVGAGAGPGAQAGPSAK.R              | 2            | A5PL36_HUMAN         |
| A0JLQ0                                                                                 | 2             | 4.9532           | R.YSLTYIYTGLSK.H                    | 7            | A0JLQ0_HUMAN         |
| A5PL36                                                                                 | 2             | 2.7259           | K.KVPM#LTWPSLLKK.P                  | 1            | A5PL36_HUMAN         |
| Q9BT86                                                                                 | 1             | 2.3826           | R.DPGGGGCALR.E                      | 1            | Q9BT86_HUMAN         |
| Q96F87                                                                                 | 2             | 3.798            | R.SFQPLPGYGISQSSR.L                 | 3            | Q96F87_HUMAN         |
| Q9Y520                                                                                 | 2             | 2.7488           | R.PAVLSGYFK.Q                       | 2            | Q9Y520_HUMAN         |
| Q9HBR0                                                                                 | 3             | 6.6441           | R.DLGLAADLPGGAEGAAAQPQAVLR.Q        | 2            | Q9HBR0_HUMAN         |
| Q9Y520                                                                                 | 4             | 5.7396           | K.ATEEPEDVRSEAALDQEIQITAAYSVEHNQLEA | 2            | Q9Y520_HUMAN         |

| <i>Accession No*</i> | <i>Charge</i> | <i>XC(Max)**</i> | <i>Peptide*</i>   | <i>TC***</i> | <i>Reference No*</i> |
|----------------------|---------------|------------------|-------------------|--------------|----------------------|
| Q9Y520               | 2             | 2.8092           | R.DHAISLSEPR.M    | 1            | Q9Y520_HUMAN         |
| Q05DR4               | 2             | 4.2046           | R.SLAALSQIAYQR.N  | 4            | Q05DR4_HUMAN         |
| Q05DE8               | 2             | 3.5384           | K.AASLGSSQSSR.T   | 7            | Q05DE8_HUMAN         |
| Q05DR4               | 2             | 4.7207           | R.RSLAALSQIAYQR.N | 2            | Q05DR4_HUMAN         |
| Q05DE8               | 2             | 3.3078           | K.KAASLGSSQSSR.T  | 3            | Q05DE8_HUMAN         |
| Q05DE8               | 2             | 3.0754           | K.SSSMNPTEK.A     | 2            | Q05DE8_HUMAN         |
| Q05DE8               | 2             | 3.1069           | K.TSESPSKPGEK.K   | 10           | Q05DE8_HUMAN         |

***Putative uncharacterized protein CAPG - Homo sapiens (Human)***

|        |   |        |                           |   |              |
|--------|---|--------|---------------------------|---|--------------|
| Q53SA7 | 3 | 3.7237 | R.MQYAPNTQVEILPQGHEPIFK.Q | 1 | Q53SA7_HUMAN |
|--------|---|--------|---------------------------|---|--------------|

***Putative uncharacterized protein DKFZp434H018 - Homo sapiens (Human)***

|        |   |        |                    |   |              |
|--------|---|--------|--------------------|---|--------------|
| Q9UFM0 | 2 | 4.6187 | R.DPPSLSSASPPGSR.E | 4 | Q9UFM0_HUMAN |
|--------|---|--------|--------------------|---|--------------|

***Putative uncharacterized protein DKFZp434M1616 - Homo sapiens (Human)***

|        |   |        |                        |   |              |
|--------|---|--------|------------------------|---|--------------|
| Q9NSM8 | 2 | 2.7007 | R.FFSEQQSK.Q           | 1 | Q9NSM8_HUMAN |
| Q9NSM8 | 3 | 3.7601 | K.VEEKPPPAPSIATKPV.R.T | 1 | Q9NSM8_HUMAN |

***Putative uncharacterized protein DKFZp451J0218 - Homo sapiens (Human)***

|        |   |        |                     |   |              |
|--------|---|--------|---------------------|---|--------------|
| Q86T83 | 2 | 3.0231 | K.LEEELDLLVLDLHQR.Q | 1 | Q86T83_HUMAN |
|--------|---|--------|---------------------|---|--------------|

***Putative uncharacterized protein DKFZp564G0422 - Homo sapiens (Human)***

|        |   |        |                 |   |              |
|--------|---|--------|-----------------|---|--------------|
| Q5JXL8 | 1 | 2.4292 | R.EQLAALK.K     | 8 | Q5JXL8_HUMAN |
| Q5JXL8 | 1 | 2.3399 | R.EQLAALKK.H    | 4 | Q5JXL8_HUMAN |
| Q5JXL8 | 2 | 3.4345 | R.AQSREQLAALK.K | 1 | Q5JXL8_HUMAN |
| Q5JXL8 | 1 | 2.2666 | R.EAGGAFGK.R    | 2 | Q5JXL8_HUMAN |
| Q5JXL8 | 1 | 2.1423 | R.EAGGAFGKR.E   | 1 | Q5JXL8_HUMAN |

***Putative uncharacterized protein DKFZp686A0568 - Homo sapiens (Human)***

|        |   |        |               |   |              |
|--------|---|--------|---------------|---|--------------|
| Q5CZ93 | 2 | 3.0102 | K.RAEQELAGR.D | 1 | Q5CZ93_HUMAN |
|--------|---|--------|---------------|---|--------------|

***Putative uncharacterized protein DKFZp686F1612 - Homo sapiens (Human)***

|        |   |        |                      |   |              |
|--------|---|--------|----------------------|---|--------------|
| Q5HYE4 | 2 | 4.2846 | R.SYVQGYLSQADVDAFR.Q | 2 | Q5HYE4_HUMAN |
|--------|---|--------|----------------------|---|--------------|

***Putative uncharacterized protein DKFZp686I04144 - Homo sapiens (Human)***

|        |   |        |                      |   |              |
|--------|---|--------|----------------------|---|--------------|
| Q5HYK7 | 2 | 3.533  | R.NQIGIFPANYVK.V     | 3 | Q5HYK7_HUMAN |
| Q5HYK7 | 3 | 4.1074 | R.IKVFEGQNIETSGLPK.K | 2 | Q5HYK7_HUMAN |
| Q5HYK7 | 2 | 3.2385 | R.GPLAESSDSGKK.V     | 1 | Q5HYK7_HUMAN |
| Q5HYK7 | 2 | 3.3791 | K.SLGEPPANPPVPLQSK.P | 1 | Q5HYK7_HUMAN |
| Q5HYK7 | 2 | 3.3646 | R.GPLAESSDSGK.K      | 1 | Q5HYK7_HUMAN |

***Putative uncharacterized protein DKFZp781G1976 - Homo sapiens (Human)***



| <i>Accession No*</i>                                                                  | <i>Charge</i> | <i>XC(Max)**</i> | <i>Peptide*</i>              | <i>TC***</i> | <i>Reference No*</i> |
|---------------------------------------------------------------------------------------|---------------|------------------|------------------------------|--------------|----------------------|
| Q5H9Q2                                                                                | 3             | 3.7463           | R.GAQEKPKQISAAQSTQPQK.Q      | 1            | Q5H9Q2_HUMAN         |
| <b><i>Putative uncharacterized protein DKFZp781J1697 - Homo sapiens (Human)</i></b>   |               |                  |                              |              |                      |
| Q68CR1                                                                                | 2             | 2.8547           | R.LDISFNNGQIVVTTSIGQDLK.S    | 1            | Q68CR1_HUMAN         |
| <b><i>Putative uncharacterized protein FLJ10781 - Homo sapiens (Human)</i></b>        |               |                  |                              |              |                      |
| Q5U638                                                                                | 2             | 3.2949           | R.GQQPAEATASTSR.G            | 1            | Q5U638_HUMAN         |
| <b><i>Putative uncharacterized protein FLJ20254 - Homo sapiens (Human)</i></b>        |               |                  |                              |              |                      |
| Q6NUQ4                                                                                | 2             | 2.9859           | K.YDLTPAIQTTSTLYER.G         | 2            | Q6NUQ4_HUMAN         |
| <b><i>Putative uncharacterized protein FLJ20628 - Homo sapiens (Human)</i></b>        |               |                  |                              |              |                      |
| Q9BVS5                                                                                | 2             | 3.4873           | R.ELEDSSGDQGR.C              | 3            | Q9BVS5_HUMAN         |
| <b><i>Putative uncharacterized protein LBH - Homo sapiens (Human)</i></b>             |               |                  |                              |              |                      |
| Q53QV2                                                                                | 3             | 3.9701           | K.LKDRLPISIVPEPTEGEVESGELR.W | 1            | Q53QV2_HUMAN         |
| Q53QV2                                                                                | 2             | 3.558            | R.KDGLSYQIFPDPSDFDR.C        | 1            | Q53QV2_HUMAN         |
| Q53QV2                                                                                | 2             | 3.0008           | R.LPSIVPEPTEGEVESGELR.W      | 1            | Q53QV2_HUMAN         |
| <b><i>Putative uncharacterized protein LOC114984 - Homo sapiens (Human)</i></b>       |               |                  |                              |              |                      |
| Q96CP2                                                                                | 2             | 3.7586           | K.ASQEPSPKPGTEVIPAAPR.K      | 2            | Q96CP2_HUMAN         |
| <b><i>Putative uncharacterized protein LOC134121 - Homo sapiens (Human)</i></b>       |               |                  |                              |              |                      |
| A4QMS7                                                                                | 1             | 2.2762           | R.LDYDQK.L                   | 2            | A4QMS7_HUMAN         |
| <b><i>Putative uncharacterized protein LOC255374 - Homo sapiens (Human)</i></b>       |               |                  |                              |              |                      |
| A4D2B0                                                                                | 2             | 3.065            | R.GPILVDTGGPWAR.E            | 2            | A4D2B0_HUMAN         |
| <b><i>Putative uncharacterized protein MGC13057 - Homo sapiens (Human)</i></b>        |               |                  |                              |              |                      |
| Q53TC7                                                                                | 2             | 3.8421           | K.YHDIPYIESEGP.-             | 3            | Q53TC7_HUMAN         |
| <b><i>Putative uncharacterized protein MGC29506 - Homo sapiens (Human)</i></b>        |               |                  |                              |              |                      |
| Q8WU39                                                                                | 2             | 4.1631           | R.ELSELVYTDVLDLDR.S          | 2            | Q8WU39_HUMAN         |
| Q8WU39                                                                                | 2             | 4.0047           | R.AVAYQMWQNLAK.A             | 3            | Q8WU39_HUMAN         |
| Q8WU39                                                                                | 2             | 3.5058           | R.AVAYQM#WQNLAK.A            | 2            | Q8WU39_HUMAN         |
| Q8WU39                                                                                | 2             | 3.3141           | K.VSATREEL.-                 | 1            | Q8WU39_HUMAN         |
| <b><i>Putative uncharacterized protein MGC61571 - Homo sapiens (Human)</i></b>        |               |                  |                              |              |                      |
| Q7Z7K0                                                                                | 3             | 4.3665           | R.HVEKDVLIPIK.I              | 2            | Q7Z7K0_HUMAN         |
| <b><i>Putative uncharacterized protein PTPN18 - Homo sapiens (Human)</i></b>          |               |                  |                              |              |                      |
| Q53P42                                                                                | 2             | 4.4179           | R.GAPAGAGSGTQTGTGTGTGAR.S    | 1            | Q53P42_HUMAN         |
| <b><i>PX domain-containing protein kinase-like protein - Homo sapiens (Human)</i></b> |               |                  |                              |              |                      |

| <i>Accession No*</i>                                                                                       | <i>Charge</i> | <i>XC(Max)**</i> | <i>Peptide*</i>          | <i>TC***</i> | <i>Reference No*</i> |
|------------------------------------------------------------------------------------------------------------|---------------|------------------|--------------------------|--------------|----------------------|
| Q7Z7A4                                                                                                     | 2             | 3.4581           | R.SALENSEEHSK.Y          | 2            | PXK_HUMAN            |
| Q7Z7A4                                                                                                     | 2             | 4.4761           | R.GALLSSIQNFQK.G         | 2            | PXK_HUMAN            |
| Q7Z7A4                                                                                                     | 2             | 3.0063           | K.YFLM#KIKNQPK.E         | 2            | PXK_HUMAN            |
| <b><i>PX domain-containing protein SNX29 - Homo sapiens (Human)</i></b>                                    |               |                  |                          |              |                      |
| Q8TEQ0                                                                                                     | 2             | 3.2003           | R.KDELEEEENR.S           | 2            | SNX29_HUMAN          |
| <b><i>Pyridoxal-dependent decarboxylase domain-containing protein 1 - Homo sapiens (Human)</i></b>         |               |                  |                          |              |                      |
| Q6P996                                                                                                     | 2             | 3.3037           | R.GSDALSETSSVSHIEDLEK.V  | 1            | PDXD1_HUMAN          |
| Q6P996                                                                                                     | 2             | 4.0345           | K.GVPHPEDDHSQVEGPESLR.-  | 3            | PDXD1_HUMAN          |
| Q6P996                                                                                                     | 2             | 3.2429           | K.AQGAGVTLPTPSGSR.T      | 1            | PDXD1_HUMAN          |
| <b><i>Pyridoxine-5'-phosphate oxidase - Homo sapiens (Human)</i></b>                                       |               |                  |                          |              |                      |
| Q9NVS9                                                                                                     | 2             | 3.6118           | R.EAFEETHLTSLDPVK.Q      | 5            | PNPO_HUMAN           |
| Q9NVS9                                                                                                     | 2             | 2.868            | R.FFTNFESR.K             | 1            | PNPO_HUMAN           |
| Q9NVS9                                                                                                     | 3             | 4.6765           | R.RGLPTGDSPLGPMTHR.G     | 2            | PNPO_HUMAN           |
| Q9NVS9                                                                                                     | 4             | 4.7911           | R.GDREAFEETHLTSLDPVK.Q   | 2            | PNPO_HUMAN           |
| Q9NVS9                                                                                                     | 2             | 3.4545           | R.GLPTGDSPLGPMTHR.G      | 2            | PNPO_HUMAN           |
| Q9NVS9                                                                                                     | 2             | 3.2213           | K.ELDSNPFASLVFYWEPLNR.Q  | 1            | PNPO_HUMAN           |
| <b><i>Pyruvate dehydrogenase [lipoamide]-phosphatase 2, mitochondrial precursor - Homo sapiens (Hu</i></b> |               |                  |                          |              |                      |
| Q9P2J9                                                                                                     | 2             | 2.7304           | R.PANLGLMQSLLLQR.K       | 1            | PDP2_HUMAN           |
| <b><i>Pyruvate dehydrogenase protein X component, mitochondrial precursor - Homo sapiens (Human)</i></b>   |               |                  |                          |              |                      |
| O00330                                                                                                     | 2             | 3.0466           | K.ILMPSLSPTM#EEGNIVK.W   | 1            | ODPX_HUMAN           |
| <b><i>R3H domain-containing protein 1 - Homo sapiens (Human)</i></b>                                       |               |                  |                          |              |                      |
| Q15032                                                                                                     | 2             | 4.1784           | R.LQDEASSTQQR.R          | 3            | R3HD1_HUMAN          |
| <b><i>Rab GTPase-binding effector protein 1 - Homo sapiens (Human)</i></b>                                 |               |                  |                          |              |                      |
| Q15276                                                                                                     | 2             | 2.9525           | K.SQQLLESLQEIK.I         | 1            | RABE1_HUMAN          |
| Q15276                                                                                                     | 2             | 3.238            | K.ATVEQLMFEEK.N          | 1            | RABE1_HUMAN          |
| Q15276                                                                                                     | 2             | 5.7374           | R.AQSTDSLGTSGSLQSK.A     | 3            | RABE1_HUMAN          |
| Q15276                                                                                                     | 3             | 4.5052           | K.AIATVSENTKQEAIDEVKR.Q  | 4            | RABE1_HUMAN          |
| Q15276                                                                                                     | 2             | 4.6972           | R.LVSETEWNLLQK.E         | 4            | RABE1_HUMAN          |
| Q15276                                                                                                     | 2             | 3.427            | K.ANDQFLESQR.L           | 2            | RABE1_HUMAN          |
| Q15276                                                                                                     | 2             | 2.7121           | K.DKLTEAEDK.I            | 1            | RABE1_HUMAN          |
| Q15276                                                                                                     | 3             | 4.9699           | R.QNAVLQAAQDDLGHLR.T     | 1            | RABE1_HUMAN          |
| Q15276                                                                                                     | 2             | 3.3504           | K.QLGQIQIQAETR.D         | 2            | RABE1_HUMAN          |
| Q15276                                                                                                     | 2             | 4.6365           | R.AQASEILLEELQQGLSQAQK.R | 2            | RABE1_HUMAN          |

| <i>Accession No*</i>                                                       | <i>Charge</i> | <i>XC(Max)**</i> | <i>Peptide*</i>                     | <i>TC***</i> | <i>Reference No*</i> |
|----------------------------------------------------------------------------|---------------|------------------|-------------------------------------|--------------|----------------------|
| Q15276                                                                     | 2             | 2.8579           | R.TAADHVEEK.L                       | 3            | RABE1_HUMAN          |
| Q15276                                                                     | 2             | 4.5371           | R.TQLWEAQAEMENIK.A                  | 3            | RABE1_HUMAN          |
| Q15276                                                                     | 2             | 2.8164           | K.DKQELEDFIK.Q                      | 1            | RABE1_HUMAN          |
| Q15276                                                                     | 2             | 3.2761           | K.DNDSLQGGK.H                       | 4            | RABE1_HUMAN          |
| <b><i>Rab GTPase-binding effector protein 2 - Homo sapiens (Human)</i></b> |               |                  |                                     |              |                      |
| Q9H5N1                                                                     | 2             | 4.1998           | K.RLNEENQGLR.A                      | 1            | RABE2_HUMAN          |
| Q9H5N1                                                                     | 2             | 2.7083           | R.LNEENQGLR.A                       | 1            | RABE2_HUMAN          |
| Q9H5N1                                                                     | 2             | 3.9536           | R.SIMDEAPLTDVR.D                    | 3            | RABE2_HUMAN          |
| <b><i>Rab11 family-interacting protein 1 - Homo sapiens (Human)</i></b>    |               |                  |                                     |              |                      |
| Q6WKZ4                                                                     | 2             | 3.3501           | R.LEVSPEAQPTAR.L                    | 2            | RFIP1_HUMAN          |
| Q6WKZ4                                                                     | 2             | 3.0402           | K.QLNQVNFTLPK.K                     | 2            | RFIP1_HUMAN          |
| Q6WKZ4                                                                     | 3             | 4.3289           | R.RSEKDTAAVVSQR.Q                   | 1            | RFIP1_HUMAN          |
| Q6WKZ4                                                                     | 3             | 4.1794           | K.NKDSGSDTASAIIPSTTPSVSDDESIVK.D    | 1            | RFIP1_HUMAN          |
| Q6WKZ4                                                                     | 2             | 3.8891           | K.GEIKDSSPSSSPK.G                   | 1            | RFIP1_HUMAN          |
| Q6WKZ4                                                                     | 2             | 2.8163           | K.DTAAVVSQR.Q                       | 1            | RFIP1_HUMAN          |
| Q6WKZ4                                                                     | 2             | 3.0919           | R.VMEETPNILR.I                      | 2            | RFIP1_HUMAN          |
| <b><i>Rab11 family-interacting protein 3 - Homo sapiens (Human)</i></b>    |               |                  |                                     |              |                      |
| O75154                                                                     | 2             | 4.3344           | K.LLDEIESLTLR.L                     | 4            | RFIP3_HUMAN          |
| O75154                                                                     | 2             | 3.1559           | R.WSAGPAPGLEGGPR.D                  | 1            | RFIP3_HUMAN          |
| O75154                                                                     | 2             | 3.2833           | R.LSEEQENK.R                        | 8            | RFIP3_HUMAN          |
| O75154                                                                     | 2             | 3.7679           | R.LQQLDEENSELR.S                    | 2            | RFIP3_HUMAN          |
| O75154                                                                     | 2             | 5.0102           | R.IIVAIMETNPSILEVK.-                | 1            | RFIP3_HUMAN          |
| O75154                                                                     | 2             | 3.1772           | K.QKLLDEIESLTLR.L                   | 2            | RFIP3_HUMAN          |
| O75154                                                                     | 3             | 4.299            | R.DKEATQELIEDLRK.Q                  | 1            | RFIP3_HUMAN          |
| O75154                                                                     | 3             | 4.8161           | R.LRQENLQLVHR.A                     | 4            | RFIP3_HUMAN          |
| O75154                                                                     | 2             | 5.4464           | R.ANALLEEQLKEQLR.A                  | 3            | RFIP3_HUMAN          |
| O75154                                                                     | 2             | 3.7956           | K.SIEIENLQTR.L                      | 4            | RFIP3_HUMAN          |
| <b><i>Rab11 family-interacting protein 5 - Homo sapiens (Human)</i></b>    |               |                  |                                     |              |                      |
| Q9BXF6                                                                     | 2             | 4.7323           | R.SNSSEAVLGQEELSAQAK.V              | 7            | RFIP5_HUMAN          |
| Q9BXF6                                                                     | 2             | 3.03             | R.TYSDEANQMR.V                      | 2            | RFIP5_HUMAN          |
| Q9BXF6                                                                     | 3             | 6.1977           | R.LPEGKPVQVATPIVASSEAVAEKEGAR.K     | 2            | RFIP5_HUMAN          |
| Q9BXF6                                                                     | 2             | 2.9472           | R.TYSDEANQM#R.V                     | 1            | RFIP5_HUMAN          |
| Q9BXF6                                                                     | 2             | 3.2477           | R.SSWLSTEGGR.D                      | 2            | RFIP5_HUMAN          |
| Q9BXF6                                                                     | 4             | 5.2984           | K.VLAPGASHPGEEEEGARLPEGKPVQVATPIVAS | 2            | RFIP5_HUMAN          |
| Q9BXF6                                                                     | 2             | 3.7119           | R.SSISGSLPSSGSLQAVSSR.F             | 3            | RFIP5_HUMAN          |

| <i>Accession No*</i>                                                                   | <i>Charge</i> | <i>XC(Max)**</i> | <i>Peptide*</i>              | <i>TC***</i> | <i>Reference No*</i> |
|----------------------------------------------------------------------------------------|---------------|------------------|------------------------------|--------------|----------------------|
| Q9BXF6                                                                                 | 2             | 4.4329           | K.VLAPGASHPGEEEEGAR.L        | 7            | RFIP5_HUMAN          |
| Q9BXF6                                                                                 | 2             | 4.3869           | K.RTYSDEANQMR.V              | 1            | RFIP5_HUMAN          |
| Q9BXF6                                                                                 | 3             | 5.8222           | R.LPEGKPVQVATPIVASSEAVAEEK.E | 2            | RFIP5_HUMAN          |
| Q9BXF6                                                                                 | 1             | 2.1511           | R.FSEEGPR.S                  | 1            | RFIP5_HUMAN          |
| <b><i>RAB3A-interacting protein - Homo sapiens (Human)</i></b>                         |               |                  |                              |              |                      |
| Q96QF0                                                                                 | 2             | 3.6176           | K.IDVLQAEVAALK.T             | 1            | RAB3I_HUMAN          |
| Q96QF0                                                                                 | 2             | 5.4408           | K.TLVLSSSPTSPTQEPLPGGK.T     | 2            | RAB3I_HUMAN          |
| Q96QF0                                                                                 | 4             | 5.8347           | K.VRDQLGQELEELTASLFEEAHK.M   | 2            | RAB3I_HUMAN          |
| <b><i>RAB3A-interacting protein-like 1 - Homo sapiens (Human)</i></b>                  |               |                  |                              |              |                      |
| Q8TBN0                                                                                 | 2             | 5.1297           | R.GKIDMLQAEVTALK.T           | 2            | Q8TBN0_HUMAN         |
| <b><i>Rabenosyn-5 - Homo sapiens (Human)</i></b>                                       |               |                  |                              |              |                      |
| Q9H1K0                                                                                 | 2             | 3.2073           | K.TPSLSSTQPTR.V              | 2            | RBNS5_HUMAN          |
| Q9H1K0                                                                                 | 2             | 3.607            | R.VWSGPPAVGQER.L             | 3            | RBNS5_HUMAN          |
| Q9H1K0                                                                                 | 2             | 3.3129           | R.QLQDEYDQQQTEK.A            | 2            | RBNS5_HUMAN          |
| <b><i>Rab-interacting lysosomal protein - Homo sapiens (Human)</i></b>                 |               |                  |                              |              |                      |
| Q96NA2                                                                                 | 2             | 3.7366           | K.AESSEDETSSPAPSK.L          | 3            | RILP_HUMAN           |
| Q96NA2                                                                                 | 2             | 5.1131           | R.GKAESSEDETSSPAPSK.L        | 2            | RILP_HUMAN           |
| <b><i>Radixin - Homo sapiens (Human)</i></b>                                           |               |                  |                              |              |                      |
| P35241                                                                                 | 2             | 5.3467           | K.KTQNDVLHAENVK.A            | 6            | RADI_HUMAN           |
| P35241                                                                                 | 2             | 3.5466           | K.QLQALSSSELAQARDETK.K       | 2            | RADI_HUMAN           |
| P35241                                                                                 | 3             | 4.4082           | K.KQLQALSSSELAQARDETK.K      | 2            | RADI_HUMAN           |
| P35241                                                                                 | 2             | 4.8673           | K.QLQALSSSELAQAR.D           | 11           | RADI_HUMAN           |
| P35241                                                                                 | 2             | 2.9347           | K.QRIDEFTEAM#.-              | 3            | RADI_HUMAN           |
| P35241                                                                                 | 2             | 2.7459           | K.QRIDEFTEAM.-               | 1            | RADI_HUMAN           |
| P35241                                                                                 | 2             | 4.6321           | K.TQNDVLHAENVK.A             | 7            | RADI_HUMAN           |
| P35241                                                                                 | 2             | 3.2381           | R.AKEEAERLEK.E               | 2            | RADI_HUMAN           |
| P35241                                                                                 | 2             | 3.2009           | R.SEEERVTTETQK.N             | 3            | RADI_HUMAN           |
| P35241                                                                                 | 2             | 4.5188           | R.SEEERVTTETQKNER.V          | 3            | RADI_HUMAN           |
| P35241                                                                                 | 2             | 5.7646           | K.NQEQLAAELAEFTAK.I          | 3            | RADI_HUMAN           |
| P35241                                                                                 | 3             | 4.3793           | K.KKEEEATEWQHK.A             | 2            | RADI_HUMAN           |
| <b><i>RalBP1-associated Eps domain-containing protein 1 - Homo sapiens (Human)</i></b> |               |                  |                              |              |                      |
| Q96D71                                                                                 | 2             | 2.7006           | K.GSVSHDTVQPR.T              | 1            | REPS1_HUMAN          |
| <b><i>Ran-binding protein 2-like 6 - Homo sapiens (Human)</i></b>                      |               |                  |                              |              |                      |

| <i>Accession No*</i>                                                                                     | <i>Charge</i> | <i>XC(Max)**</i> | <i>Peptide*</i>                 | <i>TC***</i> | <i>Reference No*</i> |
|----------------------------------------------------------------------------------------------------------|---------------|------------------|---------------------------------|--------------|----------------------|
| Q68DN6                                                                                                   | 2             | 4.4917           | K.SNDSETSSVAQSGSESK.V           | 6            | RBP26_HUMAN          |
| <b><i>Ran-binding protein 3 - Homo sapiens (Human)</i></b>                                               |               |                  |                                 |              |                      |
| Q9H6Z4                                                                                                   | 3             | 4.381            | K.KDPATQQAFVFGQNL.R.D           | 1            | RANB3_HUMAN          |
| Q9H6Z4                                                                                                   | 2             | 2.7569           | R.SVLRPAVLQAPQPK.A              | 1            | RANB3_HUMAN          |
| <b><i>Ran-specific GTPase-activating protein - Homo sapiens (Human)</i></b>                              |               |                  |                                 |              |                      |
| P43487                                                                                                   | 2             | 3.1247           | K.TLEEDDEELFK.M                 | 2            | RANG_HUMAN           |
| P43487                                                                                                   | 2             | 3.959            | R.FASENDLPEWKER.G               | 2            | RANG_HUMAN           |
| P43487                                                                                                   | 1             | 3.1795           | R.FLNAENAQK.F                   | 7            | RANG_HUMAN           |
| P43487                                                                                                   | 2             | 3.5029           | K.VAEKLEALSVK.E                 | 1            | RANG_HUMAN           |
| P43487                                                                                                   | 2             | 3.5373           | K.EETKEDAEKQ.-                  | 9            | RANG_HUMAN           |
| P43487                                                                                                   | 2             | 3.9692           | R.FASENDLPEWK.E                 | 7            | RANG_HUMAN           |
| <b><i>Ras association domain-containing protein 8 - Homo sapiens (Human)</i></b>                         |               |                  |                                 |              |                      |
| Q8NHQ8                                                                                                   | 2             | 4.7264           | R.QVNLQQFIQQTGTK.V              | 4            | RASF8_HUMAN          |
| Q8NHQ8                                                                                                   | 2             | 4.7817           | R.LQDKEQELEQLTK.E               | 1            | RASF8_HUMAN          |
| Q8NHQ8                                                                                                   | 2             | 3.4159           | K.YNSNLEEEIVR.L                 | 2            | RASF8_HUMAN          |
| <b><i>Ras GTPase-activating protein-binding protein 1 - Homo sapiens (Human)</i></b>                     |               |                  |                                 |              |                      |
| Q13283                                                                                                   | 2             | 4.1507           | K.SSSPAPADIAQTVQEDLR.T          | 1            | G3BP1_HUMAN          |
| Q13283                                                                                                   | 2             | 4.373            | R.FMQTFVLAPEGSVANK.F            | 2            | G3BP1_HUMAN          |
| <b><i>Ras GTPase-activating protein-binding protein 2 - Homo sapiens (Human)</i></b>                     |               |                  |                                 |              |                      |
| Q9UN86                                                                                                   | 2             | 3.6236           | K.TEELKPQVEEK.N                 | 2            | G3BP2_HUMAN          |
| Q9UN86                                                                                                   | 2             | 3.6112           | R.VEAKPEVQSQPPR.V               | 3            | G3BP2_HUMAN          |
| Q9UN86                                                                                                   | 2             | 3.2535           | K.FM#QTFVLAPEGSVPNK.F           | 2            | G3BP2_HUMAN          |
| Q9UN86                                                                                                   | 2             | 3.0786           | K.FMQTFVLAPEGSVPNK.F            | 1            | G3BP2_HUMAN          |
| Q9UN86                                                                                                   | 2             | 4.304            | K.LPNFGFVVFDDSEPVQR.I           | 1            | G3BP2_HUMAN          |
| Q9UN86                                                                                                   | 2             | 2.8392           | K.FYVHNDMFR.Y                   | 2            | G3BP2_HUMAN          |
| <b><i>Ras GTPase-activating-like protein IQGAP2 - Homo sapiens (Human)</i></b>                           |               |                  |                                 |              |                      |
| Q13576                                                                                                   | 2             | 4.1334           | K.GVLLDIDDLQTNQFK.N             | 2            | IQGA2_HUMAN          |
| <b><i>Ras-associated and pleckstrin homology domains-containing protein 1 - Homo sapiens (Human)</i></b> |               |                  |                                 |              |                      |
| Q70E73                                                                                                   | 2             | 3.3739           | K.RPSVDSLVS.K.F                 | 3            | RAPH1_HUMAN          |
| Q70E73                                                                                                   | 3             | 4.6693           | K.KQPAFPASYIPSPPTPPVPVPPPTLPK.Q | 2            | RAPH1_HUMAN          |
| Q70E73                                                                                                   | 2             | 4.3551           | K.VAVVNPQPQQWSK.M               | 2            | RAPH1_HUMAN          |
| Q70E73                                                                                                   | 2             | 4.2461           | K.SSLSVQPGFLADLNR.T             | 2            | RAPH1_HUMAN          |
| Q70E73                                                                                                   | 2             | 3.3193           | R.SQSIVSSVFSEAWK.R              | 1            | RAPH1_HUMAN          |

| <i>Accession No*</i>                                                                          | <i>Charge</i> | <i>XC(Max)**</i> | <i>Peptide*</i>               | <i>TC***</i> | <i>Reference No*</i> |
|-----------------------------------------------------------------------------------------------|---------------|------------------|-------------------------------|--------------|----------------------|
| Q70E73                                                                                        | 2             | 3.3773           | K.SSSGAEHPEPK.R               | 5            | RAPH1_HUMAN          |
| <b><i>Ras-interacting protein 1 - Homo sapiens (Human)</i></b>                                |               |                  |                               |              |                      |
| Q5U651                                                                                        | 2             | 3.5676           | R.GSGTGTTGSSGAGGPGTPGGAQR.W   | 2            | RAIN_HUMAN           |
| <b><i>Ras-related protein Rab-10 - Homo sapiens (Human)</i></b>                               |               |                  |                               |              |                      |
| P61026                                                                                        | 2             | 3.1885           | K.AFLTLAEDILR.K               | 2            | RAB10_HUMAN          |
| <b><i>Ras-related protein Rab-1A - Homo sapiens (Human)</i></b>                               |               |                  |                               |              |                      |
| P62820                                                                                        | 2             | 2.9507           | R.MGPGATAGGAEK.S              | 2            | RAB1A_HUMAN          |
| P62820                                                                                        | 2             | 2.8797           | R.M#GPGATAGGAEK.S             | 1            | RAB1A_HUMAN          |
| <b><i>Ras-related protein Rab-1B - Homo sapiens (Human)</i></b>                               |               |                  |                               |              |                      |
| Q9H0U4                                                                                        | 2             | 3.2142           | K.NATNVEQAFMTMAAEIK.K         | 1            | RAB1B_HUMAN          |
| <b><i>Ras-related protein Rab-2A - Homo sapiens (Human)</i></b>                               |               |                  |                               |              |                      |
| P61019                                                                                        | 2             | 4.0826           | K.IQEGVFDINNEANGIK.I          | 1            | RAB2A_HUMAN          |
| <b><i>Ras-related protein Rab-5C - Homo sapiens (Human)</i></b>                               |               |                  |                               |              |                      |
| P51148                                                                                        | 2             | 3.2184           | K.TAMNVNEIFMAIAK.K            | 2            | RAB5C_HUMAN          |
| <b><i>Ras-related protein Rab-7a - Homo sapiens (Human)</i></b>                               |               |                  |                               |              |                      |
| P51149                                                                                        | 2             | 4.321            | K.EAINVEQAFQTIAR.N            | 3            | RAB7A_HUMAN          |
| <b><i>RAS-responsive element-binding protein 1 - Homo sapiens (Human)</i></b>                 |               |                  |                               |              |                      |
| Q92766                                                                                        | 2             | 3.65             | K.VADPGPASTGSNTTASDSLGGSPVK.A | 2            | RREB1_HUMAN          |
| Q92766                                                                                        | 2             | 3.5511           | R.DREQPSEGATELR.Q             | 2            | RREB1_HUMAN          |
| Q92766                                                                                        | 2             | 2.7573           | K.AATTATPAATTSPK.E            | 1            | RREB1_HUMAN          |
| <b><i>Receptor expression-enhancing protein 5 - Homo sapiens (Human)</i></b>                  |               |                  |                               |              |                      |
| Q00765                                                                                        | 2             | 2.9785           | K.AKETADAITK.E                | 1            | REEP5_HUMAN          |
| <b><i>Receptor expression-enhancing protein 6 - Homo sapiens (Human)</i></b>                  |               |                  |                               |              |                      |
| Q96HR9                                                                                        | 2             | 4.5344           | R.NLVTEVLGALEAK.T             | 2            | REEP6_HUMAN          |
| <b><i>Receptor tyrosine-protein kinase erbB-2 precursor - Homo sapiens (Human)</i></b>        |               |                  |                               |              |                      |
| P04626                                                                                        | 2             | 2.9861           | R.SGGGDLTLGLEPSEEEAPR.S       | 1            | ERBB2_HUMAN          |
| P04626                                                                                        | 2             | 3.0077           | R.SPLAPSEGAGSDVFDGLMGAAK.G    | 2            | ERBB2_HUMAN          |
| <b><i>Receptor-interacting serine/threonine-protein kinase 2 - Homo sapiens (Human)</i></b>   |               |                  |                               |              |                      |
| O43353                                                                                        | 2             | 3.7078           | R.LQPGIAQQWIQSK.R             | 3            | RIPK2_HUMAN          |
| <b><i>Receptor-type tyrosine-protein phosphatase eta precursor - Homo sapiens (Human)</i></b> |               |                  |                               |              |                      |
| Q12913                                                                                        | 3             | 4.2902           | K.SPDGASEYVYHLVIESK.H         | 1            | PTPRJ_HUMAN          |

| <i>Accession No*</i>                                                                         | <i>Charge</i> | <i>XC(Max)**</i> | <i>Peptide*</i>                     | <i>TC***</i> | <i>Reference No*</i> |
|----------------------------------------------------------------------------------------------|---------------|------------------|-------------------------------------|--------------|----------------------|
| Q12913                                                                                       | 2             | 3.1461           | K.FSGFEASHGPIK.A                    | 2            | PTPRJ_HUMAN          |
| <b><i>Receptor-type tyrosine-protein phosphatase mu precursor - Homo sapiens (Human)</i></b> |               |                  |                                     |              |                      |
| P28827                                                                                       | 2             | 2.7873           | R.IYFQAASR.A                        | 1            | PTPRM_HUMAN          |
| P28827                                                                                       | 2             | 2.8909           | K.GAATPKPVPEPEK.Q                   | 2            | PTPRM_HUMAN          |
| <b><i>Regulator of G-protein signaling 10 - Homo sapiens (Human)</i></b>                     |               |                  |                                     |              |                      |
| O43665                                                                                       | 2             | 3.9698           | R.TEEEEEDLPDAQTAAR.R                | 5            | RGS10_HUMAN          |
| <b><i>Regulator of nonsense transcripts 1 - Homo sapiens (Human)</i></b>                     |               |                  |                                     |              |                      |
| Q92900                                                                                       | 2             | 3.6128           | R.AYQHGGVTGLSQY.-                   | 2            | RENT1_HUMAN          |
| <b><i>Regulator of nonsense transcripts 3A - Homo sapiens (Human)</i></b>                    |               |                  |                                     |              |                      |
| Q9H1J1                                                                                       | 2             | 3.1665           | R.SQEQESEAAQR.Y                     | 2            | REN3A_HUMAN          |
| Q9H1J1                                                                                       | 2             | 3.0938           | K.GSQDSGAPGEAM#ER.L                 | 2            | REN3A_HUMAN          |
| <b><i>Regulator of nonsense transcripts 3B - Homo sapiens (Human)</i></b>                    |               |                  |                                     |              |                      |
| Q9BZ17                                                                                       | 2             | 2.8147           | K.FLESYATDNEK.M                     | 1            | REN3B_HUMAN          |
| Q9BZ17                                                                                       | 3             | 4.0411           | K.KAESTESIGSSEKTEK.K                | 1            | REN3B_HUMAN          |
| Q9BZ17                                                                                       | 2             | 2.7043           | K.M#TSTPETLLEEIEAK.N                | 1            | REN3B_HUMAN          |
| Q9BZ17                                                                                       | 2             | 2.7296           | K.NQEDIILFR.D                       | 1            | REN3B_HUMAN          |
| <b><i>Remodeling and spacing factor 1 - Homo sapiens (Human)</i></b>                         |               |                  |                                     |              |                      |
| Q96T23                                                                                       | 3             | 3.9608           | K.TGELEKETAPLRK.D                   | 1            | RSF1_HUMAN           |
| Q96T23                                                                                       | 3             | 3.8237           | K.TEKEEEKTNVGR.T                    | 1            | RSF1_HUMAN           |
| Q96T23                                                                                       | 2             | 2.8305           | R.GEGEDEVVEESTALQK.T                | 1            | RSF1_HUMAN           |
| Q96T23                                                                                       | 2             | 3.0739           | R.YGPLLDLPELPPPELER.V               | 1            | RSF1_HUMAN           |
| <b><i>Replication factor C subunit 1 - Homo sapiens (Human)</i></b>                          |               |                  |                                     |              |                      |
| P35251                                                                                       | 2             | 3.8696           | K.IIDEDGLLNLR.T                     | 2            | RFC1_HUMAN           |
| P35251                                                                                       | 2             | 3.1005           | K.LTPTSVLDYFGTGSVQR.S               | 1            | RFC1_HUMAN           |
| <b><i>Response gene to complement 32 protein - Homo sapiens (Human)</i></b>                  |               |                  |                                     |              |                      |
| Q9H4X1                                                                                       | 2             | 3.0395           | K.ELEAFIADLDKTLASM#.-               | 1            | RGC32_HUMAN          |
| Q9H4X1                                                                                       | 3             | 5.418            | K.LGDTKELEAFIADLDK.T                | 1            | RGC32_HUMAN          |
| <b><i>Reticulocalbin-1 precursor - Homo sapiens (Human)</i></b>                              |               |                  |                                     |              |                      |
| Q15293                                                                                       | 2             | 4.376            | K.TFDQLTPDESKER.L                   | 5            | RCN1_HUMAN           |
| Q15293                                                                                       | 3             | 4.6069           | K.IVDRIDNDGDGFVTTEELK.T             | 5            | RCN1_HUMAN           |
| Q15293                                                                                       | 3             | 5.9503           | K.LTKEEILENWNMFVGSQATNYGEDLTKNHDEL. | 2            | RCN1_HUMAN           |
| Q15293                                                                                       | 2             | 3.2622           | K.DGKLDKDEIR.H                      | 2            | RCN1_HUMAN           |
| Q15293                                                                                       | 2             | 4.6195           | R.IDNDGDGFVTTEELK.T                 | 4            | RCN1_HUMAN           |

| <i>Accession No*</i>                                                  | <i>Charge</i> | <i>XC(Max)**</i> | <i>Peptide*</i>                     | <i>TC***</i> | <i>Reference No*</i> |
|-----------------------------------------------------------------------|---------------|------------------|-------------------------------------|--------------|----------------------|
| Q15293                                                                | 2             | 4.9265           | R.HLVYESDKNKDEK.L                   | 2            | RCN1_HUMAN           |
| Q15293                                                                | 3             | 4.7488           | R.HWILPQDYDHAQAEAR.H                | 3            | RCN1_HUMAN           |
| Q15293                                                                | 2             | 2.7949           | K.RYIFDNVAK.V                       | 1            | RCN1_HUMAN           |
| <b><i>Reticulocalbin-3 precursor - Homo sapiens (Human)</i></b>       |               |                  |                                     |              |                      |
| Q96D15                                                                | 2             | 3.1665           | R.VADQDGDSMATR.E                    | 2            | RCN3_HUMAN           |
| Q96D15                                                                | 2             | 3.9563           | R.AGDGDGWWSLAELR.A                  | 2            | RCN3_HUMAN           |
| Q96D15                                                                | 2             | 3.5315           | R.VADQDGDSM#ATR.E                   | 2            | RCN3_HUMAN           |
| Q96D15                                                                | 2             | 3.3305           | R.DIVIAETLEDLDR.N                   | 1            | RCN3_HUMAN           |
| Q96D15                                                                | 2             | 2.7236           | R.EVAKEFDQLTPEESQAR.L               | 1            | RCN3_HUMAN           |
| <b><i>Reticulon-1 - Homo sapiens (Human)</i></b>                      |               |                  |                                     |              |                      |
| Q16799                                                                | 3             | 4.3307           | K.GLSYETAENPRPVGQLADRPEVK.A         | 1            | RTN1_HUMAN           |
| Q16799                                                                | 2             | 3.4061           | R.GLFSSDSGIEMTPAESTEVNK.I           | 1            | RTN1_HUMAN           |
| <b><i>Retinol dehydrogenase 13 - Homo sapiens (Human)</i></b>         |               |                  |                                     |              |                      |
| Q8NBN7                                                                | 2             | 3.2596           | K.APAPEAEDEEVAR.R                   | 1            | RDH13_HUMAN          |
| <b><i>Rheumatoid factor D5 light chain - Homo sapiens (Human)</i></b> |               |                  |                                     |              |                      |
| A0N5G5                                                                | 2             | 4.409            | -.EIVLTQSPATLSLSPGER.A              | 2            | A0N5G5_HUMAN         |
| <b><i>Rho GDP-dissociation inhibitor 1 - Homo sapiens (Human)</i></b> |               |                  |                                     |              |                      |
| P52565                                                                | 2             | 4.1822           | K.SIQEIQLDKDDESLR.K                 | 1            | GDIR_HUMAN           |
| P52565                                                                | 3             | 4.8357           | K.SIQEIQLDKDDESLRK.Y                | 5            | GDIR_HUMAN           |
| <b><i>Rho GDP-dissociation inhibitor 2 - Homo sapiens (Human)</i></b> |               |                  |                                     |              |                      |
| P52566                                                                | 4             | 4.8278           | K.APEPHVEEDDDDELDSKLNYPKPPQK.S      | 1            | GDIS_HUMAN           |
| P52566                                                                | 3             | 4.8021           | K.APEPHVEEDDDDELDSK.L               | 2            | GDIS_HUMAN           |
| P52566                                                                | 3             | 4.3539           | K.SLKELQEMDKDDESLIK.Y               | 2            | GDIS_HUMAN           |
| P52566                                                                | 2             | 3.963            | K.TLLGDGPVVTDPK.A                   | 3            | GDIS_HUMAN           |
| P52566                                                                | 2             | 3.7522           | K.ELQEMDKDDESLIK.Y                  | 2            | GDIS_HUMAN           |
| <b><i>Rho GTPase-activating protein 17 - Homo sapiens (Human)</i></b> |               |                  |                                     |              |                      |
| Q68EM7                                                                | 3             | 4.2013           | R.SPSPPTQHTGQPPGQPSAPSQLSAPR.R      | 2            | RHG17_HUMAN          |
| Q68EM7                                                                | 2             | 3.9798           | K.DPVSAAVPAPGR.N                    | 3            | RHG17_HUMAN          |
| Q68EM7                                                                | 3             | 5.8286           | R.NRPSVPPPPQPPGVHSAGDSSLTNTAPTASK.I | 2            | RHG17_HUMAN          |
| <b><i>Rho GTPase-activating protein 18 - Homo sapiens (Human)</i></b> |               |                  |                                     |              |                      |
| Q8N392                                                                | 3             | 4.3678           | K.SSENSQEDQEVVVVKEPDEGELEEEWLK.E    | 1            | RHG18_HUMAN          |
| Q8N392                                                                | 2             | 3.8377           | R.DDEASNLVGEEK.L                    | 3            | RHG18_HUMAN          |
| Q8N392                                                                | 2             | 4.5992           | R.FLSQESGVAQTLK.K                   | 6            | RHG18_HUMAN          |



| <i>Accession No*</i>                                                           | <i>Charge</i> | <i>XC(Max)**</i> | <i>Peptide*</i>                      | <i>TC***</i> | <i>Reference No*</i> |
|--------------------------------------------------------------------------------|---------------|------------------|--------------------------------------|--------------|----------------------|
| Q8N392                                                                         | 2             | 5.2577           | K.KGEVFLYEIGGNIGER.C                 | 3            | RHG18_HUMAN          |
| Q8N392                                                                         | 2             | 3.4313           | R.YGQYTMNQESTTIK.V                   | 2            | RHG18_HUMAN          |
| Q8N392                                                                         | 2             | 3.0407           | K.ETAPGGTESQSLR.T                    | 1            | RHG18_HUMAN          |
| Q8N392                                                                         | 2             | 3.8526           | K.DLYQLNPNAEWWIK.S                   | 2            | RHG18_HUMAN          |
| Q8N392                                                                         | 2             | 3.839            | K.RVETVSQTLR.K                       | 2            | RHG18_HUMAN          |
| <b><i>Rho GTPase-activating protein 21 - Homo sapiens (Human)</i></b>          |               |                  |                                      |              |                      |
| Q5T5U3                                                                         | 2             | 3.4521           | R.TGVSPGDVSDSATS DSTK.S              | 2            | Q5T5U3_HUMAN         |
| Q5T5U3                                                                         | 2             | 3.6006           | R.TDSAPDQQVETGK.S                    | 2            | Q5T5U3_HUMAN         |
| <b><i>Rho GTPase-activating protein 24 - Homo sapiens (Human)</i></b>          |               |                  |                                      |              |                      |
| Q8N264                                                                         | 2             | 3.8096           | R.M#GILNSDTLGNPTNVR.N                | 1            | RHG24_HUMAN          |
| Q8N264                                                                         | 2             | 2.7237           | K.RNDMLQK.E                          | 1            | RHG24_HUMAN          |
| Q8N264                                                                         | 2             | 4.2992           | R.MGILNSDTLGNPTNVR.N                 | 1            | RHG24_HUMAN          |
| <b><i>Rho GTPase-activating protein 25 - Homo sapiens (Human)</i></b>          |               |                  |                                      |              |                      |
| P42331                                                                         | 2             | 3.7613           | K.ALEEEVKEFVK.S                      | 2            | RHG25_HUMAN          |
| P42331                                                                         | 2             | 2.8027           | R.LNEELEKEK.K                        | 1            | RHG25_HUMAN          |
| <b><i>Rho GTPase-activating protein 6 - Homo sapiens (Human)</i></b>           |               |                  |                                      |              |                      |
| O43182                                                                         | 2             | 3.6832           | R.LGDAGWLDWQR.E                      | 1            | RHG06_HUMAN          |
| <b><i>Rho guanine nucleotide exchange factor - Homo sapiens (Human)</i></b>    |               |                  |                                      |              |                      |
| Q5T2V0                                                                         | 2             | 5.204            | K.SLVDTVYALKDEVQELR.Q                | 3            | Q5T2V0_HUMAN         |
| Q5T2V0                                                                         | 2             | 2.7294           | K.NMNDPAWDETNL.-                     | 1            | Q5T2V0_HUMAN         |
| Q17RW1                                                                         | 3             | 3.7399           | R.EPAPADGAALHSEEDGSIYEMADDPDVWVR.    | 1            | Q17RW1_HUMAN         |
| <b><i>Rho guanine nucleotide exchange factor 12 - Homo sapiens (Human)</i></b> |               |                  |                                      |              |                      |
| Q9NZN5                                                                         | 2             | 4.7311           | R.TASQGPQTDSVIQNSENIK.A              | 2            | ARHGC_HUMAN          |
| Q9NZN5                                                                         | 2             | 3.3675           | K.QVGETSAPGDTLDGTPR.T                | 4            | ARHGC_HUMAN          |
| Q9NZN5                                                                         | 2             | 3.7858           | R.LQLLQEDYNR.T                       | 2            | ARHGC_HUMAN          |
| Q9NZN5                                                                         | 2             | 4.7563           | K.HLSTPSSVSPEQDSAK.L                 | 1            | ARHGC_HUMAN          |
| Q9NZN5                                                                         | 3             | 6.7412           | K.ATGSAQDGA VVTPSRPLGDTLT VSEAETDPGD | 1            | ARHGC_HUMAN          |
| <b><i>Rho guanine nucleotide exchange factor 16 - Homo sapiens (Human)</i></b> |               |                  |                                      |              |                      |
| Q5VV41                                                                         | 3             | 4.5597           | K.LQALAEEPSQPHTR.S                   | 2            | ARHGG_HUMAN          |
| Q5VV41                                                                         | 2             | 4.4735           | R.LDAGGNPASGLPMVR.G                  | 3            | ARHGG_HUMAN          |
| Q5VV41                                                                         | 4             | 6.724            | R.VRDDAAAFQPQVPAPPQPRPPGHEEPWPIVLST  | 1            | ARHGG_HUMAN          |
| Q5VV41                                                                         | 2             | 3.0014           | K.LGTQQLIPK.S                        | 1            | ARHGG_HUMAN          |
| Q5VV41                                                                         | 2             | 3.793            | R.LDAGGNPASGLPM#VR.G                 | 1            | ARHGG_HUMAN          |

| <i>Accession No*</i>                                                                    | <i>Charge</i> | <i>XC(Max)**</i> | <i>Peptide*</i>              | <i>TC***</i> | <i>Reference No*</i> |
|-----------------------------------------------------------------------------------------|---------------|------------------|------------------------------|--------------|----------------------|
| <b><i>Rho guanine nucleotide exchange factor 17 - Homo sapiens (Human)</i></b>          |               |                  |                              |              |                      |
| Q96PE2                                                                                  | 2             | 5.0662           | R.DGGVLPAAAEAAEGPAR.G        | 5            | ARHGH_HUMAN          |
| Q96PE2                                                                                  | 2             | 4.7933           | R.DEGSQDQTGSLSR.A            | 4            | ARHGH_HUMAN          |
| Q96PE2                                                                                  | 2             | 3.4434           | R.SPSFGAGEGLLR.S             | 2            | ARHGH_HUMAN          |
| Q96PE2                                                                                  | 2             | 3.4443           | R.MGAQQDDGSDAPPGSPDWAGDVTR.G | 1            | ARHGH_HUMAN          |
| Q96PE2                                                                                  | 2             | 2.8133           | R.LDDGSAGTR.D                | 1            | ARHGH_HUMAN          |
| Q96PE2                                                                                  | 2             | 2.8947           | R.AATSEPTGFSVDSNLLGSLSPK.T   | 2            | ARHGH_HUMAN          |
| <b><i>Rho guanine nucleotide exchange factor 5 - Homo sapiens (Human)</i></b>           |               |                  |                              |              |                      |
| Q12774                                                                                  | 2             | 4.0995           | R.LESLSETPGPSSPR.Q           | 2            | ARHG5_HUMAN          |
| <b><i>Ribonuclease P protein subunit p29 - Homo sapiens (Human)</i></b>                 |               |                  |                              |              |                      |
| O95707                                                                                  | 2             | 3.6331           | K.EANDSDVQPSGAQR.A           | 2            | RPP29_HUMAN          |
| <b><i>Ribonuclease T2 precursor - Homo sapiens (Human)</i></b>                          |               |                  |                              |              |                      |
| O00584                                                                                  | 4             | 4.8444           | K.LGIKPSINYQVADFKDALAR.V     | 1            | RNT2_HUMAN           |
| <b><i>Ribonuclease UK114 - Homo sapiens (Human)</i></b>                                 |               |                  |                              |              |                      |
| P52758                                                                                  | 2             | 4.5489           | K.APGAIGPYSQAVLVDR.T         | 5            | UK114_HUMAN          |
| P52758                                                                                  | 1             | 2.6173           | K.NMGEILK.A                  | 2            | UK114_HUMAN          |
| P52758                                                                                  | 3             | 5.5859           | K.TTVLLADINDFNTVNEIYK.Q      | 6            | UK114_HUMAN          |
| P52758                                                                                  | 2             | 3.5691           | R.AAYQVAALPK.G               | 5            | UK114_HUMAN          |
| <b><i>Ribosomal L1 domain-containing protein 1 - Homo sapiens (Human)</i></b>           |               |                  |                              |              |                      |
| O76021                                                                                  | 3             | 4.1624           | K.IKEEAVKEK.S                | 3            | RL1D1_HUMAN          |
| <b><i>Ribosome recycling factor, mitochondrial precursor - Homo sapiens (Human)</i></b> |               |                  |                              |              |                      |
| Q96E11                                                                                  | 2             | 4.1116           | K.QISQMADDTVAELDR.H          | 1            | RRFM_HUMAN           |
| Q96E11                                                                                  | 2             | 4.0148           | K.QISQM#ADDTVAELDR.H         | 4            | RRFM_HUMAN           |
| Q96E11                                                                                  | 2             | 3.0038           | K.SVIEALKDNFNK.T             | 1            | RRFM_HUMAN           |
| Q96E11                                                                                  | 2             | 3.4132           | K.SKDTVSEDITR.L              | 2            | RRFM_HUMAN           |
| <b><i>Ribosome-binding protein 1 - Homo sapiens (Human)</i></b>                         |               |                  |                              |              |                      |
| Q9P2E9                                                                                  | 2             | 5.2119           | K.TLVSTVGSM#VFNEGEAQR.L      | 3            | RRBP1_HUMAN          |
| Q9P2E9                                                                                  | 2             | 3.1538           | K.LQSSEAEVR.S                | 4            | RRBP1_HUMAN          |
| Q9P2E9                                                                                  | 2             | 2.8012           | K.TTQEQLAR.E                 | 2            | RRBP1_HUMAN          |
| Q9P2E9                                                                                  | 2             | 4.1449           | R.NTDVAQSPEAPKQEAPAK.K       | 4            | RRBP1_HUMAN          |
| Q9P2E9                                                                                  | 2             | 5.6004           | R.QLLLESQSLDAAK.S            | 2            | RRBP1_HUMAN          |
| Q9P2E9                                                                                  | 2             | 5.4559           | K.TLVSTVGSMVFNEGEAQR.L       | 7            | RRBP1_HUMAN          |
| Q9P2E9                                                                                  | 2             | 4.9188           | K.ADSVANQGTVKVEGITNQGK.K     | 2            | RRBP1_HUMAN          |

| <i>Accession No*</i> | <i>Charge</i> | <i>XC(Max)**</i> | <i>Peptide*</i>            | <i>TC***</i> | <i>Reference No*</i> |
|----------------------|---------------|------------------|----------------------------|--------------|----------------------|
| Q9P2E9               | 3             | 3.7513           | K.KGEPGPPDADGPLYLPYK.T     | 2            | RRBP1_HUMAN          |
| Q9P2E9               | 2             | 3.9403           | K.KGEGAPIQ GK.K            | 14           | RRBP1_HUMAN          |
| Q9P2E9               | 3             | 5.5634           | K.KADSVANQG TKVEGITNQ GK.K | 3            | RRBP1_HUMAN          |
| Q9P2E9               | 2             | 3.0372           | K.HPPAPAEPSSDLASK.L        | 2            | RRBP1_HUMAN          |
| Q9P2E9               | 2             | 3.5906           | K.KLQEQL EK.A              | 6            | RRBP1_HUMAN          |
| Q9P2E9               | 1             | 2.724            | K.EVQQLQ GK.I              | 2            | RRBP1_HUMAN          |
| Q9P2E9               | 2             | 2.8497           | K.GEPGPPDADGPLYLPYK.T      | 2            | RRBP1_HUMAN          |
| Q9P2E9               | 2             | 3.3574           | K.RLDEVSR.E                | 4            | RRBP1_HUMAN          |
| Q9P2E9               | 2             | 4.5064           | K.AQEQQQMAELHSK.L          | 6            | RRBP1_HUMAN          |
| Q9P2E9               | 3             | 5.2532           | K.KKGEPGPPDADGPLYLPYK.T    | 3            | RRBP1_HUMAN          |
| Q9P2E9               | 2             | 3.0393           | K.AGIIQD TWHK.A            | 3            | RRBP1_HUMAN          |
| Q9P2E9               | 3             | 4.4255           | K.AEGAQNQGQKGEQAQNQGK.K    | 1            | RRBP1_HUMAN          |
| Q9P2E9               | 2             | 3.0283           | K.SEA VRQDEQQR.K           | 1            | RRBP1_HUMAN          |
| Q9P2E9               | 1             | 2.1942           | K.GEGAPIQ GK.K             | 1            | RRBP1_HUMAN          |
| Q9P2E9               | 3             | 4.4894           | K.KLQEQL KAEDGSSSK.E       | 1            | RRBP1_HUMAN          |
| Q9P2E9               | 2             | 3.9171           | K.SVEEEEQVWR.A             | 5            | RRBP1_HUMAN          |
| Q9P2E9               | 2             | 3.6006           | K.QVLQLQASHR.E             | 2            | RRBP1_HUMAN          |
| Q9P2E9               | 2             | 4.7543           | K.LQEQL KAEDGSSSK.E        | 3            | RRBP1_HUMAN          |
| Q9P2E9               | 2             | 2.7061           | K.KLTSDLGR.A               | 1            | RRBP1_HUMAN          |
| Q9P2E9               | 2             | 4.7876           | K.LLATEQEDA AVAK.S         | 9            | RRBP1_HUMAN          |
| Q9P2E9               | 2             | 4.2642           | K.LKGELESSDQVR.E           | 4            | RRBP1_HUMAN          |
| Q9P2E9               | 3             | 4.6083           | K.TQLEWTEAILEDEQTQR.Q      | 4            | RRBP1_HUMAN          |
| Q9P2E9               | 2             | 4.1106           | K.AQEQQQQM#AELHSK.L        | 2            | RRBP1_HUMAN          |
| Q9P2E9               | 2             | 3.5852           | R.SILAETEGM#LR.D           | 2            | RRBP1_HUMAN          |
| Q9P2E9               | 2             | 2.8635           | K.ATQKGD PVAILK.R          | 1            | RRBP1_HUMAN          |
| Q9P2E9               | 2             | 3.323            | R.SIEALLEAGQAR.D           | 5            | RRBP1_HUMAN          |
| Q9P2E9               | 2             | 4.98             | R.TLQEQL ENGPNTQLAR.L      | 7            | RRBP1_HUMAN          |
| Q9P2E9               | 2             | 2.9309           | K.TESASVQGR.N              | 2            | RRBP1_HUMAN          |
| Q9P2E9               | 3             | 3.9962           | R.QLLLESQSQLDAAKSEAQK.Q    | 1            | RRBP1_HUMAN          |
| Q9P2E9               | 2             | 3.3112           | R.EQEITAVQAR.M             | 2            | RRBP1_HUMAN          |
| Q9P2E9               | 2             | 4.4061           | R.AKVGAAEEELQK.S           | 2            | RRBP1_HUMAN          |
| Q9P2E9               | 3             | 6.2869           | R.ADAEKAQEQQQMAELHSK.L     | 5            | RRBP1_HUMAN          |
| Q9P2E9               | 3             | 5.5769           | R.ADAEKAQEQQQM#AELHSK.L    | 1            | RRBP1_HUMAN          |
| Q9P2E9               | 2             | 4.0568           | K.VGAAEEELQK.S             | 6            | RRBP1_HUMAN          |
| Q9P2E9               | 2             | 2.8126           | K.GELESSDQVR.E             | 1            | RRBP1_HUMAN          |
| Q9P2E9               | 1             | 2.5658           | K.VEGITNQ GK.K             | 4            | RRBP1_HUMAN          |
| Q9P2E9               | 2             | 5.8626           | R.DAQDVQASQA EADQQQTR.L    | 14           | RRBP1_HUMAN          |

| <i>Accession No*</i> | <i>Charge</i> | <i>XC(Max)**</i> | <i>Peptide*</i>         | <i>TC***</i> | <i>Reference No*</i> |
|----------------------|---------------|------------------|-------------------------|--------------|----------------------|
| Q9P2E9               | 1             | 2.1864           | R.MQASYR.E              | 1            | RRBP1_HUMAN          |
| Q9P2E9               | 2             | 2.7214           | R.ELNKEMAAEK.A          | 1            | RRBP1_HUMAN          |
| Q9P2E9               | 3             | 4.6936           | R.LKELESQVSGLEKEAIELR.E | 3            | RRBP1_HUMAN          |
| Q9P2E9               | 2             | 4.2921           | R.SILAETEGMLR.D         | 8            | RRBP1_HUMAN          |
| Q9P2E9               | 1             | 2.5975           | R.ESEELQK.R             | 2            | RRBP1_HUMAN          |
| Q9P2E9               | 2             | 3.8959           | R.TAGPLESSETEEASQLK.E   | 2            | RRBP1_HUMAN          |
| Q9P2E9               | 2             | 4.4505           | R.TAGPLESSETEEASQLKER.L | 2            | RRBP1_HUMAN          |
| Q9P2E9               | 1             | 2.6854           | R.LIEILSEK.A            | 2            | RRBP1_HUMAN          |
| Q9P2E9               | 3             | 5.0563           | R.LKELESQVSGLEK.E       | 7            | RRBP1_HUMAN          |
| Q9P2E9               | 2             | 5.0065           | R.DALNQATSQVESK.Q       | 5            | RRBP1_HUMAN          |
| Q9P2E9               | 2             | 4.252            | R.EHVKEVQQLQGK.I        | 3            | RRBP1_HUMAN          |

***RING and PHD-finger domain-containing protein KIAA1542 - Homo sapiens (Human)***

|        |   |        |                     |   |             |
|--------|---|--------|---------------------|---|-------------|
| Q9P1Y6 | 2 | 2.9653 | R.EGAWDMEDVAPTGVR.Q | 1 | K1542_HUMAN |
|--------|---|--------|---------------------|---|-------------|

***RING finger protein 113A - Homo sapiens (Human)***

|        |   |        |                     |   |             |
|--------|---|--------|---------------------|---|-------------|
| O15541 | 2 | 2.7195 | R.DAQAIFER.S        | 1 | R113A_HUMAN |
| O15541 | 2 | 3.0008 | K.DTSM#GNASSGMVR.K  | 2 | R113A_HUMAN |
| O15541 | 2 | 3.6883 | K.DTSM#GNASSGM#VR.K | 1 | R113A_HUMAN |
| O15541 | 2 | 2.7288 | R.VTHNPMIQK.T       | 1 | R113A_HUMAN |
| O15541 | 2 | 3.5207 | K.DTSMGNASSGMVR.K   | 1 | R113A_HUMAN |

***RING finger protein 214 - Homo sapiens (Human)***

|        |   |        |                     |   |             |
|--------|---|--------|---------------------|---|-------------|
| Q8ND24 | 2 | 3.319  | K.AQMTNILQQIK.T     | 2 | RN214_HUMAN |
| Q8ND24 | 2 | 4.0301 | K.TADSEVNTDQDIEK.N  | 2 | RN214_HUMAN |
| Q8ND24 | 2 | 4.2592 | R.VDQDDDDQDSSSLK.L  | 4 | RN214_HUMAN |
| Q8ND24 | 2 | 3.4868 | K.SDEGLPDGLSTK.D    | 3 | RN214_HUMAN |
| Q8ND24 | 2 | 3.7156 | K.NSPLLSVSSQTITK.E  | 2 | RN214_HUMAN |
| Q8ND24 | 2 | 4.3903 | K.DVASTAGEEGDTSR.E  | 3 | RN214_HUMAN |
| Q8ND24 | 3 | 3.7693 | K.LEEAEKEAELHLYLK.S | 1 | RN214_HUMAN |

***RING finger protein C14orf4 - Homo sapiens (Human)***

|        |   |        |                          |   |             |
|--------|---|--------|--------------------------|---|-------------|
| Q9H1B7 | 3 | 4.8015 | R.YGLSAAAAAAAAAAAAVEQR.S | 2 | CN004_HUMAN |
| Q9H1B7 | 2 | 3.3907 | K.DGSSVHSTTASAR.R        | 4 | CN004_HUMAN |

***RNA binding protein - Homo sapiens (Human)***

|        |   |        |                                |   |              |
|--------|---|--------|--------------------------------|---|--------------|
| Q53GL6 | 4 | 5.3886 | K.KGDGGGASGGGGGGGGSGGGGSGGGGGG | 1 | Q53GL6_HUMAN |
| Q53GL6 | 3 | 6.8505 | K.GDGGGASGGGGGGGGSGGGGSGGGGGG  | 1 | Q53GL6_HUMAN |

***RNA methyltransferase-like protein 1 - Homo sapiens (Human)***

| <i>Accession No*</i>                                                                | <i>Charge</i> | <i>XC(Max)**</i> | <i>Peptide*</i>           | <i>TC***</i> | <i>Reference No*</i> |
|-------------------------------------------------------------------------------------|---------------|------------------|---------------------------|--------------|----------------------|
| Q53GN1                                                                              | 2             | 3.2846           | R.KAPSEASAEQQR.E          | 2            | Q53GN1_HUMAN         |
| <b><i>RNA polymerase II-associated protein 1 - Homo sapiens (Human)</i></b>         |               |                  |                           |              |                      |
| Q9BWH6                                                                              | 3             | 6.2588           | K.GLRDQEAQEQAQTIHEENIAR.L | 2            | RPAP1_HUMAN          |
| <b><i>RNA polymerase-associated protein LEO1 - Homo sapiens (Human)</i></b>         |               |                  |                           |              |                      |
| Q8WVC0                                                                              | 3             | 3.9964           | K.KLTSDEEGEPSGKR.K        | 1            | LEO1_HUMAN           |
| Q8WVC0                                                                              | 3             | 3.7984           | K.APLQGDHNLHFLIR.Q        | 1            | LEO1_HUMAN           |
| Q8WVC0                                                                              | 2             | 2.9801           | K.LPNFLSVEPR.P            | 1            | LEO1_HUMAN           |
| Q8WVC0                                                                              | 2             | 3.6361           | K.LTSDEEGEPSGK.R          | 3            | LEO1_HUMAN           |
| Q8WVC0                                                                              | 2             | 3.4362           | K.VNTDLGNDLYFVK.L         | 3            | LEO1_HUMAN           |
| Q8WVC0                                                                              | 2             | 4.1775           | R.DEEGNEIKESNAR.I         | 1            | LEO1_HUMAN           |
| <b><i>RNA polymerase-associated protein RTF1 homolog - Homo sapiens (Human)</i></b> |               |                  |                           |              |                      |
| Q92541                                                                              | 2             | 3.8112           | K.SASDLSSEDLFK.V          | 3            | RTF1_HUMAN           |
| Q92541                                                                              | 2             | 3.467            | K.SQAMEELKAER.E           | 2            | RTF1_HUMAN           |
| Q92541                                                                              | 2             | 3.0412           | K.ALVAESHNMK.N            | 1            | RTF1_HUMAN           |
| Q92541                                                                              | 3             | 3.7538           | K.AM#AEDLGQDKAK.Q         | 1            | RTF1_HUMAN           |
| Q92541                                                                              | 2             | 3.0758           | K.IDLQVPSESSEK.A          | 2            | RTF1_HUMAN           |
| Q92541                                                                              | 2             | 3.255            | K.NISAIYINQR.N            | 1            | RTF1_HUMAN           |
| <b><i>RNA U small nuclear RNA export adapter protein - Homo sapiens (Human)</i></b> |               |                  |                           |              |                      |
| Q9H814                                                                              | 2             | 4.1276           | R.TPGGVFLNLLK.N           | 4            | RNUXA_HUMAN          |
| <b><i>RNA-binding protein 14 - Homo sapiens (Human)</i></b>                         |               |                  |                           |              |                      |
| Q96PK6                                                                              | 2             | 3.6119           | R.LSESQLSFR.R             | 3            | RBM14_HUMAN          |
| <b><i>RNA-binding protein 26 - Homo sapiens (Human)</i></b>                         |               |                  |                           |              |                      |
| Q5T8P6                                                                              | 3             | 5.4014           | K.TRAEAEAAAVHGAR.F        | 3            | RBM26_HUMAN          |
| <b><i>RNA-binding protein 28 - Homo sapiens (Human)</i></b>                         |               |                  |                           |              |                      |
| Q9NW13                                                                              | 2             | 3.3846           | K.DTQSVSAIGEEK.S          | 1            | RBM28_HUMAN          |
| <b><i>RNA-binding protein 8A - Homo sapiens (Human)</i></b>                         |               |                  |                           |              |                      |
| Q9Y5S9                                                                              | 2             | 3.3156           | K.GYTLVEYETYK.E           | 2            | RBM8A_HUMAN          |
| Q9Y5S9                                                                              | 2             | 3.3586           | K.GRGFGSEEGSR.A           | 4            | RBM8A_HUMAN          |
| Q9Y5S9                                                                              | 3             | 4.651            | R.M#REDYDSVEQDGDDEPGPQR.S | 3            | RBM8A_HUMAN          |
| Q9Y5S9                                                                              | 2             | 2.9388           | R.GFGSEEGSR.A             | 1            | RBM8A_HUMAN          |
| Q9Y5S9                                                                              | 3             | 4.9838           | R.MREDYDSVEQDGDDEPGPQR.S  | 7            | RBM8A_HUMAN          |
| <b><i>RNA-binding protein Musashi homolog 2 - Homo sapiens (Human)</i></b>          |               |                  |                           |              |                      |
| Q96DH6                                                                              | 2             | 4.4677           | R.GFGFVTFADPASVDK.V       | 2            | MSI2H_HUMAN          |

| <i>Accession No*</i>                                                               | <i>Charge</i> | <i>XC(Max)**</i> | <i>Peptide*</i>                   | <i>TC***</i> | <i>Reference No*</i> |
|------------------------------------------------------------------------------------|---------------|------------------|-----------------------------------|--------------|----------------------|
| <b><i>RNA-binding protein with multiple splicing - Homo sapiens (Human)</i></b>    |               |                  |                                   |              |                      |
| Q93062                                                                             | 3             | 4.5928           | K.NALNGIRFDPEIPQTLR.L             | 2            | RBPMS_HUMAN          |
| Q93062                                                                             | 2             | 3.535            | K.ENTPSEANLQEEEV.R.T              | 3            | RBPMS_HUMAN          |
| Q93062                                                                             | 2             | 5.2002           | K.AEKENTPSEANLQEEEV.R.T           | 4            | RBPMS_HUMAN          |
| <b><i>RNA-binding protein with serine-rich domain 1 - Homo sapiens (Human)</i></b> |               |                  |                                   |              |                      |
| Q15287                                                                             | 2             | 3.5138           | K.GYAYVEFENPDEAEK.A               | 3            | RNPS1_HUMAN          |
| <b><i>RPL14 protein - Homo sapiens (Human)</i></b>                                 |               |                  |                                   |              |                      |
| Q6IPH7                                                                             | 2             | 5.6875           | K.GTAAAAAAAAAAAAAAAAAK.V          | 4            | Q6IPH7_HUMAN         |
| <b><i>RRP15-like protein - Homo sapiens (Human)</i></b>                            |               |                  |                                   |              |                      |
| Q9Y3B9                                                                             | 2             | 3.9504           | R.GMDGSTNETASSR.K                 | 4            | RRP15_HUMAN          |
| Q9Y3B9                                                                             | 2             | 3.091            | R.GM#DGSTNETASSR.K                | 1            | RRP15_HUMAN          |
| Q9Y3B9                                                                             | 2             | 3.5889           | R.GVVQLFNAVQK.H                   | 1            | RRP15_HUMAN          |
| Q9Y3B9                                                                             | 2             | 3.4184           | K.SEEGPGWTLR.D                    | 1            | RRP15_HUMAN          |
| Q9Y3B9                                                                             | 2             | 2.9819           | R.VSEENLKK.T                      | 1            | RRP15_HUMAN          |
| <b><i>RRP1-like protein - Homo sapiens (Human)</i></b>                             |               |                  |                                   |              |                      |
| P56182                                                                             | 2             | 4.6308           | R.AEAGEQPGTAER.A                  | 5            | RRP1_HUMAN           |
| <b><i>RRP1-like protein B - Homo sapiens (Human)</i></b>                           |               |                  |                                   |              |                      |
| Q14684                                                                             | 2             | 3.1991           | K.TPTSSPASSPLVAK.K                | 2            | RRP1B_HUMAN          |
| <b><i>RUN and FYVE domain-containing protein 1 - Homo sapiens (Human)</i></b>      |               |                  |                                   |              |                      |
| Q96T51                                                                             | 2             | 4.9509           | R.AAEGWSAPILTLAR.R                | 4            | RUFY1_HUMAN          |
| Q96T51                                                                             | 3             | 5.9815           | R.GRELEPELEPGPGPSALEPGEEFEIVDR.S  | 1            | RUFY1_HUMAN          |
| <b><i>RUN domain-containing protein 2A - Homo sapiens (Human)</i></b>              |               |                  |                                   |              |                      |
| Q9HA26                                                                             | 2             | 4.3524           | K.TPGAGESSEDNSDR.S                | 8            | RUN2A_HUMAN          |
| Q9HA26                                                                             | 2             | 3.2162           | K.KTPGAGESSEDNSDR.S               | 1            | RUN2A_HUMAN          |
| <b><i>RWD domain-containing protein 1 - Homo sapiens (Human)</i></b>               |               |                  |                                   |              |                      |
| Q9H446                                                                             | 2             | 3.5991           | K.AKFDAELLEIK.K                   | 3            | RWDD1_HUMAN          |
| Q9H446                                                                             | 3             | 3.9363           | K.FDAELLEIKK.K                    | 2            | RWDD1_HUMAN          |
| <b><i>S1 RNA-binding domain-containing protein 1 - Homo sapiens (Human)</i></b>    |               |                  |                                   |              |                      |
| Q8N5C6                                                                             | 3             | 4.311            | K.KEENDDFTFGQSALKK.I              | 2            | SRBD1_HUMAN          |
| <b><i>SAM and SH3 domain-containing protein 1 - Homo sapiens (Human)</i></b>       |               |                  |                                   |              |                      |
| O94885                                                                             | 3             | 3.9848           | R.SHSLDDLQVEPGAQDVPTEVTEPPPQIVPEV | 1            | SASH1_HUMAN          |

| <i>Accession No*</i>                                                                                         | <i>Charge</i> | <i>XC(Max)**</i> | <i>Peptide*</i>                | <i>TC***</i> | <i>Reference No*</i> |
|--------------------------------------------------------------------------------------------------------------|---------------|------------------|--------------------------------|--------------|----------------------|
| <b><i>SAP30-binding protein - Homo sapiens (Human)</i></b>                                                   |               |                  |                                |              |                      |
| Q9UHR5                                                                                                       | 2             | 5.3134           | K.GGLVSDAYGEDDFSR.L            | 7            | S30BP_HUMAN          |
| Q9UHR5                                                                                                       | 3             | 4.1516           | K.DMFDPHGWSEDSYYEALAK.A        | 1            | S30BP_HUMAN          |
| Q9UHR5                                                                                                       | 1             | 2.3011           | R.NPSIYEK.L                    | 2            | S30BP_HUMAN          |
| <b><i>SAPK substrate protein 1 - Homo sapiens (Human)</i></b>                                                |               |                  |                                |              |                      |
| Q04323                                                                                                       | 2             | 2.7436           | R.QGQELSAAR.Q                  | 1            | SAKS1_HUMAN          |
| Q04323                                                                                                       | 2             | 3.9871           | R.RQGQELSAAR.Q                 | 6            | SAKS1_HUMAN          |
| Q04323                                                                                                       | 2             | 2.8412           | R.QRLQEDEM.R                   | 1            | SAKS1_HUMAN          |
| Q04323                                                                                                       | 2             | 4.1827           | R.GEELGGGQDPVQLLSGFPR.R        | 2            | SAKS1_HUMAN          |
| Q04323                                                                                                       | 2             | 3.3815           | R.AREQLAAVR.L                  | 3            | SAKS1_HUMAN          |
| Q04323                                                                                                       | 3             | 6.4395           | R.LYVELHRGEELGGGQDPVQLLSGFPR.R | 1            | SAKS1_HUMAN          |
| Q04323                                                                                                       | 1             | 3.3292           | R.MLELVAQK.Q                   | 5            | SAKS1_HUMAN          |
| <b><i>SAPS domain family member 3 - Homo sapiens (Human)</i></b>                                             |               |                  |                                |              |                      |
| Q5H9R7                                                                                                       | 2             | 3.5947           | K.ETGWASFSEFTSSLSTK.D          | 1            | SAPS3_HUMAN          |
| Q5H9R7                                                                                                       | 2             | 2.7863           | K.FADQDDIGNVDFR.V              | 1            | SAPS3_HUMAN          |
| Q5H9R7                                                                                                       | 1             | 2.1086           | K.TETAVFK.S                    | 1            | SAPS3_HUMAN          |
| <b><i>SAPSI protein - Homo sapiens (Human)</i></b>                                                           |               |                  |                                |              |                      |
| Q2M2H3                                                                                                       | 2             | 3.3495           | R.SQDPTPPSAPQEATEGSK.V         | 2            | Q2M2H3_HUMAN         |
| <b><i>Sarcolemmal membrane-associated protein - Homo sapiens (Human)</i></b>                                 |               |                  |                                |              |                      |
| Q14BN4                                                                                                       | 2             | 2.8678           | K.SSDTTDAQMDEQDLNEPLAK.V       | 1            | SLMAP_HUMAN          |
| <b><i>Sarcoplasmic reticulum histidine-rich calcium-binding protein precursor - Homo sapiens (Human)</i></b> |               |                  |                                |              |                      |
| P23327                                                                                                       | 4             | 5.4159           | R.SQDHKVGDGVSVEEVFAEHGGQAR.G   | 1            | SRCH_HUMAN           |
| P23327                                                                                                       | 3             | 4.6737           | K.VGDEGVSGEEVFAEHGGQAR.G       | 2            | SRCH_HUMAN           |
| <b><i>Scaffold attachment factor B2 - Homo sapiens (Human)</i></b>                                           |               |                  |                                |              |                      |
| Q14151                                                                                                       | 2             | 4.1927           | R.NLWVSGLSSTTR.A               | 4            | SAFB2_HUMAN          |
| Q14151                                                                                                       | 3             | 5.9981           | K.AVKEEGQDPDEIGIELEATSK.K      | 2            | SAFB2_HUMAN          |
| Q14151                                                                                                       | 2             | 4.1255           | K.NTLETSSLNFK.V                | 1            | SAFB2_HUMAN          |
| <b><i>Scavenger receptor cysteine-rich type 1 protein M130 precursor - Homo sapiens (Human)</i></b>          |               |                  |                                |              |                      |
| Q86VB7                                                                                                       | 2             | 3.0732           | K.EAEFGQGTGPIWLNEVK.C          | 2            | C163A_HUMAN          |
| <b><i>SEC16 homolog A - Homo sapiens (Human)</i></b>                                                         |               |                  |                                |              |                      |
| O15027                                                                                                       | 3             | 5.001            | K.NEHRPASALVNPLAR.G            | 1            | SC16A_HUMAN          |
| O15027                                                                                                       | 2             | 3.0037           | R.GGIGASENLENPPK.M             | 3            | SC16A_HUMAN          |
| O15027                                                                                                       | 1             | 2.4848           | R.FYQQVTK.D                    | 2            | SC16A_HUMAN          |

| <i>Accession No*</i> | <i>Charge</i> | <i>XC(Max)**</i> | <i>Peptide*</i>                     | <i>TC***</i> | <i>Reference No*</i> |
|----------------------|---------------|------------------|-------------------------------------|--------------|----------------------|
| O15027               | 2             | 3.6842           | K.DAQQQPGLER.A                      | 4            | SC16A_HUMAN          |
| O15027               | 2             | 3.2167           | R.YGPLPGPAVPR.H                     | 2            | SC16A_HUMAN          |
| O15027               | 2             | 3.5423           | R.NPSSAAPVQSR.G                     | 4            | SC16A_HUMAN          |
| O15027               | 3             | 6.363            | R.LSGSARPQELVGTFIQQEVGKPEDEASGSFFK. | 2            | SC16A_HUMAN          |
| O15027               | 3             | 5.1693           | R.PQELVGTFIQQEVGKPEDEASGSFFK.Q      | 1            | SC16A_HUMAN          |

***Secretagoin - Homo sapiens (Human)***

|        |   |        |                   |   |            |
|--------|---|--------|-------------------|---|------------|
| O76038 | 2 | 2.8114 | R.NKDGRLDLNDLAR.I | 1 | SEGN_HUMAN |
|--------|---|--------|-------------------|---|------------|

***Secretogranin-1 precursor - Homo sapiens (Human)***

|        |   |        |                      |   |            |
|--------|---|--------|----------------------|---|------------|
| P05060 | 2 | 3.6157 | R.GEAGAPGEEDIQGPTK.A | 2 | SCG1_HUMAN |
|--------|---|--------|----------------------|---|------------|

***Secretory carrier membrane protein 3 - Homo sapiens (Human)***

|        |   |        |                    |   |              |
|--------|---|--------|--------------------|---|--------------|
| Q4VX17 | 2 | 4.6707 | R.QYATLDVYNPFETR.E | 4 | Q4VX17_HUMAN |
|--------|---|--------|--------------------|---|--------------|

***Secretory carrier-associated membrane protein 2 - Homo sapiens (Human)***

|        |   |        |             |   |             |
|--------|---|--------|-------------|---|-------------|
| O15127 | 2 | 2.7632 | R.KAAELER.K | 1 | SCAM2_HUMAN |
|--------|---|--------|-------------|---|-------------|

***Segment polarity protein dishevelled homolog DVL-2 - Homo sapiens (Human)***

|        |   |        |                     |   |            |
|--------|---|--------|---------------------|---|------------|
| O14641 | 2 | 3.4386 | K.VIYHLDEEETPYLVK.I | 1 | DVL2_HUMAN |
|--------|---|--------|---------------------|---|------------|

***Segment polarity protein dishevelled homolog DVL-3 - Homo sapiens (Human)***

|        |   |        |                     |   |            |
|--------|---|--------|---------------------|---|------------|
| Q92997 | 2 | 3.8084 | K.IIYHLDGQETPYLVK.L | 1 | DVL3_HUMAN |
|--------|---|--------|---------------------|---|------------|

***Selenide, water dikinase 2 - Homo sapiens (Human)***

|        |   |        |                          |   |            |
|--------|---|--------|--------------------------|---|------------|
| Q99611 | 3 | 3.9896 | R.SFSNYRPFEPQALGLSPSWR.L | 1 | SPS2_HUMAN |
|--------|---|--------|--------------------------|---|------------|

***Selenium-binding protein 1 - Homo sapiens (Human)***

|        |   |        |                             |   |            |
|--------|---|--------|-----------------------------|---|------------|
| Q13228 | 2 | 3.4962 | R.VAGGPQMIQLSLDGK.R         | 2 | SBP1_HUMAN |
| Q13228 | 2 | 3.9896 | R.NTGTEAPDYLATVDVDPK.S      | 4 | SBP1_HUMAN |
| Q13228 | 2 | 2.7426 | K.LNPNFLVDFGK.E             | 1 | SBP1_HUMAN |
| Q13228 | 3 | 4.2582 | K.LNPNFLVDFGKEPLGPALAEHLR.Y | 1 | SBP1_HUMAN |
| Q13228 | 2 | 3.2112 | R.LTGQLFLGGSIVK.G           | 1 | SBP1_HUMAN |

***Selenoprotein H - Homo sapiens (Human)***

|        |   |        |                |   |            |
|--------|---|--------|----------------|---|------------|
| Q8IZQ5 | 2 | 4.2188 | R.NAAALSQALR.L | 4 | SELH_HUMAN |
|--------|---|--------|----------------|---|------------|

***Selenoprotein P precursor - Homo sapiens (Human)***

|        |   |        |                    |   |             |
|--------|---|--------|--------------------|---|-------------|
| P49908 | 2 | 3.1911 | K.LPTDSELAPR.S     | 2 | SEPP1_HUMAN |
| P49908 | 2 | 2.9194 | R.HLIFEK.T         | 2 | SEPP1_HUMAN |
| P49908 | 2 | 3.809  | R.DMPASEDLQDLQKK.L | 2 | SEPP1_HUMAN |
| P49908 | 2 | 3.5954 | R.DM#PASEDLQDLQK.K | 6 | SEPP1_HUMAN |



| <i>Accession No*</i>                                                                     | <i>Charge</i> | <i>XC(Max)**</i> | <i>Peptide*</i>                  | <i>TC***</i> | <i>Reference No*</i> |
|------------------------------------------------------------------------------------------|---------------|------------------|----------------------------------|--------------|----------------------|
| P49908                                                                                   | 2             | 3.2208           | R.DMPASEDLQLDLQK.K               | 2            | SEPP1_HUMAN          |
| <b><i>Semaphorin-4D precursor - Homo sapiens (Human)</i></b>                             |               |                  |                                  |              |                      |
| Q92854                                                                                   | 2             | 3.2158           | K.VPTDREDSQR.I                   | 3            | SEM4D_HUMAN          |
| Q92854                                                                                   | 1             | 2.2804           | K.FADSDADGD.-                    | 1            | SEM4D_HUMAN          |
| <b><i>Semaphorin-4G precursor - Homo sapiens (Human)</i></b>                             |               |                  |                                  |              |                      |
| Q9NTN9                                                                                   | 2             | 3.3641           | K.HTQLVEQLDESSV.-                | 2            | SEM4G_HUMAN          |
| <b><i>Sentrin-specific protease 6 - Homo sapiens (Human)</i></b>                         |               |                  |                                  |              |                      |
| Q9GZR1                                                                                   | 2             | 3.8137           | K.SGGSAGEITFLEALAR.S             | 1            | SENP6_HUMAN          |
| <b><i>Septin-11 - Homo sapiens (Human)</i></b>                                           |               |                  |                                  |              |                      |
| Q9NVA2                                                                                   | 2             | 3.994            | K.AAAQLLQSQAQQSGAQQTK.K          | 1            | SEP11_HUMAN          |
| <b><i>Septin-2 - Homo sapiens (Human)</i></b>                                            |               |                  |                                  |              |                      |
| Q15019                                                                                   | 3             | 4.0759           | R.KVENEDMNKDQILLEK.E             | 1            | SEPT2_HUMAN          |
| Q15019                                                                                   | 2             | 2.7704           | R.RMQEMIAR.M                     | 1            | SEPT2_HUMAN          |
| <b><i>Septin-9 - Homo sapiens (Human)</i></b>                                            |               |                  |                                  |              |                      |
| Q9UHD8                                                                                   | 2             | 2.8244           | R.LGDSSGPALKR.S                  | 1            | SEPT9_HUMAN          |
| Q9UHD8                                                                                   | 2             | 4.1387           | R.SFEVEEVETPNSTPPR.R             | 3            | SEPT9_HUMAN          |
| Q9UHD8                                                                                   | 3             | 3.8584           | R.RLGDSSGPALKR.S                 | 2            | SEPT9_HUMAN          |
| <b><i>Sequestosome-1 - Homo sapiens (Human)</i></b>                                      |               |                  |                                  |              |                      |
| Q13501                                                                                   | 2             | 2.836            | R.LTPVSPESSSTEEK.S               | 1            | SQSTM_HUMAN          |
| Q13501                                                                                   | 3             | 6.5789           | R.AGEARPGPTAESASGPOSEDPSVNF.LK.N | 1            | SQSTM_HUMAN          |
| <b><i>Serine arginine-rich pre-mRNA splicing factor SR-A1 - Homo sapiens (Human)</i></b> |               |                  |                                  |              |                      |
| Q7Z5V7                                                                                   | 2             | 4.5744           | K.TPEVSFLPEEATEEAGVR.G           | 3            | Q7Z5V7_HUMAN         |
| Q7Z5V7                                                                                   | 3             | 5.3395           | R.AARPPPAASATPTAQPLPQPPAPR.A     | 2            | Q7Z5V7_HUMAN         |
| Q7Z5V7                                                                                   | 3             | 5.1016           | R.FDIYDPFHPTDEAYSPPPAPEQK.Y      | 3            | Q7Z5V7_HUMAN         |
| <b><i>Serine hydroxymethyltransferase, cytosolic - Homo sapiens (Human)</i></b>          |               |                  |                                  |              |                      |
| P34896                                                                                   | 2             | 2.9868           | K.YSEGYPGQR.Y                    | 2            | GLYC_HUMAN           |
| P34896                                                                                   | 3             | 4.8869           | K.MLAQPLKDSDEVYNIKK.E            | 2            | GLYC_HUMAN           |
| P34896                                                                                   | 2             | 3.0781           | K.DADLWSSHDK.M                   | 1            | GLYC_HUMAN           |
| P34896                                                                                   | 3             | 4.8953           | K.M#LAQPLKDSDEVYNIKK.E           | 2            | GLYC_HUMAN           |
| <b><i>Serine/arginine repetitive matrix protein 2 - Homo sapiens (Human)</i></b>         |               |                  |                                  |              |                      |
| Q9UQ35                                                                                   | 2             | 4.5458           | R.MGQAPSQSLLPPAQDQPR.S           | 2            | SRRM2_HUMAN          |
| Q9UQ35                                                                                   | 2             | 3.8338           | R.TPAAAAAMNLASPR.T               | 3            | SRRM2_HUMAN          |

| <i>Accession No*</i> | <i>Charge</i> | <i>XC(Max)**</i> | <i>Peptide*</i>          | <i>TC***</i> | <i>Reference No*</i> |
|----------------------|---------------|------------------|--------------------------|--------------|----------------------|
| Q9UQ35               | 2             | 2.915            | R.M#APALSGANLTSPR.V      | 1            | SRRM2_HUMAN          |
| Q9UQ35               | 2             | 2.9746           | R.TPTAPAVNLAGAR.T        | 1            | SRRM2_HUMAN          |
| Q9UQ35               | 2             | 3.4353           | K.SSTPPGESYFGVSSLQLK.G   | 2            | SRRM2_HUMAN          |
| Q9UQ35               | 2             | 3.7536           | K.AGMSSNQSISSPVLDVPR.T   | 2            | SRRM2_HUMAN          |
| Q9UQ35               | 3             | 4.6333           | R.FQSDSSSYPTVDSNLLGQSR.L | 4            | SRRM2_HUMAN          |
| Q9UQ35               | 2             | 3.4863           | R.SPGMLEPLGSSR.T         | 2            | SRRM2_HUMAN          |
| Q9UQ35               | 2             | 5.1348           | R.SSGHSSSELSPDAVEK.A     | 2            | SRRM2_HUMAN          |
| Q9UQ35               | 2             | 3.4022           | R.SSTGPEPPAPTPLLAER.H    | 1            | SRRM2_HUMAN          |
| Q9UQ35               | 2             | 3.4301           | R.TAVAPSAVNLDPR.T        | 3            | SRRM2_HUMAN          |
| Q9UQ35               | 2             | 2.791            | R.TSVPENHAQSR.I          | 2            | SRRM2_HUMAN          |
| Q9UQ35               | 2             | 3.4851           | R.TPAIPTAVNLADSR.T       | 3            | SRRM2_HUMAN          |
| Q9UQ35               | 2             | 2.7834           | R.MAPALSGANLTSPR.V       | 2            | SRRM2_HUMAN          |
| Q9UQ35               | 2             | 3.6361           | R.TPQAPASANLVGPR.S       | 3            | SRRM2_HUMAN          |
| Q9UQ35               | 2             | 3.2044           | R.TPAAAAAM#NLASPR.T      | 2            | SRRM2_HUMAN          |
| Q9UQ35               | 2             | 5.2344           | R.IPAASAAAM#NLASAR.T     | 3            | SRRM2_HUMAN          |
| Q9UQ35               | 2             | 3.7093           | R.TPMSVLQQAGGSMMDGPGPR.I | 1            | SRRM2_HUMAN          |
| Q9UQ35               | 2             | 5.5137           | R.IPAASAAAMNLASAR.T      | 4            | SRRM2_HUMAN          |
| Q9UQ35               | 2             | 3.3851           | R.GEFSASPMLK.S           | 1            | SRRM2_HUMAN          |
| Q9UQ35               | 2             | 2.9878           | R.HSLSGSSPGMK.D          | 1            | SRRM2_HUMAN          |
| Q9UQ35               | 1             | 2.1003           | R.VPLSAYER.V             | 1            | SRRM2_HUMAN          |

***Serine/threonine-protein kinase 3 - Homo sapiens (Human)***

|        |   |        |                 |   |            |
|--------|---|--------|-----------------|---|------------|
| Q13188 | 2 | 3.2289 | K.VPQDGDFFDLK.N | 2 | STK3_HUMAN |
| Q13188 | 2 | 3.0199 | K.NLSLEELQM#R.L | 3 | STK3_HUMAN |
| Q13188 | 2 | 3.266  | K.NLSLEELQMR.L  | 4 | STK3_HUMAN |

***Serine/threonine-protein kinase 33 - Homo sapiens (Human)***

|        |   |        |                    |   |             |
|--------|---|--------|--------------------|---|-------------|
| Q9BYT3 | 2 | 3.1076 | K.NNPESVEENTTEEK.N | 2 | STK33_HUMAN |
|--------|---|--------|--------------------|---|-------------|

***Serine/threonine-protein kinase D3 - Homo sapiens (Human)***

|        |   |        |                      |   |             |
|--------|---|--------|----------------------|---|-------------|
| O94806 | 2 | 2.7041 | K.C*LTLFQNESGSKYYK.E | 1 | KPCD3_HUMAN |
|--------|---|--------|----------------------|---|-------------|

***Serine/threonine-protein kinase LMTK2 precursor - Homo sapiens (Human)***

|        |   |        |                                 |   |             |
|--------|---|--------|---------------------------------|---|-------------|
| Q8IWU2 | 2 | 3.5682 | R.TGPELSQLTALR.S                | 3 | LMTK2_HUMAN |
| Q8IWU2 | 3 | 4.3657 | K.IFDLM#ELNGVQADFKPATLSSSLDNPKE | 1 | LMTK2_HUMAN |
| Q8IWU2 | 2 | 4.2205 | R.SQDSPGESEETLR.L               | 2 | LMTK2_HUMAN |
| Q8IWU2 | 2 | 4.9419 | R.GTEVTPETFTAGSQGSYR.D          | 3 | LMTK2_HUMAN |
| Q8IWU2 | 2 | 2.7586 | K.LKEPDIEGK.Y                   | 1 | LMTK2_HUMAN |
| Q8IWU2 | 2 | 4.3188 | K.NLEAVETLNQLNSK.D              | 2 | LMTK2_HUMAN |

| <i>Accession No*</i>                                                           | <i>Charge</i> | <i>XC(Max)**</i> | <i>Peptide*</i>                      | <i>TC***</i> | <i>Reference No*</i> |
|--------------------------------------------------------------------------------|---------------|------------------|--------------------------------------|--------------|----------------------|
| Q8IWU2                                                                         | 3             | 4.5319           | R.FSISPANIASFSLTHLTDSIEQGGSSEDGEKD.- | 1            | LMTK2_HUMAN          |
| <b><i>Serine/threonine-protein kinase MARK1 - Homo sapiens (Human)</i></b>     |               |                  |                                      |              |                      |
| Q9P0L2                                                                         | 3             | 4.1291           | R.VPAASPSAHSISTATPDR.T               | 1            | MARK1_HUMAN          |
| <b><i>Serine/threonine-protein kinase MARK2 - Homo sapiens (Human)</i></b>     |               |                  |                                      |              |                      |
| Q7KZI7                                                                         | 2             | 2.7834           | K.VPASPLPLGLER.K                     | 1            | MARK2_HUMAN          |
| Q7KZI7                                                                         | 3             | 5.4291           | R.VPVASPSAHNISSSGGAPDR.T             | 4            | MARK2_HUMAN          |
| Q7KZI7                                                                         | 3             | 3.7957           | R.DQQNLPYGVTPASPSGHSQGR.R            | 1            | MARK2_HUMAN          |
| <b><i>Serine/threonine-protein kinase MRCK beta - Homo sapiens (Human)</i></b> |               |                  |                                      |              |                      |
| Q9Y5S2                                                                         | 2             | 3.1253           | R.SMSDPDQDFDKEPDSSTK.H               | 2            | MRCKB_HUMAN          |
| Q9Y5S2                                                                         | 3             | 5.3572           | R.NKPYISWPSSGGSEPSVTVPLR.S           | 3            | MRCKB_HUMAN          |
| <b><i>Serine/threonine-protein kinase N2 - Homo sapiens (Human)</i></b>        |               |                  |                                      |              |                      |
| Q16513                                                                         | 3             | 3.7325           | R.IPQLAPPASDSTVTKLDFLEPEPPPAPPR.A    | 1            | PKN2_HUMAN           |
| Q16513                                                                         | 2             | 3.7416           | R.ASSLGEIDESSEL.R.V                  | 2            | PKN2_HUMAN           |
| <b><i>Serine/threonine-protein kinase Nek9 - Homo sapiens (Human)</i></b>      |               |                  |                                      |              |                      |
| Q8TD19                                                                         | 3             | 4.2647           | K.ELENAEFIPM#PDSPSPLSAAFSESEKDTLPYE  | 1            | NEK9_HUMAN           |
| Q8TD19                                                                         | 3             | 4.5913           | K.KLEGGQVGMHSG.G                     | 3            | NEK9_HUMAN           |
| Q8TD19                                                                         | 3             | 4.2316           | K.KLEGGQVGM#HSG.G                    | 1            | NEK9_HUMAN           |
| Q8TD19                                                                         | 2             | 4.3912           | K.LQQENLQIFTQLQK.L                   | 1            | NEK9_HUMAN           |
| <b><i>Serine/threonine-protein kinase OSR1 - Homo sapiens (Human)</i></b>      |               |                  |                                      |              |                      |
| O95747                                                                         | 2             | 4.1737           | K.LASGVEGSDIPDDGK.L                  | 3            | OXSR1_HUMAN          |
| O95747                                                                         | 4             | 4.7346           | R.DTAEGVSQELISAGLVDGRDLVIVAANLQK.I   | 1            | OXSR1_HUMAN          |
| O95747                                                                         | 2             | 2.9646           | K.IVEEPQSNR.S                        | 3            | OXSR1_HUMAN          |
| O95747                                                                         | 2             | 3.8439           | R.DLVIVAANLQK.I                      | 1            | OXSR1_HUMAN          |
| O95747                                                                         | 2             | 3.4981           | R.DTAEGVSQELISAGLVDGR.D              | 1            | OXSR1_HUMAN          |
| O95747                                                                         | 2             | 5.2591           | K.TAQALSSGSGSQETK.I                  | 6            | OXSR1_HUMAN          |
| <b><i>Serine/threonine-protein kinase PAK 1 - Homo sapiens (Human)</i></b>     |               |                  |                                      |              |                      |
| Q13153                                                                         | 2             | 2.7581           | R.NTSTMIGAGSK.D                      | 1            | PAK1_HUMAN           |
| Q13153                                                                         | 2             | 3.9708           | K.SAEDYNSSNALNVK.A                   | 3            | PAK1_HUMAN           |
| Q13153                                                                         | 3             | 4.5969           | K.KNPQAVLDVLEFYNSKK.T                | 1            | PAK1_HUMAN           |
| Q13153                                                                         | 2             | 4.5275           | K.KNPQAVLDVLEFYNSK.K                 | 1            | PAK1_HUMAN           |
| <b><i>Serine/threonine-protein kinase PAK 4 - Homo sapiens (Human)</i></b>     |               |                  |                                      |              |                      |
| O96013                                                                         | 3             | 4.0045           | R.FAGHSEAGGGSGDR.R                   | 1            | PAK4_HUMAN           |
| O96013                                                                         | 2             | 2.7362           | R.QWQSLIEESAR.R                      | 1            | PAK4_HUMAN           |

| <i>Accession No*</i>                                                                                         | <i>Charge</i> | <i>XC(Max)**</i> | <i>Peptide*</i>             | <i>TC***</i> | <i>Reference No*</i> |
|--------------------------------------------------------------------------------------------------------------|---------------|------------------|-----------------------------|--------------|----------------------|
| O96013                                                                                                       | 2             | 5.3143           | R.DKRPLSGPDVGTQPAGLASGAK.L  | 7            | PAK4_HUMAN           |
| O96013                                                                                                       | 2             | 3.4145           | K.DGALTLLLDEFENM#SVTR.S     | 2            | PAK4_HUMAN           |
| O96013                                                                                                       | 2             | 3.0798           | R.ARQENGMPPEEPATTAR.G       | 1            | PAK4_HUMAN           |
| <b><i>Serine/threonine-protein kinase Pim-2 - Homo sapiens (Human)</i></b>                                   |               |                  |                             |              |                      |
| Q9P1W9                                                                                                       | 2             | 2.8372           | R.CFFGQVVAAIQHCHSR.G        | 1            | PIM2_HUMAN           |
| <b><i>Serine/threonine-protein kinase PRP4 homolog - Homo sapiens (Human)</i></b>                            |               |                  |                             |              |                      |
| Q13523                                                                                                       | 3             | 4.3864           | R.TKLDDLALLEDEKQR.A         | 2            | PRP4B_HUMAN          |
| Q13523                                                                                                       | 2             | 3.345            | K.AELDNELMGK.V              | 2            | PRP4B_HUMAN          |
| <b><i>Serine/threonine-protein kinase QSK - Homo sapiens (Human)</i></b>                                     |               |                  |                             |              |                      |
| Q9Y2K2                                                                                                       | 2             | 4.1644           | R.GSPSSYSPSTGVGFSPTQALK.V   | 2            | QSK_HUMAN            |
| <b><i>Serine/threonine-protein kinase WNK1 - Homo sapiens (Human)</i></b>                                    |               |                  |                             |              |                      |
| Q9H4A3                                                                                                       | 2             | 3.773            | K.EGPVLATSSGAGVFK.M         | 3            | WNK1_HUMAN           |
| Q9H4A3                                                                                                       | 2             | 4.1354           | K.LGAAAADAVTGR.T            | 2            | WNK1_HUMAN           |
| Q9H4A3                                                                                                       | 2             | 4.8556           | K.EGPVASPPFMDLEQAVLPAVIPK.K | 6            | WNK1_HUMAN           |
| Q9H4A3                                                                                                       | 2             | 3.048            | K.VPPAVIIPPAAPLSGR.R        | 2            | WNK1_HUMAN           |
| <b><i>Serine/threonine-protein phosphatase 1 regulatory subunit 10 - Homo sapiens (Human)</i></b>            |               |                  |                             |              |                      |
| Q96QC0                                                                                                       | 2             | 3.6605           | R.QSNVAAPGDATPPAEK.K        | 2            | PP1RA_HUMAN          |
| Q96QC0                                                                                                       | 2             | 2.8512           | R.HAFETAR.R                 | 1            | PP1RA_HUMAN          |
| Q96QC0                                                                                                       | 2             | 4.1295           | K.GILQELFLNK.E              | 4            | PP1RA_HUMAN          |
| <b><i>Serine/threonine-protein phosphatase 2A 56 kDa regulatory subunit delta isoform - Homo sapiens</i></b> |               |                  |                             |              |                      |
| Q14738                                                                                                       | 2             | 3.1091           | K.RAEFLTASQEAL.-            | 1            | 2A5D_HUMAN           |
| <b><i>Serine/threonine-protein phosphatase 2B catalytic subunit alpha isoform - Homo sapiens (Human)</i></b> |               |                  |                             |              |                      |
| Q08209                                                                                                       | 2             | 3.8698           | R.DAMPSDANLNSINK.A          | 2            | PP2BA_HUMAN          |
| Q08209                                                                                                       | 2             | 3.6234           | R.DAM#PSDANLNSINK.A         | 4            | PP2BA_HUMAN          |
| <b><i>Serologically defined colon cancer antigen 10 - Homo sapiens (Human)</i></b>                           |               |                  |                             |              |                      |
| Q6UX04                                                                                                       | 2             | 2.7537           | K.VTGDTVYNMLR.L             | 1            | Q6UX04_HUMAN         |
| <b><i>SERPINC1 protein - Homo sapiens (Human)</i></b>                                                        |               |                  |                             |              |                      |
| Q8TCE1                                                                                                       | 2             | 3.416            | K.ATEDEGSEQKIPEATNR.R       | 8            | Q8TCE1_HUMAN         |
| Q8TCE1                                                                                                       | 1             | 2.3527           | K.IPEATNR.R                 | 3            | Q8TCE1_HUMAN         |
| <b><i>Serum amyloid A protein precursor - Homo sapiens (Human)</i></b>                                       |               |                  |                             |              |                      |
| P02735                                                                                                       | 3             | 4.3176           | R.FFGHGAEDSLADQAANEWGR.S    | 2            | SAA_HUMAN            |
| <b><i>Serum amyloid P-component precursor - Homo sapiens (Human)</i></b>                                     |               |                  |                             |              |                      |

| <i>Accession No*</i>                                                                          | <i>Charge</i> | <i>XC(Max)**</i> | <i>Peptide*</i>                      | <i>TC***</i> | <i>Reference No*</i> |
|-----------------------------------------------------------------------------------------------|---------------|------------------|--------------------------------------|--------------|----------------------|
| P02743                                                                                        | 2             | 3.4103           | R.AYSLFSYNTQGR.D                     | 1            | SAMP_HUMAN           |
| <b><i>Serum deprivation-response protein - Homo sapiens (Human)</i></b>                       |               |                  |                                      |              |                      |
| O95810                                                                                        | 2             | 3.9659           | K.VLIFQEENEIPASVFK.Q                 | 1            | SDPR_HUMAN           |
| O95810                                                                                        | 3             | 6.0545           | R.YEGSYALTSEEAEERSDGDVPQPAVLQVHQTS.- | 2            | SDPR_HUMAN           |
| O95810                                                                                        | 2             | 5.3087           | R.DNSQVNAVTVLTLDDK.L                 | 2            | SDPR_HUMAN           |
| O95810                                                                                        | 2             | 4.0402           | R.YEGSYALTSEEAEER.S                  | 2            | SDPR_HUMAN           |
| O95810                                                                                        | 3             | 3.7421           | K.RLENNHAQLLR.R                      | 1            | SDPR_HUMAN           |
| O95810                                                                                        | 2             | 3.6385           | K.YQASTSNTVSK.L                      | 3            | SDPR_HUMAN           |
| <b><i>SET domain-containing protein 3 - Homo sapiens (Human)</i></b>                          |               |                  |                                      |              |                      |
| Q86TU7                                                                                        | 2             | 3.4364           | K.GSSSDSTAGVKE.-                     | 6            | SETD3_HUMAN          |
| Q86TU7                                                                                        | 2             | 4.3937           | R.SENESLNQESK.R                      | 3            | SETD3_HUMAN          |
| Q86TU7                                                                                        | 2             | 3.3917           | R.SENESLNQESKR.A                     | 3            | SETD3_HUMAN          |
| <b><i>Set1/Ash2 histone methyltransferase complex subunit ASH2 - Homo sapiens (Human)</i></b> |               |                  |                                      |              |                      |
| Q9UBL3                                                                                        | 2             | 3.0495           | K.FGLLDQDLSNIGPAYDNQK.Q              | 1            | ASH2L_HUMAN          |
| <b><i>SH2 domain-containing adapter protein B - Homo sapiens (Human)</i></b>                  |               |                  |                                      |              |                      |
| Q15464                                                                                        | 2             | 2.7951           | R.RPATPAEVR.Y                        | 1            | SHB_HUMAN            |
| <b><i>SH3 and multiple ankyrin repeat domains protein 2 - Homo sapiens (Human)</i></b>        |               |                  |                                      |              |                      |
| Q9UPX8                                                                                        | 3             | 5.0227           | K.KSDTPQSPSLNSSQPTNSADSK.K           | 1            | SHAN2_HUMAN          |
| Q9UPX8                                                                                        | 3             | 3.9244           | K.ANWISELNSILQQM#NR.E                | 1            | SHAN2_HUMAN          |
| Q9UPX8                                                                                        | 2             | 3.4573           | R.NSPAFLSTDLGDEDVGLGPPAPR.T          | 2            | SHAN2_HUMAN          |
| Q9UPX8                                                                                        | 2             | 4.1999           | K.NMLIDIMDTSQQK.S                    | 1            | SHAN2_HUMAN          |
| Q9UPX8                                                                                        | 2             | 3.5877           | K.ANWISELNSILQQMNR.E                 | 1            | SHAN2_HUMAN          |
| Q9UPX8                                                                                        | 2             | 4.0496           | R.LLDPSSPLALALSAR.D                  | 1            | SHAN2_HUMAN          |
| <b><i>SH3 and multiple ankyrin repeat domains protein 3 - Homo sapiens (Human)</i></b>        |               |                  |                                      |              |                      |
| Q9BYB0                                                                                        | 2             | 3.5917           | R.AALAVGSPGPGGGSFAR.E                | 1            | SHAN3_HUMAN          |
| Q9BYB0                                                                                        | 2             | 2.8835           | R.GSLASPAFSPR.S                      | 1            | SHAN3_HUMAN          |
| Q9BYB0                                                                                        | 3             | 5.988            | R.GPRPGGLDYGAGDGPGLAFGGPAPK.D        | 2            | SHAN3_HUMAN          |
| <b><i>SH3 and PX domain containing 3 - Homo sapiens (Human)</i></b>                           |               |                  |                                      |              |                      |
| Q8WV41                                                                                        | 2             | 3.7812           | R.GETGLFPASYVEIVR.S                  | 2            | Q8WV41_HUMAN         |
| <b><i>SH3 and PX domain-containing protein 2A - Homo sapiens (Human)</i></b>                  |               |                  |                                      |              |                      |
| Q5TCZ1                                                                                        | 2             | 3.3308           | K.EAEEGPTGASESQDSPR.K                | 2            | SPD2A_HUMAN          |
| <b><i>SH3 domain containing Ysc84-like protein 1. - Homo sapiens (Human)</i></b>              |               |                  |                                      |              |                      |
| Q96HL8                                                                                        | 3             | 3.9406           | K.TDSHFDWWEGK.L                      | 1            | Q96HL8_HUMAN         |

Accession No\* Charge XC(Max)\*\* Peptide\* TC\*\*\* Reference No\*

***SH3 domain GRB2-like protein B1 - Homo sapiens (Human)***

Q9Y371 2 4.5501 K.GKVPITYLELLN.- 8 SHLB1\_HUMAN

***SH3 domain-binding glutamic acid-rich-like protein - Homo sapiens (Human)***

O75368 2 3.1227 K.DIAANEENRK.W 6 SH3L1\_HUMAN  
O75368 3 5.0989 R.ENVPENSRPATGYPLPPQIFNESQYR.G 4 SH3L1\_HUMAN  
O75368 2 2.9306 K.DIAANEENR.K 3 SH3L1\_HUMAN  
O75368 2 5.3295 K.IGFEEKDIAANEENR.K 5 SH3L1\_HUMAN  
O75368 3 5.1615 K.IGFEEKDIAANEENRK.W 9 SH3L1\_HUMAN  
O75368 3 5.0378 K.KKQQDVLGFLEANK.I 3 SH3L1\_HUMAN  
O75368 2 3.2354 R.PATGYPLPPQIFNESQYR.G 1 SH3L1\_HUMAN  
O75368 2 4.6075 R.VYIASSSGSTAIK.K 13 SH3L1\_HUMAN  
O75368 2 4.0339 R.VYIASSSGSTAIKK.K 6 SH3L1\_HUMAN  
O75368 3 5.6615 K.KKQQDVLGFLEANK.I 4 SH3L1\_HUMAN  
O75368 2 3.215 K.QQDVLGFLEANK.I 2 SH3L1\_HUMAN  
O75368 2 3.0367 R.ENNAVYAFLGLTAPPGSK.E 1 SH3L1\_HUMAN  
O75368 2 3.351 R.GDYDAFFEAR.E 2 SH3L1\_HUMAN

***SH3 domain-containing RING finger protein 1 - Homo sapiens (Human)***

Q7Z6J0 2 4.2415 K.DLQSSQGGQQR.V 3 Q7Z6J0\_HUMAN

***SH3-containing GRB2-like protein 1 - Homo sapiens (Human)***

Q99961 2 3.4301 R.QAVQILDELAEK.L 3 SH3G1\_HUMAN  
Q99961 3 3.981 K.VGGAEGTKLDDDFKEM#EK.K 1 SH3G1\_HUMAN  
Q99961 3 4.2714 K.VGGAEGTKLDDDFKEMEK.K 4 SH3G1\_HUMAN  
Q99961 1 2.1471 K.AVTEVLAR.T 1 SH3G1\_HUMAN

***SH3-containing GRB2-like protein 2 - Homo sapiens (Human)***

Q99962 2 3.241 R.ALYDFEPENEGELGFK.E 1 SH3G2\_HUMAN

***Shootin-1 - Homo sapiens (Human)***

A0MZ66 3 4.397 K.KTLEAEFNPSPTPEPGEGPR.K 2 SHOT1\_HUMAN  
A0MZ66 2 3.9972 K.TVLNSEVLEQR.K 2 SHOT1\_HUMAN  
A0MZ66 2 4.1917 K.TLEAEFNPSPTPEPGEGPR.K 2 SHOT1\_HUMAN  
A0MZ66 2 3.3799 K.HSVDELQK.R 7 SHOT1\_HUMAN  
A0MZ66 2 2.89 K.ILAIELNLK.S 1 SHOT1\_HUMAN  
A0MZ66 2 3.8158 K.SMPVLGSVSSVTK.T 2 SHOT1\_HUMAN  
A0MZ66 2 6.136 K.VTAEADSSSPTGILATSESK.S 6 SHOT1\_HUMAN  
A0MZ66 3 5.5668 K.YIDGEKQAEVVVLDPVSTHEPQTK.D 1 SHOT1\_HUMAN

| <i>Accession No*</i>                                                                                         | <i>Charge</i> | <i>XC(Max)**</i> | <i>Peptide*</i>           | <i>TC***</i> | <i>Reference No*</i> |
|--------------------------------------------------------------------------------------------------------------|---------------|------------------|---------------------------|--------------|----------------------|
| A0MZ66                                                                                                       | 3             | 5.2723           | R.KVTAEADSSSPTGILATSESK.S | 3            | SHOT1_HUMAN          |
| A0MZ66                                                                                                       | 2             | 3.587            | K.LTQQLLEER.I             | 2            | SHOT1_HUMAN          |
| A0MZ66                                                                                                       | 3             | 4.6352           | K.VKELEEQLENETLHK.E       | 3            | SHOT1_HUMAN          |
| <b><i>Short/branched chain specific acyl-CoA dehydrogenase, mitochondrial precursor - Homo sapiens (</i></b> |               |                  |                           |              |                      |
| P45954                                                                                                       | 2             | 3.4963           | K.YYASEIAGQTTSK.C         | 1            | ACDSB_HUMAN          |
| P45954                                                                                                       | 3             | 5.5792           | R.LDFDQGLQHVAHVATQLEAAR.L | 2            | ACDSB_HUMAN          |
| <b><i>Sickle tail protein homolog - Homo sapiens (Human)</i></b>                                             |               |                  |                           |              |                      |
| Q5T5P2                                                                                                       | 2             | 3.3545           | K.KQLAALTQAIR.T           | 2            | SKT_HUMAN            |
| Q5T5P2                                                                                                       | 2             | 3.0244           | K.NLEFFHEDVR.K            | 3            | SKT_HUMAN            |
| Q5T5P2                                                                                                       | 2             | 3.2176           | K.QLENTISEMSPK.A          | 2            | SKT_HUMAN            |
| Q5T5P2                                                                                                       | 2             | 4.3048           | R.KSDVEYENGPQMEFQK.V      | 3            | SKT_HUMAN            |
| Q5T5P2                                                                                                       | 2             | 3.9576           | K.GEDIQTVNIDAR.K          | 2            | SKT_HUMAN            |
| Q5T5P2                                                                                                       | 3             | 4.4438           | K.ISGLQYSIPDTENQTLNYGK.T  | 1            | SKT_HUMAN            |
| Q5T5P2                                                                                                       | 2             | 4.0545           | K.KPVIIFDEPMDIR.S         | 2            | SKT_HUMAN            |
| Q5T5P2                                                                                                       | 2             | 2.8871           | R.NPGGQEMNR.T             | 1            | SKT_HUMAN            |
| Q5T5P2                                                                                                       | 2             | 3.6451           | R.NPGGQEMNRTELNK.F        | 1            | SKT_HUMAN            |
| Q5T5P2                                                                                                       | 2             | 2.7277           | K.QLENTISEM#SPK.A         | 1            | SKT_HUMAN            |
| Q5T5P2                                                                                                       | 2             | 3.6603           | R.TLDSLEQTIK.Q            | 1            | SKT_HUMAN            |
| Q5T5P2                                                                                                       | 2             | 5.2138           | R.RQEQPSIESTSPISR.T       | 2            | SKT_HUMAN            |
| Q5T5P2                                                                                                       | 2             | 3.0717           | R.GM#ENSISDASR.T          | 4            | SKT_HUMAN            |
| <b><i>Sideroflexin-1 - Homo sapiens (Human)</i></b>                                                          |               |                  |                           |              |                      |
| Q9H9B4                                                                                                       | 2             | 3.5839           | R.NILLTNEQLESAR.K         | 1            | SFXN1_HUMAN          |
| <b><i>Sideroflexin-2 - Homo sapiens (Human)</i></b>                                                          |               |                  |                           |              |                      |
| Q96NB2                                                                                                       | 2             | 4.2342           | K.YGELEPYVYFNK.G          | 4            | SFXN2_HUMAN          |
| <b><i>Signal recognition particle 14 kDa protein - Homo sapiens (Human)</i></b>                              |               |                  |                           |              |                      |
| P37108                                                                                                       | 2             | 2.8818           | K.KISTVVSSK.E             | 1            | SRP14_HUMAN          |
| P37108                                                                                                       | 2             | 3.837            | K.KGTVEGFEPADNK.C         | 2            | SRP14_HUMAN          |
| P37108                                                                                                       | 2             | 3.0305           | K.GTVEGFEPADNK.C          | 1            | SRP14_HUMAN          |
| P37108                                                                                                       | 2             | 2.8633           | K.FQMAYSNLLR.A            | 1            | SRP14_HUMAN          |
| <b><i>Signal recognition particle 19 kDa protein - Homo sapiens (Human)</i></b>                              |               |                  |                           |              |                      |
| P09132                                                                                                       | 2             | 4.1561           | K.TGGADQSLQQGEGSK.K       | 2            | SRP19_HUMAN          |
| <b><i>Signal recognition particle receptor subunit alpha - Homo sapiens (Human)</i></b>                      |               |                  |                           |              |                      |
| P08240                                                                                                       | 3             | 4.3758           | K.KEGSDGPLATSKPVAEK.S     | 1            | SRPR_HUMAN           |

| <i>Accession No*</i>                                                                               | <i>Charge</i> | <i>XC(Max)**</i> | <i>Peptide*</i>            | <i>TC***</i> | <i>Reference No*</i> |
|----------------------------------------------------------------------------------------------------|---------------|------------------|----------------------------|--------------|----------------------|
| <b><i>Signal recognition particle receptor subunit beta - Homo sapiens (Human)</i></b>             |               |                  |                            |              |                      |
| Q9Y5M8                                                                                             | 2             | 3.2987           | R.SAAPSTLDSSSTAPAQLGK.K    | 1            | SRPRB_HUMAN          |
| <b><i>Signal transducer and activator of transcription 1-alpha/beta - Homo sapiens (Human)</i></b> |               |                  |                            |              |                      |
| P42224                                                                                             | 2             | 2.8496           | K.ELSAVTFPDIIR.N           | 1            | STAT1_HUMAN          |
| <b><i>Signal transducer and activator of transcription 4 - Homo sapiens (Human)</i></b>            |               |                  |                            |              |                      |
| Q14765                                                                                             | 2             | 2.7328           | K.SFTFWTWLEAILDLIK.K       | 1            | STAT4_HUMAN          |
| <b><i>Signal transducing adapter molecule 1 - Homo sapiens (Human)</i></b>                         |               |                  |                            |              |                      |
| Q92783                                                                                             | 3             | 4.1743           | K.NLKEQGVTFPAIGSQAAEQAK.A  | 1            | STAM1_HUMAN          |
| Q92783                                                                                             | 2             | 3.5856           | K.DPGTVANKKEEEDLAK.A       | 2            | STAM1_HUMAN          |
| Q92783                                                                                             | 2             | 4.0221           | K.LMNEDPMYSMYAK.L          | 3            | STAM1_HUMAN          |
| Q92783                                                                                             | 2             | 3.8332           | R.DFASEVSNVLNK.G           | 2            | STAM1_HUMAN          |
| <b><i>Signal transducing adapter molecule 2 - Homo sapiens (Human)</i></b>                         |               |                  |                            |              |                      |
| O75886                                                                                             | 2             | 3.1308           | K.SLYPSSEIQLNNK.V          | 1            | STAM2_HUMAN          |
| O75886                                                                                             | 2             | 3.0669           | K.NKEDEDIAK.A              | 2            | STAM2_HUMAN          |
| O75886                                                                                             | 2             | 2.7722           | K.LVNEAPVYSVYSK.L          | 1            | STAM2_HUMAN          |
| <b><i>Signal-induced proliferation-associated 1-like protein 1 - Homo sapiens (Human)</i></b>      |               |                  |                            |              |                      |
| O43166                                                                                             | 3             | 3.8949           | K.VAPLWHSSSEVISMADR.T      | 1            | SI1L1_HUMAN          |
| O43166                                                                                             | 2             | 2.7782           | R.SISSDGRPLER.R            | 1            | SI1L1_HUMAN          |
| O43166                                                                                             | 2             | 2.8897           | R.QNTQSDIGGSGK.S           | 2            | SI1L1_HUMAN          |
| O43166                                                                                             | 2             | 3.6676           | R.LQEESQNASDK.L            | 4            | SI1L1_HUMAN          |
| O43166                                                                                             | 2             | 3.204            | K.QGTSGESFFDLLK.G          | 1            | SI1L1_HUMAN          |
| O43166                                                                                             | 3             | 4.3753           | R.HQSDGNEIAHTR.L           | 1            | SI1L1_HUMAN          |
| O43166                                                                                             | 2             | 3.493            | R.TLETESHGLDR.K            | 2            | SI1L1_HUMAN          |
| <b><i>Signal-induced proliferation-associated 1-like protein 3 - Homo sapiens (Human)</i></b>      |               |                  |                            |              |                      |
| O60292                                                                                             | 2             | 3.2838           | K.VVLQSEVASLR.Q            | 2            | SI1L3_HUMAN          |
| O60292                                                                                             | 2             | 2.9751           | R.EVSPAPAVAGQSK.G          | 1            | SI1L3_HUMAN          |
| <b><i>Signal-induced proliferation-associated protein 1 - Homo sapiens (Human)</i></b>             |               |                  |                            |              |                      |
| Q96FS4                                                                                             | 2             | 4.331            | R.RLQAESESAAATR.L          | 2            | SIPA1_HUMAN          |
| Q96FS4                                                                                             | 2             | 3.1392           | K.SDAEPEPGNLSEK.V          | 2            | SIPA1_HUMAN          |
| <b><i>Similar to CG14903-PA - Homo sapiens (Human)</i></b>                                         |               |                  |                            |              |                      |
| Q6GMV3                                                                                             | 3             | 4.9747           | R.KVVLEAPDETTLKELAETLQQK.N | 1            | Q6GMV3_HUMAN         |
| Q6GMV3                                                                                             | 3             | 5.7119           | R.DHPHTAAYLQELGR.M         | 2            | Q6GMV3_HUMAN         |



| <i>Accession No*</i>                                                                              | <i>Charge</i> | <i>XC(Max)**</i> | <i>Peptide*</i>                   | <i>TC***</i> | <i>Reference No*</i> |
|---------------------------------------------------------------------------------------------------|---------------|------------------|-----------------------------------|--------------|----------------------|
| <b><i>Similar to mKIAA0038 protein - Homo sapiens (Human)</i></b>                                 |               |                  |                                   |              |                      |
| A4D198                                                                                            | 2             | 4.0527           | R.GFRDDFLGGR.G                    | 4            | A4D198_HUMAN         |
| <b><i>Single Ig IL-1-related receptor - Homo sapiens (Human)</i></b>                              |               |                  |                                   |              |                      |
| Q6IA17                                                                                            | 3             | 4.3412           | R.GPVFGEPSAPPHTSGVSLGESR.S        | 1            | SIGIR_HUMAN          |
| Q6IA17                                                                                            | 2             | 4.0275           | R.ALDSEVDPDPEGLDGV.R              | 4            | SIGIR_HUMAN          |
| <b><i>Single-stranded DNA-binding protein, mitochondrial precursor - Homo sapiens (Human)</i></b> |               |                  |                                   |              |                      |
| Q04837                                                                                            | 2             | 4.8644           | K.NPVTIFSLATNEMWR.S               | 2            | SSB_HUMAN            |
| Q04837                                                                                            | 2             | 3.9961           | R.QATTIADNIIFLSDQTK.E             | 2            | SSB_HUMAN            |
| <b><i>Sister chromatid cohesion protein PDS5 homolog A - Homo sapiens (Human)</i></b>             |               |                  |                                   |              |                      |
| Q29RF7                                                                                            | 2             | 5.2121           | K.NKEINSDQATQGNISDR.G             | 3            | PDS5A_HUMAN          |
| Q29RF7                                                                                            | 3             | 4.4974           | K.TDEKVDESPPAPSKPR.R              | 4            | PDS5A_HUMAN          |
| Q29RF7                                                                                            | 2             | 4.0865           | R.AAVGQESPGGLEAGNAK.A             | 1            | PDS5A_HUMAN          |
| Q29RF7                                                                                            | 2             | 3.9              | R.EQSSEAAETGVSENEENPVR.I          | 3            | PDS5A_HUMAN          |
| Q29RF7                                                                                            | 3             | 5.656            | R.SREQSSEAAETGVSENEENPVR.I        | 2            | PDS5A_HUMAN          |
| Q29RF7                                                                                            | 2             | 4.6781           | R.STGTETGSNINVNSELNPSTGNR.S       | 2            | PDS5A_HUMAN          |
| <b><i>Sjogren syndrome/scleroderma autoantigen 1 - Homo sapiens (Human)</i></b>                   |               |                  |                                   |              |                      |
| O60232                                                                                            | 2             | 3.1323           | R.LMGDYLLR.G                      | 3            | SSA27_HUMAN          |
| O60232                                                                                            | 3             | 5.3044           | K.IYCVACQELSDVDKDNPALNAQAALSQAR.E | 2            | SSA27_HUMAN          |
| <b><i>SLAIN motif family member 2 - Homo sapiens (Human)</i></b>                                  |               |                  |                                   |              |                      |
| Q9P270                                                                                            | 2             | 2.9987           | R.AGASIPSSGAASPR.G                | 1            | Q9P270_HUMAN         |
| Q9P270                                                                                            | 2             | 2.8016           | R.KLQELVK.K                       | 2            | Q9P270_HUMAN         |
| Q9P270                                                                                            | 2             | 2.941            | R.LSGWEEEEESWLYSSPK.K             | 1            | Q9P270_HUMAN         |
| Q9P270                                                                                            | 2             | 5.4459           | R.SGAVQGAGSLPGSPVR.A              | 4            | Q9P270_HUMAN         |
| Q9P270                                                                                            | 2             | 4.2855           | K.LNDVTDVQILAR.M                  | 3            | Q9P270_HUMAN         |
| <b><i>SLIT-ROBO Rho GTPase-activating protein 1 - Homo sapiens (Human)</i></b>                    |               |                  |                                   |              |                      |
| Q7Z6B7                                                                                            | 2             | 4.4553           | K.HAPDVVLDLTLEQVK.N               | 1            | SRGP1_HUMAN          |
| <b><i>SLIT-ROBO Rho GTPase-activating protein 2 - Homo sapiens (Human)</i></b>                    |               |                  |                                   |              |                      |
| O75044                                                                                            | 2             | 4.1254           | K.TNATSPGVNSSTSPQSTDK.S           | 5            | FNBP2_HUMAN          |
| <b><i>Small acidic protein - Homo sapiens (Human)</i></b>                                         |               |                  |                                   |              |                      |
| O00193                                                                                            | 2             | 3.19             | K.KINEELESQYQQSMDSK.L             | 1            | SMAP_HUMAN           |
| O00193                                                                                            | 3             | 4.9736           | K.KINEELESQYQQSM#DSK.L            | 1            | SMAP_HUMAN           |
| O00193                                                                                            | 2             | 5.2692           | R.SASPDDDLGSNWEAADLGNEER.K        | 6            | SMAP_HUMAN           |
| O00193                                                                                            | 3             | 5.604            | R.TGEEDKKINEELESQYQQSM#DSK.L      | 5            | SMAP_HUMAN           |

| <i>Accession No*</i>                                                                                    | <i>Charge</i> | <i>XC(Max)**</i> | <i>Peptide*</i>                | <i>TC***</i> | <i>Reference No*</i> |
|---------------------------------------------------------------------------------------------------------|---------------|------------------|--------------------------------|--------------|----------------------|
| O00193                                                                                                  | 3             | 6.0517           | R.TGEEDKKINEELESQYQQSMDSK.L    | 6            | SMAP_HUMAN           |
| O00193                                                                                                  | 2             | 3.8479           | K.INEELESQYQQSMDSK.L           | 2            | SMAP_HUMAN           |
| <b><i>Small EDRK-rich factor 2 - Homo sapiens (Human)</i></b>                                           |               |                  |                                |              |                      |
| P84101                                                                                                  | 2             | 2.9696           | K.QRDSEIMQQK.Q                 | 1            | SERF2_HUMAN          |
| P84101                                                                                                  | 2             | 3.858            | R.DDGLSAAAR.K                  | 8            | SERF2_HUMAN          |
| P84101                                                                                                  | 2             | 3.4166           | R.DSEIM#QQK.Q                  | 20           | SERF2_HUMAN          |
| P84101                                                                                                  | 1             | 3.3722           | R.DSEIMQQK.Q                   | 8            | SERF2_HUMAN          |
| <b><i>Small glutamine-rich tetratricopeptide repeat-containing protein A - Homo sapiens (Human)</i></b> |               |                  |                                |              |                      |
| O43765                                                                                                  | 2             | 3.5313           | R.MGLALSSLNK.H                 | 2            | SGTA_HUMAN           |
| O43765                                                                                                  | 2             | 3.0348           | K.ALELDPDNETYK.S               | 2            | SGTA_HUMAN           |
| O43765                                                                                                  | 2             | 4.0105           | R.SRTPSASNDDQQE.-              | 2            | SGTA_HUMAN           |
| O43765                                                                                                  | 2             | 3.5167           | R.TPPSEEDSAEAER.L              | 3            | SGTA_HUMAN           |
| <b><i>Small nuclear ribonucleoprotein F - Homo sapiens (Human)</i></b>                                  |               |                  |                                |              |                      |
| P62306                                                                                                  | 2             | 3.5316           | R.GVEEEEEDGEM#RE.-             | 2            | RUXF_HUMAN           |
| P62306                                                                                                  | 2             | 3.4405           | R.GVEEEEEDGEMRE.-              | 3            | RUXF_HUMAN           |
| <b><i>Small ubiquitin-related modifier 2 precursor - Homo sapiens (Human)</i></b>                       |               |                  |                                |              |                      |
| P61956                                                                                                  | 2             | 3.5562           | K.EGVKTENNDHINLK.V             | 1            | SUMO2_HUMAN          |
| P61956                                                                                                  | 2             | 3.4535           | K.TENNDHINLK.V                 | 4            | SUMO2_HUMAN          |
| <b><i>Small ubiquitin-related modifier 3 precursor - Homo sapiens (Human)</i></b>                       |               |                  |                                |              |                      |
| P55854                                                                                                  | 2             | 3.5991           | K.EGVKTENDHINLK.V              | 1            | SUMO3_HUMAN          |
| <b><i>SMEK homolog 1 - Homo sapiens (Human)</i></b>                                                     |               |                  |                                |              |                      |
| Q6IN85                                                                                                  | 2             | 3.6981           | K.NTSQTAAITTK.G                | 5            | SMEK1_HUMAN          |
| Q6IN85                                                                                                  | 2             | 3.5883           | K.NDDDIMDPISK.F                | 1            | SMEK1_HUMAN          |
| <b><i>Smoothelin-like 2 - Homo sapiens (Human)</i></b>                                                  |               |                  |                                |              |                      |
| Q2TAL5                                                                                                  | 3             | 3.8468           | R.GQSLDHDEASESEM#R.K           | 1            | Q2TAL5_HUMAN         |
| Q2TAL5                                                                                                  | 3             | 3.8152           | R.GQSLDHDEASESEM#R.K           | 1            | Q2TAL5_HUMAN         |
| Q2TAL5                                                                                                  | 3             | 3.8562           | R.GQSLDHDEASESEM#R.K           | 1            | Q2TAL5_HUMAN         |
| <b><i>SNARE-associated protein Snapin - Homo sapiens (Human)</i></b>                                    |               |                  |                                |              |                      |
| O95295                                                                                                  | 3             | 3.98             | R.DLFAEGLLEFLRPAVQQLDSHVHAVR.E | 1            | S25BP_HUMAN          |
| <b><i>SNF-related serine/threonine-protein kinase - Homo sapiens (Human)</i></b>                        |               |                  |                                |              |                      |
| Q9NRH2                                                                                                  | 2             | 2.7349           | R.DSSEGPPGSEGDGGGQSK.P         | 1            | SNRK_HUMAN           |
| <b><i>SNW domain-containing protein 1 - Homo sapiens (Human)</i></b>                                    |               |                  |                                |              |                      |

| <i>Accession No*</i>                                                                                | <i>Charge</i> | <i>XC(Max)**</i> | <i>Peptide*</i>                    | <i>TC***</i> | <i>Reference No*</i> |
|-----------------------------------------------------------------------------------------------------|---------------|------------------|------------------------------------|--------------|----------------------|
| Q13573                                                                                              | 2             | 2.7452           | R.YTPSQQGVAFNSGAK.Q                | 1            | SNW1_HUMAN           |
| <b><i>Sodium- and chloride-dependent GABA transporter 3 - Homo sapiens (Human)</i></b>              |               |                  |                                    |              |                      |
| P48066                                                                                              | 2             | 3.0228           | R.FYDNIEDMIGYRPPSLIK.W             | 1            | S6A11_HUMAN          |
| <b><i>Sodium/hydrogen exchanger 3 - Homo sapiens (Human)</i></b>                                    |               |                  |                                    |              |                      |
| P48764                                                                                              | 2             | 3.8731           | K.LPMESPAQNFTIK.E                  | 2            | SL9A3_HUMAN          |
| P48764                                                                                              | 2             | 3.8601           | R.LPPWLSPGETVVPSSQR.A              | 3            | SL9A3_HUMAN          |
| <b><i>Sodium/potassium-transporting ATPase subunit alpha-1 precursor - Homo sapiens (Human)</i></b> |               |                  |                                    |              |                      |
| P05023                                                                                              | 2             | 2.9023           | K.IVEIPFNSTNK.Y                    | 2            | AT1A1_HUMAN          |
| P05023                                                                                              | 2             | 3.8829           | K.NPNTSEPPHLLVMK.G                 | 2            | AT1A1_HUMAN          |
| P05023                                                                                              | 2             | 3.7804           | K.TSATWLALSR.I                     | 2            | AT1A1_HUMAN          |
| P05023                                                                                              | 2             | 2.8292           | K.DM#TSEQLDDILK.Y                  | 1            | AT1A1_HUMAN          |
| P05023                                                                                              | 2             | 4.2931           | R.AVFQANQENLPILK.R                 | 4            | AT1A1_HUMAN          |
| P05023                                                                                              | 2             | 4.4289           | R.DKYEPAAVSEQGDKK.G                | 4            | AT1A1_HUMAN          |
| P05023                                                                                              | 2             | 4.5076           | R.SPDFTNENPLETR.N                  | 3            | AT1A1_HUMAN          |
| P05023                                                                                              | 2             | 3.751            | R.AVAGDASESALLK.C                  | 2            | AT1A1_HUMAN          |
| P05023                                                                                              | 2             | 3.2858           | K.DMTSEQLDDILK.Y                   | 3            | AT1A1_HUMAN          |
| <b><i>Sodium/potassium-transporting ATPase subunit beta-1 - Homo sapiens (Human)</i></b>            |               |                  |                                    |              |                      |
| P05026                                                                                              | 3             | 4.6301           | K.VGNVEYFGLGNSPGFPLQYYPYGGK.L      | 1            | AT1B1_HUMAN          |
| P05026                                                                                              | 2             | 4.2351           | K.SYEAYVLNIVR.F                    | 3            | AT1B1_HUMAN          |
| P05026                                                                                              | 2             | 2.8677           | R.VAPPGLTQIPQIQK.T                 | 1            | AT1B1_HUMAN          |
| P05026                                                                                              | 2             | 3.379            | K.AYGENIGYSEK.D                    | 2            | AT1B1_HUMAN          |
| P05026                                                                                              | 2             | 3.7838           | K.AYGENIGYSEKDR.F                  | 2            | AT1B1_HUMAN          |
| P05026                                                                                              | 3             | 6.0199           | R.DEDKDKVGNVEYFGLGNSPGFPLQYYPYGGK. | 1            | AT1B1_HUMAN          |
| <b><i>Sodium-dependent neutral amino acid transporter B(0) - Homo sapiens (Human)</i></b>           |               |                  |                                    |              |                      |
| Q695T7                                                                                              | 2             | 2.9306           | R.SSPVDYFWYR.E                     | 1            | S6A19_HUMAN          |
| Q695T7                                                                                              | 2             | 2.751            | R.LVLPNPGLDAR.I                    | 2            | S6A19_HUMAN          |
| Q695T7                                                                                              | 2             | 3.295            | R.IPSLAELETIEQEEASSR.P             | 1            | S6A19_HUMAN          |
| <b><i>Sodium-dependent serotonin transporter - Homo sapiens (Human)</i></b>                         |               |                  |                                    |              |                      |
| P31645                                                                                              | 2             | 3.1813           | R.GATLPGAWRGVLFYLK.P               | 2            | SC6A4_HUMAN          |
| <b><i>Solute carrier family 12 member 2 - Homo sapiens (Human)</i></b>                              |               |                  |                                    |              |                      |
| P55011                                                                                              | 2             | 4.0191           | R.VELPGTAVPSVPEDAAPASR.D           | 2            | S12A2_HUMAN          |
| P55011                                                                                              | 2             | 4.2876           | R.AAAAAAAAAAAAAAAAAAGAGAGAK.Q      | 3            | S12A2_HUMAN          |
| <b><i>Solute carrier family 17 member 7 - Homo sapiens (Human)</i></b>                              |               |                  |                                    |              |                      |

| <i>Accession No*</i>                                                                                   | <i>Charge</i> | <i>XC(Max)**</i> | <i>Peptide*</i>                  | <i>TC***</i> | <i>Reference No*</i> |
|--------------------------------------------------------------------------------------------------------|---------------|------------------|----------------------------------|--------------|----------------------|
| Q6PCD0                                                                                                 | 2             | 2.73             | R.RFFTSM#PVYAIIVANFC*R.S         | 1            | Q6PCD0_HUMAN         |
| <b><i>Solute carrier family 2, facilitated glucose transporter member 5 - Homo sapiens (Human)</i></b> |               |                  |                                  |              |                      |
| P22732                                                                                                 | 2             | 2.9809           | K.TFIEINQIFTK.M                  | 1            | GTR5_HUMAN           |
| <b><i>Solute carrier family 22 member 8 - Homo sapiens (Human)</i></b>                                 |               |                  |                                  |              |                      |
| Q8TCC7                                                                                                 | 2             | 3.4758           | R.IPLQPHGPGLGSS.-                | 1            | OAT3_HUMAN           |
| <b><i>Solute carrier family 23 member 1 - Homo sapiens (Human)</i></b>                                 |               |                  |                                  |              |                      |
| Q9UHI7                                                                                                 | 3             | 4.5887           | R.TQHETTRDPSTPLPTEPK.F           | 4            | S23A1_HUMAN          |
| Q9UHI7                                                                                                 | 2             | 3.1372           | K.SYDFPIGMGIVK.R                 | 2            | S23A1_HUMAN          |
| <b><i>Solute carrier family 25 member 46 - Homo sapiens (Human)</i></b>                                |               |                  |                                  |              |                      |
| Q96AG3                                                                                                 | 2             | 3.4442           | R.DEQGFGGAFPAR.S                 | 2            | S2546_HUMAN          |
| <b><i>Solute carrier family 36 member 2 - Homo sapiens (Human)</i></b>                                 |               |                  |                                  |              |                      |
| Q495M3                                                                                                 | 2             | 3.9604           | K.GNMGTGILGLPLAVK.N              | 1            | Q495M3_HUMAN         |
| Q495M3                                                                                                 | 2             | 3.69             | K.LDLMSPPESAK.K                  | 2            | Q495M3_HUMAN         |
| <b><i>Solute carrier family 5 member 12 - Homo sapiens (Human)</i></b>                                 |               |                  |                                  |              |                      |
| Q1EHB4                                                                                                 | 2             | 4.08             | K.SYNNMAFETTHF.-                 | 4            | Q1EHB4_HUMAN         |
| Q1EHB4                                                                                                 | 2             | 3.4975           | K.SYNNM#AFETTHF.-                | 3            | Q1EHB4_HUMAN         |
| Q1EHB4                                                                                                 | 2             | 3.156            | R.ESLVHVPGYDPK.D                 | 1            | Q1EHB4_HUMAN         |
| <b><i>Solute carrier organic anion transporter family member 4C1 - Homo sapiens (Human)</i></b>        |               |                  |                                  |              |                      |
| Q6ZQN7                                                                                                 | 2             | 4.6396           | K.GIENLAFVPSSPDILR.R             | 3            | Q6ZQN7_HUMAN         |
| <b><i>SON protein - Homo sapiens (Human)</i></b>                                                       |               |                  |                                  |              |                      |
| P18583                                                                                                 | 3             | 4.3708           | R.LPEQPVDVPSEIADSSMTRPQELPELPK.T | 1            | SON_HUMAN            |
| P18583                                                                                                 | 2             | 3.5713           | K.SVESTSPEPSK.I                  | 1            | SON_HUMAN            |
| <b><i>Sorting nexin-12 - Homo sapiens (Human)</i></b>                                                  |               |                  |                                  |              |                      |
| Q9UMY4                                                                                                 | 2             | 2.9788           | K.IAGHPLAQNER.C                  | 2            | SNX12_HUMAN          |
| Q9UMY4                                                                                                 | 2             | 4.4044           | R.RQGLEQFINK.I                   | 4            | SNX12_HUMAN          |
| Q9UMY4                                                                                                 | 2             | 3.4275           | R.GDEGIFEEESFIEER.R              | 1            | SNX12_HUMAN          |
| <b><i>Sorting nexin-17 - Homo sapiens (Human)</i></b>                                                  |               |                  |                                  |              |                      |
| Q15036                                                                                                 | 2             | 4.1335           | K.SPPLLESPDATR.E                 | 4            | SNX17_HUMAN          |
| <b><i>Sorting nexin-19 - Homo sapiens (Human)</i></b>                                                  |               |                  |                                  |              |                      |
| Q92543                                                                                                 | 2             | 2.8076           | R.FIPLATC*PPC*PEAER.Q            | 1            | SNX19_HUMAN          |
| <b><i>Sorting nexin-2 - Homo sapiens (Human)</i></b>                                                   |               |                  |                                  |              |                      |

| <i>Accession No*</i>                                                                           | <i>Charge</i> | <i>XC(Max)**</i> | <i>Peptide*</i>                    | <i>TC***</i> | <i>Reference No*</i> |
|------------------------------------------------------------------------------------------------|---------------|------------------|------------------------------------|--------------|----------------------|
| O60749                                                                                         | 2             | 4.7935           | K.VGKEDSSSTEFVEK.R                 | 6            | SNX2_HUMAN           |
| O60749                                                                                         | 2             | 2.9871           | K.SMSAPVIFDR.S                     | 2            | SNX2_HUMAN           |
| O60749                                                                                         | 2             | 3.5734           | K.VGDGMNAYMAYR.V                   | 2            | SNX2_HUMAN           |
| O60749                                                                                         | 2             | 2.8449           | K.SM#SAPVIFDR.S                    | 1            | SNX2_HUMAN           |
| O60749                                                                                         | 2             | 4.1054           | R.AVNTQALSGAGILR.M                 | 2            | SNX2_HUMAN           |
| O60749                                                                                         | 3             | 4.2735           | R.TVKHPTLLQDPDLR.Q                 | 2            | SNX2_HUMAN           |
| O60749                                                                                         | 2             | 2.822            | R.QFLESSELPR.A                     | 2            | SNX2_HUMAN           |
| <b><i>Sorting nexin-3 - Homo sapiens (Human)</i></b>                                           |               |                  |                                    |              |                      |
| O60493                                                                                         | 3             | 3.9507           | R.QLPFRGDDGIFDDNFIEER.K            | 2            | SNX3_HUMAN           |
| O60493                                                                                         | 3             | 4.1686           | R.KQGLEQFINK.V                     | 11           | SNX3_HUMAN           |
| <b><i>Sorting nexin-30 - Homo sapiens (Human)</i></b>                                          |               |                  |                                    |              |                      |
| Q5VWJ9                                                                                         | 3             | 3.8872           | R.DMPHPLAGSSSEEAVGGDSTPSPDLLM#AR.S | 1            | SNX30_HUMAN          |
| <b><i>Sorting nexin-4 - Homo sapiens (Human)</i></b>                                           |               |                  |                                    |              |                      |
| O95219                                                                                         | 2             | 2.7457           | R.QLQPAPLEPLGSPDAGLGAAVGK.E        | 1            | SNX4_HUMAN           |
| O95219                                                                                         | 2             | 3.2255           | K.VLEEQINEGEQQLK.S                 | 1            | SNX4_HUMAN           |
| <b><i>Sorting nexin-9 - Homo sapiens (Human)</i></b>                                           |               |                  |                                    |              |                      |
| Q9Y5X1                                                                                         | 2             | 4.6783           | K.SGNWESSEGWGAQPEGAGAQR.N          | 6            | SNX9_HUMAN           |
| <b><i>SPARC-like protein 1 precursor - Homo sapiens (Human)</i></b>                            |               |                  |                                    |              |                      |
| Q14515                                                                                         | 4             | 6.2855           | R.DQGNQEQDPNISNGEEEEKEPGEVGTNDN    | 3            | SPRL1_HUMAN          |
| Q14515                                                                                         | 3             | 4.0772           | K.M#QEDEFDQGNQEEDNSNAEM#EEENASNV   | 1            | SPRL1_HUMAN          |
| <b><i>SPARC-related modular calcium-binding protein 1 precursor - Homo sapiens (Human)</i></b> |               |                  |                                    |              |                      |
| Q9H4F8                                                                                         | 2             | 3.2302           | R.QSALEEAQQNPR.E                   | 1            | SMOC1_HUMAN          |
| <b><i>Spartin - Homo sapiens (Human)</i></b>                                                   |               |                  |                                    |              |                      |
| Q8N0X7                                                                                         | 3             | 4.4743           | R.ERIQPEEKVEVSPAVTK.G              | 2            | SPG20_HUMAN          |
| Q8N0X7                                                                                         | 3             | 5.2053           | K.TATQTGHTLLEDYQIVDNSQR.E          | 3            | SPG20_HUMAN          |
| Q8N0X7                                                                                         | 2             | 3.3336           | R.IQPEEKVEVSPAVTK.G                | 1            | SPG20_HUMAN          |
| Q8N0X7                                                                                         | 2             | 3.3851           | K.GLATSLQNDLQEVPK.L                | 3            | SPG20_HUMAN          |
| Q8N0X7                                                                                         | 2             | 2.7015           | K.AFLFVNK.G                        | 1            | SPG20_HUMAN          |
| Q8N0X7                                                                                         | 2             | 2.937            | R.ENQEGAANVNV.R.G                  | 1            | SPG20_HUMAN          |
| Q8N0X7                                                                                         | 3             | 5.7592           | K.KTATQTGHTLLEDYQIVDNSQR.E         | 2            | SPG20_HUMAN          |
| <b><i>Spectrin alpha chain, brain - Homo sapiens (Human)</i></b>                               |               |                  |                                    |              |                      |
| Q13813                                                                                         | 3             | 3.8449           | K.KLSDNTIGKEEIQQR.L                | 1            | SPTA2_HUMAN          |
| Q13813                                                                                         | 3             | 4.742            | K.HALLEADVAAHQDR.I                 | 1            | SPTA2_HUMAN          |

| <i>Accession No*</i> | <i>Charge</i> | <i>XC(Max)**</i> | <i>Peptide*</i>              | <i>TC***</i> | <i>Reference No*</i> |
|----------------------|---------------|------------------|------------------------------|--------------|----------------------|
| Q13813               | 3             | 3.898            | K.HEALMSDLSAYGSSIQALR.E      | 1            | SPTA2_HUMAN          |
| Q13813               | 3             | 3.7661           | K.HQAFEAEELHANADR.I          | 1            | SPTA2_HUMAN          |
| Q13813               | 2             | 4.5373           | K.HQAFEAEELSANQSR.I          | 1            | SPTA2_HUMAN          |
| Q13813               | 3             | 4.6146           | K.HQALQAEIAGHEPR.I           | 2            | SPTA2_HUMAN          |
| Q13813               | 2             | 3.1286           | K.ITALDEFATK.L               | 1            | SPTA2_HUMAN          |
| Q13813               | 1             | 2.7318           | K.KFDDFQK.D                  | 4            | SPTA2_HUMAN          |
| Q13813               | 2             | 5.1046           | K.LREANQQQQFNR.N             | 7            | SPTA2_HUMAN          |
| Q13813               | 2             | 5.212            | K.KGDILTLLNSTNK.D            | 1            | SPTA2_HUMAN          |
| Q13813               | 2             | 3.3749           | R.DLASVQALLR.K               | 1            | SPTA2_HUMAN          |
| Q13813               | 2             | 4.0646           | K.GRELPTAFDYVEFTR.S          | 1            | SPTA2_HUMAN          |
| Q13813               | 2             | 3.0807           | K.KLDPAQSASR.E               | 1            | SPTA2_HUMAN          |
| Q13813               | 2             | 3.1793           | R.AQLADSFHLQQFFR.D           | 1            | SPTA2_HUMAN          |
| Q13813               | 2             | 4.1971           | K.LFGAAEVQR.F                | 5            | SPTA2_HUMAN          |
| Q13813               | 2             | 3.4178           | K.LGDSDHLQR.F                | 3            | SPTA2_HUMAN          |
| Q13813               | 2             | 4.2459           | K.LGESQTLQQFSR.D             | 2            | SPTA2_HUMAN          |
| Q13813               | 3             | 4.0196           | K.LHELNQKWEALK.A             | 2            | SPTA2_HUMAN          |
| Q13813               | 3             | 4.2288           | K.KHEALM#SDLSAYGSSIQALR.E    | 2            | SPTA2_HUMAN          |
| Q13813               | 4             | 5.5976           | K.KFEFQTDMAAHEERVNEVNQFAAK.L | 2            | SPTA2_HUMAN          |
| Q13813               | 3             | 4.3509           | R.MQHNLEQQIQAR.N             | 5            | SPTA2_HUMAN          |
| Q13813               | 2             | 3.6548           | R.DLAALEDKVK.A               | 9            | SPTA2_HUMAN          |
| Q13813               | 2             | 5.3402           | R.LIQSHPEAEDLQEK.C           | 5            | SPTA2_HUMAN          |
| Q13813               | 4             | 5.0895           | K.KHQALQAEIAGHEPR.I          | 2            | SPTA2_HUMAN          |
| Q13813               | 2             | 4.0896           | K.LQTASDESYKDPTNIQSK.H       | 3            | SPTA2_HUMAN          |
| Q13813               | 2             | 5.4773           | K.ALINADELASDVAGAEALLDR.H    | 4            | SPTA2_HUMAN          |
| Q13813               | 2             | 5.4202           | K.GNAMVEEGHFAAEDVK.A         | 3            | SPTA2_HUMAN          |
| Q13813               | 2             | 3.7478           | K.LSDDNITIGKEEIQQR.L         | 2            | SPTA2_HUMAN          |
| Q13813               | 3             | 4.492            | K.M#KTATDEAYKDPSNLQGK.V      | 2            | SPTA2_HUMAN          |
| Q13813               | 2             | 3.3367           | R.LMVHTVATFNSIK.E            | 2            | SPTA2_HUMAN          |
| Q13813               | 4             | 5.0135           | K.MKTATDEAYKDPSNLQGK.V       | 1            | SPTA2_HUMAN          |
| Q13813               | 3             | 4.2775           | K.KIEDLGAAMEEALILDNK.Y       | 1            | SPTA2_HUMAN          |
| Q13813               | 3             | 5.1196           | K.NQALNTDNYGHDLASVQALQR.K    | 4            | SPTA2_HUMAN          |
| Q13813               | 2             | 3.0557           | K.QVEELYHSLLELGEK.R          | 1            | SPTA2_HUMAN          |
| Q13813               | 2             | 4.2061           | K.REELITNWEQIR.T             | 1            | SPTA2_HUMAN          |
| Q13813               | 3             | 4.3826           | K.SADESGQALLAAGHYASDEV.R     | 4            | SPTA2_HUMAN          |
| Q13813               | 4             | 5.2032           | K.RLEAELAAHEPAIQGVLDTGKK.L   | 2            | SPTA2_HUMAN          |
| Q13813               | 3             | 4.1902           | K.KGDILTLLNSTNKDWWK.V        | 2            | SPTA2_HUMAN          |
| Q13813               | 3             | 5.063            | K.SLSAQEEKITALDEFATK.L       | 1            | SPTA2_HUMAN          |

| <i>Accession No*</i> | <i>Charge</i> | <i>XC(Max)**</i> | <i>Peptide*</i>                | <i>TC***</i> | <i>Reference No*</i> |
|----------------------|---------------|------------------|--------------------------------|--------------|----------------------|
| Q13813               | 2             | 4.4913           | K.LIQEQHPPEELIK.T              | 6            | SPTA2_HUMAN          |
| Q13813               | 1             | 2.17             | K.VEVNDR.Q                     | 2            | SPTA2_HUMAN          |
| Q13813               | 2             | 3.817            | K.VLETAEDIQER.R                | 6            | SPTA2_HUMAN          |
| Q13813               | 2             | 3.0491           | K.VNSLGETAER.L                 | 2            | SPTA2_HUMAN          |
| Q13813               | 2             | 2.7433           | R.AALLELWELRR.Q                | 1            | SPTA2_HUMAN          |
| Q13813               | 3             | 4.3852           | R.AGTFQAFEQFGQQLLAHGHYASPEIK.Q | 1            | SPTA2_HUMAN          |
| Q13813               | 3             | 6.1504           | R.ALSSEGKPYVTKEELYQNLTR.E      | 2            | SPTA2_HUMAN          |
| Q13813               | 3             | 4.4012           | R.DADETKEWIEEK.N               | 4            | SPTA2_HUMAN          |
| Q13813               | 2             | 4.8005           | K.TATDEAYKDPSNLQGK.V           | 4            | SPTA2_HUMAN          |
| Q13813               | 3             | 5.3583           | K.RLEAELAHAHEPAIQGVLDTGK.K     | 2            | SPTA2_HUMAN          |
| Q13813               | 2             | 4.9077           | R.EAFLNTEDKGDSDLDSVEALIK.K     | 2            | SPTA2_HUMAN          |
| Q13813               | 2             | 3.9525           | R.DVEDEETWIR.E                 | 8            | SPTA2_HUMAN          |
| Q13813               | 3             | 3.9445           | R.DVEDEETWIREKEPIAASTNR.G      | 1            | SPTA2_HUMAN          |
| Q13813               | 2             | 5.2117           | R.LAALADQWQFLVQK.S             | 2            | SPTA2_HUMAN          |
| Q13813               | 2             | 3.4442           | R.EANELQQWINEK.E               | 1            | SPTA2_HUMAN          |
| Q13813               | 2             | 4.9646           | R.DLAALGDKVNSLGETAER.L         | 5            | SPTA2_HUMAN          |
| Q13813               | 2             | 3.7417           | R.EKEPIVGSTDYGKDEDSAEALLK.K    | 1            | SPTA2_HUMAN          |
| Q13813               | 2             | 3.1187           | R.ELPTAFDYVEFTR.S              | 3            | SPTA2_HUMAN          |
| Q13813               | 2             | 4.8521           | R.ENLLEEQGSIALR.Q              | 4            | SPTA2_HUMAN          |
| Q13813               | 2             | 3.4041           | R.FLADFRDLTSSWVTEMK.A          | 1            | SPTA2_HUMAN          |
| Q13813               | 2             | 3.6035           | R.DVDETISWIK.E                 | 2            | SPTA2_HUMAN          |
| Q13813               | 3             | 3.8476           | R.GLVSSDELAKDVTGAEALLER.H      | 1            | SPTA2_HUMAN          |
| Q13813               | 3             | 4.6391           | R.ENLLEEQGSIALRQEIQIDNQTR.I    | 2            | SPTA2_HUMAN          |
| Q13813               | 2             | 4.2246           | K.GDILTLLNSTNKDWWK.V           | 1            | SPTA2_HUMAN          |
| Q13813               | 2             | 3.3324           | K.DVTGAEALLER.H                | 1            | SPTA2_HUMAN          |
| Q13813               | 2             | 3.0707           | K.EELYQNLTR.E                  | 1            | SPTA2_HUMAN          |
| Q13813               | 2             | 3.3276           | K.DLIGVQNLLK.K                 | 3            | SPTA2_HUMAN          |
| Q13813               | 2             | 5.3849           | K.EAALTSEEVGADLEQVEVLQK.K      | 7            | SPTA2_HUMAN          |
| Q13813               | 2             | 3.2239           | K.EKEQLMASDDFGR.D              | 2            | SPTA2_HUMAN          |
| Q13813               | 2             | 4.5722           | K.GNAM#VEEGHFAAEDVK.A          | 6            | SPTA2_HUMAN          |
| Q13813               | 2             | 4.59             | K.LIDVNHYAKDEVAAR.M            | 2            | SPTA2_HUMAN          |
| Q13813               | 1             | 2.2787           | R.LQQLFR.D                     | 2            | SPTA2_HUMAN          |
| Q13813               | 2             | 3.5526           | K.DLTNVQNLQK.K                 | 2            | SPTA2_HUMAN          |
| Q13813               | 2             | 4.8592           | R.GKDLIGVQNLLK.K               | 7            | SPTA2_HUMAN          |
| Q13813               | 2             | 2.8118           | R.M#NEVISLWK.K                 | 1            | SPTA2_HUMAN          |
| Q13813               | 3             | 5.3969           | R.LQQLFRDVEDEETWIR.E           | 4            | SPTA2_HUMAN          |
| Q13813               | 3             | 4.0948           | R.LQQSHPLSATQIQVK.R            | 3            | SPTA2_HUMAN          |

| <i>Accession No*</i> | <i>Charge</i> | <i>XC(Max)**</i> | <i>Peptide*</i>               | <i>TC***</i> | <i>Reference No*</i> |
|----------------------|---------------|------------------|-------------------------------|--------------|----------------------|
| Q13813               | 3             | 4.247            | R.FNRDVDETIWIK.E              | 7            | SPTA2_HUMAN          |
| Q13813               | 3             | 4.558            | R.M#KQVEELYHSLLELGEK.R        | 1            | SPTA2_HUMAN          |
| Q13813               | 2             | 3.2357           | R.DTEQVDNWMSK.Q               | 2            | SPTA2_HUMAN          |
| Q13813               | 3             | 4.5305           | R.M#QHNLEQQIQAR.N             | 3            | SPTA2_HUMAN          |
| Q13813               | 2             | 4.2803           | R.KVEDLFLTFK.K                | 1            | SPTA2_HUMAN          |
| Q13813               | 2             | 3.4558           | R.MNEVISLWK.K                 | 4            | SPTA2_HUMAN          |
| Q13813               | 2             | 3.9699           | R.GVIDMGNSLIER.G              | 1            | SPTA2_HUMAN          |
| Q13813               | 2             | 2.8152           | R.QEQIDNQTR.I                 | 2            | SPTA2_HUMAN          |
| Q13813               | 2             | 3.1896           | R.QFQDAGHFDAENIK.K            | 2            | SPTA2_HUMAN          |
| Q13813               | 3             | 4.3068           | R.RQDLEDLQAQQYFADANEAESWM#R.E | 1            | SPTA2_HUMAN          |
| Q13813               | 1             | 2.523            | K.LHELNQK.W                   | 2            | SPTA2_HUMAN          |
| Q13813               | 2             | 3.1711           | R.DSDELKSWVNEK.M              | 1            | SPTA2_HUMAN          |
| Q13813               | 2             | 3.9024           | R.DLTSWVTEMK.A                | 3            | SPTA2_HUMAN          |
| Q13813               | 2             | 3.6203           | R.SLQQLAEER.S                 | 4            | SPTA2_HUMAN          |
| Q13813               | 2             | 3.1335           | R.DLTSWVTEM#K.A               | 2            | SPTA2_HUMAN          |
| Q13813               | 2             | 2.9974           | R.EELITNWEQIR.T               | 2            | SPTA2_HUMAN          |
| Q13813               | 3             | 5.0465           | R.MKQVEELYHSLLELGEK.R         | 2            | SPTA2_HUMAN          |
| Q13813               | 2             | 3.9434           | R.YEALKEPMVAR.K               | 4            | SPTA2_HUMAN          |
| Q13813               | 2             | 3.1386           | R.YEALKEPM#VAR.K              | 1            | SPTA2_HUMAN          |
| Q13813               | 2             | 3.2425           | R.VNEVNFQAAK.L                | 2            | SPTA2_HUMAN          |
| Q13813               | 2             | 4.2126           | R.SQLLGSAAHEVQR.F             | 4            | SPTA2_HUMAN          |

***Spectrin beta chain, brain 1 - Homo sapiens (Human)***

|        |   |        |                         |   |             |
|--------|---|--------|-------------------------|---|-------------|
| Q01082 | 2 | 3.079  | R.DTGNIGQER.V           | 1 | SPTB2_HUMAN |
| Q01082 | 2 | 3.6906 | R.SQNIVTDSSSLSAEAIK.Q   | 2 | SPTB2_HUMAN |
| Q01082 | 2 | 2.8093 | R.LVDTGDKFR.F           | 1 | SPTB2_HUMAN |
| Q01082 | 3 | 4.2925 | R.MHTTFEHDIQALGTQVR.Q   | 1 | SPTB2_HUMAN |
| Q01082 | 2 | 2.7153 | R.MAETVDTSEMVGATEQR.T   | 1 | SPTB2_HUMAN |
| Q01082 | 3 | 6.2469 | R.DASVAEAWLLGQEPYLSSR.E | 4 | SPTB2_HUMAN |
| Q01082 | 2 | 2.9443 | R.LVSQDNFGFDLPAVEAATK.K | 1 | SPTB2_HUMAN |
| Q01082 | 2 | 4.2374 | R.TQETPSAQM#EGFLNR.K    | 4 | SPTB2_HUMAN |
| Q01082 | 2 | 3.3362 | R.DLDDFQSWLSR.T         | 1 | SPTB2_HUMAN |
| Q01082 | 2 | 2.7825 | R.QNLLSQSHAYQQFLR.D     | 1 | SPTB2_HUMAN |
| Q01082 | 2 | 3.6818 | R.LTTLELLEVR.R          | 4 | SPTB2_HUMAN |
| Q01082 | 2 | 3.8848 | R.LNDGNEYLFQAK.D        | 2 | SPTB2_HUMAN |
| Q01082 | 2 | 3.0667 | R.LAEISDVWEEMK.T        | 2 | SPTB2_HUMAN |
| Q01082 | 2 | 4.1756 | R.EVDDLEQWIAER.E        | 3 | SPTB2_HUMAN |



| <i>Accession No*</i> | <i>Charge</i> | <i>XC(Max)**</i> | <i>Peptide*</i>            | <i>TC***</i> | <i>Reference No*</i> |
|----------------------|---------------|------------------|----------------------------|--------------|----------------------|
| Q01082               | 2             | 4.4082           | R.DQNTVETLQR.M             | 3            | SPTB2_HUMAN          |
| Q01082               | 2             | 5.8195           | R.KKEIEELQSQAQALSQEGK.S    | 4            | SPTB2_HUMAN          |
| Q01082               | 2             | 3.6584           | R.M#AETVDTSEMVNGATEQR.T    | 1            | SPTB2_HUMAN          |
| Q01082               | 2             | 3.9126           | K.TAASGIPYHSEVPVSLK.E      | 3            | SPTB2_HUMAN          |
| Q01082               | 2             | 4.1529           | R.TQETPSAQMEGFLNR.K        | 3            | SPTB2_HUMAN          |
| Q01082               | 2             | 3.0145           | R.LAEISDVWEEM#K.T          | 1            | SPTB2_HUMAN          |
| Q01082               | 2             | 3.8257           | K.KQQMLENQMEVR.K           | 2            | SPTB2_HUMAN          |
| Q01082               | 2             | 3.8381           | R.TQILAASYELHK.F           | 2            | SPTB2_HUMAN          |
| Q01082               | 2             | 3.4119           | K.MLTAQDM#SYDEAR.N         | 3            | SPTB2_HUMAN          |
| Q01082               | 2             | 5.2209           | R.AQTLPTSVVTITSESSPGKR.E   | 3            | SPTB2_HUMAN          |
| Q01082               | 2             | 3.4899           | R.ALVADSHPESEI.I           | 1            | SPTB2_HUMAN          |
| Q01082               | 2             | 4.2166           | K.VIESTQDLGNDLAGVMALQR.K   | 1            | SPTB2_HUMAN          |
| Q01082               | 3             | 5.8003           | K.TKVIESTQDLGNDLAGVMALQR.K | 2            | SPTB2_HUMAN          |
| Q01082               | 2             | 4.5936           | K.TALPAQSAATLPAR.T         | 4            | SPTB2_HUMAN          |
| Q01082               | 2             | 4.2938           | K.MWEVLESTTQTK.A           | 3            | SPTB2_HUMAN          |
| Q01082               | 1             | 2.4945           | R.DLVAIEAK.L               | 2            | SPTB2_HUMAN          |
| Q01082               | 3             | 4.1321           | K.HYASEEIKEK.L             | 1            | SPTB2_HUMAN          |
| Q01082               | 3             | 7.2007           | K.HQILEQAVEDYAETVHQLSK.T   | 4            | SPTB2_HUMAN          |
| Q01082               | 2             | 3.0605           | K.FMELLEPLNER.K            | 2            | SPTB2_HUMAN          |
| Q01082               | 2             | 3.768            | K.FM#ELLEPLNER.K           | 3            | SPTB2_HUMAN          |
| Q01082               | 3             | 3.7569           | K.EIQFNDRDVEDEILWVGER.M    | 1            | SPTB2_HUMAN          |
| Q01082               | 2             | 3.6783           | K.EIEELQSQAQALSQEGK.S      | 3            | SPTB2_HUMAN          |
| Q01082               | 3             | 4.0468           | K.AKDEQSAVSMLK.K.H         | 1            | SPTB2_HUMAN          |
| Q01082               | 2             | 2.8334           | K.QQMLENQMEVR.K            | 1            | SPTB2_HUMAN          |
| Q01082               | 2             | 4.0877           | R.LVSDGNINSDRIQEK.V        | 2            | SPTB2_HUMAN          |
| Q01082               | 2             | 3.3385           | K.AKDEQSAVSMLK.K           | 2            | SPTB2_HUMAN          |

***Sperm antigen with calponin homology and coiled-coil domains 1 - Homo sapiens (Human)***

|        |   |        |                                |   |             |
|--------|---|--------|--------------------------------|---|-------------|
| Q5M775 | 2 | 4.008  | R.VKNEEPTTQEGK.I               | 1 | SPEC1_HUMAN |
| Q5M775 | 4 | 4.8593 | K.ASESDAEIKDMKETIFELEDQVEQHR.A | 1 | SPEC1_HUMAN |
| Q5M775 | 2 | 2.8414 | K.LMNLLQER.V                   | 2 | SPEC1_HUMAN |
| Q5M775 | 2 | 2.7716 | R.LDLPDLPLSDILK.G              | 1 | SPEC1_HUMAN |
| Q5M775 | 2 | 3.1793 | R.AEQLSQENEK.L                 | 2 | SPEC1_HUMAN |
| Q5M775 | 3 | 5.334  | R.KVEEENQGALEMIKR.L            | 1 | SPEC1_HUMAN |

***Sperm surface protein Sp17 - Homo sapiens (Human)***

|        |   |        |                    |   |            |
|--------|---|--------|--------------------|---|------------|
| Q15506 | 2 | 4.0343 | R.IPQGFNLLLEGLTR.E | 1 | SP17_HUMAN |
|--------|---|--------|--------------------|---|------------|

| <i>Accession No*</i>                                                                   | <i>Charge</i> | <i>XC(Max)**</i> | <i>Peptide*</i>                     | <i>TC***</i> | <i>Reference No*</i> |
|----------------------------------------------------------------------------------------|---------------|------------------|-------------------------------------|--------------|----------------------|
| <b><i>Sperm-associated antigen 7 - Homo sapiens (Human)</i></b>                        |               |                  |                                     |              |                      |
| O75391                                                                                 | 3             | 6.03             | K.LKELAQEQEEAAQQGPVVVSPASDYK.D      | 2            | SPAG7_HUMAN          |
| O75391                                                                                 | 2             | 3.0441           | R.SIEEAMNEIR.A                      | 2            | SPAG7_HUMAN          |
| O75391                                                                                 | 2             | 3.7524           | K.EFAPSDEELDSYR.R                   | 2            | SPAG7_HUMAN          |
| O75391                                                                                 | 2             | 2.7534           | K.DAAHMLQANK.T                      | 1            | SPAG7_HUMAN          |
| <b><i>Spermatogenesis-associated serine-rich protein 2. - Homo sapiens (Human)</i></b> |               |                  |                                     |              |                      |
| Q86XZ4                                                                                 | 2             | 3.3931           | K.SVSIQEEQSAPSSEK.G                 | 1            | Q86XZ4_HUMAN         |
| Q86XZ4                                                                                 | 2             | 4.0235           | R.TGSMLQNGVSDFETK.S                 | 1            | Q86XZ4_HUMAN         |
| <b><i>Sperm-specific antigen 2 - Homo sapiens (Human)</i></b>                          |               |                  |                                     |              |                      |
| P28290                                                                                 | 2             | 4.5667           | K.LGEESGIVESK.L                     | 4            | SSFA2_HUMAN          |
| P28290                                                                                 | 2             | 3.4785           | K.GESSSPSPAEEK.G                    | 1            | SSFA2_HUMAN          |
| P28290                                                                                 | 2             | 3.9336           | R.TPLGASLDEQSSSTLK.G                | 2            | SSFA2_HUMAN          |
| P28290                                                                                 | 2             | 5.2458           | R.EIVSGLLAAVSSSK.A                  | 4            | SSFA2_HUMAN          |
| P28290                                                                                 | 2             | 3.8405           | K.EEVSGSSAAVTENADSDR.I              | 2            | SSFA2_HUMAN          |
| P28290                                                                                 | 2             | 2.8332           | R.EASAESDVGK.S                      | 1            | SSFA2_HUMAN          |
| <b><i>S-phase kinase-associated protein 1A - Homo sapiens (Human)</i></b>              |               |                  |                                     |              |                      |
| P63208                                                                                 | 3             | 4.3003           | K.TM#LEDLGM#DDEGDDDPVPLPNVNAAILKK.V | 1            | SKP1_HUMAN           |
| P63208                                                                                 | 2             | 3.5391           | K.NDFTEEEEAQVRK.E                   | 2            | SKP1_HUMAN           |
| P63208                                                                                 | 2             | 4.756            | K.RTDDIPVWDQEFK.V                   | 4            | SKP1_HUMAN           |
| P63208                                                                                 | 3             | 5.7084           | K.TFNIKNDFTEEEAQVRK.E               | 2            | SKP1_HUMAN           |
| P63208                                                                                 | 2             | 3.6127           | K.LQSSDGEIFEVDVEIAK.Q               | 1            | SKP1_HUMAN           |
| P63208                                                                                 | 2             | 4.019            | R.TDDIPVWDQEFK.V                    | 3            | SKP1_HUMAN           |
| P63208                                                                                 | 3             | 5.236            | K.TM#LEDLGM#DDEGDDDPVPLPNVNAAILKK.V | 1            | SKP1_HUMAN           |
| P63208                                                                                 | 2             | 3.7305           | K.NDFTEEEEAQVRK.K                   | 3            | SKP1_HUMAN           |
| P63208                                                                                 | 3             | 5.4404           | K.TFNIKNDFTEEEAQVRK.K               | 4            | SKP1_HUMAN           |
| <b><i>Splicing factor 1 - Homo sapiens (Human)</i></b>                                 |               |                  |                                     |              |                      |
| Q15637                                                                                 | 3             | 4.1791           | K.VMIPQDEYPEINFVGLLIGPR.G           | 3            | SF01_HUMAN           |
| Q15637                                                                                 | 3             | 3.8408           | K.DGQM#LPGEDEPLHALVTANTM#ENVK.K     | 1            | SF01_HUMAN           |
| Q15637                                                                                 | 3             | 4.0456           | K.DGQM#LPGEDEPLHALVTANTMENVK.K      | 1            | SF01_HUMAN           |
| Q15637                                                                                 | 3             | 4.2996           | K.VM#IPQDEYPEINFVGLLIGPR.G          | 1            | SF01_HUMAN           |
| Q15637                                                                                 | 2             | 4.391            | R.AYIVQLQIEDLTR.K                   | 1            | SF01_HUMAN           |
| Q15637                                                                                 | 2             | 3.9168           | K.FQRPGDPQSAQDK.A                   | 5            | SF01_HUMAN           |
| Q15637                                                                                 | 4             | 5.1737           | R.HNLITEMVALNPDFKPPADYKPPATR.V      | 2            | SF01_HUMAN           |
| Q15637                                                                                 | 2             | 3.3455           | R.ILRPWQSSETR.S                     | 3            | SF01_HUMAN           |

Accession No\* Charge XC(Max)\*\* Peptide\* TC\*\*\* Reference No\*

**Splicing factor 3 subunit 1 - Homo sapiens (Human)**

|        |   |        |                          |   |             |
|--------|---|--------|--------------------------|---|-------------|
| Q15459 | 3 | 4.0208 | R.TQQAQANITLQEIEAIHK.A   | 1 | SF3A1_HUMAN |
| Q15459 | 3 | 3.9266 | R.EKQSDDEVYAPGLDIESSLK.Q | 1 | SF3A1_HUMAN |

**Splicing factor 3B subunit 1 - Homo sapiens (Human)**

|        |   |        |                                    |   |             |
|--------|---|--------|------------------------------------|---|-------------|
| O75533 | 3 | 4.1414 | R.TDRGGDSIGETPTPGASKR.K            | 1 | SF3B1_HUMAN |
| O75533 | 2 | 4.6158 | K.VVNGAAASQPPSK.R                  | 2 | SF3B1_HUMAN |
| O75533 | 2 | 2.7488 | R.TYMDVMR.E                        | 1 | SF3B1_HUMAN |
| O75533 | 2 | 3.6295 | K.THEDIEAQIR.E                     | 3 | SF3B1_HUMAN |
| O75533 | 3 | 4.0295 | K.IWDPTPSHTPAGAATPGR.G             | 1 | SF3B1_HUMAN |
| O75533 | 3 | 4.8878 | K.KAALDEAQQVGLDSTGYDQEIYGGSDSR.F   | 1 | SF3B1_HUMAN |
| O75533 | 3 | 4.6657 | K.KLSSWDQAETPGHTPSLR.W             | 1 | SF3B1_HUMAN |
| O75533 | 3 | 4.4864 | K.SRWDETPASQM#GGSTPVLTPGK.T        | 1 | SF3B1_HUMAN |
| O75533 | 3 | 4.2318 | R.NRPLSDEELDAM#FPEGYK.V            | 1 | SF3B1_HUMAN |
| O75533 | 2 | 4.6904 | R.RWDQTADQTPGATPK.K                | 4 | SF3B1_HUMAN |
| O75533 | 2 | 2.9959 | R.WDETPASQM#GGSTPVLTPGK.T          | 1 | SF3B1_HUMAN |
| O75533 | 2 | 5.0429 | R.WDQTADQTPGATPK.K                 | 4 | SF3B1_HUMAN |
| O75533 | 3 | 5.0388 | K.TPIGTPAMNMATPTPGHIMSMTPEQLQAWR.W | 1 | SF3B1_HUMAN |
| O75533 | 3 | 4.7527 | R.NRPLSDEELDAMFPEGYK.V             | 3 | SF3B1_HUMAN |
| O75533 | 2 | 4.3101 | R.TDRGGDSIGETPTPGASKR.R            | 4 | SF3B1_HUMAN |
| O75533 | 2 | 2.969  | R.LDPFADGGKTPDPK.M                 | 1 | SF3B1_HUMAN |
| O75533 | 2 | 2.7319 | R.EQHILTKEER.E                     | 1 | SF3B1_HUMAN |
| O75533 | 2 | 3.6449 | K.VVNGAAASQPPSKR.K                 | 2 | SF3B1_HUMAN |
| O75533 | 2 | 3.7622 | R.AKGSETPGATPGSK.I                 | 2 | SF3B1_HUMAN |
| O75533 | 2 | 3.7248 | R.GGDSIGETPTPGASKR.R               | 2 | SF3B1_HUMAN |
| O75533 | 2 | 3.8629 | R.GGDSIGETPTPGASKR.K               | 1 | SF3B1_HUMAN |

**Splicing factor 3B subunit 2 - Homo sapiens (Human)**

|        |   |        |                             |   |             |
|--------|---|--------|-----------------------------|---|-------------|
| Q13435 | 2 | 3.8524 | R.QEEM#NSQQEEEEEMETDAR.S    | 2 | SF3B2_HUMAN |
| Q13435 | 2 | 5.1877 | R.QEEM#NSQQEEEEEM#ETDAR.S   | 4 | SF3B2_HUMAN |
| Q13435 | 3 | 6.1101 | K.ESRQEEMNSQQEEEEEM#ETDAR.S | 2 | SF3B2_HUMAN |
| Q13435 | 2 | 3.936  | R.AAVLLEQERQQEIAK.M         | 3 | SF3B2_HUMAN |
| Q13435 | 1 | 2.2052 | K.IPQALEK.I                 | 1 | SF3B2_HUMAN |
| Q13435 | 3 | 6.7901 | K.ESRQEEMNSQQEEEEEMETDAR.S  | 1 | SF3B2_HUMAN |
| Q13435 | 3 | 5.2085 | R.QEEMNSQQEEEEEMETDAR.S     | 9 | SF3B2_HUMAN |

**Splicing factor, arginine/serine-rich 1 - Homo sapiens (Human)**

|        |   |        |                              |   |             |
|--------|---|--------|------------------------------|---|-------------|
| Q07955 | 4 | 5.3176 | R.RGGPPFAFVEFEDPRDAEDAVYGR.D | 3 | SFRS1_HUMAN |
|--------|---|--------|------------------------------|---|-------------|

| <i>Accession No*</i> | <i>Charge</i> | <i>XC(Max)**</i> | <i>Peptide*</i>          | <i>TC***</i> | <i>Reference No*</i> |
|----------------------|---------------|------------------|--------------------------|--------------|----------------------|
| Q07955               | 2             | 3.3548           | R.DAEDAVYGR.D            | 3            | SFRS1_HUMAN          |
| Q07955               | 2             | 3.7502           | R.VVVSGLPPSGSWQDLKDHMR.E | 1            | SFRS1_HUMAN          |
| Q07955               | 2             | 2.9216           | R.VVVSGLPPSGSWQDLK.D     | 1            | SFRS1_HUMAN          |
| Q07955               | 2             | 3.6922           | R.SHEGETAYIR.V           | 10           | SFRS1_HUMAN          |
| Q07955               | 2             | 4.3377           | R.IYVGNLPPDIR.T          | 24           | SFRS1_HUMAN          |
| Q07955               | 2             | 3.5257           | R.DGYDYDGYR.L            | 10           | SFRS1_HUMAN          |
| Q07955               | 3             | 4.5138           | R.DAEDAVYGRDGYDYDGYR.L   | 1            | SFRS1_HUMAN          |
| Q07955               | 2             | 3.298            | K.DIEDVFK.Y              | 2            | SFRS1_HUMAN          |
| Q07955               | 2             | 3.1839           | R.DGTGVVEFVR.K           | 7            | SFRS1_HUMAN          |
| Q07955               | 3             | 4.1302           | R.TKDIEDVFK.Y            | 9            | SFRS1_HUMAN          |

***Splicing factor, arginine/serine-rich 12 - Homo sapiens (Human)***

|        |   |        |                       |   |             |
|--------|---|--------|-----------------------|---|-------------|
| Q8WXA9 | 2 | 2.7528 | K.EVDDKDAPR.T         | 1 | SFR12_HUMAN |
| Q8WXA9 | 2 | 3.1116 | R.MAGDETQPTR.F        | 1 | SFR12_HUMAN |
| Q8WXA9 | 2 | 2.7249 | K.EPDSSVSKEVDDKDAPR.T | 1 | SFR12_HUMAN |

***Splicing factor, arginine/serine-rich 130 - Homo sapiens (Human)***

|        |   |        |                  |   |             |
|--------|---|--------|------------------|---|-------------|
| Q8TF01 | 2 | 3.4568 | K.ATEDAEGGDGPR.L | 1 | SFR18_HUMAN |
|--------|---|--------|------------------|---|-------------|

***Splicing factor, arginine/serine-rich 15 - Homo sapiens (Human)***

|        |   |        |                                   |   |             |
|--------|---|--------|-----------------------------------|---|-------------|
| O95104 | 2 | 4.8476 | K.TVEPPISQVGNVDTASELEK.G          | 5 | SFR15_HUMAN |
| O95104 | 3 | 5.9382 | K.GVSEAAVLKPEELPAEATSSVEPEKDSGSAA | 3 | SFR15_HUMAN |
| O95104 | 2 | 3.2449 | K.DSGSAAEAPR.-                    | 1 | SFR15_HUMAN |

***Splicing factor, arginine/serine-rich 2 - Homo sapiens (Human)***

|        |   |        |                 |   |             |
|--------|---|--------|-----------------|---|-------------|
| Q01130 | 2 | 2.9789 | R.YGRPPDSHHSR.R | 2 | SFRS2_HUMAN |
| Q01130 | 1 | 2.1005 | R.YGGGGYGR.R    | 1 | SFRS2_HUMAN |

***Splicing factor, arginine/serine-rich 2B - Homo sapiens (Human)***

|        |   |        |                        |   |              |
|--------|---|--------|------------------------|---|--------------|
| Q9BRL6 | 2 | 3.1577 | R.DAQDAEAAM#DGAELDGR.E | 1 | Q9BRL6_HUMAN |
| Q9BRL6 | 2 | 4.2935 | R.DAQDAEAAMDGAELDGR.E  | 2 | Q9BRL6_HUMAN |

***Splicing factor, arginine/serine-rich 3 - Homo sapiens (Human)***

|        |   |        |                       |   |             |
|--------|---|--------|-----------------------|---|-------------|
| P84103 | 3 | 3.8686 | R.VRVELSNGEK.R        | 2 | SFRS3_HUMAN |
| P84103 | 3 | 4.635  | R.VRVELSNGEKR.S       | 2 | SFRS3_HUMAN |
| P84103 | 2 | 3.1023 | R.NRGPPPSWGR.R        | 1 | SFRS3_HUMAN |
| P84103 | 2 | 3.1676 | R.AFGYYGPLR.S         | 2 | SFRS3_HUMAN |
| P84103 | 2 | 3.5872 | K.VYVGNLGNNGNK.T      | 4 | SFRS3_HUMAN |
| P84103 | 1 | 2.1522 | R.DAADAVR.E           | 1 | SFRS3_HUMAN |
| P84103 | 2 | 4.2904 | K.VYVGNLGNNGNKTELER.A | 5 | SFRS3_HUMAN |

Accession No\* Charge XC(Max)\*\* Peptide\* TC\*\*\* Reference No\*

***Splicing factor, arginine/serine-rich 4 - Homo sapiens (Human)***

|        |   |        |                      |   |             |
|--------|---|--------|----------------------|---|-------------|
| Q08170 | 2 | 2.7541 | K.SKPNLPSESR.S       | 2 | SFRS4_HUMAN |
| Q08170 | 2 | 4.3303 | R.EGRGESENAGTNQETR.S | 2 | SFRS4_HUMAN |
| Q08170 | 2 | 4.3358 | R.GESENAGTNQETR.S    | 4 | SFRS4_HUMAN |
| Q08170 | 2 | 3.0352 | R.LVEDKPGSR.R        | 3 | SFRS4_HUMAN |

***Splicing factor, arginine/serine-rich 5 - Homo sapiens (Human)***

|        |   |        |            |   |             |
|--------|---|--------|------------|---|-------------|
| Q13243 | 2 | 2.8942 | R.VSWQLK.D | 2 | SFRS5_HUMAN |
|--------|---|--------|------------|---|-------------|

***Splicing factor, arginine/serine-rich 7 - Homo sapiens (Human)***

|        |   |        |                           |   |             |
|--------|---|--------|---------------------------|---|-------------|
| Q16629 | 1 | 3.5615 | K.VYVGNLGTGAGK.G          | 3 | SFRS7_HUMAN |
| Q16629 | 2 | 3.6367 | R.VELSTGMPR.R             | 2 | SFRS7_HUMAN |
| Q16629 | 2 | 2.9668 | R.RPFDPNDR.C              | 2 | SFRS7_HUMAN |
| Q16629 | 2 | 2.9111 | R.NPPGFAFVEFEDPRDAEDAVR.G | 2 | SFRS7_HUMAN |
| Q16629 | 2 | 3.4066 | R.AFSYYGPLR.T             | 4 | SFRS7_HUMAN |
| Q16629 | 2 | 3.3395 | R.VRVELSTGMPR.R           | 5 | SFRS7_HUMAN |
| Q16629 | 2 | 4.6043 | K.VYVGNLGTGAGKGELER.A     | 3 | SFRS7_HUMAN |

***Splicing factor, arginine/serine-rich 9 - Homo sapiens (Human)***

|        |   |        |                    |   |             |
|--------|---|--------|--------------------|---|-------------|
| Q13242 | 2 | 2.8773 | R.HGLVPFAFVR.F     | 4 | SFRS9_HUMAN |
| Q13242 | 3 | 3.7073 | R.FEDPRDAEDAIYGR.N | 1 | SFRS9_HUMAN |
| Q13242 | 2 | 3.8345 | R.IYVGNLPTDVR.E    | 2 | SFRS9_HUMAN |

***Splicing factor, proline- and glutamine-rich - Homo sapiens (Human)***

|        |   |        |                         |   |            |
|--------|---|--------|-------------------------|---|------------|
| P23246 | 3 | 4.293  | R.RMEELHNQEMQK.R        | 1 | SFPQ_HUMAN |
| P23246 | 2 | 4.718  | R.FGQQGAGPVGQQGPR.G     | 3 | SFPQ_HUMAN |
| P23246 | 2 | 3.3614 | R.GM#GPGTPAGYGR.G       | 1 | SFPQ_HUMAN |
| P23246 | 2 | 3.348  | R.MGGGGAMNMGDPYGGGQK.F  | 1 | SFPQ_HUMAN |
| P23246 | 2 | 4.6822 | R.M#GGGGAMNMGDPYGGGQK.F | 1 | SFPQ_HUMAN |

***Squamous cell carcinoma antigen recognized by T-cells 3 - Homo sapiens (Human)***

|        |   |        |                                    |   |             |
|--------|---|--------|------------------------------------|---|-------------|
| Q15020 | 3 | 5.7481 | R.ALQRPSAAAPQAENGPAAAPAVAAPAATEAPK | 1 | SART3_HUMAN |
|--------|---|--------|------------------------------------|---|-------------|

***SRA stem-loop-interacting RNA-binding protein, mitochondrial precursor - Homo sapiens (Huma***

|        |   |        |                    |   |             |
|--------|---|--------|--------------------|---|-------------|
| Q9GZT3 | 2 | 4.1677 | R.GLGWVQFSSEGLR.N  | 1 | SLIRP_HUMAN |
| Q9GZT3 | 2 | 2.9738 | K.LPQTSDDK.K       | 1 | SLIRP_HUMAN |
| Q9GZT3 | 2 | 3.661  | K.LPQTSDDK.KDF.-   | 6 | SLIRP_HUMAN |
| Q9GZT3 | 2 | 3.3085 | R.SINQPVAFVR.R     | 4 | SLIRP_HUMAN |
| Q9GZT3 | 2 | 4.4829 | R.NALQQENHIIDGVK.V | 3 | SLIRP_HUMAN |

| <i>Accession No*</i>                                                               | <i>Charge</i> | <i>XC(Max)**</i> | <i>Peptide*</i>            | <i>TC***</i> | <i>Reference No*</i> |
|------------------------------------------------------------------------------------|---------------|------------------|----------------------------|--------------|----------------------|
| Q9GZT3                                                                             | 2             | 3.481            | R.RIPWTAASSQLK.E           | 1            | SLIRP_HUMAN          |
| <b><i>Src substrate cortactin - Homo sapiens (Human)</i></b>                       |               |                  |                            |              |                      |
| Q14247                                                                             | 2             | 3.2031           | R.QDSAAVGFYDYEK.L          | 3            | SRC8_HUMAN           |
| Q14247                                                                             | 3             | 4.8099           | K.LAKHESQQDYK.G            | 3            | SRC8_HUMAN           |
| Q14247                                                                             | 2             | 3.9036           | K.LQLHESQKDYK.T            | 2            | SRC8_HUMAN           |
| <b><i>Stathmin - Homo sapiens (Human)</i></b>                                      |               |                  |                            |              |                      |
| P16949                                                                             | 2             | 3.7658           | K.ESKDKPADETEAD.-          | 4            | STMN1_HUMAN          |
| P16949                                                                             | 2             | 3.7064           | K.NKESKDKPADETEAD.-        | 3            | STMN1_HUMAN          |
| <b><i>STE20-like serine/threonine-protein kinase - Homo sapiens (Human)</i></b>    |               |                  |                            |              |                      |
| Q9H2G2                                                                             | 2             | 3.1166           | K.DSGSISLQETR.R            | 1            | SLK_HUMAN            |
| Q9H2G2                                                                             | 2             | 3.1812           | K.VTTQIDKEK.K              | 4            | SLK_HUMAN            |
| Q9H2G2                                                                             | 2             | 3.02             | R.SVVADTDQK.A              | 3            | SLK_HUMAN            |
| Q9H2G2                                                                             | 2             | 3.8805           | K.ALGSEVQDASK.V            | 4            | SLK_HUMAN            |
| Q9H2G2                                                                             | 2             | 4.0304           | K.LINKPMVGPEAGGTK.E        | 1            | SLK_HUMAN            |
| Q9H2G2                                                                             | 2             | 3.4859           | K.VDEDSAEDTQSNQDGK.E       | 1            | SLK_HUMAN            |
| Q9H2G2                                                                             | 2             | 3.6942           | R.SNSEDKLNK.I              | 3            | SLK_HUMAN            |
| Q9H2G2                                                                             | 2             | 3.4359           | K.LGEDDKTQK.D              | 2            | SLK_HUMAN            |
| <b><i>Steroid receptor RNA activator 1 - Homo sapiens (Human)</i></b>              |               |                  |                            |              |                      |
| Q9HD15                                                                             | 2             | 3.2603           | R.LALLQEQWAGGK.L           | 2            | SRA1_HUMAN           |
| Q9HD15                                                                             | 2             | 4.2606           | R.SLFSEEAANEK.S            | 1            | SRA1_HUMAN           |
| Q9HD15                                                                             | 2             | 4.5776           | R.VPASETSPGPPPMGPPPPSSK.A  | 3            | SRA1_HUMAN           |
| Q9HD15                                                                             | 3             | 4.5595           | R.VPASETSPGPPPM#GPPPPSSK.A | 3            | SRA1_HUMAN           |
| <b><i>STIP1 homology and U box-containing protein 1 - Homo sapiens (Human)</i></b> |               |                  |                            |              |                      |
| Q9UNE7                                                                             | 3             | 3.7999           | R.NHEGDEDDSHVR.A           | 1            | STUB1_HUMAN          |
| <b><i>Stomatin-like protein 2 - Homo sapiens (Human)</i></b>                       |               |                  |                            |              |                      |
| Q9UJZ1                                                                             | 2             | 4.7121           | R.DVQGTASLDEELDRVK.M       | 3            | STML2_HUMAN          |
| Q9UJZ1                                                                             | 2             | 4.808            | R.DVQGTASLDEELDR.V         | 3            | STML2_HUMAN          |
| Q9UJZ1                                                                             | 2             | 3.2896           | K.APVPGTDPDSLSSGSSR.D      | 2            | STML2_HUMAN          |
| <b><i>Stress-70 protein, mitochondrial precursor - Homo sapiens (Human)</i></b>    |               |                  |                            |              |                      |
| P38646                                                                             | 3             | 4.385            | K.MKETAENYLGHTAK.N         | 2            | GRP75_HUMAN          |
| P38646                                                                             | 2             | 2.8772           | K.DDIENMVK.N               | 1            | GRP75_HUMAN          |
| P38646                                                                             | 2             | 3.756            | R.EQQIVQSSGGLSK.D          | 2            | GRP75_HUMAN          |
| P38646                                                                             | 2             | 4.4733           | K.DAGQISGLNVL.R.V          | 4            | GRP75_HUMAN          |

| <i>Accession No*</i>                                                                                       | <i>Charge</i> | <i>XC(Max)**</i> | <i>Peptide*</i>              | <i>TC***</i> | <i>Reference No*</i> |
|------------------------------------------------------------------------------------------------------------|---------------|------------------|------------------------------|--------------|----------------------|
| P38646                                                                                                     | 2             | 2.9702           | K.AM#QDAEVSK.S               | 4            | GRP75_HUMAN          |
| P38646                                                                                                     | 2             | 3.2966           | K.DSETGENIR.Q                | 3            | GRP75_HUMAN          |
| P38646                                                                                                     | 3             | 5.7921           | K.ERVEAVNMAEGIIHDTETK.M      | 3            | GRP75_HUMAN          |
| P38646                                                                                                     | 2             | 2.7965           | K.LFEMAYK.K                  | 1            | GRP75_HUMAN          |
| P38646                                                                                                     | 3             | 4.3278           | K.LYSPSQIGAFVLM#K.M          | 1            | GRP75_HUMAN          |
| P38646                                                                                                     | 2             | 4.1404           | K.VQQTVDLFR.A                | 7            | GRP75_HUMAN          |
| P38646                                                                                                     | 2             | 3.4427           | K.VLENAEGAR.T                | 10           | GRP75_HUMAN          |
| P38646                                                                                                     | 2             | 4.666            | R.AQFEGIVTDLIR.R             | 3            | GRP75_HUMAN          |
| P38646                                                                                                     | 2             | 2.9068           | R.ETGVDLTKDNMALQR.V          | 1            | GRP75_HUMAN          |
| P38646                                                                                                     | 2             | 3.8779           | R.QAASSLQQASLK.L             | 3            | GRP75_HUMAN          |
| P38646                                                                                                     | 2             | 3.7639           | R.QAVTNPNTFYATK.R            | 2            | GRP75_HUMAN          |
| P38646                                                                                                     | 3             | 4.3902           | R.VEAVNMAEGIIHDTETK.M        | 1            | GRP75_HUMAN          |
| P38646                                                                                                     | 2             | 3.2483           | K.NAVITVPAYFNDSQR.Q          | 2            | GRP75_HUMAN          |
| P38646                                                                                                     | 2             | 3.7353           | R.TTPSVVAFTADGER.L           | 4            | GRP75_HUMAN          |
| <b><i>Stress-induced-phosphoprotein 1 - Homo sapiens (Human)</i></b>                                       |               |                  |                              |              |                      |
| P31948                                                                                                     | 2             | 3.5601           | K.AAALEFLNR.F                | 3            | STIP1_HUMAN          |
| P31948                                                                                                     | 2             | 3.859            | R.KAAALEFLNR.F               | 2            | STIP1_HUMAN          |
| <b><i>Striatin - Homo sapiens (Human)</i></b>                                                              |               |                  |                              |              |                      |
| O43815                                                                                                     | 3             | 3.9959           | K.FLESAAADFSEDEDDDDVDGREK.S  | 2            | STRN_HUMAN           |
| O43815                                                                                                     | 2             | 2.9379           | K.ALPDSGEDRDTK.E             | 1            | STRN_HUMAN           |
| <b><i>Stromal interaction molecule 1 precursor - Homo sapiens (Human)</i></b>                              |               |                  |                              |              |                      |
| Q13586                                                                                                     | 3             | 4.5204           | K.AHSLM#ELSPSAPPGGSPHLDSSR.S | 1            | STIM1_HUMAN          |
| Q13586                                                                                                     | 2             | 4.264            | R.SHSPSPDPDTPSPVGDSR.A       | 5            | STIM1_HUMAN          |
| Q13586                                                                                                     | 2             | 2.8135           | R.LTEPQHGLGSQR.D             | 1            | STIM1_HUMAN          |
| Q13586                                                                                                     | 3             | 3.923            | K.KAVAEEDNGSIGEETDSSPGR.K    | 1            | STIM1_HUMAN          |
| Q13586                                                                                                     | 2             | 4.0143           | K.AVAEEDNGSIGEETDSSPGR.K     | 1            | STIM1_HUMAN          |
| Q13586                                                                                                     | 3             | 4.436            | K.AHSLMELSPSAPPGGSPHLDSSR.S  | 2            | STIM1_HUMAN          |
| <b><i>Structural maintenance of chromosomes protein 3 - Homo sapiens (Human)</i></b>                       |               |                  |                              |              |                      |
| Q9UQE7                                                                                                     | 2             | 2.7205           | K.RLDQVEQELNELR.E            | 1            | SMC3_HUMAN           |
| <b><i>Succinyl-CoA ligase [ADP-forming] beta-chain, mitochondrial precursor - Homo sapiens (Human)</i></b> |               |                  |                              |              |                      |
| Q9P2R7                                                                                                     | 2             | 3.4546           | K.SPDEAYAIK.K                | 2            | SUCB1_HUMAN          |
| <b><i>Succinyl-CoA ligase [GDP-forming] beta-chain, mitochondrial precursor - Homo sapiens (Human)</i></b> |               |                  |                              |              |                      |
| Q96I99                                                                                                     | 3             | 3.9162           | K.DIFAMDDKSENEPIENEAAY       | 1            | SUCB2_HUMAN          |
| Q96I99                                                                                                     | 2             | 3.0596           | K.INFDDNAEFR.Q               | 1            | SUCB2_HUMAN          |

| <i>Accession No*</i>                                                                    | <i>Charge</i> | <i>XC(Max)**</i> | <i>Peptide*</i>                     | <i>TC***</i> | <i>Reference No*</i> |
|-----------------------------------------------------------------------------------------|---------------|------------------|-------------------------------------|--------------|----------------------|
| Q96199                                                                                  | 2             | 4.3285           | R.FFVADTANEALEAAK.R                 | 2            | SUCB2_HUMAN          |
| <b><i>Sulfatase-modifying factor 2 precursor - Homo sapiens (Human)</i></b>             |               |                  |                                     |              |                      |
| Q8NB7                                                                                   | 2             | 3.711            | R.MGNTPDSASDNLGFR.C                 | 1            | SUMF2_HUMAN          |
| Q8NB7                                                                                   | 2             | 3.8131           | R.M#GNTPDSASDNLGFR.C                | 2            | SUMF2_HUMAN          |
| Q8NB7                                                                                   | 2             | 3.2199           | R.LPTEEEWEFAAR.G                    | 1            | SUMF2_HUMAN          |
| Q8NB7                                                                                   | 2             | 2.9365           | K.SVLWWLPVEK.A                      | 3            | SUMF2_HUMAN          |
| <b><i>Sulfiredoxin-1 - Homo sapiens (Human)</i></b>                                     |               |                  |                                     |              |                      |
| Q9BYN0                                                                                  | 2             | 3.2669           | R.YAAYQLQR.E                        | 2            | SRXN1_HUMAN          |
| <b><i>Sulfite oxidase, mitochondrial precursor - Homo sapiens (Human)</i></b>           |               |                  |                                     |              |                      |
| P51687                                                                                  | 3             | 6.212            | K.IGELNPEDKVAPTIVETSDPYADDPVR.H     | 1            | SUOX_HUMAN           |
| P51687                                                                                  | 2             | 3.4179           | R.DGETVESGEVTIK.G                   | 2            | SUOX_HUMAN           |
| P51687                                                                                  | 3             | 6.051            | K.VNSQRPFNAEPPPELLTENYITPNPIFFTR.N  | 1            | SUOX_HUMAN           |
| <b><i>Sulfotransferase 1C1 - Homo sapiens (Human)</i></b>                               |               |                  |                                     |              |                      |
| O00338                                                                                  | 2             | 3.8123           | K.SILDQSISSFMR.K                    | 2            | ST1C1_HUMAN          |
| <b><i>Superoxide dismutase [Cu-Zn] - Homo sapiens (Human)</i></b>                       |               |                  |                                     |              |                      |
| P00441                                                                                  | 2             | 4.7238           | R.TLVVHEKADDLGK.G                   | 3            | SODC_HUMAN           |
| P00441                                                                                  | 3             | 5.1452           | K.ADDLGKGGNEESTKTGNAGSR.L           | 4            | SODC_HUMAN           |
| P00441                                                                                  | 1             | 2.2902           | K.VWGSIK.G                          | 5            | SODC_HUMAN           |
| P00441                                                                                  | 4             | 6.0662           | R.HVGDLGNVTADKDGADVSIEDSVISLSGDHCII | 4            | SODC_HUMAN           |
| P00441                                                                                  | 3             | 6.5234           | R.TLVVHEKADDLGKGGNEESTK.T           | 2            | SODC_HUMAN           |
| P00441                                                                                  | 3             | 3.8413           | K.GDGPVQGIINFEQKESNGPVK.V           | 1            | SODC_HUMAN           |
| P00441                                                                                  | 2             | 4.1302           | K.ESNGPVKVWGSIK.G                   | 6            | SODC_HUMAN           |
| P00441                                                                                  | 3             | 5.1681           | K.GDGPVQGIINFEQK.E                  | 153          | SODC_HUMAN           |
| P00441                                                                                  | 2             | 4.5306           | K.ADDLGKGGNEESTK.T                  | 39           | SODC_HUMAN           |
| P00441                                                                                  | 2             | 3.9468           | R.HVGDLGNVTADK.D                    | 5            | SODC_HUMAN           |
| <b><i>Superoxide dismutase [Mn], mitochondrial precursor - Homo sapiens (Human)</i></b> |               |                  |                                     |              |                      |
| P04179                                                                                  | 2             | 2.9932           | K.AIWNVINWENVTER.Y                  | 1            | SODM_HUMAN           |
| <b><i>Supervillin - Homo sapiens (Human)</i></b>                                        |               |                  |                                     |              |                      |
| O95425                                                                                  | 2             | 2.8808           | R.DASSLYPGTETMGLR.T                 | 1            | SVIL_HUMAN           |
| O95425                                                                                  | 2             | 3.2865           | R.AAEFGTEPTSEQTGAAGK.T              | 1            | SVIL_HUMAN           |
| O95425                                                                                  | 2             | 3.1231           | K.YGSFEEAEASYPILNR.A                | 3            | SVIL_HUMAN           |
| O95425                                                                                  | 2             | 3.7006           | K.APASSLHTQEAGR.S                   | 1            | SVIL_HUMAN           |
| O95425                                                                                  | 3             | 4.5565           | K.HAHSSSLQQAASR.S                   | 1            | SVIL_HUMAN           |



| <i>Accession No*</i>                                                                                          | <i>Charge</i> | <i>XC(Max)**</i> | <i>Peptide*</i>                  | <i>TC***</i> | <i>Reference No*</i> |
|---------------------------------------------------------------------------------------------------------------|---------------|------------------|----------------------------------|--------------|----------------------|
| O95425                                                                                                        | 2             | 4.467            | R.SNEEEETSDDSSLEK.Q              | 3            | SVIL_HUMAN           |
| O95425                                                                                                        | 2             | 3.3              | R.SPVEMEDDFDVIFDPYAPK.L          | 2            | SVIL_HUMAN           |
| O95425                                                                                                        | 2             | 4.3956           | R.YQTQPVTLGEVEQVQSGK.L           | 2            | SVIL_HUMAN           |
| O95425                                                                                                        | 2             | 3.718            | R.RGQELSATR.Q                    | 6            | SVIL_HUMAN           |
| O95425                                                                                                        | 2             | 4.3229           | K.SQAWQPLVEGSENK.G               | 1            | SVIL_HUMAN           |
| O95425                                                                                                        | 2             | 3.6318           | K.TPTGEGLLDPSK.T                 | 2            | SVIL_HUMAN           |
| <b><i>Suppressor of G2 allele of SKP1 homolog - Homo sapiens (Human)</i></b>                                  |               |                  |                                  |              |                      |
| Q9Y2Z0                                                                                                        | 2             | 3.184            | K.LEGDAALNR.L                    | 1            | SUGT1_HUMAN          |
| Q9Y2Z0                                                                                                        | 2             | 2.7361           | K.NLYPSSSPYTR.N                  | 1            | SUGT1_HUMAN          |
| Q9Y2Z0                                                                                                        | 2             | 4.5063           | R.LFQQIYSDGSDEVKR.A              | 2            | SUGT1_HUMAN          |
| <b><i>Suppressor of hairy wing homolog 4 - Homo sapiens (Human)</i></b>                                       |               |                  |                                  |              |                      |
| Q6N043                                                                                                        | 2             | 3.7277           | R.LASDNVNSIDQFLR.K               | 1            | SUHW4_HUMAN          |
| Q6N043                                                                                                        | 2             | 2.9285           | K.SNTSKPNTIKSNASK.P              | 2            | SUHW4_HUMAN          |
| <b><i>Suppressor of SWI4 1 homolog - Homo sapiens (Human)</i></b>                                             |               |                  |                                  |              |                      |
| Q9NQ55                                                                                                        | 2             | 2.8642           | R.VGGSDEEASGIPSR.T               | 1            | SSF1_HUMAN           |
| <b><i>Surfeit locus protein 6 - Homo sapiens (Human)</i></b>                                                  |               |                  |                                  |              |                      |
| O75683                                                                                                        | 2             | 3.23             | K.TQGSETAGPPK.K                  | 2            | SURF6_HUMAN          |
| <b><i>Survival of motor neuron-related-splicing factor 30 - Homo sapiens (Human)</i></b>                      |               |                  |                                  |              |                      |
| O75940                                                                                                        | 3             | 6.3164           | K.AQLQQVEAALSGNGENEDLLK.L        | 3            | SPF30_HUMAN          |
| <b><i>Sushi domain-containing protein 2 precursor - Homo sapiens (Human)</i></b>                              |               |                  |                                  |              |                      |
| Q9UGT4                                                                                                        | 2             | 2.7708           | R.GEYVLEAALTDLR.V                | 1            | SUSD2_HUMAN          |
| <b><i>SUV3-like protein 1 - Homo sapiens (Human)</i></b>                                                      |               |                  |                                  |              |                      |
| O43630                                                                                                        | 2             | 3.3243           | K.ATEPPSPDAGELSLASR.L            | 3            | O43630_HUMAN         |
| O43630                                                                                                        | 2             | 4.6212           | R.LVQQGLLTPDMLK.Q                | 5            | O43630_HUMAN         |
| <b><i>SWI/SNF-related matrix-associated actin-dependent regulator of chromatin subfamily A containin</i></b>  |               |                  |                                  |              |                      |
| Q9H4L7                                                                                                        | 3             | 3.7456           | K.LIESTSTMDGAIAAALLM#FGDAGGGPR.K | 1            | SMRCD_HUMAN          |
| <b><i>SWI/SNF-related matrix-associated actin-dependent regulator of chromatin subfamily A-like prote</i></b> |               |                  |                                  |              |                      |
| Q9NZC9                                                                                                        | 2             | 2.9318           | K.LLAEQHQR.T                     | 1            | SMAL1_HUMAN          |
| <b><i>Switch-associated protein 70 - Homo sapiens (Human)</i></b>                                             |               |                  |                                  |              |                      |
| Q9UH65                                                                                                        | 2             | 3.3427           | K.SSELEQYLQR.V                   | 1            | SWP70_HUMAN          |
| <b><i>Symplekin - Homo sapiens (Human)</i></b>                                                                |               |                  |                                  |              |                      |
| Q92797                                                                                                        | 2             | 3.6592           | R.SPQTLAPVGEDAM#K.T              | 2            | SYMPK_HUMAN          |

| <i>Accession No*</i>                                                    | <i>Charge</i> | <i>XC(Max)**</i> | <i>Peptide*</i>                     | <i>TC***</i> | <i>Reference No*</i> |
|-------------------------------------------------------------------------|---------------|------------------|-------------------------------------|--------------|----------------------|
| Q92797                                                                  | 2             | 3.4973           | R.SPQTLAPVGEDAMK.T                  | 4            | SYMPK_HUMAN          |
| Q92797                                                                  | 2             | 3.9911           | K.TPSPAEDAREPEAK.G                  | 1            | SYMPK_HUMAN          |
| <b><i>Synaptojanin-2 - Homo sapiens (Human)</i></b>                     |               |                  |                                     |              |                      |
| O15056                                                                  | 3             | 3.9824           | R.DLEASSEPEPTPGAAPETPQAPLLPR.R      | 1            | SYNJ2_HUMAN          |
| <b><i>Synaptojanin-2-binding protein - Homo sapiens (Human)</i></b>     |               |                  |                                     |              |                      |
| P57105                                                                  | 2             | 2.9678           | R.NAGYAVSLR.V                       | 1            | SYJ2B_HUMAN          |
| <b><i>Synaptophysin-like protein 1 - Homo sapiens (Human)</i></b>       |               |                  |                                     |              |                      |
| Q16563                                                                  | 2             | 3.2423           | K.TVTATFGYPFR.L                     | 1            | SYPL1_HUMAN          |
| <b><i>Synaptopodin - Homo sapiens (Human)</i></b>                       |               |                  |                                     |              |                      |
| Q8N3V7                                                                  | 3             | 4.5731           | R.QRDQGEVGVVEEPPFALGAEASNFQQEPAPR.D | 1            | SYNPO_HUMAN          |
| Q8N3V7                                                                  | 3             | 4.8057           | K.VASEEEEEVPLVVYLK.E                | 5            | SYNPO_HUMAN          |
| Q8N3V7                                                                  | 2             | 4.0441           | K.VTPNPDLLDLVQTADK.R                | 2            | SYNPO_HUMAN          |
| Q8N3V7                                                                  | 3             | 4.0719           | K.VYSEVHFTLAKPPSVVNR.T              | 2            | SYNPO_HUMAN          |
| Q8N3V7                                                                  | 2             | 2.836            | K.YPTNAPGAFR.V                      | 1            | SYNPO_HUMAN          |
| Q8N3V7                                                                  | 2             | 4.0054           | K.YVIESSSHTPELAR.C                  | 2            | SYNPO_HUMAN          |
| Q8N3V7                                                                  | 2             | 3.2545           | R.AASPAKPSLDLVPNLPK.G               | 2            | SYNPO_HUMAN          |
| Q8N3V7                                                                  | 2             | 4.2479           | R.PFGIQAPGGTSQMER.S                 | 2            | SYNPO_HUMAN          |
| Q8N3V7                                                                  | 2             | 3.0098           | K.APAPQPPSLPDR.S                    | 3            | SYNPO_HUMAN          |
| Q8N3V7                                                                  | 3             | 4.7246           | R.TARPFGIQAPGGTSQM#ER.S             | 2            | SYNPO_HUMAN          |
| Q8N3V7                                                                  | 2             | 4.0809           | R.TARPFGIQAPGGTSQMER.S              | 3            | SYNPO_HUMAN          |
| Q8N3V7                                                                  | 2             | 4.5362           | R.SPPSYSVLYPSSDPK.S                 | 5            | SYNPO_HUMAN          |
| Q8N3V7                                                                  | 2             | 4.0794           | K.TGILEESMAR.R                      | 2            | SYNPO_HUMAN          |
| <b><i>Synaptopodin-2 - Homo sapiens (Human)</i></b>                     |               |                  |                                     |              |                      |
| Q9UMS6                                                                  | 2             | 3.3766           | K.GASGPLVALPGAEEK.S                 | 1            | SYNP2_HUMAN          |
| Q9UMS6                                                                  | 2             | 3.8969           | R.VIQESEAGDAGLPR.V                  | 2            | SYNP2_HUMAN          |
| Q9UMS6                                                                  | 2             | 3.0323           | R.AQSPTPSLPASWK.Y                   | 2            | SYNP2_HUMAN          |
| Q9UMS6                                                                  | 2             | 2.7098           | R.RSESLSEK.Q                        | 1            | SYNP2_HUMAN          |
| Q9UMS6                                                                  | 2             | 3.4146           | R.EQDAAQTDGLR.T                     | 4            | SYNP2_HUMAN          |
| Q9UMS6                                                                  | 2             | 3.3022           | K.VSPNPELLSLLQNSEGKR.G              | 1            | SYNP2_HUMAN          |
| <b><i>Synaptosomal-associated protein 23 - Homo sapiens (Human)</i></b> |               |                  |                                     |              |                      |
| O00161                                                                  | 3             | 4.3072           | K.DMALNIGNEIDAQNPQIK.R              | 1            | SNP23_HUMAN          |
| O00161                                                                  | 3             | 5.336            | K.DM#ALNIGNEIDAQNPQIK.R             | 2            | SNP23_HUMAN          |
| O00161                                                                  | 2             | 2.7602           | R.ITDKADTNR.D                       | 1            | SNP23_HUMAN          |
| O00161                                                                  | 2             | 3.1292           | R.DRIDIANAR.A                       | 2            | SNP23_HUMAN          |

| <i>Accession No*</i>                                                    | <i>Charge</i> | <i>XC(Max)**</i> | <i>Peptide*</i>        | <i>TC***</i> | <i>Reference No*</i> |
|-------------------------------------------------------------------------|---------------|------------------|------------------------|--------------|----------------------|
| O00161                                                                  | 2             | 3.0857           | R.IEEGLDQINK.D         | 2            | SNP23_HUMAN          |
| O00161                                                                  | 2             | 5.1901           | R.ILGLAIESQDAGIK.T     | 3            | SNP23_HUMAN          |
| O00161                                                                  | 2             | 4.5547           | K.TITMLDEQKEQLNR.I     | 2            | SNP23_HUMAN          |
| <b><i>Synaptosomal-associated protein 29 - Homo sapiens (Human)</i></b> |               |                  |                        |              |                      |
| O95721                                                                  | 2             | 4.581            | K.IDSNLDELSMGLGR.L     | 2            | SNP29_HUMAN          |
| O95721                                                                  | 2             | 3.0006           | R.GAGSAM#STDAYPK.N     | 1            | SNP29_HUMAN          |
| O95721                                                                  | 2             | 2.8534           | R.DLPDGPDPADR.Q        | 1            | SNP29_HUMAN          |
| O95721                                                                  | 2             | 3.4346           | R.SLALMYESEK.V         | 1            | SNP29_HUMAN          |
| <b><i>Syndecan-1 precursor - Homo sapiens (Human)</i></b>               |               |                  |                        |              |                      |
| P18827                                                                  | 3             | 3.8678           | K.KKDEGSYSLEEPK.Q      | 2            | SDC1_HUMAN           |
| P18827                                                                  | 2             | 4.8309           | K.EGEAVVLPVEPEGLTAR.E  | 4            | SDC1_HUMAN           |
| <b><i>Syndecan-4 precursor - Homo sapiens (Human)</i></b>               |               |                  |                        |              |                      |
| P31431                                                                  | 2             | 3.6356           | R.ISPVEESEDVSNK.V      | 4            | SDC4_HUMAN           |
| P31431                                                                  | 2             | 3.1931           | R.AGSGSQVPTEPK.K       | 5            | SDC4_HUMAN           |
| P31431                                                                  | 2             | 2.926            | K.LEENEVIPK.R          | 1            | SDC4_HUMAN           |
| P31431                                                                  | 2             | 4.5174           | K.RISPVEESEDVSNK.V     | 3            | SDC4_HUMAN           |
| P31431                                                                  | 2             | 3.8098           | K.KLEENEVIPK.R         | 6            | SDC4_HUMAN           |
| P31431                                                                  | 2             | 4.0337           | R.AGSGSQVPTEPKK.L      | 2            | SDC4_HUMAN           |
| <b><i>Syntaxin-3 - Homo sapiens (Human)</i></b>                         |               |                  |                        |              |                      |
| Q13277                                                                  | 3             | 5.0635           | K.TKDDLEQLTTEIKK.R     | 2            | STX3_HUMAN           |
| Q13277                                                                  | 2             | 5.3687           | K.TKDDLEQLTTEIK.K      | 2            | STX3_HUMAN           |
| Q13277                                                                  | 2             | 3.1542           | K.HIEEDEV.R.S          | 4            | STX3_HUMAN           |
| <b><i>Syntaxin-4 - Homo sapiens (Human)</i></b>                         |               |                  |                        |              |                      |
| Q12846                                                                  | 3             | 4.647            | K.TQHGVLSSQQFVELINK.C  | 1            | STX4_HUMAN           |
| Q12846                                                                  | 3             | 4.0912           | K.AIEPQKEEADENYSVNTR.M | 1            | STX4_HUMAN           |
| Q12846                                                                  | 2             | 3.2644           | R.HSEIQQLER.S          | 2            | STX4_HUMAN           |
| <b><i>Syntaxin-6 - Homo sapiens (Human)</i></b>                         |               |                  |                        |              |                      |
| O43752                                                                  | 2             | 4.1633           | K.AVNTAQLFQR.W         | 4            | STX6_HUMAN           |
| O43752                                                                  | 2             | 3.1768           | K.FNLDATELSIR.K        | 2            | STX6_HUMAN           |
| <b><i>Syntaxin-7 - Homo sapiens (Human)</i></b>                         |               |                  |                        |              |                      |
| O15400                                                                  | 2             | 3.3205           | K.EFGSLPTTPSEQR.Q      | 4            | STX7_HUMAN           |
| O15400                                                                  | 1             | 2.3532           | R.ISSNIQK.I            | 2            | STX7_HUMAN           |
| O15400                                                                  | 2             | 3.1812           | R.VSGSFPEDSSKER.N      | 2            | STX7_HUMAN           |

| <i>Accession No*</i> | <i>Charge</i> | <i>XC(Max)**</i> | <i>Peptide*</i>          | <i>TC***</i> | <i>Reference No*</i> |
|----------------------|---------------|------------------|--------------------------|--------------|----------------------|
| O15400               | 2             | 3.9158           | R.QLEADIM#DINEIFK.D      | 2            | STX7_HUMAN           |
| O15400               | 2             | 5.1084           | R.TLNQLGTPQDSPELR.Q      | 7            | STX7_HUMAN           |
| O15400               | 3             | 4.0196           | K.ETDKYIKEFGSLPTTPSEQR.Q | 2            | STX7_HUMAN           |
| O15400               | 1             | 2.1474           | R.EKEFVAR.V              | 1            | STX7_HUMAN           |
| O15400               | 2             | 5.3141           | R.LVAEFTTSLTNFQK.V       | 9            | STX7_HUMAN           |
| O15400               | 2             | 3.5746           | R.VSGSFPEDSSK.E          | 2            | STX7_HUMAN           |

***Syntaxin-8 - Homo sapiens (Human)***

|        |   |        |                     |   |            |
|--------|---|--------|---------------------|---|------------|
| Q9UNK0 | 2 | 2.7961 | R.GAPNPWLFEEPEETR.G | 1 | STX8_HUMAN |
| Q9UNK0 | 2 | 2.7472 | R.QNLLDDLVTRE.E     | 1 | STX8_HUMAN |

***Talin-1 - Homo sapiens (Human)***

|        |   |        |                             |   |            |
|--------|---|--------|-----------------------------|---|------------|
| Q9Y490 | 2 | 3.6211 | K.TLAESALQLLYTAK.E          | 2 | TLN1_HUMAN |
| Q9Y490 | 2 | 3.947  | K.EADESLNFEEQILEAAK.S       | 2 | TLN1_HUMAN |
| Q9Y490 | 2 | 2.8741 | K.AAGHPGDPEQQR.L            | 1 | TLN1_HUMAN |
| Q9Y490 | 2 | 3.9345 | K.ADAEGESDLENSR.K           | 2 | TLN1_HUMAN |
| Q9Y490 | 2 | 2.9783 | K.ALSTDPAAPNLK.S            | 1 | TLN1_HUMAN |
| Q9Y490 | 2 | 3.4323 | K.AVAEQIPLLQGVGR.G          | 1 | TLN1_HUMAN |
| Q9Y490 | 3 | 3.8426 | K.QAAASATQTIAAAQHAASPK.A    | 2 | TLN1_HUMAN |
| Q9Y490 | 3 | 3.9926 | K.VGAIPANALDDGQWSQGLISAAR.M | 2 | TLN1_HUMAN |
| Q9Y490 | 3 | 5.3034 | K.LLAALLEDEGGSGRPLLQAAK.G   | 5 | TLN1_HUMAN |
| Q9Y490 | 2 | 3.7642 | K.NLGTALAE LR.T             | 3 | TLN1_HUMAN |
| Q9Y490 | 2 | 3.5947 | K.GLAGAVSELLR.S             | 1 | TLN1_HUMAN |
| Q9Y490 | 3 | 3.7542 | R.GVGAAATAVTQALNELLQHVK.A   | 1 | TLN1_HUMAN |
| Q9Y490 | 2 | 4.4739 | R.LNEAAAGLNQAATELVQASR.G    | 1 | TLN1_HUMAN |
| Q9Y490 | 2 | 2.9385 | R.SAQPASAEPR.Q              | 3 | TLN1_HUMAN |
| Q9Y490 | 2 | 3.586  | K.GAAAHDPDSEEQQR.L          | 2 | TLN1_HUMAN |

***Talin-2 - Homo sapiens (Human)***

|        |   |        |               |   |            |
|--------|---|--------|---------------|---|------------|
| Q9Y4G6 | 2 | 3.0836 | K.ADDDDVVVK.T | 2 | TLN2_HUMAN |
|--------|---|--------|---------------|---|------------|

***Target of myb1 - Homo sapiens (Human)***

|        |   |        |                               |   |              |
|--------|---|--------|-------------------------------|---|--------------|
| Q86X74 | 2 | 4.804  | K.EVKYEAPQATDGLAGALDAR.Q      | 5 | Q86X74_HUMAN |
| Q86X74 | 2 | 3.2026 | R.AGLQSLEASGR.L               | 1 | Q86X74_HUMAN |
| Q86X74 | 2 | 3.9848 | R.LEDEFDMFALTR.G              | 6 | Q86X74_HUMAN |
| Q86X74 | 2 | 2.7618 | R.GSSLADQRK.E                 | 1 | Q86X74_HUMAN |
| Q86X74 | 2 | 4.894  | K.YEAPQATDGLAGALDAR.Q         | 2 | Q86X74_HUMAN |
| Q86X74 | 3 | 7.0326 | K.AADRLPNLSSPSAEGPPGPPSPAPR.K | 8 | Q86X74_HUMAN |

Accession No\* Charge XC(Max)\*\* Peptide\* TC\*\*\* Reference No\*

***TATA element modulatory factor - Homo sapiens (Human)***

|        |   |        |                    |   |            |
|--------|---|--------|--------------------|---|------------|
| P82094 | 2 | 3.0974 | K.SPVVSKPPAK.S     | 2 | TMF1_HUMAN |
| P82094 | 2 | 3.1605 | K.SNTEPQSPPIASPK.A | 2 | TMF1_HUMAN |
| P82094 | 2 | 3.1474 | K.TLLNSQLEM#ER.M   | 2 | TMF1_HUMAN |
| P82094 | 2 | 2.8222 | R.TPETTESQVK.D     | 2 | TMF1_HUMAN |
| P82094 | 2 | 2.9903 | R.LNSSETADLLK.E    | 2 | TMF1_HUMAN |
| P82094 | 2 | 4.0067 | R.LGESQTLAAVER.E   | 2 | TMF1_HUMAN |
| P82094 | 2 | 3.285  | R.HEIGELQQR.L      | 3 | TMF1_HUMAN |
| P82094 | 2 | 3.2276 | K.TLLNSQLEMER.M    | 2 | TMF1_HUMAN |
| P82094 | 2 | 4.745  | K.DSEAQEAALSR.E    | 3 | TMF1_HUMAN |
| P82094 | 2 | 4.4303 | K.IQMSSMESQNSLLR.Q | 3 | TMF1_HUMAN |

***TATA-binding protein-associated factor 2N - Homo sapiens (Human)***

|        |   |        |                                 |   |             |
|--------|---|--------|---------------------------------|---|-------------|
| Q92804 | 3 | 4.5451 | K.QSSYSQQPYNNQGGQQNMESSGSQGGR.A | 1 | RBP56_HUMAN |
| Q92804 | 2 | 3.4587 | K.AAIDWFDGKEFHGNIK.V            | 2 | RBP56_HUMAN |

***TATA-binding protein-associated phosphoprotein - Homo sapiens (Human)***

|        |   |        |                   |   |            |
|--------|---|--------|-------------------|---|------------|
| Q01658 | 2 | 3.0778 | R.LENLGIPEEELLR.Q | 2 | TBAP_HUMAN |
|--------|---|--------|-------------------|---|------------|

***Tax1-binding protein 1 - Homo sapiens (Human)***

|        |   |        |                                    |   |             |
|--------|---|--------|------------------------------------|---|-------------|
| Q86VP1 | 3 | 5.4528 | K.VNDASVNTDPATSASTVDVKPSPSAAEADFIV | 2 | TAXB1_HUMAN |
|--------|---|--------|------------------------------------|---|-------------|

***Tax1-binding protein 3 - Homo sapiens (Human)***

|        |   |        |                       |   |             |
|--------|---|--------|-----------------------|---|-------------|
| O14907 | 2 | 4.7994 | R.VSEGGPAEIALQLIGDK.I | 1 | TX1B3_HUMAN |
|--------|---|--------|-----------------------|---|-------------|

***TBC1 domain family member 1 - Homo sapiens (Human)***

|        |   |        |                  |   |             |
|--------|---|--------|------------------|---|-------------|
| Q86TI0 | 2 | 3.5359 | R.SLTESLESILSR.G | 2 | TBCD1_HUMAN |
|--------|---|--------|------------------|---|-------------|

***TBC1 domain family member 10A - Homo sapiens (Human)***

|        |   |        |                      |   |             |
|--------|---|--------|----------------------|---|-------------|
| Q9BXI6 | 2 | 2.8852 | R.LPLDAPLPGSK.A      | 1 | TB10A_HUMAN |
| Q9BXI6 | 2 | 3.9584 | K.DSAPQDLAPQVSAHHR.S | 3 | TB10A_HUMAN |
| Q9BXI6 | 2 | 3.9801 | R.APAAGESLSGTR.E     | 5 | TB10A_HUMAN |

***TBC1 domain family member 12 - Homo sapiens (Human)***

|        |   |        |                         |   |             |
|--------|---|--------|-------------------------|---|-------------|
| O60347 | 2 | 4.2928 | R.GVGAGGPEEGAPPATSAER.T | 2 | TBC12_HUMAN |
|--------|---|--------|-------------------------|---|-------------|

***TBC1 domain family member 22B - Homo sapiens (Human)***

|        |   |        |                   |   |             |
|--------|---|--------|-------------------|---|-------------|
| Q9NU19 | 2 | 3.2886 | R.SQSTTSVDPANYK.V | 2 | TB22B_HUMAN |
|--------|---|--------|-------------------|---|-------------|

***TBC1 domain family member 4 - Homo sapiens (Human)***

|        |   |        |                     |   |             |
|--------|---|--------|---------------------|---|-------------|
| O60343 | 2 | 4.0549 | R.ILED SGFDEQQEFR.S | 1 | TBCD4_HUMAN |
|--------|---|--------|---------------------|---|-------------|

| <i>Accession No*</i>                                                                         | <i>Charge</i> | <i>XC(Max)**</i> | <i>Peptide*</i>                   | <i>TC***</i> | <i>Reference No*</i> |
|----------------------------------------------------------------------------------------------|---------------|------------------|-----------------------------------|--------------|----------------------|
| <b><i>TBC1 domain family member 5 - Homo sapiens (Human)</i></b>                             |               |                  |                                   |              |                      |
| Q92609                                                                                       | 2             | 3.8791           | R.GQQQSVQMSGAIK.Q                 | 2            | TBCD5_HUMAN          |
| Q92609                                                                                       | 2             | 3.6493           | R.GSFSGQAQPLR.T                   | 3            | TBCD5_HUMAN          |
| Q92609                                                                                       | 3             | 4.1235           | R.TSAEAPSHHLQQQQQQQR.L            | 1            | TBCD5_HUMAN          |
| Q92609                                                                                       | 2             | 3.396            | K.NISSSPSVESLPGGR.E               | 1            | TBCD5_HUMAN          |
| Q92609                                                                                       | 3             | 4.4369           | R.HPLQPEEQEVGIDPLSSYSNK.S         | 1            | TBCD5_HUMAN          |
| <b><i>T-complex protein 1 subunit alpha - Homo sapiens (Human)</i></b>                       |               |                  |                                   |              |                      |
| P17987                                                                                       | 2             | 4.3455           | R.SQNVMAAASIANIVK.S               | 2            | TCPA_HUMAN           |
| <b><i>T-complex protein 1 subunit zeta - Homo sapiens (Human)</i></b>                        |               |                  |                                   |              |                      |
| P40227                                                                                       | 3             | 4.6272           | K.DGNVLLHEMQIQHPTASLIAK.V         | 1            | TCPZ_HUMAN           |
| <b><i>TDP43 - Homo sapiens (Human)</i></b>                                                   |               |                  |                                   |              |                      |
| A4GUK4                                                                                       | 2             | 3.748            | R.FGGNPGGFGNQGGFGNSR.G            | 2            | A4GUK4_HUMAN         |
| <b><i>Tektin-3 - Homo sapiens (Human)</i></b>                                                |               |                  |                                   |              |                      |
| Q9BXF9                                                                                       | 2             | 3.0277           | K.FTDDNILRSQSER.A                 | 2            | TEKT3_HUMAN          |
| <b><i>Telomerase-binding protein EST1A - Homo sapiens (Human)</i></b>                        |               |                  |                                   |              |                      |
| Q86US8                                                                                       | 3             | 4.5293           | R.GNVAKEEVANKPDR.A                | 1            | EST1A_HUMAN          |
| <b><i>Telomeric repeat-binding factor 2-interacting protein 1 - Homo sapiens (Human)</i></b> |               |                  |                                   |              |                      |
| Q9NYB0                                                                                       | 2             | 4.6534           | K.FNLDLSTVTQAFLK.N                | 1            | TE2IP_HUMAN          |
| Q9NYB0                                                                                       | 2             | 4.0573           | R.SPSSVTGNALWK.A                  | 4            | TE2IP_HUMAN          |
| Q9NYB0                                                                                       | 3             | 4.4537           | R.LGPASAADTGSEAKPGALAEAAEPEPQR.H  | 1            | TE2IP_HUMAN          |
| Q9NYB0                                                                                       | 3             | 4.1455           | R.KAEEDPEAADSGEPQNK.R.T           | 1            | TE2IP_HUMAN          |
| Q9NYB0                                                                                       | 2             | 3.2483           | K.FGAQNVAR.R                      | 6            | TE2IP_HUMAN          |
| Q9NYB0                                                                                       | 2             | 4.6961           | K.NSGELEATSAFLASGQR.A             | 4            | TE2IP_HUMAN          |
| Q9NYB0                                                                                       | 2             | 2.9904           | R.IAFTDADDVAILTYVK.E              | 1            | TE2IP_HUMAN          |
| <b><i>Tenascin precursor - Homo sapiens (Human)</i></b>                                      |               |                  |                                   |              |                      |
| P24821                                                                                       | 2             | 3.3571           | K.YAPISGGDHAQVDPK.S               | 2            | TENA_HUMAN           |
| P24821                                                                                       | 2             | 2.9338           | K.ETFTTGLDAPR.N                   | 1            | TENA_HUMAN           |
| P24821                                                                                       | 2             | 4.1987           | R.LEELENLVSSLR.E                  | 5            | TENA_HUMAN           |
| P24821                                                                                       | 2             | 4.4362           | R.NMNKEDEGEITK.S                  | 3            | TENA_HUMAN           |
| P24821                                                                                       | 2             | 3.0596           | R.RGDMSSNPAK.E                    | 4            | TENA_HUMAN           |
| P24821                                                                                       | 2             | 3.2636           | R.RPETSQR.Q                       | 3            | TENA_HUMAN           |
| P24821                                                                                       | 3             | 4.2604           | R.TTIDLTEDENQYSIGNLKPDEYEVSLISR.R | 1            | TENA_HUMAN           |
| P24821                                                                                       | 2             | 5.0553           | R.VPGDQTSTIIQELEPGVEYFIR.V        | 4            | TENA_HUMAN           |

Accession No\* Charge XC(Max)\*\* Peptide\* TC\*\*\* Reference No\*

**Tenascin-X precursor - Homo sapiens (Human)**

P22105 3 5.583 R.WRPQPPAEGPGGELTVPGTTR.T 3 TENX\_HUMAN

**Tensin-1 - Homo sapiens (Human)**

Q9HBL0 2 3.856 R.TVGTNTPPSPGFGR.R 7 TENS1\_HUMAN  
 Q9HBL0 3 6.7495 R.AASQQEIEQSIETLNM#LMLDLEPASAAAPLHK. 2 TENS1\_HUMAN  
 Q9HBL0 2 4.769 R.GLNSWQQQQQQQQPRPPR.Q 4 TENS1\_HUMAN  
 Q9HBL0 3 5.4106 R.RAASDGQYENQSPEATSPR.S 3 TENS1\_HUMAN  
 Q9HBL0 2 2.7759 R.QGSPTPALPEK.R 1 TENS1\_HUMAN  
 Q9HBL0 2 4.4497 R.AQFSVAGVHTVPGSPQAR.H 3 TENS1\_HUMAN  
 Q9HBL0 2 3.7909 R.SRPAGGSAVPSSGR.H 10 TENS1\_HUMAN  
 Q9HBL0 2 3.337 R.EQAIALLLKQDEPGAFIIR.D 1 TENS1\_HUMAN  
 Q9HBL0 2 3.0906 R.SGSLGQPSAQR.N 2 TENS1\_HUMAN  
 Q9HBL0 2 4.7335 R.SGYIPSGHSLGTPEPAPR.A 5 TENS1\_HUMAN  
 Q9HBL0 2 4.7348 K.TDKTDEVPVGASSATAALSPQEK.R 2 TENS1\_HUMAN  
 Q9HBL0 3 3.8242 K.EAFEEMEGTSPSSPPPSGVR.S 1 TENS1\_HUMAN  
 Q9HBL0 2 3.6281 R.TPTQPLLESGFR.S 7 TENS1\_HUMAN  
 Q9HBL0 1 2.1374 R.SPPGLAK.T 1 TENS1\_HUMAN  
 Q9HBL0 2 2.7624 R.VAGVQAR.E 3 TENS1\_HUMAN  
 Q9HBL0 3 5.52 R.TPEEEPLNLEGLVAHR.V 4 TENS1\_HUMAN  
 Q9HBL0 2 3.5364 R.LLSGFGLER.E 3 TENS1\_HUMAN  
 Q9HBL0 2 3.8844 R.PAGGSAVPSSGR.H 7 TENS1\_HUMAN  
 Q9HBL0 2 3.64 R.SQSFSEAEQLPPAPVR.G 7 TENS1\_HUMAN  
 Q9HBL0 2 2.8674 R.EKQPAEPPAPLR.R 3 TENS1\_HUMAN  
 Q9HBL0 3 3.9419 R.AASQQEIEQSIETLNMLMLDLEPASAAAPLHK.S 1 TENS1\_HUMAN  
 Q9HBL0 2 2.9463 K.VATTPGSPSLGR.H 2 TENS1\_HUMAN  
 Q9HBL0 3 5.3492 R.NYQSSSPLPTVGSYSSPDYSLQHFSSSPESQ 2 TENS1\_HUMAN  
 Q9HBL0 2 4.3037 R.AASDGQYENQSPEATSPR.S 9 TENS1\_HUMAN  
 Q9HBL0 2 3.6901 K.SYPMPEPMVNGGGYPYESASR.A 3 TENS1\_HUMAN  
 Q9HBL0 3 4.3043 K.SYPM#EPMVNGGGYPYESASR.A 4 TENS1\_HUMAN  
 Q9HBL0 2 4.0752 K.SQSVPGAWPGASPLSSQPLSGSSR.Q 3 TENS1\_HUMAN  
 Q9HBL0 3 4.9754 R.AASQQEIEQSIETLNMLM#LDLEPASAAAPLHK. 1 TENS1\_HUMAN  
 Q9HBL0 3 5.5955 R.HPAGVYQVSGLHMK.V 4 TENS1\_HUMAN  
 Q9HBL0 3 5.1052 R.AGPAHAGHTAPMRPSYSAQEGLAGYQR.E 2 TENS1\_HUMAN  
 Q9HBL0 2 2.796 R.HFLIETGPR.G 2 TENS1\_HUMAN  
 Q9HBL0 2 4.7284 K.SFSAPATQAYGHEIPLR.N 6 TENS1\_HUMAN  
 Q9HBL0 3 6.0277 K.EATSDPSRTPEEEPLNLEGLVAHR.V 5 TENS1\_HUMAN

Accession No\* Charge XC(Max)\*\* Peptide\* TC\*\*\* Reference No\*

***Tensin-3 - Homo sapiens (Human)***

|        |   |        |                                     |   |             |
|--------|---|--------|-------------------------------------|---|-------------|
| Q68CZ2 | 3 | 3.8007 | R.LILELDPTFEPIPTHMNALGSQANGSVSPDSVG | 1 | TENS3_HUMAN |
| Q68CZ2 | 2 | 3.4787 | K.AGV DYAPNLPPFPSPADVK.E            | 2 | TENS3_HUMAN |
| Q68CZ2 | 3 | 5.2534 | R.HPPFSPPEPPLSSPASQHK.G             | 4 | TENS3_HUMAN |
| Q68CZ2 | 2 | 2.9874 | R.LPDTGEGPSR.A                      | 6 | TENS3_HUMAN |
| Q68CZ2 | 2 | 3.8343 | K.AELDQLLSGFGLEDPGSSLK.E            | 2 | TENS3_HUMAN |
| Q68CZ2 | 2 | 3.7926 | R.GVGSGPHPPDTQQPSPSK.A              | 3 | TENS3_HUMAN |
| Q68CZ2 | 2 | 3.6531 | R.QGSSAEQPLGGR.L                    | 2 | TENS3_HUMAN |
| Q68CZ2 | 2 | 2.7562 | K.ASEAASPLPDSPGDK.L                 | 1 | TENS3_HUMAN |
| Q68CZ2 | 3 | 4.8946 | K.AELDQLLSGFGLEDPGSSLKEMTDAR.S      | 2 | TENS3_HUMAN |
| Q68CZ2 | 3 | 3.7647 | K.AGV DYAPNLPPFPSPADVKETMTPGYPQDLDI | 1 | TENS3_HUMAN |
| Q68CZ2 | 2 | 2.9895 | K.ETM#TPGYPQDLDIIDGR.I              | 2 | TENS3_HUMAN |

***Tensin-like C1 domain-containing phosphatase - Homo sapiens (Human)***

|        |   |        |                           |   |             |
|--------|---|--------|---------------------------|---|-------------|
| Q63HR2 | 3 | 5.9666 | R.HLPGPGQQPGWPGEQASSPAR.G | 2 | TENC1_HUMAN |
| Q63HR2 | 2 | 2.8875 | R.SPVPPTLPLGLR.H          | 1 | TENC1_HUMAN |
| Q63HR2 | 2 | 2.9891 | K.LALPTAALYGLR.L          | 3 | TENC1_HUMAN |
| Q63HR2 | 2 | 3.2763 | R.AGSISPGSPYPQSR.K        | 3 | TENC1_HUMAN |

***Testis-expressed sequence 2 protein - Homo sapiens (Human)***

|        |   |        |                  |   |            |
|--------|---|--------|------------------|---|------------|
| Q8IWB9 | 2 | 3.4201 | K.TSSSSPLSSPSK.S | 1 | TEX2_HUMAN |
|--------|---|--------|------------------|---|------------|

***Testis-specific Y-encoded-like protein 1 - Homo sapiens (Human)***

|        |   |        |                                |   |             |
|--------|---|--------|--------------------------------|---|-------------|
| Q9H0U9 | 3 | 4.1237 | R.TTPLQTHSIIISDQVPSDQDAHQYLR.L | 2 | TSYL1_HUMAN |
| Q9H0U9 | 3 | 4.3741 | K.AGQEEGQPPAEGLAAASVVMADDR.S   | 2 | TSYL1_HUMAN |
| Q9H0U9 | 3 | 3.8284 | R.SASELTAGAEAEAEVKTGK.C        | 1 | TSYL1_HUMAN |

***Tether containing UBX domain for GLUT4 - Homo sapiens (Human)***

|        |   |        |                            |   |             |
|--------|---|--------|----------------------------|---|-------------|
| Q9BZE9 | 2 | 3.7949 | R.AAGSPSPLPAPDPAPK.S       | 5 | ASPC1_HUMAN |
| Q9BZE9 | 2 | 3.9435 | K.SGQDPQQEQEQER.E          | 2 | ASPC1_HUMAN |
| Q9BZE9 | 3 | 4.5381 | R.GDLSRPEDADTSGPCCEHTQEK.Q | 2 | ASPC1_HUMAN |
| Q9BZE9 | 2 | 3.4288 | R.APAAAPFVFPFSGGQR.L       | 1 | ASPC1_HUMAN |

***Tetranectin precursor - Homo sapiens (Human)***

|        |   |        |                  |   |            |
|--------|---|--------|------------------|---|------------|
| P05452 | 2 | 3.9288 | R.LDTLAQEVALLK.E | 1 | TETN_HUMAN |
|--------|---|--------|------------------|---|------------|

***Tetraspanin-9 - Homo sapiens (Human)***

|        |   |        |                 |   |            |
|--------|---|--------|-----------------|---|------------|
| O75954 | 2 | 3.4641 | K.NAWNIIQAEMR.C | 2 | TSN9_HUMAN |
|--------|---|--------|-----------------|---|------------|

***Tetratricopeptide repeat protein 1 - Homo sapiens (Human)***



| <i>Accession No*</i>                                                                                               | <i>Charge</i> | <i>XC(Max)**</i> | <i>Peptide*</i>               | <i>TC***</i> | <i>Reference No*</i> |
|--------------------------------------------------------------------------------------------------------------------|---------------|------------------|-------------------------------|--------------|----------------------|
| Q99614                                                                                                             | 2             | 3.8448           | K.AIQLNPSYIR.A                | 4            | TTC1_HUMAN           |
| <b><i>Tetratricopeptide repeat, ankyrin repeat and coiled-coil-containing protein 1 - Homo sapiens (Human)</i></b> |               |                  |                               |              |                      |
| Q9C0D5                                                                                                             | 2             | 2.7171           | R.FQQQSNPPSR.S                | 1            | Q9C0D5_HUMAN         |
| <b><i>THAP domain-containing protein 10 - Homo sapiens (Human)</i></b>                                             |               |                  |                               |              |                      |
| Q9P2Z0                                                                                                             | 2             | 3.0255           | K.RLC*NATTQTEELWSR.T          | 1            | THA10_HUMAN          |
| <b><i>THAP domain-containing protein 4 - Homo sapiens (Human)</i></b>                                              |               |                  |                               |              |                      |
| Q8WY91                                                                                                             | 2             | 3.2798           | R.AAQEAASQEQAQQALER.T         | 1            | THAP4_HUMAN          |
| <b><i>Thiamine-triphosphatase - Homo sapiens (Human)</i></b>                                                       |               |                  |                               |              |                      |
| Q9BU02                                                                                                             | 2             | 4.1776           | K.LVLLGADEEEPQLR.V            | 3            | THTPA_HUMAN          |
| Q9BU02                                                                                                             | 3             | 4.1626           | R.ADGLGAGDVAAVLGLPLQEVASFVK.R | 1            | THTPA_HUMAN          |
| Q9BU02                                                                                                             | 2             | 2.9142           | R.LSSMLGVPAQETAPAK.L          | 1            | THTPA_HUMAN          |
| <b><i>Thioesterase superfamily member 2 - Homo sapiens (Human)</i></b>                                             |               |                  |                               |              |                      |
| Q9NPJ3                                                                                                             | 2             | 3.7488           | K.TLAFTSVDLTNK.A              | 1            | THEM2_HUMAN          |
| <b><i>Thioredoxin - Homo sapiens (Human)</i></b>                                                                   |               |                  |                               |              |                      |
| P10599                                                                                                             | 2             | 4.0216           | K.MIKPFFHSLSEK.Y              | 11           | THIO_HUMAN           |
| P10599                                                                                                             | 2             | 3.1149           | K.PFFHSLSEK.Y                 | 2            | THIO_HUMAN           |
| P10599                                                                                                             | 2             | 3.6168           | K.M#IKPFFHSLSEK.Y             | 4            | THIO_HUMAN           |
| <b><i>Thioredoxin domain-containing protein 1 precursor - Homo sapiens (Human)</i></b>                             |               |                  |                               |              |                      |
| Q9H3N1                                                                                                             | 3             | 3.8591           | K.KVEEEQEADEEDVSEEEAESK.E     | 1            | TXND1_HUMAN          |
| Q9H3N1                                                                                                             | 2             | 3.7501           | K.VEEEQEADEEDVSEEEAESK.E      | 1            | TXND1_HUMAN          |
| <b><i>Thioredoxin domain-containing protein 12 precursor - Homo sapiens (Human)</i></b>                            |               |                  |                               |              |                      |
| O95881                                                                                                             | 2             | 4.192            | K.YFYVSAEQVVQGMK.E            | 3            | TXD12_HUMAN          |
| O95881                                                                                                             | 3             | 4.6011           | K.VHPEIINENGNPSYK.Y           | 6            | TXD12_HUMAN          |
| O95881                                                                                                             | 2             | 4.3892           | K.EAAASGLPLMVIHK.S            | 2            | TXD12_HUMAN          |
| O95881                                                                                                             | 2             | 3.3602           | K.EAAASGLPLM#VIHK.S           | 1            | TXD12_HUMAN          |
| <b><i>Thioredoxin domain-containing protein 4 precursor - Homo sapiens (Human)</i></b>                             |               |                  |                               |              |                      |
| Q9BS26                                                                                                             | 3             | 5.0019           | R.HMYVFGDFKDVLPK.L            | 2            | TXND4_HUMAN          |
| Q9BS26                                                                                                             | 3             | 3.7719           | K.SDPIQEIRDLAEITLDR.S         | 1            | TXND4_HUMAN          |
| <b><i>Thioredoxin domain-containing protein 6 - Homo sapiens (Human)</i></b>                                       |               |                  |                               |              |                      |
| Q86XW9                                                                                                             | 1             | 2.5406           | K.AGEEAFEK.L                  | 3            | TXND6_HUMAN          |
| <b><i>Thioredoxin reductase 2, mitochondrial precursor - Homo sapiens (Human)</i></b>                              |               |                  |                               |              |                      |
| Q9NNW7                                                                                                             | 2             | 3.0486           | K.AGVDTSPTQK.I                | 1            | TRXR2_HUMAN          |

| <i>Accession No*</i>                                                                                   | <i>Charge</i> | <i>XC(Max)**</i> | <i>Peptide*</i>                | <i>TC***</i> | <i>Reference No*</i> |
|--------------------------------------------------------------------------------------------------------|---------------|------------------|--------------------------------|--------------|----------------------|
| <b><i>Thioredoxin, mitochondrial precursor - Homo sapiens (Human)</i></b>                              |               |                  |                                |              |                      |
| Q99757                                                                                                 | 3             | 3.8416           | K.FVGIKDEDQLEAFLK.K            | 2            | THIOM_HUMAN          |
| Q99757                                                                                                 | 3             | 4.7787           | K.FVGIKDEDQLEAFLK.L            | 5            | THIOM_HUMAN          |
| Q99757                                                                                                 | 3             | 5.02             | K.NGDVVDFKFGIKDEDQLEAFLK.K     | 1            | THIOM_HUMAN          |
| <b><i>Thioredoxin-dependent peroxide reductase, mitochondrial precursor - Homo sapiens (Human)</i></b> |               |                  |                                |              |                      |
| P30048                                                                                                 | 2             | 5.7285           | R.DYGVLLLEGSLALR.G             | 2            | PRDX3_HUMAN          |
| P30048                                                                                                 | 3             | 4.6131           | K.GTAVVNGEFKDLSDDFKGGK.Y       | 3            | PRDX3_HUMAN          |
| P30048                                                                                                 | 2             | 3.4319           | K.HLSVNDLPVGR.S                | 8            | PRDX3_HUMAN          |
| P30048                                                                                                 | 2             | 3.4523           | R.GLFIIDPNGVIK.H               | 4            | PRDX3_HUMAN          |
| <b><i>Thioredoxin-like protein 5 - Homo sapiens (Human)</i></b>                                        |               |                  |                                |              |                      |
| Q9BRA2                                                                                                 | 2             | 3.7219           | K.NLKVTAVPTLLK.Y               | 3            | TXNL5_HUMAN          |
| Q9BRA2                                                                                                 | 1             | 3.579            | K.TIFAYFTGSK.D                 | 3            | TXNL5_HUMAN          |
| Q9BRA2                                                                                                 | 2             | 2.7943           | K.VTAVPTLLK.Y                  | 2            | TXNL5_HUMAN          |
| Q9BRA2                                                                                                 | 2             | 4.1066           | R.YEEVSVSGFEFHR.A              | 2            | TXNL5_HUMAN          |
| <b><i>Thioredoxin-like protein 6 - Homo sapiens (Human)</i></b>                                        |               |                  |                                |              |                      |
| Q96CM4                                                                                                 | 2             | 2.901            | R.DGADEIQR.L                   | 2            | Q96CM4_HUMAN         |
| <b><i>Thioredoxin-like selenoprotein M precursor - Homo sapiens (Human)</i></b>                        |               |                  |                                |              |                      |
| Q8WWX9                                                                                                 | 3             | 5.2939           | R.IPLSEMTREEINALVQELGFYRK.A    | 1            | SELM_HUMAN           |
| Q8WWX9                                                                                                 | 2             | 2.8711           | R.RYEELER.I                    | 3            | SELM_HUMAN           |
| Q8WWX9                                                                                                 | 2             | 3.3704           | K.AFVTQDIPFYHNLVM#K.H          | 1            | SELM_HUMAN           |
| <b><i>THO complex subunit 4 - Homo sapiens (Human)</i></b>                                             |               |                  |                                |              |                      |
| Q86V81                                                                                                 | 2             | 3.7684           | K.MDMSLDDIIK.L                 | 3            | THOC4_HUMAN          |
| Q86V81                                                                                                 | 2             | 2.7298           | R.PM#NIQLVTSQIDAQR.R           | 1            | THOC4_HUMAN          |
| Q86V81                                                                                                 | 2             | 5.5627           | K.QQLSAEELDAQLDAYNAR.M         | 4            | THOC4_HUMAN          |
| Q86V81                                                                                                 | 2             | 2.777            | R.GAGGFGGGGGTR.R               | 2            | THOC4_HUMAN          |
| Q86V81                                                                                                 | 3             | 4.9089           | K.QLPDKWQHDLFDSGFGGGAGVETGGK.L | 3            | THOC4_HUMAN          |
| Q86V81                                                                                                 | 2             | 3.7209           | R.SLGTADVHFER.K                | 4            | THOC4_HUMAN          |
| <b><i>Thrombomodulin precursor - Homo sapiens (Human)</i></b>                                          |               |                  |                                |              |                      |
| P07204                                                                                                 | 3             | 5.4415           | R.SSVAADVISLLLNGDGGVGR.R       | 3            | TRBM_HUMAN           |
| <b><i>Thrombospondin type-1 domain-containing protein 4 - Homo sapiens (Human)</i></b>                 |               |                  |                                |              |                      |
| Q6ZMP0                                                                                                 | 2             | 4.6124           | R.SRDETPALAGTDASR.Q            | 1            | Q6ZMP0_HUMAN         |
| <b><i>Thrombospondin-1 precursor - Homo sapiens (Human)</i></b>                                        |               |                  |                                |              |                      |
| P07996                                                                                                 | 2             | 3.2425           | R.KVTEENKELANELR.R             | 1            | TSP1_HUMAN           |

| <i>Accession No*</i>                                                               | <i>Charge</i> | <i>XC(Max)**</i> | <i>Peptide*</i>                | <i>TC***</i> | <i>Reference No*</i> |
|------------------------------------------------------------------------------------|---------------|------------------|--------------------------------|--------------|----------------------|
| P07996                                                                             | 2             | 3.1709           | R.FTGSQPFQGGVEHATANK.Q         | 2            | TSP1_HUMAN           |
| P07996                                                                             | 2             | 3.8956           | R.TIVTTLQDSIR.K                | 4            | TSP1_HUMAN           |
| <b><i>Thymosin beta-10 - Homo sapiens (Human)</i></b>                              |               |                  |                                |              |                      |
| P63313                                                                             | 2             | 3.6955           | K.TETQEKNLPTK.E                | 2            | TYB10_HUMAN          |
| P63313                                                                             | 2             | 3.9782           | K.NTLPTKETIEQEK.R              | 5            | TYB10_HUMAN          |
| P63313                                                                             | 1             | 2.1328           | K.NTLPTK.E                     | 2            | TYB10_HUMAN          |
| P63313                                                                             | 3             | 4.6148           | K.TETQEKNLPTKETIEQEK.R         | 1            | TYB10_HUMAN          |
| P63313                                                                             | 2             | 3.761            | K.NTLPTKETIEQEK.R.S            | 5            | TYB10_HUMAN          |
| <b><i>Thyroid hormone receptor-associated protein 3 - Homo sapiens (Human)</i></b> |               |                  |                                |              |                      |
| Q9Y2W1                                                                             | 2             | 3.6054           | K.GSFSDTGLGDGK.M               | 5            | TR150_HUMAN          |
| Q9Y2W1                                                                             | 3             | 5.3489           | K.SPPSTGSTYSSQKEESAASGGAAYTK.R | 2            | TR150_HUMAN          |
| Q9Y2W1                                                                             | 2             | 3.1134           | K.EESAASGGAAYTKR.Y             | 2            | TR150_HUMAN          |
| Q9Y2W1                                                                             | 2             | 3.7555           | K.VIGANKNQEEEEK.S              | 1            | TR150_HUMAN          |
| Q9Y2W1                                                                             | 2             | 2.934            | K.MKSDSFAPK.T                  | 2            | TR150_HUMAN          |
| Q9Y2W1                                                                             | 2             | 4.2056           | K.WEGLVYAPPGK.E                | 5            | TR150_HUMAN          |
| Q9Y2W1                                                                             | 2             | 4.8176           | K.ASESSKPWPDATYGTGSASR.A       | 8            | TR150_HUMAN          |
| Q9Y2W1                                                                             | 2             | 3.1033           | R.ASAVSELSPR.E                 | 1            | TR150_HUMAN          |
| Q9Y2W1                                                                             | 2             | 4.8706           | R.KTEELEEEESFPER.S             | 4            | TR150_HUMAN          |
| Q9Y2W1                                                                             | 2             | 3.4906           | K.EQTFSGGTSQDTK.A              | 3            | TR150_HUMAN          |
| Q9Y2W1                                                                             | 2             | 3.408            | R.NREEEWDPEYTPK.S              | 2            | TR150_HUMAN          |
| Q9Y2W1                                                                             | 2             | 2.8648           | K.SDSFAPK.T                    | 1            | TR150_HUMAN          |
| Q9Y2W1                                                                             | 2             | 3.7571           | K.EKGSFSDTGLGDGK.M             | 1            | TR150_HUMAN          |
| Q9Y2W1                                                                             | 2             | 3.5355           | K.SPLQSVVVR.R                  | 5            | TR150_HUMAN          |
| Q9Y2W1                                                                             | 2             | 2.7419           | K.M#KSDSFAPK.T                 | 1            | TR150_HUMAN          |
| Q9Y2W1                                                                             | 2             | 4.4533           | K.SGKWEGLVYAPPGK.E             | 4            | TR150_HUMAN          |
| <b><i>Thyroid receptor-interacting protein 11 - Homo sapiens (Human)</i></b>       |               |                  |                                |              |                      |
| Q15643                                                                             | 3             | 4.4241           | K.TQLHEERQDIQTDNSDIFQETK.V     | 1            | TRIPB_HUMAN          |
| Q15643                                                                             | 2             | 3.3062           | R.LSSLNQDNSLAEDNLK.L           | 1            | TRIPB_HUMAN          |
| <b><i>Thyroxine-binding globulin precursor - Homo sapiens (Human)</i></b>          |               |                  |                                |              |                      |
| P05543                                                                             | 2             | 3.2288           | K.NALALFVLPK.E                 | 1            | THBG_HUMAN           |
| <b><i>Tight junction protein ZO-1 - Homo sapiens (Human)</i></b>                   |               |                  |                                |              |                      |
| Q07157                                                                             | 2             | 4.3935           | R.LLEPTPAPSTSYSPQADSLR.T       | 2            | ZO1_HUMAN            |
| Q07157                                                                             | 2             | 3.5803           | R.TPSTEA AHIMLR.D              | 2            | ZO1_HUMAN            |
| Q07157                                                                             | 2             | 3.0376           | R.IDSPGFKPASQQK.A              | 1            | ZO1_HUMAN            |

| <i>Accession No*</i>                                                         | <i>Charge</i> | <i>XC(Max)**</i> | <i>Peptide*</i>                    | <i>TC***</i> | <i>Reference No*</i> |
|------------------------------------------------------------------------------|---------------|------------------|------------------------------------|--------------|----------------------|
| Q07157                                                                       | 2             | 3.6801           | R.IPEPQKPQLKPPEDIVR.S              | 1            | ZO1_HUMAN            |
| Q07157                                                                       | 3             | 4.2111           | K.AEASSPVPYLSPETNPASSTSAVNHNVNLTNV | 1            | ZO1_HUMAN            |
| Q07157                                                                       | 2             | 3.7535           | R.DQEPSLSSHVDPTK.V                 | 4            | ZO1_HUMAN            |
| <b><i>Tight junction protein ZO-2 - Homo sapiens (Human)</i></b>             |               |                  |                                    |              |                      |
| Q9UDY2                                                                       | 2             | 2.9441           | R.SSEPQVQHEESIR.K                  | 2            | ZO2_HUMAN            |
| Q9UDY2                                                                       | 2             | 3.0473           | R.RAASSDQLR.D                      | 2            | ZO2_HUMAN            |
| Q9UDY2                                                                       | 2             | 4.0157           | K.SNPSAVAGNETPGASTK.G              | 4            | ZO2_HUMAN            |
| Q9UDY2                                                                       | 3             | 3.8293           | R.IEIAQKHPDIYAVPIK.T               | 2            | ZO2_HUMAN            |
| Q9UDY2                                                                       | 3             | 4.0979           | R.SILKPSTPIPPQEGEEVGESSEEQDNAPK.S  | 3            | ZO2_HUMAN            |
| Q9UDY2                                                                       | 2             | 3.9456           | R.M#QELQEAQNAR.I                   | 2            | ZO2_HUMAN            |
| Q9UDY2                                                                       | 2             | 4.1657           | R.MQELQEAQNAR.I                    | 5            | ZO2_HUMAN            |
| <b><i>Tight junction-associated protein 1 - Homo sapiens (Human)</i></b>     |               |                  |                                    |              |                      |
| Q5JTD0                                                                       | 2             | 4.1391           | R.GTEEGPGTSHTEGR.A                 | 2            | TJAP1_HUMAN          |
| <b><i>TOM1-like protein 2 - Homo sapiens (Human)</i></b>                     |               |                  |                                    |              |                      |
| Q6ZVM7                                                                       | 3             | 4.0714           | K.AAEM#VPDLPSPPMEAPAPASNPGR.K      | 1            | TM1L2_HUMAN          |
| Q6ZVM7                                                                       | 2             | 3.876            | R.DGFDMFAQTR.G                     | 4            | TM1L2_HUMAN          |
| Q6ZVM7                                                                       | 3             | 4.4147           | R.KVTYEDPQAVGGLASALDNR.K           | 3            | TM1L2_HUMAN          |
| Q6ZVM7                                                                       | 4             | 5.5263           | R.TDLKGDDLEEGVTSEEFDKFLEER.A       | 2            | TM1L2_HUMAN          |
| Q6ZVM7                                                                       | 2             | 4.1094           | K.TVTYEDPQAVGGLASALDNR.K           | 3            | TM1L2_HUMAN          |
| Q6ZVM7                                                                       | 3             | 5.0879           | R.KVTYEDPQAVGGLASALDNRK.Q          | 1            | TM1L2_HUMAN          |
| Q6ZVM7                                                                       | 2             | 2.82             | R.DGFDM#FAQTR.G                    | 2            | TM1L2_HUMAN          |
| Q6ZVM7                                                                       | 2             | 2.8402           | R.GNSLAEQR.K                       | 2            | TM1L2_HUMAN          |
| <b><i>Torsin-1A-interacting protein 1 - Homo sapiens (Human)</i></b>         |               |                  |                                    |              |                      |
| Q5JTV8                                                                       | 3             | 4.1872           | R.LQQQHSEQPPLQSPVMTR.R             | 2            | TOIP1_HUMAN          |
| Q5JTV8                                                                       | 2             | 3.3411           | R.LAPQNGGSSDAPAYR.T                | 1            | TOIP1_HUMAN          |
| Q5JTV8                                                                       | 3             | 3.9856           | K.VNFSEEGETEEDDQDSSHSSVTTVK.A      | 1            | TOIP1_HUMAN          |
| Q5JTV8                                                                       | 2             | 3.1944           | R.FSDEPPEVYGFDFEPLVAK.E            | 1            | TOIP1_HUMAN          |
| Q5JTV8                                                                       | 3             | 4.7184           | R.DSHSSEEDEASSQTDLSTISK.K          | 3            | TOIP1_HUMAN          |
| Q5JTV8                                                                       | 2             | 3.9436           | R.SIQEAPVSEDLVIR.L                 | 2            | TOIP1_HUMAN          |
| Q5JTV8                                                                       | 3             | 4.0503           | R.LQQQHSEQPPLQSPVM#TR.R            | 1            | TOIP1_HUMAN          |
| <b><i>Torsin-1A-interacting protein 2 - Homo sapiens (Human)</i></b>         |               |                  |                                    |              |                      |
| Q8NFAQ8                                                                      | 3             | 4.4413           | K.EASDGTGASQEPPTTDSQEAQSPGHSSAGQE  | 2            | TOIP2_HUMAN          |
| Q8NFAQ8                                                                      | 2             | 4.5611           | K.DKTEDENKQSFDDGGK.G               | 2            | TOIP2_HUMAN          |
| <b><i>TP53-regulated inhibitor of apoptosis 1 - Homo sapiens (Human)</i></b> |               |                  |                                    |              |                      |

| <i>Accession No*</i>                                                                    | <i>Charge</i> | <i>XC(Max)**</i> | <i>Peptide*</i>                  | <i>TC***</i> | <i>Reference No*</i> |
|-----------------------------------------------------------------------------------------|---------------|------------------|----------------------------------|--------------|----------------------|
| O43715                                                                                  | 2             | 3.6816           | K.EIPIEGLEFMGHGK.E               | 1            | TRIA1_HUMAN          |
| O43715                                                                                  | 2             | 3.6422           | K.EIPIEGLEFM#GHGK.E              | 3            | TRIA1_HUMAN          |
| <b><i>TRAF family member-associated NF-kappa-B activator - Homo sapiens (Human)</i></b> |               |                  |                                  |              |                      |
| Q92844                                                                                  | 2             | 4.0347           | K.TEETLFEIQGIDPIASAIQNLK.T       | 2            | TANK_HUMAN           |
| <b><i>TRAF2 and NCK-interacting protein kinase - Homo sapiens (Human)</i></b>           |               |                  |                                  |              |                      |
| Q9UKE5                                                                                  | 3             | 4.7462           | R.VSTHSQEM#DSGTEYGM#GSSTK.A      | 2            | TNIK_HUMAN           |
| Q9UKE5                                                                                  | 3             | 5.2328           | R.VSTHSQEMDSGTEYGMGSSTK.A        | 1            | TNIK_HUMAN           |
| Q9UKE5                                                                                  | 3             | 4.1705           | R.VYQTSPTDEDEEDEESSAAALFTSELLR.Q | 1            | TNIK_HUMAN           |
| <b><i>TRAF-type zinc finger domain-containing protein 1 - Homo sapiens (Human)</i></b>  |               |                  |                                  |              |                      |
| O14545                                                                                  | 2             | 3.0506           | R.LDSQPQETSPELPR.R               | 2            | TRAD1_HUMAN          |
| O14545                                                                                  | 2             | 3.7188           | K.LSNSDSQDIQGR.N                 | 2            | TRAD1_HUMAN          |
| <b><i>Transcription elongation factor A protein 1 - Homo sapiens (Human)</i></b>        |               |                  |                                  |              |                      |
| P23193                                                                                  | 2             | 3.5948           | K.LLDGPSTEKDLDEK.K               | 2            | TCEA1_HUMAN          |
| P23193                                                                                  | 2             | 3.4223           | K.NIPM#TLELLQSTR.I               | 2            | TCEA1_HUMAN          |
| P23193                                                                                  | 2             | 3.1666           | K.NAAGALDLLK.E                   | 3            | TCEA1_HUMAN          |
| P23193                                                                                  | 2             | 2.7703           | R.KQSTDEEVTSIAK.S                | 1            | TCEA1_HUMAN          |
| P23193                                                                                  | 2             | 4.1522           | R.MTAEEMASDELKEMR.K              | 3            | TCEA1_HUMAN          |
| P23193                                                                                  | 2             | 3.1672           | R.MTAEEMASDELK.E                 | 2            | TCEA1_HUMAN          |
| P23193                                                                                  | 2             | 3.0944           | K.NIPMTLELLQSTR.I                | 2            | TCEA1_HUMAN          |
| P23193                                                                                  | 2             | 3.1875           | R.IGMSVNAIR.K                    | 2            | TCEA1_HUMAN          |
| P23193                                                                                  | 2             | 3.2948           | R.EESTSSGNVSNR.K                 | 3            | TCEA1_HUMAN          |
| P23193                                                                                  | 2             | 2.7858           | R.APSTSDSVR.L                    | 1            | TCEA1_HUMAN          |
| P23193                                                                                  | 3             | 5.2117           | K.KKEPAITSQNSPEAR.E              | 3            | TCEA1_HUMAN          |
| <b><i>Transcription elongation factor A protein 3 - Homo sapiens (Human)</i></b>        |               |                  |                                  |              |                      |
| O75764                                                                                  | 2             | 2.8101           | R.NAMTQEAIR.E                    | 1            | TCEA3_HUMAN          |
| <b><i>Transcription elongation factor A protein-like 2 - Homo sapiens (Human)</i></b>   |               |                  |                                  |              |                      |
| Q9H3H9                                                                                  | 3             | 3.87             | K.KLENEGNTENTGKR.V               | 1            | TCAL2_HUMAN          |
| Q9H3H9                                                                                  | 3             | 3.8878           | R.AEGEGEPDSEREPESGEPESETR.A      | 2            | TCAL2_HUMAN          |
| <b><i>Transcription elongation factor A protein-like 3 - Homo sapiens (Human)</i></b>   |               |                  |                                  |              |                      |
| Q969E4                                                                                  | 3             | 5.1484           | K.REDEGEPGDEGQLEDEGSQEK.Q        | 2            | TCAL3_HUMAN          |
| Q969E4                                                                                  | 2             | 4.1679           | R.EDEGEPGDEGQLEDEGSQEK.Q         | 3            | TCAL3_HUMAN          |
| <b><i>Transcription elongation factor A protein-like 4 - Homo sapiens (Human)</i></b>   |               |                  |                                  |              |                      |
| Q96EI5                                                                                  | 2             | 2.9397           | R.EGESEM#EGGSER.E                | 1            | TCAL4_HUMAN          |

| <i>Accession No*</i>                                                                  | <i>Charge</i> | <i>XC(Max)**</i> | <i>Peptide*</i>                  | <i>TC***</i> | <i>Reference No*</i> |
|---------------------------------------------------------------------------------------|---------------|------------------|----------------------------------|--------------|----------------------|
| Q96EI5                                                                                | 2             | 3.1366           | R.EGESEMEGGSER.E                 | 3            | TCAL4_HUMAN          |
| Q96EI5                                                                                | 3             | 4.8408           | R.EGKPEIEGKPESEGEPPGSETR.A       | 5            | TCAL4_HUMAN          |
| <b><i>Transcription elongation factor A protein-like 6 - Homo sapiens (Human)</i></b> |               |                  |                                  |              |                      |
| Q6IPX3                                                                                | 3             | 5.2062           | R.KAEGEPGDEGQLEDKGSQEK.Q         | 1            | TCAL6_HUMAN          |
| Q6IPX3                                                                                | 2             | 2.9718           | K.RPAGDYVPR.K                    | 2            | TCAL6_HUMAN          |
| <b><i>Transcription elongation factor B polypeptide 1 - Homo sapiens (Human)</i></b>  |               |                  |                                  |              |                      |
| Q15369                                                                                | 2             | 3.4949           | K.AMLSPGQFAENETNEVNR.E           | 1            | ELOC_HUMAN           |
| <b><i>Transcription elongation factor B polypeptide 2 - Homo sapiens (Human)</i></b>  |               |                  |                                  |              |                      |
| Q15370                                                                                | 2             | 3.7236           | R.LYKDDQLLDDGK.T                 | 1            | ELOB_HUMAN           |
| <b><i>Transcription elongation factor B polypeptide 3 - Homo sapiens (Human)</i></b>  |               |                  |                                  |              |                      |
| Q14241                                                                                | 3             | 3.987            | K.SEKPAGADLAK.L                  | 1            | ELOA1_HUMAN          |
| <b><i>Transcription elongation factor SPT5 - Homo sapiens (Human)</i></b>             |               |                  |                                  |              |                      |
| O00267                                                                                | 2             | 3.9258           | R.TPMYGSQTPLQDGSR.T              | 2            | SPT5H_HUMAN          |
| O00267                                                                                | 2             | 3.8875           | R.TPM#YGSQTPLQDGSR.T             | 1            | SPT5H_HUMAN          |
| O00267                                                                                | 2             | 3.4029           | R.TPAQSGAWDPNPNTPSR.A            | 2            | SPT5H_HUMAN          |
| O00267                                                                                | 2             | 4.3464           | K.VVSISSEHLEPITPK.N              | 2            | SPT5H_HUMAN          |
| O00267                                                                                | 2             | 4.0415           | K.VRDTYLDTQVVGQTGVIR.S           | 3            | SPT5H_HUMAN          |
| <b><i>Transcription elongation factor SPT6 - Homo sapiens (Human)</i></b>             |               |                  |                                  |              |                      |
| Q7KZ85                                                                                | 3             | 7.0043           | K.KFVEEEDDDDEEEEEENLDDQDEQGNLK.G | 2            | SPT6H_HUMAN          |
| Q7KZ85                                                                                | 3             | 3.9189           | R.TSFDDRLEDDDFDLIEENLGVK.V       | 1            | SPT6H_HUMAN          |
| <b><i>Transcription factor 20 - Homo sapiens (Human)</i></b>                          |               |                  |                                  |              |                      |
| Q9UGU0                                                                                | 2             | 3.7575           | K.LPLQSQVGQYNQPEVPVR.S           | 1            | TCF20_HUMAN          |
| <b><i>Transcription factor A, mitochondrial precursor - Homo sapiens (Human)</i></b>  |               |                  |                                  |              |                      |
| Q00059                                                                                | 2             | 4.2256           | R.SAYNVYVAER.F                   | 1            | TFAM_HUMAN           |
| Q00059                                                                                | 2             | 3.6097           | R.AEWQVYKEEISR.F                 | 1            | TFAM_HUMAN           |
| Q00059                                                                                | 2             | 3.8473           | K.SWEEQMIEVGRK.D                 | 1            | TFAM_HUMAN           |
| Q00059                                                                                | 3             | 4.661            | K.NLSDSEKELYIQHAKEDETR.Y         | 2            | TFAM_HUMAN           |
| Q00059                                                                                | 2             | 4.4344           | K.SWEEQMIEVGR.K                  | 4            | TFAM_HUMAN           |
| Q00059                                                                                | 3             | 4.0541           | R.FKEQLTPSQIM#SLEK.E             | 1            | TFAM_HUMAN           |
| Q00059                                                                                | 2             | 3.831            | R.FKEQLTPSQIMSLEK.E              | 3            | TFAM_HUMAN           |
| Q00059                                                                                | 3             | 5.92             | R.FKEQLTPSQIMSLEKEIMDK.H         | 2            | TFAM_HUMAN           |
| Q00059                                                                                | 2             | 3.7299           | R.FQEAKGDSPQEK.L                 | 2            | TFAM_HUMAN           |
| Q00059                                                                                | 1             | 2.4061           | K.IYQDAYR.A                      | 2            | TFAM_HUMAN           |

| <i>Accession No*</i>                                                                   | <i>Charge</i> | <i>XC(Max)**</i> | <i>Peptide*</i>                   | <i>TC***</i> | <i>Reference No*</i> |
|----------------------------------------------------------------------------------------|---------------|------------------|-----------------------------------|--------------|----------------------|
| Q00059                                                                                 | 3             | 4.3758           | R.FKEQLTPSQIM#SLEKEIMDK.H         | 1            | TFAM_HUMAN           |
| Q00059                                                                                 | 2             | 4.3739           | K.NLSDSEKELYIQHAK.E               | 2            | TFAM_HUMAN           |
| <b><i>Transcription factor BTF3 - Homo sapiens (Human)</i></b>                         |               |                  |                                   |              |                      |
| P20290                                                                                 | 2             | 4.8997           | K.VQASLAANTFTITGHAETK.Q           | 4            | BTF3_HUMAN           |
| P20290                                                                                 | 2             | 3.4412           | R.TGAPAQADSR.G                    | 3            | BTF3_HUMAN           |
| P20290                                                                                 | 3             | 5.5107           | K.QLTEMLPSILNQLGADSLTSLR.R        | 1            | BTF3_HUMAN           |
| P20290                                                                                 | 3             | 5.8493           | K.QLTEM#LPSILNQLGADSLTSLR.R       | 1            | BTF3_HUMAN           |
| P20290                                                                                 | 4             | 7.3122           | K.KLGVNNSIGIEEVNMFTNQGTVIHFNNPK.V | 2            | BTF3_HUMAN           |
| <b><i>Transcription factor BTF3 homolog 2 - Homo sapiens (Human)</i></b>               |               |                  |                                   |              |                      |
| Q13891                                                                                 | 2             | 2.7353           | -.MKETIM#NQEK.L                   | 1            | BT3L2_HUMAN          |
| Q13891                                                                                 | 2             | 3.3909           | -.MKETIMNQEK.L                    | 2            | BT3L2_HUMAN          |
| <b><i>Transcription factor jun-D - Homo sapiens (Human)</i></b>                        |               |                  |                                   |              |                      |
| P17535                                                                                 | 2             | 3.999            | K.SQNTELASTASLLR.E                | 2            | JUND_HUMAN           |
| <b><i>Transcription factor SOX-11 - Homo sapiens (Human)</i></b>                       |               |                  |                                   |              |                      |
| P35716                                                                                 | 1             | 2.4037           | R.VSGSGGGGAGK.T                   | 1            | SOX11_HUMAN          |
| <b><i>Transcription initiation factor IIF subunit alpha - Homo sapiens (Human)</i></b> |               |                  |                                   |              |                      |
| P35269                                                                                 | 2             | 4.2014           | K.TGLSSEQTVNVLAQILK.R             | 2            | T2FA_HUMAN           |
| P35269                                                                                 | 2             | 4.2143           | R.LRLDTGPQSLSGK.S                 | 1            | T2FA_HUMAN           |
| P35269                                                                                 | 3             | 5.5405           | R.LKDQDQDEDEEEKEK.R               | 4            | T2FA_HUMAN           |
| P35269                                                                                 | 2             | 2.7683           | R.LDTGPQSLSGK.S                   | 1            | T2FA_HUMAN           |
| <b><i>Transcription initiation factor TFIID subunit 10 - Homo sapiens (Human)</i></b>  |               |                  |                                   |              |                      |
| Q12962                                                                                 | 2             | 5.7828           | K.ASPAGTAGGPGAGAAAGGTGPLAAR.A     | 3            | TAF10_HUMAN          |
| <b><i>Transcription intermediary factor 1-beta - Homo sapiens (Human)</i></b>          |               |                  |                                   |              |                      |
| Q13263                                                                                 | 2             | 3.2134           | K.DIVENYFMR.D                     | 2            | TIF1B_HUMAN          |
| Q13263                                                                                 | 3             | 3.9408           | R.VSLERLRLDLTADSQPPVFK.V          | 2            | TIF1B_HUMAN          |
| Q13263                                                                                 | 2             | 2.8755           | R.SGEGEVSGLMR.K                   | 3            | TIF1B_HUMAN          |
| Q13263                                                                                 | 1             | 2.5787           | R.MNEAFGDTK.F                     | 1            | TIF1B_HUMAN          |
| Q13263                                                                                 | 2             | 4.2005           | K.VFPGSTTEDYNLIVIER.G             | 8            | TIF1B_HUMAN          |
| Q13263                                                                                 | 3             | 4.2122           | K.LTEDKADVQSIIGLQR.F              | 1            | TIF1B_HUMAN          |
| Q13263                                                                                 | 2             | 3.6285           | K.LSPPYSSPQEFAQDVGR.M             | 4            | TIF1B_HUMAN          |
| Q13263                                                                                 | 2             | 3.3405           | K.ADVQSIIGLQR.F                   | 2            | TIF1B_HUMAN          |
| <b><i>Transcription regulator protein BACH1 - Homo sapiens (Human)</i></b>             |               |                  |                                   |              |                      |
| O14867                                                                                 | 2             | 3.1771           | K.DGSEQISQK.R                     | 2            | BACH1_HUMAN          |

*Accession No\* Charge XC(Max)\*\* Peptide\* TC\*\*\* Reference No\**

***Transcriptional activator protein Pur-alpha - Homo sapiens (Human)***

|        |   |        |                                 |   |            |
|--------|---|--------|---------------------------------|---|------------|
| Q00577 | 2 | 3.7567 | R.GPGLGSTQGQTIALPAQGLIEFR.D     | 2 | PURA_HUMAN |
| Q00577 | 2 | 2.7438 | R.FFFDVGSNK.Y                   | 1 | PURA_HUMAN |
| Q00577 | 3 | 5.8047 | K.LIDDYGVEEPAELPEGTSLSLTVDNKR.F | 2 | PURA_HUMAN |

***Transcriptional adapter 3-like - Homo sapiens (Human)***

|        |   |        |                  |   |             |
|--------|---|--------|------------------|---|-------------|
| O75528 | 2 | 2.7644 | K.ESGADGASTSPR.N | 1 | TAD3L_HUMAN |
|--------|---|--------|------------------|---|-------------|

***Transcriptional regulator ERG - Homo sapiens (Human)***

|        |   |       |                       |   |           |
|--------|---|-------|-----------------------|---|-----------|
| P11308 | 2 | 3.524 | K.TEM#TASSSSDYGQTSK.M | 2 | ERG_HUMAN |
|--------|---|-------|-----------------------|---|-----------|

***Transcriptional repressor p66 alpha - Homo sapiens (Human)***

|        |   |        |                     |   |            |
|--------|---|--------|---------------------|---|------------|
| Q86YP4 | 3 | 4.616  | R.ALERDPTEDDVESK.K  | 5 | P66A_HUMAN |
| Q86YP4 | 2 | 4.0518 | R.GLLASDLNTDGD MR.V | 1 | P66A_HUMAN |
| Q86YP4 | 2 | 2.8042 | R.DPTEDDVESK.K      | 1 | P66A_HUMAN |
| Q86YP4 | 2 | 2.979  | R.ATEATAM#AMGR.G    | 1 | P66A_HUMAN |

***Transcriptional repressor p66 beta - Homo sapiens (Human)***

|        |   |        |                        |   |            |
|--------|---|--------|------------------------|---|------------|
| Q8WXI9 | 3 | 4.3997 | K.LPSRPGAQGV EPQNL.R.T | 1 | P66B_HUMAN |
| Q8WXI9 | 2 | 3.6753 | R.VIAPNPAQLQGQR.G      | 2 | P66B_HUMAN |

***Transducin-like enhancer protein 3 - Homo sapiens (Human)***

|        |   |        |                         |   |            |
|--------|---|--------|-------------------------|---|------------|
| Q04726 | 2 | 4.8768 | K.DAPTSPASVASSSSTPSSK.T | 3 | TLE3_HUMAN |
| Q04726 | 2 | 3.1023 | R.NDAPTPGTSTTPGLR.S     | 3 | TLE3_HUMAN |

***Transformation/transcription domain-associated protein - Homo sapiens (Human)***

|        |   |        |                     |   |             |
|--------|---|--------|---------------------|---|-------------|
| Q9Y4A5 | 2 | 2.9553 | R.EKSILLVKMMTYIEK.R | 1 | TRRAP_HUMAN |
|--------|---|--------|---------------------|---|-------------|

***Transformer-2 protein homolog - Homo sapiens (Human)***

|        |   |       |                    |   |             |
|--------|---|-------|--------------------|---|-------------|
| Q13595 | 2 | 3.502 | R.YGPLSGVNVVYDQR.T | 2 | TRA2A_HUMAN |
|--------|---|-------|--------------------|---|-------------|

***Transforming acidic coiled-coil-containing protein 1 - Homo sapiens (Human)***

|        |   |        |                                  |   |             |
|--------|---|--------|----------------------------------|---|-------------|
| O75410 | 3 | 5.5599 | K.SPPDLKETPGLTSSDNDNSGVELGEESR.S | 2 | TACC1_HUMAN |
| O75410 | 2 | 3.0419 | K.SQESQEADEQLVAEVVEK.C           | 2 | TACC1_HUMAN |
| O75410 | 2 | 3.9878 | K.SAGLEQPTDPVAR.D                | 5 | TACC1_HUMAN |
| O75410 | 2 | 3.2451 | K.MEEDGSTVLGLLESSAEK.A           | 1 | TACC1_HUMAN |
| O75410 | 3 | 3.8969 | K.ETPGTLSSDNDNSGVELGEESR.S       | 1 | TACC1_HUMAN |
| O75410 | 2 | 3.4488 | K.AIGGEFSDTNAAVEGTPLPK.A         | 2 | TACC1_HUMAN |

***Transforming acidic coiled-coil-containing protein 2 - Homo sapiens (Human)***

|        |   |       |                                  |   |             |
|--------|---|-------|----------------------------------|---|-------------|
| O95359 | 3 | 4.177 | R.EHPSSSMPFAECPPEGCLASPAAPEDGPQT | 1 | TACC2_HUMAN |
|--------|---|-------|----------------------------------|---|-------------|



| <i>Accession No*</i> | <i>Charge</i> | <i>XC(Max)**</i> | <i>Peptide*</i> | <i>TC***</i> | <i>Reference No*</i> |
|----------------------|---------------|------------------|-----------------|--------------|----------------------|
|----------------------|---------------|------------------|-----------------|--------------|----------------------|

|        |   |        |                      |   |             |
|--------|---|--------|----------------------|---|-------------|
| O95359 | 2 | 3.2318 | R.GPEGSLLPSPPPSQER.E | 2 | TACC2_HUMAN |
|--------|---|--------|----------------------|---|-------------|

***Transforming growth factor beta-1-induced transcript 1 protein - Homo sapiens (Human)***

|        |   |        |                                    |   |             |
|--------|---|--------|------------------------------------|---|-------------|
| O43294 | 2 | 3.9009 | K.VASGEQKEDQSEDK.K                 | 3 | TGF11_HUMAN |
| O43294 | 2 | 3.2711 | R.LMASLSDFR.V                      | 2 | TGF11_HUMAN |
| O43294 | 3 | 4.1354 | R.VQNHLPASGPTQPPVVSSTNEGSPSPPEPTGK | 1 | TGF11_HUMAN |
| O43294 | 3 | 4.4013 | K.ASATSATLELDRLMASLSDFR.V          | 1 | TGF11_HUMAN |
| O43294 | 2 | 4.1242 | K.GSLDTMLGLLQSDLSR.R               | 3 | TGF11_HUMAN |

***Transgelin - Homo sapiens (Human)***

|        |   |        |                 |   |            |
|--------|---|--------|-----------------|---|------------|
| Q01995 | 2 | 3.4832 | R.EFTESQLQEGK.H | 2 | TAGL_HUMAN |
| Q01995 | 2 | 3.4147 | R.LGFQVWLK.N    | 3 | TAGL_HUMAN |

***Transgelin-2 - Homo sapiens (Human)***

|        |   |        |                        |    |             |
|--------|---|--------|------------------------|----|-------------|
| P37802 | 2 | 3.584  | R.GASQAGM#TGYGM#PR.Q   | 3  | TAGL2_HUMAN |
| P37802 | 2 | 4.1096 | K.NVIGLQMG TNR.G       | 4  | TAGL2_HUMAN |
| P37802 | 3 | 5.068  | R.YGINTTDIFQTVDLWEGK.N | 8  | TAGL2_HUMAN |
| P37802 | 2 | 3.259  | K.KIQASTM#AFK.Q        | 6  | TAGL2_HUMAN |
| P37802 | 2 | 4.5118 | R.TLMNLGGLAVAR.D       | 13 | TAGL2_HUMAN |
| P37802 | 2 | 3.8469 | R.NFSDNQLQEGK.N        | 3  | TAGL2_HUMAN |
| P37802 | 2 | 4.3906 | R.GASQAGMTGYGM#PR.Q    | 4  | TAGL2_HUMAN |
| P37802 | 2 | 3.4174 | R.GASQAGM#TGYGM#PR.Q   | 1  | TAGL2_HUMAN |
| P37802 | 2 | 3.6164 | R.DDGLFSGDPNWFPPK.S    | 3  | TAGL2_HUMAN |
| P37802 | 2 | 4.3756 | R.DDGLFSGDPNWFPPK.K    | 5  | TAGL2_HUMAN |
| P37802 | 2 | 4.9549 | K.QMEQISQFLQAAER.Y     | 8  | TAGL2_HUMAN |
| P37802 | 2 | 3.8378 | K.QM#EQISQFLQAAER.Y    | 4  | TAGL2_HUMAN |
| P37802 | 2 | 4.6618 | R.TLM#NLGGLAVAR.D      | 5  | TAGL2_HUMAN |
| P37802 | 2 | 3.0269 | K.NVIGLQMG TNR.G       | 2  | TAGL2_HUMAN |
| P37802 | 2 | 3.1335 | R.GASQAGMTGYGM#PR.Q    | 2  | TAGL2_HUMAN |

***Trans-Golgi network integral membrane protein 2 precursor - Homo sapiens (Human)***

|        |   |        |                          |   |             |
|--------|---|--------|--------------------------|---|-------------|
| O43493 | 2 | 4.812  | K.SGAEEQGPIDGPSK.S       | 4 | TGON2_HUMAN |
| O43493 | 2 | 4.4051 | K.SSAEAQTPEDTPNK.S       | 3 | TGON2_HUMAN |
| O43493 | 2 | 2.7042 | K.ADTNQLADK.G            | 1 | TGON2_HUMAN |
| O43493 | 2 | 3.9691 | K.SGAEDQTPKDVPNK.S       | 2 | TGON2_HUMAN |
| O43493 | 2 | 4.1988 | K.SGAEEQTSKDSPNK.V       | 2 | TGON2_HUMAN |
| O43493 | 3 | 5.1358 | K.DGSNKS GAEEQGPIDGPSK.S | 2 | TGON2_HUMAN |

***Transient receptor potential cation channel subfamily V member 4 - Homo sapiens (Human)***

| <i>Accession No*</i>                                                                            | <i>Charge</i> | <i>XC(Max)**</i> | <i>Peptide*</i>                  | <i>TC***</i> | <i>Reference No*</i> |
|-------------------------------------------------------------------------------------------------|---------------|------------------|----------------------------------|--------------|----------------------|
| Q9HBA0                                                                                          | 2             | 5.0614           | K.GVPNPIDLLESTLYESSVVPQPK.K      | 1            | TRPV4_HUMAN          |
| Q9HBA0                                                                                          | 2             | 3.1882           | K.NSNPDEVVVPLDSMGNPR.C           | 1            | TRPV4_HUMAN          |
| <b><i>Transitional endoplasmic reticulum ATPase - Homo sapiens (Human)</i></b>                  |               |                  |                                  |              |                      |
| P55072                                                                                          | 3             | 4.0815           | K.NAPAIIFIDELDAIAPK.R            | 1            | TERA_HUMAN           |
| P55072                                                                                          | 2             | 3.1004           | K.GPELLTM#WFGESEANVR.E           | 1            | TERA_HUMAN           |
| P55072                                                                                          | 2             | 3.1957           | K.MDELQLFR.G                     | 2            | TERA_HUMAN           |
| P55072                                                                                          | 2             | 4.5704           | R.WALSQSNPSALR.E                 | 3            | TERA_HUMAN           |
| <b><i>Translocated promoter region - Homo sapiens (Human)</i></b>                               |               |                  |                                  |              |                      |
| Q5SWY0                                                                                          | 2             | 3.614            | R.ELQELQDSLNAER.E                | 2            | Q5SWY0_HUMAN         |
| <b><i>Translocon-associated protein subunit alpha precursor - Homo sapiens (Human)</i></b>      |               |                  |                                  |              |                      |
| P43307                                                                                          | 2             | 3.0016           | K.GTEDFIVESLDASFR.Y              | 1            | SSRA_HUMAN           |
| <b><i>Transmembrane and coiled-coil domain-containing protein 4 - Homo sapiens (Human)</i></b>  |               |                  |                                  |              |                      |
| Q5TGY1                                                                                          | 3             | 4.2711           | R.QAAAAASSGETPHQVGGTQGPISGDTSK.L | 1            | Q5TGY1_HUMAN         |
| <b><i>Transmembrane emp24 domain-containing protein 10 precursor - Homo sapiens (Human)</i></b> |               |                  |                                  |              |                      |
| P49755                                                                                          | 2             | 4.1607           | R.IPDQLVILDMK.H                  | 3            | TMEDA_HUMAN          |
| <b><i>Transmembrane glycoprotein NMB precursor - Homo sapiens (Human)</i></b>                   |               |                  |                                  |              |                      |
| Q14956                                                                                          | 3             | 5.2242           | K.DVYVVTDQIPVFVTMFQK.N           | 2            | GPNMB_HUMAN          |
| <b><i>Transmembrane protein 126B - Homo sapiens (Human)</i></b>                                 |               |                  |                                  |              |                      |
| Q8IUX1                                                                                          | 2             | 3.9319           | R.DSGVVPVGTEEAPK.V               | 4            | T126B_HUMAN          |
| <b><i>Transmembrane protein 132E precursor - Homo sapiens (Human)</i></b>                       |               |                  |                                  |              |                      |
| Q6IEE7                                                                                          | 2             | 4.0859           | R.DQAEDPASSPTSK.R                | 4            | T132E_HUMAN          |
| Q6IEE7                                                                                          | 2             | 3.8649           | R.DQAEDPASSPTSKR.K               | 2            | T132E_HUMAN          |
| <b><i>Transmembrane protein 147 - Homo sapiens (Human)</i></b>                                  |               |                  |                                  |              |                      |
| Q9BVK8                                                                                          | 2             | 2.7007           | K.C*VQAGVTYLFVQLCK.M             | 1            | TM147_HUMAN          |
| <b><i>Transmembrane protein 166 - Homo sapiens (Human)</i></b>                                  |               |                  |                                  |              |                      |
| Q9H8M9                                                                                          | 2             | 4.0909           | K.NVFTSAEELER.A                  | 2            | TM166_HUMAN          |
| <b><i>Transmembrane protein 24 - Homo sapiens (Human)</i></b>                                   |               |                  |                                  |              |                      |
| O14523                                                                                          | 3             | 6.0481           | R.SDISERPSVDDIESETGSTGALETR.S    | 3            | TMM24_HUMAN          |
| <b><i>Transmembrane protein 51 - Homo sapiens (Human)</i></b>                                   |               |                  |                                  |              |                      |
| Q9NW97                                                                                          | 3             | 4.8842           | R.INLPDKNVPPPSIEPLTPPPQYDEVQEK.A | 3            | TMM51_HUMAN          |
| Q9NW97                                                                                          | 2             | 3.6068           | R.ADVEASPGNPPDR.Q                | 3            | TMM51_HUMAN          |

| <i>Accession No*</i>                                                            | <i>Charge</i> | <i>XC(Max)**</i> | <i>Peptide*</i>                      | <i>TC***</i> | <i>Reference No*</i> |
|---------------------------------------------------------------------------------|---------------|------------------|--------------------------------------|--------------|----------------------|
| <b><i>Transmembrane protein 81 precursor - Homo sapiens (Human)</i></b>         |               |                  |                                      |              |                      |
| Q6P7N7                                                                          | 1             | 2.5663           | R.C*DVQLVK.N                         | 1            | TMM81_HUMAN          |
| <b><i>Transmembrane protein Clorf75 - Homo sapiens (Human)</i></b>              |               |                  |                                      |              |                      |
| Q9H813                                                                          | 3             | 3.9228           | R.STSYQELSEELVQVVENSELADEQDKETVR.V   | 1            | CA075_HUMAN          |
| <b><i>Transmembrane protein Clorf78 - Homo sapiens (Human)</i></b>              |               |                  |                                      |              |                      |
| Q9NVM1                                                                          | 2             | 3.4091           | R.SSTLEPEDDDEDEEDTVTR.L              | 1            | CA078_HUMAN          |
| <b><i>Transthyretin precursor - Homo sapiens (Human)</i></b>                    |               |                  |                                      |              |                      |
| P02766                                                                          | 2             | 6.4238           | R.RYTIAALLSPYSYSTTAVVTNPK.E          | 4            | TTHY_HUMAN           |
| P02766                                                                          | 4             | 6.9099           | K.TSESGELHGLTTEEEFVEGIYKVEIDTKSYWK.A | 1            | TTHY_HUMAN           |
| P02766                                                                          | 1             | 3.6778           | K.AADDTWEPFASGK.T                    | 8            | TTHY_HUMAN           |
| P02766                                                                          | 4             | 5.7433           | K.AADDTWEPFASGKTSSESGELHGLTTEEEFVEG  | 2            | TTHY_HUMAN           |
| P02766                                                                          | 3             | 6.0427           | K.ALGISPFHEHAENVFTANDSGPR.R          | 22           | TTHY_HUMAN           |
| P02766                                                                          | 3             | 7.1092           | K.TSESGELHGLTTEEEFVEGIYK.V           | 8            | TTHY_HUMAN           |
| P02766                                                                          | 1             | 2.1163           | K.VEIDTK.S                           | 1            | TTHY_HUMAN           |
| P02766                                                                          | 3             | 6.4155           | K.VLDAVRGSPAINVAVHVFR.K              | 13           | TTHY_HUMAN           |
| P02766                                                                          | 3             | 5.6412           | K.VLDAVRGSPAINVAVHVFRK.A             | 3            | TTHY_HUMAN           |
| P02766                                                                          | 2             | 4.7315           | R.KAADDTWEPFASGK.T                   | 7            | TTHY_HUMAN           |
| P02766                                                                          | 3             | 4.3201           | R.RYTIAALLSPYSYSTTAVVTNPK.E.-        | 3            | TTHY_HUMAN           |
| P02766                                                                          | 2             | 4.9585           | R.YTIAALLSPYSYSTTAVVTNPK.E           | 12           | TTHY_HUMAN           |
| P02766                                                                          | 3             | 5.0291           | R.YTIAALLSPYSYSTTAVVTNPK.E.-         | 5            | TTHY_HUMAN           |
| P02766                                                                          | 2             | 5.0084           | R.GSPAINVAVHVFRK.A                   | 4            | TTHY_HUMAN           |
| P02766                                                                          | 2             | 4.6234           | R.GSPAINVAVHVFR.K                    | 9            | TTHY_HUMAN           |
| <b><i>Treacle protein - Homo sapiens (Human)</i></b>                            |               |                  |                                      |              |                      |
| Q13428                                                                          | 2             | 2.716            | K.ASEAQPVAR.T                        | 1            | TCOF_HUMAN           |
| <b><i>TRIM65 protein - Homo sapiens (Human)</i></b>                             |               |                  |                                      |              |                      |
| Q96DX1                                                                          | 2             | 3.5071           | -.M#CPELPGRAPLLGGARVR.P              | 1            | Q96DX1_HUMAN         |
| <b><i>Trinucleotide repeat containing 5 - Homo sapiens (Human)</i></b>          |               |                  |                                      |              |                      |
| Q9BT09                                                                          | 3             | 5.045            | K.ELGGLEGDPSPPEEDEIQK.A              | 2            | Q9BT09_HUMAN         |
| <b><i>Trinucleotide repeat-containing 6B protein - Homo sapiens (Human)</i></b> |               |                  |                                      |              |                      |
| Q9UPQ9                                                                          | 2             | 3.633            | K.DM#GTTDSGPYFEK.G                   | 3            | TNC6B_HUMAN          |
| Q9UPQ9                                                                          | 3             | 4.6823           | K.DTESSSENTTDNNSASNPGSEK.S           | 3            | TNC6B_HUMAN          |
| Q9UPQ9                                                                          | 2             | 3.5184           | K.IGEWSPNQPNSTGAWDNQK.G              | 1            | TNC6B_HUMAN          |
| Q9UPQ9                                                                          | 2             | 2.7057           | K.TGSGVGSWGAAR.G                     | 1            | TNC6B_HUMAN          |

| <i>Accession No*</i>                                                                 | <i>Charge</i> | <i>XC(Max)**</i> | <i>Peptide*</i>                 | <i>TC***</i> | <i>Reference No*</i> |
|--------------------------------------------------------------------------------------|---------------|------------------|---------------------------------|--------------|----------------------|
| Q9UPQ9                                                                               | 3             | 4.0134           | R.KGALETDNSNSSAQVSTVGQTSR.E     | 2            | TNC6B_HUMAN          |
| Q9UPQ9                                                                               | 2             | 3.0487           | R.STDAPSQSTGDR.K                | 1            | TNC6B_HUMAN          |
| Q9UPQ9                                                                               | 2             | 3.2363           | R.STDAPSQSTGDRK.T               | 1            | TNC6B_HUMAN          |
| Q9UPQ9                                                                               | 2             | 4.0842           | R.VLSNTGWGQTQIK.Q               | 1            | TNC6B_HUMAN          |
| Q9UPQ9                                                                               | 2             | 3.2452           | K.DMGTTDSGPYFEK.G               | 2            | TNC6B_HUMAN          |
| <b><i>Trinucleotide repeat-containing gene 6A protein - Homo sapiens (Human)</i></b> |               |                  |                                 |              |                      |
| Q8NDV7                                                                               | 2             | 2.8702           | R.DSPEENVQSNK.M                 | 1            | TNR6A_HUMAN          |
| <b><i>Trinucleotide repeat-containing gene 6C protein - Homo sapiens (Human)</i></b> |               |                  |                                 |              |                      |
| Q9HCJ0                                                                               | 2             | 3.4522           | R.VLSNTGWGQTPVK.Q               | 1            | TNR6C_HUMAN          |
| <b><i>TRIO and F-actin-binding protein - Homo sapiens (Human)</i></b>                |               |                  |                                 |              |                      |
| Q9H2D6                                                                               | 2             | 3.108            | R.GLGAPLTEDQQNR.L               | 2            | TARA_HUMAN           |
| Q9H2D6                                                                               | 2             | 2.8735           | R.TPEVPAGEGPR.R                 | 2            | TARA_HUMAN           |
| Q9H2D6                                                                               | 2             | 3.0922           | R.AGSEVISR.G                    | 3            | TARA_HUMAN           |
| <b><i>Triosephosphate isomerase - Homo sapiens (Human)</i></b>                       |               |                  |                                 |              |                      |
| P60174                                                                               | 2             | 4.2248           | K.TATPQQAQEVHEK.L               | 9            | TPIS_HUMAN           |
| P60174                                                                               | 2             | 4.9521           | K.QSLGELIGTLNAAK.V              | 5            | TPIS_HUMAN           |
| P60174                                                                               | 2             | 5.4753           | R.KQSLGELIGTLNAAK.V             | 3            | TPIS_HUMAN           |
| <b><i>TRIP12 protein - Homo sapiens (Human)</i></b>                                  |               |                  |                                 |              |                      |
| Q14CA3                                                                               | 2             | 3.8672           | R.NTAGAQPQDDSIGGR.S             | 3            | Q14CA3_HUMAN         |
| Q14CA3                                                                               | 2             | 3.1413           | R.HLDQEQQLK.S                   | 2            | Q14CA3_HUMAN         |
| <b><i>Tripartite motif-containing protein 25 - Homo sapiens (Human)</i></b>          |               |                  |                                 |              |                      |
| Q14258                                                                               | 2             | 4.3539           | K.LPTFGAPEQLVDLK.Q              | 2            | TRI25_HUMAN          |
| <b><i>Tripartite motif-containing protein 65 - Homo sapiens (Human)</i></b>          |               |                  |                                 |              |                      |
| Q6PJ69                                                                               | 2             | 3.7605           | R.DPGPDPGPGPDPAAR.C             | 2            | TRI65_HUMAN          |
| <b><i>Tripeptidyl-peptidase 1 precursor - Homo sapiens (Human)</i></b>               |               |                  |                                 |              |                      |
| O14773                                                                               | 3             | 5.6439           | R.VPIPVWSGTSASTPVFGGILSLINEHR.I | 1            | TPP1_HUMAN           |
| O14773                                                                               | 3             | 4.0746           | R.LYQQHGAGLFDVTR.G              | 1            | TPP1_HUMAN           |
| <b><i>Triple functional domain protein - Homo sapiens (Human)</i></b>                |               |                  |                                 |              |                      |
| O75962                                                                               | 3             | 3.7813           | K.SADAGSQKSDSDSAATPQDETVEER.G   | 1            | TRIO_HUMAN           |
| <b><i>tRNA-dihydrouridine synthase 3-like - Homo sapiens (Human)</i></b>             |               |                  |                                 |              |                      |
| Q96G46                                                                               | 2             | 4.2446           | R.ETEVDGPAGNELAEPEAK.R          | 1            | DUS3L_HUMAN          |
| Q96G46                                                                               | 3             | 4.3839           | R.IRLEDGQTADGQTEEAEPGEQLQTQK.R  | 1            | DUS3L_HUMAN          |

Accession No\* Charge XC(Max)\*\* Peptide\* TC\*\*\* Reference No\*

***Trophoblast glycoprotein precursor - Homo sapiens (Human)***

Q13641 2 2.9357 R.NLFLTGNQLAVLPAGAFAR.R 1 TPBG\_HUMAN

***Tropomodulin-2 - Homo sapiens (Human)***

Q9NZR1 3 5.0579 K.VKPVFEEPPNPTNVEISLQQMK.A 1 TMOD2\_HUMAN

***Tropomodulin-3 - Homo sapiens (Human)***

Q9NYL9 3 5.0935 R.SNDPVATAFAEMLK.V 5 TMOD3\_HUMAN

Q9NYL9 3 5.6923 R.TKENDAHLVEVNLNNIK.N 4 TMOD3\_HUMAN

Q9NYL9 2 3.3718 R.QQLGTAVELEMAK.M 2 TMOD3\_HUMAN

Q9NYL9 3 5.8114 K.YKDLDEDELLGNLSETELK.Q 2 TMOD3\_HUMAN

Q9NYL9 2 3.8177 K.STTGPFDRHLLSYLEK.E 4 TMOD3\_HUMAN

Q9NYL9 2 3.4118 K.MLEENTNILK.F 3 TMOD3\_HUMAN

Q9NYL9 2 4.4523 K.FGYQFTQQGPR.T 8 TMOD3\_HUMAN

Q9NYL9 2 3.6443 K.ENDAHLVEVNLNNIK.N 2 TMOD3\_HUMAN

Q9NYL9 2 4.0775 K.DREDYVPYTGEK.K 2 TMOD3\_HUMAN

Q9NYL9 2 3.9482 R.SNDPVATAFAEM#LK.V 2 TMOD3\_HUMAN

Q9NYL9 3 3.9184 K.EALEHKDREDYVPYTGEK.K 1 TMOD3\_HUMAN

***Tropomyosin 1 alpha variant 6 - Homo sapiens (Human)***

Q1ZYL5 2 4.7712 R.KLRETAEADVASLNR.R 5 Q1ZYL5\_HUMAN

Q1ZYL5 2 4.4853 R.ETAEDVASLNR.R 8 Q1ZYL5\_HUMAN

Q1ZYL5 2 4.871 R.SLQEQAADAAEER.A 13 Q1ZYL5\_HUMAN

Q1ZYL5 2 5.4298 K.LRETAEADVASLNR.R 9 Q1ZYL5\_HUMAN

***Tropomyosin 2 - Homo sapiens (Human)***

Q5TCU3 3 4.4366 K.EENVEIHQTLDTLLELNNL.- 3 Q5TCU3\_HUMAN

Q5TCU3 2 3.8122 K.TIDDLEETLASAK.E 3 Q5TCU3\_HUMAN

***Tropomyosin alpha-4 chain - Homo sapiens (Human)***

P67936 3 4.0478 K.IQALQQQAEDAEDRAQGLQR.E 4 TPM4\_HUMAN

P67936 2 3.6691 K.LVILEGELERAEEER.A 5 TPM4\_HUMAN

P67936 2 2.8293 R.EKAEGDVAALNRR.I 1 TPM4\_HUMAN

P67936 2 4.324 R.KLVILEGELERAEEER.A 3 TPM4\_HUMAN

P67936 2 5.1013 R.KIQALQQQAEDAEDRAQGLQR.E 5 TPM4\_HUMAN

P67936 2 5.9876 R.KIQALQQQAEDAEDR.A 13 TPM4\_HUMAN

P67936 1 2.1115 R.TVAKLEK.T 1 TPM4\_HUMAN

P67936 2 5.351 K.IQALQQQAEDAEDR.A 12 TPM4\_HUMAN

P67936 1 3.2647 K.TIDDLEEK.L 10 TPM4\_HUMAN

| <i>Accession No*</i>                                                           | <i>Charge</i> | <i>XC(Max)**</i> | <i>Peptide*</i>                | <i>TC***</i> | <i>Reference No*</i> |
|--------------------------------------------------------------------------------|---------------|------------------|--------------------------------|--------------|----------------------|
| P67936                                                                         | 2             | 4.1849           | R.EKAEGDVAALNR.R               | 7            | TPM4_HUMAN           |
| P67936                                                                         | 2             | 3.7774           | K.LLSDKLKEAETR.A               | 2            | TPM4_HUMAN           |
| P67936                                                                         | 2             | 3.2715           | K.SLEAASEK.Y                   | 24           | TPM4_HUMAN           |
| P67936                                                                         | 2             | 5.0027           | K.TIDDLEEKLAQAK.E              | 6            | TPM4_HUMAN           |
| P67936                                                                         | 3             | 4.8856           | K.YSEKEDKYEEEIK.L              | 7            | TPM4_HUMAN           |
| P67936                                                                         | 3             | 4.1351           | R.AEERAEVSELK.C                | 3            | TPM4_HUMAN           |
| P67936                                                                         | 2             | 4.0909           | K.AEGDVAALNR.R                 | 7            | TPM4_HUMAN           |
| <b><i>Tropomyosin beta chain - Homo sapiens (Human)</i></b>                    |               |                  |                                |              |                      |
| P07951                                                                         | 2             | 4.2564           | K.TIDDLEDEVYAQK.M              | 4            | TPM2_HUMAN           |
| <b><i>Tryptophanyl-tRNA synthetase, cytoplasmic - Homo sapiens (Human)</i></b> |               |                  |                                |              |                      |
| P23381                                                                         | 2             | 4.5773           | K.AGNASKDEIDSAVK.M             | 2            | SYWC_HUMAN           |
| <b><i>TSC22 domain family protein 1 - Homo sapiens (Human)</i></b>             |               |                  |                                |              |                      |
| Q15714                                                                         | 3             | 4.0373           | R.LDNSSSGASVVAIDNKIEQAMDLVK.S  | 2            | T22D1_HUMAN          |
| <b><i>TSC22 domain family protein 2 - Homo sapiens (Human)</i></b>             |               |                  |                                |              |                      |
| O75157                                                                         | 2             | 3.4353           | R.HSSTFDQTAER.D                | 6            | T22D2_HUMAN          |
| <b><i>TSC22 domain family protein 4 - Homo sapiens (Human)</i></b>             |               |                  |                                |              |                      |
| Q9Y3Q8                                                                         | 2             | 4.4461           | R.NAALEQENGLLR.A               | 3            | T22D4_HUMAN          |
| Q9Y3Q8                                                                         | 2             | 3.6836           | R.VEAEAGGSGAR.T                | 4            | T22D4_HUMAN          |
| Q9Y3Q8                                                                         | 2             | 4.7652           | R.ALASPEQLAQLPSSGVPR.L         | 1            | T22D4_HUMAN          |
| <b><i>Tuberin - Homo sapiens (Human)</i></b>                                   |               |                  |                                |              |                      |
| P49815                                                                         | 3             | 4.8969           | R.VVSSEGGRRPSVDLSFQPSQPLSK.S   | 3            | TSC2_HUMAN           |
| P49815                                                                         | 2             | 4.3908           | R.SQSGTLDGESAAWSASGEDSR.G      | 2            | TSC2_HUMAN           |
| <b><i>Tubulin alpha-4A chain - Homo sapiens (Human)</i></b>                    |               |                  |                                |              |                      |
| P68366                                                                         | 2             | 4.2947           | R.AVFVDLEPTVIDEIR.N            | 6            | TBA4A_HUMAN          |
| <b><i>Tubulin beta chain - Homo sapiens (Human)</i></b>                        |               |                  |                                |              |                      |
| P07437                                                                         | 3             | 4.5135           | K.FWEVISDEHGIDPTGTYHGSDQLQDR.I | 1            | TBB5_HUMAN           |
| <b><i>Tubulin beta-2A chain - Homo sapiens (Human)</i></b>                     |               |                  |                                |              |                      |
| Q13885                                                                         | 2             | 3.8155           | R.INVYYNEAAGNK.Y               | 1            | TBB2A_HUMAN          |
| <b><i>Tubulin beta-2C chain - Homo sapiens (Human)</i></b>                     |               |                  |                                |              |                      |
| P68371                                                                         | 2             | 4.4977           | R.INVYYNEATGGK.Y               | 10           | TBB2C_HUMAN          |
| <b><i>Tubulin folding cofactor B - Homo sapiens (Human)</i></b>                |               |                  |                                |              |                      |
| Q99426                                                                         | 2             | 2.9493           | K.AQASSIPVGSRC                 | 1            | TBCB_HUMAN           |

| <i>Accession No*</i>                                                                                | <i>Charge</i> | <i>XC(Max)**</i> | <i>Peptide*</i>           | <i>TC***</i> | <i>Reference No*</i> |
|-----------------------------------------------------------------------------------------------------|---------------|------------------|---------------------------|--------------|----------------------|
| Q99426                                                                                              | 2             | 3.2091           | R.AQQEAEAAQR.L            | 3            | TBCB_HUMAN           |
| <b><i>Tubulin polymerization-promoting protein family member 3 - Homo sapiens (Human)</i></b>       |               |                  |                           |              |                      |
| Q9BW30                                                                                              | 2             | 3.3913           | R.VINYEEFK.A              | 4            | TPPP3_HUMAN          |
| Q9BW30                                                                                              | 2             | 4.0347           | K.SVTGTDVDIVFSK.V         | 4            | TPPP3_HUMAN          |
| Q9BW30                                                                                              | 2             | 3.0474           | K.ALEELATKR.F             | 2            | TPPP3_HUMAN          |
| Q9BW30                                                                                              | 2             | 4.7707           | R.QDILDDSGYVSAYK.N        | 4            | TPPP3_HUMAN          |
| Q9BW30                                                                                              | 3             | 5.6708           | K.GIAGRQDILDDSGYVSAYK.N   | 7            | TPPP3_HUMAN          |
| <b><i>Tubulin-specific chaperone A - Homo sapiens (Human)</i></b>                                   |               |                  |                           |              |                      |
| O75347                                                                                              | 3             | 5.3057           | K.MRAEDGENYDIKK.Q         | 9            | TBCA_HUMAN           |
| O75347                                                                                              | 3             | 6.4253           | R.ILENEKDLEEAEYKEAR.L     | 14           | TBCA_HUMAN           |
| O75347                                                                                              | 3             | 3.781            | K.KQAEILQESR.M            | 5            | TBCA_HUMAN           |
| O75347                                                                                              | 2             | 4.3411           | R.LEAAYLDLQR.I            | 4            | TBCA_HUMAN           |
| O75347                                                                                              | 2             | 4.2089           | R.ILENEKDLEEAEYK.E        | 3            | TBCA_HUMAN           |
| O75347                                                                                              | 2             | 3.5388           | K.DLEEAEYKEAR.L           | 2            | TBCA_HUMAN           |
| O75347                                                                                              | 2             | 3.1078           | R.AEDGENYDIKK.Q           | 3            | TBCA_HUMAN           |
| O75347                                                                                              | 3             | 4.1998           | K.M#RAEDGENYDIKK.Q        | 2            | TBCA_HUMAN           |
| O75347                                                                                              | 2             | 4.2542           | R.RLEAAYLDLQR.I           | 15           | TBCA_HUMAN           |
| O75347                                                                                              | 2             | 2.7296           | K.M#RAEDGENYDIK.K         | 1            | TBCA_HUMAN           |
| O75347                                                                                              | 2             | 2.9226           | R.LVLDSVKLEA.-            | 6            | TBCA_HUMAN           |
| O75347                                                                                              | 1             | 2.6159           | K.EKVMYEK.E               | 2            | TBCA_HUMAN           |
| O75347                                                                                              | 2             | 3.6326           | K.MRAEDGENYDIK.K          | 2            | TBCA_HUMAN           |
| <b><i>Tubulin-specific chaperone E - Homo sapiens (Human)</i></b>                                   |               |                  |                           |              |                      |
| Q15813                                                                                              | 2             | 3.1937           | K.VNFGTDFLTAIK.N          | 2            | TBCE_HUMAN           |
| Q15813                                                                                              | 3             | 3.8596           | R.RVEVNGEHATVR.F          | 1            | TBCE_HUMAN           |
| Q15813                                                                                              | 2             | 3.6261           | K.VPVSLLLLSYESPK.K        | 2            | TBCE_HUMAN           |
| <b><i>Tudor domain-containing protein 3 - Homo sapiens (Human)</i></b>                              |               |                  |                           |              |                      |
| Q9H7E2                                                                                              | 2             | 3.2349           | K.MGTLNVEEPK.S            | 2            | TDRD3_HUMAN          |
| <b><i>Tumor necrosis factor receptor superfamily member 16 precursor - Homo sapiens (Human)</i></b> |               |                  |                           |              |                      |
| P08138                                                                                              | 2             | 3.1474           | K.LLNGSAGDTWR.H           | 1            | TNR16_HUMAN          |
| <b><i>Tumor necrosis factor receptor superfamily member 21 precursor - Homo sapiens (Human)</i></b> |               |                  |                           |              |                      |
| O75509                                                                                              | 2             | 2.8983           | -.M#GTSPSSSTALASC*SRIAR.R | 1            | TNR21_HUMAN          |
| <b><i>Tumor protein D53 - Homo sapiens (Human)</i></b>                                              |               |                  |                           |              |                      |
| Q16890                                                                                              | 2             | 3.1538           | K.SFEERVETTSLK.T          | 1            | TPD53_HUMAN          |

Accession No\* Charge XC(Max)\*\* Peptide\* TC\*\*\* Reference No\*

***Tumor suppressor p53-binding protein 1 - Homo sapiens (Human)***

|        |   |        |                                     |   |             |
|--------|---|--------|-------------------------------------|---|-------------|
| Q12888 | 2 | 3.762  | K.TSNSLTEDSK.M                      | 3 | TP53B_HUMAN |
| Q12888 | 3 | 4.1579 | R.QSQQPMKPISPVKDPVSPASQK.M          | 1 | TP53B_HUMAN |
| Q12888 | 2 | 4.119  | K.SPEPEVLSTQEDLFDQSNK.T             | 2 | TP53B_HUMAN |
| Q12888 | 2 | 3.6237 | R.VITDVYYVDGTEVER.K                 | 2 | TP53B_HUMAN |
| Q12888 | 3 | 6.2389 | R.LSDVDANTAIKHEEQSNEDIPIAEQSSK.D    | 2 | TP53B_HUMAN |
| Q12888 | 2 | 4.356  | K.TSGTEPADFALPSSR.G                 | 1 | TP53B_HUMAN |
| Q12888 | 2 | 2.7438 | K.QDATVQTER.G                       | 2 | TP53B_HUMAN |
| Q12888 | 2 | 3.7478 | K.LMLSTSEYSQSPK.M                   | 1 | TP53B_HUMAN |
| Q12888 | 3 | 5.9092 | R.KVTEETEEPIVECQECETEVSPSQTTGGSSGDL | 3 | TP53B_HUMAN |
| Q12888 | 3 | 3.9516 | R.ADDPLRLDQELQQPQTQEK.T             | 1 | TP53B_HUMAN |

***Twisted gastrulation protein homolog 1 precursor - Homo sapiens (Human)***

|        |   |        |                     |   |             |
|--------|---|--------|---------------------|---|-------------|
| Q9GZX9 | 2 | 4.1455 | K.STVEELHEPIPSLFR.A | 1 | TWSG1_HUMAN |
|--------|---|--------|---------------------|---|-------------|

***Type-1 angiotensin II receptor-associated protein - Homo sapiens (Human)***

|        |   |        |                           |   |             |
|--------|---|--------|---------------------------|---|-------------|
| Q6RW13 | 2 | 2.8828 | R.SAYQTIDSAEAPADPFVPEGR.S | 1 | ATRAP_HUMAN |
|--------|---|--------|---------------------------|---|-------------|

***Tyrosine-protein kinase Sgk269 - Homo sapiens (Human)***

|        |   |        |                       |   |             |
|--------|---|--------|-----------------------|---|-------------|
| Q9H792 | 2 | 3.3141 | K.GAVDDAIAFGGK.T      | 1 | SG269_HUMAN |
| Q9H792 | 2 | 2.9234 | R.TDQAAVM#EK.G        | 1 | SG269_HUMAN |
| Q9H792 | 2 | 3.6164 | K.TDQEAPNASQTPPPLPK.K | 1 | SG269_HUMAN |

***Tyrosine-protein phosphatase non-receptor type 1 - Homo sapiens (Human)***

|        |   |        |                          |   |            |
|--------|---|--------|--------------------------|---|------------|
| P18031 | 2 | 2.9688 | K.GSPLNAAPYGIEMSQDTEVR.S | 2 | PTN1_HUMAN |
|--------|---|--------|--------------------------|---|------------|

***Tyrosine-protein phosphatase non-receptor type 11 - Homo sapiens (Human)***

|        |   |        |                     |   |             |
|--------|---|--------|---------------------|---|-------------|
| Q06124 | 2 | 3.2432 | R.VYENVGLMQQK.S     | 2 | PTN11_HUMAN |
| Q06124 | 2 | 3.074  | K.IQNTGDYYDLYGGEK.F | 1 | PTN11_HUMAN |
| Q06124 | 2 | 4.4931 | R.VYENVGLM#QQQK.S   | 1 | PTN11_HUMAN |

***Tyrosine-protein phosphatase non-receptor type 12 - Homo sapiens (Human)***

|        |   |        |                        |   |             |
|--------|---|--------|------------------------|---|-------------|
| Q05209 | 2 | 4.7264 | R.EQISENPTEATDIGFGNR.C | 3 | PTN12_HUMAN |
| Q05209 | 2 | 3.6634 | R.SEWSELQSQR.S         | 2 | PTN12_HUMAN |
| Q05209 | 3 | 4.155  | K.STELPGKNESTIEQIDK.K  | 1 | PTN12_HUMAN |
| Q05209 | 3 | 4.5936 | R.TPESFVLASEHNTVPR.S   | 2 | PTN12_HUMAN |

***Tyrosine-protein phosphatase non-receptor type 13 - Homo sapiens (Human)***

|        |   |        |                  |   |             |
|--------|---|--------|------------------|---|-------------|
| Q12923 | 2 | 2.7649 | K.GLSQQEVISALR.G | 1 | PTN13_HUMAN |
|--------|---|--------|------------------|---|-------------|

***Tyrosine-protein phosphatase non-receptor type 23 - Homo sapiens (Human)***



| <i>Accession No*</i>                                                                        | <i>Charge</i> | <i>XC(Max)**</i> | <i>Peptide*</i>                 | <i>TC***</i> | <i>Reference No*</i> |
|---------------------------------------------------------------------------------------------|---------------|------------------|---------------------------------|--------------|----------------------|
| Q9H3S7                                                                                      | 2             | 2.7664           | K.KYDQLK.V                      | 1            | PTN23_HUMAN          |
| <b><i>U1 small nuclear ribonucleoprotein 70 kDa - Homo sapiens (Human)</i></b>              |               |                  |                                 |              |                      |
| P08621                                                                                      | 2             | 3.3487           | R.RGGADVNIH.H                   | 2            | RU17_HUMAN           |
| P08621                                                                                      | 2             | 4.581            | R.GGGGGQDNGLEGLGNSDR.D          | 3            | RU17_HUMAN           |
| P08621                                                                                      | 2             | 3.0923           | R.RQQEVETELK.M                  | 2            | RU17_HUMAN           |
| P08621                                                                                      | 2             | 2.8574           | R.RLGGGLGGTR.R                  | 1            | RU17_HUMAN           |
| <b><i>U1 small nuclear ribonucleoprotein A - Homo sapiens (Human)</i></b>                   |               |                  |                                 |              |                      |
| P09012                                                                                      | 3             | 5.6622           | R.LVPGRHDIAFVEFDNEVQAGAAR.D     | 2            | SNRPA_HUMAN          |
| <b><i>U2 small nuclear ribonucleoprotein A' - Homo sapiens (Human)</i></b>                  |               |                  |                                 |              |                      |
| P09661                                                                                      | 2             | 3.8907           | K.KGGPSPGDVEAIK.N               | 2            | RU2A_HUMAN           |
| P09661                                                                                      | 2             | 2.9281           | K.GGPSPGDVEAIK.N                | 1            | RU2A_HUMAN           |
| P09661                                                                                      | 3             | 5.4176           | K.GGPSPGDVEAIKNAIANASTLAEVER.L  | 3            | RU2A_HUMAN           |
| <b><i>U2 small nuclear ribonucleoprotein B'' - Homo sapiens (Human)</i></b>                 |               |                  |                                 |              |                      |
| P08579                                                                                      | 2             | 3.4877           | K.TVEQTATTTNK.K                 | 4            | RU2B_HUMAN           |
| <b><i>U2-associated protein SR140 - Homo sapiens (Human)</i></b>                            |               |                  |                                 |              |                      |
| O15042                                                                                      | 3             | 5.2741           | R.SSDVHSSGSSDAHM#DASGPSDSMPSR.T | 1            | SR140_HUMAN          |
| O15042                                                                                      | 3             | 5.5947           | R.SSDVHSSGSSDAHMDASGPSDSMPSR.T  | 1            | SR140_HUMAN          |
| <b><i>U3 small nucleolar RNA-associated protein 14 homolog A - Homo sapiens (Human)</i></b> |               |                  |                                 |              |                      |
| Q9BVJ6                                                                                      | 2             | 3.7367           | K.DSGSQEVLSEL.R.V               | 1            | UT14A_HUMAN          |
| Q9BVJ6                                                                                      | 2             | 4.0852           | K.LVLADLLEPVK.T                 | 4            | UT14A_HUMAN          |
| <b><i>U4/U6 small nuclear ribonucleoprotein Prp3 - Homo sapiens (Human)</i></b>             |               |                  |                                 |              |                      |
| O43395                                                                                      | 2             | 2.9148           | R.KAAELQAR.I                    | 1            | PRPF3_HUMAN          |
| <b><i>U4/U6 small nuclear ribonucleoprotein Prp31 - Homo sapiens (Human)</i></b>            |               |                  |                                 |              |                      |
| Q8WWY3                                                                                      | 2             | 3.3201           | K.YFSSMAEFLK.V                  | 2            | PRP31_HUMAN          |
| <b><i>U4/U6 small nuclear ribonucleoprotein Prp4 - Homo sapiens (Human)</i></b>             |               |                  |                                 |              |                      |
| O43172                                                                                      | 2             | 2.9366           | K.TKAPDDL VAPVVK.K              | 1            | PRP4_HUMAN           |
| <b><i>U4/U6.U5 tri-snRNP-associated protein 1 - Homo sapiens (Human)</i></b>                |               |                  |                                 |              |                      |
| O43290                                                                                      | 2             | 4.7746           | K.TLGEDDPWLDDTAAWIER.S          | 2            | SNUT1_HUMAN          |
| O43290                                                                                      | 2             | 4.059            | K.RDDGYEAAASSK.T                | 2            | SNUT1_HUMAN          |
| O43290                                                                                      | 2             | 3.1917           | K.EAAGTTAAAGTGGATEQPPR.H        | 1            | SNUT1_HUMAN          |
| O43290                                                                                      | 3             | 3.8962           | K.LGLKPLEVNAIK.K                | 2            | SNUT1_HUMAN          |
| O43290                                                                                      | 2             | 3.511            | R.LRQLQLQLR.D                   | 1            | SNUT1_HUMAN          |

| <i>Accession No*</i> | <i>Charge</i> | <i>XC(Max)**</i> | <i>Peptide*</i>           | <i>TC***</i> | <i>Reference No*</i> |
|----------------------|---------------|------------------|---------------------------|--------------|----------------------|
| O43290               | 2             | 3.0408           | R.DDGYEAAASSK.T           | 2            | SNUT1_HUMAN          |
| O43290               | 3             | 4.0625           | R.VSEVEEEKEPVPQPLPSDDTR.V | 2            | SNUT1_HUMAN          |
| O43290               | 2             | 2.8835           | R.QLQQLQQLR.D             | 1            | SNUT1_HUMAN          |
| O43290               | 2             | 4.1484           | R.LQAQSLSTVGPR.L          | 4            | SNUT1_HUMAN          |
| O43290               | 2             | 3.8885           | K.MSSSDTPLGTVALLQEK.Q     | 2            | SNUT1_HUMAN          |
| O43290               | 2             | 3.3739           | R.ADDLLPLGDQTQDGFSGSR.L   | 1            | SNUT1_HUMAN          |
| O43290               | 2             | 3.6778           | R.RQDLYSAR.D              | 4            | SNUT1_HUMAN          |

***U4/U6.U5 tri-snRNP-associated protein 2 - Homo sapiens (Human)***

|        |   |        |               |   |             |
|--------|---|--------|---------------|---|-------------|
| Q53GS9 | 2 | 3.2757 | K.REFEPASAR.E | 1 | SNUT2_HUMAN |
|--------|---|--------|---------------|---|-------------|

***U5 small nuclear ribonucleoprotein 200 kDa helicase - Homo sapiens (Human)***

|        |   |        |                         |   |            |
|--------|---|--------|-------------------------|---|------------|
| O75643 | 2 | 3.547  | K.ANSNLVLQADR.S         | 1 | U520_HUMAN |
| O75643 | 3 | 4.5772 | R.ETYEVLLSFIQAALGDQPR.D | 1 | U520_HUMAN |

***U6 snRNA-associated Sm-like protein LSm2 - Homo sapiens (Human)***

|        |   |        |                         |   |            |
|--------|---|--------|-------------------------|---|------------|
| Q9Y333 | 2 | 2.8267 | R.YVQLPADEVDTQLLQDAAR.K | 1 | LSM2_HUMAN |
|--------|---|--------|-------------------------|---|------------|

***U6 snRNA-associated Sm-like protein LSm3 - Homo sapiens (Human)***

|        |   |        |                  |   |            |
|--------|---|--------|------------------|---|------------|
| P62310 | 2 | 3.4051 | R.GDGVVLVAPPLR.V | 4 | LSM3_HUMAN |
|--------|---|--------|------------------|---|------------|

***Ubiquilin-1 - Homo sapiens (Human)***

|        |   |        |                            |   |             |
|--------|---|--------|----------------------------|---|-------------|
| Q9UMX0 | 3 | 4.9372 | R.NPEISHMLNPNPDIR.Q        | 3 | UBQL1_HUMAN |
| Q9UMX0 | 3 | 5.1407 | K.EKEEFAVPENSSVQQFKEEISK.R | 1 | UBQL1_HUMAN |

***Ubiquilin-2 - Homo sapiens (Human)***

|        |   |       |                      |   |             |
|--------|---|-------|----------------------|---|-------------|
| Q9UHD9 | 2 | 5.578 | R.GPAAAQGSAAAPAEPK.I | 3 | UBQL2_HUMAN |
|--------|---|-------|----------------------|---|-------------|

***Ubiquinol-cytochrome c reductase complex 11 kDa protein, mitochondrial precursor - Homo sapien***

|        |   |        |                               |   |            |
|--------|---|--------|-------------------------------|---|------------|
| P07919 | 1 | 2.2699 | R.EQCEQLEK.C                  | 1 | UCRH_HUMAN |
| P07919 | 2 | 3.5781 | K.MLTESGDPEEEEEEEELVDPLTTVR.E | 3 | UCRH_HUMAN |

***Ubiquinol-cytochrome c reductase complex 14 kDa protein - Homo sapiens (Human)***

|        |   |        |                |   |            |
|--------|---|--------|----------------|---|------------|
| P14927 | 2 | 3.5029 | K.WYYNAAGFNK.L | 5 | UCR6_HUMAN |
|--------|---|--------|----------------|---|------------|

***Ubiquinol-cytochrome-c reductase complex core protein 2, mitochondrial precursor - Homo sapien***

|        |   |        |                         |   |             |
|--------|---|--------|-------------------------|---|-------------|
| P22695 | 2 | 2.779  | K.SM#AASGNLGHPTPFVDEL.- | 1 | UQCR2_HUMAN |
| P22695 | 2 | 3.7793 | K.TIAQGNLSNTDVQAAK.N    | 2 | UQCR2_HUMAN |
| P22695 | 2 | 3.1279 | K.ATAAPAGAPPQPQDLEFTK.L | 1 | UQCR2_HUMAN |
| P22695 | 2 | 4.0057 | K.SMAASGNLGHPTPFVDEL.-  | 1 | UQCR2_HUMAN |

***Ubiquitin carboxyl-terminal hydrolase 10 - Homo sapiens (Human)***

| <i>Accession No*</i>                                                                  | <i>Charge</i> | <i>XC(Max)**</i> | <i>Peptide*</i>              | <i>TC***</i> | <i>Reference No*</i> |
|---------------------------------------------------------------------------------------|---------------|------------------|------------------------------|--------------|----------------------|
| Q14694                                                                                | 2             | 3.8124           | R.IEFGVDEVIEPSDTLPR.T        | 2            | UBP10_HUMAN          |
| <b><i>Ubiquitin carboxyl-terminal hydrolase 47 - Homo sapiens (Human)</i></b>         |               |                  |                              |              |                      |
| Q96K76                                                                                | 2             | 2.8673           | R.ITLNLPASTPVR.K             | 2            | UBP47_HUMAN          |
| <b><i>Ubiquitin carboxyl-terminal hydrolase 7 - Homo sapiens (Human)</i></b>          |               |                  |                              |              |                      |
| Q93009                                                                                | 2             | 2.7712           | K.AGEQQLSEPEDMEMEAGDTDDPPR.I | 1            | UBP7_HUMAN           |
| <b><i>Ubiquitin carboxyl-terminal hydrolase 8 - Homo sapiens (Human)</i></b>          |               |                  |                              |              |                      |
| P40818                                                                                | 3             | 4.6209           | K.KKQEAEEENEITEK.Q           | 3            | UBP8_HUMAN           |
| P40818                                                                                | 2             | 4.1569           | R.MGPLNISTPVEPVAAASK.S       | 3            | UBP8_HUMAN           |
| P40818                                                                                | 2             | 3.9875           | K.SDVSPPIQPVPSIK.N           | 3            | UBP8_HUMAN           |
| <b><i>Ubiquitin carboxyl-terminal hydrolase isozyme L1 - Homo sapiens (Human)</i></b> |               |                  |                              |              |                      |
| P09936                                                                                | 3             | 4.4842           | -.M#QLKPM#EINPEMLNK.V        | 2            | UCHL1_HUMAN          |
| P09936                                                                                | 3             | 4.5148           | -.MQLKPM#EINPEM#LNK.V        | 2            | UCHL1_HUMAN          |
| P09936                                                                                | 3             | 4.1473           | R.MPFVNHGASSEDTLKDAAK.V      | 1            | UCHL1_HUMAN          |
| P09936                                                                                | 3             | 4.4689           | -.MQLKPM#EINPEMLNK.V         | 5            | UCHL1_HUMAN          |
| P09936                                                                                | 2             | 3.3949           | R.LGVAGQWR.F                 | 5            | UCHL1_HUMAN          |
| P09936                                                                                | 3             | 4.6128           | K.KQIEELKGQEVSPK.V           | 2            | UCHL1_HUMAN          |
| P09936                                                                                | 3             | 4.1337           | -.M#QLKPM#EINPEM#LNK.V       | 2            | UCHL1_HUMAN          |
| P09936                                                                                | 3             | 3.9906           | -.M#QLKPM#EINPEM#LNK.V       | 2            | UCHL1_HUMAN          |
| P09936                                                                                | 2             | 3.731            | K.LGFEDGSVLK.Q               | 2            | UCHL1_HUMAN          |
| P09936                                                                                | 3             | 4.6423           | R.M#PFVNHGASSEDTLKDAAK.V     | 3            | UCHL1_HUMAN          |
| P09936                                                                                | 2             | 3.7869           | R.MPFVNHGASSEDTLK.D          | 2            | UCHL1_HUMAN          |
| P09936                                                                                | 3             | 4.6803           | -.MQLKPM#EINPEMLNK.V         | 7            | UCHL1_HUMAN          |
| P09936                                                                                | 3             | 5.8339           | -.M#QLKPM#EINPEMLNK.V        | 1            | UCHL1_HUMAN          |
| P09936                                                                                | 2             | 4.312            | K.QIEELKGQEVSPK.V            | 3            | UCHL1_HUMAN          |
| <b><i>Ubiquitin carboxyl-terminal hydrolase isozyme L3 - Homo sapiens (Human)</i></b> |               |                  |                              |              |                      |
| P15374                                                                                | 3             | 5.1284           | R.VTHETSAHEGQTEAPSIDEK.V     | 1            | UCHL3_HUMAN          |
| <b><i>Ubiquitin domain-containing protein UBFD1 - Homo sapiens (Human)</i></b>        |               |                  |                              |              |                      |
| O14562                                                                                | 2             | 2.9318           | K.FPLDSTGSELK.Q              | 1            | UBFD1_HUMAN          |
| O14562                                                                                | 3             | 4.2604           | K.HDVKFPDSTGSELK.Q           | 2            | UBFD1_HUMAN          |
| <b><i>Ubiquitin fusion degradation protein 1 homolog - Homo sapiens (Human)</i></b>   |               |                  |                              |              |                      |
| Q92890                                                                                | 2             | 3.0502           | K.VEEDEAGGR.F                | 2            | UFD1_HUMAN           |
| <b><i>Ubiquitin interaction motif-containing protein 1 - Homo sapiens (Human)</i></b> |               |                  |                              |              |                      |
| Q96RL1                                                                                | 3             | 5.5477           | R.SRPLATGPSSQSHQEK.T         | 2            | UIMC1_HUMAN          |

| <i>Accession No*</i>                                                                          | <i>Charge</i> | <i>XC(Max)**</i> | <i>Peptide*</i>                    | <i>TC***</i> | <i>Reference No*</i> |
|-----------------------------------------------------------------------------------------------|---------------|------------------|------------------------------------|--------------|----------------------|
| <b><i>Ubiquitin thioesterase OTUB1 - Homo sapiens (Human)</i></b>                             |               |                  |                                    |              |                      |
| Q96FW1                                                                                        | 3             | 4.3645           | R.AFGFSHLEALLDDSKELQR.F            | 1            | OTUB1_HUMAN          |
| <b><i>Ubiquitin-associated protein 1 - Homo sapiens (Human)</i></b>                           |               |                  |                                    |              |                      |
| Q9NZ09                                                                                        | 3             | 4.9497           | R.NILVGTTGPIMAQLLDNNLPR.G          | 2            | UBAP1_HUMAN          |
| Q9NZ09                                                                                        | 2             | 2.7444           | K.MMEFLQLMSK.F                     | 1            | UBAP1_HUMAN          |
| <b><i>Ubiquitin-associated protein 2 - Homo sapiens (Human)</i></b>                           |               |                  |                                    |              |                      |
| Q5T6F2                                                                                        | 3             | 4.769            | K.LVVWEAAQNGADEGTELASNTHNIAQDLSNK. | 3            | UBAP2_HUMAN          |
| <b><i>Ubiquitin-associated protein 2-like - Homo sapiens (Human)</i></b>                      |               |                  |                                    |              |                      |
| Q14157                                                                                        | 3             | 4.1454           | R.QAFTPSSTMMEVFLQEK.S              | 2            | UBP2L_HUMAN          |
| Q14157                                                                                        | 3             | 3.9239           | K.STSAPQMSPGSSDNQSSSPQPAQK.L       | 3            | UBP2L_HUMAN          |
| Q14157                                                                                        | 1             | 2.1359           | K.DLTQAK.N                         | 1            | UBP2L_HUMAN          |
| Q14157                                                                                        | 2             | 4.2289           | K.GGSTTGSQFLEQFK.T                 | 10           | UBP2L_HUMAN          |
| Q14157                                                                                        | 2             | 2.9543           | K.NGFSSVQATQLQTTQSVEGATGSAVK.S     | 1            | UBP2L_HUMAN          |
| Q14157                                                                                        | 3             | 4.3054           | K.STSAPQM#SPGSSDNQSSSPQPAQK.L      | 2            | UBP2L_HUMAN          |
| Q14157                                                                                        | 2             | 3.7057           | R.RYPSSISSSPQK.D                   | 2            | UBP2L_HUMAN          |
| Q14157                                                                                        | 2             | 3.4542           | R.YPSSISSSPQK.D                    | 2            | UBP2L_HUMAN          |
| Q14157                                                                                        | 2             | 4.1911           | K.SPAVATSTAAPPPSSPLPSK.S           | 1            | UBP2L_HUMAN          |
| Q14157                                                                                        | 2             | 4.5657           | K.NPSDSAVHSPFTK.R                  | 3            | UBP2L_HUMAN          |
| <b><i>Ubiquitin-conjugating enzyme E2 E2 - Homo sapiens (Human)</i></b>                       |               |                  |                                    |              |                      |
| Q96LR5                                                                                        | 2             | 4.0697           | R.VDDSPSTSGGSSDGDQR.E              | 5            | UB2E2_HUMAN          |
| <b><i>Ubiquitin-conjugating enzyme E2 O - Homo sapiens (Human)</i></b>                        |               |                  |                                    |              |                      |
| Q9C0C9                                                                                        | 3             | 5.2714           | R.LHSAEQDADDEAADDTDSSVTSSASSTTSS   | 1            | UBE2O_HUMAN          |
| <b><i>UBX domain-containing protein 1 - Homo sapiens (Human)</i></b>                          |               |                  |                                    |              |                      |
| Q9BZV1                                                                                        | 2             | 2.7907           | R.QGPTNEAQMAAAAALAR.L              | 1            | UBXD1_HUMAN          |
| <b><i>UBX domain-containing protein 2 - Homo sapiens (Human)</i></b>                          |               |                  |                                    |              |                      |
| Q92575                                                                                        | 2             | 3.0701           | R.IKQQIALDR.A                      | 2            | UBXD2_HUMAN          |
| <b><i>UBX domain-containing protein 7 - Homo sapiens (Human)</i></b>                          |               |                  |                                    |              |                      |
| O94888                                                                                        | 2             | 3.6051           | R.FELLTNFPR.R                      | 2            | UBXD7_HUMAN          |
| <b><i>UBX domain-containing protein 8 - Homo sapiens (Human)</i></b>                          |               |                  |                                    |              |                      |
| Q96CS3                                                                                        | 2             | 2.8961           | R.DLTQEYTEK.L                      | 1            | UBXD8_HUMAN          |
| <b><i>UDP-glucose:glycoprotein glucosyltransferase 1 precursor - Homo sapiens (Human)</i></b> |               |                  |                                    |              |                      |
| Q9NYU2                                                                                        | 2             | 3.2595           | R.YVLEPEISFTSDNSFAK.G              | 1            | UGGG1_HUMAN          |

| <i>Accession No*</i>                                                                        | <i>Charge</i> | <i>XC(Max)**</i> | <i>Peptide*</i>                     | <i>TC***</i> | <i>Reference No*</i> |
|---------------------------------------------------------------------------------------------|---------------|------------------|-------------------------------------|--------------|----------------------|
| <b><i>UDP-glucuronosyltransferase 2B7 precursor - Homo sapiens (Human)</i></b>              |               |                  |                                     |              |                      |
| P16662                                                                                      | 2             | 3.5509           | R.ANVIASALAQIPQK.V                  | 1            | UD2B7_HUMAN          |
| <b><i>UMP-CMP kinase - Homo sapiens (Human)</i></b>                                         |               |                  |                                     |              |                      |
| P30085                                                                                      | 3             | 4.2313           | R.IQTYLQSTKPIIDLYEEM#GK.V           | 1            | KCY_HUMAN            |
| P30085                                                                                      | 3             | 3.7054           | K.SVDEVFDEVVQIFDKEG.-               | 2            | KCY_HUMAN            |
| P30085                                                                                      | 3             | 5.9117           | K.RIQTYLQSTKPIIDLYEEMGK.V           | 2            | KCY_HUMAN            |
| P30085                                                                                      | 3             | 4.7521           | K.RIQTYLQSTKPIIDLYEEM#GK.V          | 2            | KCY_HUMAN            |
| P30085                                                                                      | 3             | 4.0794           | -.MKPLVVFVLGGPGAGK.G                | 1            | KCY_HUMAN            |
| P30085                                                                                      | 2             | 3.8843           | -.M#KPLVVFVLGGPGAGK.G               | 1            | KCY_HUMAN            |
| <b><i>Uncharacterized potential DNA-binding protein C17orf49 - Homo sapiens (Human)</i></b> |               |                  |                                     |              |                      |
| Q8IXM2                                                                                      | 3             | 4.6636           | K.ADVTLNALNDSANDSDVVDIEGLGETPPAKK.L | 1            | CQ049_HUMAN          |
| Q8IXM2                                                                                      | 2             | 4.298            | K.VYEDSGIPLPAESPK.K                 | 3            | CQ049_HUMAN          |
| <b><i>Uncharacterized protein C10orf118 - Homo sapiens (Human)</i></b>                      |               |                  |                                     |              |                      |
| Q7Z3E2                                                                                      | 2             | 2.7659           | R.DANKELEK.N                        | 1            | CJ118_HUMAN          |
| <b><i>Uncharacterized protein C10orf32 - Homo sapiens (Human)</i></b>                       |               |                  |                                     |              |                      |
| Q96B45                                                                                      | 3             | 5.6056           | K.MAIITTHLQYQQEAIQK.N               | 2            | CJ032_HUMAN          |
| <b><i>Uncharacterized protein C11orf52 - Homo sapiens (Human)</i></b>                       |               |                  |                                     |              |                      |
| Q96A22                                                                                      | 3             | 4.4439           | K.HVHLENATEYATLR.F                  | 3            | CK052_HUMAN          |
| Q96A22                                                                                      | 2             | 3.6398           | R.VLQQQGSQER.S                      | 4            | CK052_HUMAN          |
| <b><i>Uncharacterized protein C11orf56 - Homo sapiens (Human)</i></b>                       |               |                  |                                     |              |                      |
| Q8N612                                                                                      | 3             | 5.4024           | R.RPTPAEEPGELEDNYLEYLR.E            | 2            | CK056_HUMAN          |
| <b><i>Uncharacterized protein C12orf42 - Homo sapiens (Human)</i></b>                       |               |                  |                                     |              |                      |
| Q96LP6                                                                                      | 2             | 2.9846           | -.M#STVIC*M#KQRDEEFLLTIR.P          | 8            | CL042_HUMAN          |
| <b><i>Uncharacterized protein C12orf55 - Homo sapiens (Human)</i></b>                       |               |                  |                                     |              |                      |
| Q96N23                                                                                      | 2             | 3.5756           | K.AEKDLTLIAMEPLINVK.R               | 3            | Q96N23_HUMAN         |
| <b><i>Uncharacterized protein C14orf133 - Homo sapiens (Human)</i></b>                      |               |                  |                                     |              |                      |
| Q9H9C1                                                                                      | 2             | 2.7975           | R.VSWSGEPVGSISWSIR.E                | 1            | CN133_HUMAN          |
| Q9H9C1                                                                                      | 2             | 3.5007           | R.DFVDDDDDDDLER.V                   | 2            | CN133_HUMAN          |
| Q9H9C1                                                                                      | 2             | 3.4024           | K.AFTFDEDEDELSQLK.E                 | 3            | CN133_HUMAN          |
| <b><i>Uncharacterized protein C14orf173 - Homo sapiens (Human)</i></b>                      |               |                  |                                     |              |                      |
| Q27J81                                                                                      | 2             | 2.8853           | R.SQEEVPPDSDDNK.T                   | 1            | Q27J81_HUMAN         |

Accession No\* Charge XC(Max)\*\* Peptide\* TC\*\*\* Reference No\*

***Uncharacterized protein C15orf38 - Homo sapiens (Human)***

|        |   |        |                   |   |             |
|--------|---|--------|-------------------|---|-------------|
| Q7Z6K5 | 2 | 4.5252 | K.TRGDGPFLDSLAK.L | 3 | CO038_HUMAN |
| Q7Z6K5 | 2 | 3.9279 | K.TGASWTDNIMAQK.C | 4 | CO038_HUMAN |
| Q7Z6K5 | 2 | 4.5654 | R.KVNTGFLMSSYK.V  | 2 | CO038_HUMAN |

***Uncharacterized protein C16orf14 - Homo sapiens (Human)***

|        |   |        |                         |   |             |
|--------|---|--------|-------------------------|---|-------------|
| Q9BUT9 | 2 | 3.2412 | R.AQPFAQPPGPWPLSSPGPR.L | 2 | CP014_HUMAN |
| Q9BUT9 | 2 | 3.3056 | R.TGPTQQQVEGR.L         | 2 | CP014_HUMAN |

***Uncharacterized protein C16orf53 - Homo sapiens (Human)***

|        |   |        |              |   |             |
|--------|---|--------|--------------|---|-------------|
| Q9BTK6 | 2 | 2.8104 | K.KLEEQILR.T | 1 | CP053_HUMAN |
|--------|---|--------|--------------|---|-------------|

***Uncharacterized protein C17orf59 - Homo sapiens (Human)***

|        |   |        |                     |   |             |
|--------|---|--------|---------------------|---|-------------|
| Q96GS4 | 2 | 3.9164 | R.ATISSPLELEGTVSR.H | 1 | CQ059_HUMAN |
|--------|---|--------|---------------------|---|-------------|

***Uncharacterized protein C17orf80 - Homo sapiens (Human)***

|        |   |        |                 |   |             |
|--------|---|--------|-----------------|---|-------------|
| Q9BSJ5 | 2 | 3.1328 | K.LVVDKPEQTVK.T | 1 | CQ080_HUMAN |
|--------|---|--------|-----------------|---|-------------|

***Uncharacterized protein C18orf25 - Homo sapiens (Human)***

|        |   |        |                            |   |             |
|--------|---|--------|----------------------------|---|-------------|
| Q96B23 | 2 | 3.8529 | R.DSSESQLASTESDKPTTGR.V    | 3 | CR025_HUMAN |
| Q96B23 | 2 | 3.9591 | K.HGSGTQYVSTR.Q            | 6 | CR025_HUMAN |
| Q96B23 | 2 | 3.1961 | R.GGVIQSVSSWK.H            | 2 | CR025_HUMAN |
| Q96B23 | 2 | 4.5822 | R.SRSESETSTMAAK.K          | 2 | CR025_HUMAN |
| Q96B23 | 2 | 3.0639 | R.SESETSTMAAK.K            | 1 | CR025_HUMAN |
| Q96B23 | 3 | 5.0448 | K.ASEQETAKEEDGSVELESQVQK.D | 2 | CR025_HUMAN |

***Uncharacterized protein C19orf21 - Homo sapiens (Human)***

|        |   |        |                     |   |             |
|--------|---|--------|---------------------|---|-------------|
| Q8IVT2 | 1 | 2.4549 | R.IYASEEDD.-        | 3 | CS021_HUMAN |
| Q8IVT2 | 2 | 2.7803 | R.EQEVAEERR.N       | 1 | CS021_HUMAN |
| Q8IVT2 | 2 | 4.0364 | R.WAVIQGQAVR.K      | 2 | CS021_HUMAN |
| Q8IVT2 | 2 | 4.2856 | R.GTPAGTTPGASQAPK.A | 6 | CS021_HUMAN |

***Uncharacterized protein C19orf43 - Homo sapiens (Human)***

|        |   |        |                  |   |             |
|--------|---|--------|------------------|---|-------------|
| Q9BQ61 | 2 | 2.7072 | K.GGPGSTLSFVGK.R | 1 | CS043_HUMAN |
| Q9BQ61 | 2 | 3.1263 | K.TEDEVLTSK.G    | 2 | CS043_HUMAN |

***Uncharacterized protein C19orf61 - Homo sapiens (Human)***

|        |   |        |                   |   |             |
|--------|---|--------|-------------------|---|-------------|
| Q9H0W8 | 2 | 3.8832 | R.DASEETSTSVMQK.T | 2 | CS061_HUMAN |
| Q9H0W8 | 2 | 3.4723 | R.DASEETSTSV#QK.T | 2 | CS061_HUMAN |

***Uncharacterized protein C19orf62 - Homo sapiens (Human)***

| <i>Accession No*</i>                                                  | <i>Charge</i> | <i>XC(Max)**</i> | <i>Peptide*</i>              | <i>TC***</i> | <i>Reference No*</i> |
|-----------------------------------------------------------------------|---------------|------------------|------------------------------|--------------|----------------------|
| Q9NWW8                                                                | 2             | 4.7293           | R.SEGEGEAASADDGSLNTSGAGPK.S  | 3            | CS062_HUMAN          |
| Q9NWW8                                                                | 2             | 3.38             | R.AVGAQASVGSR.S              | 3            | CS062_HUMAN          |
| <b><i>Uncharacterized protein Clorf116 - Homo sapiens (Human)</i></b> |               |                  |                              |              |                      |
| Q9BW04                                                                | 3             | 4.1557           | R.KSTTQASSHNPGEPR.L          | 1            | Q9BW04_HUMAN         |
| Q9BW04                                                                | 2             | 3.7231           | R.LAPEPEKEQVSSQPR.Q          | 2            | Q9BW04_HUMAN         |
| <b><i>Uncharacterized protein Clorf123 - Homo sapiens (Human)</i></b> |               |                  |                              |              |                      |
| Q9NWW4                                                                | 2             | 3.0645           | K.AQESVGIYEVTHQFVK.C         | 1            | CA123_HUMAN          |
| <b><i>Uncharacterized protein Clorf174 - Homo sapiens (Human)</i></b> |               |                  |                              |              |                      |
| Q8IYL3                                                                | 2             | 3.368            | R.AKDDDDDDDDAEM#.-           | 2            | CA174_HUMAN          |
| <b><i>Uncharacterized protein Clorf179 - Homo sapiens (Human)</i></b> |               |                  |                              |              |                      |
| Q5VUG5                                                                | 3             | 4.2723           | R.DNTAVHQVYYDIFEPLLSQFK.Q    | 1            | Q5VUG5_HUMAN         |
| <b><i>Uncharacterized protein Clorf198 - Homo sapiens (Human)</i></b> |               |                  |                              |              |                      |
| Q9H425                                                                | 2             | 3.6535           | R.LPPAQQDEIIDR.C             | 5            | CA198_HUMAN          |
| Q9H425                                                                | 2             | 3.0989           | R.QDDGEDTLFSEPK.F            | 2            | CA198_HUMAN          |
| Q9H425                                                                | 2             | 3.5242           | R.GEGPEAEFQSLTPSQIK.S        | 3            | CA198_HUMAN          |
| Q9H425                                                                | 3             | 5.7796           | R.ERPQPVQAFSSALHEAAPSQLEGK.L | 1            | CA198_HUMAN          |
| Q9H425                                                                | 2             | 3.8604           | R.DPGDSEELTR.F               | 3            | CA198_HUMAN          |
| Q9H425                                                                | 2             | 4.8178           | R.SRGEPEAEFQSLTPSQIK.S       | 4            | CA198_HUMAN          |
| Q9H425                                                                | 2             | 3.1865           | K.FAQVSSSNVVLK.T             | 1            | CA198_HUMAN          |
| <b><i>Uncharacterized protein Clorf25 - Homo sapiens (Human)</i></b>  |               |                  |                              |              |                      |
| Q8NC68                                                                | 2             | 2.9642           | K.TTDDTTTNDNYIAQ GK.R        | 1            | Q8NC68_HUMAN         |
| <b><i>Uncharacterized protein Clorf31 - Homo sapiens (Human)</i></b>  |               |                  |                              |              |                      |
| Q5JTJ3                                                                | 2             | 4.3173           | K.EKFEAGQFEPSETTAK.S         | 2            | CA031_HUMAN          |
| Q5JTJ3                                                                | 2             | 4.3065           | K.EKFEAGQFEPSETTAKS.-        | 5            | CA031_HUMAN          |
| Q5JTJ3                                                                | 2             | 4.8405           | K.FEAGQFEPSETTAK.S           | 12           | CA031_HUMAN          |
| Q5JTJ3                                                                | 2             | 4.0929           | K.FEAGQFEPSETTAKS.-          | 4            | CA031_HUMAN          |
| <b><i>Uncharacterized protein Clorf50 - Homo sapiens (Human)</i></b>  |               |                  |                              |              |                      |
| Q9BV19                                                                | 2             | 2.8645           | K.KPGNIYYLYK.R               | 2            | CA050_HUMAN          |
| Q9BV19                                                                | 2             | 3.5633           | R.ESGQQYFSIISPK.E            | 2            | CA050_HUMAN          |
| Q9BV19                                                                | 3             | 3.8806           | K.LTVIAEQIHLQEQR.K           | 2            | CA050_HUMAN          |
| Q9BV19                                                                | 3             | 4.1803           | R.AGDPLDLVALAEQVQK.A         | 1            | CA050_HUMAN          |
| <b><i>Uncharacterized protein Clorf52 - Homo sapiens (Human)</i></b>  |               |                  |                              |              |                      |
| Q8N6N3                                                                | 2             | 3.5953           | K.WSNIYEDNGDDAPQNAK.K        | 1            | CA052_HUMAN          |

| <i>Accession No*</i>                                                             | <i>Charge</i> | <i>XC(Max)**</i> | <i>Peptide*</i>                     | <i>TC***</i> | <i>Reference No*</i> |
|----------------------------------------------------------------------------------|---------------|------------------|-------------------------------------|--------------|----------------------|
| <b><i>Uncharacterized protein C1orf55 - Homo sapiens (Human)</i></b>             |               |                  |                                     |              |                      |
| Q6IQ49                                                                           | 2             | 3.2478           | R.MVTETEETQEK.K                     | 2            | CA055_HUMAN          |
| <b><i>Uncharacterized protein C20orf116 precursor - Homo sapiens (Human)</i></b> |               |                  |                                     |              |                      |
| Q96HY6                                                                           | 2             | 3.6539           | R.IQDLLAEGTITGVDDR.G                | 1            | CT116_HUMAN          |
| Q96HY6                                                                           | 2             | 3.5764           | K.VVLLLEDLASQVGLR.T                 | 1            | CT116_HUMAN          |
| <b><i>Uncharacterized protein C2orf33 - Homo sapiens (Human)</i></b>             |               |                  |                                     |              |                      |
| Q9GZY8                                                                           | 3             | 4.2873           | R.VLTLSERPLDFDLRPPPTPQNEEIR.A       | 1            | CB033_HUMAN          |
| Q9GZY8                                                                           | 3             | 4.0548           | K.VAPPNADLEQGFQEGVFNASVIM#QVPER.I   | 2            | CB033_HUMAN          |
| Q9GZY8                                                                           | 3             | 4.6474           | R.IVAGNNEVDVSFRPADLDLIQSTPFKPLALK.T | 2            | CB033_HUMAN          |
| <b><i>Uncharacterized protein C2orf34 - Homo sapiens (Human)</i></b>             |               |                  |                                     |              |                      |
| Q7Z624                                                                           | 2             | 2.8694           | R.VADAGTGETAR.A                     | 1            | Q7Z624_HUMAN         |
| <b><i>Uncharacterized protein C2orf55 - Homo sapiens (Human)</i></b>             |               |                  |                                     |              |                      |
| Q6NV74                                                                           | 2             | 4.4544           | R.IGTEPSTAPAPSPPAPK.S               | 4            | CB055_HUMAN          |
| Q6NV74                                                                           | 2             | 3.6796           | R.NEVIAIESGPGVGYDSEDELEESR.G        | 1            | CB055_HUMAN          |
| Q6NV74                                                                           | 2             | 2.7125           | R.AEAPPAGAER.A                      | 1            | CB055_HUMAN          |
| Q6NV74                                                                           | 2             | 3.6801           | R.EAAEGLGEDSTGK.K                   | 2            | CB055_HUMAN          |
| <b><i>Uncharacterized protein C3orf1 - Homo sapiens (Human)</i></b>              |               |                  |                                     |              |                      |
| Q9NPL8                                                                           | 2             | 3.019            | R.NPSVIDKQDKD.-                     | 2            | CC001_HUMAN          |
| <b><i>Uncharacterized protein C3orf19 - Homo sapiens (Human)</i></b>             |               |                  |                                     |              |                      |
| Q6PII3                                                                           | 3             | 3.9955           | R.AEKDAEQKIEEQK.T                   | 1            | CC019_HUMAN          |
| <b><i>Uncharacterized protein C4orf14 - Homo sapiens (Human)</i></b>             |               |                  |                                     |              |                      |
| Q8NC60                                                                           | 2             | 3.238            | R.FLFPEYILDPEPQPTR.E                | 1            | CD014_HUMAN          |
| <b><i>Uncharacterized protein C6orf115 - Homo sapiens (Human)</i></b>            |               |                  |                                     |              |                      |
| Q9P1F3                                                                           | 2             | 3.1039           | K.FGVLFRRDDK.C                      | 1            | CF115_HUMAN          |
| <b><i>Uncharacterized protein C6orf203 - Homo sapiens (Human)</i></b>            |               |                  |                                     |              |                      |
| Q9P0P8                                                                           | 3             | 6.2685           | K.VGDTLDDLIGEDKEAGTETVM#R.I         | 1            | CF203_HUMAN          |
| Q9P0P8                                                                           | 3             | 5.3408           | K.VGDTLDDLIGEDKEAGTETVMR.I          | 3            | CF203_HUMAN          |
| <b><i>Uncharacterized protein C8orf42 - Homo sapiens (Human)</i></b>             |               |                  |                                     |              |                      |
| Q86YL5                                                                           | 2             | 2.7656           | K.SGFWDNLVLK.Q                      | 1            | Q86YL5_HUMAN         |
| <b><i>Uncharacterized protein C8orf47 - Homo sapiens (Human)</i></b>             |               |                  |                                     |              |                      |
| Q6P6B1                                                                           | 3             | 6.2674           | K.TPEGPGNMEQIQPEGIVGSMHPAR.N        | 4            | CH047_HUMAN          |



| <i>Accession No*</i>                                                  | <i>Charge</i> | <i>XC(Max)**</i> | <i>Peptide*</i>                     | <i>TC***</i> | <i>Reference No*</i> |
|-----------------------------------------------------------------------|---------------|------------------|-------------------------------------|--------------|----------------------|
| Q6P6B1                                                                | 2             | 2.898            | R.ESTVDGNVQR.E                      | 1            | CH047_HUMAN          |
| Q6P6B1                                                                | 3             | 5.3317           | K.DAGAGTEAESLKGNAEQPLGPEAK.G        | 6            | CH047_HUMAN          |
| Q6P6B1                                                                | 2             | 3.0906           | K.DAGAGTEAESLK.G                    | 2            | CH047_HUMAN          |
| Q6P6B1                                                                | 3             | 5.1527           | K.KDAGAGTEAESLKGNAEQPLGPEAK.G       | 2            | CH047_HUMAN          |
| <b><i>Uncharacterized protein C9orf142 - Homo sapiens (Human)</i></b> |               |                  |                                     |              |                      |
| Q9BUH6                                                                | 2             | 3.3304           | R.FGLSAAEDITPR.F                    | 2            | CI142_HUMAN          |
| Q9BUH6                                                                | 2             | 3.1514           | K.SKKPAGGVDFDET.-                   | 1            | CI142_HUMAN          |
| <b><i>Uncharacterized protein C9orf40 - Homo sapiens (Human)</i></b>  |               |                  |                                     |              |                      |
| Q8IXQ3                                                                | 2             | 3.7603           | R.LPGGGGDDGAGR.A                    | 5            | CI040_HUMAN          |
| <b><i>Uncharacterized protein C9orf71 - Homo sapiens (Human)</i></b>  |               |                  |                                     |              |                      |
| Q8N6L7                                                                | 2             | 4.6684           | R.ESIAGLVVTAISEDAQR.R               | 3            | CI071_HUMAN          |
| <b><i>Uncharacterized protein C9orf78 - Homo sapiens (Human)</i></b>  |               |                  |                                     |              |                      |
| Q9NZ63                                                                | 2             | 4.2999           | K.VQEETTLVDDPFQMK.T                 | 2            | CI078_HUMAN          |
| Q9NZ63                                                                | 2             | 3.6662           | R.GDSESEEDEQDSEEV.R.L               | 1            | CI078_HUMAN          |
| <b><i>Uncharacterized protein C9orf82 - Homo sapiens (Human)</i></b>  |               |                  |                                     |              |                      |
| Q9H8G2                                                                | 2             | 3.9122           | K.SVNEILGLAESSPNEPK.A               | 2            | CI082_HUMAN          |
| <b><i>Uncharacterized protein KIAA0133 - Homo sapiens (Human)</i></b> |               |                  |                                     |              |                      |
| Q14146                                                                | 2             | 2.7815           | R.CDAAFIIGSGR.K                     | 1            | K0133_HUMAN          |
| <b><i>Uncharacterized protein KIAA0157 - Homo sapiens (Human)</i></b> |               |                  |                                     |              |                      |
| Q15018                                                                | 2             | 3.7077           | R.QMPSESLDPAFSPR.M                  | 1            | K0157_HUMAN          |
| Q15018                                                                | 2             | 4.0523           | K.YPGSGADLPPPQR.A                   | 3            | K0157_HUMAN          |
| Q15018                                                                | 2             | 2.8268           | R.M#PSSGFAAEGR.S                    | 2            | K0157_HUMAN          |
| Q15018                                                                | 2             | 3.7299           | R.MPSSGFAAEGR.S                     | 2            | K0157_HUMAN          |
| <b><i>Uncharacterized protein KIAA0256 - Homo sapiens (Human)</i></b> |               |                  |                                     |              |                      |
| Q93073                                                                | 2             | 2.7815           | K.HSNNQPAAGALR.N                    | 1            | K0256_HUMAN          |
| Q93073                                                                | 2             | 2.9135           | K.QPSLVATGSTTSATSAGK.S              | 1            | K0256_HUMAN          |
| Q93073                                                                | 2             | 3.5958           | K.TPVQLDLGDMMLAALEK.Q               | 1            | K0256_HUMAN          |
| <b><i>Uncharacterized protein KIAA0427 - Homo sapiens (Human)</i></b> |               |                  |                                     |              |                      |
| O43310                                                                | 3             | 4.0843           | R.TQSHISQWTADCSEPLDSSCSFSR.G        | 1            | K0427_HUMAN          |
| <b><i>Uncharacterized protein KIAA0460 - Homo sapiens (Human)</i></b> |               |                  |                                     |              |                      |
| Q5VT52                                                                | 3             | 5.4798           | K.GNPGFSGNLNIPILSSLGSSAPSESHPSDFQR. | 1            | K0460_HUMAN          |
| Q5VT52                                                                | 3             | 4.8316           | K.FYPDTSFQEDEDYRDFEYSGPPPSAMMNLEK.  | 1            | K0460_HUMAN          |

| <i>Accession No*</i>                                                  | <i>Charge</i> | <i>XC(Max)**</i> | <i>Peptide*</i>                     | <i>TC***</i> | <i>Reference No*</i> |
|-----------------------------------------------------------------------|---------------|------------------|-------------------------------------|--------------|----------------------|
| Q5VT52                                                                | 2             | 4.5484           | R.LSSSPGLFGAFSVR.G                  | 2            | K0460_HUMAN          |
| Q5VT52                                                                | 3             | 3.9827           | R.DAPTHLPSVDLSNPFTK.E               | 3            | K0460_HUMAN          |
| Q5VT52                                                                | 2             | 3.7608           | R.APQFQESVGSFR.S                    | 4            | K0460_HUMAN          |
| Q5VT52                                                                | 2             | 2.9068           | K.LESESTSPSLEM#K.I                  | 1            | K0460_HUMAN          |
| Q5VT52                                                                | 2             | 3.5182           | K.LESESTSPSLEMK.I                   | 2            | K0460_HUMAN          |
| <b><i>Uncharacterized protein KIAA0515 - Homo sapiens (Human)</i></b> |               |                  |                                     |              |                      |
| Q5JSZ5                                                                | 2             | 3.4055           | R.LLSFSPEEFPTLK.A                   | 3            | K0515_HUMAN          |
| <b><i>Uncharacterized protein KIAA0819 - Homo sapiens (Human)</i></b> |               |                  |                                     |              |                      |
| O94909                                                                | 2             | 2.7911           | R.GPSQATSPIR.S                      | 1            | K0819_HUMAN          |
| O94909                                                                | 2             | 3.3313           | K.GKSEEELEASK.S                     | 2            | K0819_HUMAN          |
| O94909                                                                | 3             | 3.7944           | K.SFVESVEEIPFADDVEDTYDDKTEDSSLQEK.F | 1            | K0819_HUMAN          |
| <b><i>Uncharacterized protein KIAA1143 - Homo sapiens (Human)</i></b> |               |                  |                                     |              |                      |
| Q96AT1                                                                | 2             | 3.6183           | K.ADEEPTPADGR.I                     | 6            | K1143_HUMAN          |
| Q96AT1                                                                | 3             | 5.1573           | K.KPNEDEVNQDSVKK.N                  | 2            | K1143_HUMAN          |
| <b><i>Uncharacterized protein KIAA1543 - Homo sapiens (Human)</i></b> |               |                  |                                     |              |                      |
| Q9P1Y5                                                                | 2             | 4.0061           | K.AVASSPAATNSEVK.M                  | 4            | K1543_HUMAN          |
| Q9P1Y5                                                                | 2             | 2.9355           | R.SSILLAEETPPEEPAAR.P               | 3            | K1543_HUMAN          |
| Q9P1Y5                                                                | 2             | 3.4267           | K.LSAALSSLQR.D                      | 2            | K1543_HUMAN          |
| Q9P1Y5                                                                | 2             | 3.6323           | R.APAEEEEVGPR.K                     | 2            | K1543_HUMAN          |
| <b><i>Uncharacterized protein KIAA1671 - Homo sapiens (Human)</i></b> |               |                  |                                     |              |                      |
| Q9BY89                                                                | 2             | 4.5713           | R.MPGLVGQEVGSGEGPR.T                | 2            | K1671_HUMAN          |
| Q9BY89                                                                | 2             | 3.3314           | K.AVSEGAEAAK.L                      | 2            | K1671_HUMAN          |
| Q9BY89                                                                | 3             | 4.737            | K.DLDNRMPGLVGQEVGSGEGPR.T           | 1            | K1671_HUMAN          |
| Q9BY89                                                                | 3             | 3.8045           | K.RPEVDSPGETPSWAPQPK.S              | 1            | K1671_HUMAN          |
| Q9BY89                                                                | 2             | 2.8691           | K.SPFQPGVLGSR.V                     | 1            | K1671_HUMAN          |
| Q9BY89                                                                | 2             | 3.9467           | R.DLEKEDAPQEK.E                     | 2            | K1671_HUMAN          |
| Q9BY89                                                                | 2             | 4.1707           | R.SPLEDETNTWM#FK.D                  | 2            | K1671_HUMAN          |
| Q9BY89                                                                | 2             | 4.1027           | R.VETQEVNPGASR.D                    | 2            | K1671_HUMAN          |
| Q9BY89                                                                | 2             | 4.2171           | R.SPLEDETNTWMFK.D                   | 3            | K1671_HUMAN          |
| Q9BY89                                                                | 3             | 3.7891           | R.KVADEGSGPTAGDMAGLERPR.A           | 1            | K1671_HUMAN          |
| Q9BY89                                                                | 3             | 4.9387           | K.AEAPLHDPDLDFLEVAK.K               | 2            | K1671_HUMAN          |
| Q9BY89                                                                | 2             | 3.513            | R.MPAFFGMDPAVLK.A                   | 2            | K1671_HUMAN          |
| Q9BY89                                                                | 3             | 3.7056           | R.SAPLSQDTKPPVPQEEAGQDHPPSK.A       | 1            | K1671_HUMAN          |
| <b><i>Uncharacterized protein KIAA1704 - Homo sapiens (Human)</i></b> |               |                  |                                     |              |                      |

| <i>Accession No*</i>                                                   | <i>Charge</i> | <i>XC(Max)**</i> | <i>Peptide*</i>                | <i>TC***</i> | <i>Reference No*</i> |
|------------------------------------------------------------------------|---------------|------------------|--------------------------------|--------------|----------------------|
| Q8IXQ4                                                                 | 3             | 4.1932           | K.LTKGDDSSKPIVR.E              | 1            | K1704_HUMAN          |
| Q8IXQ4                                                                 | 2             | 2.7189           | R.DLIGPALPPGFK.A               | 1            | K1704_HUMAN          |
| Q8IXQ4                                                                 | 2             | 3.1811           | K.GPVNYNVTTEFEK.R              | 2            | K1704_HUMAN          |
| Q8IXQ4                                                                 | 2             | 3.7092           | K.GDDSSKPIVR.E                 | 2            | K1704_HUMAN          |
| Q8IXQ4                                                                 | 2             | 4.165            | R.LAEQVSSYNESK.R               | 3            | K1704_HUMAN          |
| <b><i>Uncharacterized protein KIAA1712 - Homo sapiens (Human)</i></b>  |               |                  |                                |              |                      |
| Q9C0F1                                                                 | 2             | 3.0569           | K.ISAEAVGVDISGR.F              | 1            | K1712_HUMAN          |
| Q9C0F1                                                                 | 2             | 3.9901           | K.VMVDENTWTNLLSR.V             | 2            | K1712_HUMAN          |
| <b><i>Uncharacterized protein RUNDC2B - Homo sapiens (Human)</i></b>   |               |                  |                                |              |                      |
| Q8IUI4                                                                 | 2             | 4.23             | K.SIDDEDVDENEDDVGNSGR.K        | 3            | RUN2B_HUMAN          |
| <b><i>UPF0235 protein C15orf40 - Homo sapiens (Human)</i></b>          |               |                  |                                |              |                      |
| Q8WUR7                                                                 | 2             | 3.5438           | K.LLASTTPEEILEK.L              | 1            | CO040_HUMAN          |
| <b><i>UPF0279 protein C14orf129 - Homo sapiens (Human)</i></b>         |               |                  |                                |              |                      |
| Q9P0R6                                                                 | 3             | 4.6509           | R.LEAEAVVNDVLFVANNMFVSK.S      | 1            | CN129_HUMAN          |
| Q9P0R6                                                                 | 2             | 3.2397           | R.EAFGNALLQR.L                 | 2            | CN129_HUMAN          |
| <b><i>UPF0293 protein C16orf42 - Homo sapiens (Human)</i></b>          |               |                  |                                |              |                      |
| Q9UJK0                                                                 | 2             | 2.7493           | R.LPSDTDDSDASEDPGGAER.G        | 1            | CP042_HUMAN          |
| <b><i>UPF0318 protein FAM120A - Homo sapiens (Human)</i></b>           |               |                  |                                |              |                      |
| Q9NZB2                                                                 | 2             | 4.1409           | K.AEGSSTASSGSQLAEGK.G          | 3            | F120A_HUMAN          |
| Q9NZB2                                                                 | 2             | 6.2825           | K.NQAAIQGRPPYAASAEVAK.E        | 3            | F120A_HUMAN          |
| Q9NZB2                                                                 | 2             | 4.145            | K.SQGGVQPIPSQGGK.L             | 1            | F120A_HUMAN          |
| <b><i>UPF0366 protein C11orf67 - Homo sapiens (Human)</i></b>          |               |                  |                                |              |                      |
| Q9H7C9                                                                 | 2             | 3.3734           | K.EYNALVAQGVR.V                | 4            | CK067_HUMAN          |
| <b><i>UPF0368 protein Cxorf26 - Homo sapiens (Human)</i></b>           |               |                  |                                |              |                      |
| Q9BVG4                                                                 | 2             | 3.2307           | K.LISSVDPQFLK.L                | 1            | CX026_HUMAN          |
| Q9BVG4                                                                 | 2             | 4.1898           | K.FNGIVEDFNYGTLR.L             | 2            | CX026_HUMAN          |
| Q9BVG4                                                                 | 3             | 3.8463           | K.GADSGEEKEEGINR.E             | 1            | CX026_HUMAN          |
| Q9BVG4                                                                 | 3             | 3.8812           | K.GADSGEEKEEGINREDK.T          | 1            | CX026_HUMAN          |
| <b><i>UPF0369 protein C6orf57 precursor - Homo sapiens (Human)</i></b> |               |                  |                                |              |                      |
| Q5VUM1                                                                 | 3             | 5.698            | R.FDAPEDSHLEKEPLEKFPDDVNPVTK.E | 3            | CF057_HUMAN          |
| Q5VUM1                                                                 | 2             | 3.6162           | K.TSSSQGGKSELVK.Q              | 1            | CF057_HUMAN          |
| <b><i>UPF0384 protein CGI-117 - Homo sapiens (Human)</i></b>           |               |                  |                                |              |                      |

| <i>Accession No*</i>                                          | <i>Charge</i> | <i>XC(Max)**</i> | <i>Peptide*</i>                     | <i>TC***</i> | <i>Reference No*</i> |
|---------------------------------------------------------------|---------------|------------------|-------------------------------------|--------------|----------------------|
| Q9Y3C1                                                        | 2             | 2.9548           | R.DEKNYYQDTPK.Q                     | 1            | U384_HUMAN           |
| Q9Y3C1                                                        | 2             | 3.6928           | R.FYPAEWQDFLDSLQK.R                 | 3            | U384_HUMAN           |
| <b><i>UPF0404 protein C11orf59 - Homo sapiens (Human)</i></b> |               |                  |                                     |              |                      |
| Q6IAA8                                                        | 2             | 4.3882           | R.TDEQALLSSILAK.T                   | 2            | CK059_HUMAN          |
| <b><i>UPF0430 protein - Homo sapiens (Human)</i></b>          |               |                  |                                     |              |                      |
| Q9NWB6                                                        | 2             | 3.0033           | R.RVEELVAK.R                        | 2            | U430_HUMAN           |
| <b><i>UPF0449 protein C19orf25 - Homo sapiens (Human)</i></b> |               |                  |                                     |              |                      |
| Q9UFG5                                                        | 2             | 3.6301           | R.M#M#EDAEAPGEQLYQQSR.A             | 1            | CS025_HUMAN          |
| Q9UFG5                                                        | 2             | 4.3186           | R.AGEDLEREVAQMK.Q                   | 4            | CS025_HUMAN          |
| Q9UFG5                                                        | 2             | 2.8681           | R.LQQAGNVLR.Q                       | 3            | CS025_HUMAN          |
| Q9UFG5                                                        | 2             | 2.9931           | R.AGEDLEREVAQM#K.Q                  | 2            | CS025_HUMAN          |
| Q9UFG5                                                        | 2             | 4.6634           | R.MMEDAEAPGEQLYQQSR.A               | 5            | CS025_HUMAN          |
| Q9UFG5                                                        | 3             | 4.3584           | R.VLLPTRPAPPTVEQILEDVR.G            | 3            | CS025_HUMAN          |
| Q9UFG5                                                        | 1             | 2.1963           | R.AYVAANQR.L                        | 1            | CS025_HUMAN          |
| <b><i>UPF0452 protein C7orf41 - Homo sapiens (Human)</i></b>  |               |                  |                                     |              |                      |
| Q8N3F0                                                        | 3             | 6.7179           | K.SFRPLLGLPDADDDAFEYYSADVEEEEEPEADH | 2            | CG041_HUMAN          |
| <b><i>UPF0461 protein C5orf24 - Homo sapiens (Human)</i></b>  |               |                  |                                     |              |                      |
| Q7Z6I8                                                        | 2             | 2.9872           | R.AADQFDIYSSQQSK.Y                  | 2            | CE024_HUMAN          |
| <b><i>Uracil-DNA glycosylase - Homo sapiens (Human)</i></b>   |               |                  |                                     |              |                      |
| P13051                                                        | 3             | 4.8085           | K.KAPAGQEETGTPSSPLSAEQLDR.I         | 3            | UNG_HUMAN            |
| <b><i>Uromodulin precursor - Homo sapiens (Human)</i></b>     |               |                  |                                     |              |                      |
| P07911                                                        | 2             | 2.9179           | R.SGSVIDQSR.V                       | 1            | UROM_HUMAN           |
| P07911                                                        | 1             | 2.2264           | K.SLGFDK.V                          | 2            | UROM_HUMAN           |
| P07911                                                        | 2             | 4.0003           | K.TALQPM#VSALNIR.V                  | 5            | UROM_HUMAN           |
| P07911                                                        | 2             | 4.1997           | K.TALQPMVSALNIR.V                   | 6            | UROM_HUMAN           |
| P07911                                                        | 2             | 3.9563           | K.VFM#YLSDSR.C                      | 2            | UROM_HUMAN           |
| P07911                                                        | 1             | 2.4528           | K.YFIIQDR.C                         | 1            | UROM_HUMAN           |
| P07911                                                        | 2             | 3.0798           | R.FVGQGGAR.M                        | 8            | UROM_HUMAN           |
| P07911                                                        | 2             | 3.1493           | R.TLDEYWR.S                         | 6            | UROM_HUMAN           |
| P07911                                                        | 2             | 3.4342           | R.VGGTGM#FTVR.M                     | 1            | UROM_HUMAN           |
| P07911                                                        | 2             | 3.8132           | R.DWVSVVTPAR.D                      | 5            | UROM_HUMAN           |
| P07911                                                        | 2             | 4.7779           | R.DSTIQVVENGESSQGR.F                | 9            | UROM_HUMAN           |
| P07911                                                        | 2             | 3.8517           | R.VGGTGMFTVR.M                      | 6            | UROM_HUMAN           |

| <i>Accession No*</i>                                                                                | <i>Charge</i> | <i>XC(Max)**</i> | <i>Peptide*</i>                    | <i>TC***</i> | <i>Reference No*</i> |
|-----------------------------------------------------------------------------------------------------|---------------|------------------|------------------------------------|--------------|----------------------|
| P07911                                                                                              | 1             | 2.2135           | R.FSVQMFR.F                        | 1            | UROM_HUMAN           |
| P07911                                                                                              | 2             | 3.8685           | K.VFMYLSDSR.C                      | 9            | UROM_HUMAN           |
| <b><i>USP6 N-terminal-like protein - Homo sapiens (Human)</i></b>                                   |               |                  |                                    |              |                      |
| Q92738                                                                                              | 2             | 2.8689           | K.ALDAEDGKR.G                      | 1            | US6NL_HUMAN          |
| <b><i>Utrophin - Homo sapiens (Human)</i></b>                                                       |               |                  |                                    |              |                      |
| P46939                                                                                              | 2             | 3.2747           | R.STTELGENLQELR.D                  | 1            | UTRO_HUMAN           |
| <b><i>UV excision repair protein RAD23 homolog A - Homo sapiens (Human)</i></b>                     |               |                  |                                    |              |                      |
| P54725                                                                                              | 2             | 3.3402           | K.IRMEPDETVK.V                     | 3            | RD23A_HUMAN          |
| P54725                                                                                              | 2             | 3.5287           | K.GRDAFPVAGQK.L                    | 2            | RD23A_HUMAN          |
| P54725                                                                                              | 3             | 6.5488           | R.QVIQNPALLPALLQQLGQENPQLLQQISR.H  | 3            | RD23A_HUMAN          |
| P54725                                                                                              | 3             | 4.6415           | K.AGQGTSAPPEASPTAAPESSTSFPPAPTSGMS | 3            | RD23A_HUMAN          |
| P54725                                                                                              | 3             | 3.7272           | K.IEAEKGRDAFPVAGQK.L               | 1            | RD23A_HUMAN          |
| P54725                                                                                              | 2             | 2.7353           | R.ASYNNPHR.A                       | 1            | RD23A_HUMAN          |
| P54725                                                                                              | 3             | 4.6574           | R.EDKSPSEESAPTTSPESVSGSVSSGSSGR.E  | 1            | RD23A_HUMAN          |
| <b><i>UV excision repair protein RAD23 homolog B - Homo sapiens (Human)</i></b>                     |               |                  |                                    |              |                      |
| P54727                                                                                              | 2             | 3.0883           | R.AVEYLLMGIPGDR.E                  | 2            | RD23B_HUMAN          |
| P54727                                                                                              | 2             | 6.3631           | R.QIIQQNPSSLIPALLQQIGR.E           | 5            | RD23B_HUMAN          |
| P54727                                                                                              | 2             | 2.7514           | R.AVEYLLM#GIPGDR.E                 | 1            | RD23B_HUMAN          |
| P54727                                                                                              | 2             | 2.9846           | R.NQPQFQQMR.Q                      | 1            | RD23B_HUMAN          |
| <b><i>UV radiation resistance-associated gene protein - Homo sapiens (Human)</i></b>                |               |                  |                                    |              |                      |
| Q9P2Y5                                                                                              | 2             | 3.8328           | R.IYALNENVSSFR.R                   | 3            | UVRAG_HUMAN          |
| <b><i>Uveal autoantigen with coiled-coil domains and ankyrin repeats - Homo sapiens (Human)</i></b> |               |                  |                                    |              |                      |
| Q9BZF9                                                                                              | 2             | 3.2917           | R.NLENTQNQIK.A                     | 2            | UACA_HUMAN           |
| Q9BZF9                                                                                              | 2             | 4.5465           | K.QTSEILAVQNLLQK.Q                 | 2            | UACA_HUMAN           |
| <b><i>Vacuolar ATP synthase catalytic subunit A - Homo sapiens (Human)</i></b>                      |               |                  |                                    |              |                      |
| P38606                                                                                              | 3             | 3.744            | R.VGSHITGGDIYGIVSENSLIK.H          | 2            | VATA_HUMAN           |
| P38606                                                                                              | 2             | 2.8987           | K.FTMVQVWPVR.Q                     | 1            | VATA_HUMAN           |
| P38606                                                                                              | 2             | 2.8097           | K.LPANHPLLTGQR.V                   | 1            | VATA_HUMAN           |
| P38606                                                                                              | 2             | 3.6103           | R.AVETTAQSDNK.I                    | 4            | VATA_HUMAN           |
| P38606                                                                                              | 2             | 3.5169           | R.RAVETTAQSDNK.I                   | 2            | VATA_HUMAN           |
| P38606                                                                                              | 2             | 2.9516           | R.VGHSELVGEIIR.L                   | 1            | VATA_HUMAN           |
| P38606                                                                                              | 3             | 5.9416           | K.IKSDYAQLLEDMQNAFR.S              | 1            | VATA_HUMAN           |
| <b><i>Vacuolar ATP synthase subunit B, brain isoform - Homo sapiens (Human)</i></b>                 |               |                  |                                    |              |                      |

| <i>Accession No*</i>                                                                        | <i>Charge</i> | <i>XC(Max)**</i> | <i>Peptide*</i>                    | <i>TC***</i> | <i>Reference No*</i> |
|---------------------------------------------------------------------------------------------|---------------|------------------|------------------------------------|--------------|----------------------|
| P21281                                                                                      | 2             | 2.7985           | R.GIVNGAAPELPVPTGGPAVGAR.E         | 1            | VATB2_HUMAN          |
| <b><i>Vacuolar ATP synthase subunit D - Homo sapiens (Human)</i></b>                        |               |                  |                                    |              |                      |
| Q9Y5K8                                                                                      | 2             | 3.0573           | R.AAGEVLEPANLLAEEKDEDLLFE.-        | 1            | VATD_HUMAN           |
| <b><i>Vacuolar ATP synthase subunit d 1 - Homo sapiens (Human)</i></b>                      |               |                  |                                    |              |                      |
| P61421                                                                                      | 2             | 3.2113           | R.LYPEGLAQLAR.A                    | 2            | VA0D1_HUMAN          |
| <b><i>Vacuolar ATP synthase subunit E 1 - Homo sapiens (Human)</i></b>                      |               |                  |                                    |              |                      |
| P36543                                                                                      | 3             | 3.8233           | K.NDVVDVQIDQESYLPEDIAGGVEIYNGDRK.I | 1            | VATE1_HUMAN          |
| P36543                                                                                      | 2             | 5.5258           | R.ARDDLITDLLNEAK.Q                 | 2            | VATE1_HUMAN          |
| P36543                                                                                      | 2             | 3.4268           | R.GALFGANANR.K                     | 5            | VATE1_HUMAN          |
| P36543                                                                                      | 2             | 3.1093           | K.IQMSNLMNQAR.L                    | 2            | VATE1_HUMAN          |
| <b><i>Vacuolar ATP synthase subunit F - Homo sapiens (Human)</i></b>                        |               |                  |                                    |              |                      |
| Q16864                                                                                      | 4             | 5.1053           | R.HALDAHQQSIPAVLEIPSKEHPYDAAK.D    | 2            | VATF_HUMAN           |
| Q16864                                                                                      | 3             | 4.52             | R.HALDAHQQSIPAVLEIPSK.E            | 2            | VATF_HUMAN           |
| Q16864                                                                                      | 2             | 3.3679           | R.GMFTAEDLR.-                      | 6            | VATF_HUMAN           |
| Q16864                                                                                      | 3             | 3.8637           | K.NRHPNFLVVEK.D                    | 1            | VATF_HUMAN           |
| <b><i>Vacuolar ATP synthase subunit G 1 - Homo sapiens (Human)</i></b>                      |               |                  |                                    |              |                      |
| O75348                                                                                      | 2             | 4.3051           | K.QAKEEAQAEIEQYR.L                 | 3            | VATG1_HUMAN          |
| O75348                                                                                      | 2             | 3.7666           | K.EEAQAEIEQYR.L                    | 2            | VATG1_HUMAN          |
| O75348                                                                                      | 2             | 2.7435           | K.M#TILQTYFR.Q                     | 1            | VATG1_HUMAN          |
| O75348                                                                                      | 1             | 2.7595           | K.EAAALGSR.G                       | 4            | VATG1_HUMAN          |
| O75348                                                                                      | 2             | 3.7712           | K.MTILQTYFR.Q                      | 4            | VATG1_HUMAN          |
| O75348                                                                                      | 2             | 3.6873           | K.AKEAALGSR.G                      | 3            | VATG1_HUMAN          |
| <b><i>Vacuolar ATP synthase subunit H - Homo sapiens (Human)</i></b>                        |               |                  |                                    |              |                      |
| Q9UI12                                                                                      | 2             | 3.3792           | K.QLQSEQPQTAAAR.S                  | 1            | VATH_HUMAN           |
| <b><i>Vacuolar protein sorting 37 homolog C - Homo sapiens (Human)</i></b>                  |               |                  |                                    |              |                      |
| A5D8V6                                                                                      | 2             | 3.3333           | R.NLEFQGPLEISR.S                   | 1            | A5D8V6_HUMAN         |
| A5D8V6                                                                                      | 3             | 4.6091           | K.FLEGEVPLETFLENFSSM#R.M           | 1            | A5D8V6_HUMAN         |
| A5D8V6                                                                                      | 3             | 4.2123           | K.FLEGEVPLETFLENFSSMR.M            | 1            | A5D8V6_HUMAN         |
| <b><i>Vacuolar protein sorting-associated protein 72 homolog - Homo sapiens (Human)</i></b> |               |                  |                                    |              |                      |
| Q15906                                                                                      | 2             | 3.3901           | R.KVNTPAGSSQK.A                    | 2            | VPS72_HUMAN          |
| <b><i>Vacuolar protein-sorting-associated protein 25 - Homo sapiens (Human)</i></b>         |               |                  |                                    |              |                      |
| Q9BRG1                                                                                      | 2             | 3.4346           | R.ALQALQQEHK.A                     | 2            | VPS25_HUMAN          |
| Q9BRG1                                                                                      | 3             | 5.2922           | R.ALQALQQEHKAEIITVSDGR.G           | 2            | VPS25_HUMAN          |

| <i>Accession No*</i>                                                                                       | <i>Charge</i> | <i>XC(Max)**</i> | <i>Peptide*</i>              | <i>TC***</i> | <i>Reference No*</i> |
|------------------------------------------------------------------------------------------------------------|---------------|------------------|------------------------------|--------------|----------------------|
| <b><i>Valacyclovir hydrolase precursor - Homo sapiens (Human)</i></b>                                      |               |                  |                              |              |                      |
| Q86WA6                                                                                                     | 2             | 3.3468           | R.FADEFNKLAEDFLQ.-           | 1            | BPHL_HUMAN           |
| <b><i>Vascular endothelial growth factor receptor 2 precursor - Homo sapiens (Human)</i></b>               |               |                  |                              |              |                      |
| P35968                                                                                                     | 2             | 2.7278           | K.TFEDIPLEEPEVK.V            | 1            | VGFR2_HUMAN          |
| <b><i>Vasodilator-stimulated phosphoprotein - Homo sapiens (Human)</i></b>                                 |               |                  |                              |              |                      |
| P50552                                                                                                     | 3             | 5.9373           | K.VSKQEEASGGPTAPK.A          | 8            | VASP_HUMAN           |
| P50552                                                                                                     | 3             | 5.2098           | K.TPKDESANQEEPEAR.V          | 4            | VASP_HUMAN           |
| P50552                                                                                                     | 3             | 4.8698           | R.VKQELLEEVKK.E              | 1            | VASP_HUMAN           |
| P50552                                                                                                     | 2             | 3.9016           | R.SGGGGLMEEMNAMLAR.R         | 1            | VASP_HUMAN           |
| P50552                                                                                                     | 2             | 3.1779           | R.SGGGGLMEEMNAM#LAR.R        | 2            | VASP_HUMAN           |
| P50552                                                                                                     | 2             | 3.0433           | R.SGGGGLM#EEMNAMLAR.R        | 2            | VASP_HUMAN           |
| P50552                                                                                                     | 3             | 4.4693           | R.KVSKQEEASGGPTAPK.A         | 2            | VASP_HUMAN           |
| P50552                                                                                                     | 2             | 4.895            | K.VKEEIIIEAFVQELR.K          | 2            | VASP_HUMAN           |
| P50552                                                                                                     | 2             | 3.2897           | K.DESANQEEPEAR.V             | 3            | VASP_HUMAN           |
| <b><i>Vasorin precursor - Homo sapiens (Human)</i></b>                                                     |               |                  |                              |              |                      |
| Q6EMK4                                                                                                     | 2             | 4.5052           | R.LAGLGLQQLDEGLFSR.L         | 2            | VASN_HUMAN           |
| Q6EMK4                                                                                                     | 2             | 3.1716           | R.SLTLGIEPVSPTSLR.V          | 1            | VASN_HUMAN           |
| <b><i>Versican core protein precursor - Homo sapiens (Human)</i></b>                                       |               |                  |                              |              |                      |
| P13611                                                                                                     | 2             | 3.6313           | K.LLASDAGLYR.C               | 2            | CSPG2_HUMAN          |
| P13611                                                                                                     | 2             | 4.3634           | R.LATVGELQAAWR.N             | 4            | CSPG2_HUMAN          |
| P13611                                                                                                     | 2             | 3.6947           | R.AATSTRYTLNFEEAAQK.A        | 1            | CSPG2_HUMAN          |
| P13611                                                                                                     | 2             | 4.0062           | R.LGEPNYGAEIR.G              | 4            | CSPG2_HUMAN          |
| <b><i>Very long-chain specific acyl-CoA dehydrogenase, mitochondrial precursor - Homo sapiens (Hum</i></b> |               |                  |                              |              |                      |
| P49748                                                                                                     | 2             | 4.3138           | K.NPFGNAGLLLGEAGK.Q          | 1            | ACADV_HUMAN          |
| <b><i>Vesicle transport through interaction with t-SNAREs homolog 1B - Homo sapiens (Human)</i></b>        |               |                  |                              |              |                      |
| Q9UEU0                                                                                                     | 2             | 3.1018           | R.GLHEDLQGVPER.L             | 2            | VT11B_HUMAN          |
| Q9UEU0                                                                                                     | 3             | 4.528            | K.LIRDFDEKQQEANETLAEMEEELR.Y | 1            | VT11B_HUMAN          |
| Q9UEU0                                                                                                     | 2             | 3.5775           | R.LLGTAGTEEK.K               | 1            | VT11B_HUMAN          |
| <b><i>Vesicle-associated membrane protein 3 - Homo sapiens (Human)</i></b>                                 |               |                  |                              |              |                      |
| Q15836                                                                                                     | 2             | 5.3494           | R.LQQTQNVQDEVVDIMR.V         | 5            | VAMP3_HUMAN          |
| Q15836                                                                                                     | 2             | 4.3032           | R.LQQTQNVQDEVVDIM#R.V        | 1            | VAMP3_HUMAN          |
| Q15836                                                                                                     | 3             | 5.4557           | R.RLQQTQNVQDEVVDIMR.V        | 3            | VAMP3_HUMAN          |
| <b><i>Vesicle-associated membrane protein 8 - Homo sapiens (Human)</i></b>                                 |               |                  |                              |              |                      |

| <i>Accession No*</i>                                                                            | <i>Charge</i> | <i>XC(Max)**</i> | <i>Peptide*</i>                 | <i>TC***</i> | <i>Reference No*</i> |
|-------------------------------------------------------------------------------------------------|---------------|------------------|---------------------------------|--------------|----------------------|
| Q9BV40                                                                                          | 2             | 2.9547           | R.NLQSEVEGVK.N                  | 2            | VAMP8_HUMAN          |
| Q9BV40                                                                                          | 2             | 3.0891           | K.NIMTQNVER.I                   | 2            | VAMP8_HUMAN          |
| Q9BV40                                                                                          | 2             | 3.0385           | R.GENLEHLR.N                    | 2            | VAMP8_HUMAN          |
| <b><i>Vesicle-associated membrane protein-associated protein A - Homo sapiens (Human)</i></b>   |               |                  |                                 |              |                      |
| Q9P0L0                                                                                          | 3             | 4.4256           | K.FKGPFTDVVTTNLK.L              | 4            | VAPA_HUMAN           |
| Q9P0L0                                                                                          | 3             | 4.4701           | K.HEQILVLDPPTDLK.F              | 3            | VAPA_HUMAN           |
| <b><i>Vesicle-associated membrane protein-associated protein B/C - Homo sapiens (Human)</i></b> |               |                  |                                 |              |                      |
| O95292                                                                                          | 2             | 4.1355           | K.VEQVLSLEPQHELK.F              | 2            | VAPB_HUMAN           |
| O95292                                                                                          | 3             | 3.7017           | K.FM#VQSMFAPTDSDMEAVWK.E        | 1            | VAPB_HUMAN           |
| O95292                                                                                          | 2             | 5.0535           | K.FRGPFTDVVTTNLK.L              | 3            | VAPB_HUMAN           |
| <b><i>Vesicle-fusing ATPase - Homo sapiens (Human)</i></b>                                      |               |                  |                                 |              |                      |
| P46459                                                                                          | 2             | 3.5372           | R.VLDDGELLVQQTK.N               | 1            | NSF_HUMAN            |
| P46459                                                                                          | 2             | 4.3375           | K.NFSGAELEGLVR.A                | 1            | NSF_HUMAN            |
| <b><i>Vesicle-trafficking protein SEC22b - Homo sapiens (Human)</i></b>                         |               |                  |                                 |              |                      |
| O75396                                                                                          | 2             | 5.0406           | R.IMVANIEEVLQR.G                | 4            | SC22B_HUMAN          |
| O75396                                                                                          | 2             | 4.2655           | R.IM#VANIEEVLQR.G               | 1            | SC22B_HUMAN          |
| O75396                                                                                          | 3             | 5.2241           | R.IMVANIEEVLQRGEALSALDSK.A      | 4            | SC22B_HUMAN          |
| O75396                                                                                          | 2             | 2.8393           | R.DLQQYQSQAK.Q                  | 1            | SC22B_HUMAN          |
| <b><i>Vesicular integral-membrane protein VIP36 precursor - Homo sapiens (Human)</i></b>        |               |                  |                                 |              |                      |
| Q12907                                                                                          | 2             | 3.1995           | K.DNVDDPTGNFR.S                 | 1            | LMAN2_HUMAN          |
| <b><i>Vigilin - Homo sapiens (Human)</i></b>                                                    |               |                  |                                 |              |                      |
| Q00341                                                                                          | 2             | 4.0511           | K.VATLNSEEEEDPPTYK.D            | 2            | VIGLN_HUMAN          |
| Q00341                                                                                          | 2             | 2.9085           | K.GNSLQEILER.T                  | 1            | VIGLN_HUMAN          |
| <b><i>Villin-1 - Homo sapiens (Human)</i></b>                                                   |               |                  |                                 |              |                      |
| P09327                                                                                          | 3             | 4.4683           | R.KEEHLSIEDFTQAFGM#TPAAFSALPR.W | 1            | VILI_HUMAN           |
| P09327                                                                                          | 3             | 5.3142           | R.KEEHLSIEDFTQAFGMTPAAFSALPR.W  | 1            | VILI_HUMAN           |
| <b><i>Vimentin - Homo sapiens (Human)</i></b>                                                   |               |                  |                                 |              |                      |
| P08670                                                                                          | 2             | 3.3273           | R.DNLAEDIMR.L                   | 3            | VIME_HUMAN           |
| P08670                                                                                          | 2             | 3.3944           | R.DGQVINETSQHHDDLE.-            | 6            | VIME_HUMAN           |
| P08670                                                                                          | 2             | 3.7981           | R.LGDLYEEEM#R.E                 | 2            | VIME_HUMAN           |
| P08670                                                                                          | 3             | 4.7122           | R.VEVERDNLAEDIM#R.L             | 7            | VIME_HUMAN           |
| P08670                                                                                          | 3             | 3.7331           | K.VELQELNDRFANYIDKVR.F          | 1            | VIME_HUMAN           |
| P08670                                                                                          | 3             | 4.9194           | K.TVETRDGQVINETSQHHDDLE.-       | 6            | VIME_HUMAN           |



| <i>Accession No*</i> | <i>Charge</i> | <i>XC(Max)**</i> | <i>Peptide*</i>            | <i>TC***</i> | <i>Reference No*</i> |
|----------------------|---------------|------------------|----------------------------|--------------|----------------------|
| P08670               | 3             | 4.0633           | R.EKLQEEMLQREEAENTLQSFR.Q  | 2            | VIME_HUMAN           |
| P08670               | 2             | 3.223            | R.ETNLDSLPLVDTHSK.R        | 2            | VIME_HUMAN           |
| P08670               | 2             | 4.6449           | R.ETNLDSLPLVDTHSKR.T       | 5            | VIME_HUMAN           |
| P08670               | 1             | 3.4124           | R.FANYIDK.V                | 11           | VIME_HUMAN           |
| P08670               | 2             | 4.5161           | R.ISLPLPNFSSLNLR.E         | 9            | VIME_HUMAN           |
| P08670               | 2             | 4.2816           | K.ILLAELEQLK.G             | 9            | VIME_HUMAN           |
| P08670               | 2             | 3.8176           | R.FANYIDKVR.F              | 9            | VIME_HUMAN           |
| P08670               | 2             | 3.1018           | R.M#FGGPGTASR.P            | 1            | VIME_HUMAN           |
| P08670               | 2             | 4.9511           | K.ILLAELEQLKGQK.S          | 6            | VIME_HUMAN           |
| P08670               | 2             | 6.3244           | R.LLQDSVDFSLADAINTFK.N     | 67           | VIME_HUMAN           |
| P08670               | 2             | 3.6431           | R.RQVDQLTNDK.A             | 8            | VIME_HUMAN           |
| P08670               | 2             | 4.496            | R.SLYASSPGGVYATR.S         | 6            | VIME_HUMAN           |
| P08670               | 3             | 4.4877           | R.TNEKVELQELNDRFANYIDK.V   | 2            | VIME_HUMAN           |
| P08670               | 2             | 3.0306           | R.TYSLGSALRPSTSR.S         | 1            | VIME_HUMAN           |
| P08670               | 3             | 4.2997           | R.VEVERDNLAEDIMR.L         | 11           | VIME_HUMAN           |
| P08670               | 2             | 4.1182           | R.LGDLYEEEMR.E             | 4            | VIME_HUMAN           |
| P08670               | 2             | 4.6563           | K.SRLGDLYEEEMR.E           | 5            | VIME_HUMAN           |
| P08670               | 3             | 4.7106           | R.EKLQEEM#LQREEAENTLQSFR.Q | 2            | VIME_HUMAN           |
| P08670               | 3             | 5.0085           | R.RQVDQLTNDKAR.V           | 2            | VIME_HUMAN           |

***Vimentin-type IF-associated coiled-coil protein - Homo sapiens (Human)***

|        |   |        |              |   |              |
|--------|---|--------|--------------|---|--------------|
| Q2NL98 | 2 | 2.7062 | R.RAAELEAR.L | 1 | Q2NL98_HUMAN |
|--------|---|--------|--------------|---|--------------|

***Vinculin - Homo sapiens (Human)***

|        |   |        |                           |   |            |
|--------|---|--------|---------------------------|---|------------|
| P18206 | 2 | 4.2237 | K.AQQVSQGLDVLTAK.V        | 2 | VINC_HUMAN |
| P18206 | 2 | 5.3263 | K.AIPDLTAPVAAVQAAVSNLVR.V | 2 | VINC_HUMAN |
| P18206 | 2 | 3.5486 | R.DPSASPGDAGEQAIR.Q       | 3 | VINC_HUMAN |
| P18206 | 2 | 2.7846 | R.ALASQLQDSLK.D           | 1 | VINC_HUMAN |
| P18206 | 2 | 3.0194 | K.QVATALQNLQTK.T          | 1 | VINC_HUMAN |
| P18206 | 2 | 2.9339 | K.ELLPVLISAMK.I           | 2 | VINC_HUMAN |
| P18206 | 2 | 3.1745 | K.MSAEINEIIR.V            | 1 | VINC_HUMAN |

***Vinexin - Homo sapiens (Human)***

|        |   |        |                    |   |             |
|--------|---|--------|--------------------|---|-------------|
| O60504 | 2 | 4.5364 | R.SPADPTDLGGQTSR.R | 4 | VINEX_HUMAN |
|--------|---|--------|--------------------|---|-------------|

***Vitamin D-binding protein variant - Homo sapiens (Human)***

|        |   |        |                   |   |              |
|--------|---|--------|-------------------|---|--------------|
| Q53F31 | 2 | 3.1028 | K.AKLPEATPTELAK.L | 2 | Q53F31_HUMAN |
|--------|---|--------|-------------------|---|--------------|

***Vitronectin precursor - Homo sapiens (Human)***

| <i>Accession No*</i>                                                                     | <i>Charge</i> | <i>XC(Max)**</i> | <i>Peptide*</i>               | <i>TC***</i> | <i>Reference No*</i> |
|------------------------------------------------------------------------------------------|---------------|------------------|-------------------------------|--------------|----------------------|
| P04004                                                                                   | 2             | 3.7353           | R.FEDGVLDPDYPR.N              | 6            | VTNC_HUMAN           |
| P04004                                                                                   | 2             | 4.2816           | R.DVWGIEGPIDAAFTR.I           | 3            | VTNC_HUMAN           |
| P04004                                                                                   | 3             | 3.8147           | R.DWHGVPGQVDAAMAGR.I          | 1            | VTNC_HUMAN           |
| P04004                                                                                   | 2             | 3.8337           | R.IYISGMAPR.P                 | 3            | VTNC_HUMAN           |
| <b><i>Voltage-dependent anion-selective channel protein 1 - Homo sapiens (Human)</i></b> |               |                  |                               |              |                      |
| P21796                                                                                   | 2             | 3.2489           | R.WTEYGLTFTEK.W               | 2            | VDAC1_HUMAN          |
| <b><i>WAP four-disulfide core domain protein 12 precursor - Homo sapiens (Human)</i></b> |               |                  |                               |              |                      |
| Q8WWY7                                                                                   | 2             | 3.2338           | K.EGIEKAGVC*PADNVR.C          | 1            | WFD12_HUMAN          |
| <b><i>WAS/WASL-interacting protein family member 2 - Homo sapiens (Human)</i></b>        |               |                  |                               |              |                      |
| Q8TF74                                                                                   | 2             | 3.0162           | K.KVTNINDR.S                  | 4            | WIPF2_HUMAN          |
| Q8TF74                                                                                   | 2             | 3.3875           | R.TPAGPPPPPPPLR.N             | 1            | WIPF2_HUMAN          |
| Q8TF74                                                                                   | 3             | 4.622            | K.DGSENLAGKPALQIPSSR.A        | 5            | WIPF2_HUMAN          |
| Q8TF74                                                                                   | 1             | 2.1561           | K.VTNINDR.S                   | 2            | WIPF2_HUMAN          |
| Q8TF74                                                                                   | 3             | 4.688            | K.HSSSAPPPPPPGRR.A            | 1            | WIPF2_HUMAN          |
| Q8TF74                                                                                   | 2             | 4.1674           | K.GSSGGYGSQGAALQPK.G          | 4            | WIPF2_HUMAN          |
| Q8TF74                                                                                   | 2             | 4.7621           | R.TGPSGQSLAPPPPYR.Q           | 3            | WIPF2_HUMAN          |
| <b><i>WD repeat and HMG-box DNA-binding protein 1 - Homo sapiens (Human)</i></b>         |               |                  |                               |              |                      |
| O75717                                                                                   | 2             | 3.4837           | R.VVDESDETENQEEK.A            | 1            | WDHD1_HUMAN          |
| <b><i>WD repeat protein 22 - Homo sapiens (Human)</i></b>                                |               |                  |                               |              |                      |
| Q96JK2                                                                                   | 2             | 3.9227           | R.EDPTDTPATDSSR.A             | 4            | WDR22_HUMAN          |
| Q96JK2                                                                                   | 2             | 4.2811           | K.DGETSLVTGEADEGR.A           | 2            | WDR22_HUMAN          |
| <b><i>WD repeat protein 25 - Homo sapiens (Human)</i></b>                                |               |                  |                               |              |                      |
| Q64LD2                                                                                   | 3             | 4.3566           | K.DTSGVARPPGQDFASGTLDVPK.A    | 1            | WDR25_HUMAN          |
| <b><i>WD repeat protein 33 - Homo sapiens (Human)</i></b>                                |               |                  |                               |              |                      |
| Q9C0J8                                                                                   | 2             | 2.8855           | R.EMEAPGGPSEDR.G              | 1            | WDR33_HUMAN          |
| Q9C0J8                                                                                   | 3             | 4.8028           | R.HEQSGGPEHGPER.G             | 2            | WDR33_HUMAN          |
| Q9C0J8                                                                                   | 3             | 5.1847           | R.GRDGFPGPEDFGPEENFDASEEAAR.G | 1            | WDR33_HUMAN          |
| <b><i>WD repeat protein 42A - Homo sapiens (Human)</i></b>                               |               |                  |                               |              |                      |
| Q5TAQ9                                                                                   | 3             | 3.8959           | R.VHDRSEEEEEEEEEEEQPR.R       | 1            | WD42A_HUMAN          |
| Q5TAQ9                                                                                   | 2             | 4.7794           | R.SEEEEEEEEEEEEQPR.R          | 3            | WD42A_HUMAN          |
| <b><i>WD repeat protein 44 - Homo sapiens (Human)</i></b>                                |               |                  |                               |              |                      |
| Q5JSH3                                                                                   | 2             | 4.7275           | K.ELSDQATASPIVAR.T            | 4            | WDR44_HUMAN          |
| Q5JSH3                                                                                   | 2             | 5.066            | K.KIIESIIIESQK.V              | 3            | WDR44_HUMAN          |

| <i>Accession No*</i>                                                                  | <i>Charge</i> | <i>XC(Max)**</i> | <i>Peptide*</i>                | <i>TC***</i> | <i>Reference No*</i> |
|---------------------------------------------------------------------------------------|---------------|------------------|--------------------------------|--------------|----------------------|
| Q5JSH3                                                                                | 2             | 4.4312           | K.VLQLEDDSLDSK.G               | 4            | WDR44_HUMAN          |
| <b><i>WD repeat protein 57 - Homo sapiens (Human)</i></b>                             |               |                  |                                |              |                      |
| Q96DI7                                                                                | 2             | 3.4468           | R.KGPELPLVPVK.R                | 1            | WDR57_HUMAN          |
| <b><i>WD repeat protein 67 - Homo sapiens (Human)</i></b>                             |               |                  |                                |              |                      |
| Q96DN5                                                                                | 2             | 3.3761           | R.FLKLQQDQEMELRR.L             | 1            | WDR67_HUMAN          |
| <b><i>WD repeat protein 72 - Homo sapiens (Human)</i></b>                             |               |                  |                                |              |                      |
| Q3MJ13                                                                                | 2             | 3.1997           | K.FSEENDGIKR.Q                 | 2            | WDR72_HUMAN          |
| <b><i>WD repeat protein 8 - Homo sapiens (Human)</i></b>                              |               |                  |                                |              |                      |
| Q9P2S5                                                                                | 1             | 2.3205           | R.LAIC*TGGSR.L                 | 1            | WDR8_HUMAN           |
| <b><i>WD repeat protein 91 - Homo sapiens (Human)</i></b>                             |               |                  |                                |              |                      |
| A4D1P6                                                                                | 2             | 3.885            | R.LSPAQGPPQPQSSAK.K            | 2            | WDR91_HUMAN          |
| <b><i>Wilms tumor 1-associating protein - Homo sapiens (Human)</i></b>                |               |                  |                                |              |                      |
| Q15007                                                                                | 2             | 3.201            | R.STMVDPAINLFFLK.M             | 1            | WTAP_HUMAN           |
| <b><i>Wings apart-like protein homolog - Homo sapiens (Human)</i></b>                 |               |                  |                                |              |                      |
| Q7Z5K2                                                                                | 3             | 4.0296           | K.RPNFKPDIQEIPK.K              | 1            | WAPL_HUMAN           |
| Q7Z5K2                                                                                | 2             | 3.8601           | R.SMDEFTASTPADLGEAGR.L         | 2            | WAPL_HUMAN           |
| Q7Z5K2                                                                                | 3             | 5.2451           | K.KPNAETTVASEIKETNDTWNWSQFGK.R | 1            | WAPL_HUMAN           |
| <b><i>Wiskott-Aldrich syndrome protein - Homo sapiens (Human)</i></b>                 |               |                  |                                |              |                      |
| P42768                                                                                | 2             | 4.8254           | R.AGISEAQLTDAETSK.L            | 2            | WASP_HUMAN           |
| <b><i>Wiskott-Aldrich syndrome protein family member 2 - Homo sapiens (Human)</i></b> |               |                  |                                |              |                      |
| Q9Y6W5                                                                                | 2             | 2.8168           | R.SDLLSAIR.Q                   | 1            | WASF2_HUMAN          |
| <b><i>Wolframin - Homo sapiens (Human)</i></b>                                        |               |                  |                                |              |                      |
| O76024                                                                                | 2             | 3.1149           | R.DAAAPAEPQAQHTR.S             | 2            | WFS1_HUMAN           |
| <b><i>WUGSC:H_DJ0747G18.3 protein - Homo sapiens (Human)</i></b>                      |               |                  |                                |              |                      |
| Q9UDW8                                                                                | 2             | 4.0169           | R.VGEEDEEAAEAEAEAEAEER.A       | 1            | Q9UDW8_HUMAN         |
| <b><i>WW domain-binding protein 11 - Homo sapiens (Human)</i></b>                     |               |                  |                                |              |                      |
| Q9Y2W2                                                                                | 2             | 2.903            | R.DEDM#LYSPELAQR.G             | 3            | WBP11_HUMAN          |
| Q9Y2W2                                                                                | 2             | 3.2513           | K.ADDTSAATIEKK.A               | 2            | WBP11_HUMAN          |
| Q9Y2W2                                                                                | 3             | 7.472            | R.KPPGPPPGPPPPQVVQM#YGR.K      | 2            | WBP11_HUMAN          |
| Q9Y2W2                                                                                | 3             | 7.5947           | R.KPPGPPPGPPPPQVVQM#YGR.K      | 3            | WBP11_HUMAN          |
| Q9Y2W2                                                                                | 2             | 4.0944           | R.AQLSQYFDAVK.N                | 3            | WBP11_HUMAN          |

| <i>Accession No*</i>                                                                        | <i>Charge</i> | <i>XC(Max)**</i> | <i>Peptide*</i>           | <i>TC***</i> | <i>Reference No*</i> |
|---------------------------------------------------------------------------------------------|---------------|------------------|---------------------------|--------------|----------------------|
| Q9Y2W2                                                                                      | 2             | 3.0266           | K.SEDDSAVPLAK.A           | 2            | WBP11_HUMAN          |
| Q9Y2W2                                                                                      | 2             | 2.9649           | K.ELTPLQAMMLR.M           | 2            | WBP11_HUMAN          |
| <b><i>WW domain-binding protein 4 - Homo sapiens (Human)</i></b>                            |               |                  |                           |              |                      |
| O75554                                                                                      | 2             | 3.1399           | K.NSDGGSDPETQKEK.S        | 2            | WBP4_HUMAN           |
| <b><i>WW domain-containing adapter protein with coiled-coil - Homo sapiens (Human)</i></b>  |               |                  |                           |              |                      |
| Q9BTA9                                                                                      | 2             | 2.9833           | R.DAGDPSPPNK.M            | 1            | WAC_HUMAN            |
| <b><i>WW domain-containing transcription regulator protein 1 - Homo sapiens (Human)</i></b> |               |                  |                           |              |                      |
| Q9GZV5                                                                                      | 3             | 3.7793           | R.MRQEELMR.Q              | 1            | WWTR1_HUMAN          |
| <b><i>Xaa-Pro aminopeptidase 2 precursor - Homo sapiens (Human)</i></b>                     |               |                  |                           |              |                      |
| O43895                                                                                      | 2             | 3.1538           | K.GMFTSIEPGYYK.D          | 1            | XPP2_HUMAN           |
| <b><i>Xaa-Pro dipeptidase - Homo sapiens (Human)</i></b>                                    |               |                  |                           |              |                      |
| P12955                                                                                      | 2             | 4.2486           | K.VPLALFALNR.Q            | 4            | PEPD_HUMAN           |
| <b><i>YLP motif-containing protein 1 - Homo sapiens (Human)</i></b>                         |               |                  |                           |              |                      |
| P49750                                                                                      | 3             | 3.7359           | K.GPKPAFGQQHQQPK.S        | 1            | YLPM1_HUMAN          |
| P49750                                                                                      | 3             | 5.1222           | K.SQAEPLSGNKEPLADTSSNQK.N | 7            | YLPM1_HUMAN          |
| P49750                                                                                      | 3             | 4.368            | K.MKDFGSEPMADHLPPQESR.L   | 1            | YLPM1_HUMAN          |
| P49750                                                                                      | 2             | 2.8012           | K.TTVQQEPLGSAK.N          | 1            | YLPM1_HUMAN          |
| P49750                                                                                      | 2             | 3.7123           | R.VGFQYQGMQK.H            | 2            | YLPM1_HUMAN          |
| P49750                                                                                      | 2             | 3.2838           | R.RFEDLGSR.C              | 3            | YLPM1_HUMAN          |
| P49750                                                                                      | 3             | 3.8285           | R.QHLLSLQQR.T             | 1            | YLPM1_HUMAN          |
| <b><i>YTH domain family protein 1 - Homo sapiens (Human)</i></b>                            |               |                  |                           |              |                      |
| Q9BYJ9                                                                                      | 2             | 2.7182           | K.SGPVMGGGLPPPIK.H        | 1            | YTHD1_HUMAN          |
| Q9BYJ9                                                                                      | 2             | 4.0276           | K.APGMNSLEQGMVGLK.I       | 1            | YTHD1_HUMAN          |
| <b><i>YTH domain family protein 2 - Homo sapiens (Human)</i></b>                            |               |                  |                           |              |                      |
| Q9Y5A9                                                                                      | 2             | 3.8786           | K.LGSTEVASNVPK.V          | 2            | YTHD2_HUMAN          |
| <b><i>YTH domain family protein 3 - Homo sapiens (Human)</i></b>                            |               |                  |                           |              |                      |
| Q7Z739                                                                                      | 2             | 4.3904           | K.VPGISSIEQGMTGLK.I       | 4            | YTHD3_HUMAN          |
| Q7Z739                                                                                      | 2             | 5.6988           | R.AITDGQAGFGNDTLSK.V      | 4            | YTHD3_HUMAN          |
| Q7Z739                                                                                      | 2             | 4.2744           | K.HNMNIGTWDEK.G           | 4            | YTHD3_HUMAN          |
| Q7Z739                                                                                      | 2             | 2.9545           | K.HNM#NIGTWDEK.G          | 1            | YTHD3_HUMAN          |
| Q7Z739                                                                                      | 2             | 4.7102           | K.GNVGIGGSAVPPPIK.H       | 4            | YTHD3_HUMAN          |
| Q7Z739                                                                                      | 2             | 4.8113           | K.VPGISSIEQGM#TGLK.I      | 2            | YTHD3_HUMAN          |

| <i>Accession No*</i>                                                                    | <i>Charge</i> | <i>XC(Max)**</i> | <i>Peptide*</i>                    | <i>TC***</i> | <i>Reference No*</i> |
|-----------------------------------------------------------------------------------------|---------------|------------------|------------------------------------|--------------|----------------------|
| <b><i>YTH domain-containing protein 1 - Homo sapiens (Human)</i></b>                    |               |                  |                                    |              |                      |
| Q96MU7                                                                                  | 2             | 3.9897           | K.SATEYKNEEYQR.S                   | 1            | YTDC1_HUMAN          |
| Q96MU7                                                                                  | 2             | 2.9139           | R.RTQAVVSGR.R                      | 1            | YTDC1_HUMAN          |
| <b><i>YY1-associated factor 2 - Homo sapiens (Human)</i></b>                            |               |                  |                                    |              |                      |
| Q8IY57                                                                                  | 3             | 4.6184           | K.SPPASSAASADQHSQSGSSSDNTER.G      | 1            | YAF2_HUMAN           |
| Q8IY57                                                                                  | 3             | 4.2004           | K.TKSPPASSAASADQHSQSGSSSDNTER.G    | 2            | YAF2_HUMAN           |
| Q8IY57                                                                                  | 2             | 3.0088           | R.GEASSLNGESH.-                    | 1            | YAF2_HUMAN           |
| <b><i>Zinc finger and SCAN domain-containing protein 16 - Homo sapiens (Human)</i></b>  |               |                  |                                    |              |                      |
| Q9H4T2                                                                                  | 2             | 2.8974           | R.TKNEELFQKEDMPK.D                 | 2            | ZSC16_HUMAN          |
| <b><i>Zinc finger and SCAN domain-containing protein 18 - Homo sapiens (Human)</i></b>  |               |                  |                                    |              |                      |
| Q8TBC5                                                                                  | 2             | 3.5215           | R.AGGPPESVEGEAPPAPPEAQR.-          | 1            | ZSC18_HUMAN          |
| Q8TBC5                                                                                  | 2             | 3.85             | K.TEEDGPANTEQK.L                   | 4            | ZSC18_HUMAN          |
| <b><i>Zinc finger CCCH domain-containing protein 11A - Homo sapiens (Human)</i></b>     |               |                  |                                    |              |                      |
| O75152                                                                                  | 2             | 4.1535           | K.NLQEGNEVDSQSSIR.T                | 2            | ZC11A_HUMAN          |
| O75152                                                                                  | 3             | 4.5533           | R.VQQSSESSTSSPSQHEATPGAR.R         | 4            | ZC11A_HUMAN          |
| <b><i>Zinc finger CCCH domain-containing protein 13 - Homo sapiens (Human)</i></b>      |               |                  |                                    |              |                      |
| Q5T200                                                                                  | 2             | 2.7925           | R.NTEESSSPVRK.E                    | 1            | ZC313_HUMAN          |
| <b><i>Zinc finger CCCH domain-containing protein 5 - Homo sapiens (Human)</i></b>       |               |                  |                                    |              |                      |
| Q9C0B0                                                                                  | 2             | 2.9146           | K.KLQEELER.L                       | 2            | ZC3H5_HUMAN          |
| Q9C0B0                                                                                  | 3             | 4.0765           | R.KPPNLEGIVFPGESGLAPGSYKK.A        | 1            | ZC3H5_HUMAN          |
| <b><i>Zinc finger CCCH domain-containing protein 6 - Homo sapiens (Human)</i></b>       |               |                  |                                    |              |                      |
| P61129                                                                                  | 3             | 3.9174           | R.YQEDEEQTSTQPHR.A                 | 1            | ZC3H6_HUMAN          |
| <b><i>Zinc finger CCCH domain-containing protein C19orf7 - Homo sapiens (Human)</i></b> |               |                  |                                    |              |                      |
| Q9UPT8                                                                                  | 2             | 4.5718           | R.HVEASGGSGPGDSGSDPR.L             | 1            | CS007_HUMAN          |
| Q9UPT8                                                                                  | 2             | 4.0005           | K.ATEPAADTGAQPK.G                  | 2            | CS007_HUMAN          |
| Q9UPT8                                                                                  | 2             | 3.0745           | K.GSGPPPTEEEEGER.A                 | 2            | CS007_HUMAN          |
| Q9UPT8                                                                                  | 2             | 3.0054           | K.AGADGGTPTDR.Y                    | 4            | CS007_HUMAN          |
| Q9UPT8                                                                                  | 3             | 5.6488           | R.QRPGASTDSSTQGANLPDFELLSR.I       | 6            | CS007_HUMAN          |
| Q9UPT8                                                                                  | 3             | 6.9525           | R.LPLPDDREDGELEEGELEDGAEETQDTSGGP  | 2            | CS007_HUMAN          |
| Q9UPT8                                                                                  | 3             | 3.7415           | R.AAKPGPAEAPSPTASPSGDASPPATAPYDPR. | 1            | CS007_HUMAN          |
| <b><i>Zinc finger CCCH type antiviral protein 1 - Homo sapiens (Human)</i></b>          |               |                  |                                    |              |                      |
| Q7Z2W4                                                                                  | 2             | 4.4351           | K.ATDLGGTSQAGTSQR.F                | 2            | ZCC2_HUMAN           |

| <i>Accession No*</i>                                                               | <i>Charge</i> | <i>XC(Max)**</i> | <i>Peptide*</i>                   | <i>TC***</i> | <i>Reference No*</i> |
|------------------------------------------------------------------------------------|---------------|------------------|-----------------------------------|--------------|----------------------|
| Q7Z2W4                                                                             | 2             | 3.157            | K.SLTSWTNDQGAR.R                  | 4            | ZCC2_HUMAN           |
| Q7Z2W4                                                                             | 2             | 3.6592           | R.ASLEDAPVDDLTR.K                 | 3            | ZCC2_HUMAN           |
| Q7Z2W4                                                                             | 2             | 3.6651           | R.SSLGSLQTPEAVTTR.K               | 2            | ZCC2_HUMAN           |
| <b><i>Zinc finger CCHC domain-containing protein 3 - Homo sapiens (Human)</i></b>  |               |                  |                                   |              |                      |
| Q9NUD5                                                                             | 2             | 2.7159           | R.DPAGEAVDPR.K                    | 1            | ZCHC3_HUMAN          |
| <b><i>Zinc finger CCHC domain-containing protein 8 - Homo sapiens (Human)</i></b>  |               |                  |                                   |              |                      |
| Q6NZY4                                                                             | 2             | 3.0592           | K.LVNYPGFNISTPR.G                 | 1            | ZCHC8_HUMAN          |
| <b><i>Zinc finger CDGSH domain-containing protein 1 - Homo sapiens (Human)</i></b> |               |                  |                                   |              |                      |
| Q9NZ45                                                                             | 2             | 5.508            | K.HNEETGDNVGPLIIK.K               | 3            | ZCD1_HUMAN           |
| <b><i>Zinc finger FYVE domain-containing protein 16 - Homo sapiens (Human)</i></b> |               |                  |                                   |              |                      |
| Q7Z3T8                                                                             | 3             | 6.0903           | K.SLDLKDNDVIQDSSSALHVSSK.D        | 2            | ZFY16_HUMAN          |
| Q7Z3T8                                                                             | 2             | 3.8526           | K.DQECVNSCASSETS YGTNESSLNEK.T    | 2            | ZFY16_HUMAN          |
| Q7Z3T8                                                                             | 2             | 3.2061           | K.SILLQSLIEGM#EDR.K               | 1            | ZFY16_HUMAN          |
| Q7Z3T8                                                                             | 2             | 3.2326           | K.SQMNQIDMK.G                     | 2            | ZFY16_HUMAN          |
| Q7Z3T8                                                                             | 2             | 3.5337           | R.EQQNDTSSSELQNR.E                | 2            | ZFY16_HUMAN          |
| <b><i>Zinc finger FYVE domain-containing protein 19 - Homo sapiens (Human)</i></b> |               |                  |                                   |              |                      |
| Q96K21                                                                             | 3             | 4.6325           | R.VTLQDYRLPDSDDDEDEETAQR.V        | 1            | ZFY19_HUMAN          |
| <b><i>Zinc finger FYVE domain-containing protein 28 - Homo sapiens (Human)</i></b> |               |                  |                                   |              |                      |
| Q9HCC9                                                                             | 3             | 5.5437           | K.SPTSLDSAVATQEAASEPVAEGMDGGPHK.L | 1            | ZFY28_HUMAN          |
| <b><i>Zinc finger HIT domain-containing protein 4 - Homo sapiens (Human)</i></b>   |               |                  |                                   |              |                      |
| Q9C086                                                                             | 2             | 2.9476           | R.AWLDEDSNLSPSPLR.D               | 1            | ZNH14_HUMAN          |
| <b><i>Zinc finger MYM-type protein 4 - Homo sapiens (Human)</i></b>                |               |                  |                                   |              |                      |
| Q5VZL5                                                                             | 3             | 3.7398           | R.VTQHESDNENEIQNK.L               | 1            | Q5VZL5_HUMAN         |
| <b><i>Zinc finger protein 148 - Homo sapiens (Human)</i></b>                       |               |                  |                                   |              |                      |
| Q9UQR1                                                                             | 2             | 3.0058           | K.FLQQALDR.T                      | 2            | ZN148_HUMAN          |
| Q9UQR1                                                                             | 2             | 2.9702           | R.YLQAASNNR.E                     | 1            | ZN148_HUMAN          |
| Q9UQR1                                                                             | 2             | 3.1547           | K.QPLEQNQTISPSTYEESK.V            | 2            | ZN148_HUMAN          |
| Q9UQR1                                                                             | 2             | 2.7885           | K.QVYATMPINSFR.S                  | 1            | ZN148_HUMAN          |
| <b><i>Zinc finger protein 185 - Homo sapiens (Human)</i></b>                       |               |                  |                                   |              |                      |
| O15231                                                                             | 2             | 3.9596           | K.STGSPTQETQAPFIAK.R              | 4            | ZN185_HUMAN          |
| A4FTV3                                                                             | 2             | 2.8005           | K.STGPTQETQAPFIAK.R               | 1            | A4FTV3_HUMAN         |
| A4FTV3                                                                             | 3             | 4.14             | R.DLAGEEAFRAPNTDAAR.S             | 3            | A4FTV3_HUMAN         |

| <i>Accession No*</i>                                                | <i>Charge</i> | <i>XC(Max)**</i> | <i>Peptide*</i>                    | <i>TC***</i> | <i>Reference No*</i> |
|---------------------------------------------------------------------|---------------|------------------|------------------------------------|--------------|----------------------|
| A4FTV3                                                              | 2             | 4.4182           | R.GVFTKPIDSSSQPQQQFPK.A            | 1            | A4FTV3_HUMAN         |
| A4FTV3                                                              | 2             | 2.8984           | R.LVAPDVEGMR.S                     | 1            | A4FTV3_HUMAN         |
| A4FTV3                                                              | 3             | 5.2393           | R.SSAQLSDGNVSGGATGSRPEGLAAVDIGSER. | 3            | A4FTV3_HUMAN         |
| A4FTV3                                                              | 2             | 3.9966           | R.TANAGPPRPSSSGYK.M                | 2            | A4FTV3_HUMAN         |
| <b><i>Zinc finger protein 285A - Homo sapiens (Human)</i></b>       |               |                  |                                    |              |                      |
| Q17RJ3                                                              | 2             | 2.7043           | K.C*NVC*GKDFAYSSVLHHTQRVHTGEK.P    | 1            | Q17RJ3_HUMAN         |
| <b><i>Zinc finger protein 326 - Homo sapiens (Human)</i></b>        |               |                  |                                    |              |                      |
| Q5BKZ1                                                              | 2             | 3.3642           | R.ESVLTATSILNPIVK.A                | 1            | ZN326_HUMAN          |
| <b><i>Zinc finger protein 37 homolog - Homo sapiens (Human)</i></b> |               |                  |                                    |              |                      |
| A0AVJ9                                                              | 2             | 3.2737           | K.DDDQLENIQK.S                     | 1            | A0AVJ9_HUMAN         |
| A0AVJ9                                                              | 2             | 2.998            | K.VQKDDDDQLENIQKSQNK.L             | 2            | A0AVJ9_HUMAN         |
| <b><i>Zinc finger protein 428 - Homo sapiens (Human)</i></b>        |               |                  |                                    |              |                      |
| Q96B54                                                              | 2             | 3.9307           | R.ALGEEEEPPR.A                     | 6            | Q96B54_HUMAN         |
| <b><i>Zinc finger protein 503 - Homo sapiens (Human)</i></b>        |               |                  |                                    |              |                      |
| Q96F45                                                              | 2             | 3.7793           | K.EPGGGGGGGGGGGGGGGVSSSEK.S        | 2            | ZN503_HUMAN          |
| <b><i>Zinc finger protein 512B - Homo sapiens (Human)</i></b>       |               |                  |                                    |              |                      |
| Q96KM6                                                              | 2             | 3.2122           | K.AAGPASPPEEDPER.T                 | 2            | Z512B_HUMAN          |
| <b><i>Zinc finger protein 513 - Homo sapiens (Human)</i></b>        |               |                  |                                    |              |                      |
| Q86UZ3                                                              | 3             | 4.3323           | R.DSEGDSLGLARPLPYGLSDDESGGGR.A     | 1            | Q86UZ3_HUMAN         |
| <b><i>Zinc finger protein 598 - Homo sapiens (Human)</i></b>        |               |                  |                                    |              |                      |
| Q86UK7                                                              | 2             | 3.4699           | R.ASVAAQQQEEAR.R                   | 2            | ZN598_HUMAN          |
| <b><i>Zinc finger protein 638 - Homo sapiens (Human)</i></b>        |               |                  |                                    |              |                      |
| Q14966                                                              | 2             | 4.7872           | K.DVTVLSVAEEQDLLKQER.L             | 3            | ZN638_HUMAN          |
| Q14966                                                              | 2             | 3.0225           | R.RLPNLPQSR.N                      | 3            | ZN638_HUMAN          |
| Q14966                                                              | 2             | 5.0848           | K.AILQLDSPESAQSMYSFLK.Q            | 5            | ZN638_HUMAN          |
| Q14966                                                              | 3             | 6.5054           | R.NKETLGSEAVSSNVIDYGHASK.Y         | 2            | ZN638_HUMAN          |
| Q14966                                                              | 2             | 3.5014           | K.YGYTEDPLEVR.I                    | 2            | ZN638_HUMAN          |
| Q14966                                                              | 2             | 2.95             | K.NYQSQADIPIR.S                    | 1            | ZN638_HUMAN          |
| Q14966                                                              | 2             | 3.7104           | K.QSSVTQVTEQSPK.V                  | 3            | ZN638_HUMAN          |
| <b><i>Zinc finger protein 781 - Homo sapiens (Human)</i></b>        |               |                  |                                    |              |                      |
| Q8N8C0                                                              | 2             | 2.7735           | R.NLMNVRNVKR.L                     | 1            | ZN781_HUMAN          |
| <b><i>Zinc finger protein 787 - Homo sapiens (Human)</i></b>        |               |                  |                                    |              |                      |

| <i>Accession No*</i>                                                                     | <i>Charge</i> | <i>XC(Max)**</i> | <i>Peptide*</i>                 | <i>TC***</i> | <i>Reference No*</i> |
|------------------------------------------------------------------------------------------|---------------|------------------|---------------------------------|--------------|----------------------|
| Q6DD87                                                                                   | 2             | 3.6728           | R.AGGEEEDDDDEAAGGR.C            | 2            | ZN787_HUMAN          |
| <b><i>Zinc finger protein 91 homolog - Homo sapiens (Human)</i></b>                      |               |                  |                                 |              |                      |
| Q96JP5                                                                                   | 2             | 2.9429           | R.AAAAAAAAAAVSR.R               | 1            | ZFP91_HUMAN          |
| Q96JP5                                                                                   | 3             | 4.1214           | K.AAPEEPQQRPEAVAAAPAGTTSSR.V    | 3            | ZFP91_HUMAN          |
| <b><i>Zinc finger protein HRX - Homo sapiens (Human)</i></b>                             |               |                  |                                 |              |                      |
| Q03164                                                                                   | 2             | 4.2399           | R.LLGTPDIGSISNLLIK.A            | 2            | HRX_HUMAN            |
| <b><i>Zinc finger protein KIAA1802 - Homo sapiens (Human)</i></b>                        |               |                  |                                 |              |                      |
| Q96JM3                                                                                   | 3             | 3.8197           | K.AASDIWKPVLSIDTEPR.K           | 1            | K1802_HUMAN          |
| Q96JM3                                                                                   | 2             | 3.7263           | R.KPGPSGPSESPK.A                | 3            | K1802_HUMAN          |
| <b><i>Zinc finger protein with KRAB and SCAN domains 1 - Homo sapiens (Human)</i></b>    |               |                  |                                 |              |                      |
| P17029                                                                                   | 2             | 2.7029           | R.DSGPAIGK.D                    | 1            | ZKSC1_HUMAN          |
| <b><i>Zinc finger protein ZPR1 - Homo sapiens (Human)</i></b>                            |               |                  |                                 |              |                      |
| O75312                                                                                   | 3             | 5.1124           | R.TFDQNEELGLNDM#KTEGYEAGLAPQR.- | 1            | ZPR1_HUMAN           |
| O75312                                                                                   | 2             | 3.7992           | K.NPFTLGDSSNPQQTER.L            | 1            | ZPR1_HUMAN           |
| O75312                                                                                   | 2             | 3.4419           | R.AISGLEQDQPAR.R                | 2            | ZPR1_HUMAN           |
| <b><i>Zinc finger Ran-binding domain-containing protein 2 - Homo sapiens (Human)</i></b> |               |                  |                                 |              |                      |
| O95218                                                                                   | 3             | 5.1276           | K.EVEDKESEGEEDDEDLSK.Y          | 2            | ZRAB2_HUMAN          |
| O95218                                                                                   | 2             | 3.6483           | K.LDEDEDEDADLSK.Y               | 3            | ZRAB2_HUMAN          |
| O95218                                                                                   | 2             | 3.3113           | R.TGYGGGFNER.E                  | 3            | ZRAB2_HUMAN          |
| <b><i>Zinc finger RNA-binding protein - Homo sapiens (Human)</i></b>                     |               |                  |                                 |              |                      |
| Q96KR1                                                                                   | 2             | 4.2613           | K.AGYSQGATQYTQAQQTR.Q           | 2            | Q96KR1_HUMAN         |
| <b><i>Zinc transporter 9 - Homo sapiens (Human)</i></b>                                  |               |                  |                                 |              |                      |
| Q6PML9                                                                                   | 3             | 6.6062           | K.HGENIIDTLGAEVDRLEK.E          | 2            | ZNT9_HUMAN           |
| Q6PML9                                                                                   | 3             | 3.7705           | K.APLKQEPLQVR.V                 | 2            | ZNT9_HUMAN           |
| <b><i>Zyxin - Homo sapiens (Human)</i></b>                                               |               |                  |                                 |              |                      |
| Q15942                                                                                   | 2             | 4.0938           | K.VNPFPRGDSEPPPAPGAQR.A         | 2            | ZYX_HUMAN            |
| Q15942                                                                                   | 2             | 5.7131           | R.PSPAISVSVSAPAFYAPQK.K         | 2            | ZYX_HUMAN            |
| Q15942                                                                                   | 2             | 3.235            | K.FGPVVAPKPK.V                  | 3            | ZYX_HUMAN            |
