# Supplementary material
Source: PubMed Central journal article supplement (PMC3251958)
Supplement: NIHMS175878-supplement-6_si_006.pdf [file NIHMS175878-supplement-6_si_006.pdf]

## Table S-2b

**A list of 1,281 proteins identified in normal kidney by at least 2 protein-specific peptides, sorted by protein name.**

*\*MS/MS spectra were searched against the UniProt Human proteomic database; release 09/07.*

| <i>Accession No*</i> | <i>Protein Name*</i>                                                         | <i>Reference No*</i> |
|----------------------|------------------------------------------------------------------------------|----------------------|
| P61604               | 10 kDa heat shock protein, mitochondrial - Homo sapiens (Human)              | CH10_HUMAN           |
| Q9ULH1               | 130 kDa phosphatidylinositol 4,5-biphosphate-dependent ARF1 GTPase-activati  | DDEF1_HUMAN          |
| Q9NRX4               | 14 kDa phosphohistidine phosphatase - Homo sapiens (Human)                   | PHP14_HUMAN          |
| P31946               | 14-3-3 protein beta/alpha - Homo sapiens (Human)                             | 1433B_HUMAN          |
| P62258               | 14-3-3 protein epsilon - Homo sapiens (Human)                                | 1433E_HUMAN          |
| P61981               | 14-3-3 protein gamma - Homo sapiens (Human)                                  | 1433G_HUMAN          |
| P63104               | 14-3-3 protein zeta/delta - Homo sapiens (Human)                             | 1433Z_HUMAN          |
| Q9C0C2               | 182 kDa tankyrase 1-binding protein - Homo sapiens (Human)                   | TB182_HUMAN          |
| Q16698               | 2,4-dienoyl-CoA reductase, mitochondrial precursor - Homo sapiens (Human)    | DECR_HUMAN           |
| P35998               | 26S protease regulatory subunit 7 - Homo sapiens (Human)                     | PRS7_HUMAN           |
| O00233               | 26S proteasome non-ATPase regulatory subunit 9 - Homo sapiens (Human)        | PSMD9_HUMAN          |
| Q13442               | 28 kDa heat- and acid-stable phosphoprotein - Homo sapiens (Human)           | HAP28_HUMAN          |
| Q92665               | 28S ribosomal protein S31, mitochondrial precursor - Homo sapiens (Human)    | RT31_HUMAN           |
| P52815               | 39S ribosomal protein L12, mitochondrial precursor - Homo sapiens (Human)    | RM12_HUMAN           |
| Q9BUT1               | 3-hydroxybutyrate dehydrogenase type 2 - Homo sapiens (Human)                | BDH2_HUMAN           |
| P31937               | 3-hydroxyisobutyrate dehydrogenase, mitochondrial precursor - Homo sapiens ( | 3HIDH_HUMAN          |
| Q6NVY1               | 3-hydroxyisobutyryl-CoA hydrolase, mitochondrial precursor - Homo sapiens (H | HIBCH_HUMAN          |
| P42765               | 3-ketoacyl-CoA thiolase, mitochondrial - Homo sapiens (Human)                | THIM_HUMAN           |
| Q9H1C6               | 4.1G protein - Homo sapiens (Human)                                          | Q9H1C6_HUMAN         |
| P39019               | 40S ribosomal protein S19 - Homo sapiens (Human)                             | RS19_HUMAN           |
| P63220               | 40S ribosomal protein S21 - Homo sapiens (Human)                             | RS21_HUMAN           |
| P62851               | 40S ribosomal protein S25 - Homo sapiens (Human)                             | RS25_HUMAN           |
| P62857               | 40S ribosomal protein S28 - Homo sapiens (Human)                             | RS28_HUMAN           |
| P23396               | 40S ribosomal protein S3 - Homo sapiens (Human)                              | RS3_HUMAN            |
| P62861               | 40S ribosomal protein S30 - Homo sapiens (Human)                             | RS30_HUMAN           |
| P61247               | 40S ribosomal protein S3a - Homo sapiens (Human)                             | RS3A_HUMAN           |
| P46781               | 40S ribosomal protein S9 - Homo sapiens (Human)                              | RS9_HUMAN            |
| Q9BRK5               | 45 kDa calcium-binding protein precursor - Homo sapiens (Human)              | CAB45_HUMAN          |
| P80404               | 4-aminobutyrate aminotransferase, mitochondrial precursor - Homo sapiens (Hu | GABT_HUMAN           |
| P08195               | 4F2 cell-surface antigen heavy chain - Homo sapiens (Human)                  | 4F2_HUMAN            |

| <i>Accession No*</i> | <i>Protein Name*</i>                                                          | <i>Reference No*</i> |
|----------------------|-------------------------------------------------------------------------------|----------------------|
| P10809               | 60 kDa heat shock protein, mitochondrial precursor - Homo sapiens (Human)     | CH60_HUMAN           |
| P05387               | 60S acidic ribosomal protein P2 - Homo sapiens (Human)                        | RLA2_HUMAN           |
| P26373               | 60S ribosomal protein L13 - Homo sapiens (Human)                              | RL13_HUMAN           |
| P84098               | 60S ribosomal protein L19 - Homo sapiens (Human)                              | RL19_HUMAN           |
| P62829               | 60S ribosomal protein L23 - Homo sapiens (Human)                              | RL23_HUMAN           |
| P62750               | 60S ribosomal protein L23a - Homo sapiens (Human)                             | RL23A_HUMAN          |
| P83731               | 60S ribosomal protein L24 - Homo sapiens (Human)                              | RL24_HUMAN           |
| P63173               | 60S ribosomal protein L38 - Homo sapiens (Human)                              | RL38_HUMAN           |
| P36578               | 60S ribosomal protein L4 - Homo sapiens (Human)                               | RL4_HUMAN            |
| Q92667               | A kinase anchor protein 1, mitochondrial precursor - Homo sapiens (Human)     | AKAP1_HUMAN          |
| Q8IZP0               | Abl interactor 1 - Homo sapiens (Human)                                       | ABI1_HUMAN           |
| Q9Y4K1               | Absent in melanoma 1 protein - Homo sapiens (Human)                           | AIM1_HUMAN           |
| P39687               | Acidic leucine-rich nuclear phosphoprotein 32 family member A - Homo sapiens  | AN32A_HUMAN          |
| Q8N4X5               | Actin filament-associated protein 1-like 2 - Homo sapiens (Human)             | AF1L2_HUMAN          |
| O15143               | Actin-related protein 2/3 complex subunit 1B - Homo sapiens (Human)           | ARC1B_HUMAN          |
| P53999               | Activated RNA polymerase II transcriptional coactivator p15 - Homo sapiens (H | TCP4_HUMAN           |
| Q15650               | Activating signal cointegrator 1 - Homo sapiens (Human)                       | TRIP4_HUMAN          |
| Q9H2P0               | Activity-dependent neuroprotector - Homo sapiens (Human)                      | ADNP_HUMAN           |
| O14561               | Acyl carrier protein, mitochondrial precursor - Homo sapiens (Human)          | ACPM_HUMAN           |
| P25054               | Adenomatous polyposis coli protein - Homo sapiens (Human)                     | APC_HUMAN            |
| O60503               | Adenylate cyclase type 9 - Homo sapiens (Human)                               | ADCY9_HUMAN          |
| P54819               | Adenylate kinase isoenzyme 2, mitochondrial - Homo sapiens (Human)            | KAD2_HUMAN           |
| Q15847               | Adipose most abundant gene transcript 2 - Homo sapiens (Human)                | APM2_HUMAN           |
| Q9BW91               | ADP-ribose pyrophosphatase, mitochondrial precursor - Homo sapiens (Human)    | NUDT9_HUMAN          |
| Q8N6T3               | ADP-ribosylation factor GTPase-activating protein 1 - Homo sapiens (Human)    | ARFG1_HUMAN          |
| Q9NP61               | ADP-ribosylation factor GTPase-activating protein 3 - Homo sapiens (Human)    | ARFG3_HUMAN          |
| P36405               | ADP-ribosylation factor-like protein 3 - Homo sapiens (Human)                 | ARL3_HUMAN           |
| Q9UKK9               | ADP-sugar pyrophosphatase - Homo sapiens (Human)                              | NUDT5_HUMAN          |
| P10109               | Adrenodoxin, mitochondrial precursor - Homo sapiens (Human)                   | ADX_HUMAN            |
| P55196               | Afadin - Homo sapiens (Human)                                                 | AFAD_HUMAN           |
| Q6ULP2               | Aftiphilin - Homo sapiens (Human)                                             | AFTIN_HUMAN          |
| Q9BSE5               | Agmatinase, mitochondrial precursor - Homo sapiens (Human)                    | SPEB_HUMAN           |
| Q9BVU3               | AHNAK protein - Homo sapiens (Human)                                          | Q9BVU3_HUMAN         |

| <i>Accession No*</i> | <i>Protein Name*</i>                                                         | <i>Reference No*</i> |
|----------------------|------------------------------------------------------------------------------|----------------------|
| Q12802               | A-kinase anchor protein 13 - Homo sapiens (Human)                            | AKP13_HUMAN          |
| Q99996               | A-kinase anchor protein 9 - Homo sapiens (Human)                             | AKAP9_HUMAN          |
| P14550               | Alcohol dehydrogenase [NADP+] - Homo sapiens (Human)                         | AK1A1_HUMAN          |
| P02763               | Alpha-1-acid glycoprotein 1 precursor - Homo sapiens (Human)                 | A1AG1_HUMAN          |
| P19652               | Alpha-1-acid glycoprotein 2 precursor - Homo sapiens (Human)                 | A1AG2_HUMAN          |
| P01011               | Alpha-1-antichymotrypsin precursor - Homo sapiens (Human)                    | AACT_HUMAN           |
| P01009               | Alpha-1-antitrypsin precursor - Homo sapiens (Human)                         | A1AT_HUMAN           |
| P08697               | Alpha-2-antiplasmin precursor - Homo sapiens (Human)                         | A2AP_HUMAN           |
| P02765               | Alpha-2-HS-glycoprotein precursor - Homo sapiens (Human)                     | FETUA_HUMAN          |
| P01023               | Alpha-2-macroglobulin precursor - Homo sapiens (Human)                       | A2MG_HUMAN           |
| P30533               | Alpha-2-macroglobulin receptor-associated protein precursor - Homo sapiens ( | AMRP_HUMAN           |
| O43707               | Alpha-actinin-4 - Homo sapiens (Human)                                       | ACTN4_HUMAN          |
| P49419               | Alpha-aminoacidic semialdehyde dehydrogenase - Homo sapiens (Human)          | AL7A1_HUMAN          |
| P02511               | Alpha-crystallin B chain - Homo sapiens (Human)                              | CRYAB_HUMAN          |
| P06733               | Alpha-enolase - Homo sapiens (Human)                                         | ENOA_HUMAN           |
| P37840               | Alpha-synuclein - Homo sapiens (Human)                                       | SYUA_HUMAN           |
| P40222               | Alpha-taxilin - Homo sapiens (Human)                                         | TXLNA_HUMAN          |
| P02760               | AMBP protein precursor [Contains: Alpha-1-microglobulin - Homo sapiens (Hum  | AMBP_HUMAN           |
| Q03154               | Aminoacylase-1 - Homo sapiens (Human)                                        | ACY1_HUMAN           |
| P15144               | Aminopeptidase N - Homo sapiens (Human)                                      | AMPN_HUMAN           |
| Q9BXJ7               | Amnionless protein precursor - Homo sapiens (Human)                          | AMNLS_HUMAN          |
| Q02410               | Amyloid beta A4 precursor protein-binding family A member 1 - Homo sapiens ( | APBA1_HUMAN          |
| Q6FI81               | Anamorsin - Homo sapiens (Human)                                             | CPIN1_HUMAN          |
| Q8NHZ8               | Anaphase-promoting complex subunit CDC26 - Homo sapiens (Human)              | CDC26_HUMAN          |
| P01019               | Angiotensinogen precursor - Homo sapiens (Human)                             | ANGT_HUMAN           |
| Q08AC8               | ANK2 protein - Homo sapiens (Human)                                          | Q08AC8_HUMAN         |
| Q9P0K7               | Ankycorbin - Homo sapiens (Human)                                            | RAI14_HUMAN          |
| Q8N8V4               | Ankyrin repeat and SAM domain-containing protein 4B - Homo sapiens (Human)   | ANS4B_HUMAN          |
| Q68DC2               | Ankyrin repeat and SAM domain-containing protein 6 - Homo sapiens (Human)    | ANKS6_HUMAN          |
| Q63ZY3               | Ankyrin repeat domain-containing protein 25 - Homo sapiens (Human)           | ANR25_HUMAN          |
| Q5T7N3               | Ankyrin repeat domain-containing protein 38 - Homo sapiens (Human)           | ANR38_HUMAN          |
| Q6NY19               | Ankyrin repeat domain-containing protein 47 - Homo sapiens (Human)           | ANR47_HUMAN          |
| Q53LP3               | Ankyrin repeat domain-containing protein 57 - Homo sapiens (Human)           | ANR57_HUMAN          |

| <i>Accession No*</i> | <i>Protein Name*</i>                                                           | <i>Reference No*</i> |
|----------------------|--------------------------------------------------------------------------------|----------------------|
| P16157               | Ankyrin-1 - Homo sapiens (Human)                                               | ANK1_HUMAN           |
| Q01484               | Ankyrin-2 - Homo sapiens (Human)                                               | ANK2_HUMAN           |
| P08758               | Annexin A5 - Homo sapiens (Human)                                              | ANXA5_HUMAN          |
| Q9UMZ2               | AP1 subunit gamma-binding protein 1 - Homo sapiens (Human)                     | SYNG_HUMAN           |
| Q2M2I8               | AP2-associated protein kinase 1 - Homo sapiens (Human)                         | AAK1_HUMAN           |
| O14617               | AP-3 complex subunit delta-1 - Homo sapiens (Human)                            | AP3D1_HUMAN          |
| P02647               | Apolipoprotein A-I precursor - Homo sapiens (Human)                            | APOA1_HUMAN          |
| P02652               | Apolipoprotein A-II precursor - Homo sapiens (Human)                           | APOA2_HUMAN          |
| P06727               | Apolipoprotein A-IV precursor - Homo sapiens (Human)                           | APOA4_HUMAN          |
| P02649               | Apolipoprotein E precursor - Homo sapiens (Human)                              | APOE_HUMAN           |
| Q9BUR5               | Apolipoprotein O precursor - Homo sapiens (Human)                              | APOO_HUMAN           |
| Q6UXV4               | Apolipoprotein O-like precursor - Homo sapiens (Human)                         | APOOL_HUMAN          |
| Q9BZZ5               | Apoptosis inhibitor 5 - Homo sapiens (Human)                                   | API5_HUMAN           |
| Q13625               | Apoptosis-stimulating of p53 protein 2 - Homo sapiens (Human)                  | ASPP2_HUMAN          |
| Q9UKV3               | Apoptotic chromatin condensation inducer in the nucleus - Homo sapiens (Hum    | ACINU_HUMAN          |
| P53367               | Arfaptin-1 - Homo sapiens (Human)                                              | ARFP1_HUMAN          |
| O00192               | Armadillo repeat protein deleted in velo-cardio-facial syndrome - Homo sapiens | ARVC_HUMAN           |
| Q7L266               | Asparaginase-like protein 1 - Homo sapiens (Human)                             | Q7L266_HUMAN         |
| Q8WWM7               | Ataxin-2-like protein - Homo sapiens (Human)                                   | ATX2L_HUMAN          |
| Q8WYP5               | AT-hook-containing transcription factor 1 - Homo sapiens (Human)               | AHTF1_HUMAN          |
| O75947               | ATP synthase D chain, mitochondrial - Homo sapiens (Human)                     | ATP5H_HUMAN          |
| P30049               | ATP synthase delta chain, mitochondrial precursor - Homo sapiens (Human)       | ATPD_HUMAN           |
| P25705               | ATP synthase subunit alpha, mitochondrial precursor - Homo sapiens (Human)     | ATPA_HUMAN           |
| P06576               | ATP synthase subunit beta, mitochondrial precursor - Homo sapiens (Human)      | ATPB_HUMAN           |
| P18859               | ATP synthase-coupling factor 6, mitochondrial precursor - Homo sapiens (Hum    | ATP5J_HUMAN          |
| P13010               | ATP-dependent DNA helicase 2 subunit 2 - Homo sapiens (Human)                  | KU86_HUMAN           |
| O94762               | ATP-dependent DNA helicase Q5 - Homo sapiens (Human)                           | RECQ5_HUMAN          |
| Q08211               | ATP-dependent RNA helicase A - Homo sapiens (Human)                            | DHX9_HUMAN           |
| Q9NUU7               | ATP-dependent RNA helicase DDX19A - Homo sapiens (Human)                       | DD19A_HUMAN          |
| O14497               | AT-rich interactive domain-containing protein 1A - Homo sapiens (Human)        | ARI1A_HUMAN          |
| Q8NFD5               | AT-rich interactive domain-containing protein 1B - Homo sapiens (Human)        | ARI1B_HUMAN          |
| O95817               | BAG family molecular chaperone regulator 3 - Homo sapiens (Human)              | BAG3_HUMAN           |
| O95429               | BAG family molecular chaperone regulator 4 - Homo sapiens (Human)              | BAG4_HUMAN           |

| <i>Accession No*</i> | <i>Protein Name*</i>                                                             | <i>Reference No*</i> |
|----------------------|----------------------------------------------------------------------------------|----------------------|
| Q9H4G0               | Band 4.1-like protein 1 - Homo sapiens (Human)                                   | E41L1_HUMAN          |
| Q9Y2J2               | Band 4.1-like protein 3 - Homo sapiens (Human)                                   | E41L3_HUMAN          |
| O75531               | Barrier-to-autointegration factor - Homo sapiens (Human)                         | BAF_HUMAN            |
| Q8WZ55               | Barttin - Homo sapiens (Human)                                                   | BSND_HUMAN           |
| P98160               | Basement membrane-specific heparan sulfate proteoglycan core protein precursor   | PGBM_HUMAN           |
| P35613               | Basigin precursor - Homo sapiens (Human)                                         | BASI_HUMAN           |
| Q4VC05               | B-cell CLL/lymphoma 7 protein family member A - Homo sapiens (Human)             | BCL7A_HUMAN          |
| Q92934               | Bcl2 antagonist of cell death - Homo sapiens (Human)                             | BAD_HUMAN            |
| Q12983               | BCL2/adenovirus E1B 19 kDa protein-interacting protein 3 - Homo sapiens (Hu)     | BNIP3_HUMAN          |
| Q9NYF8               | Bcl-2-associated transcription factor 1 - Homo sapiens (Human)                   | BCLF1_HUMAN          |
| Q9B XK5              | Bcl-2-like 13 protein - Homo sapiens (Human)                                     | B2L13_HUMAN          |
| P02749               | Beta-2-glycoprotein 1 precursor - Homo sapiens (Human)                           | APOH_HUMAN           |
| Q9NSA3               | Beta-catenin-interacting protein 1 - Homo sapiens (Human)                        | CNBP1_HUMAN          |
| Q93088               | Betaine--homocysteine S-methyltransferase 1 - Homo sapiens (Human)               | BHMT1_HUMAN          |
| Q9NSY1               | BMP-2-inducible protein kinase - Homo sapiens (Human)                            | BMP2K_HUMAN          |
| Q9Y3E2               | BolA-like protein 1 - Homo sapiens (Human)                                       | BOLA1_HUMAN          |
| Q53S33               | BolA-like protein 3 - Homo sapiens (Human)                                       | BOLA3_HUMAN          |
| P80723               | Brain acid soluble protein 1 - Homo sapiens (Human)                              | BASP_HUMAN           |
| Q9UQB8               | Brain-specific angiogenesis inhibitor 1-associated protein 2 - Homo sapiens (Hu) | BAIP2_HUMAN          |
| P48539               | Brain-specific polypeptide PEP-19 - Homo sapiens (Human)                         | PEP19_HUMAN          |
| P11274               | Breakpoint cluster region protein - Homo sapiens (Human)                         | BCR_HUMAN            |
| Q9NW68               | BSD domain-containing protein 1 - Homo sapiens (Human)                           | BSDC1_HUMAN          |
| Q9NYQ6               | Cadherin EGF LAG seven-pass G-type receptor 1 precursor - Homo sapiens (H)       | CELR1_HUMAN          |
| Q9HCU4               | Cadherin EGF LAG seven-pass G-type receptor 2 precursor - Homo sapiens (H)       | CELR2_HUMAN          |
| P55290               | Cadherin-13 precursor - Homo sapiens (Human)                                     | CAD13_HUMAN          |
| O75309               | Cadherin-16 precursor - Homo sapiens (Human)                                     | CAD16_HUMAN          |
| P19022               | Cadherin-2 precursor - Homo sapiens (Human)                                      | CADH2_HUMAN          |
| P55285               | Cadherin-6 precursor - Homo sapiens (Human)                                      | CADH6_HUMAN          |
| Q9ULB4               | Cadherin-9 precursor - Homo sapiens (Human)                                      | CADH9_HUMAN          |
| P05937               | Calbindin - Homo sapiens (Human)                                                 | CALB1_HUMAN          |
| Q99653               | Calcium-binding protein p22 - Homo sapiens (Human)                               | CHP1_HUMAN           |
| Q9Y2V2               | Calcium-regulated heat stable protein 1 - Homo sapiens (Human)                   | CHSP1_HUMAN          |
| Q05682               | Caldesmon - Homo sapiens (Human)                                                 | CALD1_HUMAN          |

| <i>Accession No*</i> | <i>Protein Name*</i>                                                       | <i>Reference No*</i> |
|----------------------|----------------------------------------------------------------------------|----------------------|
| Q96JQ2               | Calmin - Homo sapiens (Human)                                              | CLMN_HUMAN           |
| P62158               | Calmodulin - Homo sapiens (Human)                                          | CALM_HUMAN           |
| P27482               | Calmodulin-like protein 3 - Homo sapiens (Human)                           | CALL3_HUMAN          |
| Q5T5Y3               | Calmodulin-regulated spectrin-associated protein 1. - Homo sapiens (Human) | Q5T5Y3_HUMAN         |
| P27824               | Calnexin precursor - Homo sapiens (Human)                                  | CALX_HUMAN           |
| P51911               | Calponin-1 - Homo sapiens (Human)                                          | CNN1_HUMAN           |
| Q99439               | Calponin-2 - Homo sapiens (Human)                                          | CNN2_HUMAN           |
| Q15417               | Calponin-3 - Homo sapiens (Human)                                          | CNN3_HUMAN           |
| P27797               | Calreticulin precursor - Homo sapiens (Human)                              | CALR_HUMAN           |
| O43852               | Calumenin precursor - Homo sapiens (Human)                                 | CALU_HUMAN           |
| P61925               | cAMP-dependent protein kinase inhibitor alpha - Homo sapiens (Human)       | IPKA_HUMAN           |
| Q9Y2B9               | cAMP-dependent protein kinase inhibitor gamma - Homo sapiens (Human)       | IPKG_HUMAN           |
| Q9UDT6               | CAP-Gly domain-containing linker protein 2 - Homo sapiens (Human)          | CLIP2_HUMAN          |
| P00915               | Carbonic anhydrase 1 - Homo sapiens (Human)                                | CAH1_HUMAN           |
| O43570               | Carbonic anhydrase 12 precursor - Homo sapiens (Human)                     | CAH12_HUMAN          |
| P00918               | Carbonic anhydrase 2 - Homo sapiens (Human)                                | CAH2_HUMAN           |
| P16152               | Carbonyl reductase [NADPH] 1 - Homo sapiens (Human)                        | CBR1_HUMAN           |
| O00748               | Carboxylesterase 2 precursor - Homo sapiens (Human)                        | EST2_HUMAN           |
| Q8WXE0               | Caskin-2 - Homo sapiens (Human)                                            | CSKI2_HUMAN          |
| P04040               | Catalase - Homo sapiens (Human)                                            | CATA_HUMAN           |
| P35221               | Catenin alpha-1 - Homo sapiens (Human)                                     | CTNA1_HUMAN          |
| P35222               | Catenin beta-1 - Homo sapiens (Human)                                      | CTNB1_HUMAN          |
| P07858               | Cathepsin B precursor - Homo sapiens (Human)                               | CATB_HUMAN           |
| P07339               | Cathepsin D precursor - Homo sapiens (Human)                               | CATD_HUMAN           |
| P07711               | Cathepsin L precursor - Homo sapiens (Human)                               | CATL_HUMAN           |
| P20645               | Cation-dependent mannose-6-phosphate receptor precursor - Homo sapiens (H  | MPRD_HUMAN           |
| P11717               | Cation-independent mannose-6-phosphate receptor precursor - Homo sapiens ( | MPRI_HUMAN           |
| O95400               | CD2 antigen cytoplasmic tail-binding protein 2 - Homo sapiens (Human)      | CD2B2_HUMAN          |
| Q9Y5K6               | CD2-associated protein - Homo sapiens (Human)                              | CD2AP_HUMAN          |
| P16070               | CD44 antigen precursor - Homo sapiens (Human)                              | CD44_HUMAN           |
| P48960               | CD97 antigen precursor - Homo sapiens (Human)                              | CD97_HUMAN           |
| Q00587               | Cdc42 effector protein 1 - Homo sapiens (Human)                            | BORG5_HUMAN          |
| Q9H3Q1               | Cdc42 effector protein 4 - Homo sapiens (Human)                            | BORG4_HUMAN          |

| <i>Accession No*</i> | <i>Protein Name*</i>                                                         | <i>Reference No*</i> |
|----------------------|------------------------------------------------------------------------------|----------------------|
| Q2M1Z3               | Cdc42 GTPase-activating protein - Homo sapiens (Human)                       | Q2M1Z3_HUMAN         |
| Q15642               | Cdc42-interacting protein 4 - Homo sapiens (Human)                           | CIP4_HUMAN           |
| Q9NXV6               | CDNA FLJ20036 fis, clone COL00219 - Homo sapiens (Human)                     | Q9NXV6_HUMAN         |
| Q6ZU35               | CDNA FLJ44026 fis, clone TEST14026762 - Homo sapiens (Human)                 | Q6ZU35_HUMAN         |
| Q6ZSR9               | CDNA FLJ45252 fis, clone BRHIP2011199 - Homo sapiens (Human)                 | Q6ZSR9_HUMAN         |
| Q6ZSI4               | CDNA FLJ45505 fis, clone BRTHA2020642, weakly similar to DRR1 protein - H    | Q6ZSI4_HUMAN         |
| Q6ZQN2               | CDNA FLJ46846 fis, clone UTERU3004635, moderately similar to Neuroblast di   | Q6ZQN2_HUMAN         |
| Q9H6G0               | CDNA: FLJ22312 fis, clone HRC05210. - Homo sapiens (Human)                   | Q9H6G0_HUMAN         |
| Q8NFZ8               | Cell adhesion molecule 4 precursor - Homo sapiens (Human)                    | CADM4_HUMAN          |
| Q9BV09               | Cell cycle associated protein 1 - Homo sapiens (Human)                       | Q9BV09_HUMAN         |
| Q99459               | Cell division cycle 5-like protein - Homo sapiens (Human)                    | CDC5L_HUMAN          |
| Q8IX12               | Cell division cycle and apoptosis regulator protein 1 - Homo sapiens (Human) | CCAR1_HUMAN          |
| P43121               | Cell surface glycoprotein MUC18 precursor - Homo sapiens (Human)             | MUC18_HUMAN          |
| P29762               | Cellular retinoic acid-binding protein 1 - Homo sapiens (Human)              | RABP1_HUMAN          |
| Q15057               | Centaurin-beta 2 - Homo sapiens (Human)                                      | CENB2_HUMAN          |
| P41208               | Centrin-2 - Homo sapiens (Human)                                             | CETN2_HUMAN          |
| P00450               | Ceruloplasmin precursor - Homo sapiens (Human)                               | CERU_HUMAN           |
| Q9Y3E9               | CGI-151 protein - Homo sapiens (Human)                                       | Q9Y3E9_HUMAN         |
| O43633               | Charged multivesicular body protein 2a - Homo sapiens (Human)                | CHM2A_HUMAN          |
| Q9UQN3               | Charged multivesicular body protein 2b - Homo sapiens (Human)                | CHM2B_HUMAN          |
| Q9H444               | Charged multivesicular body protein 4b - Homo sapiens (Human)                | CHM4B_HUMAN          |
| Q9NZZ3               | Charged multivesicular body protein 5 - Homo sapiens (Human)                 | CHMP5_HUMAN          |
| Q96S66               | Chloride channel CLIC-like protein 1 precursor - Homo sapiens (Human)        | CLCC1_HUMAN          |
| Q9Y696               | Chloride intracellular channel protein 4 - Homo sapiens (Human)              | CLIC4_HUMAN          |
| Q14D22               | Chromatin modifying protein 4A - Homo sapiens (Human)                        | Q14D22_HUMAN         |
| P83916               | Chromobox protein homolog 1 - Homo sapiens (Human)                           | CBX1_HUMAN           |
| Q13185               | Chromobox protein homolog 3 - Homo sapiens (Human)                           | CBX3_HUMAN           |
| P45973               | Chromobox protein homolog 5 - Homo sapiens (Human)                           | CBX5_HUMAN           |
| Q9P2M7               | Cingulin - Homo sapiens (Human)                                              | CING_HUMAN           |
| Q0VF96               | Cingulin-like protein 1 - Homo sapiens (Human)                               | Q0VF96_HUMAN         |
| O60271               | C-jun-amino-terminal kinase-interacting protein 4 - Homo sapiens (Human)     | JIP4_HUMAN           |
| Q14677               | Clathrin interactor 1 - Homo sapiens (Human)                                 | EPN4_HUMAN           |
| P09496               | Clathrin light chain A - Homo sapiens (Human)                                | CLCA_HUMAN           |

| <i>Accession No*</i> | <i>Protein Name*</i>                                                              | <i>Reference No*</i> |
|----------------------|-----------------------------------------------------------------------------------|----------------------|
| P09497               | Clathrin light chain B - Homo sapiens (Human)                                     | CLCB_HUMAN           |
| Q16630               | Cleavage and polyadenylation specificity factor 6 - Homo sapiens (Human)          | CPSF6_HUMAN          |
| P10909               | Clusterin precursor - Homo sapiens (Human)                                        | CLUS_HUMAN           |
| Q43598               | c-Myc-responsive protein Rcl - Homo sapiens (Human)                               | RCL_HUMAN            |
| Q14019               | Coactosin-like protein - Homo sapiens (Human)                                     | COTL1_HUMAN          |
| Q8IWL3               | Co-chaperone protein HscB, mitochondrial precursor - Homo sapiens (Human)         | HSC20_HUMAN          |
| P23528               | Cofilin-1 - Homo sapiens (Human)                                                  | COF1_HUMAN           |
| Q6P1N0               | Coiled-coil and C2 domain-containing protein 1A - Homo sapiens (Human)            | C2D1A_HUMAN          |
| Q5T0F9               | Coiled-coil and C2 domain-containing protein 1B - Homo sapiens (Human)            | C2D1B_HUMAN          |
| Q96CT7               | Coiled-coil domain-containing protein 124 - Homo sapiens (Human)                  | CC124_HUMAN          |
| Q6ZMI0               | Coiled-coil domain-containing protein 128 - Homo sapiens (Human)                  | CC128_HUMAN          |
| Q8IVM0               | Coiled-coil domain-containing protein 50 - Homo sapiens (Human)                   | CCD50_HUMAN          |
| Q9H0G5               | Coiled-coil domain-containing protein 55 - Homo sapiens (Human)                   | CCD55_HUMAN          |
| Q4VC31               | Coiled-coil domain-containing protein 58 - Homo sapiens (Human)                   | CCD58_HUMAN          |
| Q9Y2S6               | Coiled-coil domain-containing protein 72 - Homo sapiens (Human)                   | CCD72_HUMAN          |
| Q9H0W5               | Coiled-coil domain-containing protein 8 - Homo sapiens (Human)                    | CCDC8_HUMAN          |
| Q9Y3X0               | Coiled-coil domain-containing protein 9 - Homo sapiens (Human)                    | CCDC9_HUMAN          |
| Q7Z6B0               | Coiled-coil domain-containing protein 91 - Homo sapiens (Human)                   | CCD91_HUMAN          |
| Q9NX63               | Coiled-coil-helix-coiled-coil-helix domain-containing protein 3 - Homo sapiens (H | CHCH3_HUMAN          |
| Q9BRQ6               | Coiled-coil-helix-coiled-coil-helix domain-containing protein 6 - Homo sapiens (H | CHCH6_HUMAN          |
| Q9NYJ1               | Coiled-coil-helix-coiled-coil-helix domain-containing protein 8 - Homo sapiens (H | Q9NYJ1_HUMAN         |
| Q14011               | Cold-inducible RNA-binding protein - Homo sapiens (Human)                         | CIRBP_HUMAN          |
| P02452               | Collagen alpha-1(I) chain precursor - Homo sapiens (Human)                        | CO1A1_HUMAN          |
| P20908               | Collagen alpha-1(V) chain precursor - Homo sapiens (Human)                        | CO5A1_HUMAN          |
| P12109               | Collagen alpha-1(VI) chain precursor - Homo sapiens (Human)                       | CO6A1_HUMAN          |
| Q05707               | Collagen alpha-1(XIV) chain precursor - Homo sapiens (Human)                      | COEA1_HUMAN          |
| P39059               | Collagen alpha-1(XV) chain precursor [Contains: Endostatin - Homo sapiens (H      | COFA1_HUMAN          |
| Q07092               | Collagen alpha-1(XVI) chain precursor - Homo sapiens (Human)                      | COGA1_HUMAN          |
| P39060               | Collagen alpha-1(XVIII) chain precursor [Contains: Endostatin] - Homo sapiens     | COIA1_HUMAN          |
| P08123               | Collagen alpha-2(I) chain precursor - Homo sapiens (Human)                        | CO1A2_HUMAN          |
| P08572               | Collagen alpha-2(IV) chain precursor [Contains: Canstatin] - Homo sapiens (Hu     | CO4A2_HUMAN          |
| P12110               | Collagen alpha-2(VI) chain precursor - Homo sapiens (Human)                       | CO6A2_HUMAN          |
| P12111               | Collagen alpha-3(VI) chain precursor - Homo sapiens (Human)                       | CO6A3_HUMAN          |



| <i>Accession No*</i> | <i>Protein Name*</i>                                                            | <i>Reference No*</i> |
|----------------------|---------------------------------------------------------------------------------|----------------------|
| P01024               | Complement C3 precursor [Contains: Complement C3 beta chain; Complement         | CO3_HUMAN            |
| Q07021               | Complement component 1 Q subcomponent-binding protein, mitochondrial prec       | C1QBP_HUMAN          |
| P02748               | Complement component C9 precursor [Contains: Complement component C9a;          | CO9_HUMAN            |
| O14618               | Copper chaperone for superoxide dismutase - Homo sapiens (Human)                | CCS_HUMAN            |
| O00244               | Copper transport protein ATOX1 - Homo sapiens (Human)                           | ATOX1_HUMAN          |
| Q53SF7               | Cordon-bleu protein-like 1 - Homo sapiens (Human)                               | COBL1_HUMAN          |
| Q9ULV4               | Coronin-1C - Homo sapiens (Human)                                               | COR1C_HUMAN          |
| Q9UEE9               | Craniofacial development protein 1 - Homo sapiens (Human)                       | CFDP1_HUMAN          |
| P12277               | Creatine kinase B-type - Homo sapiens (Human)                                   | KCRB_HUMAN           |
| P46109               | Crk-like protein - Homo sapiens (Human)                                         | CRKL_HUMAN           |
| Q5IJ48               | Crumbs homolog 2 precursor - Homo sapiens (Human)                               | CRUM2_HUMAN          |
| Q9P2B4               | CTTNBP2 N-terminal-like protein - Homo sapiens (Human)                          | CT2NL_HUMAN          |
| O60494               | Cubilin precursor - Homo sapiens (Human)                                        | CUBN_HUMAN           |
| O14976               | Cyclin G-associated kinase - Homo sapiens (Human)                               | GAK_HUMAN            |
| P46527               | Cyclin-dependent kinase inhibitor 1B - Homo sapiens (Human)                     | CDN1B_HUMAN          |
| P04080               | Cystatin-B - Homo sapiens (Human)                                               | CYTB_HUMAN           |
| P01034               | Cystatin-C precursor - Homo sapiens (Human)                                     | CYTC_HUMAN           |
| Q16527               | Cysteine and glycine-rich protein 2 - Homo sapiens (Human)                      | CSRP2_HUMAN          |
| P52943               | Cysteine-rich protein 2 - Homo sapiens (Human)                                  | CRIP2_HUMAN          |
| P00167               | Cytochrome b5 - Homo sapiens (Human)                                            | CYB5_HUMAN           |
| P99999               | Cytochrome c - Homo sapiens (Human)                                             | CYC_HUMAN            |
| Q49B96               | Cytochrome c oxidase assembly protein COX19 - Homo sapiens (Human)              | COX19_HUMAN          |
| P14406               | Cytochrome c oxidase polypeptide VIIa-liver/heart, mitochondrial precursor - Ho | CX7A2_HUMAN          |
| P20674               | Cytochrome c oxidase subunit 5A, mitochondrial precursor - Homo sapiens (Hu     | COX5A_HUMAN          |
| P10606               | Cytochrome c oxidase subunit 5B, mitochondrial precursor - Homo sapiens (Hu     | COX5B_HUMAN          |
| P14854               | Cytochrome c oxidase subunit VIb isoform 1 - Homo sapiens (Human)               | CX6B1_HUMAN          |
| Q13409               | Cytoplasmic dynein 1 intermediate chain 2 - Homo sapiens (Human)                | DC1I2_HUMAN          |
| Q9Y6G9               | Cytoplasmic dynein 1 light intermediate chain 1 - Homo sapiens (Human)          | DC1L1_HUMAN          |
| O43237               | Cytoplasmic dynein 1 light intermediate chain 2 - Homo sapiens (Human)          | DC1L2_HUMAN          |
| Q17RY0               | Cytoplasmic polyadenylation element-binding protein 4 - Homo sapiens (Human)    | CPEB4_HUMAN          |
| O43639               | Cytoplasmic protein NCK2 - Homo sapiens (Human)                                 | NCK2_HUMAN           |
| P28838               | Cytosol aminopeptidase - Homo sapiens (Human)                                   | AMPL_HUMAN           |
| Q96KP4               | Cytosolic non-specific dipeptidase - Homo sapiens (Human)                       | CNDP2_HUMAN          |

| <i>Accession No*</i> | <i>Protein Name*</i>                                                          | <i>Reference No*</i> |
|----------------------|-------------------------------------------------------------------------------|----------------------|
| Q69YQ0               | Cytospin-A - Homo sapiens (Human)                                             | CYTSA_HUMAN          |
| Q5TDH0               | DDI1 homolog 2 - Homo sapiens (Human)                                         | DDI2_HUMAN           |
| P30046               | D-dopachrome decarboxylase - Homo sapiens (Human)                             | DOPD_HUMAN           |
| Q9BTC0               | Death-inducer obliterator 1 - Homo sapiens (Human)                            | DIDO1_HUMAN          |
| Q14185               | Dedicator of cytokinesis protein 1 - Homo sapiens (Human)                     | DOCK1_HUMAN          |
| Q9H7D0               | Dedicator of cytokinesis protein 5 - Homo sapiens (Human)                     | DOCK5_HUMAN          |
| P30038               | Delta-1-pyrroline-5-carboxylate dehydrogenase, mitochondrial precursor - Homo | AL4A1_HUMAN          |
| Q08495               | Dematin - Homo sapiens (Human)                                                | DEMA_HUMAN           |
| Q5VZ89               | DENN domain-containing protein 4C - Homo sapiens (Human)                      | DEN4C_HUMAN          |
| O00115               | Deoxyribonuclease-2-alpha precursor - Homo sapiens (Human)                    | DNS2A_HUMAN          |
| Q14126               | Desmoglein-2 precursor - Homo sapiens (Human)                                 | DSG2_HUMAN           |
| P15924               | Desmoplakin - Homo sapiens (Human)                                            | DESP_HUMAN           |
| O15061               | Desmuslin - Homo sapiens (Human)                                              | DMN_HUMAN            |
| Q96JH7               | Deubiquitinating protein VCIP135 - Homo sapiens (Human)                       | VCIP1_HUMAN          |
| O43150               | Development and differentiation-enhancing factor 2 - Homo sapiens (Human)     | DDEF2_HUMAN          |
| Q86XE5               | Dihydrodipicolinate synthase-like, mitochondrial precursor - Homo sapiens (Hu | DAPAL_HUMAN          |
| P09622               | Dihydrolipoyl dehydrogenase, mitochondrial precursor - Homo sapiens (Human)   | DLDH_HUMAN           |
| Q14117               | Dihydropyrimidinase - Homo sapiens (Human)                                    | DPYS_HUMAN           |
| Q3LXA3               | Dihydroxyacetone kinase - Homo sapiens (Human)                                | DAK_HUMAN            |
| Q6B011               | DIP2B protein - Homo sapiens (Human)                                          | Q6B011_HUMAN         |
| P16444               | Dipeptidase 1 precursor - Homo sapiens (Human)                                | DPEP1_HUMAN          |
| P27487               | Dipeptidyl peptidase 4 - Homo sapiens (Human)                                 | DPP4_HUMAN           |
| P98082               | Disabled homolog 2 - Homo sapiens (Human)                                     | DAB2_HUMAN           |
| Q5VWQ8               | Disabled homolog 2-interacting protein - Homo sapiens (Human)                 | DAB2P_HUMAN          |
| Q12959               | Disks large homolog 1 - Homo sapiens (Human)                                  | DLG1_HUMAN           |
| O00273               | DNA fragmentation factor subunit alpha - Homo sapiens (Human)                 | DFFA_HUMAN           |
| P18858               | DNA ligase 1 - Homo sapiens (Human)                                           | DNL1_HUMAN           |
| Q15054               | DNA polymerase subunit delta 3 - Homo sapiens (Human)                         | DPOD3_HUMAN          |
| P11387               | DNA topoisomerase 1 - Homo sapiens (Human)                                    | TOP1_HUMAN           |
| P16989               | DNA-binding protein A - Homo sapiens (Human)                                  | DBPA_HUMAN           |
| P24928               | DNA-directed RNA polymerase II subunit RPB1 - Homo sapiens (Human)            | RPB1_HUMAN           |
| P25685               | DnaJ homolog subfamily B member 1 - Homo sapiens (Human)                      | DNJB1_HUMAN          |
| Q8TBM8               | DnaJ homolog subfamily B member 14 - Homo sapiens (Human)                     | DJB14_HUMAN          |

| <i>Accession No*</i> | <i>Protein Name*</i>                                                            | <i>Reference No*</i> |
|----------------------|---------------------------------------------------------------------------------|----------------------|
| P25686               | DnaJ homolog subfamily B member 2 - Homo sapiens (Human)                        | DNJB2_HUMAN          |
| Q96KC8               | DnaJ homolog subfamily C member 1 - Homo sapiens (Human)                        | DNJC1_HUMAN          |
| Q9UKB3               | DnaJ homolog subfamily C member 12 - Homo sapiens (Human)                       | DJC12_HUMAN          |
| Q9NVM6               | DnaJ homolog subfamily C member 17 - Homo sapiens (Human)                       | DJC17_HUMAN          |
| O75937               | DnaJ homolog subfamily C member 8 - Homo sapiens (Human)                        | DNJC8_HUMAN          |
| Q9UHG0               | Doublecortin domain-containing protein 2 - Homo sapiens (Human)                 | DCDC2_HUMAN          |
| Q9NUL3               | Double-stranded RNA-binding protein Staufen homolog 2 - Homo sapiens (Hum       | STAU2_HUMAN          |
| P55265               | Double-stranded RNA-specific adenosine deaminase - Homo sapiens (Human)         | DSRAD_HUMAN          |
| Q9C005               | Dpy-30-like protein - Homo sapiens (Human)                                      | DPY30_HUMAN          |
| Q9UJU6               | Drebrin-like protein - Homo sapiens (Human)                                     | DBNL_HUMAN           |
| Q53H88               | Dynactin 2 variant - Homo sapiens (Human)                                       | Q53H88_HUMAN         |
| O00429               | Dynamin-1-like protein - Homo sapiens (Human)                                   | DNM1L_HUMAN          |
| Q6XZF7               | Dynamin-binding protein - Homo sapiens (Human)                                  | DNMBP_HUMAN          |
| Q14118               | Dystroglycan precursor - Homo sapiens (Human)                                   | DAG1_HUMAN           |
| Q96L91               | E1A-binding protein p400 - Homo sapiens (Human)                                 | EP400_HUMAN          |
| Q96A26               | E2-induced gene 5 protein - Homo sapiens (Human)                                | E2IG5_HUMAN          |
| P49792               | E3 SUMO-protein ligase RanBP2 - Homo sapiens (Human)                            | RBP2_HUMAN           |
| O43164               | E3 ubiquitin-protein ligase Praja2 - Homo sapiens (Human)                       | PJA2_HUMAN           |
| Q15075               | Early endosome antigen 1 - Homo sapiens (Human)                                 | EEA1_HUMAN           |
| O00423               | Echinoderm microtubule-associated protein-like 1 - Homo sapiens (Human)         | EMAL1_HUMAN          |
| Q9HC35               | Echinoderm microtubule-associated protein-like 4 - Homo sapiens (Human)         | EMAL4_HUMAN          |
| O75356               | Ectonucleoside triphosphate diphosphohydrolase 5 precursor - Homo sapiens (     | ENTP5_HUMAN          |
| Q9BUP0               | EF-hand domain-containing protein 1 - Homo sapiens (Human)                      | EFHD1_HUMAN          |
| Q9H4M9               | EH domain-containing protein 1 - Homo sapiens (Human)                           | EHD1_HUMAN           |
| Q9NZN3               | EH domain-containing protein 3 - Homo sapiens (Human)                           | EHD3_HUMAN           |
| Q9H223               | EH domain-containing protein 4 - Homo sapiens (Human)                           | EHD4_HUMAN           |
| Q15717               | ELAV-like protein 1 - Homo sapiens (Human)                                      | ELAV1_HUMAN          |
| Q9Y6R1               | Electrogenic sodium bicarbonate cotransporter 1 - Homo sapiens (Human)          | S4A4_HUMAN           |
| P13804               | Electron transfer flavoprotein subunit alpha, mitochondrial precursor - Homo sa | ETFA_HUMAN           |
| P38117               | Electron transfer flavoprotein subunit beta - Homo sapiens (Human)              | ETFB_HUMAN           |
| Q8IUD2               | ELKS/RAB6-interacting/CAST family member 1 - Homo sapiens (Human)               | RB6I2_HUMAN          |
| Q96CJ1               | ELL-associated factor 2 - Homo sapiens (Human)                                  | EAF2_HUMAN           |
| P24534               | Elongation factor 1-beta - Homo sapiens (Human)                                 | EF1B_HUMAN           |

| <i>Accession No*</i> | <i>Protein Name*</i>                                                             | <i>Reference No*</i> |
|----------------------|----------------------------------------------------------------------------------|----------------------|
| P49411               | Elongation factor Tu, mitochondrial precursor - Homo sapiens (Human)             | EFTU_HUMAN           |
| Q9Y6C2               | EMILIN-1 precursor - Homo sapiens (Human)                                        | EMIL1_HUMAN          |
| P17813               | Endoglin precursor - Homo sapiens (Human)                                        | EGLN_HUMAN           |
| P30040               | Endoplasmic reticulum protein ERp29 precursor - Homo sapiens (Human)             | ERP29_HUMAN          |
| P14625               | Endoplasmin precursor - Homo sapiens (Human)                                     | ENPL_HUMAN           |
| O60869               | Endothelial differentiation-related factor 1 - Homo sapiens (Human)              | EDF1_HUMAN           |
| Q6P2E9               | Enhancer of mRNA-decapping protein 4 - Homo sapiens (Human)                      | EDC4_HUMAN           |
| P30084               | Enoyl-CoA hydratase, mitochondrial precursor - Homo sapiens (Human)              | ECHM_HUMAN           |
| Q14244               | Ensconsin - Homo sapiens (Human)                                                 | MAP7_HUMAN           |
| P98172               | Ephrin-B1 precursor - Homo sapiens (Human)                                       | EFNB1_HUMAN          |
| P52799               | Ephrin-B2 precursor - Homo sapiens (Human)                                       | EFNB2_HUMAN          |
| Q12929               | Epidermal growth factor receptor kinase substrate 8 - Homo sapiens (Human)       | EPS8_HUMAN           |
| Q9H6S3               | Epidermal growth factor receptor kinase substrate 8-like protein 2 - Homo sapie  | ES8L2_HUMAN          |
| P61916               | Epididymal secretory protein E1 precursor - Homo sapiens (Human)                 | NPC2_HUMAN           |
| A0AVA9               | EPRS protein - Homo sapiens (Human)                                              | A0AVA9_HUMAN         |
| Q9Y6I3               | Epsin-1 - Homo sapiens (Human)                                                   | EPN1_HUMAN           |
| Q7Z5S1               | Erythrocyte membrane protein band 4.1 like 5 - Homo sapiens (Human)              | Q7Z5S1_HUMAN         |
| Q5T8W7               | Espin. - Homo sapiens (Human)                                                    | Q5T8W7_HUMAN         |
| Q9H0W9               | Ester hydrolase C11orf54 - Homo sapiens (Human)                                  | CK054_HUMAN          |
| P05198               | Eukaryotic translation initiation factor 2 subunit 1 - Homo sapiens (Human)      | IF2A_HUMAN           |
| P20042               | Eukaryotic translation initiation factor 2 subunit 2 - Homo sapiens (Human)      | IF2B_HUMAN           |
| Q9BY44               | Eukaryotic translation initiation factor 2A - Homo sapiens (Human)               | EIF2A_HUMAN          |
| O75822               | Eukaryotic translation initiation factor 3 subunit 1 - Homo sapiens (Human)      | IF31_HUMAN           |
| Q14152               | Eukaryotic translation initiation factor 3 subunit 10 - Homo sapiens (Human)     | IF3A_HUMAN           |
| O75821               | Eukaryotic translation initiation factor 3 subunit 4 - Homo sapiens (Human)      | IF34_HUMAN           |
| Q99613               | Eukaryotic translation initiation factor 3 subunit 8 - Homo sapiens (Human)      | IF38_HUMAN           |
| O43432               | Eukaryotic translation initiation factor 4 gamma 3 - Homo sapiens (Human)        | IF4G3_HUMAN          |
| Q4G0E3               | Eukaryotic translation initiation factor 4B - Homo sapiens (Human)               | Q4G0E3_HUMAN         |
| Q13542               | Eukaryotic translation initiation factor 4E-binding protein 2 - Homo sapiens (Hu | 4EBP2_HUMAN          |
| Q15056               | Eukaryotic translation initiation factor 4H - Homo sapiens (Human)               | IF4H_HUMAN           |
| P63241               | Eukaryotic translation initiation factor 5A-1 - Homo sapiens (Human)             | IF5A1_HUMAN          |
| O60841               | Eukaryotic translation initiation factor 5B - Homo sapiens (Human)               | IF2P_HUMAN           |
| P08294               | Extracellular superoxide dismutase [Cu-Zn] precursor - Homo sapiens (Human)      | SODE_HUMAN           |

| <i>Accession No*</i> | <i>Protein Name*</i>                                                           | <i>Reference No*</i> |
|----------------------|--------------------------------------------------------------------------------|----------------------|
| Q14745               | Ezrin-radixin-moesin-binding phosphoprotein 50 - Homo sapiens (Human)          | NHERF_HUMAN          |
| Q05CP7               | FABP1 protein - Homo sapiens (Human)                                           | Q05CP7_HUMAN         |
| P52907               | F-actin-capping protein subunit alpha-1 - Homo sapiens (Human)                 | CAZA1_HUMAN          |
| Q96AL1               | FAM44A protein - Homo sapiens (Human)                                          | Q96AL1_HUMAN         |
| Q86TK9               | Family with sequence similarity 39, member B - Homo sapiens (Human)            | Q86TK9_HUMAN         |
| Q96AE4               | Far upstream element-binding protein 1 - Homo sapiens (Human)                  | FUBP1_HUMAN          |
| Q92945               | Far upstream element-binding protein 2 - Homo sapiens (Human)                  | FUBP2_HUMAN          |
| Q96I24               | Far upstream element-binding protein 3 - Homo sapiens (Human)                  | FUBP3_HUMAN          |
| P05413               | Fatty acid-binding protein, heart - Homo sapiens (Human)                       | FABPH_HUMAN          |
| Q9Y4F1               | FERM, RhoGEF and pleckstrin domain-containing protein 1 - Homo sapiens (H      | FARP1_HUMAN          |
| P02794               | Ferritin heavy chain - Homo sapiens (Human)                                    | FRIH_HUMAN           |
| O95684               | FGFR1 oncogene partner - Homo sapiens (Human)                                  | FR1OP_HUMAN          |
| Q9NVK5               | FGFR1 oncogene partner 2 - Homo sapiens (Human)                                | FGOP2_HUMAN          |
| Q2V2M9               | FH1/FH2 domain-containing protein 3 - Homo sapiens (Human)                     | FHOD3_HUMAN          |
| P35555               | Fibrillin-1 precursor - Homo sapiens (Human)                                   | FBN1_HUMAN           |
| P02671               | Fibrinogen alpha chain precursor [Contains: Fibrinopeptide A] - Homo sapiens ( | FIBA_HUMAN           |
| Q14314               | Fibroleukin precursor - Homo sapiens (Human)                                   | FGL2_HUMAN           |
| P23142               | Fibulin-1 precursor - Homo sapiens (Human)                                     | FBLN1_HUMAN          |
| Q14315               | Filamin-C - Homo sapiens (Human)                                               | FLNC_HUMAN           |
| Q5T1M5               | FK506-binding protein 15 - Homo sapiens (Human)                                | Q5T1M5_HUMAN         |
| P26885               | FK506-binding protein 2 precursor - Homo sapiens (Human)                       | FKBP2_HUMAN          |
| Q00688               | FK506-binding protein 3 - Homo sapiens (Human)                                 | FKBP3_HUMAN          |
| Q02790               | FK506-binding protein 4 - Homo sapiens (Human)                                 | FKBP4_HUMAN          |
| Q9Y680               | FK506-binding protein 7 precursor - Homo sapiens (Human)                       | FKBP7_HUMAN          |
| Q8IY95               | FLJ38482 protein - Homo sapiens (Human)                                        | Q8IY95_HUMAN         |
| A5YM69               | FLJ43692 protein - Homo sapiens (Human)                                        | A5YM69_HUMAN         |
| Q12841               | Follistatin-related protein 1 precursor - Homo sapiens (Human)                 | FSTL1_HUMAN          |
| Q01167               | Forkhead box protein K2 - Homo sapiens (Human)                                 | FOXK2_HUMAN          |
| Q9NZ56               | Formin-2 - Homo sapiens (Human)                                                | FMN2_HUMAN           |
| Q5T0N5               | Formin-binding protein 1-like - Homo sapiens (Human)                           | FBP1L_HUMAN          |
| Q8N3X1               | Formin-binding protein 4 - Homo sapiens (Human)                                | FNBP4_HUMAN          |
| P51116               | Fragile X mental retardation syndrome-related protein 2 - Homo sapiens (Huma   | FXR2_HUMAN           |
| Q5SZK8               | FRAS1-related extracellular matrix protein 2 precursor - Homo sapiens (Human)  | FREM2_HUMAN          |

| <i>Accession No*</i> | <i>Protein Name*</i>                                                         | <i>Reference No*</i> |
|----------------------|------------------------------------------------------------------------------|----------------------|
| Q16595               | Frataxin, mitochondrial precursor - Homo sapiens (Human)                     | FRDA_HUMAN           |
| P09467               | Fructose-1,6-bisphosphatase 1 - Homo sapiens (Human)                         | F16P1_HUMAN          |
| P04075               | Fructose-bisphosphate aldolase A - Homo sapiens (Human)                      | ALDOA_HUMAN          |
| P05062               | Fructose-bisphosphate aldolase B - Homo sapiens (Human)                      | ALDOB_HUMAN          |
| Q9BQS8               | FYVE and coiled-coil domain-containing protein 1 - Homo sapiens (Human)      | FYCO1_HUMAN          |
| Q96M96               | FYVE, RhoGEF and PH domain-containing protein 4 - Homo sapiens (Human)       | FGD4_HUMAN           |
| Q6ZNL6               | FYVE, RhoGEF and PH domain-containing protein 5 - Homo sapiens (Human)       | FGD5_HUMAN           |
| Q6ZVF9               | G protein-regulated inducer of neurite outgrowth 3 - Homo sapiens (Human)    | GRIN3_HUMAN          |
| P09382               | Galectin-1 - Homo sapiens (Human)                                            | LEG1_HUMAN           |
| P05162               | Galectin-2 - Homo sapiens (Human)                                            | LEG2_HUMAN           |
| Q08380               | Galectin-3-binding protein precursor - Homo sapiens (Human)                  | LG3BP_HUMAN          |
| Q9UEY8               | Gamma-adducin - Homo sapiens (Human)                                         | ADDG_HUMAN           |
| P19440               | Gamma-glutamyltranspeptidase 1 precursor - Homo sapiens (Human)              | GGT1_HUMAN           |
| O76070               | Gamma-synuclein - Homo sapiens (Human)                                       | SYUG_HUMAN           |
| Q96RT7               | Gamma-tubulin complex component 6 - Homo sapiens (Human)                     | GCP6_HUMAN           |
| P17900               | Ganglioside GM2 activator precursor - Homo sapiens (Human)                   | SAP3_HUMAN           |
| O43716               | GatC-like protein - Homo sapiens (Human)                                     | GATCL_HUMAN          |
| O95210               | Genethonin-1 - Homo sapiens (Human)                                          | GET1_HUMAN           |
| Q9NQX3               | Gephyrin - Homo sapiens (Human)                                              | GEPH_HUMAN           |
| Q3V6T2               | Girdin - Homo sapiens (Human)                                                | GRDN_HUMAN           |
| P14136               | Glial fibrillary acidic protein - Homo sapiens (Human)                       | GFAP_HUMAN           |
| P04150               | Glucocorticoid receptor - Homo sapiens (Human)                               | GCR_HUMAN            |
| P14314               | Glucosidase 2 subunit beta precursor - Homo sapiens (Human)                  | GLU2B_HUMAN          |
| P00367               | Glutamate dehydrogenase 1, mitochondrial precursor - Homo sapiens (Human)    | DHE3_HUMAN           |
| O94925               | Glutaminase kidney isoform, mitochondrial precursor - Homo sapiens (Human)   | GLSK_HUMAN           |
| Q07075               | Glutamyl aminopeptidase - Homo sapiens (Human)                               | AMPE_HUMAN           |
| P35754               | Glutaredoxin-1 - Homo sapiens (Human)                                        | GLRX1_HUMAN          |
| Q86SX6               | Glutaredoxin-related protein 5 - Homo sapiens (Human)                        | GLRX5_HUMAN          |
| P07203               | Glutathione peroxidase 1 - Homo sapiens (Human)                              | GPX1_HUMAN           |
| P22352               | Glutathione peroxidase 3 precursor - Homo sapiens (Human)                    | GPX3_HUMAN           |
| P04406               | Glyceraldehyde-3-phosphate dehydrogenase - Homo sapiens (Human)              | G3P_HUMAN            |
| P21695               | Glycerol-3-phosphate dehydrogenase [NAD+], cytoplasmic - Homo sapiens (Hu    | GPDA_HUMAN           |
| P23434               | Glycine cleavage system H protein, mitochondrial precursor - Homo sapiens (H | GCSH_HUMAN           |

| <i>Accession No*</i> | <i>Protein Name*</i>                                                         | <i>Reference No*</i> |
|----------------------|------------------------------------------------------------------------------|----------------------|
| P30419               | Glycylpeptide N-tetradecanoyltransferase 1 - Homo sapiens (Human)            | NMT1_HUMAN           |
| O00461               | Golgi phosphoprotein 4 - Homo sapiens (Human)                                | GOLP4_HUMAN          |
| Q9H8Y8               | Golgi reassembly-stacking protein 2 - Homo sapiens (Human)                   | GORS2_HUMAN          |
| Q92805               | Golgin subfamily A member 1 - Homo sapiens (Human)                           | GOGA1_HUMAN          |
| Q08379               | Golgin subfamily A member 2 - Homo sapiens (Human)                           | GOGA2_HUMAN          |
| Q08378               | Golgin subfamily A member 3 - Homo sapiens (Human)                           | GOGA3_HUMAN          |
| Q13439               | Golgin subfamily A member 4 - Homo sapiens (Human)                           | GOGA4_HUMAN          |
| Q8TBA6               | Golgin subfamily A member 5 - Homo sapiens (Human)                           | GOGA5_HUMAN          |
| Q14789               | Golgin subfamily B member 1 - Homo sapiens (Human)                           | GGOB1_HUMAN          |
| Q13480               | GRB2-associated-binding protein 1 - Homo sapiens (Human)                     | GAB1_HUMAN           |
| Q12849               | G-rich sequence factor 1 - Homo sapiens (Human)                              | GRSF1_HUMAN          |
| Q8TAE8               | Growth arrest and DNA-damage-inducible proteins-interacting protein 1 - Homo | G45IP_HUMAN          |
| Q9HAV7               | GrpE protein homolog 1, mitochondrial precursor - Homo sapiens (Human)       | GRPE1_HUMAN          |
| Q8N6H7               | GTPase-activating protein ZNF289 - Homo sapiens (Human)                      | ZN289_HUMAN          |
| O60832               | H/ACA ribonucleoprotein complex subunit 4 - Homo sapiens (Human)             | DKC1_HUMAN           |
| Q9Y450               | HBS1-like protein - Homo sapiens (Human)                                     | HBS1L_HUMAN          |
| Q96BR5               | Hcp beta-lactamase-like protein C1orf163 - Homo sapiens (Human)              | CA163_HUMAN          |
| Q6NZ49               | HD domain containing 2 - Homo sapiens (Human)                                | Q6NZ49_HUMAN         |
| P34932               | Heat shock 70 kDa protein 4 - Homo sapiens (Human)                           | HSP74_HUMAN          |
| O95757               | Heat shock 70 kDa protein 4L - Homo sapiens (Human)                          | HS74L_HUMAN          |
| P11142               | Heat shock cognate 71 kDa protein - Homo sapiens (Human)                     | HSP7C_HUMAN          |
| Q00613               | Heat shock factor protein 1 - Homo sapiens (Human)                           | HSF1_HUMAN           |
| O75506               | Heat shock factor-binding protein 1 - Homo sapiens (Human)                   | HSBP1_HUMAN          |
| P04792               | Heat shock protein beta-1 - Homo sapiens (Human)                             | HSPB1_HUMAN          |
| O14558               | Heat shock protein beta-6 - Homo sapiens (Human)                             | HSPB6_HUMAN          |
| Q9UJY1               | Heat shock protein beta-8 - Homo sapiens (Human)                             | HSPB8_HUMAN          |
| Q9UK76               | Hematological and neurological expressed 1 protein - Homo sapiens (Human)    | HN1_HUMAN            |
| Q9H910               | Hematological and neurological expressed 1-like protein - Homo sapiens (Huma | HN1L_HUMAN           |
| P14317               | Hematopoietic lineage cell-specific protein - Homo sapiens (Human)           | HCLS1_HUMAN          |
| P30519               | Heme oxygenase 2 - Homo sapiens (Human)                                      | HMOX2_HUMAN          |
| Q9NRV9               | Heme-binding protein 1 - Homo sapiens (Human)                                | HEBP1_HUMAN          |
| P02790               | Hemopexin precursor - Homo sapiens (Human)                                   | HEMO_HUMAN           |
| O43504               | Hepatitis B virus X-interacting protein - Homo sapiens (Human)               | XIP_HUMAN            |

| <i>Accession No*</i> | <i>Protein Name*</i>                                                         | <i>Reference No*</i> |
|----------------------|------------------------------------------------------------------------------|----------------------|
| P20823               | Hepatocyte nuclear factor 1-alpha - Homo sapiens (Human)                     | HNF1A_HUMAN          |
| P35680               | Hepatocyte nuclear factor 1-beta - Homo sapiens (Human)                      | HNF1B_HUMAN          |
| P51858               | Hepatoma-derived growth factor - Homo sapiens (Human)                        | HDGF_HUMAN           |
| Q9Y3E1               | Hepatoma-derived growth factor-related protein 3 - Homo sapiens (Human)      | HDGR3_HUMAN          |
| Q9H290               | Hepatopoietin protein - Homo sapiens (Human)                                 | Q9H290_HUMAN         |
| Q99729               | Heterogeneous nuclear ribonucleoprotein A/B - Homo sapiens (Human)           | ROAA_HUMAN           |
| Q13151               | Heterogeneous nuclear ribonucleoprotein A0 - Homo sapiens (Human)            | ROA0_HUMAN           |
| P51991               | Heterogeneous nuclear ribonucleoprotein A3 - Homo sapiens (Human)            | ROA3_HUMAN           |
| Q14103               | Heterogeneous nuclear ribonucleoprotein D0 - Homo sapiens (Human)            | HNRPD_HUMAN          |
| O14979               | Heterogeneous nuclear ribonucleoprotein D-like - Homo sapiens (Human)        | HNRDL_HUMAN          |
| P52597               | Heterogeneous nuclear ribonucleoprotein F - Homo sapiens (Human)             | HNRPF_HUMAN          |
| P55795               | Heterogeneous nuclear ribonucleoprotein H' - Homo sapiens (Human)            | HNRH2_HUMAN          |
| P31942               | Heterogeneous nuclear ribonucleoprotein H3 - Homo sapiens (Human)            | HNRH3_HUMAN          |
| P14866               | Heterogeneous nuclear ribonucleoprotein L - Homo sapiens (Human)             | HNRPL_HUMAN          |
| P52272               | Heterogeneous nuclear ribonucleoprotein M - Homo sapiens (Human)             | HNRPM_HUMAN          |
| O60506               | Heterogeneous nuclear ribonucleoprotein Q - Homo sapiens (Human)             | HNRPQ_HUMAN          |
| Q00839               | Heterogeneous nuclear ribonucleoprotein U - Homo sapiens (Human)             | HNRPU_HUMAN          |
| Q9BUJ2               | Heterogeneous nuclear ribonucleoprotein U-like protein 1 - Homo sapiens (Hum | HNRL1_HUMAN          |
| Q1KMD3               | Heterogeneous nuclear ribonucleoprotein U-like protein 2 - Homo sapiens (Hum | HNRL2_HUMAN          |
| P22626               | Heterogeneous nuclear ribonucleoproteins A2/B1 - Homo sapiens (Human)        | ROA2_HUMAN           |
| P07910               | Heterogeneous nuclear ribonucleoproteins C1/C2 - Homo sapiens (Human)        | HNRPC_HUMAN          |
| O94992               | Hexamethylene bis-acetamide-inducible protein 1. - Homo sapiens (Human)      | O94992_HUMAN         |
| Q96MH2               | Hexamethylene bis-acetamide-inducible protein 2. - Homo sapiens (Human)      | Q96MH2_HUMAN         |
| Q15651               | High mobility group nucleosome-binding domain-containing protein 3 - Homo sa | HMGN3_HUMAN          |
| O00479               | High mobility group nucleosome-binding domain-containing protein 4 - Homo sa | HMGN4_HUMAN          |
| P26583               | High mobility group protein B2 - Homo sapiens (Human)                        | HMGB2_HUMAN          |
| Q9BW71               | HIRA-interacting protein 3 - Homo sapiens (Human)                            | HIRP3_HUMAN          |
| P49773               | Histidine triad nucleotide-binding protein 1 - Homo sapiens (Human)          | HINT1_HUMAN          |
| Q9BX68               | Histidine triad nucleotide-binding protein 2 - Homo sapiens (Human)          | HINT2_HUMAN          |
| P04196               | Histidine-rich glycoprotein precursor - Homo sapiens (Human)                 | HRG_HUMAN            |
| P07305               | Histone H1.0 - Homo sapiens (Human)                                          | H10_HUMAN            |
| Q92522               | Histone H1x - Homo sapiens (Human)                                           | H1X_HUMAN            |
| O43719               | HIV Tat-specific factor 1 - Homo sapiens (Human)                             | HTSF1_HUMAN          |



| <i>Accession No*</i> | <i>Protein Name*</i>                                                                            | <i>Reference No*</i> |
|----------------------|-------------------------------------------------------------------------------------------------|----------------------|
| P39880               | Homeobox protein cut-like 1 - Homo sapiens (Human)                                              | CUTL1_HUMAN          |
| P51610               | Host cell factor - Homo sapiens (Human)                                                         | HCFC1_HUMAN          |
| Q16543               | Hsp90 co-chaperone Cdc37 - Homo sapiens (Human)                                                 | CDC37_HUMAN          |
| Q2KHP4               | HSPA5 protein - Homo sapiens (Human)                                                            | Q2KHP4_HUMAN         |
| Q9P059               | HSPC323 - Homo sapiens (Human)                                                                  | Q9P059_HUMAN         |
| Q9NX55               | Huntingtin-interacting protein HYPK - Homo sapiens (Human)                                      | HYPK_HUMAN           |
| Q16836               | Hydroxyacyl-coenzyme A dehydrogenase, mitochondrial precursor - Homo sapiens (Human)            | HCDH_HUMAN           |
| Q9Y4L1               | Hypoxia up-regulated protein 1 precursor - Homo sapiens (Human)                                 | HYOU1_HUMAN          |
| Q8WZA9               | Immunity-related GTPase family Q protein - Homo sapiens (Human)                                 | IRGQ_HUMAN           |
| P01591               | Immunoglobulin J chain - Homo sapiens (Human)                                                   | IGJ_HUMAN            |
| O43615               | Import inner membrane translocase subunit TIM44, mitochondrial precursor - Homo sapiens (Human) | TIM44_HUMAN          |
| Q8NI35               | InaD-like protein - Homo sapiens (Human)                                                        | INADL_HUMAN          |
| Q9Y2U8               | Inner nuclear membrane protein Man1 - Homo sapiens (Human)                                      | MAN1_HUMAN           |
| P27987               | Inositol-trisphosphate 3-kinase B - Homo sapiens (Human)                                        | IP3KB_HUMAN          |
| P24592               | Insulin-like growth factor-binding protein 6 precursor - Homo sapiens (Human)                   | IBP6_HUMAN           |
| Q16270               | Insulin-like growth factor-binding protein 7 precursor - Homo sapiens (Human)                   | IBP7_HUMAN           |
| Q96CB8               | Integrator complex subunit 12 - Homo sapiens (Human)                                            | INT12_HUMAN          |
| P56199               | Integrin alpha-1 precursor - Homo sapiens (Human)                                               | ITA1_HUMAN           |
| P26006               | Integrin alpha-3 precursor - Homo sapiens (Human)                                               | ITA3_HUMAN           |
| P06756               | Integrin alpha-V precursor - Homo sapiens (Human)                                               | ITAV_HUMAN           |
| P13598               | Intercellular adhesion molecule 2 precursor - Homo sapiens (Human)                              | ICAM2_HUMAN          |
| Q53EL7               | Interferon regulatory factor 2-binding protein 1 - Homo sapiens (Human)                         | Q53EL7_HUMAN         |
| Q12906               | Interleukin enhancer-binding factor 3 - Homo sapiens (Human)                                    | ILF3_HUMAN           |
| Q9NZM3               | Intersectin-2 - Homo sapiens (Human)                                                            | ITSN2_HUMAN          |
| Q5JVS0               | Intracellular hyaluronan-binding protein 4 - Homo sapiens (Human)                               | HABP4_HUMAN          |
| Q9BQI0               | Ionized calcium-binding adapter molecule 2 - Homo sapiens (Human)                               | IBA2_HUMAN           |
| Q6DN90               | IQ motif and Sec7 domain-containing protein 1 - Homo sapiens (Human)                            | IQEC1_HUMAN          |
| Q86U28               | Iron-sulfur cluster assembly 2 homolog, mitochondrial precursor - Homo sapiens (Human)          | ISCA2_HUMAN          |
| Q9H1K1               | Iron-sulfur cluster assembly enzyme ISCU, mitochondrial precursor - Homo sapiens (Human)        | ISCU_HUMAN           |
| O75874               | Isocitrate dehydrogenase [NADP] cytoplasmic - Homo sapiens (Human)                              | IDHC_HUMAN           |
| Q96ST2               | IWS1 homolog - Homo sapiens (Human)                                                             | IWS1_HUMAN           |
| Q7LBC6               | JmjC domain-containing histone demethylation protein 2B - Homo sapiens (Human)                  | JHD2B_HUMAN          |
| P05783               | Keratin, type I cytoskeletal 18 - Homo sapiens (Human)                                          | K1C18_HUMAN          |

| <i>Accession No*</i> | <i>Protein Name*</i>                                                            | <i>Reference No*</i> |
|----------------------|---------------------------------------------------------------------------------|----------------------|
| P08727               | Keratin, type I cytoskeletal 19 - Homo sapiens (Human)                          | K1C19_HUMAN          |
| P35527               | Keratin, type I cytoskeletal 9 - Homo sapiens (Human)                           | K1C9_HUMAN           |
| P04264               | Keratin, type II cytoskeletal 1 - Homo sapiens (Human)                          | K2C1_HUMAN           |
| P35908               | Keratin, type II cytoskeletal 2 epidermal - Homo sapiens (Human)                | K22E_HUMAN           |
| P13647               | Keratin, type II cytoskeletal 5 - Homo sapiens (Human)                          | K2C5_HUMAN           |
| P08729               | Keratin, type II cytoskeletal 7 - Homo sapiens (Human)                          | K2C7_HUMAN           |
| P05787               | Keratin, type II cytoskeletal 8 - Homo sapiens (Human)                          | K2C8_HUMAN           |
| Q07666               | KH domain-containing, RNA-binding, signal transduction-associated protein 1 -   | SAM68_HUMAN          |
| A1L4N4               | KIDINS220 protein - Homo sapiens (Human)                                        | A1L4N4_HUMAN         |
| Q96J84               | Kin of IRRE-like protein 1 precursor - Homo sapiens (Human)                     | KIRR1_HUMAN          |
| Q86UP2               | Kinectin - Homo sapiens (Human)                                                 | KTN1_HUMAN           |
| P33176               | Kinesin heavy chain - Homo sapiens (Human)                                      | KINH_HUMAN           |
| Q9NQT8               | Kinesin-like protein KIF13B - Homo sapiens (Human)                              | KI13B_HUMAN          |
| Q7Z4S6               | Kinesin-like protein KIF21A - Homo sapiens (Human)                              | KI21A_HUMAN          |
| Q04760               | Lactoylglutathione lyase - Homo sapiens (Human)                                 | LGUL_HUMAN           |
| Q96GD8               | Ladinin 1 - Homo sapiens (Human)                                                | Q96GD8_HUMAN         |
| P02545               | Lamin-A/C - Homo sapiens (Human)                                                | LMNA_HUMAN           |
| P20700               | Lamin-B1 - Homo sapiens (Human)                                                 | LMNB1_HUMAN          |
| Q03252               | Lamin-B2 - Homo sapiens (Human)                                                 | LMNB2_HUMAN          |
| Q16363               | Laminin subunit alpha-4 precursor - Homo sapiens (Human)                        | LAMA4_HUMAN          |
| O15230               | Laminin subunit alpha-5 precursor - Homo sapiens (Human)                        | LAMA5_HUMAN          |
| P07942               | Laminin subunit beta-1 precursor - Homo sapiens (Human)                         | LAMB1_HUMAN          |
| P11047               | Laminin subunit gamma-1 precursor - Homo sapiens (Human)                        | LAMC1_HUMAN          |
| Q6PKG0               | La-related protein 1 - Homo sapiens (Human)                                     | LARP1_HUMAN          |
| Q71RC2               | La-related protein 4 - Homo sapiens (Human)                                     | LARP4_HUMAN          |
| P46379               | Large proline-rich protein BAT3 - Homo sapiens (Human)                          | BAT3_HUMAN           |
| Q14767               | Latent-transforming growth factor beta-binding protein 2 precursor - Homo sapie | LTBP2_HUMAN          |
| Q8NC56               | LEM domain-containing protein 2 - Homo sapiens (Human)                          | LEMD2_HUMAN          |
| Q86V48               | Leucine zipper protein 1 - Homo sapiens (Human)                                 | LUZP1_HUMAN          |
| O95202               | Leucine zipper-EF-hand-containing transmembrane protein 1, mitochondrial pre    | LETM1_HUMAN          |
| P02750               | Leucine-rich alpha-2-glycoprotein precursor - Homo sapiens (Human)              | A2GL_HUMAN           |
| Q96II8               | Leucine-rich repeat and calponin homology domain-containing protein 3 precurs   | LRCH3_HUMAN          |
| Q32MZ4               | Leucine-rich repeat flightless-interacting protein 1 - Homo sapiens (Human)     | LRRF1_HUMAN          |

| <i>Accession No*</i> | <i>Protein Name*</i>                                                            | <i>Reference No*</i> |
|----------------------|---------------------------------------------------------------------------------|----------------------|
| Q9Y608               | Leucine-rich repeat flightless-interacting protein 2 - Homo sapiens (Human)     | LRRF2_HUMAN          |
| Q96AG4               | Leucine-rich repeat-containing protein 59 - Homo sapiens (Human)                | LRC59_HUMAN          |
| Q9UIQ6               | Leucyl-cystinyl aminopeptidase - Homo sapiens (Human)                           | LCAP_HUMAN           |
| Q9UPQ0               | LIM and calponin homology domains-containing protein 1 - Homo sapiens (Hum      | LIMC1_HUMAN          |
| Q14847               | LIM and SH3 domain protein 1 - Homo sapiens (Human)                             | LASP1_HUMAN          |
| Q8WWI1               | LIM domain only protein 7 - Homo sapiens (Human)                                | LMO7_HUMAN           |
| Q9UGP4               | LIM domain-containing protein 1 - Homo sapiens (Human)                          | LIMD1_HUMAN          |
| Q70I54               | LIM-nebulette - Homo sapiens (Human)                                            | Q70I54_HUMAN         |
| Q92539               | Lipin-2 - Homo sapiens (Human)                                                  | LPIN2_HUMAN          |
| Q86X29               | Lipolysis-stimulated lipoprotein receptor - Homo sapiens (Human)                | LSR_HUMAN            |
| Q93052               | Lipoma-preferred partner - Homo sapiens (Human)                                 | LPP_HUMAN            |
| P50851               | Lipopolysaccharide-responsive and beige-like anchor protein - Homo sapiens (H   | LRBA_HUMAN           |
| Q13136               | Liprin-alpha-1 - Homo sapiens (Human)                                           | LIPA1_HUMAN          |
| Q86W92               | Liprin-beta-1 - Homo sapiens (Human)                                            | LIPB1_HUMAN          |
| Q8ND30               | Liprin-beta-2 - Homo sapiens (Human)                                            | LIPB2_HUMAN          |
| P07195               | L-lactate dehydrogenase B chain - Homo sapiens (Human)                          | LDHB_HUMAN           |
| Q96FF7               | LOC113230 protein - Homo sapiens (Human)                                        | Q96FF7_HUMAN         |
| Q7Z7L8               | LOC387763 protein - Homo sapiens (Human)                                        | Q7Z7L8_HUMAN         |
| P98164               | Low-density lipoprotein receptor-related protein 2 precursor - Homo sapiens (Hu | LRP2_HUMAN           |
| Q9BSL6               | LRRFIP1 protein - Homo sapiens (Human)                                          | Q9BSL6_HUMAN         |
| Q8ND56               | LSM14 protein homolog A - Homo sapiens (Human)                                  | LS14A_HUMAN          |
| P51884               | Lumican precursor - Homo sapiens (Human)                                        | LUM_HUMAN            |
| P05455               | Lupus La protein - Homo sapiens (Human)                                         | LA_HUMAN             |
| P50895               | Lutheran blood group glycoprotein precursor - Homo sapiens (Human)              | LU_HUMAN             |
| P33241               | Lymphocyte-specific protein 1 - Homo sapiens (Human)                            | LSP1_HUMAN           |
| O00754               | Lysosomal alpha-mannosidase precursor - Homo sapiens (Human)                    | MA2B1_HUMAN          |
| P61626               | Lysozyme C precursor - Homo sapiens (Human)                                     | LYSC_HUMAN           |
| P14174               | Macrophage migration inhibitory factor - Homo sapiens (Human)                   | MIF_HUMAN            |
| P40925               | Malate dehydrogenase, cytoplasmic - Homo sapiens (Human)                        | MDHC_HUMAN           |
| P40926               | Malate dehydrogenase, mitochondrial precursor - Homo sapiens (Human)            | MDHM_HUMAN           |
| Q16626               | Male-enhanced antigen 1 - Homo sapiens (Human)                                  | MEA1_HUMAN           |
| O43451               | Maltase-glucoamylase, intestinal [Includes: Maltase - Homo sapiens (Human)      | MGA_HUMAN            |
| O60664               | Mannose-6-phosphate receptor-binding protein 1 - Homo sapiens (Human)           | M6PBP_HUMAN          |

| <i>Accession No*</i> | <i>Protein Name*</i>                                                            | <i>Reference No*</i> |
|----------------------|---------------------------------------------------------------------------------|----------------------|
| P43243               | Matrin-3 - Homo sapiens (Human)                                                 | MATR3_HUMAN          |
| Q5JRA6               | Melanoma inhibitory activity protein 3 precursor - Homo sapiens (Human)         | MIA3_HUMAN           |
| Q9UNF1               | Melanoma-associated antigen D2 - Homo sapiens (Human)                           | MAGD2_HUMAN          |
| Q16853               | Membrane copper amine oxidase - Homo sapiens (Human)                            | AOC3_HUMAN           |
| O00264               | Membrane-associated progesterone receptor component 1 - Homo sapiens (Hu        | PGRC1_HUMAN          |
| O15173               | Membrane-associated progesterone receptor component 2 - Homo sapiens (Hu        | PGRC2_HUMAN          |
| Q14696               | Mesoderm development candidate 2 - Homo sapiens (Human)                         | MESD2_HUMAN          |
| Q9Y3D2               | Methionine-R-sulfoxide reductase B2 - Homo sapiens (Human)                      | MSRB2_HUMAN          |
| P51608               | Methyl-CpG-binding protein 2 - Homo sapiens (Human)                             | MECP2_HUMAN          |
| Q02252               | Methylmalonate-semialdehyde dehydrogenase [acylating], mitochondrial precur     | MMSA_HUMAN           |
| P22033               | Methylmalonyl-CoA mutase, mitochondrial precursor - Homo sapiens (Human)        | MUTA_HUMAN           |
| P54105               | Methylosome subunit pICln - Homo sapiens (Human)                                | ICLN_HUMAN           |
| Q8N3F8               | MICAL-like protein 1 - Homo sapiens (Human)                                     | MILK1_HUMAN          |
| P55081               | Microfibrillar-associated protein 1 - Homo sapiens (Human)                      | MFAP1_HUMAN          |
| P78559               | Microtubule-associated protein 1A - Homo sapiens (Human)                        | MAP1A_HUMAN          |
| Q59FT2               | Microtubule-associated protein 4 isoform 1 variant - Homo sapiens (Human)       | Q59FT2_HUMAN         |
| Q15691               | Microtubule-associated protein RP/EB family member 1 - Homo sapiens (Huma       | MARE1_HUMAN          |
| P10636               | Microtubule-associated protein tau - Homo sapiens (Human)                       | TAU_HUMAN            |
| O60307               | Microtubule-associated serine/threonine-protein kinase 3 - Homo sapiens (Hum    | MAST3_HUMAN          |
| O15021               | Microtubule-associated serine/threonine-protein kinase 4 - Homo sapiens (Hum    | MAST4_HUMAN          |
| Q8N183               | Mimitin, mitochondrial precursor - Homo sapiens (Human)                         | MIMIT_HUMAN          |
| P08235               | Mineralocorticoid receptor - Homo sapiens (Human)                               | MCR_HUMAN            |
| Q9Y2B0               | MIR-interacting saposin-like protein precursor - Homo sapiens (Human)           | MSAP_HUMAN           |
| P82909               | Mitochondrial 28S ribosomal protein S36 - Homo sapiens (Human)                  | RT36_HUMAN           |
| Q7Z434               | Mitochondrial antiviral-signaling protein - Homo sapiens (Human)                | MAVS_HUMAN           |
| P59942               | Mitochondrial coiled-coil domain protein 1, mitochondrial precursor - Homo sapi | MCCD1_HUMAN          |
| Q15390               | Mitochondrial fission regulator 1 - Homo sapiens (Human)                        | MTFR1_HUMAN          |
| P62072               | Mitochondrial import inner membrane translocase subunit Tim10 - Homo sapien     | TIM10_HUMAN          |
| O60220               | Mitochondrial import inner membrane translocase subunit Tim8 A - Homo sapie     | TIM8A_HUMAN          |
| Q9NS69               | Mitochondrial import receptor subunit TOM22 homolog - Homo sapiens (Human)      | TOM22_HUMAN          |
| Q16891               | Mitochondrial inner membrane protein - Homo sapiens (Human)                     | IMMT_HUMAN           |
| Q8N4Q1               | Mitochondrial intermembrane space import and assembly protein 40 - Homo sa      | MIA40_HUMAN          |
| Q9ULH7               | MKL/myocardin-like protein 2 - Homo sapiens (Human)                             | MKL2_HUMAN           |

| <i>Accession No*</i> | <i>Protein Name*</i>                                                         | <i>Reference No*</i> |
|----------------------|------------------------------------------------------------------------------|----------------------|
| P26038               | Moesin - Homo sapiens (Human)                                                | MOES_HUMAN           |
| Q7Z2S7               | MSTP116 - Homo sapiens (Human)                                               | Q7Z2S7_HUMAN         |
| Q96T58               | Msx2-interacting protein - Homo sapiens (Human)                              | MINT_HUMAN           |
| Q7Z6M4               | mTERF domain-containing protein 2 - Homo sapiens (Human)                     | MTER2_HUMAN          |
| Q9H3R2               | Mucin-13 precursor - Homo sapiens (Human)                                    | MUC13_HUMAN          |
| Q14894               | Mu-crystallin homolog - Homo sapiens (Human)                                 | CRYM_HUMAN           |
| Q9H8L6               | Multimerin-2 precursor - Homo sapiens (Human)                                | MMRN2_HUMAN          |
| Q12904               | Multisynthetase complex auxiliary component p43 [Contains: Endothelial monoc | MCA1_HUMAN           |
| Q9BQG0               | Myb-binding protein 1A - Homo sapiens (Human)                                | MBB1A_HUMAN          |
| O00499               | Myc box-dependent-interacting protein 1 - Homo sapiens (Human)               | BIN1_HUMAN           |
| P02686               | Myelin basic protein - Homo sapiens (Human)                                  | MBP_HUMAN            |
| Q9P2K5               | Myelin expression factor 2 - Homo sapiens (Human)                            | MYEF2_HUMAN          |
| Q15746               | Myosin light chain kinase, smooth muscle - Homo sapiens (Human)              | MYLK_HUMAN           |
| P08590               | Myosin light polypeptide 3 - Homo sapiens (Human)                            | MYL3_HUMAN           |
| P12829               | Myosin light polypeptide 4 - Homo sapiens (Human)                            | MYL4_HUMAN           |
| P14649               | Myosin light polypeptide 6B - Homo sapiens (Human)                           | MYL6B_HUMAN          |
| Q6WCQ1               | Myosin phosphatase Rho-interacting protein - Homo sapiens (Human)            | MRIP_HUMAN           |
| P35580               | Myosin-10 - Homo sapiens (Human)                                             | MYH10_HUMAN          |
| Q7Z406               | Myosin-14 - Homo sapiens (Human)                                             | MYH14_HUMAN          |
| P35579               | Myosin-9 - Homo sapiens (Human)                                              | MYH9_HUMAN           |
| Q9UM54               | Myosin-VI - Homo sapiens (Human)                                             | MYO6_HUMAN           |
| Q96JP2               | Myosin-XVB - Homo sapiens (Human)                                            | MO15B_HUMAN          |
| Q92614               | Myosin-XVIIIa - Homo sapiens (Human)                                         | MY18A_HUMAN          |
| P58546               | Myotrophin - Homo sapiens (Human)                                            | MTPN_HUMAN           |
| P29966               | Myristoylated alanine-rich C-kinase substrate - Homo sapiens (Human)         | MARCS_HUMAN          |
| O94760               | N(G),N(G)-dimethylarginine dimethylaminohydrolase 1 - Homo sapiens (Human)   | DDAH1_HUMAN          |
| P15586               | N-acetylglucosamine-6-sulfatase precursor - Homo sapiens (Human)             | GNS_HUMAN            |
| Q8WU60               | NADH dehydrogenase - Homo sapiens (Human)                                    | Q8WU60_HUMAN         |
| O43678               | NADH dehydrogenase [ubiquinone] 1 alpha subcomplex subunit 2 - Homo sapie    | NDUA2_HUMAN          |
| O00483               | NADH dehydrogenase [ubiquinone] 1 alpha subcomplex subunit 4 - Homo sapie    | NDUA4_HUMAN          |
| O95182               | NADH dehydrogenase [ubiquinone] 1 alpha subcomplex subunit 7 - Homo sapie    | NDUA7_HUMAN          |
| P51970               | NADH dehydrogenase [ubiquinone] 1 alpha subcomplex subunit 8 - Homo sapie    | NDUA8_HUMAN          |
| P19404               | NADH dehydrogenase [ubiquinone] flavoprotein 2, mitochondrial precursor - Ho | NDUV2_HUMAN          |

| <i>Accession No*</i> | <i>Protein Name*</i>                                                              | <i>Reference No*</i> |
|----------------------|-----------------------------------------------------------------------------------|----------------------|
| Q43181               | NADH dehydrogenase [ubiquinone] iron-sulfur protein 4, mitochondrial precursor    | NDUS4_HUMAN          |
| O75380               | NADH dehydrogenase [ubiquinone] iron-sulfur protein 6, mitochondrial precursor    | NDUS6_HUMAN          |
| Q6T4R5               | Nance-Horan syndrome protein - Homo sapiens (Human)                               | NHS_HUMAN            |
| Q13765               | Nascent polypeptide-associated complex subunit alpha - Homo sapiens (Human)       | NACA_HUMAN           |
| Q15843               | NEDD8 precursor - Homo sapiens (Human)                                            | NEDD8_HUMAN          |
| Q6UXI9               | Nephronectin precursor - Homo sapiens (Human)                                     | NPNT_HUMAN           |
| P08473               | Neprilysin - Homo sapiens (Human)                                                 | NEP_HUMAN            |
| Q8WXH0               | Nesprin-2 - Homo sapiens (Human)                                                  | SYNE2_HUMAN          |
| P48681               | Nestin - Homo sapiens (Human)                                                     | NEST_HUMAN           |
| Q9HB63               | Netrin-4 precursor - Homo sapiens (Human)                                         | NET4_HUMAN           |
| Q9UMX5               | Neudesin precursor - Homo sapiens (Human)                                         | NENF_HUMAN           |
| Q96SB3               | Neurabin-2 - Homo sapiens (Human)                                                 | NEB2_HUMAN           |
| P32004               | Neural cell adhesion molecule L1 precursor - Homo sapiens (Human)                 | L1CAM_HUMAN          |
| O00533               | Neural cell adhesion molecule L1-like protein precursor - Homo sapiens (Human)    | CHL1_HUMAN           |
| O00401               | Neural Wiskott-Aldrich syndrome protein - Homo sapiens (Human)                    | WASL_HUMAN           |
| Q09666               | Neuroblast differentiation-associated protein AHNAK - Homo sapiens (Human)        | AHNAK_HUMAN          |
| O94856               | Neurofascin precursor - Homo sapiens (Human)                                      | NFASC_HUMAN          |
| Q14697               | Neutral alpha-glucosidase AB precursor - Homo sapiens (Human)                     | GANAB_HUMAN          |
| Q07837               | Neutral and basic amino acid transport protein rBAT - Homo sapiens (Human)        | SLC31_HUMAN          |
| Q8NCF5               | NFATC2-interacting protein - Homo sapiens (Human)                                 | NF2IP_HUMAN          |
| Q5SYE7               | NHS-like protein 1. - Homo sapiens (Human)                                        | Q5SYE7_HUMAN         |
| P14543               | Nidogen-1 precursor - Homo sapiens (Human)                                        | NID1_HUMAN           |
| Q6KC79               | Nipped-B-like protein - Homo sapiens (Human)                                      | NIPBL_HUMAN          |
| P05114               | Nonhistone chromosomal protein HMG-14 - Homo sapiens (Human)                      | HMGN1_HUMAN          |
| P05204               | Nonhistone chromosomal protein HMG-17 - Homo sapiens (Human)                      | HMGN2_HUMAN          |
| Q15233               | Non-POU domain-containing octamer-binding protein - Homo sapiens (Human)          | NONO_HUMAN           |
| P22307               | Nonspecific lipid-transfer protein - Homo sapiens (Human)                         | NLTP_HUMAN           |
| Q5T992               | Novel protein - Homo sapiens (Human)                                              | Q5T992_HUMAN         |
| Q9UNZ2               | NSFL1 cofactor p47 - Homo sapiens (Human)                                         | NSF1C_HUMAN          |
| Q96KG9               | N-terminal kinase-like protein - Homo sapiens (Human)                             | NTKL_HUMAN           |
| P23497               | Nuclear autoantigen Sp-100 - Homo sapiens (Human)                                 | SP100_HUMAN          |
| Q7Z417               | Nuclear fragile X mental retardation-interacting protein 2 - Homo sapiens (Human) | NUFP2_HUMAN          |
| Q14980               | Nuclear mitotic apparatus protein 1 - Homo sapiens (Human)                        | NUMA1_HUMAN          |

| <i>Accession No*</i> | <i>Protein Name*</i>                                                         | <i>Reference No*</i> |
|----------------------|------------------------------------------------------------------------------|----------------------|
| P49790               | Nuclear pore complex protein Nup153 - Homo sapiens (Human)                   | NU153_HUMAN          |
| Q8N1F7               | Nuclear pore complex protein Nup93 - Homo sapiens (Human)                    | NUP93_HUMAN          |
| P52948               | Nuclear pore complex protein Nup98-Nup96 precursor [Contains: Nuclear pore   | NUP98_HUMAN          |
| P37198               | Nuclear pore glycoprotein p62 - Homo sapiens (Human)                         | NUP62_HUMAN          |
| P82979               | Nuclear protein Hcc-1 - Homo sapiens (Human)                                 | HCC1_HUMAN           |
| P23511               | Nuclear transcription factor Y subunit alpha - Homo sapiens (Human)          | NFYA_HUMAN           |
| Q9H1E3               | Nuclear ubiquitous casein and cyclin-dependent kinases substrate - Homo sapi | NUCKS_HUMAN          |
| Q02818               | Nucleobindin-1 precursor - Homo sapiens (Human)                              | NUCB1_HUMAN          |
| P80303               | Nucleobindin-2 precursor - Homo sapiens (Human)                              | NUCB2_HUMAN          |
| Q14978               | Nucleolar phosphoprotein p130 - Homo sapiens (Human)                         | NOLC1_HUMAN          |
| O60936               | Nucleolar protein 3 - Homo sapiens (Human)                                   | NOL3_HUMAN           |
| Q9Y2X3               | Nucleolar protein 5 - Homo sapiens (Human)                                   | NOL5_HUMAN           |
| Q9NR30               | Nucleolar RNA helicase 2 - Homo sapiens (Human)                              | DDX21_HUMAN          |
| P06748               | Nucleophosmin - Homo sapiens (Human)                                         | NPM_HUMAN            |
| P52594               | Nucleoporin-like protein RIP - Homo sapiens (Human)                          | NUPL_HUMAN           |
| Q99733               | Nucleosome assembly protein 1-like 4 - Homo sapiens (Human)                  | NP1L4_HUMAN          |
| Q96NT1               | Nucleosome assembly protein 1-like 5 - Homo sapiens (Human)                  | Q96NT1_HUMAN         |
| Q9NX40               | OCIA domain-containing protein 1 - Homo sapiens (Human)                      | Q9NX40_HUMAN         |
| Q56VL3               | OCIA domain-containing protein 2 - Homo sapiens (Human)                      | Q56VL3_HUMAN         |
| Q96CV9               | Optineurin - Homo sapiens (Human)                                            | OPTN_HUMAN           |
| Q9Y226               | Organic-cation transporter-like 3 - Homo sapiens (Human)                     | ORCT3_HUMAN          |
| Q92882               | Osteoclast-stimulating factor 1 - Homo sapiens (Human)                       | OSTF1_HUMAN          |
| P10451               | Osteopontin precursor - Homo sapiens (Human)                                 | OSTP_HUMAN           |
| Q01804               | OTU domain-containing protein 4 - Homo sapiens (Human)                       | OTUD4_HUMAN          |
| Q8N573               | Oxidation resistance protein 1 - Homo sapiens (Human)                        | OXR1_HUMAN           |
| Q12771               | P37 AUF1 - Homo sapiens (Human)                                              | Q12771_HUMAN         |
| Q96ST3               | Paired amphipathic helix protein Sin3a - Homo sapiens (Human)                | SIN3A_HUMAN          |
| Q9NP74               | Palmdelphin - Homo sapiens (Human)                                           | PALMD_HUMAN          |
| O75781               | Paralemmin - Homo sapiens (Human)                                            | PALM_HUMAN           |
| P20472               | Parvalbumin alpha - Homo sapiens (Human)                                     | PRVA_HUMAN           |
| O00151               | PDZ and LIM domain protein 1 - Homo sapiens (Human)                          | PDLI1_HUMAN          |
| Q96JY6               | PDZ and LIM domain protein 2 - Homo sapiens (Human)                          | PDLI2_HUMAN          |
| Q96HC4               | PDZ and LIM domain protein 5 - Homo sapiens (Human)                          | PDLI5_HUMAN          |

| <i>Accession No*</i> | <i>Protein Name*</i>                                                          | <i>Reference No*</i> |
|----------------------|-------------------------------------------------------------------------------|----------------------|
| Q9NR12               | PDZ and LIM domain protein 7 - Homo sapiens (Human)                           | PDLI7_HUMAN          |
| Q5T2W1               | PDZ domain-containing protein 1 - Homo sapiens (Human)                        | PDZD1_HUMAN          |
| Q5EBL8               | PDZ domain-containing protein 11 - Homo sapiens (Human)                       | PDZ11_HUMAN          |
| O15018               | PDZ domain-containing protein 2 - Homo sapiens (Human)                        | PDZD2_HUMAN          |
| Q8NEN9               | PDZ domain-containing protein 8 - Homo sapiens (Human)                        | PDZD8_HUMAN          |
| O14908               | PDZ domain-containing protein GIPC1 - Homo sapiens (Human)                    | GIPC1_HUMAN          |
| Q8TF65               | PDZ domain-containing protein GIPC2 - Homo sapiens (Human)                    | GIPC2_HUMAN          |
| Q13113               | PDZK1-interacting protein 1 - Homo sapiens (Human)                            | PDZ11_HUMAN          |
| Q96IV0               | Peptide-N(4)-(N-acetyl-beta-glucosaminy)asparagine amidase - Homo sapiens     | NGLY1_HUMAN          |
| Q6IBH5               | Peptidyl-prolyl cis-trans isomerase - Homo sapiens (Human)                    | Q6IBH5_HUMAN         |
| P62937               | Peptidyl-prolyl cis-trans isomerase A - Homo sapiens (Human)                  | PPIA_HUMAN           |
| Q13526               | Peptidyl-prolyl cis-trans isomerase NIMA-interacting 1 - Homo sapiens (Human) | PIN1_HUMAN           |
| Q13356               | Peptidyl-prolyl cis-trans isomerase-like 2 - Homo sapiens (Human)             | PPIL2_HUMAN          |
| Q15154               | Pericentriolar material 1 protein - Homo sapiens (Human)                      | PCM1_HUMAN           |
| Q8NEY8               | Periphilin-1 - Homo sapiens (Human)                                           | PPHLN_HUMAN          |
| O60437               | Periplakin - Homo sapiens (Human)                                             | PEPL_HUMAN           |
| Q06830               | Peroxiredoxin-1 - Homo sapiens (Human)                                        | PRDX1_HUMAN          |
| P32119               | Peroxiredoxin-2 - Homo sapiens (Human)                                        | PRDX2_HUMAN          |
| Q13162               | Peroxiredoxin-4 - Homo sapiens (Human)                                        | PRDX4_HUMAN          |
| P30044               | Peroxiredoxin-5, mitochondrial precursor - Homo sapiens (Human)               | PRDX5_HUMAN          |
| Q08426               | Peroxisomal bifunctional enzyme - Homo sapiens (Human)                        | ECHP_HUMAN           |
| O75381               | Peroxisomal membrane protein PEX14 - Homo sapiens (Human)                     | PEX14_HUMAN          |
| Q6Y7W6               | PERQ amino acid-rich with GYF domain-containing protein 2 - Homo sapiens (    | PERQ2_HUMAN          |
| Q8WW12               | PEST proteolytic signal-containing nuclear protein - Homo sapiens (Human)     | PCNP_HUMAN           |
| Q92576               | PHD finger protein 3 - Homo sapiens (Human)                                   | PHF3_HUMAN           |
| Q8IZ21               | Phosphatase and actin regulator 4 - Homo sapiens (Human)                      | PHAR4_HUMAN          |
| P30086               | Phosphatidylethanolamine-binding protein 1 - Homo sapiens (Human)             | PEBP1_HUMAN          |
| O00443               | Phosphatidylinositol-4-phosphate 3-kinase C2 domain-containing alpha polypep  | P3C2A_HUMAN          |
| P35558               | Phosphoenolpyruvate carboxykinase, cytosolic [GTP] - Homo sapiens (Human)     | PPCKC_HUMAN          |
| Q6VY07               | Phosphofurin acidic cluster sorting protein 1 - Homo sapiens (Human)          | PACS1_HUMAN          |
| P00558               | Phosphoglycerate kinase 1 - Homo sapiens (Human)                              | PGK1_HUMAN           |
| Q9H307               | Pinin - Homo sapiens (Human)                                                  | PININ_HUMAN          |
| Q99569               | Plakophilin-4 - Homo sapiens (Human)                                          | PKP4_HUMAN           |



| <i>Accession No*</i> | <i>Protein Name*</i>                                                         | <i>Reference No*</i> |
|----------------------|------------------------------------------------------------------------------|----------------------|
| P20020               | Plasma membrane calcium-transporting ATPase 1 - Homo sapiens (Human)         | AT2B1_HUMAN          |
| P23634               | Plasma membrane calcium-transporting ATPase 4 - Homo sapiens (Human)         | AT2B4_HUMAN          |
| P05154               | Plasma serine protease inhibitor precursor - Homo sapiens (Human)            | IPSP_HUMAN           |
| Q8NC51               | Plasminogen activator inhibitor 1 RNA-binding protein - Homo sapiens (Human) | PAIRB_HUMAN          |
| P16284               | Platelet endothelial cell adhesion molecule precursor - Homo sapiens (Human) | PECA1_HUMAN          |
| Q9HAU0               | Pleckstrin homology domain-containing family A member 5 - Homo sapiens (Hu   | PKHA5_HUMAN          |
| Q6IQ23               | Pleckstrin homology domain-containing family A member 7 - Homo sapiens (Hu   | PKHA7_HUMAN          |
| Q86UU1               | Pleckstrin homology-like domain family B member 1 - Homo sapiens (Human)     | PHLB1_HUMAN          |
| Q86SQ0               | Pleckstrin homology-like domain family B member 2 - Homo sapiens (Human)     | PHLB2_HUMAN          |
| A1L390               | PLEKHG3 protein - Homo sapiens (Human)                                       | A1L390_HUMAN         |
| Q9NP85               | Podocin - Homo sapiens (Human)                                               | PODO_HUMAN           |
| P15151               | Poliovirus receptor precursor - Homo sapiens (Human)                         | PVR_HUMAN            |
| Q15223               | Poliovirus receptor-related protein 1 precursor - Homo sapiens (Human)       | PVRL1_HUMAN          |
| P09874               | Poly [ADP-ribose] polymerase 1 - Homo sapiens (Human)                        | PARP1_HUMAN          |
| Q15365               | Poly(rC)-binding protein 1 - Homo sapiens (Human)                            | PCBP1_HUMAN          |
| P11940               | Polyadenylate-binding protein 1 - Homo sapiens (Human)                       | PABP1_HUMAN          |
| Q86U42               | Polyadenylate-binding protein 2 - Homo sapiens (Human)                       | PABP2_HUMAN          |
| O60828               | Polyglutamine-binding protein 1 - Homo sapiens (Human)                       | PQBP1_HUMAN          |
| Q9BY77               | Polymerase delta-interacting protein 3 - Homo sapiens (Human)                | PDIP3_HUMAN          |
| Q6NZI2               | Polymerase I and transcript release factor - Homo sapiens (Human)            | PTRF_HUMAN           |
| P01833               | Polymeric-immunoglobulin receptor precursor - Homo sapiens (Human)           | PIGR_HUMAN           |
| Q9BWK2               | Potassium channel modulatory factor 1 - Homo sapiens (Human)                 | Q9BWK2_HUMAN         |
| O95279               | Potassium channel subfamily K member 5 - Homo sapiens (Human)                | KCNK5_HUMAN          |
| O60925               | Prefoldin subunit 1 - Homo sapiens (Human)                                   | PFD1_HUMAN           |
| Q9UHV9               | Prefoldin subunit 2 - Homo sapiens (Human)                                   | PFD2_HUMAN           |
| P61758               | Prefoldin subunit 3 - Homo sapiens (Human)                                   | PFD3_HUMAN           |
| Q9NQP4               | Prefoldin subunit 4 - Homo sapiens (Human)                                   | PFD4_HUMAN           |
| Q6UN15               | Pre-mRNA 3'-end-processing factor FIP1 - Homo sapiens (Human)                | FIP1_HUMAN           |
| Q92620               | Pre-mRNA-splicing factor ATP-dependent RNA helicase PRP16 - Homo sapien      | PRP16_HUMAN          |
| Q9ULR0               | Pre-mRNA-splicing factor ISY1 homolog - Homo sapiens (Human)                 | ISY1_HUMAN           |
| Q9UHG3               | Prenylcysteine oxidase 1 precursor - Homo sapiens (Human)                    | PCYOX_HUMAN          |
| Q969E8               | Pre-rRNA-processing protein TSR2 homolog - Homo sapiens (Human)              | TSR2_HUMAN           |
| Q96IZ0               | PRKC apoptosis WT1 regulator protein - Homo sapiens (Human)                  | PAWR_HUMAN           |

| <i>Accession No*</i> | <i>Protein Name*</i>                                                          | <i>Reference No*</i> |
|----------------------|-------------------------------------------------------------------------------|----------------------|
| Q13206               | Probable ATP-dependent RNA helicase DDX10 - Homo sapiens (Human)              | DDX10_HUMAN          |
| Q7L014               | Probable ATP-dependent RNA helicase DDX46 - Homo sapiens (Human)              | DDX46_HUMAN          |
| P26196               | Probable ATP-dependent RNA helicase DDX6 - Homo sapiens (Human)               | DDX6_HUMAN           |
| Q9H7Z6               | Probable histone acetyltransferase MYST1 - Homo sapiens (Human)               | MYST1_HUMAN          |
| Q9C0B5               | Probable palmitoyltransferase ZDHHC5 - Homo sapiens (Human)                   | ZDHHC5_HUMAN         |
| P49756               | Probable RNA-binding protein 25 - Homo sapiens (Human)                        | RBM25_HUMAN          |
| P07737               | Profilin-1 - Homo sapiens (Human)                                             | PROF1_HUMAN          |
| O14737               | Programmed cell death protein 5 - Homo sapiens (Human)                        | PDCD5_HUMAN          |
| O94903               | Proline synthetase co-transcribed bacterial homolog protein - Homo sapiens (H | PROSC_HUMAN          |
| Q96B36               | Proline-rich AKT1 substrate 1 - Homo sapiens (Human)                          | AKTS1_HUMAN          |
| Q92733               | Proline-rich protein PRCC - Homo sapiens (Human)                              | PRCC_HUMAN           |
| Q06323               | Proteasome activator complex subunit 1 - Homo sapiens (Human)                 | PSME1_HUMAN          |
| P28072               | Proteasome subunit beta type 6 precursor - Homo sapiens (Human)               | PSB6_HUMAN           |
| Q16186               | Protein ADRM1 - Homo sapiens (Human)                                          | ADRM1_HUMAN          |
| Q9HCF4               | Protein ALO17 - Homo sapiens (Human)                                          | ALO17_HUMAN          |
| P55145               | Protein ARMET precursor - Homo sapiens (Human)                                | ARMET_HUMAN          |
| Q8N129               | PRotein Associated with Tlr4 - Homo sapiens (Human)                           | Q8N129_HUMAN         |
| Q9H694               | Protein bicaudal C homolog 1 - Homo sapiens (Human)                           | BICC1_HUMAN          |
| Q99622               | Protein C10 - Homo sapiens (Human)                                            | C10_HUMAN            |
| Q96RK0               | Protein capicua homolog - Homo sapiens (Human)                                | CIC_HUMAN            |
| O15234               | Protein CASC3 - Homo sapiens (Human)                                          | CASC3_HUMAN          |
| Q9UKY7               | Protein CDV3 homolog - Homo sapiens (Human)                                   | Q9UKY7_HUMAN         |
| O75128               | Protein cordon-bleu - Homo sapiens (Human)                                    | COBL_HUMAN           |
| O60888               | Protein CutA precursor - Homo sapiens (Human)                                 | CUTA_HUMAN           |
| Q9P013               | Protein CWC15 homolog - Homo sapiens (Human)                                  | CWC15_HUMAN          |
| Q9P219               | Protein Daple - Homo sapiens (Human)                                          | DAPLE_HUMAN          |
| P35659               | Protein DEK - Homo sapiens (Human)                                            | DEK_HUMAN            |
| Q96DF8               | Protein DGCR14 - Homo sapiens (Human)                                         | DGC14_HUMAN          |
| P30101               | Protein disulfide-isomerase A3 precursor - Homo sapiens (Human)               | PDIA3_HUMAN          |
| P13667               | Protein disulfide-isomerase A4 precursor - Homo sapiens (Human)               | PDIA4_HUMAN          |
| Q15084               | Protein disulfide-isomerase A6 precursor - Homo sapiens (Human)               | PDIA6_HUMAN          |
| P07237               | Protein disulfide-isomerase precursor - Homo sapiens (Human)                  | PDIA1_HUMAN          |
| Q99497               | Protein DJ-1 - Homo sapiens (Human)                                           | PARK7_HUMAN          |

| <i>Accession No*</i> | <i>Protein Name*</i>                                                           | <i>Reference No*</i> |
|----------------------|--------------------------------------------------------------------------------|----------------------|
| Q9NX18               | Protein EMI5 homolog, mitochondrial precursor - Homo sapiens (Human)           | EMI5_HUMAN           |
| Q9BTL3               | Protein FAM103A1 - Homo sapiens (Human)                                        | F103A_HUMAN          |
| Q9NRY5               | Protein FAM114A2 - Homo sapiens (Human)                                        | F1142_HUMAN          |
| Q8NC44               | Protein FAM134A - Homo sapiens (Human)                                         | F134A_HUMAN          |
| Q96C01               | Protein FAM136A - Homo sapiens (Human)                                         | F136A_HUMAN          |
| Q9Y4E1               | Protein FAM21C - Homo sapiens (Human)                                          | FA21C_HUMAN          |
| Q8NFC6               | Protein FAM44A - Homo sapiens (Human)                                          | FA44A_HUMAN          |
| Q9Y4F5               | Protein KIAA0284 - Homo sapiens (Human)                                        | K0284_HUMAN          |
| Q6IA24               | Protein KIAA1191 - Homo sapiens (Human)                                        | Q6IA24_HUMAN         |
| Q9P206               | Protein KIAA1522 - Homo sapiens (Human)                                        | Q9P206_HUMAN         |
| Q9UNF0               | Protein kinase C and casein kinase substrate in neurons protein 2 - Homo sapie | PACN2_HUMAN          |
| Q96RT1               | Protein LAP2 - Homo sapiens (Human)                                            | LAP2_HUMAN           |
| Q14160               | Protein LAP4 - Homo sapiens (Human)                                            | LAP4_HUMAN           |
| Q86UE4               | Protein LYRIC - Homo sapiens (Human)                                           | LYRIC_HUMAN          |
| Q8WZA0               | Protein LZIC - Homo sapiens (Human)                                            | LZIC_HUMAN           |
| P49757               | Protein numb homolog - Homo sapiens (Human)                                    | NUMB_HUMAN           |
| O14974               | Protein phosphatase 1 regulatory subunit 12A - Homo sapiens (Human)            | MYPT1_HUMAN          |
| O60237               | Protein phosphatase 1 regulatory subunit 12B - Homo sapiens (Human)            | MYPT2_HUMAN          |
| Q9BZL4               | Protein phosphatase 1 regulatory subunit 12C - Homo sapiens (Human)            | Q9BZL4_HUMAN         |
| Q96A00               | Protein phosphatase 1 regulatory subunit 14A - Homo sapiens (Human)            | PP14A_HUMAN          |
| Q15435               | Protein phosphatase 1 regulatory subunit 7 - Homo sapiens (Human)              | PP1R7_HUMAN          |
| O15355               | Protein phosphatase 1G - Homo sapiens (Human)                                  | PPM1G_HUMAN          |
| Q8IV56               | Protein PRR15 - Homo sapiens (Human)                                           | PRR15_HUMAN          |
| Q13123               | Protein Red - Homo sapiens (Human)                                             | RED_HUMAN            |
| P31949               | Protein S100-A11 - Homo sapiens (Human)                                        | S10AB_HUMAN          |
| Q99584               | Protein S100-A13 - Homo sapiens (Human)                                        | S10AD_HUMAN          |
| P06703               | Protein S100-A6 - Homo sapiens (Human)                                         | S10A6_HUMAN          |
| P31151               | Protein S100-A7 - Homo sapiens (Human)                                         | S10A7_HUMAN          |
| P06702               | Protein S100-A9 - Homo sapiens (Human)                                         | S10A9_HUMAN          |
| Q13796               | Protein Shroom2 - Homo sapiens (Human)                                         | SHRM2_HUMAN          |
| Q9ULL8               | Protein Shroom4 - Homo sapiens (Human)                                         | SHRM4_HUMAN          |
| Q6PL24               | Protein TMED8 - Homo sapiens (Human)                                           | TMED8_HUMAN          |
| O94979               | Protein transport protein Sec31A - Homo sapiens (Human)                        | SC31A_HUMAN          |

| <i>Accession No*</i> | <i>Protein Name*</i>                                                             | <i>Reference No*</i> |
|----------------------|----------------------------------------------------------------------------------|----------------------|
| Q9Y5U2               | Protein TSSC4 - Homo sapiens (Human)                                             | TSSC4_HUMAN          |
| Q9BRP8               | Protein wibg homolog - Homo sapiens (Human)                                      | WIBG_HUMAN           |
| P00734               | Prothrombin precursor - Homo sapiens (Human)                                     | THRB_HUMAN           |
| Q9BYE9               | Protocadherin LKC precursor - Homo sapiens (Human)                               | PCDLK_HUMAN          |
| P46108               | Proto-oncogene C-crk - Homo sapiens (Human)                                      | CRK_HUMAN            |
| P61457               | Pterin-4-alpha-carbinolamine dehydratase - Homo sapiens (Human)                  | PHS_HUMAN            |
| Q8TB72               | Pumilio homolog 2 - Homo sapiens (Human)                                         | PUM2_HUMAN           |
| O43865               | Putative adenosylhomocysteinase 2 - Homo sapiens (Human)                         | SAHH2_HUMAN          |
| Q96HN2               | Putative adenosylhomocysteinase 3 - Homo sapiens (Human)                         | SAHH3_HUMAN          |
| Q7Z478               | Putative ATP-dependent RNA helicase DHX29 - Homo sapiens (Human)                 | DHX29_HUMAN          |
| O75153               | Putative eukaryotic translation initiation factor 3 subunit - Homo sapiens (Huma | IF3X_HUMAN           |
| Q7Z422               | Putative MAPK activating protein - Homo sapiens (Human)                          | Q7Z422_HUMAN         |
| O43143               | Putative pre-mRNA-splicing factor ATP-dependent RNA helicase DHX15 - Hom         | DHX15_HUMAN          |
| Q96T37               | Putative RNA-binding protein 15 - Homo sapiens (Human)                           | RBM15_HUMAN          |
| P98179               | Putative RNA-binding protein 3 - Homo sapiens (Human)                            | RBM3_HUMAN           |
| Q8IY81               | Putative rRNA methyltransferase 3 - Homo sapiens (Human)                         | RRMJ3_HUMAN          |
| Q8IX01               | Putative splicing factor, arginine/serine-rich 14 - Homo sapiens (Human)         | SFR14_HUMAN          |
| Q8NFU3               | Putative thiosulfate sulfurtransferase KAT - Homo sapiens (Human)                | KAT_HUMAN            |
| Q9Y520               | Putative uncharacterized protein - Homo sapiens (Human)                          | Q9Y520_HUMAN         |
| Q05DE8               | Putative uncharacterized protein - Homo sapiens (Human)                          | Q05DE8_HUMAN         |
| A5PL36               | Putative uncharacterized protein - Homo sapiens (Human)                          | A5PL36_HUMAN         |
| Q05DR4               | Putative uncharacterized protein - Homo sapiens (Human)                          | Q05DR4_HUMAN         |
| Q9NSM8               | Putative uncharacterized protein DKFZp434M1616 - Homo sapiens (Human)            | Q9NSM8_HUMAN         |
| Q5JXL8               | Putative uncharacterized protein DKFZp564G0422 - Homo sapiens (Human)            | Q5JXL8_HUMAN         |
| Q5HYK7               | Putative uncharacterized protein DKFZp686I04144 - Homo sapiens (Human)           | Q5HYK7_HUMAN         |
| Q53QV2               | Putative uncharacterized protein LBH - Homo sapiens (Human)                      | Q53QV2_HUMAN         |
| Q8WU39               | Putative uncharacterized protein MGC29506 - Homo sapiens (Human)                 | Q8WU39_HUMAN         |
| Q7Z7A4               | PX domain-containing protein kinase-like protein - Homo sapiens (Human)          | PXK_HUMAN            |
| Q6P996               | Pyridoxal-dependent decarboxylase domain-containing protein 1 - Homo sapien      | PDXD1_HUMAN          |
| Q9NVS9               | Pyridoxine-5'-phosphate oxidase - Homo sapiens (Human)                           | PNPO_HUMAN           |
| Q15276               | Rab GTPase-binding effector protein 1 - Homo sapiens (Human)                     | RABE1_HUMAN          |
| Q9H5N1               | Rab GTPase-binding effector protein 2 - Homo sapiens (Human)                     | RABE2_HUMAN          |
| Q6WKZ4               | Rab11 family-interacting protein 1 - Homo sapiens (Human)                        | RFIP1_HUMAN          |

| <i>Accession No*</i> | <i>Protein Name*</i>                                                         | <i>Reference No*</i> |
|----------------------|------------------------------------------------------------------------------|----------------------|
| Q75154               | Rab11 family-interacting protein 3 - Homo sapiens (Human)                    | RFIP3_HUMAN          |
| Q9BXF6               | Rab11 family-interacting protein 5 - Homo sapiens (Human)                    | RFIP5_HUMAN          |
| Q96QF0               | RAB3A-interacting protein - Homo sapiens (Human)                             | RAB3I_HUMAN          |
| Q9H1K0               | Rabenosyn-5 - Homo sapiens (Human)                                           | RBNS5_HUMAN          |
| Q96NA2               | Rab-interacting lysosomal protein - Homo sapiens (Human)                     | RILP_HUMAN           |
| P35241               | Radixin - Homo sapiens (Human)                                               | RADI_HUMAN           |
| Q9H6Z4               | Ran-binding protein 3 - Homo sapiens (Human)                                 | RANB3_HUMAN          |
| P43487               | Ran-specific GTPase-activating protein - Homo sapiens (Human)                | RANG_HUMAN           |
| Q8NHQ8               | Ras association domain-containing protein 8 - Homo sapiens (Human)           | RASF8_HUMAN          |
| Q13283               | Ras GTPase-activating protein-binding protein 1 - Homo sapiens (Human)       | G3BP1_HUMAN          |
| Q9UN86               | Ras GTPase-activating protein-binding protein 2 - Homo sapiens (Human)       | G3BP2_HUMAN          |
| Q70E73               | Ras-associated and pleckstrin homology domains-containing protein 1 - Homo s | RAPH1_HUMAN          |
| P62820               | Ras-related protein Rab-1A - Homo sapiens (Human)                            | RAB1A_HUMAN          |
| Q92766               | RAS-responsive element-binding protein 1 - Homo sapiens (Human)              | RREB1_HUMAN          |
| P04626               | Receptor tyrosine-protein kinase erbB-2 precursor - Homo sapiens (Human)     | ERBB2_HUMAN          |
| Q12913               | Receptor-type tyrosine-protein phosphatase eta precursor - Homo sapiens (Hu  | PTPRJ_HUMAN          |
| P28827               | Receptor-type tyrosine-protein phosphatase mu precursor - Homo sapiens (Hu   | PTPRM_HUMAN          |
| Q9H1J1               | Regulator of nonsense transcripts 3A - Homo sapiens (Human)                  | REN3A_HUMAN          |
| Q9BZ17               | Regulator of nonsense transcripts 3B - Homo sapiens (Human)                  | REN3B_HUMAN          |
| Q96T23               | Remodeling and spacing factor 1 - Homo sapiens (Human)                       | RSF1_HUMAN           |
| P35251               | Replication factor C subunit 1 - Homo sapiens (Human)                        | RFC1_HUMAN           |
| Q9H4X1               | Response gene to complement 32 protein - Homo sapiens (Human)                | RGC32_HUMAN          |
| Q15293               | Reticulocalbin-1 precursor - Homo sapiens (Human)                            | RCN1_HUMAN           |
| Q96D15               | Reticulocalbin-3 precursor - Homo sapiens (Human)                            | RCN3_HUMAN           |
| Q16799               | Reticulon-1 - Homo sapiens (Human)                                           | RTN1_HUMAN           |
| P52565               | Rho GDP-dissociation inhibitor 1 - Homo sapiens (Human)                      | GDIR_HUMAN           |
| P52566               | Rho GDP-dissociation inhibitor 2 - Homo sapiens (Human)                      | GDIS_HUMAN           |
| Q68EM7               | Rho GTPase-activating protein 17 - Homo sapiens (Human)                      | RHG17_HUMAN          |
| Q8N392               | Rho GTPase-activating protein 18 - Homo sapiens (Human)                      | RHG18_HUMAN          |
| Q5T5U3               | Rho GTPase-activating protein 21 - Homo sapiens (Human)                      | Q5T5U3_HUMAN         |
| Q8N264               | Rho GTPase-activating protein 24 - Homo sapiens (Human)                      | RHG24_HUMAN          |
| P42331               | Rho GTPase-activating protein 25 - Homo sapiens (Human)                      | RHG25_HUMAN          |
| Q5T2V0               | Rho guanine nucleotide exchange factor - Homo sapiens (Human)                | Q5T2V0_HUMAN         |

| <i>Accession No*</i> | <i>Protein Name*</i>                                                           | <i>Reference No*</i> |
|----------------------|--------------------------------------------------------------------------------|----------------------|
| Q9NZN5               | Rho guanine nucleotide exchange factor 12 - Homo sapiens (Human)               | ARHGC_HUMAN          |
| Q5VV41               | Rho guanine nucleotide exchange factor 16 - Homo sapiens (Human)               | ARHGG_HUMAN          |
| Q96PE2               | Rho guanine nucleotide exchange factor 17 - Homo sapiens (Human)               | ARHGH_HUMAN          |
| P52758               | Ribonuclease UK114 - Homo sapiens (Human)                                      | UK114_HUMAN          |
| Q96E11               | Ribosome recycling factor, mitochondrial precursor - Homo sapiens (Human)      | RRFM_HUMAN           |
| Q9P2E9               | Ribosome-binding protein 1 - Homo sapiens (Human)                              | RRBP1_HUMAN          |
| O15541               | RING finger protein 113A - Homo sapiens (Human)                                | R113A_HUMAN          |
| Q8ND24               | RING finger protein 214 - Homo sapiens (Human)                                 | RN214_HUMAN          |
| Q9H1B7               | RING finger protein C14orf4 - Homo sapiens (Human)                             | CN004_HUMAN          |
| Q53GL6               | RNA binding protein - Homo sapiens (Human)                                     | Q53GL6_HUMAN         |
| Q8WVC0               | RNA polymerase-associated protein LEO1 - Homo sapiens (Human)                  | LEO1_HUMAN           |
| Q92541               | RNA polymerase-associated protein RTF1 homolog - Homo sapiens (Human)          | RTF1_HUMAN           |
| Q9Y5S9               | RNA-binding protein 8A - Homo sapiens (Human)                                  | RBM8A_HUMAN          |
| Q93062               | RNA-binding protein with multiple splicing - Homo sapiens (Human)              | RBPMS_HUMAN          |
| Q9Y3B9               | RRP15-like protein - Homo sapiens (Human)                                      | RRP15_HUMAN          |
| Q96T51               | RUN and FYVE domain-containing protein 1 - Homo sapiens (Human)                | RUFY1_HUMAN          |
| Q9HA26               | RUN domain-containing protein 2A - Homo sapiens (Human)                        | RUN2A_HUMAN          |
| Q9H446               | RWD domain-containing protein 1 - Homo sapiens (Human)                         | RWDD1_HUMAN          |
| Q9UHR5               | SAP30-binding protein - Homo sapiens (Human)                                   | S30BP_HUMAN          |
| Q04323               | SAPK substrate protein 1 - Homo sapiens (Human)                                | SAKS1_HUMAN          |
| Q5H9R7               | SAPS domain family member 3 - Homo sapiens (Human)                             | SAPS3_HUMAN          |
| P23327               | Sarcoplasmic reticulum histidine-rich calcium-binding protein precursor - Homo | SRCH_HUMAN           |
| Q14151               | Scaffold attachment factor B2 - Homo sapiens (Human)                           | SAFB2_HUMAN          |
| O15027               | SEC16 homolog A - Homo sapiens (Human)                                         | SC16A_HUMAN          |
| Q13228               | Selenium-binding protein 1 - Homo sapiens (Human)                              | SBP1_HUMAN           |
| P49908               | Selenoprotein P precursor - Homo sapiens (Human)                               | SEPP1_HUMAN          |
| Q92854               | Semaphorin-4D precursor - Homo sapiens (Human)                                 | SEM4D_HUMAN          |
| Q15019               | Septin-2 - Homo sapiens (Human)                                                | SEPT2_HUMAN          |
| Q9UHD8               | Septin-9 - Homo sapiens (Human)                                                | SEPT9_HUMAN          |
| Q13501               | Sequestosome-1 - Homo sapiens (Human)                                          | SQSTM_HUMAN          |
| Q7Z5V7               | Serine arginine-rich pre-mRNA splicing factor SR-A1 - Homo sapiens (Human)     | Q7Z5V7_HUMAN         |
| P34896               | Serine hydroxymethyltransferase, cytosolic - Homo sapiens (Human)              | GLYC_HUMAN           |
| Q9UQ35               | Serine/arginine repetitive matrix protein 2 - Homo sapiens (Human)             | SRRM2_HUMAN          |

| <i>Accession No*</i> | <i>Protein Name*</i>                                                            | <i>Reference No*</i> |
|----------------------|---------------------------------------------------------------------------------|----------------------|
| Q13188               | Serine/threonine-protein kinase 3 - Homo sapiens (Human)                        | STK3_HUMAN           |
| Q8IWU2               | Serine/threonine-protein kinase LMTK2 precursor - Homo sapiens (Human)          | LMTK2_HUMAN          |
| Q7KZI7               | Serine/threonine-protein kinase MARK2 - Homo sapiens (Human)                    | MARK2_HUMAN          |
| Q9Y5S2               | Serine/threonine-protein kinase MRCK beta - Homo sapiens (Human)                | MRCKB_HUMAN          |
| Q16513               | Serine/threonine-protein kinase N2 - Homo sapiens (Human)                       | PKN2_HUMAN           |
| Q8TD19               | Serine/threonine-protein kinase Nek9 - Homo sapiens (Human)                     | NEK9_HUMAN           |
| O95747               | Serine/threonine-protein kinase OSR1 - Homo sapiens (Human)                     | OXSRI_HUMAN          |
| Q13153               | Serine/threonine-protein kinase PAK 1 - Homo sapiens (Human)                    | PAK1_HUMAN           |
| O96013               | Serine/threonine-protein kinase PAK 4 - Homo sapiens (Human)                    | PAK4_HUMAN           |
| Q13523               | Serine/threonine-protein kinase PRP4 homolog - Homo sapiens (Human)             | PRP4B_HUMAN          |
| Q9H4A3               | Serine/threonine-protein kinase WNK1 - Homo sapiens (Human)                     | WNK1_HUMAN           |
| Q96QC0               | Serine/threonine-protein phosphatase 1 regulatory subunit 10 - Homo sapiens (   | PP1RA_HUMAN          |
| Q08209               | Serine/threonine-protein phosphatase 2B catalytic subunit alpha isoform - Hom   | PP2BA_HUMAN          |
| Q8TCE1               | SERPINC1 protein - Homo sapiens (Human)                                         | Q8TCE1_HUMAN         |
| O95810               | Serum deprivation-response protein - Homo sapiens (Human)                       | SDPR_HUMAN           |
| Q86TU7               | SET domain-containing protein 3 - Homo sapiens (Human)                          | SETD3_HUMAN          |
| Q9UPX8               | SH3 and multiple ankyrin repeat domains protein 2 - Homo sapiens (Human)        | SHAN2_HUMAN          |
| Q9BYB0               | SH3 and multiple ankyrin repeat domains protein 3 - Homo sapiens (Human)        | SHAN3_HUMAN          |
| O75368               | SH3 domain-binding glutamic acid-rich-like protein - Homo sapiens (Human)       | SH3L1_HUMAN          |
| Q99961               | SH3-containing GRB2-like protein 1 - Homo sapiens (Human)                       | SH3G1_HUMAN          |
| A0MZ66               | Shootin-1 - Homo sapiens (Human)                                                | SHOT1_HUMAN          |
| P45954               | Short/branched chain specific acyl-CoA dehydrogenase, mitochondrial precursor   | ACDSB_HUMAN          |
| Q5T5P2               | Sickle tail protein homolog - Homo sapiens (Human)                              | SKT_HUMAN            |
| P37108               | Signal recognition particle 14 kDa protein - Homo sapiens (Human)               | SRP14_HUMAN          |
| Q92783               | Signal transducing adapter molecule 1 - Homo sapiens (Human)                    | STAM1_HUMAN          |
| O75886               | Signal transducing adapter molecule 2 - Homo sapiens (Human)                    | STAM2_HUMAN          |
| O43166               | Signal-induced proliferation-associated 1-like protein 1 - Homo sapiens (Human) | SI1L1_HUMAN          |
| O60292               | Signal-induced proliferation-associated 1-like protein 3 - Homo sapiens (Human) | SI1L3_HUMAN          |
| Q96FS4               | Signal-induced proliferation-associated protein 1 - Homo sapiens (Human)        | SIPA1_HUMAN          |
| Q6GMV3               | Similar to CG14903-PA - Homo sapiens (Human)                                    | Q6GMV3_HUMAN         |
| Q6IA17               | Single Ig IL-1-related receptor - Homo sapiens (Human)                          | SIGIR_HUMAN          |
| Q04837               | Single-stranded DNA-binding protein, mitochondrial precursor - Homo sapiens (   | SSB_HUMAN            |
| Q29RF7               | Sister chromatid cohesion protein PDS5 homolog A - Homo sapiens (Human)         | PDS5A_HUMAN          |

| <i>Accession No*</i> | <i>Protein Name*</i>                                                            | <i>Reference No*</i> |
|----------------------|---------------------------------------------------------------------------------|----------------------|
| O60232               | Sjoegren syndrome/scleroderma autoantigen 1 - Homo sapiens (Human)              | SSA27_HUMAN          |
| Q9P270               | SLAIN motif family member 2 - Homo sapiens (Human)                              | Q9P270_HUMAN         |
| O00193               | Small acidic protein - Homo sapiens (Human)                                     | SMAP_HUMAN           |
| P84101               | Small EDRK-rich factor 2 - Homo sapiens (Human)                                 | SERF2_HUMAN          |
| O43765               | Small glutamine-rich tetratricopeptide repeat-containing protein A - Homo sapie | SGTA_HUMAN           |
| P62306               | Small nuclear ribonucleoprotein F - Homo sapiens (Human)                        | RUXF_HUMAN           |
| P61956               | Small ubiquitin-related modifier 2 precursor - Homo sapiens (Human)             | SUMO2_HUMAN          |
| Q6IN85               | SMEK homolog 1 - Homo sapiens (Human)                                           | SMEK1_HUMAN          |
| Q2TAL5               | Smoothelin-like 2 - Homo sapiens (Human)                                        | Q2TAL5_HUMAN         |
| P48764               | Sodium/hydrogen exchanger 3 - Homo sapiens (Human)                              | SL9A3_HUMAN          |
| P05023               | Sodium/potassium-transporting ATPase subunit alpha-1 precursor - Homo sapi      | AT1A1_HUMAN          |
| P05026               | Sodium/potassium-transporting ATPase subunit beta-1 - Homo sapiens (Human)      | AT1B1_HUMAN          |
| Q695T7               | Sodium-dependent neutral amino acid transporter B(0) - Homo sapiens (Human)     | S6A19_HUMAN          |
| P55011               | Solute carrier family 12 member 2 - Homo sapiens (Human)                        | S12A2_HUMAN          |
| Q9UHI7               | Solute carrier family 23 member 1 - Homo sapiens (Human)                        | S23A1_HUMAN          |
| Q495M3               | Solute carrier family 36 member 2 - Homo sapiens (Human)                        | Q495M3_HUMAN         |
| Q1EHB4               | Solute carrier family 5 member 12 - Homo sapiens (Human)                        | Q1EHB4_HUMAN         |
| P18583               | SON protein - Homo sapiens (Human)                                              | SON_HUMAN            |
| Q9UMY4               | Sorting nexin-12 - Homo sapiens (Human)                                         | SNX12_HUMAN          |
| O60749               | Sorting nexin-2 - Homo sapiens (Human)                                          | SNX2_HUMAN           |
| O60493               | Sorting nexin-3 - Homo sapiens (Human)                                          | SNX3_HUMAN           |
| O95219               | Sorting nexin-4 - Homo sapiens (Human)                                          | SNX4_HUMAN           |
| Q14515               | SPARC-like protein 1 precursor - Homo sapiens (Human)                           | SPRL1_HUMAN          |
| Q8N0X7               | Spartin - Homo sapiens (Human)                                                  | SPG20_HUMAN          |
| Q13813               | Spectrin alpha chain, brain - Homo sapiens (Human)                              | SPTA2_HUMAN          |
| Q01082               | Spectrin beta chain, brain 1 - Homo sapiens (Human)                             | SPTB2_HUMAN          |
| Q5M775               | Sperm antigen with calponin homology and coiled-coil domains 1 - Homo sapie     | SPEC1_HUMAN          |
| O75391               | Sperm-associated antigen 7 - Homo sapiens (Human)                               | SPAG7_HUMAN          |
| Q86XZ4               | Spermatogenesis-associated serine-rich protein 2. - Homo sapiens (Human)        | Q86XZ4_HUMAN         |
| P28290               | Sperm-specific antigen 2 - Homo sapiens (Human)                                 | SSFA2_HUMAN          |
| P63208               | S-phase kinase-associated protein 1A - Homo sapiens (Human)                     | SKP1_HUMAN           |
| Q15637               | Splicing factor 1 - Homo sapiens (Human)                                        | SF01_HUMAN           |
| Q15459               | Splicing factor 3 subunit 1 - Homo sapiens (Human)                              | SF3A1_HUMAN          |



| <i>Accession No*</i> | <i>Protein Name*</i>                                                         | <i>Reference No*</i> |
|----------------------|------------------------------------------------------------------------------|----------------------|
| Q75533               | Splicing factor 3B subunit 1 - Homo sapiens (Human)                          | SF3B1_HUMAN          |
| Q13435               | Splicing factor 3B subunit 2 - Homo sapiens (Human)                          | SF3B2_HUMAN          |
| Q07955               | Splicing factor, arginine/serine-rich 1 - Homo sapiens (Human)               | SFRS1_HUMAN          |
| Q8WXA9               | Splicing factor, arginine/serine-rich 12 - Homo sapiens (Human)              | SFR12_HUMAN          |
| Q95104               | Splicing factor, arginine/serine-rich 15 - Homo sapiens (Human)              | SFR15_HUMAN          |
| Q01130               | Splicing factor, arginine/serine-rich 2 - Homo sapiens (Human)               | SFRS2_HUMAN          |
| Q9BRL6               | Splicing factor, arginine/serine-rich 2B - Homo sapiens (Human)              | Q9BRL6_HUMAN         |
| P84103               | Splicing factor, arginine/serine-rich 3 - Homo sapiens (Human)               | SFRS3_HUMAN          |
| Q08170               | Splicing factor, arginine/serine-rich 4 - Homo sapiens (Human)               | SFRS4_HUMAN          |
| Q16629               | Splicing factor, arginine/serine-rich 7 - Homo sapiens (Human)               | SFRS7_HUMAN          |
| Q13242               | Splicing factor, arginine/serine-rich 9 - Homo sapiens (Human)               | SFRS9_HUMAN          |
| P23246               | Splicing factor, proline- and glutamine-rich - Homo sapiens (Human)          | SFPQ_HUMAN           |
| Q9GZT3               | SRA stem-loop-interacting RNA-binding protein, mitochondrial precursor - Hom | SLIRP_HUMAN          |
| Q14247               | Src substrate cortactin - Homo sapiens (Human)                               | SRC8_HUMAN           |
| P16949               | Stathmin - Homo sapiens (Human)                                              | STMN1_HUMAN          |
| Q9H2G2               | STE20-like serine/threonine-protein kinase - Homo sapiens (Human)            | SLK_HUMAN            |
| Q9HD15               | Steroid receptor RNA activator 1 - Homo sapiens (Human)                      | SRA1_HUMAN           |
| Q9UJZ1               | Stomatin-like protein 2 - Homo sapiens (Human)                               | STML2_HUMAN          |
| P38646               | Stress-70 protein, mitochondrial precursor - Homo sapiens (Human)            | GRP75_HUMAN          |
| P31948               | Stress-induced-phosphoprotein 1 - Homo sapiens (Human)                       | STIP1_HUMAN          |
| O43815               | Striatin - Homo sapiens (Human)                                              | STRN_HUMAN           |
| Q13586               | Stromal interaction molecule 1 precursor - Homo sapiens (Human)              | STIM1_HUMAN          |
| Q96I99               | Succinyl-CoA ligase [GDP-forming] beta-chain, mitochondrial precursor - Homo | SUCB2_HUMAN          |
| Q8NBJ7               | Sulfatase-modifying factor 2 precursor - Homo sapiens (Human)                | SUMF2_HUMAN          |
| P51687               | Sulfite oxidase, mitochondrial precursor - Homo sapiens (Human)              | SUOX_HUMAN           |
| P00441               | Superoxide dismutase [Cu-Zn] - Homo sapiens (Human)                          | SODC_HUMAN           |
| O95425               | Supervillin - Homo sapiens (Human)                                           | SVIL_HUMAN           |
| Q9Y2Z0               | Suppressor of G2 allele of SKP1 homolog - Homo sapiens (Human)               | SUGT1_HUMAN          |
| Q6N043               | Suppressor of hairy wing homolog 4 - Homo sapiens (Human)                    | SUHW4_HUMAN          |
| O43630               | SUV3-like protein 1 - Homo sapiens (Human)                                   | O43630_HUMAN         |
| Q92797               | Symplekin - Homo sapiens (Human)                                             | SYMPK_HUMAN          |
| Q8N3V7               | Synaptopodin - Homo sapiens (Human)                                          | SYNPO_HUMAN          |
| Q9UMS6               | Synaptopodin-2 - Homo sapiens (Human)                                        | SYNP2_HUMAN          |

| <i>Accession No*</i> | <i>Protein Name*</i>                                                           | <i>Reference No*</i> |
|----------------------|--------------------------------------------------------------------------------|----------------------|
| O00161               | Synaptosomal-associated protein 23 - Homo sapiens (Human)                      | SNP23_HUMAN          |
| Q95721               | Synaptosomal-associated protein 29 - Homo sapiens (Human)                      | SNP29_HUMAN          |
| P18827               | Syndecan-1 precursor - Homo sapiens (Human)                                    | SDC1_HUMAN           |
| P31431               | Syndecan-4 precursor - Homo sapiens (Human)                                    | SDC4_HUMAN           |
| Q13277               | Syntaxin-3 - Homo sapiens (Human)                                              | STX3_HUMAN           |
| Q12846               | Syntaxin-4 - Homo sapiens (Human)                                              | STX4_HUMAN           |
| O43752               | Syntaxin-6 - Homo sapiens (Human)                                              | STX6_HUMAN           |
| O15400               | Syntaxin-7 - Homo sapiens (Human)                                              | STX7_HUMAN           |
| Q9UNK0               | Syntaxin-8 - Homo sapiens (Human)                                              | STX8_HUMAN           |
| Q9Y490               | Talin-1 - Homo sapiens (Human)                                                 | TLN1_HUMAN           |
| Q86X74               | Target of myb1 - Homo sapiens (Human)                                          | Q86X74_HUMAN         |
| P82094               | TATA element modulatory factor - Homo sapiens (Human)                          | TMF1_HUMAN           |
| Q92804               | TATA-binding protein-associated factor 2N - Homo sapiens (Human)               | RBP56_HUMAN          |
| Q9BXI6               | TBC1 domain family member 10A - Homo sapiens (Human)                           | TB10A_HUMAN          |
| Q92609               | TBC1 domain family member 5 - Homo sapiens (Human)                             | TBCD5_HUMAN          |
| Q9NYB0               | Telomeric repeat-binding factor 2-interacting protein 1 - Homo sapiens (Human) | TE2IP_HUMAN          |
| P24821               | Tenascin precursor - Homo sapiens (Human)                                      | TENA_HUMAN           |
| Q9HBL0               | Tensin-1 - Homo sapiens (Human)                                                | TENS1_HUMAN          |
| Q68CZ2               | Tensin-3 - Homo sapiens (Human)                                                | TENS3_HUMAN          |
| Q63HR2               | Tensin-like C1 domain-containing phosphatase - Homo sapiens (Human)            | TENC1_HUMAN          |
| Q9H0U9               | Testis-specific Y-encoded-like protein 1 - Homo sapiens (Human)                | TSYL1_HUMAN          |
| Q9BZE9               | Tether containing UBX domain for GLUT4 - Homo sapiens (Human)                  | ASPC1_HUMAN          |
| Q9BU02               | Thiamine-triphosphatase - Homo sapiens (Human)                                 | THTPA_HUMAN          |
| P10599               | Thioredoxin - Homo sapiens (Human)                                             | THIO_HUMAN           |
| Q9H3N1               | Thioredoxin domain-containing protein 1 precursor - Homo sapiens (Human)       | TXND1_HUMAN          |
| Q95881               | Thioredoxin domain-containing protein 12 precursor - Homo sapiens (Human)      | TXD12_HUMAN          |
| Q9BS26               | Thioredoxin domain-containing protein 4 precursor - Homo sapiens (Human)       | TXND4_HUMAN          |
| Q99757               | Thioredoxin, mitochondrial precursor - Homo sapiens (Human)                    | THIOM_HUMAN          |
| P30048               | Thioredoxin-dependent peroxide reductase, mitochondrial precursor - Homo sap   | PRDX3_HUMAN          |
| Q9BRA2               | Thioredoxin-like protein 5 - Homo sapiens (Human)                              | TXNL5_HUMAN          |
| Q8WWX9               | Thioredoxin-like selenoprotein M precursor - Homo sapiens (Human)              | SELM_HUMAN           |
| Q86V81               | THO complex subunit 4 - Homo sapiens (Human)                                   | THOC4_HUMAN          |
| P07996               | Thrombospondin-1 precursor - Homo sapiens (Human)                              | TSP1_HUMAN           |

| <i>Accession No*</i> | <i>Protein Name*</i>                                                            | <i>Reference No*</i> |
|----------------------|---------------------------------------------------------------------------------|----------------------|
| P63313               | Thymosin beta-10 - Homo sapiens (Human)                                         | TYB10_HUMAN          |
| Q9Y2W1               | Thyroid hormone receptor-associated protein 3 - Homo sapiens (Human)            | TR150_HUMAN          |
| Q15643               | Thyroid receptor-interacting protein 11 - Homo sapiens (Human)                  | TRIPB_HUMAN          |
| Q07157               | Tight junction protein ZO-1 - Homo sapiens (Human)                              | ZO1_HUMAN            |
| Q9UDY2               | Tight junction protein ZO-2 - Homo sapiens (Human)                              | ZO2_HUMAN            |
| Q6ZVM7               | TOM1-like protein 2 - Homo sapiens (Human)                                      | TM1L2_HUMAN          |
| Q5JTV8               | Torsin-1A-interacting protein 1 - Homo sapiens (Human)                          | TOIP1_HUMAN          |
| Q8NFK8               | Torsin-1A-interacting protein 2 - Homo sapiens (Human)                          | TOIP2_HUMAN          |
| O43715               | TP53-regulated inhibitor of apoptosis 1 - Homo sapiens (Human)                  | TRIA1_HUMAN          |
| Q9UKE5               | TRAF2 and NCK-interacting protein kinase - Homo sapiens (Human)                 | TNIK_HUMAN           |
| O14545               | TRAF-type zinc finger domain-containing protein 1 - Homo sapiens (Human)        | TRAD1_HUMAN          |
| P23193               | Transcription elongation factor A protein 1 - Homo sapiens (Human)              | TCEA1_HUMAN          |
| Q9H3H9               | Transcription elongation factor A protein-like 2 - Homo sapiens (Human)         | TCAL2_HUMAN          |
| Q969E4               | Transcription elongation factor A protein-like 3 - Homo sapiens (Human)         | TCAL3_HUMAN          |
| Q96EI5               | Transcription elongation factor A protein-like 4 - Homo sapiens (Human)         | TCAL4_HUMAN          |
| Q6IPX3               | Transcription elongation factor A protein-like 6 - Homo sapiens (Human)         | TCAL6_HUMAN          |
| O00267               | Transcription elongation factor SPT5 - Homo sapiens (Human)                     | SPT5H_HUMAN          |
| Q7KZ85               | Transcription elongation factor SPT6 - Homo sapiens (Human)                     | SPT6H_HUMAN          |
| Q00059               | Transcription factor A, mitochondrial precursor - Homo sapiens (Human)          | TFAM_HUMAN           |
| P20290               | Transcription factor BTF3 - Homo sapiens (Human)                                | BTF3_HUMAN           |
| Q13891               | Transcription factor BTF3 homolog 2 - Homo sapiens (Human)                      | BT3L2_HUMAN          |
| P35269               | Transcription initiation factor IIF subunit alpha - Homo sapiens (Human)        | T2FA_HUMAN           |
| Q13263               | Transcription intermediary factor 1-beta - Homo sapiens (Human)                 | TIF1B_HUMAN          |
| Q00577               | Transcriptional activator protein Pur-alpha - Homo sapiens (Human)              | PURA_HUMAN           |
| Q86YP4               | Transcriptional repressor p66 alpha - Homo sapiens (Human)                      | P66A_HUMAN           |
| Q8WXI9               | Transcriptional repressor p66 beta - Homo sapiens (Human)                       | P66B_HUMAN           |
| Q04726               | Transducin-like enhancer protein 3 - Homo sapiens (Human)                       | TLE3_HUMAN           |
| O75410               | Transforming acidic coiled-coil-containing protein 1 - Homo sapiens (Human)     | TACC1_HUMAN          |
| O95359               | Transforming acidic coiled-coil-containing protein 2 - Homo sapiens (Human)     | TACC2_HUMAN          |
| O43294               | Transforming growth factor beta-1-induced transcript 1 protein - Homo sapiens ( | TGF11_HUMAN          |
| Q01995               | Transgelin - Homo sapiens (Human)                                               | TAGL_HUMAN           |
| P37802               | Transgelin-2 - Homo sapiens (Human)                                             | TAGL2_HUMAN          |
| O43493               | Trans-Golgi network integral membrane protein 2 precursor - Homo sapiens (Hu    | TGON2_HUMAN          |

| <i>Accession No*</i> | <i>Protein Name*</i>                                                          | <i>Reference No*</i> |
|----------------------|-------------------------------------------------------------------------------|----------------------|
| Q9HBA0               | Transient receptor potential cation channel subfamily V member 4 - Homo sapie | TRPV4_HUMAN          |
| P55072               | Transitional endoplasmic reticulum ATPase - Homo sapiens (Human)              | TERA_HUMAN           |
| Q6IEE7               | Transmembrane protein 132E precursor - Homo sapiens (Human)                   | T132E_HUMAN          |
| Q9NW97               | Transmembrane protein 51 - Homo sapiens (Human)                               | TMM51_HUMAN          |
| P02766               | Transthyretin precursor - Homo sapiens (Human)                                | TTHY_HUMAN           |
| Q9UPQ9               | Trinucleotide repeat-containing 6B protein - Homo sapiens (Human)             | TNC6B_HUMAN          |
| Q9H2D6               | TRIO and F-actin-binding protein - Homo sapiens (Human)                       | TARA_HUMAN           |
| P60174               | Triosephosphate isomerase - Homo sapiens (Human)                              | TPIS_HUMAN           |
| Q14CA3               | TRIP12 protein - Homo sapiens (Human)                                         | Q14CA3_HUMAN         |
| O14773               | Tripeptidyl-peptidase 1 precursor - Homo sapiens (Human)                      | TPP1_HUMAN           |
| Q96G46               | tRNA-dihydrouridine synthase 3-like - Homo sapiens (Human)                    | DUS3L_HUMAN          |
| Q9NYL9               | Tropomodulin-3 - Homo sapiens (Human)                                         | TMOD3_HUMAN          |
| Q1ZYL5               | Tropomyosin 1 alpha variant 6 - Homo sapiens (Human)                          | Q1ZYL5_HUMAN         |
| Q5TCU3               | Tropomyosin 2 - Homo sapiens (Human)                                          | Q5TCU3_HUMAN         |
| P67936               | Tropomyosin alpha-4 chain - Homo sapiens (Human)                              | TPM4_HUMAN           |
| Q9Y3Q8               | TSC22 domain family protein 4 - Homo sapiens (Human)                          | T22D4_HUMAN          |
| P49815               | Tuberin - Homo sapiens (Human)                                                | TSC2_HUMAN           |
| Q99426               | Tubulin folding cofactor B - Homo sapiens (Human)                             | TBCB_HUMAN           |
| Q9BW30               | Tubulin polymerization-promoting protein family member 3 - Homo sapiens (Hu   | TPPP3_HUMAN          |
| O75347               | Tubulin-specific chaperone A - Homo sapiens (Human)                           | TBCA_HUMAN           |
| Q15813               | Tubulin-specific chaperone E - Homo sapiens (Human)                           | TBCE_HUMAN           |
| Q12888               | Tumor suppressor p53-binding protein 1 - Homo sapiens (Human)                 | TP53B_HUMAN          |
| Q9H792               | Tyrosine-protein kinase Sgk269 - Homo sapiens (Human)                         | SG269_HUMAN          |
| Q06124               | Tyrosine-protein phosphatase non-receptor type 11 - Homo sapiens (Human)      | PTN11_HUMAN          |
| Q05209               | Tyrosine-protein phosphatase non-receptor type 12 - Homo sapiens (Human)      | PTN12_HUMAN          |
| P08621               | U1 small nuclear ribonucleoprotein 70 kDa - Homo sapiens (Human)              | RU17_HUMAN           |
| P09661               | U2 small nuclear ribonucleoprotein A' - Homo sapiens (Human)                  | RU2A_HUMAN           |
| O15042               | U2-associated protein SR140 - Homo sapiens (Human)                            | SR140_HUMAN          |
| Q9BVJ6               | U3 small nucleolar RNA-associated protein 14 homolog A - Homo sapiens (Hu     | UT14A_HUMAN          |
| O43290               | U4/U6.U5 tri-snRNP-associated protein 1 - Homo sapiens (Human)                | SNUT1_HUMAN          |
| O75643               | U5 small nuclear ribonucleoprotein 200 kDa helicase - Homo sapiens (Human)    | U520_HUMAN           |
| Q9UMX0               | Ubiquilin-1 - Homo sapiens (Human)                                            | UBQL1_HUMAN          |
| P07919               | Ubiquinol-cytochrome c reductase complex 11 kDa protein, mitochondrial precu  | UCRH_HUMAN           |

| <i>Accession No*</i> | <i>Protein Name*</i>                                                          | <i>Reference No*</i> |
|----------------------|-------------------------------------------------------------------------------|----------------------|
| P22695               | Ubiquinol-cytochrome-c reductase complex core protein 2, mitochondrial precur | UQCR2_HUMAN          |
| P40818               | Ubiquitin carboxyl-terminal hydrolase 8 - Homo sapiens (Human)                | UBP8_HUMAN           |
| P09936               | Ubiquitin carboxyl-terminal hydrolase isozyme L1 - Homo sapiens (Human)       | UCHL1_HUMAN          |
| O14562               | Ubiquitin domain-containing protein UBFD1 - Homo sapiens (Human)              | UBFD1_HUMAN          |
| Q9NZ09               | Ubiquitin-associated protein 1 - Homo sapiens (Human)                         | UBAP1_HUMAN          |
| Q14157               | Ubiquitin-associated protein 2-like - Homo sapiens (Human)                    | UBP2L_HUMAN          |
| P30085               | UMP-CMP kinase - Homo sapiens (Human)                                         | KCY_HUMAN            |
| Q8IXM2               | Uncharacterized potential DNA-binding protein C17orf49 - Homo sapiens (Hum    | CQ049_HUMAN          |
| Q96A22               | Uncharacterized protein C11orf52 - Homo sapiens (Human)                       | CK052_HUMAN          |
| Q9H9C1               | Uncharacterized protein C14orf133 - Homo sapiens (Human)                      | CN133_HUMAN          |
| Q7Z6K5               | Uncharacterized protein C15orf38 - Homo sapiens (Human)                       | CO038_HUMAN          |
| Q9BUT9               | Uncharacterized protein C16orf14 - Homo sapiens (Human)                       | CP014_HUMAN          |
| Q96B23               | Uncharacterized protein C18orf25 - Homo sapiens (Human)                       | CR025_HUMAN          |
| Q8IVT2               | Uncharacterized protein C19orf21 - Homo sapiens (Human)                       | CS021_HUMAN          |
| Q9BQ61               | Uncharacterized protein C19orf43 - Homo sapiens (Human)                       | CS043_HUMAN          |
| Q9H0W8               | Uncharacterized protein C19orf61 - Homo sapiens (Human)                       | CS061_HUMAN          |
| Q9NWW8               | Uncharacterized protein C19orf62 - Homo sapiens (Human)                       | CS062_HUMAN          |
| Q9BW04               | Uncharacterized protein C1orf116 - Homo sapiens (Human)                       | Q9BW04_HUMAN         |
| Q9H425               | Uncharacterized protein C1orf198 - Homo sapiens (Human)                       | CA198_HUMAN          |
| Q5JTJ3               | Uncharacterized protein C1orf31 - Homo sapiens (Human)                        | CA031_HUMAN          |
| Q9BV19               | Uncharacterized protein C1orf50 - Homo sapiens (Human)                        | CA050_HUMAN          |
| Q96HY6               | Uncharacterized protein C20orf116 precursor - Homo sapiens (Human)            | CT116_HUMAN          |
| Q9GZY8               | Uncharacterized protein C2orf33 - Homo sapiens (Human)                        | CB033_HUMAN          |
| Q6NV74               | Uncharacterized protein C2orf55 - Homo sapiens (Human)                        | CB055_HUMAN          |
| Q9P0P8               | Uncharacterized protein C6orf203 - Homo sapiens (Human)                       | CF203_HUMAN          |
| Q6P6B1               | Uncharacterized protein C8orf47 - Homo sapiens (Human)                        | CH047_HUMAN          |
| Q9BUH6               | Uncharacterized protein C9orf142 - Homo sapiens (Human)                       | CI142_HUMAN          |
| Q9NZ63               | Uncharacterized protein C9orf78 - Homo sapiens (Human)                        | CI078_HUMAN          |
| Q15018               | Uncharacterized protein KIAA0157 - Homo sapiens (Human)                       | K0157_HUMAN          |
| Q93073               | Uncharacterized protein KIAA0256 - Homo sapiens (Human)                       | K0256_HUMAN          |
| Q5VT52               | Uncharacterized protein KIAA0460 - Homo sapiens (Human)                       | K0460_HUMAN          |
| O94909               | Uncharacterized protein KIAA0819 - Homo sapiens (Human)                       | K0819_HUMAN          |
| Q96AT1               | Uncharacterized protein KIAA1143 - Homo sapiens (Human)                       | K1143_HUMAN          |

| <i>Accession No*</i> | <i>Protein Name*</i>                                                          | <i>Reference No*</i> |
|----------------------|-------------------------------------------------------------------------------|----------------------|
| Q9P1Y5               | Uncharacterized protein KIAA1543 - Homo sapiens (Human)                       | K1543_HUMAN          |
| Q9BY89               | Uncharacterized protein KIAA1671 - Homo sapiens (Human)                       | K1671_HUMAN          |
| Q8IXQ4               | Uncharacterized protein KIAA1704 - Homo sapiens (Human)                       | K1704_HUMAN          |
| Q9C0F1               | Uncharacterized protein KIAA1712 - Homo sapiens (Human)                       | K1712_HUMAN          |
| Q9P0R6               | UPF0279 protein C14orf129 - Homo sapiens (Human)                              | CN129_HUMAN          |
| Q9NZB2               | UPF0318 protein FAM120A - Homo sapiens (Human)                                | F120A_HUMAN          |
| Q9BVG4               | UPF0368 protein Cxorf26 - Homo sapiens (Human)                                | CX026_HUMAN          |
| Q5VUM1               | UPF0369 protein C6orf57 precursor - Homo sapiens (Human)                      | CF057_HUMAN          |
| Q9Y3C1               | UPF0384 protein CGI-117 - Homo sapiens (Human)                                | U384_HUMAN           |
| Q9UFG5               | UPF0449 protein C19orf25 - Homo sapiens (Human)                               | CS025_HUMAN          |
| P07911               | Uromodulin precursor - Homo sapiens (Human)                                   | UROM_HUMAN           |
| P54725               | UV excision repair protein RAD23 homolog A - Homo sapiens (Human)             | RD23A_HUMAN          |
| P54727               | UV excision repair protein RAD23 homolog B - Homo sapiens (Human)             | RD23B_HUMAN          |
| Q9BZF9               | Uveal autoantigen with coiled-coil domains and ankyrin repeats - Homo sapiens | UACA_HUMAN           |
| P38606               | Vacuolar ATP synthase catalytic subunit A - Homo sapiens (Human)              | VATA_HUMAN           |
| P36543               | Vacuolar ATP synthase subunit E 1 - Homo sapiens (Human)                      | VATE1_HUMAN          |
| Q16864               | Vacuolar ATP synthase subunit F - Homo sapiens (Human)                        | VATF_HUMAN           |
| O75348               | Vacuolar ATP synthase subunit G 1 - Homo sapiens (Human)                      | VATG1_HUMAN          |
| A5D8V6               | Vacuolar protein sorting 37 homolog C - Homo sapiens (Human)                  | A5D8V6_HUMAN         |
| Q9BRG1               | Vacuolar protein-sorting-associated protein 25 - Homo sapiens (Human)         | VPS25_HUMAN          |
| P50552               | Vasodilator-stimulated phosphoprotein - Homo sapiens (Human)                  | VASP_HUMAN           |
| Q6EMK4               | Vasorin precursor - Homo sapiens (Human)                                      | VASN_HUMAN           |
| P13611               | Versican core protein precursor - Homo sapiens (Human)                        | CSPG2_HUMAN          |
| Q9UEU0               | Vesicle transport through interaction with t-SNAREs homolog 1B - Homo sapien  | VTI1B_HUMAN          |
| Q15836               | Vesicle-associated membrane protein 3 - Homo sapiens (Human)                  | VAMP3_HUMAN          |
| Q9BV40               | Vesicle-associated membrane protein 8 - Homo sapiens (Human)                  | VAMP8_HUMAN          |
| Q9P0L0               | Vesicle-associated membrane protein-associated protein A - Homo sapiens (Hu   | VAPA_HUMAN           |
| O95292               | Vesicle-associated membrane protein-associated protein B/C - Homo sapiens (   | VAPB_HUMAN           |
| P46459               | Vesicle-fusing ATPase - Homo sapiens (Human)                                  | NSF_HUMAN            |
| O75396               | Vesicle-trafficking protein SEC22b - Homo sapiens (Human)                     | SC22B_HUMAN          |
| Q00341               | Vigilin - Homo sapiens (Human)                                                | VIGLN_HUMAN          |
| P09327               | Villin-1 - Homo sapiens (Human)                                               | VILI_HUMAN           |
| P08670               | Vimentin - Homo sapiens (Human)                                               | VIME_HUMAN           |

| <i>Accession No*</i> | <i>Protein Name*</i>                                                       | <i>Reference No*</i> |
|----------------------|----------------------------------------------------------------------------|----------------------|
| P18206               | Vinculin - Homo sapiens (Human)                                            | VINC_HUMAN           |
| P04004               | Vitronectin precursor - Homo sapiens (Human)                               | VTNC_HUMAN           |
| Q8TF74               | WAS/WASL-interacting protein family member 2 - Homo sapiens (Human)        | WIPF2_HUMAN          |
| Q96JK2               | WD repeat protein 22 - Homo sapiens (Human)                                | WDR22_HUMAN          |
| Q9C0J8               | WD repeat protein 33 - Homo sapiens (Human)                                | WDR33_HUMAN          |
| Q5TAQ9               | WD repeat protein 42A - Homo sapiens (Human)                               | WD42A_HUMAN          |
| Q5JSH3               | WD repeat protein 44 - Homo sapiens (Human)                                | WDR44_HUMAN          |
| Q7Z5K2               | Wings apart-like protein homolog - Homo sapiens (Human)                    | WAPL_HUMAN           |
| Q9Y2W2               | WW domain-binding protein 11 - Homo sapiens (Human)                        | WBP11_HUMAN          |
| P49750               | YLP motif-containing protein 1 - Homo sapiens (Human)                      | YLPM1_HUMAN          |
| Q9BYJ9               | YTH domain family protein 1 - Homo sapiens (Human)                         | YTHD1_HUMAN          |
| Q7Z739               | YTH domain family protein 3 - Homo sapiens (Human)                         | YTHD3_HUMAN          |
| Q96MU7               | YTH domain-containing protein 1 - Homo sapiens (Human)                     | YTDC1_HUMAN          |
| Q8IY57               | YY1-associated factor 2 - Homo sapiens (Human)                             | YAF2_HUMAN           |
| Q8TBC5               | Zinc finger and SCAN domain-containing protein 18 - Homo sapiens (Human)   | ZSC18_HUMAN          |
| O75152               | Zinc finger CCCH domain-containing protein 11A - Homo sapiens (Human)      | ZC11A_HUMAN          |
| Q9C0B0               | Zinc finger CCCH domain-containing protein 5 - Homo sapiens (Human)        | ZC3H5_HUMAN          |
| Q9UPT8               | Zinc finger CCCH domain-containing protein C19orf7 - Homo sapiens (Human)  | CS007_HUMAN          |
| Q7Z2W4               | Zinc finger CCCH type antiviral protein 1 - Homo sapiens (Human)           | ZCC2_HUMAN           |
| Q7Z3T8               | Zinc finger FYVE domain-containing protein 16 - Homo sapiens (Human)       | ZFY16_HUMAN          |
| Q9UQR1               | Zinc finger protein 148 - Homo sapiens (Human)                             | ZN148_HUMAN          |
| A4FTV3               | Zinc finger protein 185 - Homo sapiens (Human)                             | A4FTV3_HUMAN         |
| A0AVJ9               | Zinc finger protein 37 homolog - Homo sapiens (Human)                      | A0AVJ9_HUMAN         |
| Q14966               | Zinc finger protein 638 - Homo sapiens (Human)                             | ZN638_HUMAN          |
| Q96JP5               | Zinc finger protein 91 homolog - Homo sapiens (Human)                      | ZFP91_HUMAN          |
| Q96JM3               | Zinc finger protein KIAA1802 - Homo sapiens (Human)                        | K1802_HUMAN          |
| O75312               | Zinc finger protein ZPR1 - Homo sapiens (Human)                            | ZPR1_HUMAN           |
| O95218               | Zinc finger Ran-binding domain-containing protein 2 - Homo sapiens (Human) | ZRAB2_HUMAN          |
| Q6PML9               | Zinc transporter 9 - Homo sapiens (Human)                                  | ZNT9_HUMAN           |
| Q15942               | Zyxin - Homo sapiens (Human)                                               | ZYX_HUMAN            |
