# Supplementary material
Source: PubMed Central journal article supplement (PMC3251958)
Supplement: NIHMS175878-supplement-8_si_008.pdf [file NIHMS175878-supplement-8_si_008.pdf]

## Table S-3b

**A list of 179 proteins identified in plasma by at least 2 protein-specific peptides, sorted by protein name.**

*\*MS/MS spectra were searched against the UniProt Human proteomic database; release 09/07.*

| <i>Accession No*</i> | <i>Protein Name*</i>                                                                | <i>Reference No*</i> |
|----------------------|-------------------------------------------------------------------------------------|----------------------|
| Q9BR61               | Acyl-CoA-binding domain-containing protein 6 - Homo sapiens (Human)                 | ACBD6_HUMAN          |
| P43652               | Afamin precursor - Homo sapiens (Human)                                             | AFAM_HUMAN           |
| P02763               | Alpha-1-acid glycoprotein 1 precursor - Homo sapiens (Human)                        | A1AG1_HUMAN          |
| P19652               | Alpha-1-acid glycoprotein 2 precursor - Homo sapiens (Human)                        | A1AG2_HUMAN          |
| P01011               | Alpha-1-antichymotrypsin precursor - Homo sapiens (Human)                           | AACT_HUMAN           |
| P01009               | Alpha-1-antitrypsin precursor - Homo sapiens (Human)                                | A1AT_HUMAN           |
| P08697               | Alpha-2-antiplasmin precursor - Homo sapiens (Human)                                | A2AP_HUMAN           |
| P02765               | Alpha-2-HS-glycoprotein precursor - Homo sapiens (Human)                            | FETUA_HUMAN          |
| P01023               | Alpha-2-macroglobulin precursor - Homo sapiens (Human)                              | A2MG_HUMAN           |
| Q16706               | Alpha-mannosidase 2 - Homo sapiens (Human)                                          | MA2A1_HUMAN          |
| P02760               | AMBP protein precursor [Contains: Alpha-1-microglobulin - Homo sapiens (Human)]     | AMBP_HUMAN           |
| P15144               | Aminopeptidase N - Homo sapiens (Human)                                             | AMPN_HUMAN           |
| P01019               | Angiotensinogen precursor - Homo sapiens (Human)                                    | ANGT_HUMAN           |
| Q7KZ97               | Antithrombin III variant - Homo sapiens (Human)                                     | Q7KZ97_HUMAN         |
| P02647               | Apolipoprotein A-I precursor - Homo sapiens (Human)                                 | APOA1_HUMAN          |
| P02652               | Apolipoprotein A-II precursor - Homo sapiens (Human)                                | APOA2_HUMAN          |
| P06727               | Apolipoprotein A-IV precursor - Homo sapiens (Human)                                | APOA4_HUMAN          |
| P04114               | Apolipoprotein B-100 precursor - Homo sapiens (Human)                               | APOB_HUMAN           |
| P02654               | Apolipoprotein C-I precursor - Homo sapiens (Human)                                 | APOC1_HUMAN          |
| P02655               | Apolipoprotein C-II precursor - Homo sapiens (Human)                                | APOC2_HUMAN          |
| P02656               | Apolipoprotein C-III precursor - Homo sapiens (Human)                               | APOC3_HUMAN          |
| P55056               | Apolipoprotein C-IV precursor - Homo sapiens (Human)                                | APOC4_HUMAN          |
| P02649               | Apolipoprotein E precursor - Homo sapiens (Human)                                   | APOE_HUMAN           |
| Q13790               | Apolipoprotein F precursor - Homo sapiens (Human)                                   | APOF_HUMAN           |
| O75882               | Attractin precursor - Homo sapiens (Human)                                          | ATRN_HUMAN           |
| P98160               | Basement membrane-specific heparan sulfate proteoglycan core protein precursor - Ho | PGBM_HUMAN           |
| P02749               | Beta-2-glycoprotein 1 precursor - Homo sapiens (Human)                              | APOH_HUMAN           |

| <i>Accession No*</i> | <i>Protein Name*</i>                                                           | <i>Reference No*</i> |
|----------------------|--------------------------------------------------------------------------------|----------------------|
| Q96KN2               | Beta-Ala-His dipeptidase precursor - Homo sapiens (Human)                      | CNDP1_HUMAN          |
| P43251               | Biotinidase precursor - Homo sapiens (Human)                                   | BTD_HUMAN            |
| P80723               | Brain acid soluble protein 1 - Homo sapiens (Human)                            | BASP_HUMAN           |
| P04003               | C4b-binding protein alpha chain precursor - Homo sapiens (Human)               | C4BP_HUMAN           |
| P55287               | Cadherin-11 precursor - Homo sapiens (Human)                                   | CAD11_HUMAN          |
| P33151               | Cadherin-5 precursor - Homo sapiens (Human)                                    | CADH5_HUMAN          |
| Q96IY4               | Carboxypeptidase B2 precursor - Homo sapiens (Human)                           | CBPB2_HUMAN          |
| P15169               | Carboxypeptidase N catalytic chain precursor - Homo sapiens (Human)            | CBPN_HUMAN           |
| P22792               | Carboxypeptidase N subunit 2 precursor - Homo sapiens (Human)                  | CPN2_HUMAN           |
| Q9NQ79               | Cartilage acidic protein 1 precursor - Homo sapiens (Human)                    | CRAC1_HUMAN          |
| P49747               | Cartilage oligomeric matrix protein precursor - Homo sapiens (Human)           | COMP_HUMAN           |
| P43121               | Cell surface glycoprotein MUC18 precursor - Homo sapiens (Human)               | MUC18_HUMAN          |
| P00450               | Ceruloplasmin precursor - Homo sapiens (Human)                                 | CERU_HUMAN           |
| P06276               | Cholinesterase precursor - Homo sapiens (Human)                                | CHLE_HUMAN           |
| P10909               | Clusterin precursor - Homo sapiens (Human)                                     | CLUS_HUMAN           |
| P00740               | Coagulation factor IX precursor - Homo sapiens (Human)                         | FA9_HUMAN            |
| P00742               | Coagulation factor X precursor - Homo sapiens (Human)                          | FA10_HUMAN           |
| P03951               | Coagulation factor XI precursor - Homo sapiens (Human)                         | FA11_HUMAN           |
| P00748               | Coagulation factor XII precursor - Homo sapiens (Human)                        | FA12_HUMAN           |
| P00488               | Coagulation factor XIII A chain precursor - Homo sapiens (Human)               | F13A_HUMAN           |
| P05160               | Coagulation factor XIII B chain precursor - Homo sapiens (Human)               | F13B_HUMAN           |
| P12111               | Collagen alpha-3(VI) chain precursor - Homo sapiens (Human)                    | CO6A3_HUMAN          |
| P02747               | Complement C1q subcomponent subunit C precursor - Homo sapiens (Human)         | C1QC_HUMAN           |
| P00736               | Complement C1r subcomponent precursor - Homo sapiens (Human)                   | C1R_HUMAN            |
| P09871               | Complement C1s subcomponent precursor - Homo sapiens (Human)                   | C1S_HUMAN            |
| P01024               | Complement C3 precursor [Contains: Complement C3 beta chain; Complement C3 alp | CO3_HUMAN            |
| P01031               | Complement C5 precursor [Contains: Complement C5 beta chain; Complement C5 alp | CO5_HUMAN            |
| P13671               | Complement component C6 precursor - Homo sapiens (Human)                       | CO6_HUMAN            |
| P10643               | Complement component C7 precursor - Homo sapiens (Human)                       | CO7_HUMAN            |
| P07357               | Complement component C8 alpha chain precursor - Homo sapiens (Human)           | CO8A_HUMAN           |

| <i>Accession No*</i> | <i>Protein Name*</i>                                                                    | <i>Reference No*</i> |
|----------------------|-----------------------------------------------------------------------------------------|----------------------|
| P07358               | Complement component C8 beta chain precursor - Homo sapiens (Human)                     | CO8B_HUMAN           |
| P07360               | Complement component C8 gamma chain precursor - Homo sapiens (Human)                    | CO8G_HUMAN           |
| P02748               | Complement component C9 precursor [Contains: Complement component C9a; Compl            | CO9_HUMAN            |
| P00751               | Complement factor B precursor - Homo sapiens (Human)                                    | CFAB_HUMAN           |
| P08603               | Complement factor H precursor - Homo sapiens (Human)                                    | CFAH_HUMAN           |
| Q12860               | Contactin-1 precursor - Homo sapiens (Human)                                            | CNTN1_HUMAN          |
| P08185               | Corticosteroid-binding globulin precursor - Homo sapiens (Human)                        | CBG_HUMAN            |
| P01034               | Cystatin-C precursor - Homo sapiens (Human)                                             | CYTC_HUMAN           |
| Q9BUQ8               | DEAD box protein 23 - Homo sapiens (Human)                                              | DDX23_HUMAN          |
| P09172               | Dopamine beta-hydroxylase precursor - Homo sapiens (Human)                              | DOPO_HUMAN           |
| Q12805               | EGF-containing fibulin-like extracellular matrix protein 1 precursor - Homo sapiens (Hu | FBLN3_HUMAN          |
| P17813               | Endoglin precursor - Homo sapiens (Human)                                               | EGLN_HUMAN           |
| P14625               | Endoplasmin precursor - Homo sapiens (Human)                                            | ENPL_HUMAN           |
| P08294               | Extracellular superoxide dismutase [Cu-Zn] precursor - Homo sapiens (Human)             | SODE_HUMAN           |
| P02671               | Fibrinogen alpha chain precursor [Contains: Fibrinopeptide A] - Homo sapiens (Human)    | FIBA_HUMAN           |
| P02675               | Fibrinogen beta chain precursor [Contains: Fibrinopeptide B] - Homo sapiens (Human)     | FIBB_HUMAN           |
| P02679               | Fibrinogen gamma chain precursor - Homo sapiens (Human)                                 | FIBG_HUMAN           |
| P02751               | Fibronectin precursor - Homo sapiens (Human)                                            | FINC_HUMAN           |
| P23142               | Fibulin-1 precursor - Homo sapiens (Human)                                              | FBLN1_HUMAN          |
| O75636               | Ficolin-3 precursor - Homo sapiens (Human)                                              | FCN3_HUMAN           |
| P20930               | Filaggrin - Homo sapiens (Human)                                                        | FILA_HUMAN           |
| Q12841               | Follistatin-related protein 1 precursor - Homo sapiens (Human)                          | FSTL1_HUMAN          |
| P04075               | Fructose-bisphosphate aldolase A - Homo sapiens (Human)                                 | ALDOA_HUMAN          |
| Q08380               | Galectin-3-binding protein precursor - Homo sapiens (Human)                             | LG3BP_HUMAN          |
| P06396               | Gelsolin precursor - Homo sapiens (Human)                                               | GELS_HUMAN           |
| Q8TEQ6               | Gem-associated protein 5 - Homo sapiens (Human)                                         | GEMI5_HUMAN          |
| P22352               | Glutathione peroxidase 3 precursor - Homo sapiens (Human)                               | GPX3_HUMAN           |
| P00738               | Haptoglobin precursor [Contains: Haptoglobin alpha chain; Haptoglobin beta chain] - Ho  | HPT_HUMAN            |
| P00739               | Haptoglobin-related protein precursor - Homo sapiens (Human)                            | HPTR_HUMAN           |
| P02790               | Hemopexin precursor - Homo sapiens (Human)                                              | HEMO_HUMAN           |

| <i>Accession No*</i> | <i>Protein Name*</i>                                                                     | <i>Reference No*</i> |
|----------------------|------------------------------------------------------------------------------------------|----------------------|
| P05546               | Heparin cofactor 2 precursor - Homo sapiens (Human)                                      | HEP2_HUMAN           |
| Q04756               | Hepatocyte growth factor activator precursor - Homo sapiens (Human)                      | HGFA_HUMAN           |
| P26927               | Hepatocyte growth factor-like protein precursor - Homo sapiens (Human)                   | HGFL_HUMAN           |
| P04196               | Histidine-rich glycoprotein precursor - Homo sapiens (Human)                             | HRG_HUMAN            |
| Q86YZ3               | Hornerin - Homo sapiens (Human)                                                          | HORN_HUMAN           |
| Q2KHP4               | HSPA5 protein - Homo sapiens (Human)                                                     | Q2KHP4_HUMA          |
| Q14520               | Hyaluronan-binding protein 2 precursor - Homo sapiens (Human)                            | HABP2_HUMAN          |
| Q9Y6R7               | IgGfC-binding protein precursor - Homo sapiens (Human)                                   | FCGBP_HUMAN          |
| P35858               | Insulin-like growth factor-binding protein complex acid labile chain precursor - Homo sa | ALS_HUMAN            |
| P19827               | Inter-alpha-trypsin inhibitor heavy chain H1 precursor - Homo sapiens (Human)            | ITIH1_HUMAN          |
| Q06033               | Inter-alpha-trypsin inhibitor heavy chain H3 precursor - Homo sapiens (Human)            | ITIH3_HUMAN          |
| Q14624               | Inter-alpha-trypsin inhibitor heavy chain H4 precursor - Homo sapiens (Human)            | ITIH4_HUMAN          |
| P13598               | Intercellular adhesion molecule 2 precursor - Homo sapiens (Human)                       | ICAM2_HUMAN          |
| P29622               | Kallistatin precursor - Homo sapiens (Human)                                             | KAIN_HUMAN           |
| P13645               | Keratin, type I cytoskeletal 10 - Homo sapiens (Human)                                   | K1C10_HUMAN          |
| P08779               | Keratin, type I cytoskeletal 16 - Homo sapiens (Human)                                   | K1C16_HUMAN          |
| P35527               | Keratin, type I cytoskeletal 9 - Homo sapiens (Human)                                    | K1C9_HUMAN           |
| P04264               | Keratin, type II cytoskeletal 1 - Homo sapiens (Human)                                   | K2C1_HUMAN           |
| P35908               | Keratin, type II cytoskeletal 2 epidermal - Homo sapiens (Human)                         | K22E_HUMAN           |
| P13647               | Keratin, type II cytoskeletal 5 - Homo sapiens (Human)                                   | K2C5_HUMAN           |
| Q8IX03               | Kidney and brain protein - Homo sapiens (Human)                                          | WWC1_HUMAN           |
| P01042               | Kininogen-1 precursor - Homo sapiens (Human)                                             | KNG1_HUMAN           |
| P20700               | Lamin-B1 - Homo sapiens (Human)                                                          | LMNB1_HUMAN          |
| P02750               | Leucine-rich alpha-2-glycoprotein precursor - Homo sapiens (Human)                       | A2GL_HUMAN           |
| P18428               | Lipopolysaccharide-binding protein precursor - Homo sapiens (Human)                      | LBP_HUMAN            |
| P07195               | L-lactate dehydrogenase B chain - Homo sapiens (Human)                                   | LDHB_HUMAN           |
| Q07954               | Low-density lipoprotein receptor-related protein 1 precursor - Homo sapiens (Human)      | LRP1_HUMAN           |
| Q9UJ43               | L-selectin precursor - Homo sapiens (Human)                                              | Q9UJ43_HUMAN         |
| P51884               | Lumican precursor - Homo sapiens (Human)                                                 | LUM_HUMAN            |
| Q9Y5Y7               | Lymphatic vessel endothelial hyaluronic acid receptor 1 precursor - Homo sapiens (Hu     | LYVE1_HUMAN          |

| <i>Accession No*</i> | <i>Protein Name*</i>                                                                | <i>Reference No*</i> |
|----------------------|-------------------------------------------------------------------------------------|----------------------|
| P61626               | Lysozyme C precursor - Homo sapiens (Human)                                         | LYSC_HUMAN           |
| O00187               | Mannan-binding lectin serine protease 2 precursor - Homo sapiens (Human)            | MASP2_HUMAN          |
| P11226               | Mannose-binding protein C precursor - Homo sapiens (Human)                          | MBL2_HUMAN           |
| P33908               | Mannosyl-oligosaccharide 1,2-alpha-mannosidase IA - Homo sapiens (Human)            | MA1A1_HUMAN          |
| Q14839               | Mi2-beta - Homo sapiens (Human)                                                     | CHD4_HUMAN           |
| P08571               | Monocyte differentiation antigen CD14 precursor - Homo sapiens (Human)              | CD14_HUMAN           |
| Q7Z7M0               | Multiple epidermal growth factor-like domains 8 - Homo sapiens (Human)              | MEGF8_HUMAN          |
| P35579               | Myosin-9 - Homo sapiens (Human)                                                     | MYH9_HUMAN           |
| Q96PD5               | N-acetylmuramoyl-L-alanine amidase precursor - Homo sapiens (Human)                 | PGRP2_HUMAN          |
| O00533               | Neural cell adhesion molecule L1-like protein precursor - Homo sapiens (Human)      | CHL1_HUMAN           |
| Q14686               | Nuclear receptor coactivator 6 - Homo sapiens (Human)                               | NCOA6_HUMAN          |
| Q6UXB8               | Peptidase inhibitor 16 precursor - Homo sapiens (Human)                             | PI16_HUMAN           |
| P32119               | Peroxiredoxin-2 - Homo sapiens (Human)                                              | PRDX2_HUMAN          |
| P04180               | Phosphatidylcholine-sterol acyltransferase precursor - Homo sapiens (Human)         | LCAT_HUMAN           |
| P80108               | Phosphatidylinositol-glycan-specific phospholipase D precursor - Homo sapiens (Huma | PHLD_HUMAN           |
| P36955               | Pigment epithelium-derived factor precursor - Homo sapiens (Human)                  | PEDF_HUMAN           |
| P05154               | Plasma serine protease inhibitor precursor - Homo sapiens (Human)                   | IPSP_HUMAN           |
| P00747               | Plasminogen precursor - Homo sapiens (Human)                                        | PLMN_HUMAN           |
| P13796               | Plastin-2 - Homo sapiens (Human)                                                    | PLSL_HUMAN           |
| P02775               | Platelet basic protein precursor - Homo sapiens (Human)                             | SCYB7_HUMAN          |
| Q13093               | Platelet-activating factor acetylhydrolase precursor - Homo sapiens (Human)         | PAFA_HUMAN           |
| P15151               | Poliovirus receptor precursor - Homo sapiens (Human)                                | PVR_HUMAN            |
| P20742               | Pregnancy zone protein precursor - Homo sapiens (Human)                             | PZP_HUMAN            |
| Q9UHG3               | Preylcysteine oxidase 1 precursor - Homo sapiens (Human)                            | PCYOX_HUMAN          |
| Q15113               | Procollagen C-endopeptidase enhancer 1 precursor - Homo sapiens (Human)             | PCOC1_HUMAN          |
| P07737               | Profilin-1 - Homo sapiens (Human)                                                   | PROF1_HUMAN          |
| P30101               | Protein disulfide-isomerase A3 precursor - Homo sapiens (Human)                     | PDIA3_HUMAN          |
| P07237               | Protein disulfide-isomerase precursor - Homo sapiens (Human)                        | PDIA1_HUMAN          |
| Q9UK55               | Protein Z-dependent protease inhibitor precursor - Homo sapiens (Human)             | ZPI_HUMAN            |
| Q92954               | Proteoglycan-4 precursor - Homo sapiens (Human)                                     | PRG4_HUMAN           |

| <i>Accession No*</i> | <i>Protein Name*</i>                                                                 | <i>Reference No*</i> |
|----------------------|--------------------------------------------------------------------------------------|----------------------|
| P00734               | Prothrombin precursor - Homo sapiens (Human)                                         | THRB_HUMAN           |
| Q9HBR0               | Putative uncharacterized protein - Homo sapiens (Human)                              | Q9HBR0_HUMA          |
| P14618               | Pyruvate kinase isozymes 2/3 - Homo sapiens (Human)                                  | KPYM_HUMAN           |
| P49908               | Selenoprotein P precursor - Homo sapiens (Human)                                     | SEPP1_HUMAN          |
| Q14738               | Serine/threonine-protein phosphatase 2A 56 kDa regulatory subunit delta isoform - Ho | 2A5D_HUMAN           |
| Q8TCE1               | SERPINC1 protein - Homo sapiens (Human)                                              | Q8TCE1_HUMA          |
| P02735               | Serum amyloid A protein precursor - Homo sapiens (Human)                             | SAA_HUMAN            |
| P35542               | Serum amyloid A-4 protein precursor - Homo sapiens (Human)                           | SAA4_HUMAN           |
| P02743               | Serum amyloid P-component precursor - Homo sapiens (Human)                           | SAMP_HUMAN           |
| P27169               | Serum paraoxonase/arylesterase 1 - Homo sapiens (Human)                              | PON1_HUMAN           |
| P04278               | Sex hormone-binding globulin precursor - Homo sapiens (Human)                        | SHBG_HUMAN           |
| Q14515               | SPARC-like protein 1 precursor - Homo sapiens (Human)                                | SPRL1_HUMAN          |
| O00391               | Sulfhydryl oxidase 1 precursor - Homo sapiens (Human)                                | QSOX1_HUMAN          |
| Q9Y490               | Talin-1 - Homo sapiens (Human)                                                       | TLN1_HUMAN           |
| P05452               | Tetranectin precursor - Homo sapiens (Human)                                         | TETN_HUMAN           |
| P07996               | Thrombospondin-1 precursor - Homo sapiens (Human)                                    | TSP1_HUMAN           |
| P05543               | Thyroxine-binding globulin precursor - Homo sapiens (Human)                          | THBG_HUMAN           |
| Q15582               | Transforming growth factor-beta-induced protein ig-h3 precursor - Homo sapiens (Hum  | BGH3_HUMAN           |
| P37802               | Transgelin-2 - Homo sapiens (Human)                                                  | TAGL2_HUMAN          |
| O43493               | Trans-Golgi network integral membrane protein 2 precursor - Homo sapiens (Human)     | TGON2_HUMAN          |
| P02766               | Transthyretin precursor - Homo sapiens (Human)                                       | TTHY_HUMAN           |
| P67936               | Tropomyosin alpha-4 chain - Homo sapiens (Human)                                     | TPM4_HUMAN           |
| Q86UX7               | Unc-112-related protein 2 - Homo sapiens (Human)                                     | URP2_HUMAN           |
| P19320               | Vascular cell adhesion protein 1 precursor - Homo sapiens (Human)                    | VCAM1_HUMAN          |
| P50552               | Vasodilator-stimulated phosphoprotein - Homo sapiens (Human)                         | VASP_HUMAN           |
| Q6EMK4               | Vasorin precursor - Homo sapiens (Human)                                             | VASN_HUMAN           |
| P02774               | Vitamin D-binding protein precursor - Homo sapiens (Human)                           | VTDB_HUMAN           |
| Q53F31               | Vitamin D-binding protein variant - Homo sapiens (Human)                             | Q53F31_HUMAN         |
| P04070               | Vitamin K-dependent protein C precursor - Homo sapiens (Human)                       | PROC_HUMAN           |
| P07225               | Vitamin K-dependent protein S precursor - Homo sapiens (Human)                       | PROS_HUMAN           |

| <i>Accession No*</i> | <i>Protein Name*</i>                                   | <i>Reference No*</i> |
|----------------------|--------------------------------------------------------|----------------------|
| P04004               | Vitronectin precursor - Homo sapiens (Human)           | VTNC_HUMAN           |
| P04275               | von Willebrand factor precursor - Homo sapiens (Human) | VWF_HUMAN            |
