# Supplementary material
Source: PubMed Central journal article supplement (PMC3251958)
Supplement: NIHMS175878-supplement-9_si_009.pdf [file NIHMS175878-supplement-9_si_009.pdf]

**TableS-4.** Tumor proteins identified in plasma of a patient diagnosed with RCC using subtractive proteomics.

| Protein <sup>a</sup>             | Gene <sup>b</sup> | Location <sup>c</sup> | Cancer <sup>d</sup> | Accession <sup>e</sup> |
|----------------------------------|-------------------|-----------------------|---------------------|------------------------|
| Cadherin-5                       | CDH5              | membrane              | breast              | P33151                 |
| Cadherin-11                      | CDH11             | membrane              | RCC                 | P55287                 |
| DEAD box protein 23              | DDX23             | nucleus               | colon               | Q9BUQ8                 |
| Kidney and brain protein         | WWC1              | cytoplasm             | breast              | Q8IX03                 |
| Mi2-beta                         | CHD4              | nucleus               | ovary               | Q14839                 |
| Nuclear receptor coactivator 6   | NCOA6             | nucleus               | gastric             | Q14686                 |
| Pyruvate kinase 2/3              | PKM2              | cytoplasm             | RCC                 | P14618                 |
| Vascular cell adhesion protein 1 | VCAM1             | membrane              | RCC                 | P19320                 |

<sup>a</sup> Protein name (UniProtKB/Swiss-Prot), <sup>b</sup> Gene name (UniProtKB/Swiss-Prot), <sup>c</sup> Subcellular location (Ingenuity Pathway Analysis), <sup>d</sup> Expression confirmed in cancer (Ingenuity Pathway Analysis), <sup>e</sup> Accession number (UniProtKB/Swiss-Prot).

**Table S-5.** All peptides identifying cadherin-5 detected by LC-MS/MS analysis of tumor sample.

| Protein <sup>a</sup> | Gene <sup>b</sup> | MH <sup>+</sup> <sup>c</sup> | z <sup>d</sup> | Xcorr <sup>e</sup> | ΔCn <sup>f</sup> | Peptide sequence    |
|----------------------|-------------------|------------------------------|----------------|--------------------|------------------|---------------------|
| Cadherin-5           | CDH5              | 1105.53716                   | 2              | 2.7013             | 0.6224           | K.ELDSTGTPTGK.E     |
| Cadherin-5           | CDH5              | 1105.53716                   | 1              | 2.2155             | 0.5139           | K.ELDSTGTPTGK.E     |
| Cadherin-5           | CDH5              | 1105.53716                   | 2              | 2.7275             | 0.7069           | K.ELDSTGTPTGK.E     |
| Cadherin-5           | CDH5              | 1105.53716                   | 1              | 2.7441             | 0.4692           | K.ELDSTGTPTGK.E     |
| Cadherin-5           | CDH5              | 966.48909                    | 2              | 3.0493             | 0.2333           | K.KGDIYNEK.E        |
| Cadherin-5           | CDH5              | 966.48909                    | 2              | 2.8634             | 0.3334           | K.KGDIYNEK.E        |
| Cadherin-5           | CDH5              | 1667.9149                    | 2              | 4.0874             | 0.7237           | K.KPLIGTVLAMPDAAR.H |
| Cadherin-5           | CDH5              | 1667.9149                    | 3              | 4.5346             | 0.6711           | K.KPLIGTVLAMPDAAR.H |
| Cadherin-5           | CDH5              | 1667.9149                    | 2              | 4.1881             | 0.6923           | K.KPLIGTVLAMPDAAR.H |
| Cadherin-5           | CDH5              | 1667.9149                    | 3              | 4.4553             | 0.5157           | K.KPLIGTVLAMPDAAR.H |
| Cadherin-5           | CDH5              | 1085.53743                   | 2              | 3.1732             | 0.5031           | R.TSDKGQFFR.V       |
| Cadherin-5           | CDH5              | 1085.53743                   | 2              | 3.1009             | 0.4432           | R.TSDKGQFFR.V       |

<sup>a</sup> Protein name (UniProtKB/Swiss-Prot), <sup>b</sup> Gene name (UniProtKB/Swiss-Prot), <sup>c</sup> Calculated mass for a given singly-charged peptide, <sup>d</sup> Charge state of the precursor ion selected for CID, <sup>e</sup> Cross-correlation score, <sup>f</sup> Delta correlation score.

**Table S-6.** All peptides identifying cadherin-5 detected by LC-MS/MS in plasma.

| Protein <sup>a</sup> | Gene <sup>b</sup> | MH <sup>+</sup> <sup>c</sup> | z <sup>d</sup> | Xcorr <sup>e</sup> | ΔCn <sup>f</sup> | Peptide sequence    |
|----------------------|-------------------|------------------------------|----------------|--------------------|------------------|---------------------|
| Cadherin-5           | CDH5              | 1105.537                     | 2              | 2.9475             | 0.5093           | K.ELDSTGTPTGK.E     |
| Cadherin-5           | CDH5              | 1667.915                     | 2              | 3.5155             | 0.6865           | K.KPLIGTVLAMPDAAR.H |

<sup>a</sup> Protein name (UniProtKB/Swiss-Prot), <sup>b</sup> Gene name (UniProtKB/Swiss-Prot), <sup>c</sup> Calculated mass for a given singly-charged peptide, <sup>d</sup> Charge state of the precursor ion selected for CID, <sup>e</sup> Cross-correlation score, <sup>f</sup> Delta correlation score.
